# Supplementary material
Source: PubMed Central journal article supplement (PMC2761368)
Supplement: 0909282106_ST1_PDF.pdf [file 0909282106_ST1_PDF.pdf]

**Table S1. Summary of peptides and proteins**

| A. Peptides                |  | N    |
|----------------------------|--|------|
| Peptide IDs                |  | 4324 |
| Unique peptides            |  | 3338 |
| Unique peptides quantified |  | 2430 |

  

| B. Proteins                         | N of hits        |                |
|-------------------------------------|------------------|----------------|
|                                     | Multiple-peptide | Single-peptide |
| Protein IDs                         | 518              | 663            |
| Proteins quantified                 | 495              | 415            |
| Proteins quantified, $\geq 2$ pairs | 438              | 175            |
