# Supplementary material
Source: PubMed Central journal article supplement (PMC2761368)
Supplement: 0909282106_ST2_PDF.pdf [file 0909282106_ST2_PDF.pdf]

**Table S2. List of peptides identified, separated by mouse pair**

Mouse Pair 1

| GI #     | Sequence                      | Modifications    | Protein Name                                                                                           | M/z       | Highest Mascot score | Average Ratio (15N:14N), non-Log-transformed |
|----------|-------------------------------|------------------|--------------------------------------------------------------------------------------------------------|-----------|----------------------|----------------------------------------------|
| 7657429  | AAAITSDLLESGLR                |                  | osteoblast specific factor 2 (fascin I-like) [Mus musculus]                                            | 1416.7731 | 19.27                | 0                                            |
| 33859506 | AADKDTCFSTEGPNLVTR            |                  | albumin 1 [Mus musculus]                                                                               | 1924.9149 | 124.11               | 1.748454424                                  |
| 29789080 | AAESLADPTEYENLFPGLK           |                  | coatamer protein complex, subunit beta 2 (beta prime) [Mus musculus]                                   | 2065.0203 | 27.28                | 0                                            |
| 6753036  | AAFQLGSPWR                    |                  | aldehyde dehydrogenase 2, mitochondrial [Mus musculus]                                                 | 1132.5916 | 31.37                | 1.850253591                                  |
| 6680606  | AALEGLTAETEAR                 |                  | keratin complex 1, acidic, gene 19 [Mus musculus]                                                      | 1331.6868 | 45.13                | 1.946867252                                  |
| 23597151 | AALLAELASLEADALR              |                  | PREDICTED: similar to UDP-N-acteylglucosamine pyrophosphorylase 1-like 1 [Mus musculus]                | 1626.9125 | 38.05                | 0                                            |
| 30911099 | AAMLGQEDPPQHGLPR              |                  | fatty acid synthase [Mus musculus]                                                                     | 1716.8521 | 20.74                | 1.010052458                                  |
| 29126205 | AANEAGYFNEEMAPIEVK            |                  | acetyl-Coenzyme A acyltransferase 2 (mitochondrial 3-oxoacyl-Coenzyme A thiolase) [Mus musculus]       | 1982.9471 | 36.33                | 0                                            |
| 13385006 | AANNGALPPDLSYIVR              |                  | cytochrome c-1 [Mus musculus]                                                                          | 1670.8717 | 33.57                | 0                                            |
| 31542559 | AAPAAAAAMAPGPR                |                  | dihydropolipoamide S-acetyltransferase (E2 component of pyruvate dehydrogenase complex) [Mus musculus] | 1319.692  | 35.96                | 1.600571321                                  |
| 27754065 | AAPFTLEYR                     |                  | pyrophosphatase [Mus musculus]                                                                         | 1067.5548 | 31.38                | 1.983167435                                  |
| 6677995  | AAQSPQQHSSGDPTEESPV           |                  | solute carrier family 16, member 1 [Mus musculus]                                                      | 2080.9148 | 78.94                | 2.036634345                                  |
| 8567336  | AASATLPPITVTPVNVK             |                  | chloride channel calcium activated 3 [Mus musculus]                                                    | 1678.9786 | 70.58                | 0                                            |
| 8567336  | AASATLPPITVTPVNVK             | Deamidation (NQ) | chloride channel calcium activated 3 [Mus musculus]                                                    | 1679.9833 | 41.58                | 0                                            |
| 63474405 | AASDGQYENQSPPEATSPR           |                  | PREDICTED: tensin [Mus musculus]                                                                       | 1907.8406 | 100.83               | 1.119306144                                  |
| 7304889  | AASGFNATEDAQTLR               |                  | annexin A4 [Mus musculus]                                                                              | 1551.7515 | 54.55                | 1.339182794                                  |
| 31981826 | AAVDAGFVPNDMQVGQTGK           |                  | electron transferring flavoprotein, alpha polypeptide [Mus musculus]                                   | 1904.9116 | 54.82                | 1.428393755                                  |
| 31543051 | AAVENLPTFLVELSLR              |                  | karyopherin (importin) beta 1 [Mus musculus]                                                           | 1658.9127 | 27.17                | 1.453431189                                  |
| 51770896 | AAVPSGASTGIYEALRL             |                  | PREDICTED: similar to Alpha enolase (2-phospho-D-glycerate hydro-lyase) (Non-neural enolase) (NNE)     | 1804.9473 | 91.8                 | 1.508144649                                  |
| 27413160 | AAVQQLQAEGLSR                 |                  | carbonyl reductase 3 [Mus musculus]                                                                    | 1467.8007 | 40.97                | 1.704257775                                  |
| 22094075 | AAFYGIYDTAK                   |                  | solute carrier family 25, member 5 [Mus musculus]                                                      | 1219.5991 | 63.05                | 1.230805451                                  |
| 6671539  | ADDGRPFPPQVIK                 |                  | aldolase 1, A isoform [Mus musculus]                                                                   | 1342.7185 | 50.15                | 1.503449941                                  |
| 34328489 | ADFDNTVAIHPTSSSELVTLR         |                  | glutathione reductase 1 [Mus musculus]                                                                 | 2315.1514 | 65.24                | 0                                            |
| 6754084  | ADIVENQVMDTR                  |                  | glutathione S-transferase, mu 1 [Mus musculus]                                                         | 1390.673  | 55.37                | 0                                            |
| 547749   | ADLEMQIESLTELAYLK             | Oxidation (M)    | Keratin, type I cytoskeletal 10 (Cytokeratin 10) (K10) (CK 10)                                         | 2112.0452 | 72.65                | 0.502564139                                  |
| 31981086 | ADLNQIGEPQSPSR                |                  | EF hand domain containing 2 [Mus musculus]                                                             | 1568.7697 | 28.33                | 0                                            |
| 33859811 | ADMVIEAVFEDLGVK               |                  | hydroxyacyl-Coenzyme A dehydrogenase/3-ketoacyl-Coenzyme A thiolase/enoyl-Coenzyme A hydratase (tri    | 1635.8286 | 65.61                | 1.540787                                     |
| 31981100 | ADRDESSPYAAMLAQDVAQR          |                  | ribosomal protein S14 [Mus musculus]                                                                   | 2265.0635 | 50.72                | 1.171532721                                  |
| 31560731 | ADYAQLLEDMQNAFR               |                  | ATPase, H+ transporting, V1 subunit A, isoform 1 [Mus musculus]                                        | 1784.8309 | 19.07                | 0.769881287                                  |
| 63562743 | AEACVFWR                      |                  | PREDICTED: similar to secreted gel-forming mucin [Mus musculus]                                        | 981.4664  | 32.47                | 0.799718322                                  |
| 6679237  | AEAEAQAEELSFPFR               |                  | pyruvate carboxylase [Mus musculus]                                                                    | 1547.7443 | 42.99                | 3.125514103                                  |
| 6996913  | AEDGSVIDYELIQDAR              |                  | annexin A2 [Mus musculus]                                                                              | 1908.8898 | 95.7                 | 1.46794125                                   |
| 31982030 | AEEYEFLTPMEEAPK               |                  | Rho GDP dissociation inhibitor (GDI) alpha [Mus musculus]                                              | 1783.8206 | 53.51                | 0                                            |
| 31981562 | AEGSDVANAVLDGADCIMLSGETAK     |                  | pyruvate kinase 3 [Mus musculus]                                                                       | 2437.1377 | 48.73                | 0                                            |
| 6755372  | AELNEFLTR                     |                  | ribosomal protein S3 [Mus musculus]                                                                    | 1092.5664 | 41.92                | 0.825494104                                  |
| 6678483  | AENYDISPADR                   |                  | ubiquitin-activating enzyme E1, Chr X [Mus musculus]                                                   | 1250.5663 | 33.93                | 1.648496234                                  |
| 20149726 | AETAPLPTSVDDTPEVLNR           |                  | phosphatidate cytidyltransferase 2 [Mus musculus]                                                      | 2024.9946 | 59.83                | 0.938696251                                  |
| 33859506 | AETFTFHSDICTLPEK              |                  | albumin 1 [Mus musculus]                                                                               | 1838.8676 | 19                   | 0                                            |
| 63746482 | AEVGVPAEFGIWTR                |                  | PREDICTED: filamin, alpha [Mus musculus]                                                               | 1531.8037 | 72.98                | 0.899624951                                  |
| 6671702  | AFADALEVIPMALSENSGMNIQTMTEVR  |                  | chaperonin subunit 5 (epsilon) [Mus musculus]                                                          | 3135.5125 | 31.43                | 1.33792349                                   |
| 6753322  | AFADAMEVIPSTLAENAGLNPISTVTELR |                  | chaperonin subunit 4 (delta) [Mus musculus]                                                            | 3030.522  | 27.04                | 1.922773395                                  |
| 63746482 | AFGPGLQGGNAGSPAR              |                  | PREDICTED: filamin, alpha [Mus musculus]                                                               | 1456.7424 | 99.87                | 0.716342152                                  |
| 13384888 | AFIFPQESSTAYVSLIPK            |                  | hypothetical protein LOC66289 [Mus musculus]                                                           | 1998.0714 | 106.61               | 0                                            |
| 10092608 | AFLSSPEHVNRPIINGNGK           |                  | glutathione S-transferase, pi 1 [Mus musculus]                                                         | 1937.0073 | 21.93                | 1.437877403                                  |
| 7710086  | AFLTLAEDILR                   |                  | RAB10, member RAS oncogene family [Mus musculus]                                                       | 1261.7212 | 44.01                | 1.85983522                                   |
| 51491845 | AFMTADLPNELIELLEK             |                  | clathrin, heavy polypeptide (Hc) [Mus musculus]                                                        | 1947.0134 | 57.07                | 1.454923603                                  |
| 37674269 | AFQEQGGQGEQSEPGMSSTPR         |                  | slingshot-like 3 [Mus musculus]                                                                        | 2278.9978 | 24.19                | 0                                            |
| 6677991  | AFYAPVHADDLR                  |                  | solute carrier family 12, member 2 [Mus musculus]                                                      | 1374.6866 | 42.16                | 3.867316772                                  |
| 31982186 | AGAGSATLSMAYAGAR              |                  | malate dehydrogenase 2, NAD (mitochondrial) [Mus musculus]                                             | 1454.7196 | 39.62                | 1.825701457                                  |
| 6671507  | AGFAGDDAPR                    |                  | actin, alpha 2, smooth muscle, aorta [Mus musculus]                                                    | 976.4539  | 66.87                | 0.759976235                                  |
| 6671509  | AGFAGDDAPR                    |                  | actin, beta, cytoplasmic [Mus musculus]                                                                | 976.4539  | 66.87                | 0.759976235                                  |
| 33859811 | AGLEQSGDAGYLAESQK             |                  | hydroxyacyl-Coenzyme A dehydrogenase/3-ketoacyl-Coenzyme A thiolase/enoyl-Coenzyme A hydratase (tri    | 1723.8195 | 80.71                | 1.316868272                                  |
| 20799907 | AGLQFPVGR                     |                  | histone 2, H2aa1 [Mus musculus]                                                                        | 944.5438  | 52.67                | 0.934136691                                  |

|          |                          |                  |                                                                                                     |           |       |             |
|----------|--------------------------|------------------|-----------------------------------------------------------------------------------------------------|-----------|-------|-------------|
| 63562740 | AGLSLMWNR                |                  | PREDICTED: similar to secreted gel-forming mucin [Mus musculus]                                     | 1047.5377 | 33.37 | 0.4826663   |
| 6677775  | AGNLGGGVVTIER            |                  | ribosomal protein L22 [Mus musculus]                                                                | 1242.6871 | 61.54 | 1.819635003 |
| 63746482 | AGNNMLLVGVHGPR           |                  | PREDICTED: filamin, alpha [Mus musculus]                                                            | 1434.7634 | 30.1  | 2.008057944 |
| 41322904 | AGTLSITEFADMLSGNAGGFR    |                  | plectin 1 isoform 1 [Mus musculus]                                                                  | 2115.0173 | 24.59 | 1.017949288 |
| 11230802 | AGTQIENIDEDFR            |                  | actinin alpha 4 [Mus musculus]                                                                      | 1507.707  | 19.23 | 1.153383395 |
| 41322904 | AGVGAPVTQVTLQSTQR        |                  | plectin 1 isoform 1 [Mus musculus]                                                                  | 1712.9348 | 72.88 | 1.112459611 |
| 31980648 | AHGGYSVFAGVGER           |                  | ATP synthase, H+ transporting mitochondrial F1 complex, beta subunit [Mus musculus]                 | 1406.6902 | 57.73 | 1.636197132 |
| 31980648 | AIAELGIYPAVDPLDSTSR      |                  | ATP synthase, H+ transporting mitochondrial F1 complex, beta subunit [Mus musculus]                 | 1988.0414 | 90.42 | 1.472744266 |
| 39652626 | AIAGIINQPYNYQAGPDAALGR   |                  | bisphosphate 3'-nucleotidase 1 [Mus musculus]                                                       | 2436.2415 | 40.44 | 5.362848485 |
| 6678177  | AIEPQKEEADENYSVNTNR      |                  | syntaxin 4A (placental) [Mus musculus]                                                              | 2207.0251 | 47.2  | 0           |
| 12963615 | AILDLEPGTMDSVR           |                  | tubulin, beta 3 [Mus musculus]                                                                      | 1615.8434 | 66.96 | 0.978428372 |
| 7106439  | AILDLEPGTMDSVR           |                  | tubulin, beta 5 [Mus musculus]                                                                      | 1615.8434 | 66.96 | 0.978428372 |
| 21746161 | AILDLEPGTMDSVR           |                  | tubulin, beta [Mus musculus]                                                                        | 1615.8434 | 66.96 | 0.978428372 |
| 6755198  | AINQGGLTSVAVR            |                  | proteasome (prosome, macropain) subunit, alpha type 6 [Mus musculus]                                | 1285.7263 | 35.49 | 1.455107694 |
| 31543942 | AIPDLTAPVAAVQAAVSNLVR    |                  | vinculin [Mus musculus]                                                                             | 2076.1794 | 83.32 | 0.714293169 |
| 6753864  | AIVAGDQNVVEYK            |                  | four and a half LIM domains 1 [Mus musculus]                                                        | 1306.6613 | 81.68 | 0.820573647 |
| 31560560 | AIVAIENPADVSVISSR        |                  | laminin receptor 1 (ribosomal protein SA) [Mus musculus]                                            | 1740.9509 | 79.94 | 1.267327189 |
| 29789343 | AKPAAQSEETATSPAASPTQSAER |                  | eukaryotic translation initiation factor 3, subunit 9 [Mus musculus]                                | 2612.2441 | 79    | 1.061103417 |
| 9845257  | ALAAAGYDVEK              |                  | histone 1, H1c [Mus musculus]                                                                       | 1107.5712 | 79.42 | 0.728827847 |
| 34328365 | ALAAAGYDVEK              |                  | histone 1, H1d [Mus musculus]                                                                       | 1107.5712 | 79.42 | 0.728827847 |
| 13430890 | ALAAAGYDVEK              |                  | histone 1, H1e [Mus musculus]                                                                       | 1107.5712 | 79.42 | 0.728827847 |
| 21426893 | ALAAAGYDVEK              |                  | histone 1, H1b [Mus musculus]                                                                       | 1093.5504 | 48.69 | 1.050268291 |
| 7709980  | ALDIAENEMPLMR            |                  | S-adenosylhomocysteine hydrolase [Mus musculus]                                                     | 1559.7571 | 19.91 | 0.606700398 |
| 547749   | ALEESNYELEK              |                  | Keratin, type I cytoskeletal 10 (Cytokeratin 10) (K10) (CK 10)                                      | 1381.652  | 55.17 | 0           |
| 33598964 | ALELDPNLYR               |                  | myosin heavy chain 10, non-muscle [Mus musculus]                                                    | 1203.6382 | 33.1  | 0.758637071 |
| 7305295  | ALELDPNLYR               |                  | myosin, heavy polypeptide 11, smooth muscle [Mus musculus]                                          | 1203.6382 | 33.1  | 0.758637071 |
| 20137006 | ALELDSNLYR               |                  | myosin, heavy polypeptide 9, non-muscle [Mus musculus]                                              | 1193.6116 | 38.08 | 1.016048466 |
| 23956212 | ALEPEEGNPQTEAQENGP       |                  | HIV TAT specific factor 1 [Mus musculus]                                                            | 2194.9807 | 51.55 | 1.099834295 |
| 6680606  | ALEQANGELEVK             |                  | keratin complex 1, acidic, gene 19 [Mus musculus]                                                   | 1300.6704 | 71.67 | 1.867101699 |
| 6679687  | ALEQLQEYFDGNLK           |                  | glucose regulated protein [Mus musculus]                                                            | 1814.902  | 58.04 | 1.296711023 |
| 6678573  | ALGMTPAAFSALPR           |                  | villin 1 [Mus musculus]                                                                             | 1402.7356 | 27.34 | 2.703180662 |
| 13385942 | ALGVLAQLWSR              |                  | citrate synthase [Mus musculus]                                                                     | 1326.796  | 22.33 | 1.338032463 |
| 6753322  | ALIAGGGAPEIELALR         |                  | chaperonin subunit 4 (delta) [Mus musculus]                                                         | 1550.8934 | 31.86 | 1.415066276 |
| 63489754 | ALINADELANDVAGAEALLDR    |                  | PREDICTED: similar to Spectrin alpha chain, brain (Spectrin, non-erythroid alpha chain) (Alpha-II s | 2154.0955 | 59.25 | 0.868917665 |
| 6671666  | ALLATASQCQPPAGNK         |                  | CAP, adenylate cyclase-associated protein 1 [Mus musculus]                                          | 1600.8123 | 41.41 | 1.197899438 |
| 33859482 | ALLELQLEPEELYQTFQR       |                  | eukaryotic translation elongation factor 2 [Mus musculus]                                           | 2220.1553 | 50.97 | 1.212975289 |
| 34328489 | ALLTPVAIAAGR             |                  | glutathione reductase 1 [Mus musculus]                                                              | 1152.7064 | 31.59 | 1.824695297 |
| 63476037 | ALNLGYALDYALR            |                  | PREDICTED: procollagen, type VI, alpha 3 [Mus musculus]                                             | 1452.7864 | 35.95 | 0.828806353 |
| 63476037 | ALNLGYALDYALR            | Deamidation (NQ) | PREDICTED: procollagen, type VI, alpha 3 [Mus musculus]                                             | 1453.796  | 21.44 | 0           |
| 34328204 | ALNPLEDWLR               |                  | valyl-tRNA synthetase 2 [Mus musculus]                                                              | 1226.658  | 19.13 | 1.494723889 |
| 63506192 | ALPFWNNEIVPQIK           |                  | PREDICTED: similar to phosphoglycerate mutase (EC 5.4.2.1) B chain - rat [Mus musculus]             | 1683.9099 | 35.17 | 1.364136323 |
| 21704020 | ALSEIAGITLPYDLDQVR       |                  | NADH dehydrogenase (ubiquinone) Fe-S protein 1 [Mus musculus]                                       | 2075.1021 | 54.39 | 1.682938057 |
| 22165384 | ALTVPELTQQMFDAK          |                  | tubulin, beta, 2 [Mus musculus]                                                                     | 1691.8682 | 53.93 | 1.122638561 |
| 12963615 | ALTVPELTQQMFDAK          |                  | tubulin, beta 3 [Mus musculus]                                                                      | 1691.8682 | 53.93 | 1.122638561 |
| 31981939 | ALTVPELTQQMFDAK          |                  | tubulin, beta 4 [Mus musculus]                                                                      | 1691.8682 | 53.93 | 1.122638561 |
| 27754056 | ALTVPELTQQMFDAK          |                  | tubulin, beta 6 [Mus musculus]                                                                      | 1691.8682 | 53.93 | 1.122638561 |
| 6754556  | ALYETELADAR              |                  | lamin B1 [Mus musculus]                                                                             | 1251.6277 | 29.22 | 0           |
| 19526818 | ALYSNILGEENTYLWR         |                  | solute carrier family 25 (mitochondrial carrier, phosphate carrier), member 3 [Mus musculus]        | 1941.9689 | 28.48 | 2.647568663 |
| 14389431 | AMADPEVQQIMSDPAMR        |                  | stress-induced phosphoprotein 1 [Mus musculus]                                                      | 1889.8594 | 23.49 | 1.354401801 |
| 20874851 | AMGIMNSFVNDIFER          | Deamidation (NQ) | PREDICTED: similar to histone H2b-616 [Mus musculus]                                                | 1743.8346 | 25.76 | 0.688710601 |
| 20874851 | AMGIMNSFVNDIFER          | Oxidation (M)    | PREDICTED: similar to histone H2b-616 [Mus musculus]                                                | 1744.821  | 54.68 | 0           |
| 20874851 | AMGIMNSFVNDIFER          |                  | PREDICTED: similar to histone H2b-616 [Mus musculus]                                                | 1759.8138 | 21.85 | 0.707080737 |
| 21312712 | AMLSGPGQAENETNEVNR       |                  | transcription elongation factor B (SIII), polypeptide 1 [Mus musculus]                              | 2211.0232 | 25.89 | 0           |
| 31981549 | ANIIIFNTALGTIFGVK        |                  | sulfide quinone reductase-like [Mus musculus]                                                       | 1678.9368 | 83.03 | 1.375106503 |
| 63746482 | ANLPQSFQVDTSK            |                  | PREDICTED: filamin, alpha [Mus musculus]                                                            | 1434.7219 | 73.5  | 0.731627954 |
| 20137006 | ANLQIDQINTDLNLER         |                  | myosin, heavy polypeptide 9, non-muscle [Mus musculus]                                              | 1869.9647 | 61.78 | 1.152503    |
| 19745150 | APDAWDYSQGFVNEEMIR       |                  | diaphorase 1 [Mus musculus]                                                                         | 2127.9548 | 40.66 | 1.539835252 |
| 6754750  | APDFVIFYAPR              |                  | moesin [Mus musculus]                                                                               | 1182.5973 | 59.21 | 0.967006469 |
| 6678571  | APDFVIFYAPR              |                  | villin 2 [Mus musculus]                                                                             | 1182.5973 | 59.21 | 0.967006469 |
| 6681157  | APILIATDVASR             |                  | DEAD (Asp-Glu-Ala-Asp) box polypeptide 5 [Mus musculus]                                             | 1226.713  | 39.42 | 2.080570587 |

|          |                                         |                                                                                                     |           |       |             |
|----------|-----------------------------------------|-----------------------------------------------------------------------------------------------------|-----------|-------|-------------|
| 40068493 | APILIATDVASR                            | DEAD box polypeptide 17 isoform 1 [Mus musculus]                                                    | 1226.713  | 39.42 | 2.080570587 |
| 33859506 | APQVSTPTLVEAAR                          | albumin 1 [Mus musculus]                                                                            | 1439.799  | 75.45 | 2.155585092 |
| 33563250 | APSYGAGELLDFSLADAVNQEFLATR              | desmin [Mus musculus]                                                                               | 2755.3611 | 59.9  | 0.678317293 |
| 7106435  | APTAQVESFR                              | tenascin C [Mus musculus]                                                                           | 1105.5635 | 26.84 | 1.709436908 |
| 13384888 | APTNLDPDPAR                             | hypothetical protein LOC66289 [Mus musculus]                                                        | 1051.5559 | 22.78 | 0           |
| 6671664  | APVPTGEVYFADSFDR                        | calnexin [Mus musculus]                                                                             | 1770.8397 | 45.32 | 1.347343854 |
| 6679515  | AQAALQAVNSVQSGNLALAAASAAVDAGMAMAGQSPVLR | polypyrimidine tract binding protein 1 [Mus musculus]                                               | 3680.8481 | 28.82 | 1.305968821 |
| 41322904 | AQAEAQQPVFNTRL                          | plectin 1 isoform 1 [Mus musculus]                                                                  | 1572.8198 | 35.41 | 1.650723581 |
| 41322904 | AQAEAQQPVFNTRL                          | plectin 1 isoform 1 [Mus musculus]                                                                  | 1573.8135 | 36.53 | 1.412951163 |
| 41322904 | AQAELEAQLQR                             | plectin 1 isoform 1 [Mus musculus]                                                                  | 1385.7056 | 24.5  | 1.294236217 |
| 31982520 | AQDTAELFFEDVR                           | acetyl-Coenzyme A dehydrogenase, long-chain [Mus musculus]                                          | 1540.7344 | 39.42 | 1.934407463 |
| 51828444 | AQEAEEEEPPAVTPAASVSALDLGEQR             | PREDICTED: proline-rich polypeptide 6 [Mus musculus]                                                | 2775.375  | 55.29 | 1.959808375 |
| 29789289 | AQFGQPEILLGTIPGAGGTQR                   | enoyl Coenzyme A hydratase, short chain, 1, mitochondrial [Mus musculus]                            | 2111.1248 | 63.48 | 1.765881621 |
| 6679583  | AQIWDTAGQER                             | RAB11B, member RAS oncogene family [Mus musculus]                                                   | 1274.6198 | 48.58 | 1.215591311 |
| 6754482  | AQMEQLNGVLLHLESELAQTR                   | keratin complex 1, acidic, gene 18 [Mus musculus]                                                   | 2380.2217 | 31.49 | 1.289061127 |
| 33468857 | AQVAQPGGDTIFGK                          | histidine triad nucleotide binding protein 1 [Mus musculus]                                         | 1388.7142 | 57.65 | 1.49185782  |
| 63489759 | ASAFNSWFENAEEDLTDVPR                    | PREDICTED: spectrin alpha 2 [Mus musculus]                                                          | 2298.0459 | 33.86 | 1.859035106 |
| 34328206 | ASEDFVDPWTVR                            | tryptophanyl-tRNA synthetase [Mus musculus]                                                         | 1421.6758 | 29.2  | 3.850738128 |
| 6755358  | ASGNYATVISHNPETK                        | ribosomal protein L8 [Mus musculus]                                                                 | 1688.8256 | 78.59 | 1.110295763 |
| 63746482 | ASGPGNLNTGVPASLPVEFTIDAK                | PREDICTED: filamin, alpha [Mus musculus]                                                            | 2342.207  | 44.35 | 0           |
| 9845257  | ASGPPVSELITK                            | histone 1, H1c [Mus musculus]                                                                       | 1198.6692 | 51.27 | 0           |
| 34328365 | ASGPPVSELITK                            | histone 1, H1d [Mus musculus]                                                                       | 1198.6692 | 51.27 | 0           |
| 23943876 | ASGTSFNAPVPLHPNTVLR                     | zymogen granule membrane protein 16 [Mus musculus]                                                  | 1881.0039 | 56.84 | 0.949886088 |
| 13624315 | ASLEAAIADAEQR                           | keratin complex 2, basic, gene 8 [Mus musculus]                                                     | 1344.6844 | 91.62 | 1.881826801 |
| 6679931  | ASLGLTNTLADVPDDEVQGR                    | UDP-N-acetyl-alpha-D-galactosamine: (N-acetylneuraminy)-galactosyl-N- acetylglucosaminylpolypeptid  | 2071.0293 | 36.06 | 1.269967628 |
| 31543605 | ASSFVLALEPELESR                         | ribophorin I [Mus musculus]                                                                         | 1647.8611 | 71.07 | 1.245366072 |
| 21313526 | ASTPDWPSQDPQPLQR                        | hypothetical protein LOC78906 [Mus musculus]                                                        | 1879.8956 | 22.66 | 1.974841505 |
| 8567336  | ASVTALIESVNGK                           | chloride channel calcium activated 3 [Mus musculus]                                                 | 1288.7263 | 37.06 | 0           |
| 9845283  | ASYVAPLTAQPATYR                         | RNA binding motif protein 14 [Mus musculus]                                                         | 1608.8451 | 25.79 | 1.354573903 |
| 7305163  | ATAGDTHLGGEDFDNR                        | heat shock protein 1-like [Mus musculus]                                                            | 1675.7471 | 89.54 | 0           |
| 63704924 | ATAGDTHLGGEDFDNR                        | PREDICTED: heat shock protein 1B [Mus musculus]                                                     | 1675.7471 | 89.54 | 0           |
| 6754976  | ATAVMPDGGFK                             | peroxiredoxin 1 [Mus musculus]                                                                      | 1164.571  | 75.5  | 1.26051304  |
| 6679567  | ATEMVEVGPEDDEVGAER                      | polymerase I and transcript release factor [Mus musculus]                                           | 1932.8552 | 99.71 | 1.336811705 |
| 10946928 | ATENDIYNFFSPLNPVR                       | heterogeneous nuclear ribonucleoprotein H1 [Mus musculus]                                           | 1996.9789 | 77.37 | 1.286382575 |
| 6677871  | ATEVPLSWESFNK                           | scinderin [Mus musculus]                                                                            | 1507.7341 | 37.37 | 0           |
| 7305295  | ATLQAEQLSNELATER                        | myosin, heavy polypeptide 11, smooth muscle [Mus musculus]                                          | 1773.8992 | 76.83 | 0.986784305 |
| 6753492  | ATPEPSGTPSSDVTVR                        | coronin, actin binding protein 1A [Mus musculus]                                                    | 1588.752  | 85.02 | 0.247717557 |
| 21450625 | ATQALVLAPTR                             | eukaryotic translation initiation factor 4A1 [Mus musculus]                                         | 1140.6801 | 32.57 | 1.035391038 |
| 33859650 | ATYSTNSPVWEEAFR                         | membrane bound C2 domain containing protein [Mus musculus]                                          | 1757.818  | 19.82 | 0           |
| 6753320  | AVAQALEVIPR                             | chaperonin subunit 3 (gamma) [Mus musculus]                                                         | 1166.689  | 29.6  | 1.830179519 |
| 22267442 | AVAQGNLSSADVQAAK                        | ubiquinol cytochrome c reductase core protein 2 [Mus musculus]                                      | 1529.7981 | 55.21 | 0           |
| 6680748  | AVDSLVPPIGR                             | ATP synthase, H+ transporting, mitochondrial F1 complex, alpha subunit, isoform 1 [Mus musculus]    | 1026.5939 | 30.81 | 1.495388587 |
| 25020120 | AVEASNAYSSILQAVQAAEDAAGQALR             | PREDICTED: laminin, alpha 5 [Mus musculus]                                                          | 2704.3533 | 59.77 | 0.58027614  |
| 18079351 | AVFPQNLVSVSDVQSVPEVDQR                  | major vault protein [Mus musculus]                                                                  | 2569.3245 | 24.81 | 2.079499749 |
| 6671507  | AVFPSIVGRPR                             | actin, alpha 2, smooth muscle, aorta [Mus musculus]                                                 | 1198.7131 | 29.39 | 0.840528143 |
| 6671509  | AVFPSIVGRPR                             | actin, beta, cytoplasmic [Mus musculus]                                                             | 1198.7131 | 29.39 | 0.840528143 |
| 21450277 | AVFQANQENLPIK                           | Na+/K+ -ATPase alpha 1 subunit [Mus musculus]                                                       | 1584.8723 | 48.66 | 1.764951201 |
| 6678467  | AVFVDLEPTVIDEIR                         | tubulin, alpha 4 [Mus musculus]                                                                     | 1715.9214 | 87.7  | 1.685522375 |
| 6755901  | AVFVDLEPTVIDEVR                         | tubulin, alpha 1 [Mus musculus]                                                                     | 1701.9095 | 96.94 | 1.292640562 |
| 34740335 | AVFVDLEPTVIDEVR                         | tubulin, alpha 2 [Mus musculus]                                                                     | 1701.9095 | 96.94 | 1.292640562 |
| 6678469  | AVFVDLEPTVIDEVR                         | tubulin, alpha 6 [Mus musculus]                                                                     | 1701.9095 | 96.94 | 1.292640562 |
| 28916673 | AVITSLLDQIPEMFADTR                      | SEC24 related gene family, member C [Mus musculus]                                                  | 2020.0369 | 34.45 | 1.098952625 |
| 22165384 | AVLVDLEPGTMDSVR                         | tubulin, beta, 2 [Mus musculus]                                                                     | 1601.8221 | 67.78 | 1.686475363 |
| 31981939 | AVLVDLEPGTMDSVR                         | tubulin, beta 4 [Mus musculus]                                                                      | 1601.8221 | 67.78 | 1.686475363 |
| 30578429 | AVPVSNIAPAAVGR                          | hypothetical protein LOC94184 [Mus musculus]                                                        | 1321.7675 | 41.64 | 1.625443939 |
| 7305085  | AVQTLQMEQLQIMK                          | glutamine fructose-6-phosphate transaminase 1 [Mus musculus]                                        | 1660.8646 | 62.14 | 1.375245678 |
| 7305085  | AVQTLQMEQLQIMK                          | glutamine fructose-6-phosphate transaminase 1 [Mus musculus]                                        | 1661.8654 | 38.98 | 1.856750136 |
| 6756039  | AVTEQGAELSNEER                          | tyrosine 3-monooxygenase/tryptophan 5-monooxygenase activation protein, theta polypeptide [Mus musc | 1532.7262 | 94.43 | 1.077769116 |
| 7305173  | AVTQSAEITIPVTFEAR                       | heat shock protein 1 [Mus musculus]                                                                 | 1832.9688 | 52.08 | 0.641271262 |
| 63746482 | AWGPGLEGGIVGK                           | PREDICTED: filamin, alpha [Mus musculus]                                                            | 1240.6644 | 53.14 | 0           |

|          |                            |                  |                                                                                                         |           |        |             |
|----------|----------------------------|------------------|---------------------------------------------------------------------------------------------------------|-----------|--------|-------------|
| 6753138  | AYGENIGYSEK                |                  | Na+/K+ -ATPase beta 1 subunit [Mus musculus]                                                            | 1230.5664 | 88.81  | 1.793620974 |
| 6753138  | AYGENIGYSEKDR              |                  | Na+/K+ -ATPase beta 1 subunit [Mus musculus]                                                            | 1501.696  | 56.36  | 1.933344166 |
| 63746482 | AYGPGIEPTGNMVK             |                  | PREDICTED: filamin, alpha [Mus musculus]                                                                | 1433.7098 | 39.59  | 0.505527157 |
| 33859482 | AYLPVNESFGFTADLR           |                  | eukaryotic translation elongation factor 2 [Mus musculus]                                               | 1799.8955 | 34.13  | 1.308099657 |
| 63746482 | CGQSAAVASPGGSIDSR          |                  | PREDICTED: filamin, alpha [Mus musculus]                                                                | 1562.73   | 66.61  | 0.845112316 |
| 6679759  | CPPGFYTPDGTTR              |                  | fibrillin 1 [Mus musculus]                                                                              | 1397.6311 | 23.25  | 0           |
| 547749   | DAEAWFNEK                  |                  | Keratin, type I cytoskeletal 10 (Cytokeratin 10) (K10) (CK 10)                                          | 1109.4869 | 19.32  | 0           |
| 6755478  | DAEDAMDAMDGAVLDGR          |                  | splicing factor, arginine/serine-rich 2 [Mus musculus]                                                  | 1751.7358 | 107.74 | 1.050955919 |
| 21450277 | DAFQNAYLELGGGLGER          |                  | Na+/K+ -ATPase alpha 1 subunit [Mus musculus]                                                           | 1752.8666 | 51.51  | 0.945402167 |
| 63746482 | DAGEGLLAVQITDPEGKPK        | Deamidation (NQ) | PREDICTED: filamin, alpha [Mus musculus]                                                                | 1938.9908 | 26.9   | 0           |
| 6754036  | DAGMQLQGYR                 |                  | glutamate oxaloacetate transaminase 2, mitochondrial [Mus musculus]                                     | 1138.5382 | 23.5   | 1.459355648 |
| 6754256  | DAGQISGLNVLR               |                  | heat shock protein 9A [Mus musculus]                                                                    | 1242.6766 | 48.23  | 0           |
| 6754256  | DAGQISGLNVLR               | Deamidation (NQ) | heat shock protein 9A [Mus musculus]                                                                    | 1243.6626 | 23.45  | 2.523078797 |
| 31981690 | DAGTIAGLNVLR               |                  | heat shock protein 8 [Mus musculus]                                                                     | 1199.689  | 59.88  | 1.427085163 |
| 63664182 | DAGTIAGLNVLR               |                  | PREDICTED: similar to heat shock protein 8 [Mus musculus]                                               | 1199.689  | 59.88  | 1.427085163 |
| 31981722 | DAGTIAGLNVMR               |                  | heat shock 70kD protein 5 (glucose-regulated protein) [Mus musculus]                                    | 1217.6335 | 68.24  | 1.233038044 |
| 30424898 | DALVNAVIDSL SAYR           |                  | SEC24 related gene family, member A [Mus musculus]                                                      | 1606.8512 | 31.31  | 0           |
| 31542602 | DANLYISGLPR                |                  | ELAV (embryonic lethal, abnormal vision, Drosophila)-like 1 (Hu antigen R) [Mus musculus]               | 1218.6418 | 32.86  | 0           |
| 41322904 | DAPDGPVSEAEPEYTFEGLR       |                  | plectin 1 isoform 1 [Mus musculus]                                                                      | 2178.9922 | 62.41  | 1.284382972 |
| 21592285 | DAQVNAQCCLR                |                  | keratin 20 [Mus musculus]                                                                               | 1344.6714 | 36.78  | 2.43186246  |
| 30348966 | DASVAEAWLLGQEPYLSR         |                  | spectrin beta 2 isoform 1 [Mus musculus]                                                                | 2092.021  | 26.97  | 1.600737077 |
| 31542333 | DAVIYPILVEFTR              |                  | hypoxia up-regulated 1 [Mus musculus]                                                                   | 1535.8491 | 28.52  | 1.078406003 |
| 31981562 | DAVLNAWAEDVDLR             |                  | pyruvate kinase 3 [Mus musculus]                                                                        | 1586.7854 | 83.75  | 1.529892526 |
| 31981562 | DAVLNAWAEDVDLR             | Deamidation (NQ) | pyruvate kinase 3 [Mus musculus]                                                                        | 1587.7896 | 20.12  | 0           |
| 6755809  | DDILNGSHPVSFDR             |                  | talin 1 [Mus musculus]                                                                                  | 1543.7416 | 28.86  | 0           |
| 6754036  | DDNGKPYVLPVSR              |                  | glutamate oxaloacetate transaminase 2, mitochondrial [Mus musculus]                                     | 1459.757  | 35.41  | 1.278433076 |
| 33859506 | DDNPSLPPFERPEAEAMCTSFK     |                  | albumin 1 [Mus musculus]                                                                                | 2481.0977 | 24.86  | 1.639239322 |
| 19072792 | DDTESLEIFQNEVAR            |                  | thioredoxin domain containing 4 [Mus musculus]                                                          | 1765.8329 | 35.5   | 0           |
| 6681027  | DDTYQSYSSPSR               |                  | deleted in malignant brain tumors 1 [Mus musculus]                                                      | 1502.6542 | 47.28  | 2.211931104 |
| 31981100 | DESSPYAAMLAQDVQAR          |                  | ribosomal protein S14 [Mus musculus]                                                                    | 1922.8931 | 112.58 | 0           |
| 6680047  | DETNYGIPQR                 |                  | guanine nucleotide binding protein (G protein), beta polypeptide 2 like 1 [Mus musculus]                | 1192.5647 | 54.03  | 1.328071585 |
| 22203747 | DFDSLAAQPSFFDR             |                  | procollagen, type VI, alpha 2 [Mus musculus]                                                            | 1544.7072 | 40.28  | 0           |
| 8393150  | DFEQPLAISR                 |                  | carboxyl terminal LIM domain protein 1 [Mus musculus]                                                   | 1175.5983 | 24.69  | 1.033817838 |
| 31981282 | DFLLQQTMLR                 |                  | glyoxalase 1 [Mus musculus]                                                                             | 1264.6796 | 20.88  | 0           |
| 6755142  | DFMIQGGDFTR                |                  | peptidylprolyl isomerase B [Mus musculus]                                                               | 1286.5879 | 50.6   | 1.0250242   |
| 58037117 | DFPLTGYVELR                |                  | NADH dehydrogenase (ubiquinone) Fe-S protein 3 [Mus musculus]                                           | 1309.6783 | 32.33  | 0           |
| 20137006 | DFSALSQLQDQTQELLQEENR      |                  | myosin, heavy polypeptide 9, non-muscle [Mus musculus]                                                  | 2493.1753 | 76.34  | 1.195647936 |
| 6755714  | DFTDSLQLEGGK               |                  | transgelin [Mus musculus]                                                                               | 1267.5826 | 74.33  | 0.921271027 |
| 10181184 | DFTPSGIAGAFR               |                  | ATP synthase, H+ transporting, mitochondrial F0 complex, subunit f, isoform 2 [Mus musculus]            | 1238.6161 | 33.53  | 1.49909538  |
| 6681233  | DGAFDFFPVLR                |                  | solute carrier family 26 (sulfate transporter), member 2 [Mus musculus]                                 | 1283.6479 | 24.5   | 2.006394475 |
| 58037267 | DGELPVEDDIDLSDVELDDLEKDEL  |                  | protein disulfide isomerase-associated 6 [Mus musculus]                                                 | 2830.2896 | 82.6   | 0           |
| 33563250 | DGEVVSEATQQQHEVL           |                  | desmin [Mus musculus]                                                                                   | 1768.8423 | 101.66 | 0.579028415 |
| 22164798 | DGFNPAHVEAGLYGSR           |                  | selenium binding protein 1 [Mus musculus]                                                               | 1689.8083 | 94.9   | 2.823733985 |
| 27754067 | DGMEYPFIGEGEPHVDGEPGLDR    |                  | DnaJ (Hsp40) homolog, subfamily B, member 11 [Mus musculus]                                             | 2516.1099 | 44.51  | 1.008970598 |
| 22779879 | DGNGQITDKPVQQAQVQIR        |                  | desmoglein 2 [Mus musculus]                                                                             | 2095.0891 | 34.98  | 1.132832386 |
| 7709980  | DGPLNMILDDGGDLTNIHTK       |                  | S-adenosylhomocysteine hydrolase [Mus musculus]                                                         | 2252.0955 | 56.61  | 0           |
| 30409956 | DGPNALTPPPTTPEWVK          |                  | ATPase, Na+/K+ transporting, alpha 2 polypeptide [Mus musculus]                                         | 1819.9259 | 38.91  | 1.963523373 |
| 21450277 | DGPNALTPPPTTPEWVK          |                  | Na+/K+ -ATPase alpha 1 subunit [Mus musculus]                                                           | 1819.9259 | 38.91  | 1.963523373 |
| 27229048 | DGQVIGIGAGQQSR             |                  | 5-aminoimidazole-4-carboxamide ribonucleotide formyltransferase/IMP cyclohydrolase [Mus musculus]       | 1385.7125 | 62.42  | 1.062005323 |
| 31982755 | DGQVINETSQHHDDLE           |                  | vimentin [Mus musculus]                                                                                 | 1836.8041 | 81.35  | 1.170440766 |
| 45597447 | DGVANVSIEDR                |                  | superoxide dismutase 1, soluble [Mus musculus]                                                          | 1174.5726 | 55.62  | 1.736065907 |
| 20806532 | DGVPEGTQLQAHHR             |                  | cold shock domain protein A short isoform [Mus musculus]                                                | 1407.6978 | 21.45  | 1.4983226   |
| 18079339 | DGYAQILR                   |                  | aconitase 2, mitochondrial [Mus musculus]                                                               | 935.498   | 42.55  | 1.943722719 |
| 34328400 | DGYDYDGYR                  |                  | splicing factor, arginine/serine-rich 1 (ASF/SF2) [Mus musculus]                                        | 1123.436  | 26.32  | 1.662610799 |
| 6680117  | DGYMPSQYNSQNWEAR           | Deamidation (NQ) | glutathione synthetase [Mus musculus]                                                                   | 1946.8295 | 36.97  | 0           |
| 22203747 | DIANSHEL YR                |                  | procollagen, type VI, alpha 2 [Mus musculus]                                                            | 1314.6388 | 47.77  | 0.415829882 |
| 6756041  | DICNDVLSLEK                |                  | tyrosine 3-monooxygenase/tryptophan 5-monooxygenase activation protein, zeta polypeptide [Mus musculus] | 1361.6997 | 62.04  | 1.41646201  |
| 63556656 | DILCQALAA YAAACQAAGIK      |                  | PREDICTED: RIKEN cDNA A430096B05 gene [Mus musculus]                                                    | 1964.9945 | 129.5  | 0           |
| 6753374  | DINDNAPVFN PSTYQQQVPENEVNR |                  | cadherin 1 [Mus musculus]                                                                               | 2888.3372 | 94.02  | 1.517500836 |
| 9790073  | DINDNRPTFLQSK              |                  | cadherin 17 [Mus musculus]                                                                              | 1547.791  | 32.26  | 1.766140823 |

|          |                          |                    |                                                                                                     |           |        |             |
|----------|--------------------------|--------------------|-----------------------------------------------------------------------------------------------------|-----------|--------|-------------|
| 18079339 | DINQEVYNFLATAGAK         |                    | aconitase 2, mitochondrial [Mus musculus]                                                           | 1753.8767 | 60.24  | 1.348560899 |
| 18079339 | DINQEVYNFLATAGAK         | Deamidation (NQ)   | aconitase 2, mitochondrial [Mus musculus]                                                           | 1754.88   | 33.17  | 0           |
| 31981748 | DISSAVQANPALTELRL        |                    | ribonuclease/angiogenin inhibitor 1 [Mus musculus]                                                  | 1885.0104 | 30.75  | 1.334632258 |
| 6755863  | DISTNYASQK               |                    | tumor rejection antigen gp96 [Mus musculus]                                                         | 1289.6099 | 65.29  | 1.509177002 |
| 23956222 | DITYFIQQLLR              |                    | ARP3 actin-related protein 3 homolog [Mus musculus]                                                 | 1409.7874 | 59.04  | 1.248573866 |
| 19882201 | DKTPVQSQPSATTTPSGADEK    |                    | proteasome 26S non-ATPase subunit 2 [Mus musculus]                                                  | 2172.0493 | 54.03  | 1.088863744 |
| 6754524  | DLADELALVDVMDK           |                    | lactate dehydrogenase 1, A chain [Mus musculus]                                                     | 1675.8198 | 94.55  | 1.680867789 |
| 6671549  | DLAILLGMLDPVEK           |                    | peroxiredoxin 6 [Mus musculus]                                                                      | 1526.8458 | 80.69  | 1.74400466  |
| 30348966 | DLDDFQSWLSR              |                    | spectrin beta 2 isoform 1 [Mus musculus]                                                            | 1381.6479 | 27.62  | 2.01788985  |
| 27370092 | DLDKPFLLPVESVYIPGR       |                    | Tu translation elongation factor, mitochondrial [Mus musculus]                                      | 2145.123  | 26.91  | 1.649359299 |
| 6755809  | DLDQASLAAVSQQLAPR        |                    | talin 1 [Mus musculus]                                                                              | 1782.9408 | 58.57  | 0           |
| 10946574 | DLFDPIIEER               |                    | creatine kinase, brain [Mus musculus]                                                               | 1246.631  | 58.16  | 0           |
| 6679687  | DLFSDGHSEFLK             |                    | glucose regulated protein [Mus musculus]                                                            | 1394.6545 | 57.91  | 1.120768767 |
| 25020120 | DLGAQGAVAEAEAEAR         |                    | PREDICTED: laminin, alpha 5 [Mus musculus]                                                          | 1798.885  | 30.71  | 0           |
| 7305295  | DLGEELEALKTELEDLSTATQQLR |                    | myosin, heavy polypeptide 11, smooth muscle [Mus musculus]                                          | 3047.4688 | 51.02  | 0.796681524 |
| 6753240  | DLGLSESGEDVNAAILDESGKK   |                    | calcium binding protein, intestinal [Mus musculus]                                                  | 2247.0981 | 67.01  | 0.846225008 |
| 31981302 | DLIEDLKYELTKG            |                    | annexin A6 [Mus musculus]                                                                           | 1536.8075 | 50.38  | 1.789226033 |
| 38198665 | DLIHDQDEEEEEEGQR         |                    | p47 protein [Mus musculus]                                                                          | 2099.8687 | 104.56 | 1.234814763 |
| 7657429  | DLTQPGDWTLFAPTNDAFK      |                    | osteoblast specific factor 2 (fasciilin I-like) [Mus musculus]                                      | 2250.0889 | 22.14  | 0           |
| 21704100 | DLMPHDLAR                |                    | hydroxyacyl-Coenzyme A dehydrogenase/3-ketoacyl-Coenzyme A thiolase/enoyl-Coenzyme A hydratase (tri | 1067.5328 | 29.96  | 0           |
| 6681233  | DLPEEAFGFPSELPLETQR      |                    | solute carrier family 26 (sulfate transporter), member 2 [Mus musculus]                             | 2175.0583 | 21.91  | 1.885610944 |
| 47578123 | DLQLVLPDYFFER            |                    | potassium channel tetramerisation domain containing 12 [Mus musculus]                               | 1604.8356 | 36.88  | 0.781016485 |
| 18266680 | DLTAVSNNAGVDNFGLLLR      |                    | 3-oxoacid CoA transferase 1 [Mus musculus]                                                          | 2159.1392 | 36.17  | 0.858019828 |
| 6671507  | DLTDYLMK                 |                    | actin, alpha 2, smooth muscle, aorta [Mus musculus]                                                 | 998.4835  | 57.63  | 0.958521105 |
| 6671509  | DLTDYLMK                 |                    | actin, beta, cytoplasmic [Mus musculus]                                                             | 998.4835  | 57.63  | 0.958521105 |
| 30425250 | DLTDYLMK                 |                    | hypothetical protein LOC238880 [Mus musculus]                                                       | 998.4835  | 57.63  | 0.958521105 |
| 63652452 | DLTDYLMK                 |                    | PREDICTED: similar to cytoplasmic beta-actin [Mus musculus]                                         | 998.4835  | 57.63  | 0.958521105 |
| 58037465 | DLTTAGAVTQCYR            |                    | Ribosomal protein L18A [Mus musculus]                                                               | 1398.6791 | 64.97  | 1.086158517 |
| 34328286 | DLVPDLSNFYQYK            |                    | succinate dehydrogenase 1p subunit [Mus musculus]                                                   | 1672.8037 | 29.35  | 0           |
| 29293809 | DLVSSLTGSLLTIGDR         |                    | ATP citrate lyase [Mus musculus]                                                                    | 1646.9008 | 69.04  | 1.878840293 |
| 6671507  | DLYANNVLSGGTTMYPGIADR    |                    | actin, alpha 2, smooth muscle, aorta [Mus musculus]                                                 | 2228.1086 | 147.14 | 0.413817086 |
| 6671507  | DLYANNVLSGGTTMYPGIADR    | 2 Deamidation (NQ) | actin, alpha 2, smooth muscle, aorta [Mus musculus]                                                 | 2230.0652 | 19.08  | 0           |
| 6671507  | DLYANNVLSGGTTMYPGIADR    | Deamidation (NQ)   | actin, alpha 2, smooth muscle, aorta [Mus musculus]                                                 | 2229.0518 | 118.28 | 0           |
| 6671507  | DLYANNVLSGGTTMYPGIADR    | Oxidation (M)      | actin, alpha 2, smooth muscle, aorta [Mus musculus]                                                 | 2244.063  | 39.17  | 0.411398634 |
| 6671509  | DLYANTVLSGGTTMYPGIADR    |                    | actin, beta, cytoplasmic [Mus musculus]                                                             | 2215.0906 | 131.49 | 1.024873223 |
| 63652452 | DLYANTVLSGGTTMYPGIADR    |                    | PREDICTED: similar to cytoplasmic beta-actin [Mus musculus]                                         | 2215.0906 | 131.49 | 1.024873223 |
| 6671509  | DLYANTVLSGGTTMYPGIADR    | Oxidation (M)      | actin, beta, cytoplasmic [Mus musculus]                                                             | 2231.0759 | 26.92  | 0.932840687 |
| 63652452 | DLYANTVLSGGTTMYPGIADR    | Oxidation (M)      | PREDICTED: similar to cytoplasmic beta-actin [Mus musculus]                                         | 2231.0759 | 26.92  | 0.932840687 |
| 20137006 | DMFQETMEAMR              |                    | myosin, heavy polypeptide 9, non-muscle [Mus musculus]                                              | 1388.5675 | 30.45  | 1.535778082 |
| 6755626  | DMLYQVLAEEEEPSVR         |                    | sepiapterin reductase [Mus musculus]                                                                | 1720.8597 | 50.76  | 1.098106876 |
| 21450277 | DMTSEELDLR               |                    | Na+/K+ -ATPase alpha 1 subunit [Mus musculus]                                                       | 1436.6592 | 45.55  | 1.174477905 |
| 8567336  | DMVTQASPYLFEATGK         |                    | chloride channel calcium activated 3 [Mus musculus]                                                 | 1757.8477 | 98.59  | 0.354127862 |
| 8567336  | DMVTQASPYLFEATGK         | Oxidation (M)      | chloride channel calcium activated 3 [Mus musculus]                                                 | 1773.8328 | 69.15  | 0           |
| 8567336  | DNCVFPDPHQNEK            |                    | chloride channel calcium activated 3 [Mus musculus]                                                 | 1641.7434 | 80.45  | 0.136042175 |
| 6681219  | DNFTAPEGTNGVEER          |                    | dihydropyrimidinase-like 3 [Mus musculus]                                                           | 1748.8147 | 60.8   | 1.560578644 |
| 40254595 | DNFTLIPEGTNGTEER         |                    | dihydropyrimidinase-like 2 [Mus musculus]                                                           | 1792.8273 | 54.31  | 1.245241376 |
| 21361209 | DNIQGITKPAIR             |                    | germinal histone H4 [Mus musculus]                                                                  | 1325.7654 | 70.56  | 0.691764922 |
| 33563250 | DNLIDDLQR                |                    | desmin [Mus musculus]                                                                               | 1101.5559 | 54.6   | 0.677391023 |
| 29789080 | DNNQFASASLDR             |                    | coatamer protein complex, subunit beta 2 (beta prime) [Mus musculus]                                | 1337.6088 | 30.2   | 1.51692704  |
| 6678483  | DNPGVVTCLDEAR            |                    | ubiquitin-activating enzyme E1, Chr X [Mus musculus]                                                | 1388.6544 | 26.6   | 0           |
| 23621467 | DNTINLIHTR               |                    | PREDICTED: actin related protein 2/3 complex, subunit 2 [Mus musculus]                              | 1343.7095 | 41.58  | 1.979442771 |
| 31543942 | DPNASPGDAGEQAIR          |                    | vinculin [Mus musculus]                                                                             | 1497.7013 | 81.35  | 0.696391843 |
| 31982437 | DPQLVPILIDAR             |                    | NAD(P) dependent steroid dehydrogenase-like [Mus musculus]                                          | 1420.8073 | 23.78  | 0           |
| 6755809  | DPVQLNLLYVQAR            |                    | talin 1 [Mus musculus]                                                                              | 1528.8441 | 46.11  | 0           |
| 6680572  | DQDNMQAELNR              |                    | kinesin family member 5B [Mus musculus]                                                             | 1333.589  | 34.01  | 2.23429805  |
| 63481281 | DQDVEPGAPSMGAK           |                    | PREDICTED: glutamyl-prolyl-tRNA synthetase [Mus musculus]                                           | 1401.6346 | 53.28  | 0           |
| 31980648 | DQEGQDVLFFIDNIFR         |                    | ATP synthase, H+ transporting mitochondrial F1 complex, beta subunit [Mus musculus]                 | 1921.9677 | 55.18  | 1.424137773 |
| 33620739 | DQGTIEDYEGELR            |                    | myosin, light polypeptide 6, alkali, smooth muscle and non-muscle [Mus musculus]                    | 1544.6912 | 44.98  | 1.024143961 |
| 6754556  | DQMQLSDYQLLDVK           |                    | lamin B1 [Mus musculus]                                                                             | 2080.9829 | 60     | 0           |
| 6754254  | DQVANSAFVER              |                    | heat shock protein 1, alpha [Mus musculus]                                                          | 1235.6061 | 71.44  | 2.3289529   |

|          |                         |                                                                                                     |           |        |             |
|----------|-------------------------|-----------------------------------------------------------------------------------------------------|-----------|--------|-------------|
| 6679058  | DSGQFTDEFLEPQR          | nidogen 2 [Mus musculus]                                                                            | 1668.7588 | 33.02  | 0           |
| 6753266  | DSISLSPEQLAQLR          | carbonic anhydrase 1 [Mus musculus]                                                                 | 1556.8344 | 70.03  | 7.886092213 |
| 6755040  | DSLLQDGEFTMDLR          | profilin 1 [Mus musculus]                                                                           | 1639.7693 | 80.78  | 1.9730787   |
| 6678682  | DSNNLCLHFNPR            | lectin, galactose binding, soluble 1 [Mus musculus]                                                 | 1429.6724 | 54.17  | 0.719690162 |
| 28916693 | DSQEEKTEALTSAK          | gelsolin [Mus musculus]                                                                             | 1665.7805 | 67.06  | 1.123610103 |
| 31543976 | DSTLIMQLLR              | 3-monooxygenase/tryptophan 5-monooxygenase activation protein, gamma polypeptide [Mus musculus]     | 1189.6665 | 66.12  | 1.189925243 |
| 31543974 | DSTLIMQLLR              | tyrosine 3-monooxygenase/tryptophan 5-monooxygenase activation protein, beta polypeptide [Mus muscu | 1189.6665 | 66.12  | 1.189925243 |
| 31981925 | DSTLIMQLLR              | tyrosine 3-monooxygenase/tryptophan 5-monooxygenase activation protein, epsilon polypeptide [Mus mu | 1189.6665 | 66.12  | 1.189925243 |
| 6756039  | DSTLIMQLLR              | tyrosine 3-monooxygenase/tryptophan 5-monooxygenase activation protein, theta polypeptide [Mus musc | 1189.6665 | 66.12  | 1.189925243 |
| 6756041  | DSTLIMQLLR              | tyrosine 3-monooxygenase/tryptophan 5-monooxygenase activation protein, zeta polypeptide [Mus muscu | 1189.6665 | 66.12  | 1.189925243 |
| 6753374  | DTANWLEINPETGAIFTR      | cadherin 1 [Mus musculus]                                                                           | 2048.0117 | 37.22  | 2.03498559  |
| 41322904 | DTHDQLSEPEVR            | plectin 1 isoform 1 [Mus musculus]                                                                  | 1512.7045 | 77.43  | 1.868147501 |
| 9790067  | DTNGENIAESLVAEGLATR     | staphylococcal nuclease domain containing 1 [Mus musculus]                                          | 1959.9623 | 93.5   | 1.029538487 |
| 6755142  | DTNGSQFFITTVK           | peptidylprolyl isomerase B [Mus musculus]                                                           | 1457.7267 | 58.93  | 0           |
| 6680163  | DTPGFIVNR               | L-3-hydroxyacyl-Coenzyme A dehydrogenase, short chain [Mus musculus]                                | 1018.5359 | 39.7   | 1.687557146 |
| 42476274 | DTPTQEDWLVSVLPEGSR      | X-prolyl aminopeptidase (aminopeptidase P) 1, soluble [Mus musculus]                                | 2028.9816 | 31.74  | 0           |
| 7305295  | DVASLGSQLQDQTQELLQEETR  | myosin, heavy polypeptide 11, smooth muscle [Mus musculus]                                          | 2360.1843 | 138.56 | 0           |
| 29150272 | DVAWAPSIGLPTSTIASCSQDGR | SEC13 related gene [Mus musculus]                                                                   | 2332.1245 | 32.9   | 1.593195282 |
| 63746482 | DVDIIDHHDNTYTVK         | PREDICTED: filamin, alpha [Mus musculus]                                                            | 1784.8405 | 31.29  | 0           |
| 6678726  | DVDPDVAYSSIPYEK         | leukotriene A4 hydrolase [Mus musculus]                                                             | 1697.8202 | 30.27  | 0           |
| 7305515  | DVGNGNGSGNGGGAFAFSQTR   | trans-acting transcription factor 1 [Mus musculus]                                                  | 1879.8306 | 29.82  | 0           |
| 7305515  | DVGNGNGSGNGGGAFAFSQTR   | trans-acting transcription factor 1 [Mus musculus]                                                  | 1880.8234 | 27.46  | 1.725718804 |
| 27804325 | DVPALEITHFLER           | monoamine oxidase A [Mus musculus]                                                                  | 1640.8677 | 23.98  | 2.166409566 |
| 51709169 | DVPNPNQVDDDDDEGFR       | PREDICTED: similar to 80 kDa nuclear cap binding protein (NCBP 80 kDa subunit) (CBP80) [Mus muscu   | 1831.7888 | 30.14  | 0           |
| 7304885  | DVQELYAAGENR            | annexin A11 [Mus musculus]                                                                          | 1364.6433 | 28.81  | 0           |
| 24429590 | DVVLAYPEVR              | DEAH (Asp-Glu-Ala-His) box polypeptide 9 [Mus musculus]                                             | 1160.6285 | 37.68  | 3.674227215 |
| 20532346 | DVYEDELVPVFETVGR        | hypothetical protein LOC245945 [Mus musculus]                                                       | 1866.915  | 48.47  | 2.758916706 |
| 51467513 | DXSHYFKTIQDLR           | PREDICTED: similar to Keratin, type I cytoskeletal 18 (Cytokeratin 18) (K18) (CK 18) [Homo sapiens] | 1708.8495 | 47.59  | 0           |
| 6754220  | DYFEQYQK                | heterogeneous nuclear ribonucleoprotein A1 [Mus musculus]                                           | 1049.4636 | 34.71  | 1.217849168 |
| 27369998 | DYFLFNPVTDIEIIR         | calcium-binding transporter [Mus musculus]                                                          | 1984.016  | 62.75  | 2.519092888 |
| 13384736 | DYIPVDQEELR             | dynein, cytoplasmic, heavy chain 1 [Mus musculus]                                                   | 1376.668  | 32.87  | 0.985104929 |
| 13385942 | DYIWNTLNSGR             | citrate synthase [Mus musculus]                                                                     | 1338.6522 | 57.26  | 1.473355335 |
| 7304887  | DYPGFSPSVDAAEAR         | annexin A3 [Mus musculus]                                                                           | 1623.7693 | 29.74  | 1.269670894 |
| 14149756 | DYTYEELLNR              | eukaryotic translation initiation factor 2, subunit 2 (beta) [Mus musculus]                         | 1315.6155 | 24.08  | 0           |
| 6755809  | EAAFHPEVAPDVR           | talin 1 [Mus musculus]                                                                              | 1437.7192 | 58.92  | 0.825553017 |
| 31982290 | EAAAYAPPASGNQHPGMPVSGPK | LIM domain containing preferred translocation partner in lipoma [Mus musculus]                      | 2440.1475 | 50.3   | 0           |
| 42415475 | EADDIVNWLK              | prolyl 4-hydroxylase, beta polypeptide [Mus musculus]                                               | 1202.6152 | 39.76  | 1.042916652 |
| 15426055 | EAELEPLMPAIR            | coatamer protein complex, subunit beta 1 [Mus musculus]                                             | 1481.8051 | 22.3   | 1.459994787 |
| 47578123 | EAEYFELPELVR            | potassium channel tetramerisation domain containing 12 [Mus musculus]                               | 1494.7455 | 29.86  | 0           |
| 63474405 | EAFEEMEGTSPSPSPHVAR     | PREDICTED: tensin [Mus musculus]                                                                    | 2144.96   | 52.79  | 0.781040902 |
| 63492583 | EAFNMIDQNR              | PREDICTED: myosin regulatory light polypeptide 9 [Mus musculus]                                     | 1237.5682 | 44.05  | 1.266712622 |
| 18152793 | EAINQGMDEELERDEK        | pyruvate dehydrogenase (lipoamide) beta [Mus musculus]                                              | 1905.8652 | 23.46  | 1.14395928  |
| 6679599  | EAINVEQAFQTIAR          | RAB7, member RAS oncogene family [Mus musculus]                                                     | 1589.8317 | 38.5   | 0           |
| 30409988 | EALNVFGDDYATEDGTGVR     | galactose-4-epimerase, UDP [Mus musculus]                                                           | 2028.9208 | 40.5   | 1.87032675  |
| 15808988 | EALTYDGALLGDR           | Williams-Beuren syndrome chromosome region 1 homolog [Mus musculus]                                 | 1393.6992 | 40.18  | 1.58104764  |
| 31981515 | EANNFLWPFK              | ribosomal protein L7 [Mus musculus]                                                                 | 1265.6323 | 50.48  | 1.066017971 |
| 6677799  | EAPPMKEPEVVK            | ribosomal protein S15 [Mus musculus]                                                                | 1353.7126 | 43.64  | 2.840373996 |
| 29336026 | EAQAGLAEAQEDLEAER       | nonmuscle myosin heavy chain [Mus musculus]                                                         | 1829.8575 | 48.79  | 1.397748577 |
| 7305395  | EAQIFDYNEIPFPQSTVQGHAGR | purine-nucleoside phosphorylase [Mus musculus]                                                      | 2718.2842 | 58.36  | 1.360776235 |
| 6679687  | EATNPPIIQEEKPK          | glucose regulated protein [Mus musculus]                                                            | 1593.8523 | 97.3   | 1.19333896  |
| 63746482 | EATTEFSVDAR             | PREDICTED: filamin, alpha [Mus musculus]                                                            | 1225.5706 | 68.19  | 0.812532818 |
| 12963539 | EAVLIDPVLETADR          | ETHE1 protein [Mus musculus]                                                                        | 1562.8641 | 31.88  | 0           |
| 6680748  | EAYPGDVFYLHSR           | ATP synthase, H+ transporting, mitochondrial F1 complex, alpha subunit, isoform 1 [Mus musculus]    | 1553.7457 | 77.53  | 1.345691766 |
| 63556656 | ECGILADPEGPFRR          | PREDICTED: RIKEN cDNA A430096B05 gene [Mus musculus]                                                | 1403.6625 | 40.74  | 0.310176326 |
| 63562740 | EDALMVELDSR             | PREDICTED: similar to secreted gel-forming mucin [Mus musculus]                                     | 1277.6083 | 45.91  | 1.026253911 |
| 46575903 | EDAPVGPLHQLQSMPEQIR     | eukaryotic translation initiation factor 3, subunit 10 (theta) [Mus musculus]                       | 1990.9688 | 25.05  | 1.025907254 |
| 6756033  | EDGNEEDKENQGDDETGGQPPQR | nuclease sensitive element binding protein 1 [Mus musculus]                                         | 2628.1067 | 139.69 | 1.284187461 |
| 29789191 | EDGTFYFEGDDIPEAPER      | asparaginyl-tRNA synthetase [Mus musculus]                                                          | 2086.9063 | 26.97  | 1.101352022 |
| 33859482 | EDLYLKIQR               | eukaryotic translation elongation factor 2 [Mus musculus]                                           | 1274.7175 | 39.93  | 2.612074454 |
| 6754254  | EDQTEYLEER              | heat shock protein 1, alpha [Mus musculus]                                                          | 1311.5753 | 62.72  | 1.728229389 |

Deamidation (NQ)

|          |                         |               |                                                                                                     |           |        |             |
|----------|-------------------------|---------------|-----------------------------------------------------------------------------------------------------|-----------|--------|-------------|
| 40556608 | EDQTEYLEER              |               | heat shock protein 1, beta [Mus musculus]                                                           | 1311.5753 | 62.72  | 1.728229389 |
| 31982755 | EEAESTLQSF              |               | vimentin [Mus musculus]                                                                             | 1296.6112 | 52.87  | 0.888859579 |
| 6755863  | EEEAQLDGLNASQIR         |               | tumor rejection antigen gp96 [Mus musculus]                                                         | 1785.9111 | 76.93  | 0           |
| 15617203 | EEFASTCPDDEEIELAYEQVAR  |               | chloride intracellular channel 1 [Mus musculus]                                                     | 2544.1262 | 59.45  | 1.252771578 |
| 21312994 | EEGVPTLWR               |               | solute carrier family 25 (mitochondrial carrier oxoglutarate carrier), member 11 [Mus musculus]     | 1086.5511 | 25.99  | 1.240695112 |
| 6753036  | EEIFGPVMQILK            |               | aldehyde dehydrogenase 2, mitochondrial [Mus musculus]                                              | 1403.7395 | 35.4   | 0.573309906 |
| 21312260 | EEIFGPVQPLFK            |               | aldehyde dehydrogenase 1 family, member B1 [Mus musculus]                                           | 1403.7585 | 25.48  | 0           |
| 63476037 | EELSSLKILPTSTGAGVGSK    |               | PREDICTED: procollagen, type VI, alpha 3 [Mus musculus]                                             | 2071.1282 | 41.32  | 0           |
| 6755863  | EESDDEAAVEEEEEKPK       |               | tumor rejection antigen gp96 [Mus musculus]                                                         | 2219.9744 | 86.59  | 0           |
| 31560222 | EESGAVAAAASVPAQSTAR     |               | PYD and CARD domain containing [Mus musculus]                                                       | 1772.8829 | 90.13  | 2.112000181 |
| 7710042  | EEVQAGVDAANSAQQYQR      |               | IQ motif containing GTPase activating protein 1 [Mus musculus]                                      | 2034.95   | 35.23  | 1.682676526 |
| 6679587  | EFADSLGIPFLETSK         |               | RAB1, member RAS oncogene family [Mus musculus]                                                     | 1724.8763 | 58.87  | 0           |
| 31542159 | EFDDLSPQQR              |               | ATPase, Ca++ transporting, ubiquitous [Mus musculus]                                                | 1363.6304 | 43.08  | 2.339232609 |
| 6806903  | EFDELSPSAQR             |               | ATPase, Ca++ transporting, cardiac muscle, slow twitch 2 [Mus musculus]                             | 1278.6044 | 56.6   | 1.36171662  |
| 21704156 | EFDPTITDGSLSGPSR        |               | caldesmon 1 [Mus musculus]                                                                          | 1678.7949 | 78.12  | 0.99399892  |
| 51491880 | EFEEESKQPGVSEQQR        |               | metastasis-associated protein 2 [Mus musculus]                                                      | 1906.8868 | 51.66  | 0.936624819 |
| 31982275 | EFISITDVVPYISLR         |               | heat shock protein 4 [Mus musculus]                                                                 | 1735.9281 | 46.87  | 1.65439844  |
| 21426821 | EGDVLTLLESER            |               | ribosomal protein S28 [Mus musculus]                                                                | 1360.7057 | 61.91  | 1.028510452 |
| 63594458 | EGDYFTQQGEFR            |               | PREDICTED: source of immunodominant MHC-associated peptides [Mus musculus]                          | 1476.6497 | 51.8   | 1.050190298 |
| 33859482 | EGIPALDNFLDKL           |               | eukaryotic translation elongation factor 2 [Mus musculus]                                           | 1444.7664 | 84.3   | 1.283836016 |
| 6754254  | EGLELPEDEEEKK           |               | heat shock protein 1, alpha [Mus musculus]                                                          | 1672.7954 | 35.45  | 0           |
| 40556608 | EGLELPEDEEEKK           |               | heat shock protein 1, beta [Mus musculus]                                                           | 1672.7954 | 35.45  | 0           |
| 6679439  | EGMNIVEAMER             |               | peptidylprolyl isomerase A [Mus musculus]                                                           | 1278.5895 | 57.79  | 1.277044716 |
| 63650244 | EGMNIVEAMER             |               | PREDICTED: similar to Peptidyl-prolyl cis-trans isomerase A (PPIase) (Rotamase) (Cyclophilin A) (Cy | 1278.5895 | 57.79  | 1.277044716 |
| 31981549 | EGNALFTFPNTPVK          |               | sulfide quinone reductase-like [Mus musculus]                                                       | 1534.7935 | 26.83  | 1.599130727 |
| 31980648 | EGNDLYHEMIESGVINLK      |               | ATP synthase, H+ transporting mitochondrial F1 complex, beta subunit [Mus musculus]                 | 2061.0042 | 96.29  | 2.493154505 |
| 63746482 | EGSYSISVLYGEEVPR        |               | PREDICTED: filamin, alpha [Mus musculus]                                                            | 1913.9089 | 44.36  | 1.053481482 |
| 6753882  | EGTGTETPMIGDR           |               | FK506 binding protein 4 [Mus musculus]                                                              | 1363.6234 | 32.97  | 0           |
| 18079339 | EGWPLDIR                |               | aconitase 2, mitochondrial [Mus musculus]                                                           | 985.5092  | 42.83  | 1.634486593 |
| 12963527 | EHNGQVTGIDWAPESNR       |               | actin related protein 2/3 complex, subunit 1B [Mus musculus]                                        | 1909.8871 | 60.6   | 1.114961442 |
| 51592084 | EIEIAEQEMPALMALR        |               | hypothetical protein LOC74340 [Mus musculus]                                                        | 1843.9252 | 32.06  | 1.995422848 |
| 26986563 | EIFAQALAPFR             |               | choline dehydrogenase [Mus musculus]                                                                | 1391.7301 | 29.5   | 15.69436739 |
| 7305085  | EIFEQPESVNTMR           |               | glutamine fructose-6-phosphate transaminase 1 [Mus musculus]                                        | 1678.8193 | 62.03  | 1.504668478 |
| 6755901  | EIIDLVDR                |               | tubulin, alpha 1 [Mus musculus]                                                                     | 1085.6199 | 38.52  | 1.130250138 |
| 34740335 | EIIDLVDR                |               | tubulin, alpha 2 [Mus musculus]                                                                     | 1085.6199 | 38.52  | 1.130250138 |
| 6678469  | EIIDLVDR                |               | tubulin, alpha 6 [Mus musculus]                                                                     | 1085.6199 | 38.52  | 1.130250138 |
| 6680924  | EILVGDVGGTVDPPYTFVK     |               | cofilin 1, non-muscle [Mus musculus]                                                                | 2196.1125 | 57.31  | 0           |
| 27804325 | EIPVDAPWQAR             |               | monoamine oxidase A [Mus musculus]                                                                  | 1281.6617 | 50.82  | 2.509552517 |
| 6671507  | EITALAPSTMK             |               | actin, alpha 2, smooth muscle, aorta [Mus musculus]                                                 | 1161.6219 | 73.57  | 0.795753565 |
| 6671509  | EITALAPSTMK             |               | actin, beta, cytoplasmic [Mus musculus]                                                             | 1161.6219 | 73.57  | 0.795753565 |
| 63652452 | EITALAPSTMK             |               | PREDICTED: similar to cytoplasmic beta-actin [Mus musculus]                                         | 1161.6219 | 73.57  | 0.795753565 |
| 6671507  | EITALAPSTMK             | Oxidation (M) | actin, alpha 2, smooth muscle, aorta [Mus musculus]                                                 | 1177.606  | 22.88  | 0           |
| 6671509  | EITALAPSTMK             | Oxidation (M) | actin, beta, cytoplasmic [Mus musculus]                                                             | 1177.606  | 22.88  | 0           |
| 63652452 | EITALAPSTMK             | Oxidation (M) | PREDICTED: similar to cytoplasmic beta-actin [Mus musculus]                                         | 1177.606  | 22.88  | 0           |
| 12963615 | EIVHIQAGCCGNQIGAK       |               | tubulin, beta 3 [Mus musculus]                                                                      | 1765.9036 | 41.15  | 0           |
| 7106439  | EIVHIQAGCCGNQIGAK       |               | tubulin, beta 5 [Mus musculus]                                                                      | 1765.9036 | 41.15  | 0           |
| 21746161 | EIVHIQAGCCGNQIGAK       |               | tubulin, beta [Mus musculus]                                                                        | 1765.9036 | 41.15  | 0           |
| 7949051  | EKPYFPIPEDCTFIQNVPLEDR  |               | heterogenous nuclear ribonucleoprotein U [Mus musculus]                                             | 2650.2869 | 35.41  | 1.560941651 |
| 6755372  | ELAEDGYSGVEVR           |               | ribosomal protein S3 [Mus musculus]                                                                 | 1423.6747 | 54.32  | 1.55868662  |
| 51712562 | ELAPYDENWFYTR           |               | PREDICTED: similar to ribosomal protein S19 [Mus musculus]                                          | 1703.7775 | 57.59  | 1.182498341 |
| 6681157  | ELAQQVQVAAEYCR          |               | DEAD (Asp-Glu-Ala-Asp) box polypeptide 5 [Mus musculus]                                             | 1735.8402 | 19.22  | 1.501385543 |
| 24429590 | ELDALDANDELTPLGR        |               | DEAH (Asp-Glu-Ala-His) box polypeptide 9 [Mus musculus]                                             | 1741.8639 | 55.75  | 0.835092577 |
| 7305295  | ELDEATESNEAMGR          |               | myosin, heavy polypeptide 11, smooth muscle [Mus musculus]                                          | 1551.6761 | 45.1   | 0           |
| 19482160 | ELEEDFIR                |               | coactosin-like 1 [Mus musculus]                                                                     | 1050.5161 | 36.06  | 0.850258053 |
| 6677813  | ELEFYLR                 |               | ribosomal protein S8 [Mus musculus]                                                                 | 969.5036  | 36.2   | 1.462961505 |
| 7305295  | ELEGHISDLQEDLDSER       |               | myosin, heavy polypeptide 11, smooth muscle [Mus musculus]                                          | 1984.9204 | 113.75 | 0.906961703 |
| 20137006 | ELETQISELQEDLESER       |               | myosin, heavy polypeptide 9, non-muscle [Mus musculus]                                              | 2047.9722 | 102.62 | 1.316719813 |
| 63476037 | ELGTIQQVISER            |               | PREDICTED: procollagen, type VI, alpha 3 [Mus musculus]                                             | 1372.7444 | 62.62  | 0.881178443 |
| 13385878 | ELILSSEPSPAVTPVPTTLIAPR |               | sorting nexin 2 [Mus musculus]                                                                      | 2489.3777 | 53.48  | 2.838426337 |
| 13386054 | ELLQPVTISR              |               | actin related protein 2/3 complex, subunit 4 [Mus musculus]                                         | 1268.7592 | 24.22  | 1.238508298 |

|          |                                 |                    |                                                                                                  |           |        |             |
|----------|---------------------------------|--------------------|--------------------------------------------------------------------------------------------------|-----------|--------|-------------|
| 6679687  | ELNDFISYLQR                     |                    | glucose regulated protein [Mus musculus]                                                         | 1397.7157 | 84.94  | 1.071328389 |
| 11230802 | ELPPDQAEYCIAR                   |                    | actinin alpha 4 [Mus musculus]                                                                   | 1504.7156 | 43.89  | 0           |
| 33563250 | ELQAQLQEQQVQVEMDMSPDLTAALR      |                    | desmin [Mus musculus]                                                                            | 3099.5347 | 52.53  | 0.670808552 |
| 30023842 | ELQELVQYPVEHPDK                 |                    | valosin containing protein [Mus musculus]                                                        | 1823.9209 | 63.24  | 0           |
| 13624315 | ELQSQISDTSVVLSDMNSR             |                    | keratin complex 2, basic, gene 8 [Mus musculus]                                                  | 2109.0198 | 140.63 | 1.853730433 |
| 63565108 | ELQSQISDTSVVLSDMNSR             |                    | PREDICTED: similar to cytokeratin EndoA - mouse [Mus musculus]                                   | 2109.0198 | 140.63 | 1.853730433 |
| 31981748 | ELSLASNELKDEGAR                 |                    | ribonuclease/angiogenin inhibitor 1 [Mus musculus]                                               | 1631.8119 | 25.73  | 2.364007873 |
| 29336026 | ELSSAESQLHDTQELLQEETR           |                    | nonmuscle myosin heavy chain [Mus musculus]                                                      | 2443.1567 | 40.03  | 0           |
| 31982755 | EMEENFALEAANYQDTIGR             |                    | vimentin [Mus musculus]                                                                          | 2200.9888 | 102.26 | 0           |
| 7305295  | EMEGLSQQYEEK                    |                    | myosin, heavy polypeptide 11, smooth muscle [Mus musculus]                                       | 1470.6537 | 62.83  | 1.407875239 |
| 6671666  | EMNDAAMFYTNR                    |                    | CAP, adenylate cyclase-associated protein 1 [Mus musculus]                                       | 1462.6216 | 33.27  | 1.310662261 |
| 7305295  | ENADLAGELR                      |                    | myosin, heavy polypeptide 11, smooth muscle [Mus musculus]                                       | 1087.5403 | 74.44  | 0.793013598 |
| 31560680 | ENDYYTPTGEFR                    |                    | integral membrane protein 1 [Mus musculus]                                                       | 1491.647  | 66.87  | 1.17711637  |
| 21450129 | ENGTITAAANASTLNDGAAALVLMTAEAAQR |                    | acetyl-Coenzyme A acetyltransferase 1 precursor [Mus musculus]                                   | 2945.4478 | 47.94  | 1.516306308 |
| 31982522 | ENLLGEPGMGFK                    |                    | acyl-Coenzyme A dehydrogenase, short chain [Mus musculus]                                        | 1291.6333 | 32.13  | 1.161425772 |
| 22267442 | ENMAYTVEGIR                     |                    | ubiquinol cytochrome c reductase core protein 2 [Mus musculus]                                   | 1282.6082 | 26.87  | 0           |
| 6754508  | EPAAPVSIQR                      |                    | LIM and SH3 protein 1 [Mus musculus]                                                             | 1067.5874 | 23.48  | 1.012870434 |
| 33469029 | EPGEAAAEGAAEEAR                 |                    | acyl-Coenzyme A binding domain containing 3 [Mus musculus]                                       | 1457.6556 | 60.61  | 1.313486083 |
| 31982290 | EPIMPAPGQEETVR                  |                    | LIM domain containing preferred translocation partner in lipoma [Mus musculus]                   | 1553.7703 | 68.32  | 1.414915559 |
| 31981657 | EPITVSSEQMSHFR                  |                    | carbonic anhydrase 2 [Mus musculus]                                                              | 1647.7902 | 113.71 | 2.548636147 |
| 13385268 | EQAGGDATENFEDVGHSTDAR           |                    | cytochrome b-5 [Mus musculus]                                                                    | 2205.9436 | 67.92  | 0           |
| 13385728 | EQEAEPEEQEEDSSSDPR              |                    | microfibrillar-associated protein 1 [Mus musculus]                                               | 2090.8313 | 54.72  | 0           |
| 6680836  | EQFLDGDAWTNR                    |                    | calreticulin [Mus musculus]                                                                      | 1451.6637 | 99.56  | 1.04195356  |
| 22094075 | EQGVLFSFWR                      |                    | solute carrier family 25, member 5 [Mus musculus]                                                | 1121.5804 | 61.6   | 1.784203709 |
| 50355690 | EQIVPKPEEEVAQK                  |                    | ribosomal protein L17 [Mus musculus]                                                             | 1623.8651 | 65.71  | 0           |
| 6678499  | EQIVVDLSDHPGVSADDQVSR           |                    | UDP-glucose dehydrogenase [Mus musculus]                                                         | 2151.0769 | 65.75  | 2.854626256 |
| 21450277 | EQPLDEELKDAFQNAYLELGGGLGER      |                    | Na+/K+ -ATPase alpha 1 subunit [Mus musculus]                                                    | 2834.3835 | 114.5  | 1.621053021 |
| 13384736 | EQPWVSVQPR                      |                    | dynein, cytoplasmic, heavy chain 1 [Mus musculus]                                                | 1225.6394 | 22.58  | 0           |
| 13591862 | EQQEAIEHIDEVQNEIDR              |                    | SET translocation [Mus musculus]                                                                 | 2195.0234 | 45.8   | 1.038230658 |
| 18700024 | EQTEGEYSLSLEHESAK               |                    | isocitrate dehydrogenase 3, beta subunit [Mus musculus]                                          | 1823.8037 | 46.71  | 1.216669554 |
| 40556608 | EQVANSAFVER                     |                    | heat shock protein 1, beta [Mus musculus]                                                        | 1249.6182 | 47.02  | 2.266521683 |
| 39930557 | EQVNLMAAINELNVR                 | 2 Deamidation (NQ) | A kinase (PRKA) anchor protein (yotiao) 9 [Mus musculus]                                         | 1829.8816 | 22.3   | 0.885578005 |
| 6678752  | ESPYDHQSLQALQEAFTSR             |                    | lymphocyte antigen 74 [Mus musculus]                                                             | 2308.085  | 20.45  | 1.381235578 |
| 6754994  | ESTGAQVQVAGDMLPNSTER            |                    | poly(rC) binding protein 1 [Mus musculus]                                                        | 2089.9912 | 104.44 | 1.249973549 |
| 42734399 | ESVQLYEDEVR                     |                    | desmuslin isoform H [Mus musculus]                                                               | 1366.6575 | 23.95  | 0.937193063 |
| 9910482  | ESVQVPDDQDFR                    |                    | START domain containing 10 [Mus musculus]                                                        | 1434.6688 | 37.33  | 1.533046566 |
| 20874851 | ESYSVYVYK                       |                    | PREDICTED: similar to histone H2b-616 [Mus musculus]                                             | 1137.547  | 39.1   | 0           |
| 6754484  | ETMQFLNDR                       |                    | keratin complex 1, acidic, gene 1 [Mus musculus]                                                 | 1153.5388 | 21.09  | 0           |
| 31982223 | ETPSWTGPGFVR                    |                    | laminin, beta 2 [Mus musculus]                                                                   | 1333.6576 | 20.07  | 0.603971562 |
| 63492203 | ETSYEEALANQR                    |                    | PREDICTED: ribosome binding protein 1 [Mus musculus]                                             | 1410.6593 | 52.05  | 1.614954655 |
| 30023842 | ETVVEVPQVTWEDIGGLEDVKR          |                    | valosin containing protein [Mus musculus]                                                        | 2498.2646 | 67.83  | 0           |
| 6680748  | EVAFAQFGSDLDAATQQLLSR           |                    | ATP synthase, H+ transporting, mitochondrial F1 complex, alpha subunit, isoform 1 [Mus musculus] | 2338.1721 | 125.18 | 1.350338536 |
| 31560449 | EVAGQVGVPLQDLNVR                |                    | aspartyl aminopeptidase [Mus musculus]                                                           | 1710.9169 | 32.68  | 1.079962678 |
| 22208854 | EVAYLGNEVSDEECLKR               |                    | cytidine monophospho-N-acetylneuraminic acid synthetase [Mus musculus]                           | 1953.9417 | 21.1   | 2.525927526 |
| 30348966 | EVDDLEQWIAER                    |                    | spectrin beta 2 isoform 1 [Mus musculus]                                                         | 1502.724  | 33.52  | 1.634172209 |
| 63650229 | EVDEQMLNVQNK                    |                    | PREDICTED: similar to TUBULIN BETA CHAIN (T BETA-15) [Mus musculus]                              | 1446.7034 | 60.54  | 1.204493532 |
| 22165384 | EVDEQMLNVQNK                    |                    | tubulin, beta, 2 [Mus musculus]                                                                  | 1446.7034 | 60.54  | 1.204493532 |
| 7106439  | EVDEQMLNVQNK                    |                    | tubulin, beta 5 [Mus musculus]                                                                   | 1446.7034 | 60.54  | 1.204493532 |
| 21746161 | EVDEQMLNVQNK                    |                    | tubulin, beta [Mus musculus]                                                                     | 1446.7034 | 60.54  | 1.204493532 |
| 30023842 | EVDIGIPDATGR                    |                    | valosin containing protein [Mus musculus]                                                        | 1242.635  | 60.95  | 1.382322343 |
| 12963527 | EVEERPAPTPWGSK                  |                    | actin related protein 2/3 complex, subunit 1B [Mus musculus]                                     | 1582.7936 | 26.3   | 0.976962787 |
| 14149756 | EVEPEPTEEKDVDADEEDSR            |                    | eukaryotic translation initiation factor 2, subunit 2 (beta) [Mus musculus]                      | 2317.9822 | 115.56 | 1.721693207 |
| 46593021 | EVESIGAHLNAYSTR                 |                    | ubiquinol-cytochrome c reductase core protein 1 [Mus musculus]                                   | 1646.8226 | 34.61  | 2.791851359 |
| 31543315 | EVFEDAMEIR                      |                    | nucleolin [Mus musculus]                                                                         | 1238.5793 | 38.49  | 1.553483161 |
| 31980685 | EVGAFGTPVINLQTR                 |                    | glucosamine [Mus musculus]                                                                       | 1530.8274 | 44.52  | 1.851794904 |
| 7106435  | EVIVGPDTSYSLADLSPSTHYSAR        |                    | tenascin C [Mus musculus]                                                                        | 2666.2922 | 28.04  | 1.366954474 |
| 7305295  | EVLLQVEDER                      |                    | myosin, heavy polypeptide 11, smooth muscle [Mus musculus]                                       | 1229.6368 | 19.1   | 0           |
| 6678573  | EVQGNESFTFR                     |                    | villin 1 [Mus musculus]                                                                          | 1295.5946 | 21.87  | 1.638677047 |
| 21450129 | EVYMGVNIQGGEGQAPTR              |                    | acetyl-Coenzyme A acetyltransferase 1 precursor [Mus musculus]                                   | 1905.922  | 93.61  | 1.48107968  |
| 31560611 | EWIEGVTGR                       |                    | calponin 1 [Mus musculus]                                                                        | 1046.5333 | 49.93  | 0.54207268  |



|          |                              |                  |                                                                              |           |        |             |
|----------|------------------------------|------------------|------------------------------------------------------------------------------|-----------|--------|-------------|
| 33563250 | EYQDLLNVK                    |                  | desmin [Mus musculus]                                                        | 1121.5824 | 49     | 0           |
| 34328368 | EYQDLLNVK                    |                  | internexin neuronal intermediate filament protein, alpha [Mus musculus]      | 1121.5824 | 49     | 0           |
| 46275814 | EYQDLLNVK                    |                  | neurofilament, heavy polypeptide [Mus musculus]                              | 1121.5824 | 49     | 0           |
| 31982755 | EYQDLLNVK                    |                  | vimentin [Mus musculus]                                                      | 1121.5824 | 49     | 0           |
| 41054806 | EYQLNDSAAYYLNDLER            |                  | guanine nucleotide binding protein, alpha inhibiting 2 [Mus musculus]        | 2076.9604 | 43.06  | 1.060430265 |
| 63635087 | EYSSELNAPSQESDSSHPR          |                  | PREDICTED: RNA binding motif protein 25 [Mus musculus]                       | 2032.8898 | 73.92  | 1.664077833 |
| 31560560 | FAAATGATPIAGR                |                  | laminin receptor 1 (ribosomal protein SA) [Mus musculus]                     | 1203.6522 | 60.7   | 1.377006512 |
| 31982755 | FADLSEAANR                   |                  | vimentin [Mus musculus]                                                      | 1093.5325 | 54.79  | 1.137617975 |
| 31560613 | FAEAFEAIPIR                  |                  | chaperonin subunit 8 (theta) [Mus musculus]                                  | 1150.59   | 26.1   | 1.637345274 |
| 6753240  | FAMEPEEFDSDTLR               |                  | calcium binding protein, intestinal [Mus musculus]                           | 1686.7351 | 74.69  | 0.882522964 |
| 21704206 | FAPPEAPEPWSGVR               |                  | carboxylesterase 2 [Mus musculus]                                            | 1539.7645 | 32.74  | 2.310633706 |
| 27370126 | FAPPEAPEPWSGVR               |                  | carboxylesterase 5 [Mus musculus]                                            | 1539.7645 | 32.74  | 2.310633706 |
| 33563250 | FASEANGYQDNIAR               |                  | desmin [Mus musculus]                                                        | 1555.7178 | 105.98 | 0.618934088 |
| 33563250 | FASEANGYQDNIAR               | Deamidation (NQ) | desmin [Mus musculus]                                                        | 1556.7059 | 73.76  | 1.049208403 |
| 63476037 | FASEIVDTVYEDGDSIR            |                  | PREDICTED: procollagen, type VI, alpha 3 [Mus musculus]                      | 1915.8905 | 55.87  | 0           |
| 31560611 | FASQQGMTAYGTR                |                  | calponin 1 [Mus musculus]                                                    | 1417.6675 | 107.69 | 0.916420337 |
| 6679299  | FDAGELITQR                   |                  | prohibitin [Mus musculus]                                                    | 1149.5857 | 22.25  | 1.510276892 |
| 31980685 | FDALALATSAAALMNIR            |                  | glucosamine [Mus musculus]                                                   | 1677.8997 | 25.11  | 1.136327128 |
| 6678573  | FDALTMHVQPQVAAQKQ            |                  | villin 1 [Mus musculus]                                                      | 1911.9772 | 76.51  | 1.963677272 |
| 63638100 | FDGALNVDLTFEQTNLVPYPR        |                  | PREDICTED: similar to tubulin, alpha 1 [Mus musculus]                        | 2409.2056 | 60.81  | 1.488576928 |
| 6755901  | FDGALNVDLTFEQTNLVPYPR        |                  | tubulin, alpha 1 [Mus musculus]                                              | 2409.2056 | 60.81  | 1.488576928 |
| 34740335 | FDGALNVDLTFEQTNLVPYPR        |                  | tubulin, alpha 2 [Mus musculus]                                              | 2409.2056 | 60.81  | 1.488576928 |
| 6678467  | FDGALNVDLTFEQTNLVPYPR        |                  | tubulin, alpha 4 [Mus musculus]                                              | 2409.2056 | 60.81  | 1.488576928 |
| 6678469  | FDGALNVDLTFEQTNLVPYPR        |                  | tubulin, alpha 6 [Mus musculus]                                              | 2409.2056 | 60.81  | 1.488576928 |
| 6677805  | FDGNLNCMTGGANLGR             |                  | ribosomal protein S4, X-linked [Mus musculus]                                | 1725.8112 | 35.3   | 1.550173895 |
| 21704020 | FEAPLFNAR                    |                  | NADH dehydrogenase (ubiquinone) Fe-S protein 1 [Mus musculus]                | 1064.5706 | 27.27  | 1.429089092 |
| 6679439  | FEDENFILK                    |                  | peptidylprolyl isomerase A [Mus musculus]                                    | 1154.5732 | 56.44  | 1.09927484  |
| 10092608 | FEDGDLTLYQSNAILR             |                  | glutathione S-transferase, pi 1 [Mus musculus]                               | 1854.9027 | 101.64 | 1.573953642 |
| 31981690 | FEELNADLFR                   |                  | heat shock protein 8 [Mus musculus]                                          | 1253.62   | 62.29  | 1.554757872 |
| 31981722 | FEELNMDLFR                   |                  | heat shock 70kD protein 5 (glucose-regulated protein) [Mus musculus]         | 1313.6305 | 27.1   | 1.098449389 |
| 9790073  | FEEQVYNIPIR                  |                  | cadherin 17 [Mus musculus]                                                   | 1407.7323 | 52.31  | 1.895830804 |
| 13385374 | FEIWDTAGQER                  |                  | RAB5A, member RAS oncogene family [Mus musculus]                             | 1351.6365 | 35.94  | 1.143830256 |
| 29789257 | FEIWDTAGQER                  |                  | RAB5C, member RAS oncogene family [Mus musculus]                             | 1351.6365 | 35.94  | 1.143830256 |
| 31981690 | FELTGIPPAPR                  |                  | heat shock protein 8 [Mus musculus]                                          | 1197.6589 | 26.89  | 1.679664631 |
| 30348966 | FESLEPEMNNQASR               |                  | spectrin beta 2 isoform 1 [Mus musculus]                                     | 1651.7472 | 22.4   | 1.461129231 |
| 6678483  | FEVQGLQPNGEEMTLK             |                  | ubiquitin-activating enzyme E1, Chr X [Mus musculus]                         | 1819.8656 | 24.61  | 1.047622178 |
| 6678145  | FFDEESYSLLR                  |                  | signal sequence receptor, delta [Mus musculus]                               | 1405.6532 | 65.85  | 1.825416354 |
| 8567336  | FFTAFDANGR                   |                  | chloride channel calcium activated 3 [Mus musculus]                          | 1145.5439 | 47.29  | 0.340466696 |
| 8567336  | FFTAFDANGR                   | Deamidation (NQ) | chloride channel calcium activated 3 [Mus musculus]                          | 1146.5366 | 29.89  | 0           |
| 63746482 | FGGEHVPNSPFQVTALAGDQPTVQTPLR |                  | PREDICTED: filamin, alpha [Mus musculus]                                     | 2963.4971 | 44.58  | 0.750765239 |
| 21704096 | FGGNPGGFGNQGGFGNSR           |                  | TAR DNA binding protein isoform 1 [Mus musculus]                             | 1726.7775 | 48.02  | 1.564847476 |
| 13384736 | FGNPLLVQDVESYDVPVLPVLR       |                  | dynein, cytoplasmic, heavy chain 1 [Mus musculus]                            | 2598.3457 | 25.17  | 1.119906302 |
| 40538823 | FGQKGTLMR                    |                  | GLI-Kruppel family member HKR1 [Mus musculus]                                | 1037.5421 | 26.83  | 0           |
| 31981562 | FGVEQDVMVFASFIR              |                  | pyruvate kinase 3 [Mus musculus]                                             | 1859.91   | 49.39  | 1.709570401 |
| 27413160 | FHQLDIDDPQSIR                |                  | carbonyl reductase 3 [Mus musculus]                                          | 1583.7878 | 28.95  | 0           |
| 6671690  | FHQLDIDNPQSIR                |                  | carbonyl reductase 1 [Mus musculus]                                          | 1582.8038 | 61.4   | 1.961359143 |
| 52317152 | FIEGPVTYSEAPR                |                  | phospholipase A2, group IVC (cytosolic, calcium-independent) [Mus musculus]  | 1465.7318 | 26.17  | 0           |
| 6678097  | FIEWTR                       |                  | serine (or cysteine) proteinase inhibitor, clade B, member 6a [Mus musculus] | 851.4426  | 33.84  | 1.477410397 |
| 6679687  | FISDKDASVVGFFR               |                  | glucose regulated protein [Mus musculus]                                     | 1587.8179 | 34.26  | 1.746464557 |
| 18079339 | FKLEAPDADELPR                |                  | aconitase 2, mitochondrial [Mus musculus]                                    | 1500.7715 | 54.47  | 1.547531498 |
| 33563250 | FLEQQNAALAAEVNR              |                  | desmin [Mus musculus]                                                        | 1673.8616 | 87.92  | 0           |
| 6678643  | FLEQQNKVLQTK                 |                  | keratin complex 2, basic, gene 1 [Mus musculus]                              | 1475.7935 | 70.04  | 0           |
| 6755740  | FLESLEPEEQQR                 |                  | upstream binding transcription factor, RNA polymerase I [Mus musculus]       | 1504.7225 | 24.61  | 0           |
| 31981246 | FLIDGFPR                     |                  | UMP-CMP Kinase [Mus musculus]                                                | 964.5211  | 34.59  | 1.479196868 |
| 29336026 | FLTNGPSSSPGQER               |                  | nonmuscle myosin heavy chain [Mus musculus]                                  | 1476.7122 | 76.03  | 2.063359401 |
| 30348966 | FMELLEPLSER                  |                  | spectrin beta 2 isoform 1 [Mus musculus]                                     | 1363.7058 | 19.61  | 0           |
| 13384828 | FMTEDTTDAPFR                 |                  | serine (or cysteine) proteinase inhibitor, clade B, member 1a [Mus musculus] | 1430.6307 | 59.84  | 1.213611055 |
| 6671622  | FNASQLITQR                   |                  | B-cell receptor-associated protein 37 [Mus musculus]                         | 1177.6294 | 49.06  | 1.420265328 |
| 63540743 | FNDEHIPDSPFVVPVAVSLSDAR      |                  | PREDICTED: filamin C, gamma [Mus musculus]                                   | 2527.2151 | 44.22  | 0.592599093 |
| 63660302 | FNDEHIPDSPYLPVVIAPSDAR       |                  | PREDICTED: filamin B, beta [Mus musculus]                                    | 2567.2388 | 53.97  | 1.395124575 |

|          |                        |                  |                                                                                                     |           |        |             |
|----------|------------------------|------------------|-----------------------------------------------------------------------------------------------------|-----------|--------|-------------|
| 63746482 | FNEEHIPDPPFVVPVSPSGDAR |                  | PREDICTED: filamin, alpha [Mus musculus]                                                            | 2467.1951 | 96.74  | 0.620686138 |
| 63746482 | FNGTHIPGSPFK           |                  | PREDICTED: filamin, alpha [Mus musculus]                                                            | 1301.649  | 40.13  | 0.676761724 |
| 18079339 | FNPETDFLTGK            |                  | aconitase 2, mitochondrial [Mus musculus]                                                           | 1268.6332 | 39.4   | 1.169814209 |
| 6677777  | FNPFVTSR               |                  | ribosomal protein L26 [Mus musculus]                                                                | 1082.5311 | 48.06  | 1.262420244 |
| 6753272  | FNSANEDNVTQVR          |                  | catalase [Mus musculus]                                                                             | 1493.7028 | 59.8   | 1.351018852 |
| 27228985 | FNVSATPEQYVPYSTTR      |                  | 13kDa differentiation-associated protein [Mus musculus]                                             | 1959.9514 | 29.03  | 0           |
| 22165384 | FPGQLNADLR             |                  | tubulin, beta, 2 [Mus musculus]                                                                     | 1130.5992 | 50.56  | 1.207159208 |
| 12963615 | FPGQLNADLR             |                  | tubulin, beta 3 [Mus musculus]                                                                      | 1130.5992 | 50.56  | 1.207159208 |
| 31981939 | FPGQLNADLR             |                  | tubulin, beta 4 [Mus musculus]                                                                      | 1130.5992 | 50.56  | 1.207159208 |
| 7106439  | FPGQLNADLR             |                  | tubulin, beta 5 [Mus musculus]                                                                      | 1130.5992 | 50.56  | 1.207159208 |
| 27754056 | FPGQLNADLR             |                  | tubulin, beta 6 [Mus musculus]                                                                      | 1130.5992 | 50.56  | 1.207159208 |
| 21746161 | FPGQLNADLR             |                  | tubulin, beta [Mus musculus]                                                                        | 1130.5992 | 50.56  | 1.207159208 |
| 30911099 | FPQLDDTSFANSR          |                  | fatty acid synthase [Mus musculus]                                                                  | 1497.6996 | 26.5   | 2.07047654  |
| 8567336  | FPSPVTVYASIR           |                  | chloride channel calcium activated 3 [Mus musculus]                                                 | 1336.7303 | 80.14  | 0.152568241 |
| 51771420 | FPTLWVGAR              |                  | PREDICTED: hypothetical protein LOC68693 [Mus musculus]                                             | 1034.5413 | 25.95  | 1.466630279 |
| 40254595 | FQLTDSQIYEVLSVIR       |                  | dihydropyrimidinase-like 2 [Mus musculus]                                                           | 1911.0327 | 32.11  | 0.930851465 |
| 6755863  | FQSSHHSTDITSLDQYVER    |                  | tumor rejection antigen gp96 [Mus musculus]                                                         | 2250.0479 | 67.79  | 0.81731602  |
| 23943876 | FSHSGNQLDGPITAFR       |                  | zymogen granule membrane protein 16 [Mus musculus]                                                  | 1746.8605 | 68.59  | 1.033735746 |
| 31543113 | FSLVGIAGQDLNEGMR       |                  | lymphocyte cytosolic protein 1 [Mus musculus]                                                       | 1689.8535 | 30.42  | 0           |
| 6671539  | FSNEEIAMATVTLR         |                  | aldolase 1, A isoform [Mus musculus]                                                                | 1652.8354 | 44.34  | 1.37338642  |
| 30578429 | FSPLMTAEGLGTR          |                  | hypothetical protein LOC94184 [Mus musculus]                                                        | 1379.6974 | 35.52  | 1.795552351 |
| 28893559 | FSPPPETGPSR            |                  | melanoma inhibitory activity 3 [Mus musculus]                                                       | 1203.5654 | 29.45  | 1.241576951 |
| 1346343  | FSSCGGGGSGFGAGGGFGR    |                  | Keratin, type II cytoskeletal 1 (Cytokeratin 1) (K1) (CK 1) (67 kDa cytoke                          | 1708.7263 | 28.99  | 0.449201489 |
| 33859482 | FSVSPVVR               |                  | erykaryotic translation elongation factor 2 [Mus musculus]                                          | 890.5062  | 25.82  | 1.18485759  |
| 31980648 | FTQAGSEVSALLGR         |                  | ATP synthase, H+ transporting mitochondrial F1 complex, beta subunit [Mus musculus]                 | 1435.7526 | 96.48  | 1.191416467 |
| 31980648 | FTQAGSEVSALLGR         | Deamidation (NQ) | ATP synthase, H+ transporting mitochondrial F1 complex, beta subunit [Mus musculus]                 | 1436.7588 | 49.96  | 0           |
| 13384736 | FTQDTQPHYIYSPR         |                  | dynein, cytoplasmic, heavy chain 1 [Mus musculus]                                                   | 1752.8468 | 46.02  | 0           |
| 9790067  | FVDGEWYR               |                  | staphylococcal nuclease domain containing 1 [Mus musculus]                                          | 1071.5005 | 19.87  | 0           |
| 31982178 | FVEGLPINDFSR           |                  | malate dehydrogenase 1, NAD (soluble) [Mus musculus]                                                | 1393.7152 | 69.78  | 1.392467344 |
| 31982186 | FVFLVDAMNGK            |                  | malate dehydrogenase 2, NAD (mitochondrial) [Mus musculus]                                          | 1327.6737 | 26.81  | 0           |
| 21704144 | FVIGGPQGDAGLTGR        |                  | methionine adenosyltransferase II, alpha [Mus musculus]                                             | 1444.7561 | 43.99  | 3.538092678 |
| 40068493 | FVINYDYPNSSEYVHR       |                  | DEAD box polypeptide 17 isoform 1 [Mus musculus]                                                    | 2117.9739 | 30.57  | 1.175296374 |
| 6679687  | FVMQEEFSR              |                  | glucose regulated protein [Mus musculus]                                                            | 1172.5493 | 32.19  | 0.983129897 |
| 6679753  | FVNVPVTFGK             |                  | Finkel-Biskis-Reilly murine sarcoma virus (FBR-MuSV) ubiquitously expressed (fox derived) [Mus musc | 1107.611  | 43.49  | 0           |
| 6680606  | FVTSSSGSYGGVR          |                  | keratin complex 1, acidic, gene 19 [Mus musculus]                                                   | 1303.6354 | 84.15  | 1.771019212 |
| 6679012  | FYEEVHDLR              |                  | nucleosome assembly protein 1-like 4 [Mus musculus]                                                 | 1336.6282 | 31.53  | 1.180267175 |
| 6678571  | FYPEDVAEELIQDITQK      |                  | villin 2 [Mus musculus]                                                                             | 2038.0093 | 73.65  | 1.418100531 |
| 6754750  | FYPEDVSEELIQDITQR      |                  | moesin [Mus musculus]                                                                               | 2082.0002 | 65.04  | 0.630479746 |
| 22122523 | FYQASTSELYGK           |                  | GDP-mannose 4, 6-dehydratase [Mus musculus]                                                         | 1393.6581 | 46.38  | 3.540344768 |
| 6679937  | GAAQNIIPASTGAAK        |                  | similar to glyceraldehyde-3-phosphate dehydrogenase [Mus musculus]                                  | 1369.7462 | 103.01 | 1.185563407 |
| 20806532 | GAEAAVNTGPDGVPVEGSR    |                  | cold shock domain protein A short isoform [Mus musculus]                                            | 1782.8549 | 20.37  | 0           |
| 6756033  | GAEAAVNTGPGGVPVQGSK    |                  | nuclease sensitive element binding protein 1 [Mus musculus]                                         | 1695.8685 | 100.07 | 1.397236379 |
| 55741460 | GAEEMETVIPVDVMR        |                  | DJ-1 protein [Mus musculus]                                                                         | 1675.8127 | 54.97  | 0           |
| 7304887  | GAGTDEFTLNR            |                  | annexin A3 [Mus musculus]                                                                           | 1180.5687 | 34.99  | 0           |
| 63746482 | GAGTGGLGLAVEGPEAK      |                  | PREDICTED: filamin, alpha [Mus musculus]                                                            | 1570.8103 | 73.45  | 1.153891489 |
| 47059123 | GAGVTLNLEMTADDLENALK   |                  | UDP glucuronosyltransferase 1 family, polypeptide A10 [Mus musculus]                                | 2174.1387 | 43.28  | 1.738682278 |
| 29293809 | GAIVPAQEVPPPTVPMDSWAR  |                  | ATP citrate lyase [Mus musculus]                                                                    | 2381.1929 | 55.49  | 1.512279613 |
| 7242197  | GAVYSFDPVGSYQR         |                  | proteasome (prosome, macropain) subunit, beta type 1 [Mus musculus]                                 | 1545.7368 | 34.43  | 1.207270371 |
| 31982186 | GCDVVVIPAGVPR          |                  | malate dehydrogenase 2, NAD (mitochondrial) [Mus musculus]                                          | 1281.6982 | 63.09  | 1.739921236 |
| 6679715  | GDATVSYEDPPTAK         |                  | Ewing sarcoma breakpoint region 1 [Mus musculus]                                                    | 1450.6666 | 38.77  | 0           |
| 21644581 | GDDDVFNPTNLLLEFLSDR    |                  | UDP-GlcNAc:betaGal beta-1,3-N-acetylglucosaminyltransferase 7 [Mus musculus]                        | 2166.0427 | 69.94  | 0.855326756 |
| 31543113 | GDEEGIPAVVIDMSGLR      |                  | lymphocyte cytosolic protein 1 [Mus musculus]                                                       | 1757.8774 | 81.7   | 0.378913118 |
| 6753484  | GDEGEVGDGPNNDISPR      |                  | procollagen, type VI, alpha 1 [Mus musculus]                                                        | 1971.8269 | 68.28  | 0           |
| 45597447 | GDGPVQGTIHFEQK         |                  | superoxide dismutase 1, soluble [Mus musculus]                                                      | 1512.7535 | 67.07  | 1.596321783 |
| 6755714  | GDPNWFMK               |                  | transgelin [Mus musculus]                                                                           | 994.4498  | 31.05  | 0.602589436 |
| 30348966 | GDQVSNQGLPAEQGSPR      |                  | spectrin beta 2 isoform 1 [Mus musculus]                                                            | 1739.8391 | 78.46  | 1.818929438 |
| 63660302 | GEAGIPAEFSIWTR         |                  | PREDICTED: filamin B, beta [Mus musculus]                                                           | 1533.7715 | 49.49  | 1.189669176 |
| 6678986  | GEELLSPLNLEQAAYAR      |                  | myosin IC [Mus musculus]                                                                            | 1873.9705 | 20.68  | 1.048854056 |
| 27370092 | GEETPVIVGSALCALEQR     |                  | Tu translation elongation factor, mitochondrial [Mus musculus]                                      | 1871.955  | 46.77  | 2.196926791 |
| 45504394 | GEFFNELVGQQR           |                  | integrin beta 1 (fibronectin receptor beta) [Mus musculus]                                          | 1423.6993 | 36.7   | 1.242742497 |

|          |                              |                    |                                                                                                     |           |        |             |
|----------|------------------------------|--------------------|-----------------------------------------------------------------------------------------------------|-----------|--------|-------------|
| 31982178 | GEFITTVQQR                   |                    | malate dehydrogenase 1, NAD (soluble) [Mus musculus]                                                | 1178.6248 | 45.37  | 1.507562053 |
| 54607098 | GEGGILINSQGER                |                    | succinate dehydrogenase Fp subunit [Mus musculus]                                                   | 1329.672  | 24.43  | 1.741721995 |
| 29336026 | GELEDLTDSTNAQQELR            |                    | nonmuscle myosin heavy chain [Mus musculus]                                                         | 1918.9    | 56.21  | 2.984492862 |
| 6754524  | GEMMDLQHGSLFLK               |                    | lactate dehydrogenase 1, A chain [Mus musculus]                                                     | 1605.7711 | 29.43  | 0           |
| 30841031 | GESLWLNLR                    | Deamidation (NQ)   | myosin regulatory light chain interacting protein [Mus musculus]                                    | 1088.5704 | 39.57  | 0           |
| 34328108 | GETGPAGPAGPIGPAGAR           |                    | procollagen, type I, alpha 1 [Mus musculus]                                                         | 1532.7882 | 71.62  | 0           |
| 21592285 | GFEVQVTELR                   |                    | keratin 20 [Mus musculus]                                                                           | 1177.6212 | 26.69  | 1.832762185 |
| 7949053  | GFGDGYNGYGGGPGGGNFGGSPGYGGGR |                    | heterogeneous nuclear ribonucleoprotein A2/B1 isoform 1 [Mus musculus]                              | 2495.0347 | 131.85 | 1.651384567 |
| 6681069  | GFGFGQGAGALVHSE              |                    | cysteine and glycine-rich protein 1 [Mus musculus]                                                  | 1433.6843 | 96.01  | 0.707588718 |
| 7949053  | GFGFVTFDDHDPVDK              |                    | heterogeneous nuclear ribonucleoprotein A2/B1 isoform 1 [Mus musculus]                              | 1695.776  | 78.45  | 1.625001056 |
| 7304885  | GFGTDEQAIDCLGSR              |                    | annexin A11 [Mus musculus]                                                                          | 1681.7959 | 29.68  | 0           |
| 6680027  | GFIGPGIDVPAADMSTGER          |                    | glutamate dehydrogenase 1 [Mus musculus]                                                            | 1915.9348 | 29.08  | 1.298570782 |
| 6679687  | GFPTIYFSPANK                 |                    | glucose regulated protein [Mus musculus]                                                            | 1341.6696 | 35.81  | 0           |
| 13385310 | GFVDDIIQPSSTR                |                    | propionyl Coenzyme A carboxylase, beta polypeptide [Mus musculus]                                   | 1434.717  | 34.7   | 2.05709272  |
| 34328204 | GFVPSATSKPEGHSLVDR           |                    | valyl-tRNA synthetase 2 [Mus musculus]                                                              | 2013.0031 | 42     | 0           |
| 24418933 | GGENIYPAELDDFLK              |                    | hypothetical protein LOC264895 [Mus musculus]                                                       | 1841.8958 | 41.8   | 1.79008314  |
| 6755252  | GGGGGGGGPGEQETQELASK         |                    | purine rich element binding protein B [Mus musculus]                                                | 1829.8319 | 100.02 | 1.332627616 |
| 1346343  | GGGGGGYSGGSSYSGGGSYGGGGGGGR  |                    | Keratin, type II cytoskeletal 1 (Cytokeratin 1) (K1) (CK 1) (67 kDa cytokeratin) (Hair alpha protei | 2383.9514 | 246.08 | 0           |
| 7949053  | GGGGNGFGPGGSNFR              |                    | heterogeneous nuclear ribonucleoprotein A2/B1 isoform 1 [Mus musculus]                              | 1377.6469 | 92.18  | 1.287443209 |
| 6755372  | GGKPEPPAMPQPVPPTA            |                    | ribosomal protein S3 [Mus musculus]                                                                 | 1573.8066 | 41.56  | 3.765510896 |
| 34328400 | GGPPFAFVEFEDPR               |                    | splicing factor, arginine/serine-rich 1 (ASF/SF2) [Mus musculus]                                    | 1564.7487 | 24.96  | 1.110684326 |
| 13928672 | GGQVQVVAADQR                 |                    | tenascin XB [Mus musculus]                                                                          | 1395.7329 | 28.89  | 0           |
| 29789343 | GHPSAGAEIEGGSDGSAEAEPR       |                    | eukaryotic translation initiation factor 3, subunit 9 [Mus musculus]                                | 2167.9148 | 129.26 | 1.277810076 |
| 33859482 | GHVFEEQVAGTPMFVVK            |                    | eukaryotic translation elongation factor 2 [Mus musculus]                                           | 1961.9587 | 28.23  | 1.757238306 |
| 22165384 | GHYTEGAELVDSVLDVVR           |                    | tubulin, beta, 2 [Mus musculus]                                                                     | 1958.9666 | 21.31  | 1.052345156 |
| 12963615 | GHYTEGAELVDSVLDVVR           |                    | tubulin, beta 3 [Mus musculus]                                                                      | 1958.9666 | 21.31  | 1.052345156 |
| 7106439  | GHYTEGAELVDSVLDVVR           |                    | tubulin, beta 5 [Mus musculus]                                                                      | 1958.9666 | 21.31  | 1.052345156 |
| 27754056 | GHYTEGAELVDSVLDVVR           |                    | tubulin, beta 6 [Mus musculus]                                                                      | 1958.9666 | 21.31  | 1.052345156 |
| 21746161 | GHYTEGAELVDSVLDVVR           |                    | tubulin, beta [Mus musculus]                                                                        | 1958.9666 | 21.31  | 1.052345156 |
| 21313262 | GIEQAVQSHAVAEER              |                    | inner membrane protein, mitochondrial [Mus musculus]                                                | 1823.8969 | 34.02  | 2.503053163 |
| 30425250 | GIHETTFNSIMK                 |                    | hypothetical protein LOC238880 [Mus musculus]                                                       | 1377.6744 | 53.78  | 0           |
| 21450291 | GILAADESVMGNR                |                    | aldolase 2, B isoform [Mus musculus]                                                                | 1490.7313 | 25.78  | 0           |
| 63518159 | GILFVGSVSGGEEGAR             |                    | PREDICTED: phosphogluconate dehydrogenase [Mus musculus]                                            | 1591.8092 | 41.61  | 1.91506559  |
| 31543942 | GILSGTSDLLTFDEAEVR           |                    | vinculin [Mus musculus]                                                                             | 2036.0447 | 43.75  | 1.725135628 |
| 6679457  | GINQGQVWIGGR                 |                    | proteoglycan 2, bone marrow [Mus musculus]                                                          | 1284.6797 | 44.25  | 0.18417914  |
| 7709980  | GISEETTTGVHNLK               |                    | S-adenosylhomocysteine hydrolase [Mus musculus]                                                     | 1648.8407 | 39.63  | 0           |
| 11230802 | GISQEQMQEFR                  |                    | actinin alpha 4 [Mus musculus]                                                                      | 1352.6307 | 52.17  | 1.659917977 |
| 51592084 | GIVEESVTGVHR                 |                    | hypothetical protein LOC74340 [Mus musculus]                                                        | 1282.6758 | 28.82  | 0           |
| 13384736 | GKEDEGEEAASPMQLQIR           |                    | dynein, cytoplasmic, heavy chain 1 [Mus musculus]                                                   | 1987.938  | 70.99  | 1.21094498  |
| 36031080 | GLDGFQGPSGPR                 |                    | procollagen, type IV, alpha 2 [Mus musculus]                                                        | 1187.5878 | 53.7   | 0.831668652 |
| 10946870 | GLEVTAYSPLGSSDR              |                    | aldo-keto reductase family 1, member A4 (aldehyde reductase) [Mus musculus]                         | 1551.7498 | 23.97  | 1.300708231 |
| 6755863  | GLFDEYGSK                    |                    | tumor rejection antigen gp96 [Mus musculus]                                                         | 1015.4771 | 48.51  | 0.713869232 |
| 6753060  | GLGTDEDSILNLLTSR             |                    | annexin A5 [Mus musculus]                                                                           | 1703.8772 | 31.02  | 0.979431474 |
| 6996913  | GLGTDEDSLIEICSR              |                    | annexin A2 [Mus musculus]                                                                           | 1720.8485 | 58.29  | 1.210407661 |
| 31982159 | GLGTEVPGNFQGPDPYR            |                    | hypothetical protein LOC235043 [Mus musculus]                                                       | 1803.873  | 25.11  | 0           |
| 6678329  | GLLIEPAANSYLLAER             |                    | transglutaminase 2, C polypeptide [Mus musculus]                                                    | 1729.9501 | 46.71  | 1.140282045 |
| 7710046  | GLLQQVPAHK                   | 2 Deamidation (NQ) | kinesin family member 21A [Mus musculus]                                                            | 1206.6469 | 19.67  | 0           |
| 63746482 | GLVEPVDVVDNADGTQTVNYVPSR     |                    | PREDICTED: filamin, alpha [Mus musculus]                                                            | 2544.2566 | 147.4  | 0.715269342 |
| 13386272 | GLVYETSVLDPDEGIR             |                    | citrate synthase-like protein [Mus musculus]                                                        | 1762.8864 | 54.38  | 2.685352708 |
| 13385942 | GLVYETSVLDPDEGIR             |                    | citrate synthase [Mus musculus]                                                                     | 1762.8864 | 54.38  | 2.685352708 |
| 6680748  | GMSLNLEPDNVGVVFGNDK          |                    | ATP synthase, H+ transporting, mitochondrial F1 complex, alpha subunit, isoform 1 [Mus musculus]    | 2103.9973 | 39.51  | 1.652539735 |
| 31560611 | GMTVYGLPR                    |                    | calponin 1 [Mus musculus]                                                                           | 993.5183  | 43.75  | 0.707003186 |
| 30911099 | GNAGQTYNGFANSTMER            |                    | fatty acid synthase [Mus musculus]                                                                  | 1817.7994 | 36.42  | 1.209839864 |
| 33859580 | GNDVAFHFNPR                  |                    | galectin-3 [Mus musculus]                                                                           | 1273.6163 | 64.14  | 2.419346912 |
| 63492583 | GNFNYVEFTR                   |                    | PREDICTED: myosin regulatory light polypeptide 9 [Mus musculus]                                     | 1246.5905 | 27.7   | 1.104561636 |
| 21704206 | GNWGYLDQAAALR                |                    | carboxylesterase 2 [Mus musculus]                                                                   | 1434.7162 | 35.4   | 1.898350931 |
| 19527034 | GPAPLGTGFQVTTQPR             |                    | lamin B receptor [Mus musculus]                                                                     | 1569.8458 | 23.77  | 0.86140555  |
| 31560611 | GPAYGLSAEVK                  |                    | calponin 1 [Mus musculus]                                                                           | 1091.5737 | 86.93  | 0.795271997 |
| 6755204  | GPGLYYDSEGNR                 |                    | proteasome (prosome, macropain) subunit, beta type 5 [Mus musculus]                                 | 1426.6721 | 20.45  | 0           |
| 6755698  | GQNDLMGTAEDFADQFLR           |                    | surfeit gene 4 [Mus musculus]                                                                       | 2027.9204 | 146.59 | 1.4045096   |

|          |                           |                                                                                                   |           |        |             |
|----------|---------------------------|---------------------------------------------------------------------------------------------------|-----------|--------|-------------|
| 27532959 | GSASSALELTHEELATAEAVR     | aldehyde dehydrogenase 1 family, member L1 [Mus musculus]                                         | 2134.0356 | 48.46  | 0           |
| 16716467 | GSDHSASLEPGLAELVR         | N-acetylneuraminic acid synthase (sialic acid synthase) [Mus musculus]                            | 1866.9211 | 85.37  | 1.295503878 |
| 29788989 | GSESSKPWPDATTYGAGSAR      | thyroid hormone receptor associated protein 3 [Mus musculus]                                      | 2111.9739 | 67.49  | 0.95025085  |
| 58037267 | GSFSEQGINEFLR             | protein disulfide isomerase-associated 6 [Mus musculus]                                           | 1483.7228 | 44.36  | 1.059951443 |
| 6678573  | GSLNITTPGIQIWR            | villin 1 [Mus musculus]                                                                           | 1555.86   | 53.54  | 1.13790256  |
| 21704156 | GSVFSAPSASGTPNK           | caldesmon 1 [Mus musculus]                                                                        | 1406.6918 | 50.39  | 0           |
| 6678449  | GSVNMPFMDFLTK             | thiosulfate sulfurtransferase, mitochondrial [Mus musculus]                                       | 1486.7106 | 26.6   | 0           |
| 6754186  | GSYSLSHVYTPNDVR           | hexosaminidase B [Mus musculus]                                                                   | 1694.8112 | 27.65  | 1.181256298 |
| 7657429  | GSYTYFAPSNEAWENLSDIR      | osteoblast specific factor 2 (fasciclin I-like) [Mus musculus]                                    | 2435.0845 | 52.73  | 0           |
| 22094075 | GTDIMYTGTLDCWR            | solute carrier family 25, member 5 [Mus musculus]                                                 | 1631.7345 | 27.99  | 1.958587295 |
| 6680850  | GTELDGDIQADSGPINDIDANPR   | caspase 7 [Mus musculus]                                                                          | 2383.0952 | 36.1   | 1.987240867 |
| 6753428  | GTGGVDTAATGSVFDISNDR      | creatine kinase, mitochondrial 1, ubiquitous [Mus musculus]                                       | 2052.9976 | 107.28 | 2.128418589 |
| 7304887  | GTGTDEDALIEILTR           | annexin A3 [Mus musculus]                                                                         | 1704.8691 | 47.28  | 1.448902338 |
| 31560449 | GTPEPGLGATDER             | aspartyl aminopeptidase [Mus musculus]                                                            | 1396.6742 | 43.84  | 1.972843945 |
| 31981826 | GTSFEAAATSGGSASSEK        | electron transferring flavoprotein, alpha polypeptide [Mus musculus]                              | 1644.7307 | 66.57  | 1.081640555 |
| 31652266 | GTVAASAAAGAGGGGAGAGAPGGGR | hypothetical protein LOC229543 [Mus musculus]                                                     | 1939.9382 | 26.34  | 0           |
| 22164798 | GTWEKPGDAAPMGYDFWYQPR     | selenium binding protein 1 [Mus musculus]                                                         | 2472.1118 | 20.91  | 3.279578784 |
| 19526818 | GVAPLWMR                  | solute carrier family 25 (mitochondrial carrier, phosphate carrier), member 3 [Mus musculus]      | 929.5062  | 35.4   | 1.447726712 |
| 6996913  | GVDEVTIVNLTNR             | annexin A2 [Mus musculus]                                                                         | 1542.8496 | 71.16  | 1.334638165 |
| 29789257 | GVDLQESNPASR              | RAB5C, member RAS oncogene family [Mus musculus]                                                  | 1272.6211 | 28.72  | 0.865639945 |
| 13385374 | GVDLTEPAQPAR              | RAB5A, member RAS oncogene family [Mus musculus]                                                  | 1253.6487 | 25.41  | 0.922249639 |
| 30409956 | GVGISEGNETVEDIAAR         | ATPase, Na+/K+ transporting, alpha 2 polypeptide [Mus musculus]                                   | 1829.929  | 106.63 | 1.557080014 |
| 21450277 | GVGISEGNETVEDIAAR         | Na+/K+ -ATPase alpha 1 subunit [Mus musculus]                                                     | 1829.929  | 106.63 | 1.557080014 |
| 6755863  | GVVDSDDLPLNVSR            | tumor rejection antigen gp96 [Mus musculus]                                                       | 1485.7578 | 65.42  | 0.894371525 |
| 6754254  | GVVDSDELPLNISR            | heat shock protein 1, alpha [Mus musculus]                                                        | 1513.792  | 89.66  | 1.77319245  |
| 40556608 | GVVDSDELPLNISR            | heat shock protein 1, beta [Mus musculus]                                                         | 1513.792  | 89.66  | 1.77319245  |
| 6671539  | GVVPLAGTNGETTQGLDGLSER    | aldolase 1, A isoform [Mus musculus]                                                              | 2272.1511 | 124.27 | 1.539033521 |
| 31543942 | GWLDRPNASPGDAGEQAIR       | vinculin [Mus musculus]                                                                           | 2009.98   | 21.65  | 0           |
| 22122825 | GYAFNHSADFETVR            | actin-related protein 2 [Mus musculus]                                                            | 1613.7417 | 59.12  | 0.819838263 |
| 7305085  | GYDVDFPR                  | glutamine fructose-6-phosphate transaminase 1 [Mus musculus]                                      | 968.4521  | 35.8   | 1.571013396 |
| 21450625 | GYDVIAQAQSGTGK            | eukaryotic translation initiation factor 4A1 [Mus musculus]                                       | 1394.6914 | 57.96  | 1.543435483 |
| 59709449 | GYEEWLLNEIR               | actinin alpha 2 [Mus musculus]                                                                    | 1421.7136 | 51.78  | 0           |
| 11230802 | GYEEWLLNEIR               | actinin alpha 4 [Mus musculus]                                                                    | 1421.7136 | 51.78  | 0           |
| 63487095 | GYELLFQPEVVR              | PREDICTED: catenin src [Mus musculus]                                                             | 1449.7766 | 28.1   | 2.405161178 |
| 7949051  | GYFEYIEENK                | heterogenous nuclear ribonucleoprotein U [Mus musculus]                                           | 1291.595  | 24.56  | 0           |
| 6753036  | GYFIQPTVFGDVK             | aldehyde dehydrogenase 2, mitochondrial [Mus musculus]                                            | 1470.7659 | 56.47  | 1.563680827 |
| 6681069  | GYGYGQGAGTLSTDK           | cysteine and glycine-rich protein 1 [Mus musculus]                                                | 1474.698  | 69.38  | 0           |
| 6681069  | GYGYGQGAGTLSTDKGESLGK     | cysteine and glycine-rich protein 1 [Mus musculus]                                                | 2159.0708 | 164.37 | 0.78173788  |
| 16716467 | GYPDEFINLAGK              | N-acetylneuraminic acid synthase (sialic acid synthase) [Mus musculus]                            | 1420.7025 | 61.35  | 0           |
| 45598381 | GYPTLLLF                  | thioredoxin domain containing 5 [Mus musculus]                                                    | 1079.6244 | 24.67  | 1.093681677 |
| 6671509  | GYSFTTAAER                | actin, beta, cytoplasmic [Mus musculus]                                                           | 1132.5454 | 64.52  | 1.267661568 |
| 63652452 | GYSFTTAAER                | PREDICTED: similar to cytoplasmic beta-actin [Mus musculus]                                       | 1132.5454 | 64.52  | 1.267661568 |
| 6671507  | GYSFVTTAER                | actin, alpha 2, smooth muscle, aorta [Mus musculus]                                               | 1130.5693 | 55.27  | 0.742164337 |
| 22164798 | HEIIQLQMTDGLIPLIIR        | selenium binding protein 1 [Mus musculus]                                                         | 2220.1897 | 21.98  | 2.119793343 |
| 6680027  | HGGTIPVVPTAEFQDR          | glutamate dehydrogenase 1 [Mus musculus]                                                          | 1723.8844 | 63.07  | 1.643367988 |
| 22122825 | HIVLSGGSTMYPGLPSR         | actin-related protein 2 [Mus musculus]                                                            | 1771.922  | 51.33  | 0.889113883 |
| 8567336  | HLPTVSAGGTSICSGLR         | chloride channel calcium activated 3 [Mus musculus]                                               | 1655.8521 | 69.77  | 0           |
| 6753010  | HLSPDGQYVPR               | anterior gradient 2 [Mus musculus]                                                                | 1268.6426 | 66.64  | 1.139952305 |
| 6671507  | HQGVVMGMGQK               | actin, alpha 2, smooth muscle, aorta [Mus musculus]                                               | 1171.5806 | 50.09  | 0.665057369 |
| 6671509  | HQGVVMGMGQK               | actin, beta, cytoplasmic [Mus musculus]                                                           | 1171.5806 | 50.09  | 0.665057369 |
| 30425250 | HQGVVMGMGQK               | hypothetical protein LOC238880 [Mus musculus]                                                     | 1171.5806 | 50.09  | 0.665057369 |
| 33563250 | HQIQSYTCEIDALK            | desmin [Mus musculus]                                                                             | 1648.8051 | 63.66  | 0.928714645 |
| 58037267 | HQSLGGQYGVQGFPPTIK        | protein disulfide isomerase-associated 6 [Mus musculus]                                           | 1816.9241 | 22.76  | 1.151197498 |
| 10946928 | HTGPNSPDTANDGFVR          | heterogeneous nuclear ribonucleoprotein H1 [Mus musculus]                                         | 1684.7822 | 56.7   | 1.987137859 |
| 6678413  | HVFGESDELIGQK             | triosephosphate isomerase 1 [Mus musculus]                                                        | 1458.7206 | 54.09  | 0           |
| 27229048 | HVSPAGAAVGPLSEDEAR        | 5-aminoimidazole-4-carboxamide ribonucleotide formyltransferase/IMP cyclohydrolase [Mus musculus] | 1861.9457 | 65.54  | 1.460610383 |
| 28916693 | HVVPNEVVQR                | gelsolin [Mus musculus]                                                                           | 1275.7238 | 42.01  | 1.300641138 |
| 63487095 | HYEDGYPGGSDNYGSLSR        | PREDICTED: catenin src [Mus musculus]                                                             | 1973.8362 | 80.61  | 2.684353192 |
| 6755142  | HYGPGVWSMANAGK            | peptidylprolyl isomerase B [Mus musculus]                                                         | 1474.6915 | 54.18  | 0           |
| 6754036  | IAATILTSPDLR              | glutamate oxaloacetate transaminase 2, mitochondrial [Mus musculus]                               | 1270.7218 | 25.99  | 0           |

|          |                          |                                                                                                       |           |        |             |
|----------|--------------------------|-------------------------------------------------------------------------------------------------------|-----------|--------|-------------|
| 21450291 | IADQCPSSLAIQENANALAR     | aldolase 2, B isoform [Mus musculus]                                                                  | 2085.0452 | 52.92  | 1.199741588 |
| 63476037 | IAEGVPLLIVLTAEPSGDDVR    | PREDICTED: procollagen, type VI, alpha 3 [Mus musculus]                                               | 2292.2407 | 72     | 0           |
| 6679515  | IAIPGLAGAGNSVLLVSNLNER   | polypyrimidine tract binding protein 1 [Mus musculus]                                                 | 2275.2805 | 20.63  | 1.518729168 |
| 31981515 | IALTDNSLIAR              | ribosomal protein L7 [Mus musculus]                                                                   | 1186.6809 | 23.19  | 0           |
| 63746482 | IANLQTDLSDGLR            | PREDICTED: filamin, alpha [Mus musculus]                                                              | 1415.7552 | 48.23  | 0.697543239 |
| 7305295  | IAQLEEEEEEQGNMEAMSDR     | myosin, heavy polypeptide 11, smooth muscle [Mus musculus]                                            | 2451.0693 | 128.64 | 0.783944473 |
| 7305295  | IAQLEEQVEQEAR            | myosin, heavy polypeptide 11, smooth muscle [Mus musculus]                                            | 1542.7859 | 81.77  | 0.893544911 |
| 6678992  | IAQNESELISDEAQGDMALR     | myosin VI [Mus musculus]                                                                              | 2190.0381 | 34.43  | 1.577597538 |
| 41054806 | IAQSDYIPTQQDVLR          | guanine nucleotide binding protein, alpha inhibiting 2 [Mus musculus]                                 | 1746.9111 | 45.45  | 0.87476845  |
| 21704020 | IASQVAALDLGYKPGVEAIR     | NADH dehydrogenase (ubiquinone) Fe-S protein 1 [Mus musculus]                                         | 2071.1646 | 37.97  | 1.532452221 |
| 36031080 | IAVQPGTLGPQGR            | procollagen, type IV, alpha 2 [Mus musculus]                                                          | 1293.7361 | 35.39  | 0.750836714 |
| 11230802 | ICDQWDNLGSLTHSR          | actinin alpha 4 [Mus musculus]                                                                        | 1744.8232 | 26.38  | 1.852368046 |
| 6680836  | IDDPTDSKPEDWDKPEHIPDPDAK | calreticulin [Mus musculus]                                                                           | 2760.2769 | 39.64  | 0.892674186 |
| 13384620 | IDEPLEGSER               | heterogeneous nuclear ribonucleoprotein K [Mus musculus]                                              | 1259.5809 | 43.91  | 1.315234443 |
| 23346461 | IDVEEMLTNNR              | NADH dehydrogenase (ubiquinone) Fe-S protein 2 [Mus musculus]                                         | 1462.6921 | 32.73  | 0           |
| 6680854  | IDFEDVIAEPEGTHSFDGIWK    | caveolin, caveolae protein 1 [Mus musculus]                                                           | 2405.1348 | 28.6   | 0           |
| 40556608 | IDIIPNQER                | heat shock protein 1, beta [Mus musculus]                                                             | 1194.6537 | 54.64  | 1.502237539 |
| 37202121 | IDIPSFWDPIAPFPR          | 4-aminobutyrate aminotransferase [Mus musculus]                                                       | 1770.9143 | 22.46  | 1.745664573 |
| 31982030 | IDKTDYMGVSYGPR           | Rho GDP dissociation inhibitor (GDI) alpha [Mus musculus]                                             | 1601.7736 | 58     | 1.554345971 |
| 31980969 | IDMNLTLDLGELQR           | SEC23B [Mus musculus]                                                                                 | 1630.8511 | 59.76  | 1.192586874 |
| 9790073  | IDSVTGEIFSAAPLDR         | cadherin 17 [Mus musculus]                                                                            | 1690.8463 | 53.42  | 1.64420778  |
| 7949053  | IDTIEITDR                | heterogeneous nuclear ribonucleoprotein A2/B1 isoform 1 [Mus musculus]                                | 1188.6476 | 47.99  | 1.145916056 |
| 31981100 | IEDVTPIPSDSTR            | ribosomal protein S14 [Mus musculus]                                                                  | 1429.7207 | 57.74  | 1.930229705 |
| 6680606  | IEELNTQVAHVHSEIQIISK     | keratin complex 1, acidic, gene 19 [Mus musculus]                                                     | 2166.1489 | 109.05 | 2.341206914 |
| 37620153 | IEGYDPDEVVWFK            | myosin, light polypeptide kinase telokin isoform [Mus musculus]                                       | 1578.7821 | 32     | 1.03577389  |
| 1346343  | IEISELNR                 | Keratin, type II cytoskeletal 1 (Cytokeratin 1) (K1) (CK 1) (67 kDa cytokekeratin) (Hair alpha protei | 973.5298  | 29.4   | 0           |
| 33563270 | IEQLSPFPDLLLK            | oxoglutarate dehydrogenase (lipoamide) [Mus musculus]                                                 | 1659.9302 | 47.36  | 1.566779711 |
| 33563250 | IESLNIEIAFLK             | desmin [Mus musculus]                                                                                 | 1405.7482 | 72.25  | 0.633288431 |
| 31559916 | IETIEVMEDR               | heterogeneous nuclear ribonucleoprotein A3 isoform b [Mus musculus]                                   | 1234.6002 | 47.1   | 1.168064632 |
| 31981722 | IEWLESHQDADIEDFK         | heat shock 70kD protein 5 (glucose-regulated protein) [Mus musculus]                                  | 1974.9219 | 49.72  | 0           |
| 14861854 | IFEAQIAGLR               | keratin complex 2, basic, gene 7 [Mus musculus]                                                       | 1117.6311 | 26.65  | 1.239435792 |
| 31982186 | IFGVTTLDIVR              | malate dehydrogenase 2, NAD (mitochondrial) [Mus musculus]                                            | 1233.7222 | 44.49  | 1.334657055 |
| 27804325 | IFSVTNGGQER              | monoamine oxidase A [Mus musculus]                                                                    | 1208.5897 | 19.02  | 0           |
| 31559916 | IFVGGIKEDTEEYNLR         | heterogeneous nuclear ribonucleoprotein A3 isoform b [Mus musculus]                                   | 1882.9696 | 63.82  | 1.572981676 |
| 7710042  | IFYPETTDIYDR             | IQ motif containing GTPase activating protein 1 [Mus musculus]                                        | 1532.7327 | 35.24  | 1.126130121 |
| 63476037 | IGDLQSQIVSLK             | PREDICTED: procollagen, type VI, alpha 3 [Mus musculus]                                               | 1413.8265 | 51.62  | 0           |
| 6671539  | IGEHTPSALAIMENANVLAR     | aldolase 1, A isoform [Mus musculus]                                                                  | 2107.0918 | 60.22  | 1.32652652  |
| 6754750  | IGFPWSEIR                | moesin [Mus musculus]                                                                                 | 1104.5889 | 30.93  | 0.992323166 |
| 6678571  | IGFPWSEIR                | villin 2 [Mus musculus]                                                                               | 1104.5889 | 30.93  | 0.992323166 |
| 51873060 | IGGIGTVPVGR              | eukaryotic translation elongation factor 1 alpha 1 [Mus musculus]                                     | 1025.6194 | 63.35  | 1.354619545 |
| 63660294 | IGNLQTDLSDGLR            | PREDICTED: similar to Filamin B (FLN-B) (Beta-filamin) (Actin-binding like protein) (ABP-280-like p   | 1401.7336 | 36.48  | 1.173882269 |
| 6754976  | IGYPAPNFK                | peroxiredoxin 1 [Mus musculus]                                                                        | 1006.5381 | 39.81  | 1.368302676 |
| 6680027  | IIAEGANGPTTPEADK         | glutamate dehydrogenase 1 [Mus musculus]                                                              | 1583.7975 | 106.93 | 1.357065653 |
| 6680027  | IIAEGANGPTTPEADKIFLER    | glutamate dehydrogenase 1 [Mus musculus]                                                              | 2242.1719 | 57.92  | 1.301022626 |
| 6671507  | IIAPPER                  | actin, alpha 2, smooth muscle, aorta [Mus musculus]                                                   | 795.4758  | 27.19  | 0.727938001 |
| 6671509  | IIAPPER                  | actin, beta, cytoplasmic [Mus musculus]                                                               | 795.4758  | 27.19  | 0.727938001 |
| 30425250 | IIAPPER                  | hypothetical protein LOC238880 [Mus musculus]                                                         | 795.4758  | 27.19  | 0.727938001 |
| 63652452 | IIAPPER                  | PREDICTED: similar to cytoplasmic beta-actin [Mus musculus]                                           | 795.4758  | 27.19  | 0.727938001 |
| 46909602 | IIDTPQFQR                | SAM domain- and HD domain-containing protein 1 [Mus musculus]                                         | 1117.6003 | 21.05  | 0           |
| 6677813  | IIDVVYNASNELVR           | ribosomal protein S8 [Mus musculus]                                                                   | 1718.9076 | 79.07  | 1.105492692 |
| 63476037 | IIEELDVKPDGTR            | PREDICTED: procollagen, type VI, alpha 3 [Mus musculus]                                               | 1484.8019 | 42.92  | 0.80933878  |
| 6679567  | IIGAVDQIQLTQAQLEER       | polymerase I and transcript release factor [Mus musculus]                                             | 2025.0983 | 93.86  | 0.931946047 |
| 20137006 | IIGLDQVAGMSETALPGAFK     | myosin, heavy polypeptide 9, non-muscle [Mus musculus]                                                | 2018.0596 | 58.56  | 1.805047074 |
| 41054806 | IIHEDGYSEEECR            | guanine nucleotide binding protein, alpha inhibiting 2 [Mus musculus]                                 | 1579.6807 | 54.76  | 1.077433137 |
| 6679891  | IILTAQPFR                | alpha glucosidase 2 alpha neutral subunit [Mus musculus]                                              | 1058.6394 | 23.32  | 1.405309341 |
| 31981722 | IINEPTAAAIAYGLDK         | heat shock 70kD protein 5 (glucose-regulated protein) [Mus musculus]                                  | 1659.8976 | 84.81  | 1.273074013 |
| 7305163  | IINEPTAAAIAYGLDK         | heat shock protein 1-like [Mus musculus]                                                              | 1659.8976 | 84.81  | 1.273074013 |
| 31981690 | IINEPTAAAIAYGLDK         | heat shock protein 8 [Mus musculus]                                                                   | 1659.8976 | 84.81  | 1.273074013 |
| 63664182 | IINEPTAAAIAYGLDK         | PREDICTED: similar to heat shock protein 8 [Mus musculus]                                             | 1659.8976 | 84.81  | 1.273074013 |
| 31981722 | IINEPTAAAIAYGLDKR        | heat shock 70kD protein 5 (glucose-regulated protein) [Mus musculus]                                  | 1816.0011 | 76.72  | 1.489039231 |

Deamidation (NQ)

|          |                                |                  |                                                                                                  |           |        |             |
|----------|--------------------------------|------------------|--------------------------------------------------------------------------------------------------|-----------|--------|-------------|
| 63704924 | IINEPTAAAIAYGLDR               |                  | PREDICTED: heat shock protein 1B [Mus musculus]                                                  | 1687.9027 | 32.62  | 1.443775552 |
| 6679439  | IIPGFMCGGGDFTR                 |                  | peptidylprolyl isomerase A [Mus musculus]                                                        | 1541.7091 | 77.57  | 1.358668365 |
| 136429   | IITHPNFNGNTLNDIMLIK            |                  | Trypsin precursor                                                                                | 2283.1948 | 135.62 | 0           |
| 136429   | IITHPNFNGNTLNDIMLIK            | Oxidation (M)    | Trypsin precursor                                                                                | 2299.1697 | 85.99  | 0           |
| 13384620 | IITITGTQDQIQNAQYLLQNSVK        |                  | heterogeneous nuclear ribonucleoprotein K [Mus musculus]                                         | 2589.4023 | 36.78  | 0           |
| 6680836  | IKDPDAAKPEDWDER                |                  | calreticulin [Mus musculus]                                                                      | 1784.8551 | 99.76  | 0.993718388 |
| 6678359  | ILATPPQEDAPSVDIANIR            |                  | transketolase [Mus musculus]                                                                     | 2020.0781 | 96.41  | 1.106966401 |
| 13937395 | ILEQEEMEEQAGK                  |                  | arsenate resistance protein 2 [Mus musculus]                                                     | 1531.7111 | 26.36  | 0           |
| 6680748  | ILGADTSVLEETGR                 |                  | ATP synthase, H+ transporting, mitochondrial F1 complex, alpha subunit, isoform 1 [Mus musculus] | 1575.7968 | 54.53  | 1.03259392  |
| 31982755 | ILLAELEQLK                     |                  | vimentin [Mus musculus]                                                                          | 1169.7081 | 47.33  | 0           |
| 6680067  | ILLANFLAQTEALMK                |                  | glucose phosphate isomerase 1 [Mus musculus]                                                     | 1675.9438 | 70.07  | 1.976836372 |
| 31981679 | ILQSSSEVGYDAMLGDFVNMVCK        |                  | heat shock protein 1 (chaperonin) [Mus musculus]                                                 | 2532.2334 | 58.49  | 0           |
| 13384620 | ILSISADLETIGEILK               |                  | heterogeneous nuclear ribonucleoprotein K [Mus musculus]                                         | 1714.9906 | 75.41  | 1.853582826 |
| 58037117 | ILTDYGFEGHPFR                  |                  | NADH dehydrogenase (ubiquinone) Fe-S protein 3 [Mus musculus]                                    | 1551.7582 | 19.41  | 0.80294957  |
| 6677771  | ILTFDQLALESFK                  |                  | ribosomal protein L18 [Mus musculus]                                                             | 1474.8118 | 72.25  | 1.368565235 |
| 31980648 | IMDPNIVGNEHYDVAR               |                  | ATP synthase, H+ transporting mitochondrial F1 complex, beta subunit [Mus musculus]              | 1842.8937 | 66.95  | 1.451464091 |
| 13385310 | IMDQAITVGAPVIGLNDSSGGAR        |                  | propionyl Coenzyme A carboxylase, beta polypeptide [Mus musculus]                                | 2155.0833 | 25.77  | 1.323201859 |
| 18152793 | IMEGPAFNFLDAPAVR               |                  | pyruvate dehydrogenase (lipoamide) beta [Mus musculus]                                           | 1747.895  | 46.62  | 1.137800058 |
| 20137006 | IMGIPEDQMGLLR                  |                  | myosin, heavy polypeptide 9, non-muscle [Mus musculus]                                           | 1601.8076 | 51.84  | 1.464351347 |
| 31980648 | IMNVIGEPIDER                   |                  | ATP synthase, H+ transporting mitochondrial F1 complex, beta subunit [Mus musculus]              | 1385.722  | 39.96  | 0           |
| 6724311  | INEAFDLLR                      |                  | alcohol dehydrogenase 1 (class I) [Mus musculus]                                                 | 1090.5936 | 56.14  | 1.880053718 |
| 51772556 | INFDDNAEFR                     |                  | PREDICTED: similar to Succinate-Coenzyme A ligase, GDP-forming, beta subunit [Mus musculus]      | 1240.5638 | 38.51  | 1.702499035 |
| 6754822  | INIDILPAERR                    | Deamidation (NQ) | NIMA (never in mitosis gene a)-related expressed kinase 4 [Mus musculus]                         | 1310.7545 | 22.14  | 0           |
| 6754994  | INISEGNCPER                    |                  | poly(rC) binding protein 1 [Mus musculus]                                                        | 1231.5785 | 27.67  | 1.179188899 |
| 63562740 | INKPEVQCEDPEAVQEPESCSEHR       |                  | PREDICTED: similar to secreted gel-forming mucin [Mus musculus]                                  | 2753.21   | 96.75  | 0.491762924 |
| 33563250 | INLPIQTFSALNFR                 |                  | desmin [Mus musculus]                                                                            | 1633.9097 | 80.81  | 0.62364535  |
| 33563250 | INLPIQTFSALNFR                 | Deamidation (NQ) | desmin [Mus musculus]                                                                            | 1634.9099 | 34.59  | 0           |
| 9903607  | INPDGSSQSVVEVPYAR              |                  | transmembrane protein 4 [Mus musculus]                                                           | 1730.8779 | 37.41  | 1.161076883 |
| 27804325 | INVLVLEAR                      |                  | monoamine oxidase A [Mus musculus]                                                               | 1026.6274 | 26.05  | 2.120158109 |
| 21704066 | INVNEIFYDLVR                   |                  | RAS-related protein-1a [Mus musculus]                                                            | 1494.8044 | 64.98  | 0.89470507  |
| 22165384 | INVYYNEATGK                    |                  | tubulin, beta, 2 [Mus musculus]                                                                  | 1328.6515 | 64.03  | 2.858943884 |
| 31980648 | IPSAVGYQPTLATDMGTMQER          |                  | ATP synthase, H+ transporting mitochondrial F1 complex, beta subunit [Mus musculus]              | 2266.092  | 92.21  | 1.606227937 |
| 20137008 | IQAIELEDLLR                    |                  | biglycan [Mus musculus]                                                                          | 1312.7533 | 47.57  | 1.19498066  |
| 46593021 | IQEVDAQMLR                     |                  | ubiquinol-cytochrome c reductase core protein 1 [Mus musculus]                                   | 1202.6198 | 47.5   | 1.432153328 |
| 6753498  | IQFNESFAEMNR                   |                  | cytochrome c oxidase subunit IV isoform 1 [Mus musculus]                                         | 1485.6903 | 36.8   | 1.724049241 |
| 31559981 | IQIWDTAGQER                    |                  | RAB15, member RAS oncogene family [Mus musculus]                                                 | 1316.6682 | 77.51  | 1.119171359 |
| 31982223 | IQNVVTSFAPQR                   |                  | laminin, beta 2 [Mus musculus]                                                                   | 1359.7382 | 29.48  | 0           |
| 21314832 | IQRPPEDSIQPYEK                 |                  | UDP-glucose pyrophosphorylase 2 [Mus musculus]                                                   | 1699.8704 | 40.14  | 1.240712575 |
| 19526818 | IQTQPGYANTLR                   |                  | solute carrier family 25 (mitochondrial carrier, phosphate carrier), member 3 [Mus musculus]     | 1361.7269 | 58.41  | 1.606962353 |
| 31981246 | IQTYLESTKPIIDLYEEMGK           |                  | UMP-CMP kinase [Mus musculus]                                                                    | 2371.1802 | 21.3   | 0           |
| 63476037 | ISCSGNQLPTVLR                  |                  | PREDICTED: procollagen, type VI, alpha 3 [Mus musculus]                                          | 1274.6552 | 38.67  | 0.532180162 |
| 22165384 | ISEQFTAMFR                     |                  | tubulin, beta, 2 [Mus musculus]                                                                  | 1229.6132 | 70.21  | 1.234454262 |
| 12963615 | ISEQFTAMFR                     |                  | tubulin, beta 3 [Mus musculus]                                                                   | 1229.6132 | 70.21  | 1.234454262 |
| 31981939 | ISEQFTAMFR                     |                  | tubulin, beta 4 [Mus musculus]                                                                   | 1229.6132 | 70.21  | 1.234454262 |
| 7106439  | ISEQFTAMFR                     |                  | tubulin, beta 5 [Mus musculus]                                                                   | 1229.6132 | 70.21  | 1.234454262 |
| 21746161 | ISEQFTAMFR                     |                  | tubulin, beta [Mus musculus]                                                                     | 1229.6132 | 70.21  | 1.234454262 |
| 22122523 | ISFDLAEYADVDVGVGTLR            |                  | GDP-mannose 4, 6-dehydratase [Mus musculus]                                                      | 2042.0051 | 38     | 0           |
| 34328206 | ISFPAVQAAPSFSNSFPK             |                  | tryptophanyl-tRNA synthetase [Mus musculus]                                                      | 1894.9628 | 43.19  | 2.292456119 |
| 21361209 | ISGLIYEETR                     |                  | germinal histone H4 [Mus musculus]                                                               | 1180.6243 | 65     | 0.763074096 |
| 31982755 | ISLPLPTFSSLNLR                 |                  | vimentin [Mus musculus]                                                                          | 1557.9039 | 47.6   | 1.215236995 |
| 63476037 | ISLSPEVYVSVSTFR                |                  | PREDICTED: procollagen, type VI, alpha 3 [Mus musculus]                                          | 1747.8965 | 49.69  | 0.62312095  |
| 29244556 | ISMSHEEEPLGTAGPLALAR           |                  | GDP-mannose pyrophosphorylase B [Mus musculus]                                                   | 2079.0605 | 30.13  | 0           |
| 33563256 | ISQNTNIPTQDDVLR                |                  | guanine nucleotide binding protein, alpha inhibiting 3 [Mus musculus]                            | 1775.9348 | 27.33  | 1.250420434 |
| 6678499  | ISSINSISALCEATGADVEEVATAIGMDQR |                  | UDP-glucose dehydrogenase [Mus musculus]                                                         | 3051.4585 | 47.2   | 3.120976195 |
| 6677813  | ISSLLEEQFQQGK                  |                  | ribosomal protein S8 [Mus musculus]                                                              | 1506.7709 | 55.1   | 1.097101856 |
| 31981679 | ISSVQSIVPALAIANHR              |                  | heat shock protein 1 (chaperonin) [Mus musculus]                                                 | 1905.0544 | 41.49  | 1.539819259 |
| 6753320  | ISTPVDVNNR                     |                  | chaperonin subunit 3 (gamma) [Mus musculus]                                                      | 1114.5883 | 32     | 1.086736845 |
| 31543113 | ISTSLPVLDLIDAIQPGSINYDLLK      |                  | lymphocyte cytosolic protein 1 [Mus musculus]                                                    | 2698.4827 | 32.24  | 1.137038489 |
| 7106439  | ISVYYNEATGK                    |                  | tubulin, beta 5 [Mus musculus]                                                                   | 1301.6416 | 59.91  | 3.18479669  |
| 31982522 | ITEIYEGTSEIQR                  |                  | acyl-Coenzyme A dehydrogenase, short chain [Mus musculus]                                        | 1538.7563 | 42.47  | 1.474029348 |

|          |                              |                  |                                                                                                    |           |        |             |
|----------|------------------------------|------------------|----------------------------------------------------------------------------------------------------|-----------|--------|-------------|
| 6679291  | ITLPVDFVTADKFDENAK           |                  | phosphoglycerate kinase 1 [Mus musculus]                                                           | 2023.0303 | 46.03  | 1.341277301 |
| 34328204 | ITPAHDQNDYEVGGQR             |                  | valyl-tRNA synthetase 2 [Mus musculus]                                                             | 1742.816  | 57.17  | 0.950180776 |
| 31981722 | ITPSYVAFTPEGER               |                  | heat shock 70kD protein 5 (glucose-regulated protein) [Mus musculus]                               | 1566.7898 | 74.96  | 1.037069572 |
| 6755787  | IWAERPGTNSTGPGMAPPR          |                  | tripartite motif protein 28 [Mus musculus]                                                         | 2005.0403 | 34.61  | 1.383218888 |
| 21450277 | IVEIPFNSTNK                  |                  | Na+/K+ -ATPase alpha 1 subunit [Mus musculus]                                                      | 1261.6621 | 34.08  | 1.43142364  |
| 33598964 | IVFQEFR                      |                  | myosin heavy chain 10, non-muscle [Mus musculus]                                                   | 938.5105  | 24.56  | 0.95599647  |
| 7305295  | IVFQEFR                      |                  | myosin, heavy polypeptide 11, smooth muscle [Mus musculus]                                         | 938.5105  | 24.56  | 0.95599647  |
| 6753010  | IVFDPPLTVR                   |                  | anterior gradient 2 [Mus musculus]                                                                 | 1245.7207 | 50.41  | 1.041578728 |
| 7305619  | IVILPDYLEIAR                 |                  | ubiquitin specific protease 5 (isopeptidase T) [Mus musculus]                                      | 1414.8289 | 22.17  | 0           |
| 51491845 | IVLDNSVFSEHR                 |                  | clathrin, heavy polypeptide (Hc) [Mus musculus]                                                    | 1415.7275 | 46.98  | 1.319194681 |
| 6754482  | IVLQIDNAR                    |                  | keratin complex 1, acidic, gene 18 [Mus musculus]                                                  | 1041.6074 | 37.17  | 1.79187737  |
| 6680606  | IVLQIDNAR                    |                  | keratin complex 1, acidic, gene 19 [Mus musculus]                                                  | 1041.6074 | 37.17  | 1.79187737  |
| 24418919 | IVNGWQVEEADDWLR              |                  | brain glycogen phosphorylase [Mus musculus]                                                        | 1829.8833 | 27.66  | 1.959270338 |
| 63746482 | IVSPSGAAVPCK                 |                  | PREDICTED: filamin, alpha [Mus musculus]                                                           | 1128.6106 | 35.29  | 0           |
| 18079339 | IVYGHLDPPANQEIER             |                  | aconitase 2, mitochondrial [Mus musculus]                                                          | 1868.9226 | 49.98  | 1.504568438 |
| 8567336  | IWALGGVTSR                   |                  | chloride channel calcium activated 3 [Mus musculus]                                                | 1174.6373 | 74.91  | 0.243298564 |
| 6678483  | IYDDFFQNLGDGVANALDNIDAR      |                  | ubiquitin-activating enzyme E1, Chr X [Mus musculus]                                               | 2614.2122 | 59.85  | 1.258659754 |
| 33859554 | IYELAAGGTAVGTGLNTR           |                  | fumarate hydratase 1 [Mus musculus]                                                                | 1763.9337 | 28.93  | 1.922123377 |
| 22164798 | IYVVDVGSEPR                  |                  | selenium binding protein 1 [Mus musculus]                                                          | 1233.6523 | 32.5   | 2.804196821 |
| 7305295  | KATLQAEQLSNELATER            |                  | myosin, heavy polypeptide 11, smooth muscle [Mus musculus]                                         | 1901.9949 | 105.76 | 0.846684596 |
| 6671507  | KDLYANNVLSGGTTMYPGIADR       | Deamidation (NQ) | actin, alpha 2, smooth muscle, aorta [Mus musculus]                                                | 2356.1931 | 157.65 | 0.396156614 |
| 6671507  | KDLYANNVLSGGTTMYPGIADR       |                  | actin, alpha 2, smooth muscle, aorta [Mus musculus]                                                | 2357.1589 | 84.07  | 0           |
| 6671509  | KDLYANTVLSGGTTMYPGIADR       |                  | actin, beta, cytoplasmic [Mus musculus]                                                            | 2343.1694 | 161.91 | 0.959265713 |
| 29789191 | KEDGTFYEFGGDIPPEAPER         |                  | asparaginyl-tRNA synthetase [Mus musculus]                                                         | 2214.9995 | 66.78  | 1.460324723 |
| 30425112 | KEEEEEEEYDEGSNLKR            |                  | hypothetical protein LOC109154 [Mus musculus]                                                      | 2241.9685 | 59.4   | 0           |
| 20874851 | KESYSVYVYK                   |                  | PREDICTED: similar to histone H2b-616 [Mus musculus]                                               | 1265.6444 | 57.59  | 0.456888266 |
| 33598964 | KFDQLLAEEK                   |                  | myosin heavy chain 10, non-muscle [Mus musculus]                                                   | 1220.644  | 40.87  | 0           |
| 7305295  | KFDQLLAEEK                   |                  | myosin, heavy polypeptide 11, smooth muscle [Mus musculus]                                         | 1220.644  | 40.87  | 0           |
| 20137006 | KFDQLLAEEK                   |                  | myosin, heavy polypeptide 9, non-muscle [Mus musculus]                                             | 1220.644  | 40.87  | 0           |
| 29336026 | KFDQLLAEEK                   |                  | nonmuscle myosin heavy chain [Mus musculus]                                                        | 1220.644  | 40.87  | 0           |
| 31543942 | KIDAAQNWLADPNGGPEGEEQIR      |                  | vinculin [Mus musculus]                                                                            | 2508.2124 | 67.31  | 0.703959722 |
| 6753262  | KLEVEANNAFDQYR               |                  | capping protein (actin filament) muscle Z-line, beta [Mus musculus]                                | 1696.8225 | 25.77  | 0.914374122 |
| 6679567  | KLEVNEAELLR                  |                  | polymerase I and transcript release factor [Mus musculus]                                          | 1313.7406 | 29.18  | 0           |
| 7305295  | KLEVQLQLQSK                  |                  | myosin, heavy polypeptide 11, smooth muscle [Mus musculus]                                         | 1428.803  | 65.68  | 0           |
| 6753066  | KLLETEEEAFLGGATPR            |                  | amine oxidase, copper containing 3 [Mus musculus]                                                  | 2029.0302 | 27.82  | 0           |
| 31981246 | KNPDSQYGELIEK                |                  | UMP-CMP kinase [Mus musculus]                                                                      | 1520.766  | 39.83  | 0           |
| 6680836  | KPEDWDEEMDGEWPPVIQNPYK       |                  | calreticulin [Mus musculus]                                                                        | 2960.3015 | 60.66  | 1.039955851 |
| 6677871  | KPELPDGDNDVADISNR            |                  | scinderin [Mus musculus]                                                                           | 2184.0088 | 102.48 | 0.595674987 |
| 31981722 | KSDIDEIVLVGGSTR              |                  | heat shock 70kD protein 5 (glucose-regulated protein) [Mus musculus]                               | 1588.8564 | 33.29  | 0           |
| 8567336  | KYPTDGSEIVLLTDGEDNTISSCFDLVK |                  | chloride channel calcium activated 3 [Mus musculus]                                                | 3059.4844 | 34.51  | 0           |
| 50355692 | LADALQELR                    |                  | lamin A isoform A [Mus musculus]                                                                   | 1028.569  | 30.14  | 1.478371519 |
| 31982522 | LADMALALESAR                 |                  | acyl-Coenzyme A dehydrogenase, short chain [Mus musculus]                                          | 1260.6581 | 32.57  | 0           |
| 13624315 | LAELEAALQR                   |                  | keratin complex 2, basic, gene 8 [Mus musculus]                                                    | 1113.6292 | 60.51  | 1.732069853 |
| 51491845 | LAELEEFINGPNNAHIQVQVGR       |                  | clathrin, heavy polypeptide (Hc) [Mus musculus]                                                    | 2464.2036 | 25.57  | 0           |
| 31560731 | LAEMPADSGYPAYLGAR            |                  | ATPase, H+ transporting, V1 subunit A, isoform 1 [Mus musculus]                                    | 1781.8676 | 28.77  | 0           |
| 6753010  | LAEQFVLLNLVYETTDK            |                  | anterior gradient 2 [Mus musculus]                                                                 | 1996.0712 | 50.53  | 1.748129451 |
| 6678483  | LAGTQPLEVLEAVQR              |                  | ubiquitin-activating enzyme E1, Chr X [Mus musculus]                                               | 1623.9061 | 58.64  | 1.3052502   |
| 23956166 | LALSQNQQSSGAAGPTGK           |                  | cisplatin resistance-associated overexpressed protein [Mus musculus]                               | 1714.8773 | 71.43  | 45.64949826 |
| 51770896 | LAMQEFMILPVGASSFR            |                  | PREDICTED: similar to Alpha enolase (2-phospho-D-glycerate hydro-lyase) (Non-neural enolase) (NNE) | 1896.9668 | 56.58  | 1.429799366 |
| 6679687  | LAPEYEAATR                   |                  | glucose regulated protein [Mus musculus]                                                           | 1191.5892 | 36.52  | 0           |
| 31981562 | LAPITSDPTEAAAVGAVEASFK       |                  | pyruvate kinase 3 [Mus musculus]                                                                   | 2145.1099 | 111.7  | 1.579746237 |
| 19527018 | LAQDFLDSQNL SAYNTR           |                  | dipeptidylpeptidase III [Mus musculus]                                                             | 1955.9553 | 21.45  | 0           |
| 51770896 | LAQSNWGVVMVSHR               |                  | PREDICTED: similar to Alpha enolase (2-phospho-D-glycerate hydro-lyase) (Non-neural enolase) (NNE) | 1541.7662 | 64.27  | 1.345658964 |
| 51770896 | LAQSNWGVVMVSHR               | Deamidation (NQ) | PREDICTED: similar to Alpha enolase (2-phospho-D-glycerate hydro-lyase) (Non-neural enolase) (NNE) | 1542.7671 | 58.94  | 1.55025085  |
| 11230802 | LASDLLEWIR                   |                  | actinin alpha 4 [Mus musculus]                                                                     | 1215.6799 | 49.53  | 1.054408789 |
| 33186863 | LATQLTGPVMPPIR               |                  | ribosomal protein L13 [Mus musculus]                                                               | 1396.8054 | 28.33  | 1.245334613 |
| 10946574 | LAVEALSSLDGDLSGR             |                  | creatine kinase, brain [Mus musculus]                                                              | 1602.822  | 38.78  | 0           |
| 63650229 | LAVNMVPPFR                   |                  | PREDICTED: similar to TUBULIN BETA CHAIN (T BETA-15) [Mus musculus]                                | 1143.6359 | 36.7   | 1.329418206 |
| 22165384 | LAVNMVPPFR                   |                  | tubulin, beta, 2 [Mus musculus]                                                                    | 1143.6359 | 36.7   | 1.329418206 |
| 12963615 | LAVNMVPPFR                   |                  | tubulin, beta 3 [Mus musculus]                                                                     | 1143.6359 | 36.7   | 1.329418206 |

|          |                                    |                    |                                                                              |           |        |             |
|----------|------------------------------------|--------------------|------------------------------------------------------------------------------|-----------|--------|-------------|
| 31981939 | LAVNMVPPFR                         |                    | tubulin, beta 4 [Mus musculus]                                               | 1143.6359 | 36.7   | 1.329418206 |
| 7106439  | LAVNMVPPFR                         |                    | tubulin, beta 5 [Mus musculus]                                               | 1143.6359 | 36.7   | 1.329418206 |
| 27754056 | LAVNMVPPFR                         |                    | tubulin, beta 6 [Mus musculus]                                               | 1143.6359 | 36.7   | 1.329418206 |
| 21746161 | LAVNMVPPFR                         |                    | tubulin, beta [Mus musculus]                                                 | 1143.6359 | 36.7   | 1.329418206 |
| 33859506 | LCAIPNLR                           |                    | albumin 1 [Mus musculus]                                                     | 899.5132  | 29.86  | 2.061104066 |
| 6671507  | LCYVALDFENEMATAASSSSLEK            |                    | actin, alpha 2, smooth muscle, aorta [Mus musculus]                          | 2479.1545 | 29.43  | 0           |
| 6671507  | LCYVALDFENEMATAASSSSLEK            | Deamidation (NQ)   | actin, alpha 2, smooth muscle, aorta [Mus musculus]                          | 2480.1567 | 21.59  | 0           |
| 6671509  | LCYVALDFEQEMATAASSSSLEK            |                    | actin, beta, cytoplasmic [Mus musculus]                                      | 2493.1416 | 33.84  | 0           |
| 63652452 | LCYVALDFEQEMATAASSSSLEK            |                    | PREDICTED: similar to cytoplasmic beta-actin [Mus musculus]                  | 2493.1416 | 33.84  | 0           |
| 6671509  | LCYVALDFEQEMATAASSSSLEK            | Deamidation (NQ)   | actin, beta, cytoplasmic [Mus musculus]                                      | 2494.1653 | 24.21  | 0           |
| 63652452 | LCYVALDFEQEMATAASSSSLEK            | Deamidation (NQ)   | PREDICTED: similar to cytoplasmic beta-actin [Mus musculus]                  | 2494.1653 | 24.21  | 0           |
| 7305295  | LDAFLVLEQLR                        |                    | myosin, heavy polypeptide 11, smooth muscle [Mus musculus]                   | 1316.7612 | 41.65  | 0.99233475  |
| 21312950 | LDDLINWAR                          |                    | NADH dehydrogenase (ubiquinone) Fe-S protein 7 [Mus musculus]                | 1115.5795 | 27.66  | 1.055840433 |
| 30794450 | LDELYGTWR                          |                    | ribosomal protein L4 [Mus musculus]                                          | 1152.5707 | 20.48  | 1.293874842 |
| 31981562 | LDIDSAPITAR                        |                    | pyruvate kinase 3 [Mus musculus]                                             | 1171.6342 | 56.88  | 0           |
| 6677819  | LDILDTAGQEEFGAMR                   |                    | Harvey rat sarcoma oncogene, subgroup R [Mus musculus]                       | 1765.8473 | 26.84  | 0           |
| 6678359  | LDNLVAIFDINR                       |                    | transketolase [Mus musculus]                                                 | 1402.7736 | 62.83  | 0           |
| 14389431 | LDPQNHVLYSNR                       |                    | stress-induced phosphoprotein 1 [Mus musculus]                               | 1455.7375 | 35.67  | 1.64283191  |
| 33859686 | LDQETAQWLR                         |                    | phosphoglucomutase 1 [Mus musculus]                                          | 1259.6617 | 26.92  | 1.798638461 |
| 33563238 | LEAAVAEEAQGEAALNDAK                | Deamidation (NQ)   | keratin complex 2, basic, gene 16 [Mus musculus]                             | 2028.9833 | 41.28  | 1.738102645 |
| 13624315 | LEAELGNMQGLVEDFK                   |                    | keratin complex 2, basic, gene 8 [Mus musculus]                              | 1792.8784 | 76.12  | 1.5355386   |
| 63565108 | LEAELGNMQGLVEDFK                   |                    | PREDICTED: similar to cytokeratin EndoA - mouse [Mus musculus]               | 1792.8784 | 76.12  | 1.5355386   |
| 6755817  | LEDKDDL DVTELSNEELLDQLVR           |                    | thymopoietin [Mus musculus]                                                  | 2701.3191 | 47.45  | 0.783902842 |
| 6679261  | LEEGPPVTTVLTR                      |                    | pyruvate dehydrogenase E1 alpha 1 [Mus musculus]                             | 1411.7826 | 35.57  | 1.506920671 |
| 13624315 | LEGLTDEINFLR                       |                    | keratin complex 2, basic, gene 8 [Mus musculus]                              | 1419.7581 | 82.5   | 1.691685502 |
| 63565108 | LEGLTDEINFLR                       |                    | PREDICTED: similar to cytokeratin EndoA - mouse [Mus musculus]               | 1419.7581 | 82.5   | 1.691685502 |
| 547749   | LENEIQTYR                          |                    | Keratin, type I cytoskeletal 10 (Cytokeratin 10) (K10) (CK 10)               | 1165.5826 | 46.38  | 0.384365916 |
| 21592285 | LEQEIATYR                          |                    | keratin 20 [Mus musculus]                                                    | 1122.5836 | 47.17  | 1.663790979 |
| 6680606  | LEQEIATYR                          |                    | keratin complex 1, acidic, gene 19 [Mus musculus]                            | 1122.5836 | 47.17  | 1.663790979 |
| 27370460 | LEQEIATYR                          |                    | RIKEN cDNA 6330509G02 [Mus musculus]                                         | 1122.5836 | 47.17  | 1.663790979 |
| 21704156 | LEQYTNAIEGTK                       |                    | caldesmon 1 [Mus musculus]                                                   | 1366.6771 | 22.59  | 0           |
| 63565108 | LEVDPNIQAVR                        |                    | PREDICTED: similar to cytokeratin EndoA - mouse [Mus musculus]               | 1253.7026 | 62.5   | 1.784437233 |
| 30911099 | LFDHPEVPTPPESASVSR                 |                    | fatty acid synthase [Mus musculus]                                           | 1964.9691 | 36.27  | 1.70769832  |
| 7305173  | LFDAQFGVPR                         |                    | heat shock protein 1 [Mus musculus]                                          | 1149.6073 | 51.87  | 0.805691007 |
| 55742711 | LFELEEQDLFR                        |                    | EH-domain containing 2 [Mus musculus]                                        | 1438.725  | 73.25  | 1.251211176 |
| 12963531 | LFVGNLPPDITEEEMR                   |                    | non-POU-domain-containing, octamer binding protein [Mus musculus]            | 1859.9202 | 32.6   | 1.133092983 |
| 12963531 | LFVGNLPPDITEEEMR                   | Deamidation (NQ)   | non-POU-domain-containing, octamer binding protein [Mus musculus]            | 1860.9269 | 23.36  | 0           |
| 38198665 | LGAAPEEESAIVYAGER                  |                    | p47 protein [Mus musculus]                                                   | 1648.7877 | 55.31  | 2.025351139 |
| 6680163  | LGAGYPMGPFELLDYVGLDTTK             |                    | L-3-hydroxyacyl-Coenzyme A dehydrogenase, short chain [Mus musculus]         | 2357.1726 | 40.04  | 2.838620649 |
| 54607098 | LGANSLDLVVFGR                      |                    | succinate dehydrogenase Fp subunit [Mus musculus]                            | 1473.8451 | 20.88  | 0           |
| 31982755 | LGDLYEEEMR                         |                    | vimentin [Mus musculus]                                                      | 1254.5714 | 57.31  | 1.436972905 |
| 6679291  | LGDVYVNDAFGTAHR                    |                    | phosphoglycerate kinase 1 [Mus musculus]                                     | 1634.7905 | 89.04  | 1.814441012 |
| 136429   | LGEHNIDVLEGNEQFINAAK               |                    | Trypsin precursor                                                            | 2211.1255 | 133.32 | 0           |
| 6678439  | LGEHNINVLEGNQFVDSAK                | 2 Deamidation (NQ) | protease, serine, 2 [Mus musculus]                                           | 2215.0791 | 37.15  | 0           |
| 6755893  | LGEHNINVLEGNQFVNSAK                | Deamidation (NQ)   | trypsin 4 [Mus musculus]                                                     | 2213.0938 | 23.21  | 0           |
| 6680720  | LGEIVTTIPTIGFNVETVEYK              |                    | ADP-ribosylation factor 4 [Mus musculus]                                     | 2323.2312 | 64.06  | 1.502966322 |
| 33859506 | LGEYGFQNAILVR                      |                    | albumin 1 [Mus musculus]                                                     | 1479.7974 | 53.36  | 1.985687037 |
| 10946574 | LGFSEVELVQMVVDGVK                  |                    | creatine kinase, brain [Mus musculus]                                        | 1848.9788 | 36.84  | 2.114176565 |
| 33859514 | LGGNYGPTVAVQR                      | Deamidation (NQ)   | branched chain aminotransferase 2, mitochondrial [Mus musculus]              | 1332.6667 | 21.47  | 0           |
| 6754254  | LGLGIDEDDPTVDDTSAAVTEEMPPLEGDDTDSR |                    | heat shock protein 1, alpha [Mus musculus]                                   | 3575.5293 | 100.69 | 1.465199217 |
| 40556608 | LGLGIDEDEVTAEEPSAAVPEIPPLEGDEDASR  |                    | heat shock protein 1, beta [Mus musculus]                                    | 3535.6418 | 98.75  | 1.520898496 |
| 6678097  | LGMTDAFGGR                         |                    | serine (or cysteine) proteinase inhibitor, clade B, member 6a [Mus musculus] | 1024.4916 | 27.49  | 2.030175247 |
| 6678359  | LQSQDPAPLQHQQVDIYQK                |                    | transketolase [Mus musculus]                                                 | 2037.0483 | 52.43  | 1.336305156 |
| 25020120 | LGSQATGVQAGQAGQLDTESTLGR           |                    | PREDICTED: laminin, alpha 5 [Mus musculus]                                   | 2488.2537 | 38.44  | 0           |
| 7305505  | LGSVTHVTTFSHASPGNR                 |                    | smoothelin [Mus musculus]                                                    | 1867.9495 | 33.18  | 0.866030144 |
| 31560611 | LGTDQPLDQATISLQMGTKNK              |                    | calponin 1 [Mus musculus]                                                    | 2131.0361 | 58.13  | 0           |
| 6753428  | LGYILTCPSNLGTGLR                   |                    | creatine kinase, mitochondrial 1, ubiquitous [Mus musculus]                  | 1677.9033 | 30.79  | 2.540280914 |
| 31542159 | LHEFTISGTTYPEGEVR                  |                    | ATPase, Ca++ transporting, ubiquitous [Mus musculus]                         | 2036.9818 | 39.8   | 0.602968696 |
| 6755901  | LIGQIVSSITASLR                     |                    | tubulin, alpha 1 [Mus musculus]                                              | 1457.8799 | 79.4   | 1.103708969 |
| 6678573  | LIQWNGPESNR                        |                    | villin 1 [Mus musculus]                                                      | 1426.7501 | 33.19  | 1.671286402 |



|          |                                |                                                                                                     |           |        |             |
|----------|--------------------------------|-----------------------------------------------------------------------------------------------------|-----------|--------|-------------|
| 22164798 | LILPGLISSR                     | selenium binding protein 1 [Mus musculus]                                                           | 1068.6782 | 29.96  | 3.439664517 |
| 34740335 | LISQIVSSITASLR                 | tubulin, alpha 2 [Mus musculus]                                                                     | 1487.8843 | 48.93  | 1.43421943  |
| 6678467  | LISQIVSSITASLR                 | tubulin, alpha 4 [Mus musculus]                                                                     | 1487.8843 | 48.93  | 1.43421943  |
| 6678469  | LISQIVSSITASLR                 | tubulin, alpha 6 [Mus musculus]                                                                     | 1487.8843 | 48.93  | 1.43421943  |
| 6679937  | LISWYDNEYGYNSNR                | similar to glyceraldehyde-3-phosphate dehydrogenase [Mus musculus]                                  | 1779.8013 | 72.77  | 1.151184048 |
| 547749   | LKYENEVALR                     | Keratin, type I cytoskeletal 10 (Cytokeratin 10) (K10) (CK 10)                                      | 1234.6862 | 24.66  | 0.354791497 |
| 27370092 | LLDAVDTYIPVPTR                 | Tu translation elongation factor, mitochondrial [Mus musculus]                                      | 1572.8685 | 52.67  | 1.581420001 |
| 9790261  | LLDSLEPPGEPGPSTSPENDVTDGR      | Trk-fused gene [Mus musculus]                                                                       | 2692.2837 | 29.46  | 1.453764206 |
| 31981828 | LLELGPKEVAQQTR                 | coatamer protein complex subunit alpha [Mus musculus]                                               | 1678.9454 | 34.79  | 1.444173113 |
| 6753066  | LLETEEEAAFLGGATPR              | amine oxidase, copper containing 3 [Mus musculus]                                                   | 1900.9595 | 69.79  | 0           |
| 17647499 | LLGNAIVILVGHHLGK               | hemoglobin, beta adult minor chain [Mus musculus]                                                   | 1654.0262 | 88.52  | 2.757237796 |
| 31982300 | LLGNMIVILVGHHLGK               | hemoglobin, beta adult major chain [Mus musculus]                                                   | 1714.0223 | 24.8   | 0           |
| 6671672  | LLLNNNDLLLR                    | capping protein (actin filament) muscle Z-line, alpha 2 [Mus musculus]                              | 1197.6995 | 32.04  | 1.954498693 |
| 20874851 | LLLPGELAK                      | PREDICTED: similar to histone H2b-616 [Mus musculus]                                                | 953.6169  | 56.31  | 0.609843635 |
| 63556656 | LLNPQGAIK                      | PREDICTED: RIKEN cDNA A430096B05 gene [Mus musculus]                                                | 981.5872  | 38.5   | 0.28669183  |
| 63704924 | LLQDFFNGR                      | PREDICTED: heat shock protein 1B [Mus musculus]                                                     | 1109.5746 | 24.71  | 0.978132989 |
| 31982755 | LLQDSVDFSLADAINTEFK            | vimentin [Mus musculus]                                                                             | 2126.0603 | 25.97  | 0           |
| 24418919 | LLSLVDDEAFIR                   | brain glycogen phosphorylase [Mus musculus]                                                         | 1390.754  | 41.82  | 1.184071534 |
| 63562740 | LLTSAAFEDCQTR                  | PREDICTED: similar to secreted gel-forming mucin [Mus musculus]                                     | 1454.7085 | 28.6   | 0.538511667 |
| 31982300 | LLVVYPWTQR                     | hemoglobin, beta adult major chain [Mus musculus]                                                   | 1274.7285 | 27.03  | 0           |
| 17647499 | LLVVYPWTQR                     | hemoglobin, beta adult minor chain [Mus musculus]                                                   | 1274.7285 | 27.03  | 0           |
| 51491845 | LLYNNVSNFGR                    | clathrin, heavy polypeptide (Hc) [Mus musculus]                                                     | 1296.6693 | 42.92  | 1.321539539 |
| 6755809  | LNEAAAGLNQAATELVQASR           | talin 1 [Mus musculus]                                                                              | 2027.0511 | 72.51  | 0.954252086 |
| 45387933 | LNIQPSETDYAVDIR                | UDP-glucose ceramide glucosyltransferase-like 1 [Mus musculus]                                      | 1733.8677 | 45.27  | 1.425989304 |
| 63476037 | LNLLDLDYELAEQLDNIAEK           | PREDICTED: procollagen, type VI, alpha 3 [Mus musculus]                                             | 2332.1914 | 96.39  | 0.852385803 |
| 22164798 | LNPNFLVDFGK                    | selenium binding protein 1 [Mus musculus]                                                           | 1263.6559 | 42.43  | 2.765830204 |
| 13384736 | LNTQEIFDDWAR                   | dynein, cytoplasmic, heavy chain 1 [Mus musculus]                                                   | 1507.7297 | 21.66  | 1.145732254 |
| 6754484  | LNVEVDAAPTVDLNR                | keratin complex 1, acidic, gene 1 [Mus musculus]                                                    | 1625.8539 | 71.87  | 0           |
| 33859811 | LPAKPEVSSDEDVQYR               | hydroxyacyl-Coenzyme A dehydrogenase/3-ketoacyl-Coenzyme A thiolase/enoyl-Coenzyme A hydratase (tri | 1832.9106 | 106.24 | 1.567211483 |
| 33859506 | LPCVEDYLSAILNR                 | albumin 1 [Mus musculus]                                                                            | 1605.843  | 102.8  | 1.964816302 |
| 29789080 | LPEAAFLAR                      | coatamer protein complex, subunit beta 2 (beta prime) [Mus musculus]                                | 987.5557  | 24.33  | 1.280287922 |
| 56119103 | LPGQPPASMGK                    | guanosine diphosphate (GDP) dissociation inhibitor 3 [Mus musculus]                                 | 1110.5726 | 24.29  | 1.20780605  |
| 31982472 | LPIGDVATQYFADR                 | chaperonin subunit 7 (eta) [Mus musculus]                                                           | 1565.7946 | 23.86  | 1.594860257 |
| 51873060 | LPLQDVYK                       | eukaryotic translation elongation factor 1 alpha 1 [Mus musculus]                                   | 975.5494  | 48.44  | 0           |
| 63746482 | LPQLPITNFSR                    | PREDICTED: filamin, alpha [Mus musculus]                                                            | 1285.734  | 70.67  | 0.761963349 |
| 19526818 | LPRPPPEMPESLK                  | solute carrier family 25 (mitochondrial carrier, phosphate carrier), member 3 [Mus musculus]        | 1587.8596 | 29.85  | 5.866661955 |
| 21450325 | LPSEGPQPAHVVDGVR               | biliverdin reductase B (flavin reductase (NADPH)) [Mus musculus]                                    | 1756.9424 | 60.53  | 0           |
| 63738313 | LPSGGSPASPTTGSVADIR            | PREDICTED: similar to AHNAK [Mus musculus]                                                          | 1769.877  | 28.21  | 1.09865094  |
| 7949051  | LQAALDNEAGGRPAMEPGNSLDLGGDAAGR | heterogenous nuclear ribonucleoprotein U [Mus musculus]                                             | 2980.4146 | 30.53  | 1.141842541 |
| 31982755 | LQDEIQNMKEEMAR                 | vimentin [Mus musculus]                                                                             | 1734.8197 | 66.41  | 1.26031052  |
| 34328286 | LQDPFVSVYR                     | succinate dehydrogenase Ip subunit [Mus musculus]                                                   | 1124.5753 | 30.92  | 1.755145386 |
| 6678573  | LQEENQVITPR                    | villin 1 [Mus musculus]                                                                             | 1326.7096 | 42.57  | 1.768956405 |
| 50355692 | LQEKEDLQELNDR                  | lamin A isoform A [Mus musculus]                                                                    | 1629.8119 | 53.35  | 1.122513493 |
| 8393988  | LQEQLGNDVVEK                   | phosphomannomutase 2 [Mus musculus]                                                                 | 1371.6978 | 29.41  | 5.30523652  |
| 34594657 | LQGPQTSAEVYR                   | glycerol-3-phosphate dehydrogenase 1-like [Mus musculus]                                            | 1348.6824 | 24.7   | 1.554148156 |
| 10946940 | LQIWDTAGQESFR                  | RAB2, member RAS oncogene family [Mus musculus]                                                     | 1550.7612 | 74.11  | 1.157106661 |
| 21450625 | LQMEAPHIIVGTPGR                | eukaryotic translation initiation factor 4A1 [Mus musculus]                                         | 1618.8771 | 52.63  | 1.375565003 |
| 7305295  | LQNEVESVTGMLNEAEGK             | myosin, heavy polypeptide 11, smooth muscle [Mus musculus]                                          | 1947.9384 | 100.2  | 0.70004259  |
| 38089265 | LQNTGVADGYPYR                  | PREDICTED: palladin [Mus musculus]                                                                  | 1389.707  | 42.53  | 1.228434259 |
| 20137006 | LQQLDDLLVDLHQK                 | myosin, heavy polypeptide 9, non-muscle [Mus musculus]                                              | 1950.9907 | 20.8   | 2.258281482 |
| 7305295  | LQQLDDLLVVDLNDQR               | myosin, heavy polypeptide 11, smooth muscle [Mus musculus]                                          | 1912.9648 | 131.99 | 0.895032163 |
| 19527026 | LQQLPADFGK                     | hypothetical protein LOC98238 [Mus musculus]                                                        | 1144.6122 | 25.08  | 1.424133143 |
| 63489754 | LQVSDENYKDPNTLQGK              | PREDICTED: similar to Spectrin alpha chain, brain (Spectrin, non-erythroid alpha chain) (Alpha-II s | 2019.9921 | 32.41  | 1.989508429 |
| 63746482 | LQVEPAVDTSVGVQCYGPIEGQGVFR     | PREDICTED: filamin, alpha [Mus musculus]                                                            | 2706.3164 | 35.61  | 0.642195206 |
| 31980942 | LQVSSQEDITK                    | Inositol (myo)-1(or 4)-monophosphatase 1 [Mus musculus]                                             | 1288.6746 | 68.92  | 0           |
| 63476037 | LSDAGITPLFLTQSQEDR             | PREDICTED: procollagen, type VI, alpha 3 [Mus musculus]                                             | 1862.9458 | 83.7   | 0.504561092 |
| 63489759 | LSDDNTIGQEEIQQR                | PREDICTED: spectrin alpha 2 [Mus musculus]                                                          | 1745.8164 | 37.31  | 0           |
| 6754206  | LSEILIDILTR                    | hexokinase 1 [Mus musculus]                                                                         | 1400.8051 | 54.15  | 1.689574736 |
| 6671666  | LSDLLAPISEQIQEVITFR            | CAP, adenylate cyclase-associated protein 1 [Mus musculus]                                          | 2172.1917 | 87.14  | 1.320525587 |
| 13385006 | LSDYFPKYPNPEAAR                | cytochrome c-1 [Mus musculus]                                                                       | 1864.9257 | 48.32  | 1.491135024 |

Deamidation (NQ)

|          |                           |                                                                                                     |           |        |             |
|----------|---------------------------|-----------------------------------------------------------------------------------------------------|-----------|--------|-------------|
| 23956150 | LSFYETGEIPR               | nucleolar protein 5A [Mus musculus]                                                                 | 1311.6459 | 25.19  | 0           |
| 7948997  | LSGGIDFNQPLVITR           | PDZ and LIM domain 3 [Mus musculus]                                                                 | 1629.9019 | 30.52  | 1.038303854 |
| 11230802 | LSGSNPYTTVTPQIINSK        | actinin alpha 4 [Mus musculus]                                                                      | 1920.0022 | 40.89  | 1.524073256 |
| 6671549  | LSILYPATTGR               | peroxiredoxin 6 [Mus musculus]                                                                      | 1191.6813 | 42.06  | 3.010867926 |
| 21450277 | LSLDELHR                  | Na+/K+ -ATPase alpha 1 subunit [Mus musculus]                                                       | 982.5327  | 26.12  | 2.297925566 |
| 63641940 | LSLQDAVNQGLIDQDMATR       | PREDICTED: desmoplakin [Mus musculus]                                                               | 2088.0393 | 22.81  | 1.770206419 |
| 11230802 | LSNRPAFMPSEGR             | actinin alpha 4 [Mus musculus]                                                                      | 1461.7306 | 27.8   | 0.773954353 |
| 6755787  | LSPPYSSPQEFAQDVGR         | tripartite motif protein 28 [Mus musculus]                                                          | 1877.9098 | 37.48  | 1.069983548 |
| 6755967  | LSQNNFALGYK               | voltage-dependent anion channel 3 [Mus musculus]                                                    | 1254.6482 | 44.06  | 2.443712797 |
| 33859506 | LSQTFPNADFAEITK           | albumin 1 [Mus musculus]                                                                            | 1681.8491 | 74.48  | 2.374850388 |
| 6754556  | LSSEMNTSTVNSAR            | lamin B1 [Mus musculus]                                                                             | 1496.7085 | 69.79  | 1.007314983 |
| 136429   | LSSPATLNSR                | Trypsin precursor                                                                                   | 1045.5686 | 33.16  | 0           |
| 7305085  | LSTDHPIILYR               | glutamine fructose-6-phosphate transaminase 1 [Mus musculus]                                        | 1327.7391 | 28.04  | 1.375279385 |
| 51491845 | LTDQLPLIIVCDR             | clathrin, heavy polypeptide (Hc) [Mus musculus]                                                     | 1498.8295 | 59.02  | 1.171819291 |
| 6755963  | LTFDSSFSPNTGK             | voltage-dependent anion channel 1 [Mus musculus]                                                    | 1400.6647 | 66.02  | 1.376298457 |
| 51765915 | LTLIDPETLLPR              | PREDICTED: TBP-interacting protein [Mus musculus]                                                   | 1380.8085 | 29.21  | 1.070939112 |
| 63501125 | LTQQAGDLTVPAGGQR          | PREDICTED: ADP-ribosylation factor interacting protein 1 [Mus musculus]                             | 1611.8505 | 39.01  | 1.816200941 |
| 22165384 | LTTPTYGDLNHLVSATMSGVTTCLR | tubulin, beta, 2 [Mus musculus]                                                                     | 2651.321  | 110.01 | 1.056968074 |
| 31981939 | LTTPTYGDLNHLVSATMSGVTTCLR | tubulin, beta 4 [Mus musculus]                                                                      | 2651.321  | 110.01 | 1.056968074 |
| 7106439  | LTTPTYGDLNHLVSATMSGVTTCLR | tubulin, beta 5 [Mus musculus]                                                                      | 2651.321  | 110.01 | 1.056968074 |
| 21746161 | LTTPTYGDLNHLVSATMSGVTTCLR | tubulin, beta [Mus musculus]                                                                        | 2651.321  | 110.01 | 1.056968074 |
| 51556274 | LVAGEMGQNEPDDGGQR         | hydroxyacyl-Coenzyme A dehydrogenase type II [Mus musculus]                                         | 1785.8263 | 65.2   | 1.391064936 |
| 13385472 | LVAIVDVIDQNR              | ribosomal protein L14 [Mus musculus]                                                                | 1354.7668 | 39.89  | 1.198380353 |
| 6679805  | LVIPSELGYGER              | FK506 binding protein 2 [Mus musculus]                                                              | 1332.7261 | 25.87  | 0.685444572 |
| 6755100  | LVKPGNQNTQVTEAWNK         | proliferation-associated 2G4 [Mus musculus]                                                         | 1927.0083 | 41.89  | 1.768096463 |
| 31980648 | LVLEVAQHLGESTVR           | ATP synthase, H+ transporting mitochondrial F1 complex, beta subunit [Mus musculus]                 | 1650.9167 | 30.81  | 0.994708014 |
| 6755714  | LVNSLYPEGSKPVK            | transgelin [Mus musculus]                                                                           | 1530.8572 | 55.26  | 0.611087443 |
| 31981273 | LVPDMPEVSEVSEQVSSYLSK     | CNDP dipeptidase 2 (metallopeptidase M20 family) [Mus musculus]                                     | 2220.1423 | 58.16  | 0.464012862 |
| 63518159 | LVPLLDTGDIIDGNGSEYR       | PREDICTED: phosphogluconate dehydrogenase [Mus musculus]                                            | 2160.1062 | 89.73  | 1.597638129 |
| 31543942 | LVQAAQMLQSDPYSVPAR        | vinculin [Mus musculus]                                                                             | 1974.0101 | 29.59  | 0.651594003 |
| 6754976  | LVQAFQFTDK                | peroxiredoxin 1 [Mus musculus]                                                                      | 1196.6277 | 45.32  | 0           |
| 31981679 | LVQDVANNTNEEAGDGTATVTLAR  | heat shock protein 1 (chaperonin) [Mus musculus]                                                    | 2560.2476 | 144.47 | 1.646669269 |
| 33859506 | LVQEVTDFAK                | albumin 1 [Mus musculus]                                                                            | 1149.616  | 28.58  | 1.813751776 |
| 24418919 | LVTSGDVVNHDPVVGDR         | brain glycogen phosphorylase [Mus musculus]                                                         | 1891.9678 | 31.56  | 0           |
| 6680047  | LWDLTTGTTTR               | guanine nucleotide binding protein (G protein), beta polypeptide 2 like 1 [Mus musculus]            | 1264.6547 | 67.47  | 1.066421587 |
| 6753010  | LYAYEPSDTALLYDNMK         | anterior gradient 2 [Mus musculus]                                                                  | 2006.9292 | 65.28  | 0.770753682 |
| 19525729 | LYDIEQQQITDALENIR         | crystallin, lamda 1 [Mus musculus]                                                                  | 2062.0269 | 40.87  | 1.412483716 |
| 6753304  | LYGPSVVFADDFVR            | serine (or cysteine) proteinase inhibitor, clade H, member 1 [Mus musculus]                         | 1659.7998 | 41.03  | 1.25849943  |
| 31981722 | LYGSGPPPTGEEDTSEKDEL      | heat shock 70kD protein 5 (glucose-regulated protein) [Mus musculus]                                | 2177.9875 | 68.76  | 0.955727245 |
| 6753266  | LYPIANGNNQSPIDIK          | carbonic anhydrase 1 [Mus musculus]                                                                 | 1756.9203 | 27.86  | 7.26330031  |
| 6753428  | LYPPSAEYPLDR              | creatine kinase, mitochondrial 1, ubiquitous [Mus musculus]                                         | 1420.7195 | 53.08  | 2.049292202 |
| 31542333 | LYQPEYQEVSTEEQR           | hypoxia up-regulated 1 [Mus musculus]                                                               | 1898.8798 | 63.53  | 0.874241944 |
| 31981939 | MAATFIGNSTAIQELFK         | tubulin, beta 4 [Mus musculus]                                                                      | 1857.9453 | 49.27  | 1.221165288 |
| 63530525 | MADAIILAIAGGQELLAQTQK     | PREDICTED: SEC31-like 1 [Mus musculus]                                                              | 2155.1709 | 34.25  | 1.886764922 |
| 20336740 | MAHLFKEK                  | ret finger protein-like 4 [Mus musculus]                                                            | 1003.5573 | 26.1   | 1.249403326 |
| 7305295  | MAQQMLDLEEQLEEEEAAR       | myosin, heavy polypeptide 11, smooth muscle [Mus musculus]                                          | 2263.0417 | 145.24 | 0.986599253 |
| 40068507 | MDENQFVAVTSTNAAK          | collapsin response mediator protein 1 [Mus musculus]                                                | 1725.8175 | 50.48  | 0.784839875 |
| 40254595 | MDENQFVAVTSTNAAK          | dihydropyrimidinase-like 2 [Mus musculus]                                                           | 1725.8175 | 50.48  | 0.784839875 |
| 6681219  | MDENQFVAVTSTNAAK          | dihydropyrimidinase-like 3 [Mus musculus]                                                           | 1725.8175 | 50.48  | 0.784839875 |
| 7305505  | MEPDPAEPPSTTVEANGAEQAR    | smoothelin [Mus musculus]                                                                           | 2368.0864 | 71.08  | 5.942382732 |
| 47578123 | MFTQQQPQELAR              | potassium channel tetramerisation domain containing 12 [Mus musculus]                               | 1476.7366 | 28.48  | 0.580926503 |
| 21450625 | MFVLDEADEMLSR             | eukaryotic translation initiation factor 4A1 [Mus musculus]                                         | 1555.728  | 34.55  | 1.495330608 |
| 23956214 | MGGGGTMMNGDPYSGGQK        | splicing factor proline/glutamine rich (polypyrimidine tract binding protein associated) [Mus muscu | 1801.7487 | 63.38  | 0           |
| 31980685 | MIEQDDFDINTR              | glucosamine [Mus musculus]                                                                          | 1496.6721 | 32.18  | 2.118709093 |
| 11230802 | MLDAEDIVNTARPDEK          | actinin alpha 4 [Mus musculus]                                                                      | 1816.8738 | 41.75  | 1.30814779  |
| 6681157  | MLDMGFEPQIR               | DEAD (Asp-Glu-Ala-Asp) box polypeptide 5 [Mus musculus]                                             | 1336.6436 | 34.45  | 1.156483116 |
| 40068493 | MLDMGFEPQIR               | DEAD box polypeptide 17 isoform 1 [Mus musculus]                                                    | 1336.6436 | 34.45  | 1.156483116 |
| 6753620  | MLDMGFEPQIR               | DEAD/H (Asp-Glu-Ala-Asp/His) box polypeptide 3, X-linked [Mus musculus]                             | 1336.6436 | 34.45  | 1.156483116 |
| 7305505  | MLDQTTNFEER               | smoothelin [Mus musculus]                                                                           | 1383.6332 | 31.77  | 1.251003254 |
| 6679891  | MLDYLQSGGETPQTDIR         | alpha glucosidase 2 alpha neutral subunit [Mus musculus]                                            | 1923.9174 | 63.95  | 1.928082292 |

Oxidation (M)

|          |                               |                  |                                                                                                     |           |        |             |
|----------|-------------------------------|------------------|-----------------------------------------------------------------------------------------------------|-----------|--------|-------------|
| 7305395  | MLGADAVGMSTVPEVIVAR           |                  | purine-nucleoside phosphorylase [Mus musculus]                                                      | 1915.9951 | 24.2   | 0.809089689 |
| 31543942 | MLGQMTDQVADLR                 |                  | vinculin [Mus musculus]                                                                             | 1477.7133 | 24.15  | 0.932307338 |
| 10092608 | MLLADQGGQSWK                  |                  | glutathione S-transferase, pi 1 [Mus musculus]                                                      | 1276.6335 | 37.92  | 1.018589571 |
| 31982290 | MLYDMENPPADDYFGR              |                  | LIM domain containing preferred translocation partner in lipoma [Mus musculus]                      | 1933.8224 | 71.7   | 0.881448212 |
| 8567336  | MNPPRPETSIVQDK                |                  | chloride channel calcium activated 3 [Mus musculus]                                                 | 1661.8044 | 27.56  | 0           |
| 63556656 | MPDGSMLVHVK                   |                  | PREDICTED: RIKEN cDNA A430096B05 gene [Mus musculus]                                                | 1242.6118 | 30     | 0           |
| 6679465  | MPPYDEETAQIIDAQEAR            |                  | protein kinase C substrate 80K-H [Mus musculus]                                                     | 2147.9937 | 63.11  | 1.309731153 |
| 10946972 | MQDQDEADTLQLATAVWNLAVGGEK     |                  | epsilon subunit of coatomer protein complex [Mus musculus]                                          | 2804.3464 | 57.83  | 0           |
| 63489759 | MQHNLEQQIQAR                  |                  | PREDICTED: spectrin alpha 2 [Mus musculus]                                                          | 1495.7488 | 22.3   | 1.222916265 |
| 21704156 | MQNDSAENETAEGEEKR             | Deamidation (NQ) | caldesmon 1 [Mus musculus]                                                                          | 1938.806  | 51.62  | 0           |
| 31982373 | MQQENMKPQEQLTLEPYER           |                  | fibrillarlin [Mus musculus]                                                                         | 2392.1252 | 64.87  | 1.076422637 |
| 8394269  | MQQFDDLFR                     |                  | ST6 (alpha-N-acetyl-neuraminyl-2,3-beta-galactosyl-1,3)-N-acetylglactosaminide alpha-2,6-sialyltra  | 1199.5573 | 31.33  | 1.647960364 |
| 20137006 | MQQNIQELEEQLLEESAR            |                  | myosin, heavy polypeptide 9, non-muscle [Mus musculus]                                              | 2333.0623 | 96.81  | 1.368140889 |
| 50355692 | MQQLDEYQELLDIK                |                  | lamin A isoform A [Mus musculus]                                                                    | 1893.9316 | 73.14  | 1.153583975 |
| 31560689 | MSPEEFTEIMNQR                 |                  | 3-hydroxy-3-methylglutaryl-Coenzyme A synthase 2 [Mus musculus]                                     | 1611.7034 | 38.87  | 7.226964661 |
| 6679108  | MSVQPTVSLGGFEITPPVVLR         |                  | nucleophosmin 1 [Mus musculus]                                                                      | 2227.2158 | 41.04  | 1.225872667 |
| 6679108  | MTDQEAIQDLWQWR                |                  | nucleophosmin 1 [Mus musculus]                                                                      | 1819.8568 | 35.1   | 0.937928043 |
| 56119103 | MTGSEFDFFEEMKR                |                  | guanosine diphosphate (GDP) dissociation inhibitor 3 [Mus musculus]                                 | 1606.7002 | 43.79  | 1.418575559 |
| 6755995  | MTVNESEQLVSCSMDDTVR           |                  | WD repeat domain 1 [Mus musculus]                                                                   | 2143.9294 | 21.52  | 0.729583088 |
| 6678573  | MVDDGSGEVQVWR                 |                  | villin 1 [Mus musculus]                                                                             | 1477.6829 | 57.01  | 1.668454836 |
| 33859811 | MVGVPAAAFDMLTGR               |                  | hydroxyacyl-Coenzyme A dehydrogenase/3-ketoacyl-Coenzyme A thiolase/enoyl-Coenzyme A hydratase (tri | 1595.776  | 32.5   | 2.235469648 |
| 40254595 | MVIPGGIDVHTR                  |                  | dihydropyrimidinase-like 2 [Mus musculus]                                                           | 1294.6711 | 26.7   | 0.922396194 |
| 8393144  | MYDSVLALPGALQATR              |                  | claudin 7 [Mus musculus]                                                                            | 1705.8899 | 38.74  | 1.485351808 |
| 13384828 | MYGADLAPVDFLHASEDAR           |                  | serine (or cysteine) proteinase inhibitor, clade B, member 1a [Mus musculus]                        | 2077.9685 | 60.37  | 1.477043346 |
| 6677871  | MYLETDPDSGR                   |                  | scinderin [Mus musculus]                                                                            | 1168.5322 | 26.53  | 0.316536746 |
| 51766008 | MYQAVLDATQR                   |                  | PREDICTED: myosin IA [Mus musculus]                                                                 | 1295.6418 | 22.45  | 0           |
| 13937355 | MYSYVTEELPQLINANFPVDPQR       |                  | esterase D/formylglutathione hydrolase [Mus musculus]                                               | 2724.333  | 29.62  | 1.48789715  |
| 8567336  | NADVLVSTTSPPLGNDEPYTEHIGACGEK |                  | chloride channel calcium activated 3 [Mus musculus]                                                 | 2917.3665 | 121.83 | 0.220055152 |
| 63476037 | NAGPEFQYIR                    |                  | PREDICTED: procollagen, type VI, alpha 3 [Mus musculus]                                             | 1194.5955 | 57.91  | 0.552932123 |
| 22267442 | NALANPLYCPDYR                 |                  | ubiquinol cytochrome c reductase core protein 2 [Mus musculus]                                      | 1509.7179 | 35.68  | 1.435861207 |
| 46593021 | NALVSHLDGTTTPVCEDIGR          |                  | ubiquinol-cytochrome c reductase core protein 1 [Mus musculus]                                      | 1996.9719 | 29.98  | 0           |
| 63476037 | NANPSELEQIVLSPAFILAAESLPK     |                  | PREDICTED: procollagen, type VI, alpha 3 [Mus musculus]                                             | 2651.4233 | 88.56  | 0           |
| 30023842 | NAPAIIFIDELDAIAPK             |                  | valosin containing protein [Mus musculus]                                                           | 1810.9907 | 104.07 | 0.942462177 |
| 6754256  | NAVITVPAYFNDSQR               |                  | heat shock protein 9A [Mus musculus]                                                                | 1694.8558 | 70.46  | 1.366066202 |
| 18079339 | NAVTFEQFGVPDтар               |                  | aconitase 2, mitochondrial [Mus musculus]                                                           | 1601.814  | 48.2   | 1.621225782 |
| 18079339 | NDANPETHAFVTSPEIVTALAIAGTLK   |                  | aconitase 2, mitochondrial [Mus musculus]                                                           | 2780.4446 | 55.03  | 1.941601824 |
| 31712036 | NDFQLIGIQDGYLSLLQDSGEVR       |                  | eukaryotic translation initiation factor 5A [Mus musculus]                                          | 2580.2778 | 36.64  | 1.866255168 |
| 31560543 | NDFTEEEEAQVR                  |                  | S-phase kinase-associated protein 1A [Mus musculus]                                                 | 1466.6508 | 45.47  | 1.293715178 |
| 9790067  | NDISSHPPVEGSYAPR              |                  | staphylococcal nuclease domain containing 1 [Mus musculus]                                          | 1725.8287 | 51.37  | 1.822876483 |
| 9790247  | NDVFDLSLGISPDLLPDDFVR         |                  | ubiquitin-like 1 (sentrin) activating enzyme subunit 1 [Mus musculus]                               | 2234.106  | 28.05  | 0.765238372 |
| 9790247  | NDVFDLSLGISPDLLPDDFVR         | Deamidation (NQ) | ubiquitin-like 1 (sentrin) activating enzyme subunit 1 [Mus musculus]                               | 2235.0979 | 30.46  | 0           |
| 21313536 | NDVITVQTPAFAESVTEGDVR         |                  | dihydroipoamide S-succinyltransferase (E2 component of 2-oxo-glutarate complex) [Mus musculus]      | 2248.0977 | 43.41  | 1.527405087 |
| 6755929  | NEAIQAAHDSVAQKGQCR            | Deamidation (NQ) | ubiquitin carboxy-terminal hydrolase L1 [Mus musculus]                                              | 1926.8763 | 26.51  | 1.471693836 |
| 6678483  | NEEDATELVGLAQAVNAR            |                  | ubiquitin-activating enzyme E1, Chr X [Mus musculus]                                                | 1899.9403 | 100.58 | 1.288995102 |
| 7305443  | NFGIGQDIQPK                   |                  | ribosomal protein L7a [Mus musculus]                                                                | 1216.6262 | 61.24  | 0           |
| 7949051  | NFILDQTNVSAQAQR               |                  | heterogenous nuclear ribonucleoprotein U [Mus musculus]                                             | 1647.8513 | 74.4   | 1.159541585 |
| 51556274 | NFLASQVFPFSR                  |                  | hydroxyacyl-Coenzyme A dehydrogenase type II [Mus musculus]                                         | 1362.7164 | 27.22  | 1.025710563 |
| 33859490 | NFLTEDSADLSIEAVANEVLK         |                  | laminin B1 subunit 1 [Mus musculus]                                                                 | 2393.155  | 28.35  | 0.573736062 |
| 7305295  | NFMNSPMAQADWVAK               |                  | myosin, heavy polypeptide 11, smooth muscle [Mus musculus]                                          | 1709.7881 | 86.07  | 0.414285769 |
| 22203747 | NFVINVNR                      |                  | procollagen, type VI, alpha 2 [Mus musculus]                                                        | 1074.6003 | 42.94  | 0.74857625  |
| 6681157  | NFYQEHPDLAR                   |                  | DEAD (Asp-Glu-Ala-Asp) box polypeptide 5 [Mus musculus]                                             | 1389.6591 | 49.24  | 2.057490473 |
| 40068493 | NFYVEHPEVAR                   |                  | DEAD box polypeptide 17 isoform 1 [Mus musculus]                                                    | 1360.66   | 23.41  | 1.5236363   |
| 34328108 | NGDRGETGPAGPAGPIGPAGAR        |                  | procollagen, type I, alpha 1 [Mus musculus]                                                         | 1974.9796 | 73.7   | 0           |
| 6754854  | NGFSITGGEFTR                  |                  | nidogen 1 [Mus musculus]                                                                            | 1285.6259 | 24.86  | 0.848321259 |
| 13385078 | NGMMESQLPGR                   |                  | RIKEN cDNA 2210417D09 [Mus musculus]                                                                | 1219.5726 | 20.26  | 0           |
| 63487095 | NGNGGPPYVQAGATLPR             |                  | PREDICTED: catenin src [Mus musculus]                                                               | 1883.9443 | 69.15  | 2.69810789  |
| 46358078 | NGQEETVGSSTQLIR               |                  | response to metastatic cancers 1 [Mus musculus]                                                     | 1717.8768 | 55.32  | 0           |
| 63746482 | NGQHVASSIPVVISQSEIGDASR       |                  | PREDICTED: filamin, alpha [Mus musculus]                                                            | 2448.2351 | 38.9   | 0           |
| 8567336  | NHNQEAQNDQNR                  |                  | chloride channel calcium activated 3 [Mus musculus]                                                 | 1564.6909 | 21.3   | 0           |
| 31560611 | NIIGLQMGTKN                   |                  | calponin 1 [Mus musculus]                                                                           | 1188.6283 | 55.19  | 0           |

|          |                           |                    |                                                                                                         |           |        |             |
|----------|---------------------------|--------------------|---------------------------------------------------------------------------------------------------------|-----------|--------|-------------|
| 27229048 | NIPEDAADMAR               |                    | 5-aminoimidazole-4-carboxamide ribonucleotide formyltransferase/IMP cyclohydrolase [Mus musculus]       | 1202.5519 | 19.05  | 1.080258018 |
| 31543605 | NIQVDSPLYDISR             |                    | ribophorin I [Mus musculus]                                                                             | 1406.6954 | 56.97  | 1.276075445 |
| 33563250 | NISEAEWYK                 |                    | desmin [Mus musculus]                                                                                   | 1268.5837 | 66.94  | 0.512989666 |
| 34996495 | NIVEEIEDLVAR              |                    | ribophorin II [Mus musculus]                                                                            | 1399.7578 | 47.25  | 1.183297323 |
| 33620739 | NKDQGTIEDYVEGLR           |                    | myosin, light polypeptide 6, alkali, smooth muscle and non-muscle [Mus musculus]                        | 1786.8286 | 31.97  | 0           |
| 6755901  | NLDIERPTYTNLNR            |                    | tubulin, alpha 1 [Mus musculus]                                                                         | 1718.8983 | 49.93  | 1.177602611 |
| 34740335 | NLDIERPTYTNLNR            |                    | tubulin, alpha 2 [Mus musculus]                                                                         | 1718.8983 | 49.93  | 1.177602611 |
| 6678467  | NLDIERPTYTNLNR            |                    | tubulin, alpha 4 [Mus musculus]                                                                         | 1718.8983 | 49.93  | 1.177602611 |
| 6678469  | NLDIERPTYTNLNR            |                    | tubulin, alpha 6 [Mus musculus]                                                                         | 1718.8983 | 49.93  | 1.177602611 |
| 58037267 | NLEPEWAAAAATEVK           |                    | protein disulfide isomerase-associated 6 [Mus musculus]                                                 | 1528.7657 | 42.91  | 0           |
| 40254595 | NLHQSGFSLSGAQIDNIPR       |                    | dihydropyrimidinase-like 2 [Mus musculus]                                                               | 2169.0723 | 59.34  | 0.993561099 |
| 6755863  | NLLHVTDGTGVMTR            |                    | tumor rejection antigen gp96 [Mus musculus]                                                             | 1513.7751 | 35.34  | 1.302222477 |
| 20137006 | NLPIYSEEVIMYK             |                    | myosin, heavy polypeptide 9, non-muscle [Mus musculus]                                                  | 1727.8474 | 42.37  | 1.237574491 |
| 31982755 | NLQEAEEWYK                |                    | vimentin [Mus musculus]                                                                                 | 1309.6156 | 31.49  | 0           |
| 6678365  | NLQYYDISAK                |                    | RAN, member RAS oncogene family [Mus musculus]                                                          | 1214.618  | 27.87  | 1.640857325 |
| 23956214 | NLSPYVSNELLEAFSQFGPIER    | Deamidation (NQ)   | splicing factor proline/glutamine rich (polypyrimidine tract binding protein associated) [Mus musculus] | 2640.3076 | 33.37  | 0           |
| 6678359  | NMAEQIIEIYSQVQSK          |                    | transketolase [Mus musculus]                                                                            | 2009.006  | 93.42  | 1.742602813 |
| 29336026 | NMDPLNDNVAALLHQSTDR       |                    | nonmuscle myosin heavy chain [Mus musculus]                                                             | 2124.0242 | 19.25  | 1.849040514 |
| 7305295  | NMDPLNDNVTSLNASSDK        |                    | myosin, heavy polypeptide 11, smooth muscle [Mus musculus]                                              | 2047.9492 | 88.65  | 0.771890494 |
| 7949053  | NMGPGYGGGNYGPGGSGGSGGYGGR |                    | heterogeneous nuclear ribonucleoprotein A2/B1 isoform 1 [Mus musculus]                                  | 2189.9224 | 184.34 | 1.372544153 |
| 7949053  | NMGPGYGGGNYGPGGSGGSGGYGGR | Oxidation (M)      | heterogeneous nuclear ribonucleoprotein A2/B1 isoform 1 [Mus musculus]                                  | 2205.916  | 69.94  | 1.205242496 |
| 30409956 | NMVPQQALVIR               |                    | ATPase, Na+/K+ transporting, alpha 2 polypeptide [Mus musculus]                                         | 1268.7208 | 40.73  | 1.62920184  |
| 21450277 | NMVPQQALVIR               |                    | Na+/K+ -ATPase alpha 1 subunit [Mus musculus]                                                           | 1268.7208 | 40.73  | 1.62920184  |
| 6678145  | NNEDVSIIPPLFTVSVDR        |                    | signal sequence receptor, delta [Mus musculus]                                                          | 2152.1038 | 36.53  | 1.143162364 |
| 31980868 | NNFLEDEPSAQHR             |                    | kallikrein 6 [Mus musculus]                                                                             | 1556.7281 | 32.34  | 0.532267101 |
| 51491845 | NNLAGAEELFAR              |                    | clathrin, heavy polypeptide (Hc) [Mus musculus]                                                         | 1304.662  | 52.14  | 1.478768288 |
| 22203747 | NNYATMRPDSTEIDQDTINR      |                    | procollagen, type VI, alpha 2 [Mus musculus]                                                            | 2354.0813 | 60.81  | 0.532344387 |
| 22203747 | NNYATMRPDSTEIDQDTINR      | Deamidation (NQ)   | procollagen, type VI, alpha 2 [Mus musculus]                                                            | 2355.0618 | 44.83  | 0           |
| 6754254  | NPDDITNEEYGEFYK           |                    | heat shock protein 1, alpha [Mus musculus]                                                              | 1833.792  | 97.66  | 2.342881851 |
| 40556608 | NPDDITQEEYGEFYK           |                    | heat shock protein 1, beta [Mus musculus]                                                               | 1847.8033 | 102.75 | 1.534746666 |
| 63518159 | NPELQNLLDDFFK             |                    | PREDICTED: phosphogluconate dehydrogenase [Mus musculus]                                                | 1705.8774 | 79.96  | 1.137444861 |
| 6678329  | NPLSDPLYDCIFVEGAGLTK      |                    | transglutaminase 2, C polypeptide [Mus musculus]                                                        | 2253.1084 | 48.11  | 0           |
| 63556656 | NPNDLLTAVGGKPEGWK         |                    | PREDICTED: RIKEN cDNA A430096B05 gene [Mus musculus]                                                    | 1797.8839 | 109.25 | 0.37575701  |
| 8567402  | NPPGFVAFVFEFDR            |                    | splicing factor, arginine/serine-rich 3 (SRp20) [Mus musculus]                                          | 1621.7756 | 23.32  | 1.226417834 |
| 22122585 | NPPGFVAFVFEFDR            |                    | splicing factor, arginine/serine-rich 7 [Mus musculus]                                                  | 1621.7756 | 23.32  | 1.226417834 |
| 42734399 | NQALELEQLR                |                    | desmuslin isoform H [Mus musculus]                                                                      | 1213.6538 | 32.95  | 0.720515522 |
| 63489759 | NQALNTDNYGHDLASVQALQR     |                    | PREDICTED: spectrin alpha 2 [Mus musculus]                                                              | 2328.1418 | 98.02  | 1.394829923 |
| 18875324 | NQAPGQPGAQWGSR            |                    | DAZ associated protein 1 [Mus musculus]                                                                 | 1540.7319 | 49.49  | 1.112693927 |
| 33563270 | NQGYDYVVKPR               |                    | oxoglutarate dehydrogenase (lipoamide) [Mus musculus]                                                   | 1402.6831 | 23.29  | 1.702602571 |
| 5477749  | NQILNLTDDNAILLQIDNAR      |                    | Keratin, type I cytoskeletal 10 (Cytokeratin 10) (K10) (CK 10)                                          | 2367.2407 | 24.06  | 0           |
| 31981722 | NQLTSPNPTVFDK             |                    | heat shock 70kD protein 5 (glucose-regulated protein) [Mus musculus]                                    | 1677.8146 | 78.43  | 0.904499745 |
| 6754482  | NQNINLENSLGDVEAR          |                    | keratin complex 1, acidic, gene 18 [Mus musculus]                                                       | 1785.8734 | 123.28 | 1.517498769 |
| 19526884 | NQQDQGLEESPGSWPGAGTIR     |                    | GDP-mannose pyrophosphorylase A [Mus musculus]                                                          | 2227.0437 | 48.92  | 1.258984382 |
| 31981690 | NQVAMNPTNTVFDK            |                    | heat shock protein 8 [Mus musculus]                                                                     | 1649.7915 | 65.8   | 0.952995184 |
| 33563282 | NQYDNDVTVVSPQGR           |                    | proteasome (prosome, macropain) subunit, alpha type 1 [Mus musculus]                                    | 1778.8153 | 47.55  | 2.064047905 |
| 46849705 | NSFMNGSWGAEER             |                    | lectin, galactose binding, soluble 4 [Mus musculus]                                                     | 1484.6396 | 101.59 | 1.90393062  |
| 31543942 | NSKNQGIEEALKNR            | 3 Deamidation (NQ) | vinculin [Mus musculus]                                                                                 | 1603.8137 | 24     | 0           |
| 31981690 | NSLESYAFNMK               |                    | heat shock protein 8 [Mus musculus]                                                                     | 1303.621  | 41.8   | 1.260662503 |
| 33598964 | NSLQEQEEEEEAR             |                    | myosin heavy chain 10, non-muscle [Mus musculus]                                                        | 1718.7411 | 23.99  | 0           |
| 50355692 | NSNLVGAHHEELQQR           |                    | lamin A isoform A [Mus musculus]                                                                        | 1752.8701 | 107.93 | 1.196595596 |
| 22165384 | NSSYFVEWIPNNVK            |                    | tubulin, beta, 2 [Mus musculus]                                                                         | 1696.8464 | 29.19  | 0.216183658 |
| 12963615 | NSSYFVEWIPNNVK            |                    | tubulin, beta 3 [Mus musculus]                                                                          | 1696.8464 | 29.19  | 0.216183658 |
| 31981939 | NSSYFVEWIPNNVK            |                    | tubulin, beta 4 [Mus musculus]                                                                          | 1696.8464 | 29.19  | 0.216183658 |
| 7106439  | NSSYFVEWIPNNVK            |                    | tubulin, beta 5 [Mus musculus]                                                                          | 1696.8464 | 29.19  | 0.216183658 |
| 27754056 | NSSYFVEWIPNNVK            |                    | tubulin, beta 6 [Mus musculus]                                                                          | 1696.8464 | 29.19  | 0.216183658 |
| 21746161 | NSSYFVEWIPNNVK            |                    | tubulin, beta [Mus musculus]                                                                            | 1696.8464 | 29.19  | 0.216183658 |
| 31981562 | NTGIICTIGPASR             |                    | pyruvate kinase 3 [Mus musculus]                                                                        | 1302.6848 | 38.46  | 1.319061727 |
| 33563270 | NTNAGAPPGTAYQSPLSLSR      |                    | oxoglutarate dehydrogenase (lipoamide) [Mus musculus]                                                   | 2002.0042 | 50.47  | 1.447018412 |
| 33859560 | NTNDANSCQIIPQNVNR         |                    | guanosine diphosphate (GDP) dissociation inhibitor 1 [Mus musculus]                                     | 2142.0405 | 63.08  | 1.123462692 |
| 56119103 | NTNDANSCQIIPQNVNR         |                    | guanosine diphosphate (GDP) dissociation inhibitor 3 [Mus musculus]                                     | 2142.0405 | 63.08  | 1.123462692 |

|          |                               |                                                                                                      |           |        |             |
|----------|-------------------------------|------------------------------------------------------------------------------------------------------|-----------|--------|-------------|
| 6754556  | NTSEQDQPMGGWEMIR              | lamin B1 [Mus musculus]                                                                              | 1878.8177 | 72.95  | 0.657305958 |
| 8567336  | NVAILIPESWK                   | chloride channel calcium activated 3 [Mus musculus]                                                  | 1269.7192 | 63.46  | 0.119026001 |
| 6753364  | NVFDEAILAALPEPEPK             | cell division cycle 42 homolog [Mus musculus]                                                        | 1852.9323 | 60.37  | 0.761503845 |
| 6678986  | NVLDTSWPTPPPALR               | myosin IC [Mus musculus]                                                                             | 1663.8597 | 26.92  | 1.175863082 |
| 27370276 | NVLPSLDK                      | hypothetical protein LOC240960 [Mus musculus]                                                        | 885.5111  | 19.24  | 0           |
| 11968166 | NVNGVNYASVTR                  | cathepsin Z preproprotein [Mus musculus]                                                             | 1293.6655 | 26.42  | 0.486063462 |
| 26986563 | NVPVYKPTLDTQR                 | choline dehydrogenase [Mus musculus]                                                                 | 1658.8936 | 23.5   | 1.383469879 |
| 31543976 | NVTELNEPLSNEER                | 3-monooxygenase/tryptophan 5-monooxygenase activation protein, gamma polypeptide [Mus musculus]      | 1643.7933 | 36.45  | 0           |
| 13385168 | NVVSQFVSSMSASADVLAMSK         | ubiquinol-cytochrome c reductase, Rieske iron-sulfur polypeptide 1 [Mus musculus]                    | 2158.0579 | 44.93  | 0           |
| 7305295  | NWQWWW                        | myosin, heavy polypeptide 11, smooth muscle [Mus musculus]                                           | 975.4615  | 25.5   | 0.858468843 |
| 20137006 | NWQWWW                        | myosin, heavy polypeptide 9, non-muscle [Mus musculus]                                               | 975.4615  | 25.5   | 0.858468843 |
| 29336026 | NWQWWW                        | nonmuscle myosin heavy chain [Mus musculus]                                                          | 975.4615  | 25.5   | 0.858468843 |
| 6756033  | NYQQNYQNSSEGEKNEGSESAPEGQAQQR | nuclease sensitive element binding protein 1 [Mus musculus]                                          | 3257.3828 | 112.2  | 1.362078327 |
| 7949053  | NYYEQWGK                      | heterogeneous nuclear ribonucleoprotein A2/B1 isoform 1 [Mus musculus]                               | 1087.4883 | 43.13  | 1.122688706 |
| 51771420 | NYYGYQGGR                     | PREDICTED: hypothetical protein LOC68693 [Mus musculus]                                              | 1183.5244 | 46.62  | 1.326033475 |
| 6671549  | PGLLLDGEAPNFEANTTIGR          | peroxiredoxin 6 [Mus musculus]                                                                       | 2142.0828 | 106.46 | 2.240140005 |
| 16716467 | PLELELCPGR                    | N-acetylneuraminic acid synthase (sialic acid synthase) [Mus musculus]                               | 1126.5922 | 24.5   | 0           |
| 10092608 | PPYTIYFVPR                    | glutathione S-transferase, pi 1 [Mus musculus]                                                       | 1351.7399 | 21.35  | 2.356412702 |
| 30409956 | QAADMILLDDNFASIVTGVVEEGR      | ATPase, Na+/K+ transporting, alpha 2 polypeptide [Mus musculus]                                      | 2464.2039 | 94.99  | 0           |
| 21450277 | QAADMILLDDNFASIVTGVVEEGR      | Na+/K+ -ATPase alpha 1 subunit [Mus musculus]                                                        | 2464.2039 | 94.99  | 0           |
| 6680842  | QAALQVADGFISR                 | gelsolin-like capping protein [Mus musculus]                                                         | 1375.7311 | 28.54  | 1.444062579 |
| 7305295  | QADLEKEELAEELASSLSGR          | myosin, heavy polypeptide 11, smooth muscle [Mus musculus]                                           | 2175.0828 | 126.31 | 0.876269352 |
| 6753294  | QALQDLLSEYMGNAGR              | catenin alpha 1 [Mus musculus]                                                                       | 1765.875  | 32.13  | 1.650706486 |
| 6754482  | QAQEYEAALLNIK                 | keratin complex 1, acidic, gene 18 [Mus musculus]                                                    | 1419.7465 | 42.53  | 0           |
| 20137006 | QAQQRDELADEIANSSSGK           | myosin, heavy polypeptide 9, non-muscle [Mus musculus]                                               | 2088.9861 | 43.77  | 1.132938965 |
| 51492007 | QAQVATGGGPGAPPGSQPDYSAAWAEYYR | KH-type splicing regulatory protein [Mus musculus]                                                   | 2952.3477 | 38.1   | 1.671271991 |
| 6754256  | QAVTNPNTFYATK                 | heat shock protein 9A [Mus musculus]                                                                 | 1568.7551 | 34.04  | 0           |
| 6996913  | QDIAFAYQR                     | annexin A2 [Mus musculus]                                                                            | 1111.561  | 49.19  | 1.498029444 |
| 31791057 | QDIAVISDSYFPR                 | laminin, gamma 1 [Mus musculus]                                                                      | 1510.755  | 23.13  | 0.691701309 |
| 6754854  | QDLGSPGIALDHLGR               | nidogen 1 [Mus musculus]                                                                             | 1677.8547 | 26.69  | 0           |
| 6680720  | QDLPNAMAISEMTRK               | ADP-ribosylation factor 4 [Mus musculus]                                                             | 1663.7721 | 54.81  | 0           |
| 55742711 | QEELESVEAGVQGGAFEGTR          | EH-domain containing 2 [Mus musculus]                                                                | 2092.9836 | 58.78  | 0           |
| 21450129 | QEQDYALSSYTR                  | acetyl-Coenzyme A acetyltransferase 1 precursor [Mus musculus]                                       | 1561.7236 | 69.44  | 1.450345148 |
| 7304993  | QEWESAGQQAPHPR                | drebrin-like [Mus musculus]                                                                          | 1620.7554 | 35.76  | 1.371522908 |
| 6671507  | QEYDEAGSPIVHR                 | actin, alpha 2, smooth muscle, aorta [Mus musculus]                                                  | 1501.699  | 43.59  | 0           |
| 63476037 | QFGVAPLTIAR                   | PREDICTED: procollagen, type VI, alpha 3 [Mus musculus]                                              | 1172.6819 | 50.3   | 1.841056722 |
| 21450625 | QFYINVER                      | eukaryotic translation initiation factor 4A1 [Mus musculus]                                          | 1068.5504 | 38.15  | 1.547441376 |
| 22164798 | QFYPLDIR                      | selenium binding protein 1 [Mus musculus]                                                            | 1051.5627 | 47.88  | 3.973170211 |
| 30409956 | QGAIVAVTGDGVNDSPALK           | ATPase, Na+/K+ transporting, alpha 2 polypeptide [Mus musculus]                                      | 1811.9325 | 51.64  | 0           |
| 21450277 | QGAIVAVTGDGVNDSPALK           | Na+/K+ -ATPase alpha 1 subunit [Mus musculus]                                                        | 1811.9325 | 51.64  | 0           |
| 31982233 | QGEDNSHTQDTEDEKDR             | LYRIC [Mus musculus]                                                                                 | 2217.9563 | 22.27  | 1.839434538 |
| 7106451  | QGIETPEDQNDLRK                | zinc finger protein 162 [Mus musculus]                                                               | 1642.8048 | 33.94  | 1.525279914 |
| 15147224 | QGIVPAGLTENELWR               | sideroflexin 1 [Mus musculus]                                                                        | 1682.8827 | 19.37  | 2.175906449 |
| 6680748  | QQQYSPMAIEEQVAVIYAGVR         | ATP synthase, H+ transporting, mitochondrial F1 complex, alpha subunit, isoform 1 [Mus musculus]     | 2309.1628 | 52.42  | 1.740761941 |
| 9845299  | QGTFFHSQQALEYGTK              | succinate-CoA ligase, GDP-forming, alpha subunit [Mus musculus]                                      | 1694.8204 | 87.02  | 1.482734367 |
| 6753294  | QIIVDPLSFSEER                 | catenin alpha 1 [Mus musculus]                                                                       | 1532.793  | 37.27  | 1.254936481 |
| 33563270 | QILLPFR                       | oxoglutarate dehydrogenase (lipoamide) [Mus musculus]                                                | 886.5481  | 24.84  | 1.732029774 |
| 18250296 | QINWTVLYR                     | ribosomal protein L24 [Mus musculus]                                                                 | 1192.649  | 36.14  | 1.186549685 |
| 31982526 | QIQEITGNTEALSGR               | parvin, alpha [Mus musculus]                                                                         | 1745.8757 | 68.79  | 1.294808167 |
| 1346343  | QISNLQQSISDAEQR               | Keratin, type II cytoskeletal 1 (Cytokeratin 1) (K1) (CK 1) (67 kDa cyto keratin) (Hair alpha protei | 1716.8538 | 110.95 | 0.048356331 |
| 6754976  | QITINDLPVGR                   | peroxiredoxin 1 [Mus musculus]                                                                       | 1225.6992 | 47.65  | 1.380241606 |
| 31560539 | QITVNDLPVGR                   | peroxiredoxin 2 [Mus musculus]                                                                       | 1211.676  | 29.42  | 1.49958686  |
| 21704156 | QKEFDPTITDGLSLGSPSR           | caldesmon 1 [Mus musculus]                                                                           | 1934.9489 | 52.84  | 0.897539167 |
| 6755354  | QLDSGLLLVTGPLVINR             | ribosomal protein L6 [Mus musculus]                                                                  | 1808.071  | 63.69  | 1.314474759 |
| 6755901  | QLFHPEQLITGK                  | tubulin, alpha 1 [Mus musculus]                                                                      | 1410.7765 | 77.08  | 1.098366137 |
| 34740335 | QLFHPEQLITGK                  | tubulin, alpha 2 [Mus musculus]                                                                      | 1410.7765 | 77.08  | 1.098366137 |
| 6678467  | QLFHPEQLITGK                  | tubulin, alpha 4 [Mus musculus]                                                                      | 1410.7765 | 77.08  | 1.098366137 |
| 6678469  | QLFHPEQLITGK                  | tubulin, alpha 6 [Mus musculus]                                                                      | 1410.7765 | 77.08  | 1.098366137 |
| 7305295  | QLHEYETELEDER                 | myosin, heavy polypeptide 11, smooth muscle [Mus musculus]                                           | 1690.7708 | 77.87  | 0.685742899 |
| 7305295  | QLHEYETELEDERK                | myosin, heavy polypeptide 11, smooth muscle [Mus musculus]                                           | 1818.858  | 86.47  | 0.61763947  |

Deamidation (NQ)

|          |                           |                    |                                                                                                     |           |        |             |
|----------|---------------------------|--------------------|-----------------------------------------------------------------------------------------------------|-----------|--------|-------------|
| 16716607 | QLHGESPTR                 | Deamidation (NQ)   | regulating synaptic membrane exocytosis 2 [Mus musculus]                                            | 1025.5088 | 22.3   | 0           |
| 7305295  | QLLQANPILEAFGNAK          |                    | myosin, heavy polypeptide 11, smooth muscle [Mus musculus]                                          | 1726.9501 | 97.26  | 0.736197251 |
| 20137006 | QLLQANPILEAFGNAK          |                    | myosin, heavy polypeptide 9, non-muscle [Mus musculus]                                              | 1726.9501 | 97.26  | 0.736197251 |
| 29336026 | QLLQANPILEAFGNAK          |                    | nonmuscle myosin heavy chain [Mus musculus]                                                         | 1726.9501 | 97.26  | 0.736197251 |
| 6678571  | QLLTLSNELSQAR             |                    | villin 2 [Mus musculus]                                                                             | 1472.8113 | 55.35  | 1.386704945 |
| 22122569 | QLSQNFLLDLR               | 3 Deamidation (NQ) | transcription factor B1, mitochondrial [Mus musculus]                                               | 1349.7111 | 24.38  | 0           |
| 56605979 | QLTEMLPSILNQLGADSLTSLR    |                    | basic transcription factor 3 [Mus musculus]                                                         | 2400.2791 | 21.7   | 1.541029393 |
| 13385718 | QLVEQVEQIQK               |                    | transmembrane emp24 protein transport domain containing 9 [Mus musculus]                            | 1341.7332 | 40.71  | 0           |
| 6753262  | QMEKDETVSDCSPHIANIGR      |                    | capping protein (actin filament) muscle Z-line, beta [Mus musculus]                                 | 2230.0083 | 26.95  | 0           |
| 30519911 | QMEQISQFLQAAER            |                    | transgelin 2 [Mus musculus]                                                                         | 1678.8342 | 23.76  | 2.827518783 |
| 6678483  | QMNPYIQVTSHQNR            |                    | ubiquitin-activating enzyme E1, Chr X [Mus musculus]                                                | 1715.8356 | 20.45  | 2.812877168 |
| 63746482 | QMQLENVSVALEFLDR          |                    | PREDICTED: filamin, alpha [Mus musculus]                                                            | 1891.9592 | 38.02  | 0.80603564  |
| 51712333 | QNGVLNSWTDQDSK            |                    | PREDICTED: similar to anti-PRSV coat protein monoclonal antibody PRSV-L 3-8 immunoglobulin light ch | 1591.7419 | 63.73  | 0           |
| 29789245 | QNQLLLER                  | Deamidation (NQ)   | centrosomal colon cancer autoantigen [Mus musculus]                                                 | 1014.5422 | 20.13  | 0           |
| 63487095 | QPELPEVIAMLGFR            |                    | PREDICTED: catenin src [Mus musculus]                                                               | 1599.8586 | 45.81  | 1.310983433 |
| 30794450 | QPYAVSELAGHQTSAESWGTGR    |                    | ribosomal protein L4 [Mus musculus]                                                                 | 2332.1038 | 76.79  | 1.323678744 |
| 13507628 | QQEQTAQGTAPDAVDQQR        |                    | LPS-responsive beige-like anchor [Mus musculus]                                                     | 1970.9241 | 138.11 | 1.883439657 |
| 14861854 | QQLETLQLDGGR              |                    | keratin complex 2, basic, gene 7 [Mus musculus]                                                     | 1357.7159 | 38.44  | 1.855766574 |
| 6755763  | QQLSAEELDAQLDAYNAR        |                    | THO complex 4 [Mus musculus]                                                                        | 2034.988  | 53.08  | 1.416105217 |
| 22550094 | QQPPDLVDFAVEYFTR          |                    | protein kinase, cAMP dependent regulatory, type II alpha [Mus musculus]                             | 1924.9542 | 25.37  | 1.779655206 |
| 21312968 | QQSEEDLLQDFSR             |                    | signal sequence receptor, gamma [Mus musculus]                                                      | 1707.8256 | 74.26  | 1.141212364 |
| 63476037 | QQSLETAMSFVAR             |                    | PREDICTED: procollagen, type VI, alpha 3 [Mus musculus]                                             | 1467.7247 | 38.63  | 0           |
| 51767143 | QRPGQGLEWIGEIDPDSYTYNQK   |                    | PREDICTED: similar to immunoglobulin heavy chain [Mus musculus]                                     | 2895.3574 | 31.5   | 0.342605696 |
| 41322904 | QSAAEQAAQAQAQAAAEK        |                    | plectin 1 isoform 1 [Mus musculus]                                                                  | 1957.9202 | 102.02 | 2.221631922 |
| 33859580 | QSAFPFGSGKPKF             |                    | galectin-3 [Mus musculus]                                                                           | 1469.7426 | 64.52  | 4.153805947 |
| 6754508  | QSFTMVAADTPENLR           |                    | LIM and SH3 protein 1 [Mus musculus]                                                                | 1608.7823 | 22.32  | 1.620683406 |
| 547749   | QSLEASLAETEGR             |                    | Keratin, type I cytoskeletal 10 (Cytokeratin 10) (K10) (CK 10)                                      | 1390.6851 | 55.92  | 0           |
| 13385084 | QSNQTFYEFYR               | Deamidation (NQ)   | nipsnap homolog 3A [Mus musculus]                                                                   | 1249.5688 | 19.05  | 0           |
| 30794412 | QSSYGGQSYNNQQQNTSESSGGQGR |                    | TAF15 RNA polymerase II, TATA box binding protein (TBP)-associated factor [Mus musculus]            | 2747.1592 | 121.18 | 1.273138849 |
| 30023842 | QTNPSAMEVEEDDPVPEIR       |                    | valosin containing protein [Mus musculus]                                                           | 2155.9856 | 91.04  | 1.401645423 |
| 7305291  | QTPAAPETEEPEYR            |                    | metaxin 1 [Mus musculus]                                                                            | 1617.7426 | 29.26  | 2.269229188 |
| 7305163  | QTQIFTTYSDNQPGVLIQVYEGER  |                    | heat shock protein 1-like [Mus musculus]                                                            | 2786.3315 | 22.67  | 0           |
| 31981690 | QTQTFTTYSDNQPGVLIQVYEGER  |                    | heat shock protein 8 [Mus musculus]                                                                 | 2774.3223 | 97.3   | 1.468009483 |
| 63704924 | QTQTFTTYSDNQPGVLIQVYEGER  |                    | PREDICTED: heat shock protein 1B [Mus musculus]                                                     | 2774.3223 | 97.3   | 1.468009483 |
| 6680606  | QTSAMSSFGGTGGGSVR         |                    | keratin complex 1, acidic, gene 19 [Mus musculus]                                                   | 1586.7441 | 109.71 | 1.495030518 |
| 8567336  | QTTTPMTAQPPAPTFSLQIQQR    |                    | chloride channel calcium activated 3 [Mus musculus]                                                 | 2383.2681 | 74.64  | 0.227897252 |
| 8567336  | QTTTPMTAQPPAPTFSLQIQQR    | Oxidation (M)      | chloride channel calcium activated 3 [Mus musculus]                                                 | 2399.2542 | 56.67  | 0.236857053 |
| 22267442 | QVAEQFLNMR                |                    | ubiquinol cytochrome c reductase core protein 2 [Mus musculus]                                      | 1235.6237 | 30.76  | 1.678036832 |
| 6753864  | QVIGTGSFFPK               |                    | four and a half LIM domains 1 [Mus musculus]                                                        | 1180.6409 | 39.2   | 0           |
| 22122789 | QVLLSEPQEAALYR            |                    | acylpeptide hydrolase [Mus musculus]                                                                | 1687.9059 | 21.46  | 1.591351824 |
| 63562723 | QVVNIPSFIVR               |                    | PREDICTED: similar to 40S ribosomal protein S9 [Mus musculus]                                       | 1271.7485 | 32.25  | 1.133587287 |
| 6678573  | QVVVEGQEPANFWMALGGK       |                    | villin 1 [Mus musculus]                                                                             | 2060.0032 | 24.84  | 0           |
| 50355690 | QWGWQTQGR                 |                    | ribosomal protein L17 [Mus musculus]                                                                | 1018.4848 | 27.9   | 1.147847012 |
| 6677813  | QWYESHYALPLGR             |                    | ribosomal protein S8 [Mus musculus]                                                                 | 1619.7941 | 63.05  | 1.164576628 |
| 21592285 | QWYETNAPSTIR              |                    | keratin 20 [Mus musculus]                                                                           | 1465.7125 | 30.35  | 1.840231061 |
| 6996913  | RAEDGSVIDYELIQDAR         |                    | annexin A2 [Mus musculus]                                                                           | 2064.9863 | 51.9   | 1.098069066 |
| 31981690 | RFDDAVVQSDMK              |                    | heat shock protein 8 [Mus musculus]                                                                 | 1410.6724 | 43.63  | 1.729605492 |
| 63664182 | RFDDAVVQSDMK              |                    | PREDICTED: similar to heat shock protein 8 [Mus musculus]                                           | 1410.6724 | 43.63  | 1.729605492 |
| 6753240  | RFDVSGYPTLK               |                    | calcium binding protein, intestinal [Mus musculus]                                                  | 1282.6819 | 21.33  | 0           |
| 13384620 | RPAEDMEEEQAFKR            |                    | heterogeneous nuclear ribonucleoprotein K [Mus musculus]                                            | 1735.8123 | 47.27  | 1.646878581 |
| 51491845 | RPISADSAIMNPASK           |                    | clathrin, heavy polypeptide (Hc) [Mus musculus]                                                     | 1557.8131 | 23.37  | 1.140206806 |
| 27532959 | RPQPEEGATYEGIQK           |                    | aldehyde dehydrogenase 1 family, member L1 [Mus musculus]                                           | 1702.8544 | 46.33  | 0.981382913 |
| 31542159 | SAAEMVLSDDNFASIVAAVEEGR   |                    | ATPase, Ca++ transporting, ubiquitous [Mus musculus]                                                | 2381.1213 | 23.16  | 1.102672385 |
| 63489754 | SADESGQALLAASHYASDEV      |                    | PREDICTED: similar to Spectrin alpha chain, brain (Spectrin, non-erythroid alpha chain) (Alpha-II s | 2177.012  | 20.52  | 1.255235277 |
| 6754524  | SADTLWGIQK                |                    | lactate dehydrogenase 1, A chain [Mus musculus]                                                     | 1118.5743 | 42.39  | 0           |
| 63746482 | SAGQGEVLYYVEDPAGHQEEAK    |                    | PREDICTED: filamin, alpha [Mus musculus]                                                            | 2313.1016 | 60.62  | 0           |
| 34328108 | SAGVSVPGPMGSPGPR          |                    | procollagen, type I, alpha 1 [Mus musculus]                                                         | 1452.7366 | 25.08  | 0           |
| 8394027  | SALASVIMGLSPILGK          |                    | alpha isoform of regulatory subunit A, protein phosphatase 2 [Mus musculus]                         | 1556.8914 | 29.05  | 0           |
| 63476037 | SALLDSIQNLQVALTSK         |                    | PREDICTED: procollagen, type VI, alpha 3 [Mus musculus]                                             | 1800.9987 | 56.61  | 0           |
| 30348966 | SALPAQSAATLPAR            |                    | spectrin beta 2 isoform 1 [Mus musculus]                                                            | 1353.7493 | 20.65  | 1.905958309 |

|          |                             |                                                                                                     |           |        |             |
|----------|-----------------------------|-----------------------------------------------------------------------------------------------------|-----------|--------|-------------|
| 6754206  | SANLVAATLGAILNR             | hexokinase 1 [Mus musculus]                                                                         | 1483.8679 | 69.09  | 1.426299499 |
| 31982290 | SAQPSPHYMAGPSSGQIYGPGR      | LIM domain containing preferred translocation partner in lipoma [Mus musculus]                      | 2342.1033 | 53.24  | 0.959987732 |
| 63518159 | SAVDNCQDSWR                 | PREDICTED: phosphogluconate dehydrogenase [Mus musculus]                                            | 1280.5426 | 30.6   | 2.405774775 |
| 29293809 | SAYDSTMETMNYAQIR            | ATP citrate lyase [Mus musculus]                                                                    | 1880.8182 | 38.77  | 2.105483463 |
| 14861854 | SAYGGPVGAGIR                | keratin complex 2, basic, gene 7 [Mus musculus]                                                     | 1104.5834 | 32.75  | 1.506816396 |
| 54020676 | SDAAPTVPVQPSAPR             | hypothetical protein LOC229317 [Mus musculus]                                                       | 1393.7161 | 43.06  | 1.383290612 |
| 33667042 | SDALETGLFLNHYQMK            | heterogeneous nuclear ribonucleoprotein L [Mus musculus]                                            | 1866.9033 | 27.03  | 1.298566009 |
| 18079339 | SDFDPGQDQYQHPPK             | aconitase 2, mitochondrial [Mus musculus]                                                           | 1731.7659 | 64.63  | 1.299710448 |
| 31981722 | SDIDEIVLVGGSTR              | heat shock 70kD protein 5 (glucose-regulated protein) [Mus musculus]                                | 1460.7633 | 29.38  | 0           |
| 58037546 | SDYLNTFFEMDK                | isocitrate dehydrogenase 1 (NADP+), soluble [Mus musculus]                                          | 1509.6801 | 38.55  | 2.093822839 |
| 9845257  | SEAAPAAPAAAPPAEK            | histone 1, H1c [Mus musculus]                                                                       | 1448.7396 | 62.89  | 0           |
| 63738313 | SEDGVEGDLGETQSR             | PREDICTED: similar to AHNAK [Mus musculus]                                                          | 1578.7072 | 23.3   | 1.002750259 |
| 31982290 | SEGDTAYGQQVQPNTWK           | LIM domain containing preferred translocation partner in lipoma [Mus musculus]                      | 1908.8793 | 75.13  | 1.090698678 |
| 6755817  | SELVANNVTLPAGEQR            | thymopoietin [Mus musculus]                                                                         | 1697.8868 | 65.53  | 0           |
| 6679687  | SEPIPESENEGPKV              | glucose regulated protein [Mus musculus]                                                            | 1382.6852 | 79.29  | 1.244134878 |
| 6755566  | SEQAEPPAAADTHEAGDQNEAEK     | solute carrier family 9 (sodium/hydrogen exchanger), isoform 3 regulator 1 [Mus musculus]           | 2395.0437 | 80.6   | 1.798976227 |
| 13430890 | SETAAPAAPAPAEK              | histone 1, H1e [Mus musculus]                                                                       | 1478.7521 | 59.52  | 0.749640786 |
| 34328365 | SETAAPAAPAPAVEK             | histone 1, H1d [Mus musculus]                                                                       | 1506.7806 | 65.12  | 1.10949604  |
| 21426893 | SETAPAETAAPAPVEK            | histone 1, H1b [Mus musculus]                                                                       | 1568.7805 | 52.87  | 0.65666791  |
| 6671690  | SETITEEELVGLMKN             | carbonyl reductase 1 [Mus musculus]                                                                 | 1692.8368 | 39.44  | 1.173310504 |
| 21314832 | SFENSLGINVPR                | UDP-glucose pyrophosphorylase 2 [Mus musculus]                                                      | 1332.6908 | 69.52  | 1.496440201 |
| 6679567  | SFTPDHVYYAR                 | polymerase I and transcript release factor [Mus musculus]                                           | 1291.647  | 37.47  | 1.033035644 |
| 31981690 | SFYPEEVSSMVLTK              | heat shock protein 8 [Mus musculus]                                                                 | 1616.7925 | 62.15  | 2.630959386 |
| 51873060 | SGDAIIVDMVPGKPMCVESFSDYPLGR | eukaryotic translation elongation factor 1 alpha 1 [Mus musculus]                                   | 2938.3855 | 77.53  | 1.120197824 |
| 51770896 | SGETEDTFIADLVVGLCTGQIK      | PREDICTED: similar to Alpha enolase (2-phospho-D-glycerate hydro-lyase) (Non-neural enolase) (NNE)  | 2296.1365 | 68.68  | 1.289584121 |
| 40254244 | SGSMDSPMSTENNSQLR           | loss of heterozygosity, 11, chromosomal region 2, gene A homolog [Mus musculus]                     | 1840.8048 | 21.34  | 0.911411893 |
| 13937355 | SGYQQAASEHGLVVIAPDTSR       | esterase D/formylglutathione hydrolase [Mus musculus]                                               | 2283.1382 | 54.47  | 1.178211454 |
| 8567338  | SIATLAITLLK                 | coatomer protein complex, subunit gamma [Mus musculus]                                              | 1244.7821 | 25.73  | 0.780101102 |
| 41322904 | SIITYVSSLYDAMP              | plectin 1 isoform 1 [Mus musculus]                                                                  | 1715.8741 | 24.81  | 0           |
| 6755863  | SILFVPTSAPR                 | tumor rejection antigen gp96 [Mus musculus]                                                         | 1187.6807 | 45.01  | 0           |
| 31981690 | SINPDEAVAYGAAVQAAILSGDK     | heat shock protein 8 [Mus musculus]                                                                 | 2260.1294 | 66.19  | 1.661862566 |
| 13384736 | SIPLDEGEDEAQR               | dynein, cytoplasmic, heavy chain 1 [Mus musculus]                                                   | 1458.6791 | 63.44  | 0           |
| 31982030 | SIQEIQELDKDDESLR            | Rho GDP dissociation inhibitor (GDI) alpha [Mus musculus]                                           | 1917.9484 | 70.69  | 1.018584007 |
| 31982030 | SIQEIQELDKDDESLRK           | Rho GDP dissociation inhibitor (GDI) alpha [Mus musculus]                                           | 2046.04   | 35.74  | 0.840613046 |
| 34740335 | SIQFVDWCPTGFK               | tubulin, alpha 2 [Mus musculus]                                                                     | 1527.7346 | 56.13  | 2.233531907 |
| 6678467  | SIQFVDWCPTGFK               | tubulin, alpha 4 [Mus musculus]                                                                     | 1527.7346 | 56.13  | 2.233531907 |
| 38090003 | SISTSLPVLDLIDAIAPNAVR       | PREDICTED: expressed sequence AI427122 [Mus musculus]                                               | 2165.2214 | 73.75  | 1.611493611 |
| 31981657 | SIVNNGHSFNVEFDDSQDNAVLK     | carbonic anhydrase 2 [Mus musculus]                                                                 | 2549.1572 | 20.45  | 1.838266369 |
| 63556656 | SLAAYTAACQAAGAAVKPWR        | PREDICTED: RIKEN cDNA A430096B05 gene [Mus musculus]                                                | 2006.0352 | 55.59  | 0.445230105 |
| 13624315 | SLDMDGIIAEVR                | keratin complex 2, basic, gene 8 [Mus musculus]                                                     | 1318.6737 | 95.99  | 1.913791581 |
| 63565108 | SLDMDGIIAEVR                | PREDICTED: similar to cytokeratin EndoA - mouse [Mus musculus]                                      | 1318.6737 | 95.99  | 1.913791581 |
| 7305295  | SLEADLMQLQEDLAAAER          | myosin, heavy polypeptide 11, smooth muscle [Mus musculus]                                          | 2002.9836 | 107.19 | 0.81315369  |
| 31981302 | SLEDALSSDTSGHFR             | annexin A6 [Mus musculus]                                                                           | 1621.7513 | 39.14  | 0           |
| 6754556  | SLETENSALQLQVTER            | lamin B1 [Mus musculus]                                                                             | 1817.9216 | 36.52  | 0           |
| 22507391 | SLGYAYVNFQQPADAER           | poly(A) binding protein, cytoplasmic 4 isoform 2 [Mus musculus]                                     | 1928.9199 | 22.31  | 2.720950625 |
| 6680606  | SLLEGQEAHYNNLPTPK           | keratin complex 1, acidic, gene 19 [Mus musculus]                                                   | 1910.9753 | 49.06  | 1.613846934 |
| 1346343  | SLNNQFASFIDK                | Keratin, type II cytoskeletal 1 (Cytokeratin 1) (K1) (CK 1) (67 kDa cytokeratin) (Hair alpha protei | 1383.6907 | 82.19  | 0           |
| 6754524  | SLNPELGTADKEQWK             | lactate dehydrogenase 1, A chain [Mus musculus]                                                     | 1830.8939 | 68.61  | 3.468001987 |
| 33859811 | SLNSEMDNILANLR              | hydroxyacyl-Coenzyme A dehydrogenase/3-ketoacyl-Coenzyme A thiolase/enoyl-Coenzyme A hydratase (tri | 1589.8002 | 55.77  | 1.598796744 |
| 6680572  | SLSALGNVISALAEGSTYVYR       | kinesin family member 5B [Mus musculus]                                                             | 2268.1782 | 46.46  | 2.009247205 |
| 21592285 | SLSSSSQGPALSMSGSLYR         | keratin 20 [Mus musculus]                                                                           | 1914.9297 | 22.2   | 3.167693111 |
| 40556608 | SLTNDWEDHLAVK               | heat shock protein 1, beta [Mus musculus]                                                           | 1527.746  | 50.11  | 1.225377269 |
| 31982755 | SLYSSSPGGAYVTR              | vimentin [Mus musculus]                                                                             | 1444.7135 | 69.92  | 1.078345926 |
| 22267442 | SMAASGNLGHTEPFLDEL          | ubiquinol cytochrome c reductase core protein 2 [Mus musculus]                                      | 1759.8459 | 31.05  | 0           |
| 20137006 | SMEAEMIQLQEELAAAER          | myosin, heavy polypeptide 9, non-muscle [Mus musculus]                                              | 2048.9697 | 52.98  | 1.529371936 |
| 22122825 | SMLEVNYPMENGVIR             | actin-related protein 2 [Mus musculus]                                                              | 1751.8582 | 39.01  | 1.216921766 |
| 50355692 | SNEDQSMGNWQIR               | lamin A isoform A [Mus musculus]                                                                    | 1564.6886 | 67.2   | 1.119948169 |
| 33469063 | SNLVGMGVIPLEYLPGETADSLGLTGR | aconitase 1 [Mus musculus]                                                                          | 2759.4116 | 43.57  | 0           |
| 13624315 | SNMDNMFESYINNL              | keratin complex 2, basic, gene 8 [Mus musculus]                                                     | 1847.8213 | 101.92 | 1.774123744 |
| 63565108 | SNMDNMFESYINNL              | PREDICTED: similar to cytokeratin EndoA - mouse [Mus musculus]                                      | 1847.8213 | 101.92 | 1.774123744 |

|          |                           |                  |                                                                                                      |           |        |             |
|----------|---------------------------|------------------|------------------------------------------------------------------------------------------------------|-----------|--------|-------------|
| 21450277 | SPDFTNENPLETR             |                  | Na+/K+ -ATPase alpha 1 subunit [Mus musculus]                                                        | 1519.7122 | 59.36  | 1.436011644 |
| 6679761  | SPFETDMLTLTR              |                  | fructose biphosphatase 2 [Mus musculus]                                                              | 1410.699  | 38.36  | 1.294955366 |
| 63746482 | SPFSVGVSPSLDLSK           |                  | PREDICTED: filamin, alpha [Mus musculus]                                                             | 1519.7981 | 88.62  | 0           |
| 18087805 | SPYQEFTHLVK               |                  | ribosomal protein S2 [Mus musculus]                                                                  | 1463.7246 | 36.17  | 2.404451612 |
| 12746446 | SQDVGFWEVEVVR             |                  | epithelial protein lost in neoplasm [Mus musculus]                                                   | 1507.72   | 59.81  | 2.255714026 |
| 6678571  | SQEQLAAELAEYTA            |                  | villin 2 [Mus musculus]                                                                              | 1651.8229 | 36.13  | 1.028097066 |
| 6678571  | SQEQLAAELAEYTA            | Deamidation (NQ) | villin 2 [Mus musculus]                                                                              | 1652.8151 | 30.16  | 1.336510114 |
| 6755354  | SQFSLTNGMYPHK             |                  | ribosomal protein L6 [Mus musculus]                                                                  | 1509.7172 | 53.26  | 0           |
| 18079339 | SQFTITPGSEQIR             |                  | aconitase 2, mitochondrial [Mus musculus]                                                            | 1463.7573 | 48.64  | 1.762210934 |
| 31981722 | SQIFSTASDNQPTVTIK         |                  | heat shock 70kD protein 5 (glucose-regulated protein) [Mus musculus]                                 | 1836.938  | 83.77  | 0.983258375 |
| 31981690 | SQIHDIVLVGGSTR            |                  | heat shock protein 8 [Mus musculus]                                                                  | 1481.8137 | 53     | 1.298436175 |
| 6677871  | SQIVVEEGSEPELMK           |                  | scinderin [Mus musculus]                                                                             | 1874.9353 | 65.16  | 0           |
| 63487095 | SQSSHYSDDSTPLIDR          |                  | PREDICTED: catenin src [Mus musculus]                                                                | 1920.8944 | 23.44  | 1.28946559  |
| 547749   | SQYEQLAEQNR               |                  | Keratin, type I cytoskeletal 10 (Cytokeratin 10) (K10) (CK 10)                                       | 1365.6462 | 68.63  | 0           |
| 6680606  | SRLEQEIATYR               |                  | keratin complex 1, acidic, gene 19 [Mus musculus]                                                    | 1365.7112 | 29.92  | 1.254818591 |
| 6671666  | SSEMNVLIPTEGGDFNEFPVPEQFK |                  | CAP, adenylate cyclase-associated protein 1 [Mus musculus]                                           | 2811.3267 | 42.83  | 0           |
| 6755040  | SSFFVNGLTLGGQK            |                  | profilin 1 [Mus musculus]                                                                            | 1454.7559 | 79.94  | 1.12202064  |
| 31559916 | SSGSPYGGYGGSGGGSGGYGSR    |                  | heterogeneous nuclear ribonucleoprotein A3 isoform b [Mus musculus]                                  | 1910.8058 | 174.21 | 1.387852751 |
| 136429   | SSGSSYPSLLQCLK            |                  | Trypsin precursor                                                                                    | 1469.7335 | 49.27  | 0           |
| 12083691 | SSGTGASVGGPPQPSDQDTLVQR   |                  | PDZ and LIM domain 5 isoform ENH1 [Mus musculus]                                                     | 2184.0515 | 36.99  | 0           |
| 28416440 | SSHELGNQDQIGPQLR          |                  | GTPase, IMAP family member 4 isoform a [Mus musculus]                                                | 1778.8799 | 24.3   | 0           |
| 6755354  | SSITPGTVLILTGR            |                  | ribosomal protein L6 [Mus musculus]                                                                  | 1527.9177 | 66.19  | 1.300319525 |
| 22779912 | SSLLDDLLTESEDMAQR         |                  | dynamin 1-like [Mus musculus]                                                                        | 1922.9215 | 59.46  | 1.184788936 |
| 46195798 | SSLNPILFR                 |                  | dolichyl-di-phosphooligosaccharide-protein glycotransferase [Mus musculus]                           | 1046.6021 | 31.7   | 1.622468616 |
| 8567338  | SSPEPVALTESETEYVIR        |                  | coatamer protein complex, subunit gamma [Mus musculus]                                               | 2006.9954 | 22.87  | 1.7657849   |
| 31981690 | STAGDTHLGGEDFDNR          |                  | heat shock protein 8 [Mus musculus]                                                                  | 1691.7456 | 130.07 | 1.260073445 |
| 33859482 | STAILFYELSENDLNFIK        |                  | eukaryotic translation elongation factor 2 [Mus musculus]                                            | 2204.1155 | 43.59  | 0.681027328 |
| 6754256  | STNGDTFLGGEDFDQALLR       |                  | heat shock protein 9A [Mus musculus]                                                                 | 2055.9663 | 86.02  | 1.563678278 |
| 30425112 | STPEDQILYQTER             |                  | hypothetical protein LOC109154 [Mus musculus]                                                        | 1579.7693 | 25.92  | 0           |
| 8567336  | STWEVIQESDFK              |                  | chloride channel calcium activated 3 [Mus musculus]                                                  | 1597.7372 | 65.79  | 0.324114496 |
| 6678573  | SVEDLPEGVDPSPR            |                  | villin 1 [Mus musculus]                                                                              | 1399.6514 | 31.6   | 1.764950594 |
| 19705424 | SVFPEQANNNEWAR            |                  | proteasome 26S non-ATPase subunit 3 [Mus musculus]                                                   | 1661.7679 | 27.24  | 1.179862812 |
| 27370510 | SVNDIVVLGPEQFYATR         |                  | paraoxonase 3 [Mus musculus]                                                                         | 1907.9736 | 22.16  | 2.619070016 |
| 51491845 | SVNESLNNLFITEEDYQALR      |                  | clathrin, heavy polypeptide (Hc) [Mus musculus]                                                      | 2355.1462 | 68.12  | 1.138424284 |
| 6678359  | SVPMSTVFYPSDGVATEK        |                  | transketolase [Mus musculus]                                                                         | 1914.9019 | 35.25  | 1.395426532 |
| 6753658  | SVSTPSEAGSQDSGDGAVGSR     |                  | dynein, cytoplasmic, intermediate chain 2 [Mus musculus]                                             | 1950.8684 | 98.03  | 1.189898133 |
| 6756041  | SVTEQGAELSNEER            |                  | tyrosine 3-monooxygenase/tryptophan 5-monooxygenase activation protein, zeta polypeptide [Mus muscu] | 1548.7263 | 87.67  | 1.034713797 |
| 13385310 | SVTNEDVTQEQLGGAK          |                  | propionyl Coenzyme A carboxylase, beta polypeptide [Mus musculus]                                    | 1675.8064 | 47.68  | 0           |
| 6753138  | SYEAYVLNIIR               |                  | Na+/K+ -ATPase beta 1 subunit [Mus musculus]                                                         | 1340.7264 | 36.56  | 1.64107705  |
| 6671507  | SYELPDGQVITIGNER          |                  | actin, alpha 2, smooth muscle, aorta [Mus musculus]                                                  | 1790.9016 | 110.62 | 0.77243777  |
| 6671509  | SYELPDGQVITIGNER          |                  | actin, beta, cytoplasmic [Mus musculus]                                                              | 1790.9016 | 110.62 | 0.77243777  |
| 30425250 | SYELPDGQVITIGNER          |                  | hypothetical protein LOC238880 [Mus musculus]                                                        | 1790.9016 | 110.62 | 0.77243777  |
| 63652452 | SYKLPDQVITIGNER           | Deamidation (NQ) | PREDICTED: similar to cytoplasmic beta-actin [Mus musculus]                                          | 1790.9385 | 33.87  | 0           |
| 6996913  | SYSPYDMLESIK              |                  | annexin A2 [Mus musculus]                                                                            | 1432.6819 | 62.46  | 1.073570458 |
| 31543974 | TAFDEAIAELDTLNEESYK       |                  | tyrosine 3-monooxygenase/tryptophan 5-monooxygenase activation protein, zeta polypeptide [Mus muscu] | 2159.0205 | 19.88  | 0           |
| 6756041  | TAFDEAIAELDTLSEESYK       |                  | tyrosine 3-monooxygenase/tryptophan 5-monooxygenase activation protein, zeta polypeptide [Mus muscu] | 2131.9983 | 93.13  | 1.335479482 |
| 6806903  | TASEMVLADDNFSTIVAAVEEGR   |                  | ATPase, Ca++ transporting, cardiac muscle, slow twitch 2 [Mus musculus]                              | 2425.1687 | 43.6   | 1.717795738 |
| 63489754 | TATDEAYKDPSNLQGK          |                  | PREDICTED: similar to Spectrin alpha chain, brain (Spectrin, non-erythroid alpha chain) (Alpha-II s  | 1737.8396 | 45.22  | 0.802207801 |
| 6671664  | TDAPQPDKVEEGKEEEK         |                  | calnexin [Mus musculus]                                                                              | 2043.9392 | 78.1   | 1.374627668 |
| 22550094 | TDEHVIDQGDDGDNFYVIER      |                  | protein kinase, cAMP dependent regulatory, type II alpha [Mus musculus]                              | 2337.0422 | 42.73  | 0           |
| 6677805  | TDITYPAGFMDVISIDK         |                  | ribosomal protein S4, X-linked [Mus musculus]                                                        | 1885.9183 | 52.54  | 1.581968051 |
| 6678331  | TDLGPTYNGWQVLDATPQER      |                  | transglutaminase 3, E polypeptide [Mus musculus]                                                     | 2261.0867 | 20.31  | 2.912198511 |
| 10946574 | TDLNPDNLQGGDDLDPNVYLSSR   |                  | creatine kinase, brain [Mus musculus]                                                                | 2518.1729 | 74.8   | 0           |
| 63476037 | TDLQTITNDRP               |                  | PREDICTED: procollagen, type VI, alpha 3 [Mus musculus]                                              | 1273.6409 | 34.57  | 0           |
| 6755714  | TDMFQTVLDYEGK             |                  | transgelin [Mus musculus]                                                                            | 1546.7236 | 64.77  | 16.3392396  |
| 63540743 | TDYVTDNGDGTYR             |                  | PREDICTED: filamin C, gamma [Mus musculus]                                                           | 1577.6791 | 20.42  | 0           |
| 31982030 | TDYMGVSGYGR               |                  | Rho GDP dissociation inhibitor (GDI) alpha [Mus musculus]                                            | 1245.5721 | 61.61  | 0.901637037 |
| 13384620 | TDYNASVSPDSSGPER          |                  | heterogeneous nuclear ribonucleoprotein K [Mus musculus]                                             | 1780.812  | 86.47  | 1.436581146 |
| 63540743 | TEAAIVEGEDSAYSVR          |                  | PREDICTED: filamin C, gamma [Mus musculus]                                                           | 1825.8622 | 33.41  | 0           |
| 6755534  | TEEPESPESVDQTSPTPGDGNPR   |                  | solute carrier family 12, member 7 [Mus musculus]                                                    | 2426.0547 | 59.26  | 0           |



|          |                         |                                                                                                  |           |        |             |
|----------|-------------------------|--------------------------------------------------------------------------------------------------|-----------|--------|-------------|
| 63481281 | TELAEPPIAIRTSETVMYPAYAK | PREDICTED: glutamyl-prolyl-tRNA synthetase [Mus musculus]                                        | 2551.3069 | 26.61  | 1.442151059 |
| 7305295  | TELEDTLDDSTATQQQLR      | myosin, heavy polypeptide 11, smooth muscle [Mus musculus]                                       | 1949.9332 | 106.08 | 1.10724875  |
| 13624315 | TEMENEFVLIK             | keratin complex 2, basic, gene 8 [Mus musculus]                                                  | 1352.656  | 45.68  | 1.156045647 |
| 63565108 | TEMENEFVLIK             | PREDICTED: similar to cytokeratin EndoA - mouse [Mus musculus]                                   | 1352.656  | 45.68  | 1.156045647 |
| 6755863  | TETVEEPLLEDEAAKEEK      | tumor rejection antigen gp96 [Mus musculus]                                                      | 2075.9668 | 50.88  | 0           |
| 33859482 | TFCQLILDPIFK            | eukaryotic translation elongation factor 2 [Mus musculus]                                        | 1437.7815 | 44.75  | 1.287893472 |
| 33563250 | TFGGAPGFLSGPLSSPVFPR    | desmin [Mus musculus]                                                                            | 2078.0759 | 110.54 | 0.715092558 |
| 6679078  | TFIAIKPDGVQR            | nucleoside-diphosphate kinase 2 [Mus musculus]                                                   | 1344.7699 | 27.23  | 0           |
| 21312260 | TFPTVNPTTGEVIGHVAEGDR   | aldehyde dehydrogenase 1 family, member B1 [Mus musculus]                                        | 2197.0908 | 67.5   | 1.645855489 |
| 63746482 | TFSVWYVPEVTGTHK         | PREDICTED: filamin, alpha [Mus musculus]                                                         | 1750.8778 | 55.86  | 2.556884586 |
| 6753036  | TFVQENVYDEFVER          | aldehyde dehydrogenase 2, mitochondrial [Mus musculus]                                           | 1774.8352 | 56.09  | 1.718020211 |
| 6755040  | TFVSITPAEVLVVGK         | profilin 1 [Mus musculus]                                                                        | 1616.9252 | 101.02 | 1.205136455 |
| 6680748  | TGAIVDVPVGEELLGR        | ATP synthase, H+ transporting, mitochondrial F1 complex, alpha subunit, isoform 1 [Mus musculus] | 1624.8989 | 104.81 | 1.530807763 |
| 58037267 | TGEAIVDAALSALR          | protein disulfide isomerase-associated 6 [Mus musculus]                                          | 1386.7617 | 62.24  | 1.522391103 |
| 6755004  | TGGLEIDSDFGGFR          | programmed cell death 8 [Mus musculus]                                                           | 1470.6917 | 37.97  | 2.685667084 |
| 6681095  | TGQAAGFSYTDANK          | cytochrome c, somatic [Mus musculus]                                                             | 1430.6534 | 78.51  | 1.482998946 |
| 6680748  | TGTAEMSSILEER           | ATP synthase, H+ transporting, mitochondrial F1 complex, alpha subunit, isoform 1 [Mus musculus] | 1423.6819 | 58.76  | 1.395203139 |
| 31560517 | TGVAPIIDVVR             | ribosomal protein L27a [Mus musculus]                                                            | 1139.6801 | 55.82  | 1.269947361 |
| 63746482 | TGVAVNKPAEFTVDAK        | PREDICTED: filamin, alpha [Mus musculus]                                                         | 1646.8812 | 92.92  | 0.4948992   |
| 7305295  | TGVLAHLEEEER            | myosin, heavy polypeptide 11, smooth muscle [Mus musculus]                                       | 1253.6564 | 37.79  | 2.640397973 |
| 6754576  | TGVPSQTPNPYANQR         | lymphocyte antigen 64 [Mus musculus]                                                             | 1629.8036 | 24.57  | 1.341591794 |
| 21644581 | THYQQLLAYEDR            | UDP-GlcNAc:betaGal beta-1,3-N-acetylglucosaminyltransferase 7 [Mus musculus]                     | 1536.7482 | 33.32  | 0.798110037 |
| 29293809 | TIAlIAGEIPEALTR         | ATP citrate lyase [Mus musculus]                                                                 | 1567.9093 | 45.61  | 1.148095977 |
| 31980648 | TIAMDGTEGLVR            | ATP synthase, H+ transporting mitochondrial F1 complex, beta subunit [Mus musculus]              | 1262.6456 | 52.07  | 1.564618409 |
| 6754976  | TIAQDYGVLK              | peroxiredoxin 1 [Mus musculus]                                                                   | 1107.592  | 30.19  | 1.002649346 |
| 6755901  | TIGGGDDSFNTFFSETGAGK    | tubulin, alpha 1 [Mus musculus]                                                                  | 2007.8962 | 136.29 | 1.536863624 |
| 34740335 | TIGGGDDSFNTFFSETGAGK    | tubulin, alpha 2 [Mus musculus]                                                                  | 2007.8962 | 136.29 | 1.536863624 |
| 6678469  | TIGGGDDSFNTFFSETGAGK    | tubulin, alpha 6 [Mus musculus]                                                                  | 2007.8962 | 136.29 | 1.536863624 |
| 31981909 | TIGVSNFNPLQIER          | aldo-keto reductase family 1, member B3 (aldose reductase) [Mus musculus]                        | 1587.8385 | 33.23  | 1.742897626 |
| 31543605 | TILPAAAQDVYYR           | ribophorin I [Mus musculus]                                                                      | 1480.785  | 47.24  | 1.146089657 |
| 11230802 | TINEVENQILTR            | actinin alpha 4 [Mus musculus]                                                                   | 1429.7743 | 73.91  | 0.884526928 |
| 63638100 | TIQFVDWCPTGFK           | PREDICTED: similar to tubulin, alpha 1 [Mus musculus]                                            | 1541.7429 | 56.02  | 0           |
| 6755901  | TIQFVDWCPTGFK           | tubulin, alpha 1 [Mus musculus]                                                                  | 1541.7429 | 56.02  | 0           |
| 6678469  | TIQFVDWCPTGFK           | tubulin, alpha 6 [Mus musculus]                                                                  | 1541.7429 | 56.02  | 0           |
| 9845265  | TITLEVEPSDTIENVK        | ubiquitin A-52 residue ribosomal protein fusion product 1 [Mus musculus]                         | 1787.9286 | 77.56  | 0           |
| 31981828 | TLDLPIYVTR              | coatomer protein complex subunit alpha [Mus musculus]                                            | 1190.6816 | 30.27  | 1.593829118 |
| 7710042  | TLINAEDPPMIVVR          | IQ motif containing GTPase activating protein 1 [Mus musculus]                                   | 1567.8539 | 21.16  | 1.208023599 |
| 33563236 | TLLGDVPVADPTVPNVTVTR    | Rho, GDP dissociation inhibitor (GDI) beta [Mus musculus]                                        | 2163.2043 | 45.91  | 0           |
| 31981657 | TLNFNEEGDAEAMVDNWRPAQLK | carbonic anhydrase 2 [Mus musculus]                                                              | 2874.3237 | 39.88  | 2.438295419 |
| 8393988  | TMPGGNDHEIFTDPR         | phosphomannomutase 2 [Mus musculus]                                                              | 1686.7659 | 23.9   | 1.384797121 |
| 31542602 | TNLIVNYLPQNMTQEELR      | ELAV (embryonic lethal, abnormal vision, Drosophila)-like 1 (Hu antigen R) [Mus musculus]        | 2176.0964 | 26.97  | 1.276792311 |
| 29126205 | TNVSGGAIALGHPLGGSGSR    | acetyl-Coenzyme A acyltransferase 2 (mitochondrial 3-oxoacyl-Coenzyme A thiolase) [Mus musculus] | 1807.9524 | 83     | 1.604382306 |
| 6754570  | TPAQFDADELRL            | annexin A1 [Mus musculus]                                                                        | 1262.6078 | 41.75  | 0           |
| 29336026 | TPNVGGPGGQVWEVTAR       | nonmuscle myosin heavy chain [Mus musculus]                                                      | 1722.8625 | 31.86  | 2.033332176 |
| 30023814 | TPSPPEPEPAGTAQK         | breast carcinoma amplified sequence 1 [Mus musculus]                                             | 1506.7452 | 42.52  | 0           |
| 6677935  | TPVDYIDLPSYSSPSR        | sorbin and SH3 domain containing 1 [Mus musculus]                                                | 1796.8605 | 23     | 0           |
| 19527174 | TPVEEVPAAIAPFQGR        | splicing factor 3b, subunit 3 [Mus musculus]                                                     | 1681.8884 | 48.1   | 1.673584653 |
| 13385652 | TPVEPEVAIHR             | ribosomal protein S20 [Mus musculus]                                                             | 1247.6794 | 57.35  | 1.006513888 |
| 19882201 | TPVQSQQPSATTPSGADEK     | proteasome 26S non-ATPase subunit 2 [Mus musculus]                                               | 1928.9226 | 81.12  | 1.135387923 |
| 18250284 | TPYTDVNIIVTIR           | isocitrate dehydrogenase 3 (NAD+) alpha [Mus musculus]                                           | 1391.7518 | 30.24  | 1.45944428  |
| 31980726 | TQAYPDQKPGTSGLR         | phosphoglucomutase 2 [Mus musculus]                                                              | 1618.8207 | 45.86  | 1.454429659 |
| 6678752  | TQDDVDIADVAYFEK         | lymphocyte antigen 74 [Mus musculus]                                                             | 1891.875  | 88.07  | 1.528634476 |
| 9055214  | TQGNVFATDAILATLMSCTR    | eukaryotic translation initiation factor 3, subunit 7 (zeta) [Mus musculus]                      | 2113.0488 | 23.48  | 0           |
| 16716353 | TQIDHYVGIAR             | reticulon 3 isoform 4 [Mus musculus]                                                             | 1272.6707 | 20.42  | 0           |
| 33598964 | TQLELEDELQATEDAK        | myosin heavy chain 10, non-muscle [Mus musculus]                                                 | 1961.9248 | 99.96  | 0.942396463 |
| 20137006 | TQLELEDELQATEDAK        | myosin, heavy polypeptide 9, non-muscle [Mus musculus]                                           | 1961.9248 | 99.96  | 0.942396463 |
| 31980636 | TQQTNDIELQQEQR          | mannosidase, beta A, lysosomal [Mus musculus]                                                    | 1730.8357 | 51.78  | 2.74135077  |
| 63748678 | TQSDKLEPSR              | PREDICTED: hypothetical protein LOC73809 [Mus musculus]                                          | 1257.6459 | 21.95  | 0           |
| 21450277 | TSATWFALSR              | Na+/K+ -ATPase alpha 1 subunit [Mus musculus]                                                    | 1139.5925 | 21.26  | 1.933553041 |
| 33563270 | TSFDEMLPGTHFQR          | oxoglutarate dehydrogenase (lipoamide) [Mus musculus]                                            | 1665.7761 | 36.95  | 1.254324516 |

|          |                                |                                                                                                     |                                                         |           |             |             |
|----------|--------------------------------|-----------------------------------------------------------------------------------------------------|---------------------------------------------------------|-----------|-------------|-------------|
| 51491845 | TSIDAYDNFDNISLAQR              | clathrin, heavy polypeptide (Hc) [Mus musculus]                                                     | 1942.9224                                               | 71.93     | 1.283160978 |             |
| 51765817 | TSPNEGLSGNPADLER               | PREDICTED: plasma membrane calcium ATPase 1 [Mus musculus]                                          | 1656.7913                                               | 19.76     | 1.916235559 |             |
| 6678359  | TSRPENAIISNNEDFQVGGQAK         | transketolase [Mus musculus]                                                                        | 2481.1987                                               | 65.15     | 1.112357779 |             |
| 21313262 | TSSAEMPTIPLGSAVEAIR            | inner membrane protein, mitochondrial [Mus musculus]                                                | 1929.9951                                               | 45.63     | 1.339929492 |             |
| 6753294  | TSVQTEDDQLIAGQSAR              | catenin alpha 1 [Mus musculus]                                                                      | 1818.8816                                               | 46.93     | 1.442340004 |             |
| 6679761  | TTEDEPSEKDALQPGR               | fructose biphosphatase 2 [Mus musculus]                                                             | 1772.8347                                               | 58.76     | 1.612350161 |             |
| 40254802 | TTEKNVNLKISNNK                 | 2 Deamidation (NQ)                                                                                  | 1604.8295                                               | 19.13     | 0           |             |
| 6671507  | TTGIVLDSGDGVTHNVPIYEGYALPHAIMR | hypothetical protein LOC215112 [Mus musculus]                                                       | 3196.6106                                               | 84.31     | 0.37461476  |             |
| 6671509  | TTGIVMDSGDGVTHVPIYEGYALPHAILR  | actin, alpha 2, smooth muscle, aorta [Mus musculus]                                                 | 3183.6111                                               | 122.04    | 0.978221853 |             |
| 30425250 | TTGIVMDSGDGVTHVPIYEGYALPHAILR  | actin, beta, cytoplasmic [Mus musculus]                                                             | 3183.6111                                               | 122.04    | 0.978221853 |             |
| 31981515 | TTHFVEGGDAGNREDQINR            | hypothetical protein LOC238880 [Mus musculus]                                                       | 2115.9856                                               | 44.12     | 1.058216216 |             |
| 6754556  | TTIPEEEEEEEPIGVAVEEER          | ribosomal protein L7 [Mus musculus]                                                                 | 2672.1995                                               | 143.67    | 0.688234615 |             |
| 7305163  | TTPSYVAFDTDER                  | lamin B1 [Mus musculus]                                                                             | 1487.7081                                               | 84.28     | 1.521449134 |             |
| 31981690 | TTPSYVAFDTDER                  | heat shock protein 1-like [Mus musculus]                                                            | 1487.7081                                               | 84.28     | 1.521449134 |             |
| 63704924 | TTPSYVAFDTDER                  | heat shock protein 8 [Mus musculus]                                                                 | 1487.7081                                               | 84.28     | 1.521449134 |             |
| 24429590 | TTQVPQYILDDFIQNDR              | PREDICTED: heat shock protein 1B [Mus musculus]                                                     | 2066.0178                                               | 35.54     | 0.772641992 |             |
| 31981828 | TTYQALPCLPSMYSYPNR             | DEAH (Asp-Glu-Ala-His) box polypeptide 9 [Mus musculus]                                             | 2104.9812                                               | 20.62     | 0           |             |
| 6679601  | TVFDEAIR                       | coatomer protein complex subunit alpha [Mus musculus]                                               | 950.4985                                                | 19.85     | 0.978218224 |             |
| 6753428  | TVGMVAGDEETYEVFALFDPVIQER      | RAS-related C3 botulinum substrate 2 [Mus musculus]                                                 | 2944.4136                                               | 68.15     | 1.438361563 |             |
| 33859811 | TVLGVPEVLLGILPGAGGTQR          | creatine kinase, mitochondrial 1, ubiquitous [Mus musculus]                                         | 2047.1974                                               | 41.88     | 2.235264462 |             |
| 33859506 | TMDDFAQFLDTCK                  | hydroxyacyl-Coenzyme A dehydrogenase/3-ketoacyl-Coenzyme A thiolase/enoyl-Coenzyme A hydratase (tri | 1736.7335                                               | 92.37     | 2.533438091 |             |
| 21729786 | TVQQHAGETDPVTTMR               | albumin 1 [Mus musculus]                                                                            | 1770.8474                                               | 29.72     | 0           |             |
| 21361209 | TVTAMDVVYALK                   | hydroxyacyl glutathione hydrolase [Mus musculus]                                                    | 1310.6997                                               | 77.78     | 0.566080057 |             |
| 8567336  | TVTLELLDNGAGADATK              | germinal histone H4 [Mus musculus]                                                                  | 1688.8733                                               | 108.51    | 0           |             |
| 31981690 | TVTNAVVTVPYAFNDSQR             | chloride channel calcium activated 3 [Mus musculus]                                                 | 1982.0112                                               | 103.71    | 1.573181775 |             |
| 9625006  | TVTQVVPAGQENGQR                | heat shock protein 8 [Mus musculus]                                                                 | 1712.8621                                               | 27.91     | 0           |             |
| 31981722 | TWNDPSVQQDIK                   | apoptotic chromatin condensation inducer 1 [Mus musculus]                                           | 1430.6968                                               | 75.03     | 1.158553233 |             |
| 47059123 | TYAVSHTQEDLNR                  | heat shock 70kD protein 5 (glucose-regulated protein) [Mus musculus]                                | 1533.7346                                               | 45.31     | 0           |             |
| 29789080 | TYLPSQVSR                      | UDP glucuronosyltransferase 1 family, polypeptide A10 [Mus musculus]                                | 1050.5636                                               | 21.19     | 1.178019222 |             |
| 23346461 | TYLQALPYFDR                    | coatomer protein complex, subunit beta 2 (beta prime) [Mus musculus]                                | 1386.7062                                               | 34.38     | 1.525194973 |             |
| 13384828 | TYNFLPEYLASTQK                 | NADH dehydrogenase (ubiquinone) Fe-S protein 2 [Mus musculus]                                       | 1674.8407                                               | 47.47     | 1.603193345 |             |
| 21704128 | VAAVQPPEEGPSR                  | serine (or cysteine) proteinase inhibitor, clade B, member 1a [Mus musculus]                        | 1336.6938                                               | 43.15     | 1.395592209 |             |
| 6680175  | VADALASAAGHLDDLPGALSALSDLHAHK  | eukaryotic translation initiation factor 4B [Mus musculus]                                          | 2836.4441                                               | 31.56     | 0.374784904 |             |
| 7709980  | VADIGLAAWGR                    | hemoglobin alpha 1 chain [Mus musculus]                                                             | 1128.6177                                               | 46.09     | 1.314479574 |             |
| 31981549 | VAELNPDENCIR                   | S-adenosylhomocysteine hydrolase [Mus musculus]                                                     | 1372.6569                                               | 31.83     | 1.867543936 |             |
| 21312260 | VAEQTPLSALYASLIK               | sulfide quinone reductase-like [Mus musculus]                                                       | 1817.0424                                               | 47.49     | 1.584786612 |             |
| 6753036  | VAEQTPLTALYVANLIK              | aldehyde dehydrogenase 1 family, member B1 [Mus musculus]                                           | 1844.0542                                               | 65.05     | 1.526680022 |             |
| 13385680 | VAGHPDVVINNAAGNFISPSE          | aldehyde dehydrogenase 2, mitochondrial [Mus musculus]                                              | 2264.1448                                               | 36.14     | 2.117972119 |             |
| 63476037 | VAIAQFSDDVR                    | 2,4-dienoyl CoA reductase 1, mitochondrial [Mus musculus]                                           | PREDICTED: procollagen, type VI, alpha 3 [Mus musculus] | 1220.6265 | 63.34       | 0.880258767 |
| 31980648 | VALTGLTVAEYFR                  | ATP synthase, H+ transporting mitochondrial F1 complex, beta subunit [Mus musculus]                 | 1439.7972                                               | 75.47     | 1.546065287 |             |
| 18079339 | VAMSHFEPSEYIR                  | aconitase 2, mitochondrial [Mus musculus]                                                           | 1565.7487                                               | 36.96     | 1.712313782 |             |
| 31542559 | VAPAPAGVFTDIPISNIR             | dihydropyridine S-acetyltransferase (E2 component of pyruvate dehydrogenase complex) [Mus musculus] | 1838.0171                                               | 24.4      | 1.565169268 |             |
| 6671507  | VAPEEHPTLLTEAPLNPK             | actin, alpha 2, smooth muscle, aorta [Mus musculus]                                                 | 1956.0693                                               | 95.18     | 0.415010553 |             |
| 6671509  | VAPEEHPVLLTEAPLNPK             | actin, beta, cytoplasmic [Mus musculus]                                                             | 1954.0872                                               | 96.48     | 1.01717276  |             |
| 13385598 | VAQLEQVYIR                     | small nuclear ribonucleoprotein D3 [Mus musculus]                                                   | 1218.6836                                               | 30.7      | 1.283644367 |             |
| 63746482 | VAQPSITDNKDGTVTVR              | PREDICTED: filamin, alpha [Mus musculus]                                                            | 1800.9541                                               | 64.84     | 1.474953801 |             |
| 33563270 | VASSVPVENFTIHGGLSR             | oxoglutarate dehydrogenase (lipoamide) [Mus musculus]                                               | 1869.9813                                               | 45.55     | 1.464301837 |             |
| 63746482 | VATVPQHATSGPGPADVSK            | PREDICTED: filamin, alpha [Mus musculus]                                                            | 1818.9548                                               | 93.39     | 0.907604072 |             |
| 31982186 | VAVLGASGGIGQPLSLLLK            | malate dehydrogenase 2, NAD (mitochondrial) [Mus musculus]                                          | 1793.0912                                               | 47.96     | 1.452973878 |             |
| 33859580 | VAVNDAHLLQYNHR                 | galectin-3 [Mus musculus]                                                                           | 1649.8595                                               | 57.75     | 1.486893385 |             |
| 31982030 | VAVSADPNVPNVIVTR               | Rho GDP dissociation inhibitor (GDI) alpha [Mus musculus]                                           | 1650.9247                                               | 45.43     | 1.049228411 |             |
| 6753484  | VAVVQYSGGQQQPGR                | procollagen, type VI, alpha 1 [Mus musculus]                                                        | 1701.8763                                               | 81.58     | 0.640720765 |             |
| 63556656 | VAYDLVYYVR                     | PREDICTED: RIKEN cDNA A430096B05 gene [Mus musculus]                                                | 1260.6543                                               | 29.38     | 0.177836154 |             |
| 8567336  | VAYLQVPGTAK                    | chloride channel calcium activated 3 [Mus musculus]                                                 | 1146.6511                                               | 64.34     | 0.261521939 |             |
| 46849705 | VAYNPFPGPGQFFDLSIR             | lectin, galactose binding, soluble 4 [Mus musculus]                                                 | 1927.976                                                | 65.24     | 1.749655514 |             |
| 42415475 | VDATEESDLAQYGYR                | prolyl 4-hydroxylase, beta polypeptide [Mus musculus]                                               | 1780.8408                                               | 95.26     | 1.092039123 |             |
| 45598381 | VDCTQHYAVCSEHQVR               | thioredoxin domain containing 5 [Mus musculus]                                                      | 1874.8312                                               | 31.56     | 0.917483429 |             |
| 6678219  | VDDPAGMLLAFFR                  | TAP binding protein [Mus musculus]                                                                  | 1375.7043                                               | 26.28     | 1.108120457 |             |
| 54607098 | VDEYDYSKPIGQQQK                | succinate dehydrogenase Fp subunit [Mus musculus]                                                   | 1797.874                                                | 87.19     | 1.388352956 |             |
| 31982186 | VDFPQDQLATLTR                  | malate dehydrogenase 2, NAD (mitochondrial) [Mus musculus]                                          | 1560.8032                                               | 55.37     | 1.436643127 |             |

|          |                               |                  |                                                                                                |           |        |             |
|----------|-------------------------------|------------------|------------------------------------------------------------------------------------------------|-----------|--------|-------------|
| 63738313 | VDINAPDVVDR                   |                  | PREDICTED: similar to AHNAK [Mus musculus]                                                     | 1212.6277 | 26.19  | 2.415544378 |
| 63556656 | VDLPATVLTSVSVR                |                  | PREDICTED: RIKEN cDNA A430096B05 gene [Mus musculus]                                           | 1456.84   | 71.63  | 0.21833796  |
| 20149728 | VDNSSLTGESEPPQAR              |                  | ATPase, H+/K+ transporting, nongastric, alpha polypeptide [Mus musculus]                       | 1589.752  | 38.66  | 4.436057586 |
| 9055170  | VDNSSLTGESEPPQTR              |                  | ATPase, H+/K+ transporting, alpha polypeptide [Mus musculus]                                   | 1619.7648 | 108.97 | 1.515222526 |
| 30409956 | VDNSSLTGESEPPQTR              |                  | ATPase, Na+/K+ transporting, alpha 2 polypeptide [Mus musculus]                                | 1619.7648 | 108.97 | 1.515222526 |
| 21450277 | VDNSSLTGESEPPQTR              |                  | Na+/K+ -ATPase alpha 1 subunit [Mus musculus]                                                  | 1619.7648 | 108.97 | 1.515222526 |
| 33186863 | VDTWFNQPAR                    |                  | ribosomal protein L13 [Mus musculus]                                                           | 1233.6064 | 26.65  | 1.181056659 |
| 63746482 | VDVGKQDEFTVK                  |                  | PREDICTED: filamin, alpha [Mus musculus]                                                       | 1364.7039 | 54.56  | 0.996622842 |
| 33859722 | VDVTEQTGLSGR                  |                  | thioredoxin domain containing 1 [Mus musculus]                                                 | 1261.6395 | 50.75  | 1.070388468 |
| 7305295  | VDYNASAWLTK                   |                  | myosin, heavy polypeptide 11, smooth muscle [Mus musculus]                                     | 1267.632  | 74.1   | 1.35739054  |
| 7305295  | VEDMAELTCLNEASVLHNLK          |                  | myosin, heavy polypeptide 11, smooth muscle [Mus musculus]                                     | 2257.0957 | 48.33  | 0.745460724 |
| 21313356 | VEEFSLPDALNEGQVQVR            |                  | zinc binding alcohol dehydrogenase, domain containing 1 [Mus musculus]                         | 2030.0012 | 29.25  | 1.838328048 |
| 63540743 | VEESTQVGGDPFPAVFGDFLGR        |                  | PREDICTED: filamin C, gamma [Mus musculus]                                                     | 2324.0952 | 26.95  | 0.549870607 |
| 31542333 | VEFEELCADLFDR                 |                  | hypoxia up-regulated 1 [Mus musculus]                                                          | 1585.7368 | 23.6   | 1.04037842  |
| 31543315 | VEGSEPTTFFNLFIGNLNPNK         |                  | nucleolin [Mus musculus]                                                                       | 2288.1665 | 61.24  | 1.823862775 |
| 31981722 | VEIIANDQGNR                   |                  | heat shock 70kD protein 5 (glucose-regulated protein) [Mus musculus]                           | 1228.6362 | 55.5   | 1.169428303 |
| 7305163  | VEIIANDQGNR                   |                  | heat shock protein 1-like [Mus musculus]                                                       | 1228.6362 | 55.5   | 1.169428303 |
| 31981690 | VEIIANDQGNR                   |                  | heat shock protein 8 [Mus musculus]                                                            | 1228.6362 | 55.5   | 1.169428303 |
| 63704924 | VEIIANDQGNR                   |                  | PREDICTED: heat shock protein 1B [Mus musculus]                                                | 1228.6362 | 55.5   | 1.169428303 |
| 63664182 | VEIIANDQGNR                   |                  | PREDICTED: similar to heat shock protein 8 [Mus musculus]                                      | 1228.6362 | 55.5   | 1.169428303 |
| 33563250 | VELQELNDR                     |                  | desmin [Mus musculus]                                                                          | 1115.5737 | 45.5   | 0.672979362 |
| 31982755 | VELQELNDR                     |                  | vimentin [Mus musculus]                                                                        | 1115.5737 | 45.5   | 0.672979362 |
| 63746482 | VEPGLGADNSVVR                 |                  | PREDICTED: filamin, alpha [Mus musculus]                                                       | 1312.6913 | 76.64  | 0.707938081 |
| 11230802 | VEQIAAIAQELNELDYYDSHVNTR      |                  | actinin alpha 4 [Mus musculus]                                                                 | 2905.3979 | 26.29  | 1.339027461 |
| 20373167 | VEQLGAEGNVEESQK               |                  | LUC7-like 2 [Mus musculus]                                                                     | 1616.7791 | 59.97  | 1.19492307  |
| 30578429 | VEQLSSGLEHNDLEAHSPEQPPR       |                  | hypothetical protein LOC94184 [Mus musculus]                                                   | 2569.2305 | 57.28  | 1.280960191 |
| 51873060 | VEVGVLKPGMVVTFAPVNVTVTEVK     |                  | eukaryotic translation elongation factor 1 alpha 1 [Mus musculus]                              | 2515.3984 | 98.27  | 1.211575073 |
| 33859482 | VFDAMNFR                      |                  | eukaryotic translation elongation factor 2 [Mus musculus]                                      | 1112.5571 | 47.03  | 0           |
| 6680067  | VFEGNRPTNSIVFTK               |                  | glucose phosphate isomerase 1 [Mus musculus]                                                   | 1708.9014 | 20.61  | 1.058797278 |
| 21361209 | VFLENVIR                      |                  | germinal histone H4 [Mus musculus]                                                             | 989.5799  | 41.12  | 0.666060182 |
| 31980726 | VFQSNANYAENFIQIVSTVEPALR      |                  | phosphoglucomutase 2 [Mus musculus]                                                            | 2797.4236 | 27.82  | 1.155172033 |
| 6753484  | VFSVAITPDHLEPR                |                  | procollagen, type VI, alpha 1 [Mus musculus]                                                   | 1580.847  | 67.03  | 0.448451991 |
| 31981549 | VGAENVAIVEPSEK                |                  | sulfide quinone reductase-like [Mus musculus]                                                  | 1469.7654 | 65.6   | 1.675251631 |
| 6755809  | VGAIPANALDDGQWSQGLISAAR       |                  | talin 1 [Mus musculus]                                                                         | 2310.1812 | 72.29  | 1.116652508 |
| 6755478  | VGDVYIPR                      |                  | splicing factor, arginine/serine-rich 2 [Mus musculus]                                         | 918.5015  | 39.82  | 1.480565265 |
| 63638100 | VGINYQPPTVPPGGDLAK            |                  | PREDICTED: similar to tubulin, alpha 1 [Mus musculus]                                          | 1824.9877 | 46.23  | 1.236715243 |
| 6755901  | VGINYQPPTVPPGGDLAK            |                  | tubulin, alpha 1 [Mus musculus]                                                                | 1824.9877 | 46.23  | 1.236715243 |
| 34740335 | VGINYQPPTVPPGGDLAK            |                  | tubulin, alpha 2 [Mus musculus]                                                                | 1824.9877 | 46.23  | 1.236715243 |
| 6678467  | VGINYQPPTVPPGGDLAK            |                  | tubulin, alpha 4 [Mus musculus]                                                                | 1824.9877 | 46.23  | 1.236715243 |
| 6678469  | VGINYQPPTVPPGGDLAK            |                  | tubulin, alpha 6 [Mus musculus]                                                                | 1824.9877 | 46.23  | 1.236715243 |
| 63476037 | VGLVQYNSDPTDEFFLR             |                  | PREDICTED: procollagen, type VI, alpha 3 [Mus musculus]                                        | 1999.9796 | 20.36  | 0.969244229 |
| 63476037 | VGLVQYNSDPTDEFFLR             | Deamidation (NQ) | PREDICTED: procollagen, type VI, alpha 3 [Mus musculus]                                        | 2000.9603 | 59.5   | 0           |
| 6753620  | VGNLGLATSAFFNER               | Deamidation (NQ) | DEAD/H (Asp-Glu-Ala-Asp/His) box polypeptide 3, X-linked [Mus musculus]                        | 1525.7828 | 31.89  | 0           |
| 21312260 | VGNPFELDTQQGPQVDKEQFER        |                  | aldehyde dehydrogenase 1 family, member B1 [Mus musculus]                                      | 2561.2263 | 87.44  | 1.725544121 |
| 7242148  | VGQIEVVRPGIVSK                |                  | eukaryotic translation initiation factor 2, subunit 3, structural gene Y-linked [Mus musculus] | 1510.8666 | 29.39  | 1.41427943  |
| 63746482 | VGSAADIPINISSETDLSLLTATVPPSGR |                  | PREDICTED: filamin, alpha [Mus musculus]                                                       | 2893.552  | 101.1  | 0.767936025 |
| 16716467 | VGSQDNTNFPYLEK                |                  | N-acetylneuraminic acid synthase (sialic acid synthase) [Mus musculus]                         | 1540.7268 | 29.22  | 1.50056085  |
| 46849705 | VGSQDIALHLNPR                 |                  | lectin, galactose binding, soluble 4 [Mus musculus]                                            | 1435.7771 | 91.51  | 1.416511902 |
| 6679937  | GVVNGFGR                      |                  | similar to glyceraldehyde-3-phosphate dehydrogenase [Mus musculus]                             | 805.4317  | 20.24  | 2.068008791 |
| 63680429 | GVVQQPEDSQDLPGER              |                  | PREDICTED: plexin B2 [Mus musculus]                                                            | 1968.9321 | 72.81  | 1.108516879 |
| 11230802 | VGWEQLLTIAR                   |                  | actinin alpha 4 [Mus musculus]                                                                 | 1386.7798 | 47.83  | 1.173937239 |
| 6679937  | VIIISAPADAPMFVMGVNHEK         |                  | similar to glyceraldehyde-3-phosphate dehydrogenase [Mus musculus]                             | 2213.1187 | 75.44  | 0           |
| 51772343 | VIIISAPADAPMFVMGVNHEK         | Oxidation (M)    | PREDICTED: similar to glyceraldehyde-3-phosphate dehydrogenase [Mus musculus]                  | 2219.0828 | 23.88  | 0           |
| 33469063 | VILQDFTGVPVAVDFAAMR           |                  | aconitase 1 [Mus musculus]                                                                     | 2049.0693 | 19.4   | 1.76928236  |
| 9055170  | VIMVTGDHPITAK                 |                  | ATPase, H+/K+ transporting, alpha polypeptide [Mus musculus]                                   | 1381.7427 | 33.07  | 0           |
| 20149728 | VIMVTGDHPITAK                 |                  | ATPase, H+/K+ transporting, nongastric, alpha polypeptide [Mus musculus]                       | 1381.7427 | 33.07  | 0           |
| 30409956 | VIMVTGDHPITAK                 |                  | ATPase, Na+/K+ transporting, alpha 2 polypeptide [Mus musculus]                                | 1381.7427 | 33.07  | 0           |
| 21450277 | VIMVTGDHPITAK                 |                  | Na+/K+ -ATPase alpha 1 subunit [Mus musculus]                                                  | 1381.7427 | 33.07  | 0           |
| 20137006 | VISGVLQLGNIQAFK               |                  | myosin, heavy polypeptide 9, non-muscle [Mus musculus]                                         | 1458.8672 | 70.73  | 1.071596497 |
| 45597447 | VISLSGEHSIIGR                 |                  | superoxide dismutase 1, soluble [Mus musculus]                                                 | 1367.7676 | 58.29  | 1.471375922 |

|          |                                                      |                    |                                                                                                     |           |        |             |
|----------|------------------------------------------------------|--------------------|-----------------------------------------------------------------------------------------------------|-----------|--------|-------------|
| 11230802 | VLA>VNQE>NEHLMEDYER                                  |                    | actinin alpha 4 [Mus musculus]                                                                      | 2088.9641 | 66.38  | 1.316170716 |
| 33413404 | VL>VINPG>NPTG>QV>QTR                                 | 3 Deamidation (NQ) | glutamic pyruvic transaminase 1, soluble [Mus musculus]                                             | 1798.8788 | 19.81  | 0           |
| 6678449  | VLD>AS>W>Y>SPG>TR                                    |                    | thiosulfate sulfurtransferase, mitochondrial [Mus musculus]                                         | 1351.6678 | 28.99  | 1.75639206  |
| 6680606  | VL>DEL>T>L>AR                                        |                    | keratin complex 1, acidic, gene 19 [Mus musculus]                                                   | 1029.5942 | 40.48  | 1.988786781 |
| 51766008 | VLD>NT>W>PA>AP>YR                                    |                    | PREDICTED: myosin IA [Mus musculus]                                                                 | 1402.7166 | 35.55  | 1.579284561 |
| 15617203 | VLD>N>Y>L>T>S>P>L>E>E>V>D>E>T>S>A>E>D>E>G>I>S>Q>R    |                    | chloride intracellular channel 1 [Mus musculus]                                                     | 3006.4043 | 120.5  | 1.216780622 |
| 6678359  | VLD>P>F>T>I>K>L>D>R                                  |                    | transketolase [Mus musculus]                                                                        | 1413.8038 | 22.11  | 0.955763737 |
| 31980648 | VLD>S>G>A>P>I>K>I>P>V>G>P>E>T>L>G>R                  |                    | ATP synthase, H+ transporting mitochondrial F1 complex, beta subunit [Mus musculus]                 | 1919.0908 | 46.95  | 1.334558272 |
| 40068493 | VLE>E>A>N>Q>A>I>N>P>K                                |                    | DEAD box polypeptide 17 isoform 1 [Mus musculus]                                                    | 1325.7023 | 69.82  | 1.168320567 |
| 19923052 | VLE>V>P>I>V>I>Y>L>R                                  |                    | brain acyl-CoA hydrolase [Mus musculus]                                                             | 1297.7896 | 29.67  | 1.401888017 |
| 6754854  | VLF>D>T>G>L>V>N>P>R                                  |                    | nidogen 1 [Mus musculus]                                                                            | 1230.687  | 31.77  | 0           |
| 29336026 | VL>G>L>L>P>E>E>I>T>A>M>L>R                           |                    | nonmuscle myosin heavy chain [Mus musculus]                                                         | 1554.9014 | 32.29  | 2.731994885 |
| 63655455 | VL>G>S>I>S>S>L>D>L>L>P>Y>G>L>R                       |                    | PREDICTED: similar to Ras GTPase-activating-like protein IQGAP2 [Mus musculus]                      | 1816.0551 | 29.94  | 1.156472581 |
| 27804325 | VL>G>S>Q>E>A>L>S>P>V>H>Y>E>E>K                       |                    | monoamine oxidase A [Mus musculus]                                                                  | 1785.9097 | 89.89  | 1.986617775 |
| 6753484  | VLL>F>S>D>G>N>S>Q>G>A>T>A>E>A>I>E>K                  |                    | procollagen, type VI, alpha 1 [Mus musculus]                                                        | 1949.9597 | 66.3   | 0           |
| 6679291  | VL>N>N>M>E>I>G>T>S>L>Y>D>E>E>G>A>K                   |                    | phosphoglycerate kinase 1 [Mus musculus]                                                            | 1982.9625 | 24.12  | 0           |
| 38080000 | VL>N>S>Y>V>V>G>E>D>S>T>Y>K                           |                    | PREDICTED: similar to ribosomal protein L15 [Mus musculus]                                          | 1660.7834 | 24.93  | 1.160124482 |
| 7948997  | VL>Q>D>L>V>N>D>G>P>D>D>R>P>A>G>T>R                   |                    | PDZ and LIM domain 3 [Mus musculus]                                                                 | 1937.9752 | 36.79  | 0.960588279 |
| 13384736 | VLR>P>Q>V>T>A>V>A>Q>Q>N>Q>G>E>A>P>E>P>Q>D>M>K        |                    | dynein, cytoplasmic, heavy chain 1 [Mus musculus]                                                   | 2634.3259 | 25.94  | 1.37856784  |
| 6680748  | VLS>I>G>D>G>I>A>R                                    |                    | ATP synthase, H+ transporting, mitochondrial F1 complex, alpha subunit, isoform 1 [Mus musculus]    | 1000.5763 | 35.63  | 1.463127857 |
| 63556656 | VLS>P>L>E>Y>F>R                                      |                    | PREDICTED: RIKEN cDNA A430096B05 gene [Mus musculus]                                                | 1123.6193 | 39.28  | 0.278591158 |
| 6671622  | VLS>R>P>N>A>Q>L>P>S>M>Y>Q>R                          |                    | B-cell receptor-associated protein 37 [Mus musculus]                                                | 1888.9774 | 23.81  | 1.668438897 |
| 6755626  | VLS>Y>A>P>G>P>L>D>N>D>M>Q>Q>L>A>R                    |                    | sepiapterin reductase [Mus musculus]                                                                | 1987.9971 | 27.94  | 1.669754748 |
| 10946574 | VLT>P>E>L>Y>A>E>L>R                                  |                    | creatine kinase, brain [Mus musculus]                                                               | 1303.7273 | 49.81  | 0.67280307  |
| 7657429  | VLT>Q>I>G>T>S>I>Q>D>F>L>E>A>E>D>L>S>S>F>R            |                    | osteoblast specific factor 2 (fasciclin I-like) [Mus musculus]                                      | 2584.2769 | 64.13  | 1.636587095 |
| 6679078  | VML>G>E>T>N>P>A>D>S>K>P>G>T>I>R                      |                    | nucleoside-diphosphate kinase 2 [Mus musculus]                                                      | 1785.9182 | 64.1   | 1.15137313  |
| 34576561 | VM>Q>Q>Q>Q>A>T>Q>Q>L>P>Q>K                           |                    | splicing factor 3a, subunit 1 [Mus musculus]                                                        | 1911.9756 | 76.17  | 1.391025553 |
| 34576561 | VM>Q>Q>Q>Q>A>T>Q>Q>L>P>Q>K                           | Oxidation (M)      | splicing factor 3a, subunit 1 [Mus musculus]                                                        | 1927.9689 | 32     | 0           |
| 31543113 | VND>I>I>V>N>W>V>N>T>L>K                              |                    | lymphocyte cytosolic protein 1 [Mus musculus]                                                       | 1743.9053 | 19.02  | 0           |
| 63517295 | VNE>A>A>PE>K>P>Q>E>D>S>G>T>A>G>G>I>S>S>T>S>A>S>V>N>R |                    | PREDICTED: RIKEN cDNA 1810009A16 [Mus musculus]                                                     | 2759.292  | 40.68  | 0           |
| 31560611 | VNE>ST>Q>N>W>H>Q>L>E>N>I>G>N>F>I>K                   |                    | calponin 1 [Mus musculus]                                                                           | 2271.1304 | 58.12  | 0           |
| 7305085  | VNF>D>D>Y>T>V>N>L>G>L>K                              |                    | glutamine fructose-6-phosphate transaminase 1 [Mus musculus]                                        | 1554.7612 | 34     | 0           |
| 33859482 | VN>F>T>V>D>Q>I>R                                     |                    | eukaryotic translation elongation factor 2 [Mus musculus]                                           | 1091.5886 | 57.52  | 1.114007823 |
| 6678752  | VNG>E>P>L>D>L>D>P>G>Q>T>L>I>Y>V>D>E>K                | Deamidation (NQ)   | lymphocyte antigen 74 [Mus musculus]                                                                | 2379.1555 | 24.15  | 0           |
| 7305445  | VNG>R>P>L>E>M>I>E>P>R                                |                    | ribosomal protein S16 [Mus musculus]                                                                | 1410.755  | 19.7   | 0           |
| 63556656 | VNG>V>L>M>A>L>P>V>Y>L>A>G>G>R                        |                    | PREDICTED: RIKEN cDNA A430096B05 gene [Mus musculus]                                                | 1629.9163 | 41.71  | 0.347769078 |
| 9790069  | VN>I>A>F>N>Y>D>M>P>E>D>S>D>T>Y>L>H>R                 |                    | HLA-B-associated transcript 1A [Mus musculus]                                                       | 2300.0347 | 45.82  | 0.911708489 |
| 6755967  | VNN>A>S>L>I>G>L>G>Y>T>Q>L>R>P>G>V>K                  |                    | voltage-dependent anion channel 3 [Mus musculus]                                                    | 2101.1782 | 44.47  | 1.655734998 |
| 6755963  | VNN>S>S>L>I>G>L>G>Y>T>Q>L>K>P>G>I>K                  |                    | voltage-dependent anion channel 1 [Mus musculus]                                                    | 2103.1826 | 70.11  | 2.29619861  |
| 6755965  | VNN>S>S>L>I>G>V>G>Y>T>Q>L>R>P>G>V>K                  |                    | voltage-dependent anion channel 2 [Mus musculus]                                                    | 2103.1565 | 77     | 1.257530289 |
| 6679439  | VN>P>T>V>F>F>D>I>T>A>D>D>E>P>L>G>R                   |                    | peptidylprolyl isomerase A [Mus musculus]                                                           | 2005.9879 | 79.49  | 1.198167929 |
| 6679439  | VN>P>T>V>F>F>D>I>T>A>D>D>E>P>L>G>R                   | Deamidation (NQ)   | peptidylprolyl isomerase A [Mus musculus]                                                           | 2006.9878 | 25.57  | 0           |
| 63529263 | VNV>Q>E>T>I>P>Y>R>V>M>H>D>K                          | Deamidation (NQ)   | PREDICTED: Nedd4 binding protein 2 [Mus musculus]                                                   | 1829.9215 | 20.3   | 0           |
| 31981824 | VP>A>P>E>V>A>S>G>P>D>P>E>E>E>I>R                     |                    | ankyrin repeat domain 25 [Mus musculus]                                                             | 1791.8953 | 26.94  | 0           |
| 19525729 | VP>D>D>P>E>H>L>A>A>R                                 |                    | crystallin, lamda 1 [Mus musculus]                                                                  | 1219.6093 | 28.21  | 0           |
| 13385168 | VP>D>F>S>D>Y>R                                       |                    | ubiquinol-cytochrome c reductase, Rieske iron-sulfur polypeptide 1 [Mus musculus]                   | 998.4586  | 37.5   | 1.644238113 |
| 6755714  | VP>EN>P>PS>M>V>F>K                                   |                    | transgelin [Mus musculus]                                                                           | 1244.6327 | 51.1   | 0           |
| 18079351 | VPH>N>A>A>V>Q>V>Y>D>Y>R                              |                    | major vault protein [Mus musculus]                                                                  | 1531.772  | 56.69  | 3.191691998 |
| 6753484  | VP>N>Y>Q>A>L>L>R                                     |                    | procollagen, type VI, alpha 1 [Mus musculus]                                                        | 1073.6256 | 36.78  | 0.616403307 |
| 7305443  | VPP>A>I>N>Q>F>T>Q>A>L>D>R                            |                    | ribosomal protein L7a [Mus musculus]                                                                | 1569.8385 | 23     | 1.010990357 |
| 6754090  | VP>PL>I>A>S>F>V>R                                    |                    | glutathione S-transferase omega 1 [Mus musculus]                                                    | 1098.6705 | 44.51  | 1.848291691 |
| 51711855 | VP>Q>L>P>I>T>N>F>N>R                                 |                    | PREDICTED: similar to Filamin C (Gamma-filamin) (Filamin 2) (Protein FLNc) (Actin-binding like prot | 1298.7245 | 23.57  | 0.764383222 |
| 56119103 | VP>ST>E>A>E>A>L>A>S>S>L>M>G>L>F>E>K                  |                    | guanosine diphosphate (GDP) dissociation inhibitor 3 [Mus musculus]                                 | 1980.0006 | 100.63 | 1.198331014 |
| 6679937  | VPT>PN>V>S>V>D>L>T>C>R                               |                    | similar to glyceraldehyde-3-phosphate dehydrogenase [Mus musculus]                                  | 1499.7942 | 96.78  | 1.133319608 |
| 37537522 | VP>V>D>V>A>Y>Q>R                                     |                    | epiplakin 1 [Mus musculus]                                                                          | 1046.5658 | 41.59  | 1.543299696 |
| 46849705 | VP>Y>V>G>A>L>Q>G>L>T>V>R                             |                    | lectin, galactose binding, soluble 4 [Mus musculus]                                                 | 1429.8296 | 107.2  | 1.892353667 |
| 6671700  | VQ>D>D>E>V>G>D>G>T>T>S>V>T>V>L>A>E>L>L>R             |                    | chaperonin subunit 2 (beta) [Mus musculus]                                                          | 2288.1543 | 30.27  | 0           |
| 63552538 | VQ>E>V>E>V>P>E>D>F>G>P>V>R                           |                    | PREDICTED: echinoderm microtubule associated protein like 2 [Mus musculus]                          | 1599.8104 | 55.15  | 1.390606022 |
| 6754256  | VQ>Q>T>V>Q>D>L>F>G>R                                 |                    | heat shock protein 9A [Mus musculus]                                                                | 1290.6843 | 61.63  | 2.296214557 |
| 6754482  | VR>P>A>S>A>A>S>V>Y>A>G>A>G>G>S>G>S>R                 |                    | keratin complex 1, acidic, gene 18 [Mus musculus]                                                   | 1807.9136 | 67.2   | 0.96167516  |

|          |                            |                  |                                                                                                       |           |        |             |
|----------|----------------------------|------------------|-------------------------------------------------------------------------------------------------------|-----------|--------|-------------|
| 21312216 | VSDVVDGNIQGR               |                  | gasdermin domain containing 1 [Mus musculus]                                                          | 1258.6411 | 50.46  | 1.085777644 |
| 37620153 | VSDVYDIEER                 |                  | myosin, light polypeptide kinase telokin isoform [Mus musculus]                                       | 1224.5806 | 53.33  | 1.201038748 |
| 30348966 | VSEEAESQQWDTSK             |                  | spectrin beta 2 isoform 1 [Mus musculus]                                                              | 1623.7134 | 41.83  | 1.236006361 |
| 6679439  | VSFELFADK                  |                  | peptidylprolyl isomerase A [Mus musculus]                                                             | 1055.5443 | 66.62  | 1.447415658 |
| 31982373 | VSISEGDDKIEYR              |                  | fibrillarlin [Mus musculus]                                                                           | 1510.7401 | 33.12  | 0.901379878 |
| 28916693 | VSNAGAGSMSVSLVADENPFAQGALR |                  | gelsolin [Mus musculus]                                                                               | 2477.21   | 54.54  | 0           |
| 28916693 | VSNAGAGSMSVSLVADENPFAQGALR | Deamidation (NQ) | gelsolin [Mus musculus]                                                                               | 2478.2078 | 36.49  | 0           |
| 63556656 | VSQHGSDDVVIETDFGLR         |                  | PREDICTED: RIKEN cDNA A430096B05 gene [Mus musculus]                                                  | 1858.9298 | 35.18  | 0           |
| 31982169 | VSVVEPGNFIAATSLYSPEER      |                  | 3-hydroxybutyrate dehydrogenase (heart, mitochondrial) [Mus musculus]                                 | 2136.1052 | 44.67  | 1.483424318 |
| 6753086  | VSYGIGEEHDDQEGR            |                  | apurinic/apurimidinic endonuclease 1 [Mus musculus]                                                   | 1704.7501 | 20.26  | 0           |
| 31543605 | VTAEVVLVHPGGGSTR           |                  | ribophorin I [Mus musculus]                                                                           | 1665.8988 | 61.46  | 0.88596671  |
| 63746482 | VTAQGGPLEPSGNIANK          |                  | PREDICTED: filamin, alpha [Mus musculus]                                                              | 1652.8651 | 110.21 | 0.802902518 |
| 63660302 | VTASGPGLSAYGVPASLPVEFAIDAR |                  | PREDICTED: filamin B, beta [Mus musculus]                                                             | 2545.3325 | 29.25  | 1.124826572 |
| 31560353 | VTASSENHFVGENDENQER        |                  | solute carrier family 6 (neurotransmitter transporter), member 14 [Mus musculus]                      | 2161.9448 | 69.03  | 1.525828239 |
| 31981722 | VTHAVVTPAYFNDAGR           |                  | heat shock 70kD protein 5 (glucose-regulated protein) [Mus musculus]                                  | 1887.9758 | 112.96 | 0.923332228 |
| 20799907 | VTIAQGGVLPNIQAVLLPK        |                  | histone 2, H2aa1 [Mus musculus]                                                                       | 1931.1812 | 120.29 | 0.950250008 |
| 54607098 | VTLEYRPIVDK                |                  | succinate dehydrogenase Fp subunit [Mus musculus]                                                     | 1332.7532 | 24.15  | 1.500754614 |
| 6755963  | VTQSNFAVGK                 |                  | voltage-dependent anion channel 1 [Mus musculus]                                                      | 1213.6232 | 79.22  | 2.701657988 |
| 63746482 | VTYTPMAPGSYLISIK           |                  | PREDICTED: filamin, alpha [Mus musculus]                                                              | 1740.9042 | 37.5   | 1.477189991 |
| 58037117 | VVAEPVELAQEFR              |                  | NADH dehydrogenase (ubiquinone) Fe-S protein 3 [Mus musculus]                                         | 1486.7961 | 37.03  | 1.435002344 |
| 6755809  | VVAPTISSPVCQEQLVEAGR       |                  | talin 1 [Mus musculus]                                                                                | 2083.0862 | 49.58  | 0           |
| 31980648 | VVDLLAPYAK                 |                  | ATP synthase, H+ transporting mitochondrial F1 complex, beta subunit [Mus musculus]                   | 1088.6276 | 32.44  | 0           |
| 6671549  | VVDSLQLTGTKPVATPVDWK       |                  | peroxiredoxin 6 [Mus musculus]                                                                        | 2154.1824 | 72.49  | 2.398921773 |
| 63476037 | VVESLDVGPDR                |                  | PREDICTED: procollagen, type VI, alpha 3 [Mus musculus]                                               | 1185.6156 | 38.26  | 0           |
| 46849705 | VVFNTMQSQGWGK              |                  | lectin, galactose binding, soluble 4 [Mus musculus]                                                   | 1481.7269 | 65.92  | 2.098706389 |
| 20137006 | VVFQEFR                    |                  | myosin, heavy polypeptide 9, non-muscle [Mus musculus]                                                | 924.4914  | 30.44  | 1.587115466 |
| 27754118 | VVHCSLDGLTSPVNNIPFDTR      |                  | asporin [Mus musculus]                                                                                | 2284.1194 | 25.9   | 0           |
| 34538601 | VVLPMELPIR                 |                  | cytochrome c oxidase subunit II [Mus musculus]                                                        | 1166.7017 | 30.59  | 1.718696836 |
| 13386272 | VVPGYGHAVLR                |                  | citrate synthase-like protein [Mus musculus]                                                          | 1167.6732 | 20.83  | 1.618080295 |
| 13385942 | VVPGYGHAVLR                |                  | citrate synthase [Mus musculus]                                                                       | 1167.6732 | 20.83  | 1.618080295 |
| 26006861 | VVPVADIITPNQFEALLSGR       |                  | pyridoxal (pyridoxine, vitamin B6) kinase [Mus musculus]                                              | 2268.217  | 21.38  | 1.896915633 |
| 7305295  | VVSSVLQLGNIVFK             |                  | myosin, heavy polypeptide 11, smooth muscle [Mus musculus]                                            | 1502.8936 | 96.15  | 0.856502483 |
| 46849705 | VVNGNSFYEYGHR              |                  | lectin, galactose binding, soluble 4 [Mus musculus]                                                   | 1640.7904 | 65.93  | 1.724149197 |
| 46849705 | VVNGNSFYEYGHR              | Deamidation (NQ) | lectin, galactose binding, soluble 4 [Mus musculus]                                                   | 1641.7762 | 46.1   | 1.846114361 |
| 6677773  | VWLDPNETNEIANANSR          |                  | ribosomal protein L19 [Mus musculus]                                                                  | 1942.9236 | 27.47  | 1.196111582 |
| 6680047  | VWQVTIGTR                  |                  | guanine nucleotide binding protein (G protein), beta polypeptide 2 like 1 [Mus musculus]              | 1059.5958 | 41.34  | 1.376293051 |
| 31543474 | VYAEANSQESADR              |                  | phosphoglucomutase 3 [Mus musculus]                                                                   | 1439.6467 | 26.88  | 1.305606419 |
| 21312950 | VYDQMPEPR                  |                  | NADH dehydrogenase (ubiquinone) Fe-S protein 7 [Mus musculus]                                         | 1134.5304 | 41.75  | 1.384364885 |
| 46593021 | VYEEDAVPGLTPCR             |                  | ubiquinol-cytochrome c reductase core protein 1 [Mus musculus]                                        | 1548.7355 | 29.72  | 1.373492797 |
| 63481281 | VYEELLAIPVVR               |                  | PREDICTED: glutamyl-prolyl-tRNA synthetase [Mus musculus]                                             | 1400.8187 | 24.2   | 0           |
| 41322904 | VYHDPSTQEPVTSYQLQQR        |                  | plectin 1 isoform 1 [Mus musculus]                                                                    | 2276.0977 | 37.22  | 1.091824755 |
| 8567400  | VYNYNHLMPTTR               |                  | ribosomal protein L27 [Mus musculus]                                                                  | 1407.6902 | 29.01  | 1.405030186 |
| 33859686 | VYWDNGAQIISPHDR            |                  | phosphoglucomutase 1 [Mus musculus]                                                                   | 1770.8647 | 36.83  | 2.159201795 |
| 30023842 | WALSQSNPSALR               |                  | valosin containing protein [Mus musculus]                                                             | 1329.6946 | 21.59  | 1.983214644 |
| 7305085  | WATHGEPNPNVNSHPQR          |                  | glutamine fructose-6-phosphate transaminase 1 [Mus musculus]                                          | 1826.8787 | 22.71  | 1.421342055 |
| 6753498  | WDYDKNEWK                  |                  | cytochrome c oxidase subunit IV isoform 1 [Mus musculus]                                              | 1283.5814 | 26.82  | 1.414801859 |
| 1346343  | WELLQQVDTSTR               |                  | Keratin, type II cytoskeletal 1 (Cytokeratin 1) (K1) (CK 1) (67 kDa cytokekeratin) (Hair alpha protei | 1475.7472 | 46.45  | 0           |
| 63746482 | WGDEHIPGSPYR               |                  | PREDICTED: filamin, alpha [Mus musculus]                                                              | 1413.6609 | 61.19  | 0.776757625 |
| 31559916 | WGTLTDCVVMR                |                  | heterogeneous nuclear ribonucleoprotein A3 isoform b [Mus musculus]                                   | 1280.614  | 33.33  | 1.212042685 |
| 8567336  | WGVFNEYNDEK                |                  | chloride channel calcium activated 3 [Mus musculus]                                                   | 1514.662  | 91.17  | 0.275918818 |
| 31543942 | WIDNPTVDDR                 |                  | vinculin [Mus musculus]                                                                               | 1230.5824 | 42.68  | 0.780187223 |
| 33859640 | WLHNEQMAVEK                |                  | transaldolase 1 [Mus musculus]                                                                        | 1499.6953 | 65.44  | 1.244959848 |
| 6755963  | WNTDNTLGTIEITVEDQLAR       |                  | voltage-dependent anion channel 1 [Mus musculus]                                                      | 2176.051  | 28.61  | 1.603288309 |
| 31980832 | WQFYQNR                    |                  | keratin complex 2, basic gene 18 [Mus musculus]                                                       | 1041.4995 | 33.54  | 0           |
| 24762230 | WQNNLLPSR                  |                  | ribosomal protein S15a [Mus musculus]                                                                 | 1127.5959 | 40.56  | 1.235997834 |
| 13624315 | WSLLQQQK                   |                  | keratin complex 2, basic, gene 8 [Mus musculus]                                                       | 1030.5645 | 41.19  | 1.784369334 |
| 63565108 | WSLLQQQK                   |                  | PREDICTED: similar to cytokekeratin EndoA - mouse [Mus musculus]                                      | 1030.5645 | 41.19  | 1.784369334 |
| 27804325 | WVDVGGAYVGPQNR             |                  | monoamine oxidase A [Mus musculus]                                                                    | 1618.808  | 96.54  | 2.242640568 |
| 21450277 | WVNDVEDSYGQQWTYEQR         |                  | Na+/K+ -ATPase alpha 1 subunit [Mus musculus]                                                         | 2303.0061 | 97.07  | 1.500930994 |
| 18079339 | WVVIGDENYGEGRSSR           |                  | aconitase 2, mitochondrial [Mus musculus]                                                             | 1667.7738 | 51.16  | 0           |

|          |                            |                  |                                                                                                     |           |        |             |
|----------|----------------------------|------------------|-----------------------------------------------------------------------------------------------------|-----------|--------|-------------|
| 31981549 | YADALQEIR                  |                  | sulfide quinone reductase-like [Mus musculus]                                                       | 1191.6382 | 47.57  | 1.489171365 |
| 31981983 | YAELEEQVR                  |                  | stromal interaction molecule 1 [Mus musculus]                                                       | 1265.6031 | 35.95  | 1.302800966 |
| 9790219  | YALYDASFETK                |                  | destrin [Mus musculus]                                                                              | 1307.6163 | 67.36  | 1.832648187 |
| 6680924  | YALYDATYETK                |                  | cofilin 1, non-muscle [Mus musculus]                                                                | 1337.6346 | 67.96  | 1.501973855 |
| 29244560 | YASASEPTEIYR               |                  | hypothetical protein LOC331063 [Mus musculus]                                                       | 1386.6615 | 52.75  | 0.393820489 |
| 31981828 | YAVTTGDHGIIR               |                  | coatamer protein complex subunit alpha [Mus musculus]                                               | 1302.6833 | 40.55  | 1.198852354 |
| 19482160 | YDGATIVPGDQGDYQHFIQCTDDVR  |                  | coactosin-like 1 [Mus musculus]                                                                     | 3012.3337 | 19.64  | 0.533382462 |
| 6678483  | YDQVAVFGSDFQEK             |                  | ubiquitin-activating enzyme E1, Chr X [Mus musculus]                                                | 1689.7875 | 37.26  | 0           |
| 21704066 | YDPTIEDSYR                 |                  | RAS-related protein-1a [Mus musculus]                                                               | 1258.5701 | 25.68  | 0.697275783 |
| 6755809  | YDQATDILTVTENIFSSMGDAGEMVR |                  | talin 1 [Mus musculus]                                                                              | 2964.3601 | 51.2   | 0.826150103 |
| 37497112 | YDSRPGGYGYGR               |                  | RNA binding motif protein 3 [Mus musculus]                                                          | 1567.7035 | 19.1   | 5.00632257  |
| 9790051  | YEASYDMSDSGK               |                  | phosphofructokinase, platelet [Mus musculus]                                                        | 1352.5437 | 31.55  | 10.12860562 |
| 22267442 | YEDSNLGLTSHLLR             |                  | ubiquinol cytochrome c reductase core protein 2 [Mus musculus]                                      | 1618.7863 | 41.78  | 1.253692992 |
| 27370092 | YEEIDNAPEER                |                  | Tu translation elongation factor, mitochondrial [Mus musculus]                                      | 1364.6022 | 60.34  | 1.545502589 |
| 1346343  | YEELQITAGR                 |                  | Keratin, type II cytoskeletal 1 (Cytokeratin 1) (K1) (CK 1) (67 kDa cytokeratin) (Hair alpha protei | 1179.603  | 47.36  | 0           |
| 13624315 | YEELQTLAGK                 |                  | keratin complex 2, basic, gene 8 [Mus musculus]                                                     | 1151.5957 | 55.06  | 0           |
| 13385998 | YESSALPAGQLTSLPDYASR       |                  | TNF receptor-associated protein 1 [Mus musculus]                                                    | 2126.0376 | 34.38  | 1.819683539 |
| 33859482 | YEWVDVAEAR                 |                  | eukaryotic translation elongation factor 2 [Mus musculus]                                           | 1138.5178 | 57.98  | 1.530179238 |
| 22094075 | YFPTQALNFAFK               |                  | solute carrier family 25, member 5 [Mus musculus]                                                   | 1446.7463 | 57.02  | 1.698976432 |
| 23621467 | YFQFQEEGK                  |                  | PREDICTED: actin related protein 2/3 complex, subunit 2 [Mus musculus]                              | 1175.5414 | 31.65  | 0           |
| 46593021 | YFYDQCPAVAGYPIEQLPDYNR     |                  | ubiquinol-cytochrome c reductase core protein 1 [Mus musculus]                                      | 2679.2329 | 37.66  | 1.645502567 |
| 34328204 | YGEAGDGPWGPPHR             |                  | valyl-tRNA synthetase 2 [Mus musculus]                                                              | 1609.7297 | 31.34  | 1.025693973 |
| 63746482 | YGGDEIPFSPYR               |                  | PREDICTED: filamin, alpha [Mus musculus]                                                            | 1400.6586 | 43.91  | 0.715162974 |
| 63540743 | YGGPQHIVGSPFK              |                  | PREDICTED: filamin C, gamma [Mus musculus]                                                          | 1386.6946 | 22.93  | 0           |
| 63746482 | YGGPYHIGGSPFK              |                  | PREDICTED: filamin, alpha [Mus musculus]                                                            | 1379.6807 | 62.02  | 0.831545462 |
| 21312260 | YGLAAAVFTR                 |                  | aldehyde dehydrogenase 1 family, member B1 [Mus musculus]                                           | 1068.5885 | 37.55  | 1.822289303 |
| 6755817  | YGVNPGPIVGTR               |                  | thymopoietin [Mus musculus]                                                                         | 1330.7139 | 32.37  | 1.567875829 |
| 6680606  | YGVLSQIQSVISGFEAQLSDVR     |                  | keratin complex 1, acidic, gene 19 [Mus musculus]                                                   | 2524.3059 | 116.21 | 1.760864094 |
| 6679687  | YGVSGYPTLK                 |                  | glucose regulated protein [Mus musculus]                                                            | 1084.5693 | 45.32  | 0.963363122 |
| 31981246 | YGYTHLSAGELLR              |                  | UMP-CMP kinase [Mus musculus]                                                                       | 1479.7637 | 61.95  | 1.558262915 |
| 40556608 | YHTSQSGDEMSTLSEYVSR        |                  | heat shock protein 1, beta [Mus musculus]                                                           | 2176.949  | 94.97  | 1.488317992 |
| 34996495 | YHVPVVVPEGSTSDTQEQAILR     |                  | ribophorin II [Mus musculus]                                                                        | 2524.3013 | 63.9   | 1.283284696 |
| 63746482 | YIPVQGGPVGNVNVTYGGDHIPK    |                  | PREDICTED: filamin, alpha [Mus musculus]                                                            | 2338.2273 | 103.12 | 0.937167041 |
| 38080000 | YIQELWR                    |                  | PREDICTED: similar to ribosomal protein L15 [Mus musculus]                                          | 1007.5432 | 21.08  | 1.414164528 |
| 51770896 | YITPDQLADLYK               |                  | PREDICTED: similar to Alpha enolase (2-phospho-D-glycerate hydro-lyase) (Non-neural enolase) (NNE)  | 1439.7252 | 69.33  | 1.201400225 |
| 21704144 | YLDEDTYHLQPSGR             |                  | methionine adenosyltransferase II, alpha [Mus musculus]                                             | 1806.871  | 46.33  | 3.187320148 |
| 6679601  | YLECSALTQR                 |                  | RAS-related C3 botulinum substrate 2 [Mus musculus]                                                 | 1183.5823 | 22.69  | 1.096221422 |
| 63530525 | YLELLGYR                   |                  | PREDICTED: SEC31-like 1 [Mus musculus]                                                              | 1026.5623 | 28.26  | 4.06512741  |
| 6678449  | YLGTPPEPDIVGLDSGHIR        |                  | thiosulfate sulfurtransferase, mitochondrial [Mus musculus]                                         | 2067.0432 | 45.47  | 0           |
| 6678449  | YLGTPPEPDIVGLDSGHIR        | Deamidation (NQ) | thiosulfate sulfurtransferase, mitochondrial [Mus musculus]                                         | 2068.0537 | 70.77  | 0           |
| 33468931 | YLIATSEQPIAALHR            |                  | seryl-aminoacyl-tRNA synthetase 1 [Mus musculus]                                                    | 1682.926  | 29.33  | 0           |
| 31560645 | YLLSQSSPAPLTAEEELR         |                  | twinfilin [Mus musculus]                                                                            | 2075.0618 | 28.48  | 1.345963815 |
| 6753254  | YLNQDYETLR                 |                  | calpain 2 [Mus musculus]                                                                            | 1314.6547 | 26.14  | 1.108421967 |
| 33859506 | YMCENQATISSK               |                  | albumin 1 [Mus musculus]                                                                            | 1374.6045 | 73.71  | 1.791675543 |
| 63660302 | YMIGVTYGGDNILSPYR          |                  | PREDICTED: filamin B, beta [Mus musculus]                                                           | 2015.9878 | 39.3   | 1.318725552 |
| 6678573  | YNDEPVQIR                  |                  | villin 1 [Mus musculus]                                                                             | 1133.5641 | 30.23  | 2.052843219 |
| 63746482 | YNDQHIPGSPFTAR             |                  | PREDICTED: filamin, alpha [Mus musculus]                                                            | 1602.7734 | 52.85  | 0.610172811 |
| 6753138  | YNPNVLPVQCTGK              |                  | Na+/K+ -ATPase beta 1 subunit [Mus musculus]                                                        | 1432.7177 | 41.02  | 1.664612966 |
| 31981522 | YNQMDSTEDAQEEFGWK          |                  | transmembrane 9 superfamily member 2 [Mus musculus]                                                 | 2077.8777 | 64.95  | 0           |
| 51771420 | YNVLGAETVLTQMR             |                  | PREDICTED: hypothetical protein LOC68693 [Mus musculus]                                             | 1594.8243 | 40.29  | 1.364660806 |
| 31543918 | YPEAPPSVR                  |                  | ubiquitin-conjugating enzyme E2 variant 2 [Mus musculus]                                            | 1015.5297 | 34.39  | 1.090610591 |
| 6671507  | YPIEHGIITNWDDMEK           |                  | actin, alpha 2, smooth muscle, aorta [Mus musculus]                                                 | 1960.9352 | 62.56  | 1.023743369 |
| 6671507  | YPIEHGIITNWDDMEK           | Oxidation (M)    | actin, alpha 2, smooth muscle, aorta [Mus musculus]                                                 | 1976.9232 | 26.59  | 0.62712739  |
| 31981945 | YQAVTATLEEK                |                  | ribosomal protein L13a [Mus musculus]                                                               | 1252.6332 | 37.77  | 0           |
| 7549795  | YQEEGVPVQPR                |                  | tight junction protein 2 [Mus musculus]                                                             | 1299.6384 | 21.37  | 1.743403992 |
| 6755963  | YQVDPDACFSK                |                  | voltage-dependent anion channel 1 [Mus musculus]                                                    | 1343.6003 | 37.07  | 6.283644591 |
| 6679891  | YRVPDVLVADPPTAR            |                  | alpha glucosidase 2 alpha neutral subunit [Mus musculus]                                            | 1668.9009 | 23.96  | 0.607737853 |
| 31982223 | YSEIEPSTEGEVIYR            |                  | laminin, beta 2 [Mus musculus]                                                                      | 1771.8385 | 32.32  | 0           |
| 23956406 | YSGGLPLPPSYVPVMSSELSDR     |                  | UDP glucuronosyltransferase 2 family, polypeptide B34 [Mus musculus]                                | 2363.1899 | 23.28  | 1.765310843 |
| 63474405 | YSMPDNSPETR                |                  | PREDICTED: tensin [Mus musculus]                                                                    | 1296.5612 | 27.38  | 0.893581079 |

|          |                          |                                                                                 |           |       |             |
|----------|--------------------------|---------------------------------------------------------------------------------|-----------|-------|-------------|
| 33469063 | YTINIPEDLKPR             | aconitase 1 [Mus musculus]                                                      | 1458.7938 | 34.92 | 0           |
| 6754016  | YTTPEDATPEPGEDPR         | guanine nucleotide binding protein alpha stimulating isoform b [Mus musculus]   | 1774.785  | 60.91 | 1.186762735 |
| 6680854  | YVDSEGHLYTVPIR           | caveolin, caveolae protein 1 [Mus musculus]                                     | 1648.8414 | 71.86 | 0.951824828 |
| 13386062 | YVEEQPGNLQR              | hypothetical protein LOC68117 [Mus musculus]                                    | 1332.6611 | 32.58 | 1.39726356  |
| 33859482 | YVEPIEDVPCGNIVGLVGDQFLVK | eukaryotic translation elongation factor 2 [Mus musculus]                       | 2702.4089 | 24.09 | 1.344777716 |
| 40254244 | YVQELPLETDGALR           | loss of heterozygosity, 11, chromosomal region 2, gene A homolog [Mus musculus] | 1603.8322 | 47.13 | 2.662466373 |
| 17432429 | YVRPGGGYQPTFSLTQK        | glutathione peroxidase 2 [Mus musculus]                                         | 1898.9796 | 22.38 | 0           |
| 64427157 | YVDSDTVQAHTVR            | PREDICTED: synaptopodin 2 [Mus musculus]                                        | 1589.7894 | 65.53 | 0.872868972 |
| 27754118 | YWEIQPATFR               | asporin [Mus musculus]                                                          | 1310.6581 | 38.39 | 1.173954339 |
| 6678499  | YWQQVIDMNDYQR            | UDP-glucose dehydrogenase [Mus musculus]                                        | 1758.7986 | 25.05 | 6.615958977 |
| 31982290 | YYEPYYAAGPSYGGR          | LIM domain containing preferred translocation partner in lipoma [Mus musculus]  | 1713.7645 | 56.4  | 0.781091909 |
| 23943876 | YYIVGLQVR                | zymogen granule membrane protein 16 [Mus musculus]                              | 1110.6317 | 34.62 | 1.054799485 |
| 6755354  | YYPTEDVPR                | ribosomal protein L6 [Mus musculus]                                             | 1139.5382 | 46.31 | 1.31956668  |
| 63556656 | YYVLGATFYGPPECER         | PREDICTED: RIKEN cDNA A430096B05 gene [Mus musculus]                            | 1864.8677 | 27.93 | 0.416164238 |
| 51873060 | YYVTIIDAPGHR             | eukaryotic translation elongation factor 1 alpha 1 [Mus musculus]               | 1404.7349 | 41.83 | 1.099238234 |

## Mouse Pair 2

| GI #     | Sequence                             | Modifications      | Protein Name                                                                                               | M/z       | Highest Mascot score | Average Ratio (15N:14N), non-Log-transformed |
|----------|--------------------------------------|--------------------|------------------------------------------------------------------------------------------------------------|-----------|----------------------|----------------------------------------------|
| 7657429  | AAAITDLESLEGR                        |                    | osteoblast specific factor 2 (fascin I-like) [Mus musculus]                                                | 1416.7697 | 65.91                | 1.112258157                                  |
| 33859506 | AADKDTCFSTEGPNLVTR                   |                    | albumin 1 [Mus musculus]                                                                                   | 1924.9158 | 98.29                | 3.294522749                                  |
| 31981925 | AAFDDAIAELDTLSEESYK                  |                    | tyrosine 3-monooxygenase/tryptophan 5-monooxygenase activation protein, epsilon polypeptide [Mus musculus] | 2087.9912 | 43.86                | 1.959881332                                  |
| 6753036  | AAFQLGSPWR                           |                    | aldehyde dehydrogenase 2, mitochondrial [Mus musculus]                                                     | 1132.5909 | 24.02                | 2.931261288                                  |
| 6680606  | AALEGTLAETEAR                        |                    | keratin complex 1, acidic, gene 19 [Mus musculus]                                                          | 1331.6879 | 59.41                | 1.639573032                                  |
| 13385006 | AANNGALPPDLSYIVR                     |                    | cytochrome c-1 [Mus musculus]                                                                              | 1670.8679 | 42.75                | 0.86753387                                   |
| 27754065 | AAPFTLEYR                            |                    | pyrophosphatase [Mus musculus]                                                                             | 1067.5526 | 28.15                | 2.286688337                                  |
| 6677995  | AAQSPQQHSSGDPTEEEESPV                |                    | solute carrier family 16, member 1 [Mus musculus]                                                          | 2080.9155 | 118.79               | 1.270836103                                  |
| 63474405 | AASDGQYENQSPPEATSPR                  |                    | PREDICTED: tensin [Mus musculus]                                                                           | 1907.8444 | 71.07                | 0.285619877                                  |
| 7304889  | AASGFNATEDAQLR                       |                    | annexin A4 [Mus musculus]                                                                                  | 1551.7499 | 56.02                | 1.513946375                                  |
| 6755809  | AATAPLLEAVDNLSEAFASNPFEFSSVPAQISPEGR |                    | talin 1 [Mus musculus]                                                                                     | 3456.7322 | 67.06                |                                              |
| 31543051 | AAVENLPTFLVELSR                      |                    | karyopherin (importin) beta 1 [Mus musculus]                                                               | 1658.9133 | 40.22                | 2.28274311                                   |
| 7305027  | AAVPSGASTGIYEALRLR                   |                    | enolase 2, gamma neuronal [Mus musculus]                                                                   | 1804.9502 | 86.15                | 0.964245036                                  |
| 51770896 | AAVPSGASTGIYEALRLR                   |                    | PREDICTED: similar to Alpha enolase (2-phospho-D-glycerate hydro-lyase) (Non-neural enolase) (NNE)         | 1804.9502 | 86.15                | 0.964245036                                  |
| 50355692 | AAEYAEALGDAR                         |                    | lamin A isoform A [Mus musculus]                                                                           | 1165.568  | 32.21                | 0.624811951                                  |
| 22094075 | AAYFGIYDTAK                          |                    | solute carrier family 25, member 5 [Mus musculus]                                                          | 1219.6029 | 48.61                | 1.049932819                                  |
| 13937391 | ACGDSTLTQITAGLDPVGR                  |                    | guanine nucleotide-binding protein, beta-2 subunit [Mus musculus]                                          | 1874.9291 | 20.33                | 0                                            |
| 63476037 | ACNLEVILGFDGSR                       |                    | PREDICTED: procollagen, type VI, alpha 3 [Mus musculus]                                                    | 1493.7495 | 28.18                | 0                                            |
| 6671539  | ADDGRPFQVIK                          |                    | aldolase 1, A isoform [Mus musculus]                                                                       | 1342.7174 | 40.76                | 1.125455481                                  |
| 34328489 | ADFDNTVAIHPTSSSEELVTLR               |                    | glutathione reductase 1 [Mus musculus]                                                                     | 2315.1392 | 38.86                | 0                                            |
| 6753266  | ADGLAILGVLMK                         |                    | carbonic anhydrase 1 [Mus musculus]                                                                        | 1200.7012 | 88.68                | 0                                            |
| 6754084  | ADIVENQVMDTR                         |                    | glutathione S-transferase, mu 1 [Mus musculus]                                                             | 1390.6703 | 35.64                | 0                                            |
| 33859811 | ADMVIEAVFEDLGVK                      |                    | hydroxyacyl-Coenzyme A dehydrogenase/3-ketoacyl-Coenzyme A thiolase/enoyl-Coenzyme A hydratase (tri        | 1635.827  | 91.26                | 1.076097213                                  |
| 6996913  | AEDGSVIDYELIDQDAR                    |                    | annexin A2 [Mus musculus]                                                                                  | 1908.8857 | 76.5                 | 1.976660554                                  |
| 63746482 | AFTVETR                              |                    | PREDICTED: filamin, alpha [Mus musculus]                                                                   | 952.4718  | 39.77                | 0                                            |
| 31981562 | AEGSDVANAVLDGADCIMLSGETAK            | Deamidation (NQ)   | pyruvate kinase 3 [Mus musculus]                                                                           | 2438.1274 | 93.55                | 0                                            |
| 63746482 | AEISFEDR                             |                    | PREDICTED: filamin, alpha [Mus musculus]                                                                   | 966.4476  | 21.99                | 0                                            |
| 6678573  | AELGNSGDWVSIQIADDEVMSPK              |                    | villin 1 [Mus musculus]                                                                                    | 2133.99   | 80.25                | 1.474480827                                  |
| 6678573  | AELGNSGDWVSIQIADDEVMSPK              | Deamidation (NQ)   | villin 1 [Mus musculus]                                                                                    | 2134.9949 | 69.26                | 1.033154964                                  |
| 6755372  | AELNEFLTR                            |                    | ribosomal protein S3 [Mus musculus]                                                                        | 1092.5696 | 22.67                | 1.19316314                                   |
| 13386054 | AENFFILR                             |                    | actin related protein 2/3 complex, subunit 4 [Mus musculus]                                                | 1009.5424 | 22.89                | 1.349512292                                  |
| 6678483  | AENYDISPADR                          |                    | ubiquitin-activating enzyme E1, Chr X [Mus musculus]                                                       | 1250.566  | 39.19                | 1.563495984                                  |
| 13626040 | AEVGQEGEAGQFDGEK                     |                    | A kinase (PRKA) anchor protein (gravin) 12 [Mus musculus]                                                  | 1650.74   | 56.79                | 0                                            |
| 63746482 | AEVGVPAEFGIWR                        |                    | PREDICTED: filamin, alpha [Mus musculus]                                                                   | 1531.7869 | 42.3                 | 0.288923965                                  |
| 46559834 | AEVSTIHLQSPGR                        |                    | desmuslin isoform M [Mus musculus]                                                                         | 1394.7445 | 32.5                 | 0                                            |
| 6753322  | AFADAMEVIPSTLAENAGLNPISTVTELR        |                    | chaperonin subunit 4 (delta) [Mus musculus]                                                                | 3030.5381 | 58.12                | 1.644567751                                  |
| 63746482 | AFGPGLQGGNAGSPAR                     |                    | PREDICTED: filamin, alpha [Mus musculus]                                                                   | 1456.7435 | 100.58               | 0.265706355                                  |
| 7710086  | AFLTLAEDILR                          |                    | RAB10, member RAS oncogene family [Mus musculus]                                                           | 1261.7209 | 48.51                | 1.393144743                                  |
| 6678892  | AFQVWSDVTPLR                         | Deamidation (NQ)   | matrix metalloproteinase 12 [Mus musculus]                                                                 | 1419.7052 | 19.18                | 0                                            |
| 6755901  | AFVHWYVYVGEEMEEGFSEAR                |                    | tubulin, alpha 1 [Mus musculus]                                                                            | 2330.0391 | 27.28                | 1.568922979                                  |
| 34740335 | AFVHWYVYVGEEMEEGFSEAR                |                    | tubulin, alpha 2 [Mus musculus]                                                                            | 2330.0391 | 27.28                | 1.568922979                                  |
| 6678467  | AFVHWYVYVGEEMEEGFSEAR                |                    | tubulin, alpha 4 [Mus musculus]                                                                            | 2330.0391 | 27.28                | 1.568922979                                  |
| 6678469  | AFVHWYVYVGEEMEEGFSEAR                |                    | tubulin, alpha 6 [Mus musculus]                                                                            | 2330.0391 | 27.28                | 1.568922979                                  |
| 31982186 | AGAGSATLSMAYAGAR                     |                    | malate dehydrogenase 2, NAD (mitochondrial) [Mus musculus]                                                 | 1454.7133 | 61.43                | 1.252738723                                  |
| 6671507  | AGFAGDDAPR                           |                    | actin, alpha 2, smooth muscle, aorta [Mus musculus]                                                        | 976.4477  | 54.55                | 0.403319735                                  |
| 6671509  | AGFAGDDAPR                           |                    | actin, beta, cytoplasmic [Mus musculus]                                                                    | 976.4477  | 54.55                | 0.403319735                                  |
| 31982275 | AGGIETIANEYSR                        |                    | heat shock protein 4 [Mus musculus]                                                                        | 1495.7202 | 25.93                | 0.806970103                                  |
| 33859811 | AGLEQGSADAGYLAESQK                   |                    | hydroxyacyl-Coenzyme A dehydrogenase/3-ketoacyl-Coenzyme A thiolase/enoyl-Coenzyme A hydratase (tri        | 1723.8177 | 105.87               | 0.605724708                                  |
| 8394269  | AGLMFPNMEAYAVSPAR                    |                    | ST6 (alpha-N-acetylneuraminyl-2,3-beta-galactosyl-1,3)-N-acetylgalactosaminide alpha-2,6-sialyltra         | 1824.8827 | 30.92                | 1.390177193                                  |
| 20799907 | AGLQFPVGR                            |                    | histone 2, H2aa1 [Mus musculus]                                                                            | 944.5343  | 46.58                | 1.339463159                                  |
| 6677775  | AGNLGGGVVTIER                        |                    | ribosomal protein L22 [Mus musculus]                                                                       | 1242.6847 | 25.06                | 3.910271303                                  |
| 63746482 | AGNNMLLVGVHGPR                       | 2 Deamidation (NQ) | PREDICTED: filamin, alpha [Mus musculus]                                                                   | 1436.7406 | 24.22                | 0                                            |
| 31982223 | AGNSLAASTAETAGSAQSR                  |                    | laminin, beta 2 [Mus musculus]                                                                             | 1878.8832 | 53.61                | 0                                            |
| 41322904 | AGTLSITEFADMLSGNAGGFR                |                    | plectin 1 isoform 1 [Mus musculus]                                                                         | 2115.0217 | 81.51                | 1.108206952                                  |



|          |                               |                    |                                                                                                     |           |       |             |
|----------|-------------------------------|--------------------|-----------------------------------------------------------------------------------------------------|-----------|-------|-------------|
| 59709449 | AGTQIENIEEDFR                 |                    | actinin alpha 2 [Mus musculus]                                                                      | 1521.7183 | 40.13 | 0.840440107 |
| 7304855  | AGTQIENIEEDFR                 |                    | actinin alpha 3 [Mus musculus]                                                                      | 1521.7183 | 40.13 | 0.840440107 |
| 59709449 | AGTQIENIEEDFRNGLK             | Deamidation (NQ)   | actinin alpha 2 [Mus musculus]                                                                      | 1934.9807 | 25.18 | 1.647057329 |
| 7304855  | AGTQIENIEEDFRNGLK             | Deamidation (NQ)   | actinin alpha 3 [Mus musculus]                                                                      | 1934.9807 | 25.18 | 1.647057329 |
| 41322904 | AGVGAPVTQVTLQSTQR             |                    | plectin 1 isoform 1 [Mus musculus]                                                                  | 1712.938  | 30.61 | 0.756211992 |
| 51770896 | AGYTDQVIVIGMDVAASEFYR         |                    | PREDICTED: similar to Alpha enolase (2-phospho-D-glycerate hydro-lyase) (Non-neural enolase) (NNE)  | 2192.0371 | 27.92 | 0.908296138 |
| 31980648 | AHGGYSVFAGVGER                |                    | ATP synthase, H+ transporting mitochondrial F1 complex, beta subunit [Mus musculus]                 | 1406.6902 | 70.26 | 0           |
| 31980648 | AIAELGIYPAVDPLDSTSR           |                    | ATP synthase, H+ transporting mitochondrial F1 complex, beta subunit [Mus musculus]                 | 1988.0399 | 123   | 1.037630287 |
| 31542413 | AIFLADGNVFTTGFSSR             |                    | coronin, actin binding protein 1C [Mus musculus]                                                    | 1715.8767 | 42.03 | 0           |
| 33859488 | AILVDLEPGTMDSVR               |                    | tubulin, beta 2 [Mus musculus]                                                                      | 1615.8481 | 76    | 1.162005828 |
| 12963615 | AILVDLEPGTMDSVR               |                    | tubulin, beta 3 [Mus musculus]                                                                      | 1615.8481 | 76    | 1.162005828 |
| 7106439  | AILVDLEPGTMDSVR               |                    | tubulin, beta 5 [Mus musculus]                                                                      | 1615.8481 | 76    | 1.162005828 |
| 6755198  | AINQGGLTSVAVR                 |                    | proteasome (prosome, macropain) subunit, alpha type 6 [Mus musculus]                                | 1285.7301 | 21.52 | 1.407512259 |
| 31543942 | AIPDLTAPVAAVQAASVNLVR         |                    | vinculin [Mus musculus]                                                                             | 2076.1826 | 49.33 | 0.48442928  |
| 6753864  | AIVAGDQNVVEYK                 |                    | four and a half LIM domains 1 [Mus musculus]                                                        | 1306.6667 | 78.44 | 0.517281142 |
| 31560560 | AIVAIENPADVSVISSR             |                    | laminin receptor 1 (ribosomal protein SA) [Mus musculus]                                            | 1740.9497 | 75.59 | 1.319612729 |
| 31981722 | AKFEELNMDLFR                  |                    | heat shock 70kD protein 5 (glucose-regulated protein) [Mus musculus]                                | 1512.7592 | 34.99 | 1.473101784 |
| 31981722 | AKFEELNMDLFR                  | Deamidation (NQ)   | heat shock 70kD protein 5 (glucose-regulated protein) [Mus musculus]                                | 1513.7566 | 20.13 | 0           |
| 34328365 | ALAAAGYDVEK                   |                    | histone 1, H1d [Mus musculus]                                                                       | 1107.5691 | 83.95 | 1.241050121 |
| 13430890 | ALAAAGYDVEK                   |                    | histone 1, H1e [Mus musculus]                                                                       | 1107.5691 | 83.95 | 1.241050121 |
| 21426893 | ALAAGGYDVEK                   |                    | histone 1, H1b [Mus musculus]                                                                       | 1093.5433 | 63.59 | 1.308414666 |
| 33598964 | ALELDPNLYR                    |                    | myosin heavy chain 10, non-muscle [Mus musculus]                                                    | 1203.6376 | 46.68 | 0.151195386 |
| 7305295  | ALELDPNLYR                    |                    | myosin, heavy polypeptide 11, smooth muscle [Mus musculus]                                          | 1203.6376 | 46.68 | 0.151195386 |
| 20137006 | ALELDSNLYR                    |                    | myosin, heavy polypeptide 9, non-muscle [Mus musculus]                                              | 1193.6151 | 38.75 | 1.47573805  |
| 6680606  | ALEQANGELEVK                  |                    | keratin complex 1, acidic, gene 19 [Mus musculus]                                                   | 1300.6742 | 74.6  | 1.534607837 |
| 6679687  | ALEQLQEYFDGNLK                |                    | glucose regulated protein [Mus musculus]                                                            | 1814.879  | 81.54 | 1.40705778  |
| 23956176 | ALEQNPDDAQYYCQR               |                    | SGT1, suppressor of G2 allele of SKP1 [Mus musculus]                                                | 1813.8168 | 25.49 | 0           |
| 7305295  | ALETQMEEMK                    |                    | myosin, heavy polypeptide 11, smooth muscle [Mus musculus]                                          | 1209.5496 | 52.04 | 0.237285892 |
| 63746482 | ALGALVDSCAPGLCPDWSDWASKPVNNAR |                    | PREDICTED: filamin, alpha [Mus musculus]                                                            | 3128.4685 | 67.98 | 0           |
| 6678573  | ALGMTPAAFSALPR                |                    | villin 1 [Mus musculus]                                                                             | 1402.7396 | 22.34 | 2.888255229 |
| 33620739 | ALGQNPTNAEVLK                 |                    | myosin, light polypeptide 6, alkali, smooth muscle and non-muscle [Mus musculus]                    | 1354.7152 | 40.04 | 0           |
| 6753322  | ALIAGGGAPEIELALR              |                    | chaperonin subunit 4 (delta) [Mus musculus]                                                         | 1550.8914 | 40.48 | 1.613896709 |
| 29244556 | ALILVGGYGTR                   |                    | GDP-mannose pyrophosphorylase B [Mus musculus]                                                      | 1119.6552 | 21.82 | 1.850978668 |
| 63489754 | ALINADELANDVAGAEALLDR         |                    | PREDICTED: similar to Spectrin alpha chain, brain (Spectrin, non-erythroid alpha chain) (Alpha-II s | 2154.1023 | 125.2 | 1.227497307 |
| 6671666  | ALLATASQCQPPAGNK              |                    | CAP, adenylate cyclase-associated protein 1 [Mus musculus]                                          | 1600.8116 | 59.71 | 1.448359177 |
| 46559834 | ALLEGESNPEILIWTEINIENVPQEPFR  |                    | desmulin isoform M [Mus musculus]                                                                   | 2990.5186 | 37.91 | 0           |
| 33859482 | ALLELQLEPEELYQTFQR            |                    | eukaryotic translation elongation factor 2 [Mus musculus]                                           | 2220.1577 | 86.18 | 1.214100638 |
| 40556608 | ALLFIPR                       |                    | heat shock protein 1, beta [Mus musculus]                                                           | 829.5231  | 33.37 | 1.654545423 |
| 31981679 | ALMLQGVDLLADAVAVTMGPK         |                    | heat shock protein 1 (chaperonin) [Mus musculus]                                                    | 2113.1436 | 62.01 | 0           |
| 63476037 | ALNLYGALDYALR                 |                    | PREDICTED: procollagen, type VI, alpha 3 [Mus musculus]                                             | 1452.7915 | 64.83 | 0.270254416 |
| 63506192 | ALPFWNNEIVPQIK                |                    | PREDICTED: similar to phosphoglycerate mutase (EC 5.4.2.1) B chain - rat [Mus musculus]             | 1683.9053 | 27.09 | 2.017808105 |
| 30578429 | ALPLWLSLQYLGLDGIVER           |                    | hypothetical protein LOC94184 [Mus musculus]                                                        | 2156.2131 | 20.1  | 1.353489055 |
| 31982286 | ALQNAVSTFVNR                  | Deamidation (NQ)   | HGF-regulated tyrosine kinase substrate [Mus musculus]                                              | 1320.6821 | 21.07 | 0           |
| 21704020 | ALSEIAGITLPYDTLDQVR           |                    | NADH dehydrogenase (ubiquinone) Fe-S protein 1 [Mus musculus]                                       | 2075.1025 | 79.13 | 1.010453206 |
| 22165384 | ALTVPELTQQMFDAK               |                    | tubulin, beta, 2 [Mus musculus]                                                                     | 1691.8729 | 57.86 | 1.082451621 |
| 12963615 | ALTVPELTQQMFDAK               |                    | tubulin, beta 3 [Mus musculus]                                                                      | 1691.8729 | 57.86 | 1.082451621 |
| 31981939 | ALTVPELTQQMFDAK               |                    | tubulin, beta 4 [Mus musculus]                                                                      | 1691.8729 | 57.86 | 1.082451621 |
| 27754056 | ALTVPELTQQMFDAK               |                    | tubulin, beta 6 [Mus musculus]                                                                      | 1691.8729 | 57.86 | 1.082451621 |
| 9903607  | ALVDELEWEIAR                  |                    | transmembrane protein 4 [Mus musculus]                                                              | 1443.7524 | 35.26 | 0           |
| 19526818 | ALYSNILGEENTYLWR              |                    | solute carrier family 25 (mitochondrial carrier, phosphate carrier), member 3 [Mus musculus]        | 1941.9736 | 60.17 | 1.350926231 |
| 14389431 | AMADPEVQQIMSDPAMR             |                    | stress-induced phosphoprotein 1 [Mus musculus]                                                      | 1889.8751 | 36.2  | 1.295657309 |
| 21704100 | AMDSDWFAQNYMGR                |                    | hydroxyacyl-Coenzyme A dehydrogenase/3-ketoacyl-Coenzyme A thiolase/enoyl-Coenzyme A hydratase (tri | 1691.7013 | 38.27 | 0.870227973 |
| 21704100 | AMDSDWFAQNYMGR                | Deamidation (NQ)   | hydroxyacyl-Coenzyme A dehydrogenase/3-ketoacyl-Coenzyme A thiolase/enoyl-Coenzyme A hydratase (tri | 1692.6975 | 27.08 | 0           |
| 20874851 | AMGIMNSFVNDIFER               |                    | PREDICTED: similar to histone H2b-616 [Mus musculus]                                                | 1743.8418 | 46    | 0           |
| 20874851 | AMGIMNSFVNDIFER               | Deamidation (NQ)   | PREDICTED: similar to histone H2b-616 [Mus musculus]                                                | 1744.8287 | 84.16 | 0           |
| 20874851 | AMGIMNSFVNDIFER               | Oxidation (M)      | PREDICTED: similar to histone H2b-616 [Mus musculus]                                                | 1759.8228 | 36.13 | 1.076089212 |
| 41054806 | AMGNLQIDFADPQR                |                    | guanine nucleotide binding protein, alpha inhibiting 2 [Mus musculus]                               | 1575.7677 | 22.17 | 1.345444086 |
| 41054806 | AMGNLQIDFADPQRADDAR           | 2 Deamidation (NQ) | guanine nucleotide binding protein, alpha inhibiting 2 [Mus musculus]                               | 2105.9819 | 19.79 | 0           |
| 38372905 | ANINVENAFFTLAR                |                    | cell line NK14 derived transforming oncogene [Mus musculus]                                         | 1579.8282 | 55.14 | 1.55941834  |
| 63746482 | ANLPQSFQVDTSK                 |                    | PREDICTED: filamin, alpha [Mus musculus]                                                            | 1434.7257 | 85.71 | 0.264512121 |

|          |                              |                                                                                                   |           |        |             |
|----------|------------------------------|---------------------------------------------------------------------------------------------------|-----------|--------|-------------|
| 20137006 | ANLQIDQINTDLNLER             | myosin, heavy polypeptide 9, non-muscle [Mus musculus]                                            | 1869.9568 | 59.99  | 1.50167768  |
| 7304881  | ANNNTTYGLAAGLFTK             | aldehyde dehydrogenase family 1, subfamily A1 [Mus musculus]                                      | 1541.7832 | 34.51  | 1.49225543  |
| 19745150 | APDAWDYSQGFVNEEMIR           | diaphorase 1 [Mus musculus]                                                                       | 2127.947  | 32.5   | 1.240947151 |
| 6754750  | APDFVYAPR                    | moesin [Mus musculus]                                                                             | 1182.5948 | 54.75  | 1.452763021 |
| 6678571  | APDFVYAPR                    | villin 2 [Mus musculus]                                                                           | 1182.5948 | 54.75  | 1.452763021 |
| 6681157  | APILIATDVASR                 | DEAD (Asp-Glu-Ala-Asp) box polypeptide 5 [Mus musculus]                                           | 1226.7057 | 38.14  | 2.083272106 |
| 31560689 | APLVLEQGLR                   | 3-hydroxy-3-methylglutaryl-Coenzyme A synthase 2 [Mus musculus]                                   | 1095.6498 | 51.28  | 0.321300528 |
| 33859506 | APQVSTPTLVAAAR               | albumin 1 [Mus musculus]                                                                          | 1439.795  | 63.77  | 2.7328288   |
| 33563250 | APSYGAGELLDFSLADAVNQEFLATR   | desmin [Mus musculus]                                                                             | 2755.3733 | 114.28 | 0.2063851   |
| 7106435  | APTAQVESFR                   | tenascin C [Mus musculus]                                                                         | 1105.5649 | 39.45  | 1.00770626  |
| 6671664  | APVPTGEVYFADSFDR             | calnexin [Mus musculus]                                                                           | 1770.8364 | 68.74  | 0           |
| 41322904 | AQAEAQPPVFNTLR               | plectin 1 isoform 1 [Mus musculus]                                                                | 1572.8146 | 30.69  | 0           |
| 41322904 | AQAEAEAEQELQR                | plectin 1 isoform 1 [Mus musculus]                                                                | 1385.7043 | 32.14  | 1.078395328 |
| 31982520 | AQDTAELFFEDVR                | acetyl-Coenzyme A dehydrogenase, long-chain [Mus musculus]                                        | 1540.7335 | 69.05  | 1.982934665 |
| 51828444 | AQEAAAEEPPPAVTPAASVSALDLGEQR | PREDICTED: proline-rich polypeptide 6 [Mus musculus]                                              | 2775.3782 | 65.85  | 1.178022199 |
| 6754256  | AQFEGIVTDLIK                 | heat shock protein 9A [Mus musculus]                                                              | 1333.7314 | 63.62  | 1.809393747 |
| 29789289 | AQFGQPEILLGTIPGAGGTQR        | enoyl Coenzyme A hydratase, short chain, 1, mitochondrial [Mus musculus]                          | 2111.1301 | 58.44  | 1.875314892 |
| 27229118 | AQFSEVQLLEWQPPFR             | hypothetical protein LOC71664 [Mus musculus]                                                      | 1958.9725 | 23.92  | 0           |
| 6679583  | AQIWDTAGQER                  | RAB11B, member RAS oncogene family [Mus musculus]                                                 | 1274.6185 | 31.76  | 1.622585762 |
| 6754482  | AQMEQLNGVLLHLESELAQTR        | keratin complex 1, acidic, gene 18 [Mus musculus]                                                 | 2380.2241 | 24.15  | 1.433569273 |
| 21536220 | AQSELGADEAAR                 | ATP synthase, H+ transporting, mitochondrial F1 complex, delta subunit precursor [Mus musculus]   | 1375.6521 | 110.78 | 1.013263532 |
| 19526862 | AQSSQDAVSSMNLFDLGGQYLR       | fuse-binding protein-interacting repressor [Mus musculus]                                         | 2387.0999 | 19.51  | 0           |
| 6754556  | ASAPATPLSPTR                 | lamin B1 [Mus musculus]                                                                           | 1168.6357 | 24.18  | 1.174960941 |
| 34328206 | ASEDFVDPWTVR                 | tryptophanyl-tRNA synthetase [Mus musculus]                                                       | 1421.6711 | 33.75  | 0           |
| 6755358  | ASGNYATVISHNPETK             | ribosomal protein L8 [Mus musculus]                                                               | 1688.8252 | 78.05  | 0           |
| 63746482 | ASGPNLNTGVPASLPVEFTIDAK      | PREDICTED: filamin, alpha [Mus musculus]                                                          | 2342.229  | 84.69  | 0           |
| 34328365 | ASGPPVSELTK                  | histone 1, H1d [Mus musculus]                                                                     | 1198.6698 | 31.66  | 0           |
| 23943876 | ASGTSFNVAPLHPNTVLR           | zymogen granule membrane protein 16 [Mus musculus]                                                | 1880.9993 | 36.38  | 3.14960897  |
| 13624315 | ASLEAAIADAEQR                | keratin complex 2, basic, gene 8 [Mus musculus]                                                   | 1344.6794 | 67.98  | 1.312127502 |
| 6679931  | ASLGLNTLADVPDDEVQGR          | UDP-N-acetyl-alpha-D-galactosamine: (N-acetylneuraminy)-galactosyl-N-acetylglucosaminylpolypeptid | 2071.0281 | 60.35  | 0           |
| 31543605 | ASSFVLALEPELESR              | ribophorin I [Mus musculus]                                                                       | 1647.8629 | 51.93  | 1.277140386 |
| 9845283  | ASYVAPLTAQPATYR              | RNA binding motif protein 14 [Mus musculus]                                                       | 1608.8413 | 35.73  | 1.210263232 |
| 7305163  | ATAGDTHLGGEDFDNR             | heat shock protein 1-like [Mus musculus]                                                          | 1675.7479 | 60.3   | 0           |
| 63704924 | ATAGDTHLGGEDFDNR             | PREDICTED: heat shock protein 1B [Mus musculus]                                                   | 1675.7479 | 60.3   | 0           |
| 6754976  | ATAVMPDQGFK                  | peroxiredoxin 1 [Mus musculus]                                                                    | 1164.5696 | 63.03  | 1.380875034 |
| 6755114  | ATDLLLDDSLVSLFGNR            | peroxiredoxin 5 precursor [Mus musculus]                                                          | 1848.9874 | 44.05  | 2.574202111 |
| 6679567  | ATEMVEVGPEDEVGAER            | polymerase I and transcript release factor [Mus musculus]                                         | 1932.8557 | 106.36 | 0.600034241 |
| 6679567  | ATEMVEVGPEDEVGAER            | polymerase I and transcript release factor [Mus musculus]                                         | 1948.8485 | 30.19  | 0           |
| 9845253  | ATENDIYNFFSPLNPMR            | heterogeneous nuclear ribonucleoprotein H2 [Mus musculus]                                         | 2028.9503 | 30.99  | 0.986487774 |
| 10946928 | ATENDIYNFFSPLNPVR            | heterogeneous nuclear ribonucleoprotein H1 [Mus musculus]                                         | 1996.9727 | 78.04  | 1.640791374 |
| 25020120 | ATGDPWLTGDSYLDGSGFAR         | PREDICTED: laminin, alpha 5 [Mus musculus]                                                        | 2085.97   | 26.92  | 0           |
| 55741703 | ATGVLLYDLVSR                 | glutaminyl-tRNA synthetase [Mus musculus]                                                         | 1306.7349 | 25.48  | 0           |
| 7305295  | ATLQAEQLSNELATER             | myosin, heavy polypeptide 11, smooth muscle [Mus musculus]                                        | 1773.9039 | 105.87 | 0.1822314   |
| 6753492  | ATPEPSGTPSSDVTVSR            | coronin, actin binding protein 1A [Mus musculus]                                                  | 1588.7574 | 65.59  | 5.152195039 |
| 21450625 | ATQALVLAPTR                  | eukaryotic translation initiation factor 4A1 [Mus musculus]                                       | 1140.674  | 29.25  | 1.79222132  |
| 6755809  | AVAEQIPLLQGVGR               | talin 1 [Mus musculus]                                                                            | 1492.8856 | 45.92  | 0           |
| 22267442 | AVAQGNLSSADVQAQAK            | ubiquinol cytochrome c reductase core protein 2 [Mus musculus]                                    | 1529.7998 | 49.19  | 0           |
| 6755901  | AVCMLSNTTAAIEAWAR            | tubulin, alpha 1 [Mus musculus]                                                                   | 1807.8944 | 22.44  | 1.123734352 |
| 34740335 | AVCMLSNTTAAIEAWAR            | tubulin, alpha 2 [Mus musculus]                                                                   | 1807.8944 | 22.44  | 1.123734352 |
| 6678467  | AVCMLSNTTAAIEAWAR            | tubulin, alpha 4 [Mus musculus]                                                                   | 1807.8944 | 22.44  | 1.123734352 |
| 6678469  | AVCMLSNTTAAIEAWAR            | tubulin, alpha 6 [Mus musculus]                                                                   | 1807.8944 | 22.44  | 1.123734352 |
| 6680748  | AVDSLVPPIGR                  | ATP synthase, H+ transporting, mitochondrial F1 complex, alpha subunit, isoform 1 [Mus musculus]  | 1026.5929 | 57.15  | 0.921602227 |
| 25020120 | AVEASNAYSSILQAVQAEDAAGQALR   | PREDICTED: laminin, alpha 5 [Mus musculus]                                                        | 2704.345  | 55.04  | 0.301952509 |
| 18079351 | AVFPQNGLVVSSVDVQSEVPDQQR     | major vault protein [Mus musculus]                                                                | 2569.3215 | 67.41  | 1.24540746  |
| 6671507  | AVFPSIVGRPR                  | actin, alpha 2, smooth muscle, aorta [Mus musculus]                                               | 1198.7054 | 27.24  | 0.437800529 |
| 6671509  | AVFPSIVGRPR                  | actin, beta, cytoplasmic [Mus musculus]                                                           | 1198.7054 | 27.24  | 0.437800529 |
| 21450277 | AVFQANQENLPILK               | Na+/K+ -ATPase alpha 1 subunit [Mus musculus]                                                     | 1584.8759 | 57.32  | 1.244677131 |
| 6678467  | AVFVDLEPTVIDEIR              | tubulin, alpha 4 [Mus musculus]                                                                   | 1715.9268 | 51.65  | 1.662333853 |
| 6755901  | AVFVDLEPTVIDEVR              | tubulin, alpha 1 [Mus musculus]                                                                   | 1701.9135 | 116.28 | 0.967612901 |
| 34740335 | AVFVDLEPTVIDEVR              | tubulin, alpha 2 [Mus musculus]                                                                   | 1701.9135 | 116.28 | 0.967612901 |

Oxidation (M)

|          |                           |                    |                                                                                                      |           |        |             |
|----------|---------------------------|--------------------|------------------------------------------------------------------------------------------------------|-----------|--------|-------------|
| 6678469  | AVFVDLEPTVIDEVR           |                    | tubulin, alpha 6 [Mus musculus]                                                                      | 1701.9135 | 116.28 | 0.967612901 |
| 28916673 | AVITSLLDQIPEMFADTR        |                    | SEC24 related gene family, member C [Mus musculus]                                                   | 2020.0338 | 51.16  | 2.105277472 |
| 22165384 | AVLVLDLEPGTMDSVR          |                    | tubulin, beta, 2 [Mus musculus]                                                                      | 1601.8191 | 66.08  | 1.264405525 |
| 31981939 | AVLVLDLEPGTMDSVR          |                    | tubulin, beta 4 [Mus musculus]                                                                       | 1601.8191 | 66.08  | 1.264405525 |
| 16716471 | AVPVSNIAPAAVGR            |                    | hypothetical protein LOC94184 [Mus musculus]                                                         | 1321.7654 | 44.47  | 1.303810106 |
| 6756039  | AVTEQGAELSNEER            |                    | tyrosine 3-monooxygenase/tryptophan 5-monooxygenase activation protein, theta polypeptide [Mus musc] | 1532.7223 | 57.5   | 1.177833896 |
| 7305173  | AVTQSAEITIPVFEAR          |                    | heat shock protein 1 [Mus musculus]                                                                  | 1832.9714 | 63.69  | 0.314210752 |
| 31543605 | AVTSEIAVLQSR              |                    | ribophorin I [Mus musculus]                                                                          | 1273.7073 | 31.38  | 1.138369344 |
| 63746482 | AWGPGLEGGIVGK             |                    | PREDICTED: filamin, alpha [Mus musculus]                                                             | 1240.6641 | 82.41  | 0           |
| 63540743 | AWGPGLETGQVQK             |                    | PREDICTED: filamin C, gamma [Mus musculus]                                                           | 1299.6622 | 28.56  | 0           |
| 6753138  | AYGENIGYSEK               |                    | Na+/K+ -ATPase beta 1 subunit [Mus musculus]                                                         | 1230.5654 | 71.71  | 1.507482101 |
| 63746482 | AYGPGIEPTGNMVK            |                    | PREDICTED: filamin, alpha [Mus musculus]                                                             | 1433.7113 | 44.21  | 0.337809677 |
| 6755901  | AYHEQLSVAEITNACFEPANQMVK  |                    | tubulin, alpha 1 [Mus musculus]                                                                      | 2693.282  | 48.43  | 0.960860302 |
| 34740335 | AYHEQLSVAEITNACFEPANQMVK  |                    | tubulin, alpha 2 [Mus musculus]                                                                      | 2693.282  | 48.43  | 0.960860302 |
| 6678467  | AYHEQLSVAEITNACFEPANQMVK  |                    | tubulin, alpha 4 [Mus musculus]                                                                      | 2693.282  | 48.43  | 0.960860302 |
| 33859482 | AYLPVNESEFGFTADLR         |                    | eukaryotic translation elongation factor 2 [Mus musculus]                                            | 1799.8943 | 51.55  | 1.365482222 |
| 20137008 | AYYNGISLFNNPVPYWEVQPATFR  |                    | biglycan [Mus musculus]                                                                              | 2846.3762 | 46.79  | 1.349264004 |
| 63746482 | CAPGVVGPTEADIDFDIIR       |                    | PREDICTED: filamin, alpha [Mus musculus]                                                             | 1987.9602 | 20.13  | 0           |
| 63746482 | CGQSAAVASPGGSIDSR         |                    | PREDICTED: filamin, alpha [Mus musculus]                                                             | 1562.731  | 90.85  | 0.238089425 |
| 26024211 | CIHQSLIEDNNR              | 2 Deamidation (NQ) | constitutive photomorphogenic protein 1 [Mus musculus]                                               | 1330.5791 | 24.64  | 0           |
| 6753484  | DAEEVISQITIDTIVDMIK       |                    | procollagen, type VI, alpha 1 [Mus musculus]                                                         | 2020.0264 | 82.47  | 0           |
| 6753484  | DAEEVISQITIDTIVDMIK       | Oxidation (M)      | procollagen, type VI, alpha 1 [Mus musculus]                                                         | 2036.0068 | 26.41  | 0           |
| 6754482  | DAETTLTELRL               |                    | keratin complex 1, acidic, gene 18 [Mus musculus]                                                    | 1148.577  | 22.34  | 0.506507333 |
| 21450277 | DAFQNAYLELGGGLGER         |                    | Na+/K+ -ATPase alpha 1 subunit [Mus musculus]                                                        | 1752.8593 | 44.9   | 0.796203942 |
| 63660302 | DAGEGLLAVQITDQEGKPKQR     |                    | PREDICTED: filamin B, beta [Mus musculus]                                                            | 2125.082  | 38.56  | 1.487495552 |
| 6754036  | DAGMQLQGYR                |                    | glutamate oxaloacetate transaminase 2, mitochondrial [Mus musculus]                                  | 1138.5352 | 33.97  | 0           |
| 6754256  | DAGQISGLNLVLR             |                    | heat shock protein 9A [Mus musculus]                                                                 | 1242.6794 | 47     | 0           |
| 31981690 | DAGTIAGLNLVLR             |                    | heat shock protein 8 [Mus musculus]                                                                  | 1199.6765 | 60.89  | 1.122077916 |
| 63664182 | DAGTIAGLNLVLR             |                    | PREDICTED: similar to heat shock protein 8 [Mus musculus]                                            | 1199.6765 | 60.89  | 1.122077916 |
| 31981722 | DAGTIAGLNLVLR             |                    | heat shock 70kD protein 5 (glucose-regulated protein) [Mus musculus]                                 | 1217.6285 | 65.19  | 1.146909918 |
| 31542602 | DANLYISGLPR               |                    | ELAV (embryonic lethal, abnormal vision, Drosophila)-like 1 (Hu antigen R) [Mus musculus]            | 1218.637  | 24.68  | 0.882472189 |
| 41322904 | DAPDGPVSEAEPEYTFEGLR      |                    | plectin 1 isoform 1 [Mus musculus]                                                                   | 2178.9912 | 73.86  | 0.998748298 |
| 21592285 | DAQVQNAQCCLR              |                    | keratin 20 [Mus musculus]                                                                            | 1344.671  | 57.26  | 1.176327632 |
| 30348966 | DASVAEAWLLGQEPYLSSR       |                    | spectrin beta 2 isoform 1 [Mus musculus]                                                             | 2092.0193 | 42.98  | 1.391482722 |
| 7106421  | DASVAEAWLLGQEPYLSSR       |                    | spectrin beta 2 isoform 2 [Mus musculus]                                                             | 2092.0193 | 42.98  | 1.391482722 |
| 6679687  | DASVVGFFR                 |                    | glucose regulated protein [Mus musculus]                                                             | 997.5002  | 59.41  | 1.183794824 |
| 51770896 | DATNVGDEGGFAPNILENK       |                    | PREDICTED: similar to Alpha enolase (2-phospho-D-glycerate hydro-lyase) (Non-neural enolase) (NNE)   | 1960.9368 | 49.51  | 0.958928702 |
| 31542333 | DAVIYPILVEFTR             |                    | hypoxia up-regulated 1 [Mus musculus]                                                                | 1535.854  | 47.51  | 1.252757088 |
| 31981562 | DAVLNAAWEDVDLR            |                    | pyruvate kinase 3 [Mus musculus]                                                                     | 1586.7877 | 114.17 | 1.388842232 |
| 31981562 | DAVLNAAWEDVDLR            | Deamidation (NQ)   | pyruvate kinase 3 [Mus musculus]                                                                     | 1587.7899 | 43.92  | 0           |
| 6755204  | DAYSGGAVNLYHVR            |                    | proteasome (prosome, macropain) subunit, beta type 5 [Mus musculus]                                  | 1521.7313 | 20.9   | 0.409269127 |
| 6679291  | DCVGPVENACANPAAGTVILLENLR |                    | phosphoglycerate kinase 1 [Mus musculus]                                                             | 2668.291  | 42.79  | 1.475034181 |
| 56699423 | DDFLGQVDVPLYPLPTENPR      |                    | neural precursor cell expressed, developmentally down-regulated gene 4 [Mus musculus]                | 2285.1541 | 44.08  | 0           |
| 6680027  | DDGSWEVIEGYR              |                    | glutamate dehydrogenase 1 [Mus musculus]                                                             | 1425.6322 | 33.65  | 0.596284264 |
| 31982122 | DDLIASILSEVTPPTLEELR      |                    | phospholipase C, beta 3 [Mus musculus]                                                               | 2211.1726 | 40.06  | 1.670450802 |
| 6681027  | DDTYQSYSSPSR              |                    | deleted in malignant brain tumors 1 [Mus musculus]                                                   | 1502.65   | 39.29  | 1.298025684 |
| 31981100 | DESSPYAAMLAQDVAQR         |                    | ribosomal protein S14 [Mus musculus]                                                                 | 1922.8925 | 61.97  | 0           |
| 6680047  | DETNYGIPQR                |                    | guanine nucleotide binding protein (G protein), beta polypeptide 2 like 1 [Mus musculus]             | 1192.5673 | 69.9   | 1.506818381 |
| 22203747 | DFDSLALQPSFFDR            |                    | procollagen, type VI, alpha 2 [Mus musculus]                                                         | 1544.7035 | 59.48  | 0           |
| 8393150  | DFEQPLAISR                |                    | carboxyl terminal LIM domain protein 1 [Mus musculus]                                                | 1175.6063 | 26.39  | 0           |
| 6755142  | DFMIQGGDFTR               |                    | peptidylprolyl isomerase B [Mus musculus]                                                            | 1286.5925 | 50.89  | 0.853132194 |
| 14149647 | DFNHINVELSLGK             |                    | ribosomal protein L9 [Mus musculus]                                                                  | 1598.8317 | 64.85  | 0           |
| 24418919 | DFNVGDYIEAVLDR            |                    | brain glycogen phosphorylase [Mus musculus]                                                          | 1625.7791 | 53.68  | 0           |
| 42475998 | DFNVPLSISR                |                    | PDZ and LIM domain 7 [Mus musculus]                                                                  | 1147.6156 | 40.52  | 0.319287102 |
| 31981657 | DFPIANGDR                 |                    | carbonic anhydrase 2 [Mus musculus]                                                                  | 1004.4788 | 31.77  | 1.336435904 |
| 20137006 | DFSALSQLQDQTQELLQEENR     |                    | myosin, heavy polypeptide 9, non-muscle [Mus musculus]                                               | 2493.1746 | 159.91 | 1.72231268  |
| 29126205 | DFSATDLTEFAAR             |                    | acetyl-Coenzyme A acyltransferase 2 (mitochondrial 3-oxoacyl-Coenzyme A thiolase) [Mus musculus]     | 1443.6792 | 24.94  | 1.334964003 |
| 6755714  | DFTDSQLQEGK               |                    | transgelin [Mus musculus]                                                                            | 1267.5864 | 72.66  | 0.360192166 |
| 10181184 | DFTPSGIAGAFR              |                    | ATP synthase, H+ transporting, mitochondrial F0 complex, subunit f, isoform 2 [Mus musculus]         | 1238.6163 | 30.23  | 1.027589282 |
| 6681233  | DGAFFDFPVLRL              |                    | solute carrier family 26 (sulfate transporter), member 2 [Mus musculus]                              | 1283.6453 | 36.54  | 1.340103859 |

|          |                           |                  |                                                                                                     |           |        |             |
|----------|---------------------------|------------------|-----------------------------------------------------------------------------------------------------|-----------|--------|-------------|
| 58037267 | DGELPVEDDIDLSDVELDDLEKDEL |                  | protein disulfide isomerase-associated 6 [Mus musculus]                                             | 2830.3284 | 51.59  | 2.1893621   |
| 33563250 | DGEVVSEATQQQHEVL          |                  | desmin [Mus musculus]                                                                               | 1768.8481 | 100.63 | 0           |
| 22164798 | DGFNPAHVEAGLYGSR          |                  | selenium binding protein 1 [Mus musculus]                                                           | 1689.8038 | 69.49  | 1.087978076 |
| 55742711 | DGMLDDEEFALASHLIEAK       |                  | EH-domain containing 2 [Mus musculus]                                                               | 2104.0022 | 25.21  | 0.916145846 |
| 7709980  | DGPLNMILDDGGDLTNLIHTK     |                  | S-adenosylhomocysteine hydrolase [Mus musculus]                                                     | 2252.1104 | 41.48  | 0           |
| 21450277 | DGPNALTPPTTPEVVK          |                  | Na+/K+ -ATPase alpha 1 subunit [Mus musculus]                                                       | 1819.924  | 36.38  | 1.576544377 |
| 6680047  | DGQAMLWDLNEGK             |                  | guanine nucleotide binding protein (G protein), beta polypeptide 2 like 1 [Mus musculus]            | 1476.8825 | 39.23  | 0           |
| 27229048 | DGQVIGIGAGQQSR            |                  | 5-aminoimidazole-4-carboxamide ribonucleotide formyltransferase/IMP cyclohydrolase [Mus musculus]   | 1385.7159 | 51.33  | 1.146036679 |
| 31982755 | DGQVINETSQHDDLE           |                  | vimentin [Mus musculus]                                                                             | 1836.8029 | 94.02  | 0.717553193 |
| 45597447 | DGVANVSIEDR               |                  | superoxide dismutase 1, soluble [Mus musculus]                                                      | 1174.5669 | 58.67  | 1.079467023 |
| 20806532 | DGVPEGTQLQAHK             |                  | cold shock domain protein A short isoform [Mus musculus]                                            | 1407.7007 | 43.14  | 1.00907926  |
| 27754099 | DGWSLWYAEYR               |                  | eukaryotic translation elongation factor 1 gamma [Mus musculus]                                     | 1445.6578 | 30.92  | 1.445471065 |
| 18079339 | DGYAQLR                   |                  | aconitase 2, mitochondrial [Mus musculus]                                                           | 935.4882  | 42.74  | 1.344313687 |
| 6680117  | DGYMPSQYNSQNWEAR          |                  | glutathione synthetase [Mus musculus]                                                               | 1945.8278 | 23.92  | 1.972613302 |
| 22203747 | DIANSPHELVR               |                  | procollagen, type VI, alpha 2 [Mus musculus]                                                        | 1314.6412 | 44.72  | 0.225619105 |
| 41350312 | DIELVMSQANVSR             |                  | nascent polypeptide-associated complex alpha polypeptide [Mus musculus]                             | 1461.7235 | 21.74  | 0           |
| 40254595 | DIGAIQVHAENGDIIEEQQR      |                  | dihydropyrimidinase-like 2 [Mus musculus]                                                           | 2377.1753 | 94.91  | 0.963663414 |
| 19745150 | DILLRPELEELR              |                  | diaphorase 1 [Mus musculus]                                                                         | 1495.8214 | 21.68  | 0.886736114 |
| 9790073  | DINDNRPTFLQSK             |                  | cadherin 17 [Mus musculus]                                                                          | 1547.7913 | 30.92  | 2.514685498 |
| 18079339 | DINQEVYNFLATAGAK          |                  | aconitase 2, mitochondrial [Mus musculus]                                                           | 1753.8781 | 107.98 | 0.728962952 |
| 24429590 | DINTDFLLVLR               | Deamidation (NQ) | aconitase 2, mitochondrial [Mus musculus]                                                           | 1754.8748 | 22.1   | 0           |
| 6755863  | DISTNYYASQK               |                  | DEAH (Asp-Glu-Ala-His) box polypeptide 9 [Mus musculus]                                             | 1417.8042 | 72.75  | 1.343549323 |
| 23956222 | DITYFIQQLLR               |                  | tumor rejection antigen gp96 [Mus musculus]                                                         | 1289.6025 | 49.47  | 2.614050788 |
| 63476037 | DIVFLVDGSSSLGSPNFNAIR     |                  | ARP3 actin-related protein 3 homolog [Mus musculus]                                                 | 1409.7815 | 54.32  | 1.820499884 |
| 51711847 | DKDTPVSNGREPR             | Deamidation (NQ) | PREDICTED: procollagen, type VI, alpha 3 [Mus musculus]                                             | 2208.1255 | 53.29  | 0           |
| 6754524  | DLADELALVDVMDK            |                  | PREDICTED: hypothetical protein LOC76224 [Mus musculus]                                             | 1471.7295 | 20.94  | 0           |
| 63746482 | DLAEDAPWK                 |                  | lactate dehydrogenase 1, A chain [Mus musculus]                                                     | 1675.8217 | 106.84 | 1.451150328 |
| 63660294 | DLAEDAPWK                 |                  | PREDICTED: filamin, alpha [Mus musculus]                                                            | 1044.4933 | 37.77  | 0           |
| 51711855 | DLAEDAPWK                 |                  | PREDICTED: similar to Filamin B (FLN-B) (Beta-filamin) (Actin-binding like protein) (ABP-280-like p | 1044.4933 | 37.77  | 0           |
| 6671549  | DLAILLGMLDPVEK            |                  | PREDICTED: similar to Filamin C (Gamma-filamin) (Filamin 2) (Protein FLNc) (Actin-binding like prot | 1044.4933 | 37.77  | 0           |
| 30348966 | DLDDFQSWLSR               |                  | peroxiredoxin 6 [Mus musculus]                                                                      | 1526.8538 | 103.62 | 3.525275878 |
| 7106421  | DLDDFQSWLSR               |                  | spectrin beta 2 isoform 1 [Mus musculus]                                                            | 1381.6437 | 33.72  | 1.19357587  |
| 27370092 | DLDKPFLLPVESVYIPGR        |                  | spectrin beta 2 isoform 2 [Mus musculus]                                                            | 1381.6437 | 33.72  | 1.19357587  |
| 6755809  | DLDQASLAAVSQQLAPR         |                  | Tu translation elongation factor, mitochondrial [Mus musculus]                                      | 2145.1477 | 35.48  | 1.296789024 |
| 45598381 | DLDSLHSHVLR               |                  | talin 1 [Mus musculus]                                                                              | 1782.9434 | 57.79  | 0           |
| 10946574 | DLFDPIIEER                |                  | thioredoxin domain containing 5 [Mus musculus]                                                      | 1301.6823 | 40.99  | 0.61696084  |
| 6671762  | DLFDPIIQDR                |                  | creatine kinase, brain [Mus musculus]                                                               | 1246.627  | 61.01  | 0.153823307 |
| 13242328 | DLFEDELVPLFEK             |                  | creatine kinase, muscle [Mus musculus]                                                              | 1231.6345 | 30.76  | 0.882067103 |
| 6679687  | DLFSDGHSEFLK              |                  | NS1-associated protein 1 [Mus musculus]                                                             | 1593.8026 | 54.63  | 0           |
| 6678413  | DLGATWVVLGHSEK            |                  | glucose regulated protein [Mus musculus]                                                            | 1394.6578 | 68.72  | 1.296388794 |
| 20137006 | DLGEELEALKTELEDLDTAAQQELR |                  | triosephosphate isomerase 1 [Mus musculus]                                                          | 1539.8022 | 55.26  | 2.07777465  |
| 7305295  | DLGEELEALKTELEDLDTATQQELR |                  | myosin, heavy polypeptide 9, non-muscle [Mus musculus]                                              | 3017.4839 | 76.2   | 8.404946133 |
| 56119103 | DLGTDSQIFISR              |                  | myosin, heavy polypeptide 11, smooth muscle [Mus musculus]                                          | 3047.4893 | 104.27 | 0.238579413 |
| 38198665 | DLIHDQEEEEEEEGQR          |                  | guanosine diphosphate (GDP) dissociation inhibitor 3 [Mus musculus]                                 | 1351.6913 | 78.86  | 1.374664543 |
| 7657429  | DLITQPGDWTLFAPTNDAFK      |                  | p47 protein [Mus musculus]                                                                          | 2099.8743 | 113.5  | 1.539445521 |
| 21312062 | DLITQPGDWTLFAPTNDAFK      | Deamidation (NQ) | osteoblast specific factor 2 (fasciclin I-like) [Mus musculus]                                      | 2250.105  | 19.98  | 1.334297852 |
| 30348966 | DLMLWMEDVIR               |                  | osteoblast specific factor 2 (fasciclin I-like) [Mus musculus]                                      | 2251.1091 | 28.81  | 0.953256598 |
| 7106421  | DLMLWMEDVIR               |                  | transmembrane trafficking protein [Mus musculus]                                                    | 2093.0408 | 31.85  | 0           |
| 63489759 | DLMSWINGIR                |                  | spectrin beta 2 isoform 1 [Mus musculus]                                                            | 1420.703  | 32.33  | 1.343728609 |
| 6681233  | DLPEEAFGFPSELPLETQR       |                  | spectrin beta 2 isoform 2 [Mus musculus]                                                            | 1420.703  | 32.33  | 1.343728609 |
| 47578123 | DLQLVLPDYFFER             |                  | PREDICTED: spectrin alpha 2 [Mus musculus]                                                          | 1204.6155 | 33.78  | 1.363371292 |
| 6671622  | DLQMVNLSR                 |                  | solute carrier family 26 (sulfate transporter), member 2 [Mus musculus]                             | 2175.0581 | 25.14  | 1.147939624 |
| 6678726  | DLSSHQLNEFLAQVLQK         |                  | potassium channel tetramerisation domain containing 12 [Mus musculus]                               | 1604.835  | 42.03  | 0.917079157 |
| 18266680 | DLTAVSNAGVDNFGLLLR        |                  | B-cell receptor-associated protein 37 [Mus musculus]                                                | 1188.6304 | 27.84  | 0           |
| 6671507  | DLTDYLMK                  |                  | leukotriene A4 hydrolase [Mus musculus]                                                             | 1970.0295 | 29.24  | 1.358364358 |
| 6671509  | DLTDYLMK                  |                  | 3-oxoacid CoA transferase 1 [Mus musculus]                                                          | 2159.1511 | 46.39  | 0.870513543 |
| 30425250 | DLTDYLMK                  |                  | actin, alpha 2, smooth muscle, aorta [Mus musculus]                                                 | 998.4838  | 58.85  | 0.449905466 |
| 63652452 | DLTDYLMK                  |                  | actin, beta, cytoplasmic [Mus musculus]                                                             | 998.4838  | 58.85  | 0.449905466 |
|          |                           |                  | hypothetical protein LOC238880 [Mus musculus]                                                       | 998.4838  | 58.85  | 0.449905466 |
|          |                           |                  | PREDICTED: similar to cytoplasmic beta-actin [Mus musculus]                                         | 998.4838  | 58.85  | 0.449905466 |

|          |                         |                  |                                                                                                     |           |        |             |
|----------|-------------------------|------------------|-----------------------------------------------------------------------------------------------------|-----------|--------|-------------|
| 58037465 | DLTTAGAVTQCYR           |                  | Ribosomal protein L18A [Mus musculus]                                                               | 1398.6752 | 50.12  | 1.375641175 |
| 34328286 | DLVPDLSNFYAQYK          |                  | succinate dehydrogenase lp subunit [Mus musculus]                                                   | 1672.804  | 39.08  | 0           |
| 29293809 | DLVSSLTSGLLTIGDR        |                  | ATP citrate lyase [Mus musculus]                                                                    | 1646.9005 | 72.95  | 2.118237229 |
| 6671507  | DLYANNVLSGGTTMYPGIADR   |                  | actin, alpha 2, smooth muscle, aorta [Mus musculus]                                                 | 2228.104  | 159.75 | 0.123780892 |
| 6671507  | DLYANNVLSGGTTMYPGIADR   | Deamidation (NQ) | actin, alpha 2, smooth muscle, aorta [Mus musculus]                                                 | 2229.0688 | 132.99 | 0           |
| 6671507  | DLYANNVLSGGTTMYPGIADR   | Oxidation (M)    | actin, alpha 2, smooth muscle, aorta [Mus musculus]                                                 | 2244.0664 | 38.41  | 0.148080982 |
| 6671509  | DLYANTVLSGGTTMYPGIADR   |                  | actin, beta, cytoplasmic [Mus musculus]                                                             | 2215.093  | 109.19 | 1.252331631 |
| 63652452 | DLYANTVLSGGTTMYPGIADR   |                  | PREDICTED: similar to cytoplasmic beta-actin [Mus musculus]                                         | 2215.093  | 109.19 | 1.252331631 |
| 6755626  | DMLYQVLAEEPSVR          |                  | sepiapterin reductase [Mus musculus]                                                                | 1720.8567 | 44.06  | 1.173932583 |
| 21450277 | DMTSEELDDLIR            |                  | Na+/K+ -ATPase alpha 1 subunit [Mus musculus]                                                       | 1436.6638 | 40.25  | 0.767235688 |
| 8567336  | DMVTQASPYLFEATGK        | Deamidation (NQ) | chloride channel calcium activated 3 [Mus musculus]                                                 | 1758.8387 | 34.96  | 0           |
| 8567336  | DNCVFPDPHQNEK           |                  | chloride channel calcium activated 3 [Mus musculus]                                                 | 1641.7424 | 43.36  | 1.081256137 |
| 6681219  | DNFTAPEGTNGVEER         |                  | dihydropyrimidinase-like 3 [Mus musculus]                                                           | 1748.8213 | 44.99  | 0.912987591 |
| 40254595 | DNFTLIPEGTNGTEER        |                  | dihydropyrimidinase-like 2 [Mus musculus]                                                           | 1792.8507 | 47.43  | 1.0490122   |
| 63746482 | DNGNGTYSYSCYVPR         |                  | PREDICTED: filamin, alpha [Mus musculus]                                                            | 1532.6433 | 72.05  | 0.300588493 |
| 31981722 | DNHLLGTDFLTGIPPAPR      |                  | heat shock 70kD protein 5 (glucose-regulated protein) [Mus musculus]                                | 1934.0085 | 74.51  | 0.856483874 |
| 21361209 | DNIQGITKPAIR            |                  | germinal histone H4 [Mus musculus]                                                                  | 1325.762  | 72.23  | 1.253632151 |
| 33563250 | DNLIDDLQR               |                  | desmin [Mus musculus]                                                                               | 1101.5516 | 65.36  | 0.203705203 |
| 29789080 | DNNQFASASLDR            |                  | coatamer protein complex, subunit beta 2 (beta prime) [Mus musculus]                                | 1337.6095 | 48.81  | 1.125786985 |
| 6753304  | DNQSGSLLFIGR            |                  | serine (or cysteine) proteinase inhibitor, clade H, member 1 [Mus musculus]                         | 1306.6774 | 71.38  | 1.519550062 |
| 28916693 | DPDQTDGPGGLGYLSSHIANVER |                  | gelsolin [Mus musculus]                                                                             | 2341.1101 | 32.13  | 1.737357937 |
| 31543942 | DPNASPGDAGEQAIR         |                  | vinculin [Mus musculus]                                                                             | 1497.6993 | 83.7   | 0.523066766 |
| 6755809  | DPVQLNLLYVQAR           |                  | talin 1 [Mus musculus]                                                                              | 1528.8474 | 40.75  | 0.112955066 |
| 6680572  | DQDNMQUALNLR            |                  | kinesin family member 5B [Mus musculus]                                                             | 1333.5896 | 29.2   | 1.779060322 |
| 31980648 | DQEGQDVLLFDNIFR         |                  | ATP synthase, H+ transporting mitochondrial F1 complex, beta subunit [Mus musculus]                 | 1921.9786 | 75.05  | 1.059600542 |
| 33620739 | DQGTIEDYVEGLR           |                  | myosin, light polypeptide 6, alkali, smooth muscle and non-muscle [Mus musculus]                    | 1544.6899 | 47.83  | 0.627203772 |
| 8392847  | DQLQTFSEEHVLLTEAPLNPR   |                  | ARP1 actin-related protein 1 homolog A [Mus musculus]                                               | 2534.2947 | 25.99  | 0.970153601 |
| 6754254  | DQVANSAFVER             |                  | heat shock protein 1, alpha [Mus musculus]                                                          | 1235.6051 | 79.97  | 2.323833034 |
| 63476037 | DSFQEVLR                |                  | PREDICTED: procollagen, type VI, alpha 3 [Mus musculus]                                             | 993.4935  | 41.05  | 0.236272138 |
| 21313138 | DSGNQPPAMVPR            |                  | glutathione S-transferase class kappa [Mus musculus]                                                | 1268.6167 | 21.78  | 3.495428291 |
| 6679058  | DSGQFTDFLPEQR           |                  | nidogen 2 [Mus musculus]                                                                            | 1668.7687 | 49.61  | 0           |
| 33859811 | DSIFSNLIGQLDYK          |                  | hydroxyacyl-Coenzyme A dehydrogenase/3-ketoacyl-Coenzyme A thiolase/enoyl-Coenzyme A hydratase (tri | 1612.8273 | 80.28  | 1.520677099 |
| 6753266  | DSISLSPEQLAQLR          |                  | carbonic anhydrase 1 [Mus musculus]                                                                 | 1556.8364 | 84.86  | 0.239717196 |
| 6755040  | DSLLQDGEFTMDLR          |                  | profilin 1 [Mus musculus]                                                                           | 1639.7683 | 85.14  | 1.639236028 |
| 6678682  | DSNNLCLHFNPR            |                  | lectin, galactose binding, soluble 1 [Mus musculus]                                                 | 1429.6709 | 78.45  | 0.538604541 |
| 6680027  | DSNYHLLMSVQESLER        |                  | glutamate dehydrogenase 1 [Mus musculus]                                                            | 1920.9243 | 20.38  | 1.480295245 |
| 8567338  | DSPLDFIESCLR            |                  | coatamer protein complex, subunit gamma [Mus musculus]                                              | 1541.7415 | 77.32  | 0.928058515 |
| 28916693 | DSQEEKTEALTSK           |                  | gelsolin [Mus musculus]                                                                             | 1665.7865 | 72.97  | 1.21982769  |
| 31981925 | DSTLIMQLLR              |                  | tyrosine 3-monooxygenase/tryptophan 5-monooxygenase activation protein, epsilon polypeptide [Mus mu | 1189.662  | 63.66  | 1.596250806 |
| 6756039  | DSTLIMQLLR              |                  | tyrosine 3-monooxygenase/tryptophan 5-monooxygenase activation protein, theta polypeptide [Mus musc | 1189.662  | 63.66  | 1.596250806 |
| 6756041  | DSTLIMQLLR              |                  | tyrosine 3-monooxygenase/tryptophan 5-monooxygenase activation protein, zeta polypeptide [Mus muscu | 1189.662  | 63.66  | 1.596250806 |
| 12331400 | DSYIEVLLPLGTDPCLR       |                  | acyl-Coenzyme A thioesterase 3, mitochondrial [Mus musculus]                                        | 1930.0074 | 34.18  | 0           |
| 54261793 | DTEGMDEIDLAEMLR         |                  | plasma membrane calcium ATPase 4 [Mus musculus]                                                     | 1866.8262 | 38.28  | 0           |
| 51491845 | DTELAEELLQWFLQEEK       |                  | clathrin, heavy polypeptide (Hc) [Mus musculus]                                                     | 2121.0415 | 96.02  | 1.215115086 |
| 10946940 | DTFNHLTTWLEDAR          |                  | RAB2, member RAS oncogene family [Mus musculus]                                                     | 1718.8314 | 50.79  | 2.164573354 |
| 41322904 | DTHDQLSEPSEVR           |                  | plectin 1 isoform 1 [Mus musculus]                                                                  | 1512.6996 | 74.56  | 1.284016611 |
| 9790067  | DTNGENIAESLVAEGLATR     |                  | staphylococcal nuclease domain containing 1 [Mus musculus]                                          | 1959.9686 | 63.2   | 1.14718863  |
| 6755142  | DTNGSQFFITVK            |                  | peptidylprolyl isomerase B [Mus musculus]                                                           | 1457.718  | 43.99  | 0           |
| 6680163  | DTPGFIVNR               |                  | L-3-hydroxyacyl-Coenzyme A dehydrogenase, short chain [Mus musculus]                                | 1018.5317 | 36.58  | 0           |
| 54144620 | DTPPPVPVVCDGSGR         |                  | transient receptor potential cation channel, subfamily M, member 3 [Mus musculus]                   | 1497.7614 | 19.08  | 0           |
| 7305295  | DVASLGSQQLDQTQELLQEETR  |                  | myosin, heavy polypeptide 11, smooth muscle [Mus musculus]                                          | 2360.1631 | 53.79  | 0.182767729 |
| 63746482 | DVDIIDHHDNTYTVK         |                  | PREDICTED: filamin, alpha [Mus musculus]                                                            | 1784.8438 | 55.16  | 0           |
| 33859506 | DVFLGTFLYEYSR           |                  | albumin 1 [Mus musculus]                                                                            | 1609.7899 | 80.97  | 2.457195372 |
| 18079339 | DVGGIVLANACGPCIGQWDR    |                  | aconitase 2, mitochondrial [Mus musculus]                                                           | 2043.9736 | 20.08  | 1.221344004 |
| 31560689 | DVGILALEVYFPAQYVDQTDLEK |                  | 3-hydroxy-3-methylglutaryl-Coenzyme A synthase 2 [Mus musculus]                                     | 2626.322  | 54.96  | 14.70913894 |
| 6678499  | DVLNLVYLCEALNLPPEAR     |                  | UDP-glucose dehydrogenase [Mus musculus]                                                            | 2144.1328 | 72.33  | 0.484023235 |
| 27804325 | DVPALEITHFLER           |                  | monoamine oxidase A [Mus musculus]                                                                  | 1640.8702 | 26.47  | 1.532558158 |
| 20532346 | DVYEDLVPVFETVGR         |                  | hypothetical protein LOC245945 [Mus musculus]                                                       | 1866.9209 | 23.86  | 1.483932382 |
| 51467513 | DXSHYFKTIQDLR           |                  | PREDICTED: similar to Keratin, type I cytoskeletal 18 (Cytokeratin 18) (K18) (CK 18) [Homo sapiens] | 1708.8579 | 22.94  | 0           |
| 6754220  | DYFEQYQK                |                  | heterogeneous nuclear ribonucleoprotein A1 [Mus musculus]                                           | 1049.4629 | 22.53  | 0           |

|          |                           |                                                                                                     |           |        |             |
|----------|---------------------------|-----------------------------------------------------------------------------------------------------|-----------|--------|-------------|
| 63663965 | DYFEQYQK                  | PREDICTED: similar to Heterogeneous nuclear ribonucleoprotein A1 (Helix-destabilizing protein) (Sin | 1049.4629 | 22.53  | 0           |
| 27369988 | DYFLFNPVTDIEEIIIR         | calcium-binding transporter [Mus musculus]                                                          | 1984.0028 | 57.67  | 1.229835368 |
| 6680690  | DYGVLLSAGIALR             | peroxiredoxin 3 [Mus musculus]                                                                      | 1476.8107 | 22.51  | 0.980690129 |
| 13384736 | DYIPVDQEELR               | dynein, cytoplasmic, heavy chain 1 [Mus musculus]                                                   | 1376.6711 | 22.24  | 1.086483874 |
| 13385942 | DYIWNTLNSGR               | citrate synthase [Mus musculus]                                                                     | 1338.6466 | 54.22  | 1.15100432  |
| 14042921 | DYIYAVTPLEDALMDR          | splicing factor 3b, subunit 1 [Mus musculus]                                                        | 1997.9901 | 20.7   | 0           |
| 21592285 | DYSSYYAQIK                | keratin 20 [Mus musculus]                                                                           | 1237.572  | 29.69  | 0.58206276  |
| 7242187  | DYTGEDVTPENFLAVLR         | legumain [Mus musculus]                                                                             | 1938.9595 | 62.18  | 1.581781994 |
| 14149756 | DYTYEELLNR                | eukaryotic translation initiation factor 2, subunit 2 (beta) [Mus musculus]                         | 1315.6169 | 24.62  | 4.846132942 |
| 6755809  | EAAFHPEVAPDVR             | talin 1 [Mus musculus]                                                                              | 1437.7162 | 53.62  | 0.847689128 |
| 31982290 | EAAAYAPPASGNQHPGMYPSVSGPK | LIM domain containing preferred translocation partner in lipoma [Mus musculus]                      | 2440.1523 | 70.71  | 0           |
| 15426055 | EAELEPLMPAIR              | coatamer protein complex, subunit beta 1 [Mus musculus]                                             | 1481.7985 | 19.31  | 1.061051851 |
| 6755911  | EAFQEALAAAGDK             | thioredoxin 1 [Mus musculus]                                                                        | 1320.62   | 26.14  | 1.31116828  |
| 33620739 | EAFQLFDR                  | myosin, light polypeptide 6, alkali, smooth muscle and non-muscle [Mus musculus]                    | 1025.5033 | 19.67  | 0.61231411  |
| 58696420 | EAFTHDHEEFAGR             | cytochrome P450, family 2, subfamily c, polypeptide 65 [Mus musculus]                               | 1465.6481 | 47.22  | 0.909533737 |
| 63746482 | EAGAGGLAIIVEGPSK          | PREDICTED: filamin, alpha [Mus musculus]                                                            | 1426.7783 | 33.15  | 0           |
| 6679599  | EAINVEQAFQTIAR            | RAB7, member RAS oncogene family [Mus musculus]                                                     | 1589.8341 | 48.46  | 1.055596398 |
| 19527306 | EALMDVMPYVDILFGNETEAATFAR | adenosine kinase [Mus musculus]                                                                     | 2803.3091 | 30.78  | 0           |
| 30409988 | EALNVFGDDYATEDGTGVR       | galactose-4-epimerase, UDP [Mus musculus]                                                           | 2028.9241 | 47.35  | 1.954430906 |
| 31981515 | EANNFLWPFK                | ribosomal protein L7 [Mus musculus]                                                                 | 1265.6339 | 37.62  | 1.110360083 |
| 29336026 | EAQAGLAEAQEDLEAER         | nonmuscle myosin heavy chain [Mus musculus]                                                         | 1829.8558 | 45.13  | 0.641031579 |
| 11528504 | EAQPLEAEAPGVDLGILPEGR     | niban protein [Mus musculus]                                                                        | 2161.1035 | 51.09  | 1.744670484 |
| 33468887 | EASDPQPEDVDGGLK           | capping protein (actin filament) muscle Z-line, alpha 1 [Mus musculus]                              | 1556.7156 | 19.29  | 0           |
| 31981562 | EATESFASDPLLYRPAVALDTK    | pyruvate kinase 3 [Mus musculus]                                                                    | 2493.2871 | 41.72  | 1.308651061 |
| 6679687  | EATNPPIIQEKKPK            | glucose regulated protein [Mus musculus]                                                            | 1593.8577 | 97.17  | 1.069294415 |
| 23956084 | EATQAVLDKPETLSSDASTR      | acyl-Coenzyme A dehydrogenase, very long chain [Mus musculus]                                       | 2119.0557 | 73.63  | 1.232020425 |
| 63746482 | EATTEFSVDAR               | PREDICTED: filamin, alpha [Mus musculus]                                                            | 1225.5734 | 78.35  | 0.340427661 |
| 12963539 | EAVLIDPVLETAHR            | ETHE1 protein [Mus musculus]                                                                        | 1562.8499 | 27.93  | 0           |
| 6680748  | EAYPGDVLYLHSR             | ATP synthase, H+ transporting, mitochondrial F1 complex, alpha subunit, isoform 1 [Mus musculus]    | 1553.7417 | 73.54  | 0.942038667 |
| 6677805  | ECLPLIIFLR                | ribosomal protein S4, X-linked [Mus musculus]                                                       | 1216.7037 | 30.11  | 1.350208316 |
| 30023842 | EDEEESLNEVGYDDIGGCR       | valosin containing protein [Mus musculus]                                                           | 2128.8667 | 88.94  | 1.354507177 |
| 6756033  | EDGNEEDKENQGDETQQGQPPQR   | nuclease sensitive element binding protein 1 [Mus musculus]                                         | 2628.105  | 102.31 | 1.225676594 |
| 33859482 | EDLYLKPIQR                | eukaryotic translation elongation factor 2 [Mus musculus]                                           | 1274.7136 | 38.89  | 3.470000311 |
| 6754254  | EDQTEYLEER                | heat shock protein 1, alpha [Mus musculus]                                                          | 1311.5802 | 72.42  | 1.615835905 |
| 40556608 | EDQTEYLEER                | heat shock protein 1, beta [Mus musculus]                                                           | 1311.5802 | 72.42  | 1.615835905 |
| 31982755 | EEAESTLQSFRR              | vimentin [Mus musculus]                                                                             | 1296.6096 | 56.8   | 0.652960501 |
| 41322904 | EEELQQLQEQNMLDR           | plectin 1 isoform 1 [Mus musculus]                                                                  | 2131.9849 | 22.72  | 0.790374721 |
| 15617203 | EEFASTCPDDEEIELAYEQVAR    | chloride intracellular channel 1 [Mus musculus]                                                     | 2544.1262 | 97.85  | 1.779075034 |
| 6753036  | EEIFGPMQILK               | aldehyde dehydrogenase 2, mitochondrial [Mus musculus]                                              | 1403.7334 | 31.87  | 0.823365713 |
| 21312260 | EEIFGPVQPLFK              | aldehyde dehydrogenase 1 family, member B1 [Mus musculus]                                           | 1403.7548 | 30.72  | 0           |
| 7305295  | EELAEELASSLSGR            | myosin, heavy polypeptide 11, smooth muscle [Mus musculus]                                          | 1490.7328 | 49.27  | 0           |
| 31560222 | EESGAVAAAASVPAQSTAR       | PYD and CARD domain containing [Mus musculus]                                                       | 1772.8889 | 26.59  | 1.589532016 |
| 46849812 | EESPLIGQQATVSDIPR         | fibronectin 1 [Mus musculus]                                                                        | 1936.9974 | 29.68  | 0.79816036  |
| 13385680 | EEWDIIEGLIR               | 2,4-dienoyl CoA reductase 1, mitochondrial [Mus musculus]                                           | 1372.7092 | 58.23  | 1.806335522 |
| 6679587  | EFADSLGIPFLETSK           | RAB1, member RAS oncogene family [Mus musculus]                                                     | 1724.8776 | 75.11  | 1.496653373 |
| 31542159 | EFDDLSPQQRR               | ATPase, Ca++ transporting, ubiquitous [Mus musculus]                                                | 1363.6234 | 38.75  | 1.401629319 |
| 6806903  | EFDELSPAQR                | ATPase, Ca++ transporting, cardiac muscle, slow twitch 2 [Mus musculus]                             | 1278.5988 | 61.22  | 0.846288342 |
| 21704156 | EFDPITDGSLSGFSR           | caldesmon 1 [Mus musculus]                                                                          | 1678.7991 | 100.19 | 0           |
| 6755863  | EFEPLLNWMK                | tumor rejection antigen gp96 [Mus musculus]                                                         | 1306.652  | 67.01  | 1.122369945 |
| 45598381 | EFPGLSDVITAEVDCTAER       | thioredoxin domain containing 5 [Mus musculus]                                                      | 2051.9688 | 48.74  | 0           |
| 31982275 | EFSDVVPYPISLR             | heat shock protein 4 [Mus musculus]                                                                 | 1735.9286 | 60.1   | 1.169417193 |
| 6806903  | EFTLEFSR                  | ATPase, Ca++ transporting, cardiac muscle, slow twitch 2 [Mus musculus]                             | 1028.5006 | 44.37  | 0.997278798 |
| 36031132 | EFTLEFSR                  | ATPase, Ca++ transporting, fast twitch 1 [Mus musculus]                                             | 1028.5006 | 44.37  | 0.997278798 |
| 31542159 | EFTLEFSR                  | ATPase, Ca++ transporting, ubiquitous [Mus musculus]                                                | 1028.5006 | 44.37  | 0.997278798 |
| 6996911  | EFVEEFWPAVQSSALYEDR       | argininosuccinate synthetase [Mus musculus]                                                         | 2415.1533 | 28.15  | 0.973188166 |
| 21426821 | EGDVLTLLESER              | ribosomal protein S28 [Mus musculus]                                                                | 1360.6953 | 70.75  | 1.296687056 |
| 63594458 | EGDYFTQQGEFR              | PREDICTED: source of immunodominant MHC-associated peptides [Mus musculus]                          | 1476.6487 | 22.05  | 1.326567468 |
| 29789191 | EGIDPAPYYWYTDQR           | asparaginyl-tRNA synthetase [Mus musculus]                                                          | 1873.8492 | 33.71  | 0           |
| 33859482 | EGIPALDNFLDKL             | eukaryotic translation elongation factor 2 [Mus musculus]                                           | 1444.7665 | 92.11  | 1.17715323  |
| 59709449 | EGLLLWCQR                 | actinin alpha 2 [Mus musculus]                                                                      | 1117.5807 | 43.97  | 0.781412866 |

|          |                               |                  |                                                                                                     |           |        |             |
|----------|-------------------------------|------------------|-----------------------------------------------------------------------------------------------------|-----------|--------|-------------|
| 7304855  | EGLLLCQQR                     |                  | actinin alpha 3 [Mus musculus]                                                                      | 1117.5807 | 43.97  | 0.781412866 |
| 11230802 | EGLLLCQQR                     |                  | actinin alpha 4 [Mus musculus]                                                                      | 1117.5807 | 43.97  | 0.781412866 |
| 6679439  | EGMNIVEAMER                   |                  | peptidylprolyl isomerase A [Mus musculus]                                                           | 1278.5878 | 57.59  | 1.426376667 |
| 63650244 | EGMNIVEAMER                   |                  | PREDICTED: similar to Peptidyl-prolyl cis-trans isomerase A (PPIase) (Rotamase) (Cyclophilin A) (Cy | 1278.5878 | 57.59  | 1.426376667 |
| 31981549 | EGNALFTFPNTPVK                |                  | sulfide quinone reductase-like [Mus musculus]                                                       | 1534.787  | 41.43  | 1.077542466 |
| 31980648 | EGNDLYHEMIESGVINLK            |                  | ATP synthase, H+ transporting mitochondrial F1 complex, beta subunit [Mus musculus]                 | 2061.0032 | 106.61 | 1.115862491 |
| 63746482 | EGSYSISVLYGEEVPR              |                  | PREDICTED: filamin, alpha [Mus musculus]                                                            | 1913.9171 | 84.94  | 0.329761715 |
| 21450339 | EGVLDAMGDVAFGVPSVIVSR         |                  | hypothetical protein LOC234564 [Mus musculus]                                                       | 2118.0933 | 53.86  | 0           |
| 21450339 | EGYLHIGGTTQQAQR               |                  | hypothetical protein LOC234564 [Mus musculus]                                                       | 1658.8359 | 21.75  | 0.29755941  |
| 12963527 | EHNGQVTGIDWAPESNR             |                  | actin related protein 2/3 complex, subunit 1B [Mus musculus]                                        | 1909.8848 | 33.05  | 1.584003981 |
| 26986563 | EIFAQALAPFR                   |                  | choline dehydrogenase [Mus musculus]                                                                | 1391.7179 | 20.44  | 2.214494028 |
| 7305085  | EIFEQPESVNTMR                 |                  | glutamine fructose-6-phosphate transaminase 1 [Mus musculus]                                        | 1678.8245 | 85.2   | 1.317385899 |
| 28173568 | EIFLSQPILLEEAPLK              |                  | protein phosphatase 1, catalytic subunit, beta [Mus musculus]                                       | 1953.1415 | 72.3   | 1.03932375  |
| 6755901  | EIIDLVDR                      |                  | tubulin, alpha 1 [Mus musculus]                                                                     | 1085.6182 | 59.35  | 1.129425985 |
| 34740335 | EIIDLVDR                      |                  | tubulin, alpha 2 [Mus musculus]                                                                     | 1085.6182 | 59.35  | 1.129425985 |
| 6678469  | EIIDLVDR                      |                  | tubulin, alpha 6 [Mus musculus]                                                                     | 1085.6182 | 59.35  | 1.129425985 |
| 6680924  | EILVGDVGQTVDDPYTTFVK          |                  | cofilin 1, non-muscle [Mus musculus]                                                                | 2196.1082 | 86.98  | 0           |
| 27804325 | EIPVDAPWQAR                   |                  | monoamine oxidase A [Mus musculus]                                                                  | 1281.6578 | 39.62  | 1.088765222 |
| 20137008 | EISPDTLTLLDLQNDISELRK         |                  | biglycan [Mus musculus]                                                                             | 2414.2329 | 42.6   | 1.812821477 |
| 6671507  | EITALAPSTMK                   |                  | actin, alpha 2, smooth muscle, aorta [Mus musculus]                                                 | 1161.6177 | 82.95  | 0.455084338 |
| 6671509  | EITALAPSTMK                   |                  | actin, beta, cytoplasmic [Mus musculus]                                                             | 1161.6177 | 82.95  | 0.455084338 |
| 63652452 | EITALAPSTMK                   |                  | PREDICTED: similar to cytoplasmic beta-actin [Mus musculus]                                         | 1161.6177 | 82.95  | 0.455084338 |
| 6671507  | EITALAPSTMK                   | Oxidation (M)    | actin, alpha 2, smooth muscle, aorta [Mus musculus]                                                 | 1177.6071 | 30.67  | 0           |
| 6671509  | EITALAPSTMK                   | Oxidation (M)    | actin, beta, cytoplasmic [Mus musculus]                                                             | 1177.6071 | 30.67  | 0           |
| 63652452 | EITALAPSTMK                   | Oxidation (M)    | PREDICTED: similar to cytoplasmic beta-actin [Mus musculus]                                         | 1177.6071 | 30.67  | 0           |
| 14861854 | EITINQSLAPLSVDIDPTIQVVR       |                  | keratin complex 2, basic, gene 7 [Mus musculus]                                                     | 2663.415  | 27.01  | 0.647488882 |
| 33859488 | EIVHIQAGQCGNQIGAK             |                  | tubulin, beta 2 [Mus musculus]                                                                      | 1765.9075 | 86.43  | 0.934300652 |
| 12963615 | EIVHIQAGQCGNQIGAK             |                  | tubulin, beta 3 [Mus musculus]                                                                      | 1765.9075 | 86.43  | 0.934300652 |
| 7106439  | EIVHIQAGQCGNQIGAK             |                  | tubulin, beta 5 [Mus musculus]                                                                      | 1765.9075 | 86.43  | 0.934300652 |
| 7949051  | EKPYFPIPEDCTFIQNVPLEDR        |                  | heterogenous nuclear ribonucleoprotein U [Mus musculus]                                             | 2650.2886 | 29.2   | 1.385453126 |
| 6755372  | ELAEDGYSQVEVR                 |                  | ribosomal protein S3 [Mus musculus]                                                                 | 1423.6733 | 31.7   | 2.160353179 |
| 51712562 | ELAPYDENWFYTR                 |                  | PREDICTED: similar to ribosomal protein S19 [Mus musculus]                                          | 1703.7823 | 35     | 1.261721898 |
| 24429590 | ELDALDANDELTPLR               |                  | DEAH (Asp-Glu-Ala-His) box polypeptide 9 [Mus musculus]                                             | 1741.8628 | 50.56  | 2.013381726 |
| 7305295  | ELDEATESNEAMGR                |                  | myosin, heavy polypeptide 11, smooth muscle [Mus musculus]                                          | 1551.6782 | 73.74  | 0           |
| 20137006 | ELEDATETADAMNR                |                  | myosin, heavy polypeptide 9, non-muscle [Mus musculus]                                              | 1565.6864 | 31.75  | 1.031607415 |
| 7305295  | ELEGHISDLQEDLDSEK             |                  | myosin, heavy polypeptide 11, smooth muscle [Mus musculus]                                          | 1984.9174 | 120.72 | 0.191937947 |
| 7106435  | ELEPGVEYFIR                   |                  | tenascin C [Mus musculus]                                                                           | 1351.6874 | 25.37  | 0.470340769 |
| 20137006 | ELETQISELQEDLESER             |                  | myosin, heavy polypeptide 9, non-muscle [Mus musculus]                                              | 2047.9739 | 63.82  | 2.309039907 |
| 6680067  | ELFEADPER                     |                  | glucose phosphate isomerase 1 [Mus musculus]                                                        | 1105.5181 | 30.65  | 1.337432806 |
| 29336026 | ELFQETLESR                    |                  | nonmuscle myosin heavy chain [Mus musculus]                                                         | 1364.7089 | 60.83  | 1.439827186 |
| 23956084 | ELGAFGLQVPSLGLGLSNTQYAR       |                  | acyl-Coenzyme A dehydrogenase, very long chain [Mus musculus]                                       | 2577.3398 | 29.14  | 0.966546374 |
| 63476037 | ELGTIQQVISER                  |                  | PREDICTED: procollagen, type VI, alpha 3 [Mus musculus]                                             | 1372.7428 | 52.85  | 0.428024581 |
| 6679687  | ELNDFISYLQR                   |                  | glucose regulated protein [Mus musculus]                                                            | 1397.7162 | 70.42  | 1.106628046 |
| 63476037 | ELPNIER                       |                  | PREDICTED: procollagen, type VI, alpha 3 [Mus musculus]                                             | 999.5058  | 42.22  | 0           |
| 11230802 | ELPPDQAEYCIAR                 |                  | actinin alpha 4 [Mus musculus]                                                                      | 1504.7131 | 28.97  | 2.071238179 |
| 18079351 | ELPSGVEELLNLGHDPLADR          |                  | major vault protein [Mus musculus]                                                                  | 2174.1116 | 20.79  | 0.9586323   |
| 33563250 | ELQAQLQEQQVQVEMDMSPDLTAALR    |                  | desmin [Mus musculus]                                                                               | 3099.5376 | 53.25  | 0.182803172 |
| 33563250 | ELQAQLQEQQVQVEMDMSPDLTAALR    | Oxidation (M)    | desmin [Mus musculus]                                                                               | 3115.5535 | 21.79  | 0           |
| 13624315 | ELQSQISDTSVVLSDMNSR           |                  | keratin complex 2, basic, gene 8 [Mus musculus]                                                     | 2109.0171 | 140.45 | 1.522237808 |
| 63565108 | ELQSQISDTSVVLSDMNSR           |                  | PREDICTED: similar to cytokeratin EndoA - mouse [Mus musculus]                                      | 2109.0171 | 140.45 | 1.522237808 |
| 46275826 | ELVDEEAEQAQLLSQAENWQR         |                  | laminin, alpha 4 [Mus musculus]                                                                     | 2602.2065 | 41.83  | 0           |
| 13385076 | ELWAVLNGWR                    |                  | sorcin [Mus musculus]                                                                               | 1243.6625 | 25.37  | 1.49741238  |
| 13385076 | ELWAVLNGWR                    | Deamidation (NQ) | sorcin [Mus musculus]                                                                               | 1244.6554 | 20.26  | 0           |
| 31982755 | EMEENFALEAANYQDTIGR           |                  | vimentin [Mus musculus]                                                                             | 2200.9939 | 127.71 | 0           |
| 7305295  | EMEGLSQQYEEK                  |                  | myosin, heavy polypeptide 11, smooth muscle [Mus musculus]                                          | 1470.6611 | 78.84  | 0           |
| 7305295  | ENADLAGELR                    |                  | myosin, heavy polypeptide 11, smooth muscle [Mus musculus]                                          | 1087.5354 | 70.13  | 0.179700831 |
| 31560680 | ENDYYTPTGEFR                  |                  | integral membrane protein 1 [Mus musculus]                                                          | 1491.644  | 39.57  | 1.104985674 |
| 13384736 | ENFIPTIVNFSAEISDAIR           |                  | dynein, cytoplasmic, heavy chain 1 [Mus musculus]                                                   | 2265.1438 | 22.14  | 1.316138198 |
| 21450129 | ENGTITAAASTLNDGAAALVLMATAEAQR |                  | acetyl-Coenzyme A acetyltransferase 1 precursor [Mus musculus]                                      | 2945.4607 | 51.52  | 1.155523021 |
| 31982522 | ENLLGEPGMGFK                  |                  | acyl-Coenzyme A dehydrogenase, short chain [Mus musculus]                                           | 1291.6295 | 30.96  | 0.961184442 |

|          |                          |                    |                                                                                                                       |           |        |             |
|----------|--------------------------|--------------------|-----------------------------------------------------------------------------------------------------------------------|-----------|--------|-------------|
| 18250284 | ENTEGEYSGIEHVIVDGVVQSIK  |                    | isocitrate dehydrogenase 3 (NAD+) alpha [Mus musculus]                                                                | 2502.196  | 19.64  | 0           |
| 6753484  | ENYAELDDGFLK             |                    | procollagen, type VI, alpha 1 [Mus musculus]                                                                          | 1526.7389 | 72.24  | 0           |
| 33469029 | EPGAAAEGAAEEAR           |                    | acyl-Coenzyme A binding domain containing 3 [Mus musculus]                                                            | 1457.6583 | 54.9   | 0.953757358 |
| 31982290 | EPIMPAPGQEETVR           |                    | LIM domain containing preferred translocation partner in lipoma [Mus musculus]                                        | 1553.7761 | 80.58  | 1.040573587 |
| 31981657 | EPITVSSEQMSHFR           |                    | carbonic anhydrase 2 [Mus musculus]                                                                                   | 1647.7864 | 110.45 | 1.11430657  |
| 7305295  | EQADFAIEALAK             |                    | myosin, heavy polypeptide 11, smooth muscle [Mus musculus]                                                            | 1305.6753 | 78.79  | 0           |
| 20137006 | EQADFAIEALAK             | Deamidation (NQ)   | myosin, heavy polypeptide 9, non-muscle [Mus musculus]                                                                | 1305.6753 | 78.79  | 0           |
| 7305295  | EQADFAIEALAK             |                    | myosin, heavy polypeptide 11, smooth muscle [Mus musculus]                                                            | 1306.6766 | 37.85  | 0           |
| 20137006 | EQADFAIEALAK             | Deamidation (NQ)   | myosin, heavy polypeptide 9, non-muscle [Mus musculus]                                                                | 1306.6766 | 37.85  | 0           |
| 6680836  | EQFLDGDWNTNR             |                    | calreticulin [Mus musculus]                                                                                           | 1451.6598 | 83.46  | 0.997003049 |
| 51764087 | EQGFLSFWR                |                    | PREDICTED: solute carrier family 25 (mitochondrial carrier, adenine nucleotide translocator), member 5 [Mus musculus] | 1169.5726 | 57.2   | 0.274346265 |
| 22094075 | EQGVLSFWR                |                    | solute carrier family 25, member 5 [Mus musculus]                                                                     | 1121.5758 | 71.05  | 1.558510935 |
| 50355690 | EQIVPKPEEEVAQK           |                    | ribosomal protein L17 [Mus musculus]                                                                                  | 1623.8644 | 56.4   | 0           |
| 6678499  | EQIVVDLSHPGVSADDQVSR     |                    | UDP-glucose dehydrogenase [Mus musculus]                                                                              | 2151.0754 | 121.02 | 0.355200425 |
| 6754782  | EQLLQSNPVLAEAFGNK        |                    | myosin IB [Mus musculus]                                                                                              | 1857.9592 | 30.47  | 0           |
| 51766008 | EQLLQSNPVLAEAFGNK        |                    | PREDICTED: myosin IA [Mus musculus]                                                                                   | 1857.9592 | 30.47  | 0           |
| 30725802 | EQNLRYSCGQSVR            | 2 Deamidation (NQ) | hypothetical protein LOC106755 [Mus musculus]                                                                         | 1541.719  | 19.94  | 0           |
| 21450277 | EQPLDEELKDAFQNAYLELGLGER |                    | Na+/K+ -ATPase alpha 1 subunit [Mus musculus]                                                                         | 2834.3862 | 108.15 | 1.122278278 |
| 13384736 | EQPWVSVQPR               |                    | dynein, cytoplasmic, heavy chain 1 [Mus musculus]                                                                     | 1225.6346 | 19.78  | 0.395166373 |
| 40556608 | EQVANSAFVER              |                    | heat shock protein 1, beta [Mus musculus]                                                                             | 1249.619  | 67.11  | 1.322429345 |
| 40556608 | EQVANSAFVER              | 2 Deamidation (NQ) | heat shock protein 1, beta [Mus musculus]                                                                             | 1251.5835 | 21.64  | 0           |
| 6677935  | ESDGTGPGGLASLENER        |                    | sorbin and SH3 domain containing 1 [Mus musculus]                                                                     | 1631.7552 | 27.45  | 0           |
| 6678752  | ESPYDHQSLQALQEAFSTR      |                    | lymphocyte antigen 74 [Mus musculus]                                                                                  | 2308.0898 | 120.99 | 1.663188888 |
| 6754994  | ESTGAQVQVAGDMLPNSTER     |                    | poly(rC) binding protein 1 [Mus musculus]                                                                             | 2089.9905 | 72.84  | 1.264682415 |
| 46559834 | ESVQLYEDEVR              |                    | desmuslin isoform M [Mus musculus]                                                                                    | 1366.6561 | 42.22  | 0.387273458 |
| 9910482  | ESVQVPDDQDFR             |                    | START domain containing 10 [Mus musculus]                                                                             | 1434.6613 | 23.43  | 2.139982117 |
| 20874851 | ESYSVYVYK                |                    | PREDICTED: similar to histone H2b-616 [Mus musculus]                                                                  | 1137.5425 | 32.39  | 0           |
| 63492203 | ETSYYEALANQR             |                    | PREDICTED: ribosome binding protein 1 [Mus musculus]                                                                  | 1410.657  | 38.79  | 1.323693946 |
| 22122523 | ETTPFYPR                 |                    | GDP-mannose 4, 6-dehydratase [Mus musculus]                                                                           | 1010.4943 | 26.06  | 1.148664665 |
| 30023842 | ETVVEVPQVTWEDIGLEDVKR    |                    | valosin containing protein [Mus musculus]                                                                             | 2498.283  | 50.05  | 0           |
| 6680748  | EVAAFQAFGSDLDAAATQQLSR   |                    | ATP synthase, H+ transporting, mitochondrial F1 complex, alpha subunit, isoform 1 [Mus musculus]                      | 2338.1829 | 108.88 | 1.030127292 |
| 31560449 | EVAGQVGPLQDLMVR          |                    | aspartyl aminopeptidase [Mus musculus]                                                                                | 1710.9231 | 56.24  | 1.147167416 |
| 30348966 | EVDLLEQWIAER             |                    | spectrin beta 2 isoform 1 [Mus musculus]                                                                              | 1502.722  | 38.12  | 0.969291198 |
| 7106421  | EVDLLEQWIAER             |                    | spectrin beta 2 isoform 2 [Mus musculus]                                                                              | 1502.722  | 38.12  | 0.969291198 |
| 63650229 | EVDEQMLNVQNK             |                    | PREDICTED: similar to TUBULIN BETA CHAIN (T BETA-15) [Mus musculus]                                                   | 1446.6964 | 67.24  | 1.254807422 |
| 22165384 | EVDEQMLNVQNK             |                    | tubulin, beta, 2 [Mus musculus]                                                                                       | 1446.6964 | 67.24  | 1.254807422 |
| 33859488 | EVDEQMLNVQNK             |                    | tubulin, beta 2 [Mus musculus]                                                                                        | 1446.6964 | 67.24  | 1.254807422 |
| 7106439  | EVDEQMLNVQNK             |                    | tubulin, beta 5 [Mus musculus]                                                                                        | 1446.6964 | 67.24  | 1.254807422 |
| 30023842 | EVDIGIPDATGR             |                    | valosin containing protein [Mus musculus]                                                                             | 1242.6315 | 54.3   | 1.548516992 |
| 12963527 | EVEERPAPTPWGSK           |                    | actin related protein 2/3 complex, subunit 1B [Mus musculus]                                                          | 1582.7963 | 20.79  | 1.938374624 |
| 14149756 | EVEPEPTEEKVDVADEEDSR     |                    | eukaryotic translation initiation factor 2, subunit 2 (beta) [Mus musculus]                                           | 2317.9854 | 110.56 | 1.690087421 |
| 46593021 | EVESIGAHLNAYSTR          |                    | ubiquinol-cytochrome c reductase core protein 1 [Mus musculus]                                                        | 1646.817  | 23.18  | 1.197495471 |
| 31543315 | EVFEDAMEIR               |                    | nucleolin [Mus musculus]                                                                                              | 1238.5735 | 26.75  | 2.032658854 |
| 31980685 | EVGAFGTPVINLGR           |                    | glucosamine [Mus musculus]                                                                                            | 1530.8234 | 37.52  | 1.761392003 |
| 7305295  | EVLQVEDER                |                    | myosin, heavy polypeptide 11, smooth muscle [Mus musculus]                                                            | 1229.6403 | 63.86  | 0.159077285 |
| 6678573  | EVQGNESSETR              |                    | villin 1 [Mus musculus]                                                                                               | 1295.5894 | 31.42  | 0           |
| 33859811 | EVQSEFIEVMNEIWANDQIR     |                    | hydroxyacyl-Coenzyme A dehydrogenase/3-ketoacyl-Coenzyme A thiolase/enoyl-Coenzyme A hydratase (tri                   | 2450.1768 | 24.1   | 0           |
| 6680816  | EVSFQATGDSEWR            |                    | complement component 1, q subcomponent binding protein [Mus musculus]                                                 | 1511.682  | 19.67  | 1.294244818 |
| 21450129 | EVMGNVIQGGEGQAPTR        |                    | acetyl-Coenzyme A acetyltransferase 1 precursor [Mus musculus]                                                        | 1905.9222 | 67.55  | 1.282212443 |
| 31560611 | EWIEGVTGR                |                    | calponin 1 [Mus musculus]                                                                                             | 1046.5298 | 55.97  | 0.140522785 |
| 6753066  | EYQDIEEMIFHR             |                    | amine oxidase, copper containing 3 [Mus musculus]                                                                     | 1609.7407 | 37.17  | 0           |
| 33563250 | EYQDLLNVK                |                    | desmin [Mus musculus]                                                                                                 | 1121.5812 | 57.76  | 0           |
| 34328368 | EYQDLLNVK                |                    | internexin neuronal intermediate filament protein, alpha [Mus musculus]                                               | 1121.5812 | 57.76  | 0           |
| 46275814 | EYQDLLNVK                |                    | neurofilament, heavy polypeptide [Mus musculus]                                                                       | 1121.5812 | 57.76  | 0           |
| 31982755 | EYQDLLNVK                |                    | vimentin [Mus musculus]                                                                                               | 1121.5812 | 57.76  | 0           |
| 41054806 | EYQLNDSAAAYLNDLER        |                    | guanine nucleotide binding protein, alpha inhibiting 2 [Mus musculus]                                                 | 2076.9609 | 35.54  | 1.379941428 |
| 63635087 | EYSSELNAPSQESDHPTR       |                    | PREDICTED: RNA binding motif protein 25 [Mus musculus]                                                                | 2032.8907 | 37.83  | 2.90941961  |
| 31560560 | FAAATGATPIAGR            |                    | laminin receptor 1 (ribosomal protein SA) [Mus musculus]                                                              | 1203.6525 | 51.86  | 1.807341746 |
| 6680067  | FAAYFQQGDMESNGK          |                    | glucose phosphate isomerase 1 [Mus musculus]                                                                          | 1692.7477 | 46.35  | 0           |
| 6753254  | FADDELIIDFDFNVR          |                    | calpain 2 [Mus musculus]                                                                                              | 1828.8821 | 54.09  | 0.939348601 |



|          |                              |                                                                                                      |           |        |             |
|----------|------------------------------|------------------------------------------------------------------------------------------------------|-----------|--------|-------------|
| 31982755 | FADLSEAAANR                  | vimentin [Mus musculus]                                                                              | 1093.525  | 62.64  | 0.671862272 |
| 31560613 | FAEFAEAIPIR                  | chaperonin subunit 8 (theta) [Mus musculus]                                                          | 1150.5864 | 30.5   | 1.301835165 |
| 6755863  | FAFQAEVNR                    | tumor rejection antigen gp96 [Mus musculus]                                                          | 1081.5449 | 58.53  | 1.195893104 |
| 7710042  | FALGISAINAEVDSGDVGR          | IQ motif containing GTPase activating protein 1 [Mus musculus]                                       | 1890.9612 | 35.53  | 0           |
| 19482160 | FALITWIGEDVSGLQR             | coactosin-like 1 [Mus musculus]                                                                      | 1804.9528 | 33.51  | 2.348685041 |
| 6753240  | FAMEPEEFSDTLR                | calcium binding protein, intestinal [Mus musculus]                                                   | 1686.7401 | 66.25  | 1.290601498 |
| 21704206 | FAPPEAPEPWSGVR               | carboxylesterase 2 [Mus musculus]                                                                    | 1539.7587 | 46.92  | 0.861984328 |
| 27370126 | FAPPEAPEPWSGVR               | carboxylesterase 5 [Mus musculus]                                                                    | 1539.7587 | 46.92  | 0.861984328 |
| 23956214 | FAQHGTFEYEYSQR               | splicing factor proline/glutamine rich (polypyrimidine tract binding protein associated) [Mus muscu] | 1762.7927 | 21.96  | 1.542608146 |
| 33563250 | FASEANGYQDNIR                | desmin [Mus musculus]                                                                                | 1555.7136 | 32.74  | 0.155374707 |
| 33563250 | FASEANGYQDNIR                | desmin [Mus musculus]                                                                                | 1556.708  | 78.39  | 0.303230623 |
| 63476037 | FASEIVDTVYEDGDSIR            | PREDICTED: procollagen, type VI, alpha 3 [Mus musculus]                                              | 1915.8853 | 95.4   | 0           |
| 31560611 | FASQQGMTAYGTR                | calponin 1 [Mus musculus]                                                                            | 1417.6727 | 106.4  | 0.60145226  |
| 10946574 | FCTGLTQIETLFK                | creatine kinase, brain [Mus musculus]                                                                | 1500.7756 | 84.44  | 0.212043251 |
| 31980685 | FDALALATSAAALMNIIR           | glucosamine [Mus musculus]                                                                           | 1677.8929 | 43.13  | 1.188536109 |
| 6755901  | FDGALNVDLTFEQTNLVPYPR        | tubulin, alpha 1 [Mus musculus]                                                                      | 2409.2146 | 73.62  | 0.990588632 |
| 34740335 | FDGALNVDLTFEQTNLVPYPR        | tubulin, alpha 2 [Mus musculus]                                                                      | 2409.2146 | 73.62  | 0.990588632 |
| 6678467  | FDGALNVDLTFEQTNLVPYPR        | tubulin, alpha 4 [Mus musculus]                                                                      | 2409.2146 | 73.62  | 0.990588632 |
| 6678469  | FDGALNVDLTFEQTNLVPYPR        | tubulin, alpha 6 [Mus musculus]                                                                      | 2409.2146 | 73.62  | 0.990588632 |
| 33598964 | FDQLLAEEK                    | myosin heavy chain 10, non-muscle [Mus musculus]                                                     | 1092.5538 | 32.4   | 0           |
| 7305295  | FDQLLAEEK                    | myosin, heavy polypeptide 11, smooth muscle [Mus musculus]                                           | 1092.5538 | 32.4   | 0           |
| 20137006 | FDQLLAEEK                    | myosin, heavy polypeptide 9, non-muscle [Mus musculus]                                               | 1092.5538 | 32.4   | 0           |
| 29336026 | FDQLLAEEK                    | nonmuscle myosin heavy chain [Mus musculus]                                                          | 1092.5538 | 32.4   | 0           |
| 6677805  | FDTGNLCMVTGGANLGR            | ribosomal protein S4, X-linked [Mus musculus]                                                        | 1725.8137 | 55.05  | 1.436414017 |
| 6679439  | FEDENFILK                    | peptidylprolyl isomerase A [Mus musculus]                                                            | 1154.5676 | 56.29  | 2.255368123 |
| 10092608 | FEDGDLTYQSNAILR              | glutathione S-transferase, pi 1 [Mus musculus]                                                       | 1854.9141 | 100.66 | 1.27593594  |
| 33563270 | FEEFLQR                      | oxoglutarate dehydrogenase (lipoamide) [Mus musculus]                                                | 968.4772  | 26.87  | 1.256010836 |
| 31981690 | FEELNADLFR                   | heat shock protein 8 [Mus musculus]                                                                  | 1253.6233 | 58.38  | 1.373856651 |
| 31981722 | FEELNMDLFR                   | heat shock 70kD protein 5 (glucose-regulated protein) [Mus musculus]                                 | 1313.6244 | 66.07  | 0.88344202  |
| 9790073  | FEEQVYNIPIR                  | cadherin 17 [Mus musculus]                                                                           | 1407.7375 | 49.02  | 1.88384818  |
| 13385374 | FEIWDTAGQER                  | RAB5A, member RAS oncogene family [Mus musculus]                                                     | 1351.6373 | 35.16  | 1.262707566 |
| 29789257 | FEIWDTAGQER                  | RAB5C, member RAS oncogene family [Mus musculus]                                                     | 1351.6373 | 35.16  | 1.262707566 |
| 31981690 | FELTGIPPAPR                  | heat shock protein 8 [Mus musculus]                                                                  | 1197.6595 | 42.49  | 1.255637093 |
| 6678145  | FFDEESYLLR                   | signal sequence receptor, delta [Mus musculus]                                                       | 1405.6593 | 51.22  | 1.379184518 |
| 16716471 | FFQELPASDSAFK                | hypothetical protein LOC94184 [Mus musculus]                                                         | 1486.7279 | 52.02  | 0           |
| 8567336  | FFTAFDANGR                   | chloride channel calcium activated 3 [Mus musculus]                                                  | 1145.5393 | 49.47  | 1.436514238 |
| 6755809  | FFYSDQNVDSR                  | talin 1 [Mus musculus]                                                                               | 1377.6169 | 57.69  | 0.603608975 |
| 6755372  | FGFPEGSVELYAEK               | ribosomal protein S3 [Mus musculus]                                                                  | 1572.7734 | 37.73  | 2.013762885 |
| 63746482 | FGGEHVPNSPFQVTALAGDQPTVQTPLR | PREDICTED: filamin, alpha [Mus musculus]                                                             | 2963.4788 | 80.68  | 0.252420295 |
| 21704096 | FGGNPGGFGNQGGFGNSR           | TAR DNA binding protein isoform 1 [Mus musculus]                                                     | 1726.7777 | 58.31  | 2.260399723 |
| 13384736 | FGNPLLVDVESYDPLNPNVLR        | dynein, cytoplasmic, heavy chain 1 [Mus musculus]                                                    | 2598.3411 | 47.1   | 1.142213599 |
| 23956214 | FGQGGAGPVGGQGP               | splicing factor proline/glutamine rich (polypyrimidine tract binding protein associated) [Mus muscu] | 1341.6721 | 50.84  | 1.538060299 |
| 31981562 | FGVEQDVMVFASIR               | pyruvate kinase 3 [Mus musculus]                                                                     | 1859.9053 | 92.88  | 1.204061887 |
| 6671690  | FHQLDIDNPQSIR                | carbonyl reductase 1 [Mus musculus]                                                                  | 1582.8018 | 28.46  | 1.709953844 |
| 6679687  | FISDKDASVVGFFR               | glucose regulated protein [Mus musculus]                                                             | 1587.8213 | 35.43  | 1.858226465 |
| 18079339 | FKLEAPDADELPR                | aconitase 2, mitochondrial [Mus musculus]                                                            | 1500.7711 | 48.68  | 0           |
| 33563270 | FLDTAFDLDAFK                 | oxoglutarate dehydrogenase (lipoamide) [Mus musculus]                                                | 1402.6837 | 25.57  | 0           |
| 33563250 | FLEQQNAALAAEVNR              | desmin [Mus musculus]                                                                                | 1673.8673 | 92.37  | 0.204956253 |
| 6678643  | FLEQQNKVLQTK                 | keratin complex 2, basic, gene 1 [Mus musculus]                                                      | 1475.793  | 73.54  | 0           |
| 7305295  | FLFVDK                       | myosin, heavy polypeptide 11, smooth muscle [Mus musculus]                                           | 768.4169  | 36.82  | 0.242319227 |
| 22164798 | FLHDPSTATQGFVGCALSSNIQR      | selenium binding protein 1 [Mus musculus]                                                            | 2348.1362 | 20.63  | 1.126487851 |
| 31980648 | FLSQPFQVAEVFTGHMGK           | ATP synthase, H+ transporting mitochondrial F1 complex, beta subunit [Mus musculus]                  | 2023.0007 | 35.66  | 0           |
| 29789191 | FLSWILNR                     | asparaginyl-tRNA synthetase [Mus musculus]                                                           | 1048.588  | 23.03  | 1.067936362 |
| 29336026 | FLTNGPSSSPGQER               | nonmuscle myosin heavy chain [Mus musculus]                                                          | 1476.7159 | 66.34  | 1.21141591  |
| 25020120 | FMNQEVETQR                   | PREDICTED: laminin, alpha 5 [Mus musculus]                                                           | 1281.5939 | 37.09  | 0.813644603 |
| 13384828 | FMTEDTTDAPFR                 | serine (or cysteine) proteinase inhibitor, clade B, member 1a [Mus musculus]                         | 1430.635  | 41.96  | 1.030192952 |
| 6671622  | FNASQLITQR                   | B-cell receptor-associated protein 37 [Mus musculus]                                                 | 1177.6282 | 24.23  | 1.11837528  |
| 63540743 | FNDEHIPDSPFVVPVASLSDAR       | PREDICTED: filamin C, gamma [Mus musculus]                                                           | 2527.2222 | 61.6   | 0.421492466 |
| 63660302 | FNDEHIPDSPYLVPIVAPSDDAR      | PREDICTED: filamin B, beta [Mus musculus]                                                            | 2567.2495 | 66.44  | 1.716616701 |
| 63746482 | FNEEHIPDSPFVVPVAPSPGDAR      | PREDICTED: filamin, alpha [Mus musculus]                                                             | 2467.1909 | 109.37 | 0.238895334 |

|          |                           |                                                                                                     |           |        |             |
|----------|---------------------------|-----------------------------------------------------------------------------------------------------|-----------|--------|-------------|
| 6677777  | FNPFVTSDR                 | ribosomal protein L26 [Mus musculus]                                                                | 1082.526  | 35.96  | 1.908867822 |
| 6753272  | FNSANEDNVTQVR             | catalase [Mus musculus]                                                                             | 1493.7002 | 57.12  | 1.035153688 |
| 6678365  | FNWWDTAGQEK               | RAN, member RAS oncogene family [Mus musculus]                                                      | 1294.6167 | 43.22  | 1.174963031 |
| 13384736 | FNYGFEYLGVDK              | dynein, cytoplasmic, heavy chain 1 [Mus musculus]                                                   | 1579.7677 | 19.22  | 0           |
| 19527018 | FPEDGPELEEVLQAAADR        | dipeptidylpeptidase III [Mus musculus]                                                              | 2283.1475 | 31.56  | 1.603538093 |
| 22165384 | FPGQLNADLR                | tubulin, beta, 2 [Mus musculus]                                                                     | 1130.595  | 55.37  | 0.952741003 |
| 33859488 | FPGQLNADLR                | tubulin, beta 2 [Mus musculus]                                                                      | 1130.595  | 55.37  | 0.952741003 |
| 12963615 | FPGQLNADLR                | tubulin, beta 3 [Mus musculus]                                                                      | 1130.595  | 55.37  | 0.952741003 |
| 31981939 | FPGQLNADLR                | tubulin, beta 4 [Mus musculus]                                                                      | 1130.595  | 55.37  | 0.952741003 |
| 7106439  | FPGQLNADLR                | tubulin, beta 5 [Mus musculus]                                                                      | 1130.595  | 55.37  | 0.952741003 |
| 27754056 | FPGQLNADLR                | tubulin, beta 6 [Mus musculus]                                                                      | 1130.595  | 55.37  | 0.952741003 |
| 33859560 | FQILEGPPESMGR             | guanosine diphosphate (GDP) dissociation inhibitor 1 [Mus musculus]                                 | 1460.7258 | 28.28  | 1.200679898 |
| 40254595 | FQLTDSQIYEVLSVIR          | dihydropyrimidinase-like 2 [Mus musculus]                                                           | 1911.0173 | 71.31  | 0.781982367 |
| 40254595 | FQMPDQGMTSADDFQGTGK       | dihydropyrimidinase-like 2 [Mus musculus]                                                           | 2150.9431 | 87.62  | 0           |
| 8394252  | FSGNLLVSLGTWSDTSSGGPAR    | Sec61 alpha subunit homolog [Mus musculus]                                                          | 2322.1699 | 25.13  | 1.560862473 |
| 23943876 | FSHSGNQLDGPITAFR          | zymogen granule membrane protein 16 [Mus musculus]                                                  | 1746.8657 | 47.21  | 5.878906414 |
| 6671539  | FSNEEIAMATVTLR            | aldolase 1, A isoform [Mus musculus]                                                                | 1652.8352 | 108.14 | 1.276827659 |
| 6756085  | FSPGAPSGPGQPQNK           | zyxin [Mus musculus]                                                                                | 1565.7714 | 35.26  | 0           |
| 16716471 | FSPLMTAEGLTR              | hypothetical protein LOC94184 [Mus musculus]                                                        | 1379.7031 | 34.99  | 1.459602519 |
| 20070412 | FSPLTANLMLLAENGR          | ATP synthase, H+ transporting, mitochondrial F1 complex, O subunit [Mus musculus]                   | 1860.9705 | 26.69  | 0.921563576 |
| 28893559 | FSPPEETGPSR               | melanoma inhibitory activity 3 [Mus musculus]                                                       | 1203.5685 | 26.05  | 0           |
| 6677775  | FTLDCTHPVEDGIMDAANFEQLQER | ribosomal protein L22 [Mus musculus]                                                                | 3026.3447 | 25.41  | 1.413188542 |
| 31560560 | FTPGTFTNQIAAFR            | laminin receptor 1 (ribosomal protein SA) [Mus musculus]                                            | 1698.8551 | 34.81  | 1.320716203 |
| 31980648 | FTQAGSEVSALLGR            | ATP synthase, H+ transporting mitochondrial F1 complex, beta subunit [Mus musculus]                 | 1435.7585 | 86.57  | 0.933471019 |
| 31543605 | FVDHVFDEQVIDSLTVK         | ribophorin I [Mus musculus]                                                                         | 1991.0327 | 21.18  | 0           |
| 31982178 | FVEGLPINDFSR              | malate dehydrogenase 1, NAD (soluble) [Mus musculus]                                                | 1393.7114 | 68.05  | 1.078710674 |
| 31982186 | FVFLVDAMNGK               | malate dehydrogenase 2, NAD (mitochondrial) [Mus musculus]                                          | 1327.6658 | 70.48  | 0           |
| 21704144 | FVIGGPQGDAGLTR            | methionine adenosyltransferase II, alpha [Mus musculus]                                             | 1444.7562 | 25.34  | 2.918372307 |
| 6679687  | FVMQEEFSR                 | glucose regulated protein [Mus musculus]                                                            | 1172.5459 | 44.92  | 0.950517103 |
| 7305395  | FVSILMESIPLPDR            | purine-nucleoside phosphorylase [Mus musculus]                                                      | 1616.8751 | 24.63  | 14.00954336 |
| 6680606  | FVTSSSGSYGGVR             | keratin complex 1, acidic, gene 19 [Mus musculus]                                                   | 1303.6392 | 93.12  | 1.686630084 |
| 6754036  | FVTVQTISGTGALR            | glutamate oxaloacetate transaminase 2, mitochondrial [Mus musculus]                                 | 1449.8075 | 22.58  | 0           |
| 58037465 | FWYFVSQLK                 | Ribosomal protein L18A [Mus musculus]                                                               | 1217.6304 | 46.41  | 1.962981225 |
| 6678571  | FYPEDVAEELIQDITQK         | villin 2 [Mus musculus]                                                                             | 2037.9921 | 69.51  | 1.455822173 |
| 6754750  | FYPEDVSEELIQDITQR         | moesin [Mus musculus]                                                                               | 2082.0039 | 74.4   | 2.334053513 |
| 22122523 | FYQASTSELYGK              | GDP-mannose 4, 6-dehydratase [Mus musculus]                                                         | 1393.6591 | 51.1   | 2.543586428 |
| 33563266 | FYSVNVDSYK                | NADH dehydrogenase (ubiquinone) 1 alpha subcomplex, 4 [Mus musculus]                                | 1221.5776 | 42     | 1.420210072 |
| 6679937  | GAAQNIIPASTGAAK           | similar to glyceraldehyde-3-phosphate dehydrogenase [Mus musculus]                                  | 1369.7462 | 121.65 | 1.168063988 |
| 31981562 | GADFLVTEVENGGSLGSK        | pyruvate kinase 3 [Mus musculus]                                                                    | 1779.8737 | 88.41  | 0           |
| 6756033  | GAEAAVNTGPGGVPVQGSK       | nuclease sensitive element binding protein 1 [Mus musculus]                                         | 1695.8727 | 139.44 | 1.41888488  |
| 63746482 | GAGTGGGLGLAVEGPSEAK       | PREDICTED: filamin, alpha [Mus musculus]                                                            | 1570.8124 | 84.22  | 0.401705265 |
| 29293809 | GAIVPAQEVPPTVPMDSWAR      | ATP citrate lyase [Mus musculus]                                                                    | 2381.1978 | 63.01  | 2.716775482 |
| 7242197  | GAVYSFDPVGSYQR            | proteasome (prosome, macropain) subunit, beta type 1 [Mus musculus]                                 | 1545.7404 | 25.97  | 1.139158858 |
| 51764087 | GAWSNVLR                  | PREDICTED: solute carrier family 25 (mitochondrial carrier, adenine nucleotide translocator), membe | 902.477   | 29.11  | 0.913049183 |
| 22094075 | GAWSNVLR                  | solute carrier family 25, member 5 [Mus musculus]                                                   | 902.477   | 29.11  | 0.913049183 |
| 27229277 | GAYIYNTLMFIR              | threonyl-tRNA synthetase [Mus musculus]                                                             | 1590.7996 | 26.24  | 2.228866111 |
| 31982186 | GCDVVVIPAGVPR             | malate dehydrogenase 2, NAD (mitochondrial) [Mus musculus]                                          | 1281.7021 | 61.89  | 1.229477436 |
| 6679715  | GDATVSYEDPPTAK            | Ewing sarcoma breakpoint region 1 [Mus musculus]                                                    | 1450.6672 | 33.51  | 0           |
| 6753484  | GDEGEVGDPEGDNNDISPR       | procollagen, type VI, alpha 1 [Mus musculus]                                                        | 1971.8269 | 40.44  | 0           |
| 6753484  | GDEGPPGPEGLR              | procollagen, type VI, alpha 1 [Mus musculus]                                                        | 1180.5676 | 55.04  | 0           |
| 6679078  | GDFCIQVGR                 | nucleoside-diphosphate kinase 2 [Mus musculus]                                                      | 994.4791  | 33.1   | 0.905554158 |
| 6754206  | GDFIALDLGGSSFR            | hexokinase 1 [Mus musculus]                                                                         | 1454.7297 | 40.88  | 1.795079553 |
| 45597447 | GDGPVQGTIHFEQK            | superoxide dismutase 1, soluble [Mus musculus]                                                      | 1512.7618 | 66.2   | 0.547053797 |
| 30348966 | GDQVSQNLPAEQGSPR          | spectrin beta 2 isoform 1 [Mus musculus]                                                            | 1739.8374 | 46.57  | 1.185245673 |
| 7106421  | GDQVSQNLPAEQGSPR          | spectrin beta 2 isoform 2 [Mus musculus]                                                            | 1739.8374 | 46.57  | 1.185245673 |
| 31981562 | GDYPLEAVR                 | pyruvate kinase 3 [Mus musculus]                                                                    | 1019.5139 | 21.68  | 1.180701086 |
| 63660302 | GEAGIPAEFSIWTR            | PREDICTED: filamin B, beta [Mus musculus]                                                           | 1533.7715 | 44.51  | 1.498243305 |
| 6678986  | GEELLSPLNLEQAAYAR         | myosin IC [Mus musculus]                                                                            | 1873.9713 | 54.84  | 0.743354496 |
| 27370092 | GEETPVIVGSALCALEQR        | Tu translation elongation factor, mitochondrial [Mus musculus]                                      | 1871.9508 | 28.81  | 1.588853407 |
| 45504394 | GEFFNELVGGQQR             | integrin beta 1 (fibronectin receptor beta) [Mus musculus]                                          | 1423.6962 | 64.5   | 0.637955008 |

|          |                              |                                                                                                       |           |        |             |
|----------|------------------------------|-------------------------------------------------------------------------------------------------------|-----------|--------|-------------|
| 31982178 | GEFITTQQQR                   | malate dehydrogenase 1, NAD (soluble) [Mus musculus]                                                  | 1178.6257 | 44.71  | 1.273535544 |
| 54607098 | GEGGILINSQGER                | succinate dehydrogenase Fp subunit [Mus musculus]                                                     | 1329.6744 | 29.92  | 1.159775128 |
| 29336026 | GELEDLDSTNAQQELR             | nonmuscle myosin heavy chain [Mus musculus]                                                           | 1918.9053 | 28.95  | 2.407045798 |
| 6754524  | GEMMDLQHGSFLFK               | lactate dehydrogenase 1, A chain [Mus musculus]                                                       | 1605.7721 | 43.55  | 0           |
| 51592084 | GESEDDFWWCIDR                | hypothetical protein LOC74340 [Mus musculus]                                                          | 1657.6707 | 44.57  | 0.827774649 |
| 30841031 | GESLWLNLNR                   | myosin regulatory light chain interacting protein [Mus musculus]                                      | 1088.5666 | 22.44  | 0           |
| 34328108 | GETGPAGPAGPIGAGAR            | procollagen, type I, alpha 1 [Mus musculus]                                                           | 1532.7814 | 63.61  | 0           |
| 8393544  | GFAFVQYVNER                  | heterogeneous nuclear ribonucleoprotein C [Mus musculus]                                              | 1329.6608 | 32.49  | 2.016969218 |
| 21592285 | GFEVQVTELR                   | keratin 20 [Mus musculus]                                                                             | 1177.6224 | 33.49  | 0.667091254 |
| 40556608 | GFEVVMTEPIDEYCVQQLK          | heat shock protein 1, beta [Mus musculus]                                                             | 2391.1418 | 89.01  | 1.786392123 |
| 31560449 | GFFELFPSVSR                  | aspartyl aminopeptidase [Mus musculus]                                                                | 1285.6615 | 29.55  | 1.442771044 |
| 7304881  | GFFVQPTVFSNVTDEMR            | aldehyde dehydrogenase family 1, subfamily A1 [Mus musculus]                                          | 1973.9403 | 60.2   | 0           |
| 7106242  | GFFVQPTVFSNVTDEMR            | aldehyde dehydrogenase family 1, subfamily A7 [Mus musculus]                                          | 1973.9403 | 60.2   | 0           |
| 7949053  | GFGDGYNGYGGGGPGGNFGGSPGYGGGR | heterogeneous nuclear ribonucleoprotein A2/B1 isoform 1 [Mus musculus]                                | 2495.0337 | 140.84 | 1.665031687 |
| 6681069  | GFGFGQGAGALVHSE              | cysteine and glycine-rich protein 1 [Mus musculus]                                                    | 1433.6808 | 101.46 | 0.275936969 |
| 7949053  | GFGFVTFDDHDPVVK              | heterogeneous nuclear ribonucleoprotein A2/B1 isoform 1 [Mus musculus]                                | 1695.7732 | 67.74  | 3.387510017 |
| 7304885  | GFGTDEQAIIIDCLGSR            | annexin A11 [Mus musculus]                                                                            | 1681.7906 | 24.06  | 0           |
| 6680027  | GFIGPGIDVPAPDMSTGER          | glutamate dehydrogenase 1 [Mus musculus]                                                              | 1915.9385 | 58.13  | 0.908349051 |
| 27229277 | GFQEVVTPNIFNSR               | threonyl-tRNA synthetase [Mus musculus]                                                               | 1607.8324 | 19.5   | 0           |
| 24418933 | GGENIYPAELEDFFLK             | hypothetical protein LOC264895 [Mus musculus]                                                         | 1841.8999 | 81.3   | 0.772756539 |
| 6755252  | GGGGGGGGPGGEQETQELASK        | purine rich element binding protein B [Mus musculus]                                                  | 1829.8339 | 92.01  | 0.816876356 |
| 1346343  | GGGGGGYGGSSSYGSGGSGYGGGGGGGR | Keratin, type II cytoskeletal 1 (Cytokeratin 1) (K1) (CK 1) (67 kDa cytokekeratin) (Hair alpha protei | 2383.949  | 172.17 |             |
| 7949053  | GGGGNFGPGGPNFR               | heterogeneous nuclear ribonucleoprotein A2/B1 isoform 1 [Mus musculus]                                | 1377.6449 | 67.96  | 1.467575054 |
| 63476037 | GGPGQPFGEQEGTR               | PREDICTED: procollagen, type VI, alpha 3 [Mus musculus]                                               | 1473.6791 | 34.48  | 0.226030159 |
| 6680606  | GGFSFGTLAVSDGLLSGNEK         | keratin complex 1, acidic, gene 19 [Mus musculus]                                                     | 1895.9275 | 82.42  | 0           |
| 24418933 | GGVIAGSPAPPELIR              | hypothetical protein LOC264895 [Mus musculus]                                                         | 1433.8134 | 27     | 0.467687103 |
| 29789343 | GHPSAGAEEEGGSDGSAEAEP        | eukaryotic translation initiation factor 3, subunit 9 [Mus musculus]                                  | 2167.9275 | 94.96  | 0           |
| 22165384 | GHYTEGAELVDSVLDVVR           | tubulin, beta, 2 [Mus musculus]                                                                       | 1958.9843 | 138.11 | 0.910479029 |
| 33859488 | GHYTEGAELVDSVLDVVR           | tubulin, beta 2 [Mus musculus]                                                                        | 1958.9843 | 138.11 | 0.910479029 |
| 12963615 | GHYTEGAELVDSVLDVVR           | tubulin, beta 3 [Mus musculus]                                                                        | 1958.9843 | 138.11 | 0.910479029 |
| 7106439  | GHYTEGAELVDSVLDVVR           | tubulin, beta 5 [Mus musculus]                                                                        | 1958.9843 | 138.11 | 0.910479029 |
| 27754056 | GHYTEGAELVDSVLDVVR           | tubulin, beta 6 [Mus musculus]                                                                        | 1958.9843 | 138.11 | 0.910479029 |
| 21313262 | GIEQAVQSHAVAEER              | inner membrane protein, mitochondrial [Mus musculus]                                                  | 1823.899  | 49.29  | 0.825288117 |
| 21450291 | GILAADESVMGMNR               | aldolase 2, B isoform [Mus musculus]                                                                  | 1490.7351 | 27.94  | 0           |
| 63518159 | GILFVGGVSGGEEGAR             | PREDICTED: phosphogluconate dehydrogenase [Mus musculus]                                              | 1591.8136 | 24.63  | 1.743063783 |
| 31543942 | GILSGTSDLLLTFDEAEVR          | vinculin [Mus musculus]                                                                               | 2036.0466 | 37.97  | 0.632698853 |
| 6679457  | GINQGGVWIGGR                 | proteoglycan 2, bone marrow [Mus musculus]                                                            | 1284.6782 | 36.96  | 0.694872941 |
| 11230802 | GISQEQMQEFR                  | actinin alpha 4 [Mus musculus]                                                                        | 1352.6282 | 34.12  | 1.912816841 |
| 6681095  | GITWGEDTLMYLENPK             | cytochrome c, somatic [Mus musculus]                                                                  | 1995.9509 | 46.16  | 0           |
| 6756041  | GIVDQSQAYQEAFEISK            | tyrosine 3-monooxygenase/tryptophan 5-monooxygenase activation protein, zeta polypeptide [Mus muscu   | 2040.9849 | 19.16  | 0           |
| 51592084 | GIVEESVTGVHR                 | hypothetical protein LOC74340 [Mus musculus]                                                          | 1282.6765 | 19.09  | 0           |
| 23956084 | GIVNEQFLLQR                  | acyl-Coenzyme A dehydrogenase, very long chain [Mus musculus]                                         | 1316.7323 | 21.17  | 0.960054173 |
| 13386034 | GLAPDLPEDLYHLIK              | ribosomal protein S13 [Mus musculus]                                                                  | 1693.9014 | 40.31  | 3.57443504  |
| 36031080 | GLDGFQGGPSGR                 | procollagen, type IV, alpha 2 [Mus musculus]                                                          | 1187.5856 | 47.58  | 0.614733376 |
| 6754088  | GLELYLDLSSQPSR               | glutathione S-transferase, theta 2 [Mus musculus]                                                     | 1603.8621 | 21.73  | 0.937056669 |
| 6681069  | GLESTTLADKDGIEYCK            | cysteine and glycine-rich protein 1 [Mus musculus]                                                    | 1842.8889 | 74.11  | 0           |
| 46195430 | GLGMTLSYLFR                  | NADH dehydrogenase (ubiquinone) Fe-S protein 8 [Mus musculus]                                         | 1257.6625 | 29.9   | 0.851468969 |
| 7304889  | GLGTDEDAIIGILAYR             | annexin A4 [Mus musculus]                                                                             | 1676.8866 | 92.94  | 2.036757716 |
| 6753060  | GLGTDEDSILNLLTSR             | annexin A5 [Mus musculus]                                                                             | 1703.8824 | 80     | 1.122920076 |
| 6754570  | GLGTDEDTLIEITTR              | annexin A1 [Mus musculus]                                                                             | 1746.8997 | 69.98  | 2.331141637 |
| 31982159 | GLGTEVPNGFQGPDPYR            | hypothetical protein LOC235043 [Mus musculus]                                                         | 1803.8694 | 21.67  | 1.342486192 |
| 63557759 | GLHRDLHR                     | PREDICTED: similar to polytene protein [Mus musculus]                                                 | 1003.5535 | 19.39  | 0           |
| 40018610 | GLIEIISNAEYENIPRI            | U5 snRNP-specific protein, 200 kDa [Mus musculus]                                                     | 2015.0746 | 32.95  | 1.40438075  |
| 7948997  | GLIPGSLQNEPTASVPPQSDVYR      | PDZ and LIM domain 3 [Mus musculus]                                                                   | 2425.2322 | 79.73  | 0           |
| 6678329  | GLLIEPAANSYLLAER             | transglutaminase 2, C polypeptide [Mus musculus]                                                      | 1729.9486 | 34.57  | 0.831164694 |
| 31981826 | GLLPEELTPLILETQK             | electron transferring flavoprotein, alpha polypeptide [Mus musculus]                                  | 1794.0288 | 57     | 1.035027908 |
| 6671684  | GLNTIPLFVQLLYSPIENIQR        | catenin beta [Mus musculus]                                                                           | 2428.3616 | 24.42  | 2.7516677   |
| 13386034 | GLSQSALPYR                   | ribosomal protein S13 [Mus musculus]                                                                  | 1091.5825 | 28.11  | 1.381742125 |
| 63746482 | GLVEPVDVVDNADGTQTVNYVPSR     | PREDICTED: filamin, alpha [Mus musculus]                                                              | 2544.2571 | 139.33 | 0.261462206 |
| 13386272 | GLVYETSLVDPDEGIR             | citrate synthase-like protein [Mus musculus]                                                          | 1762.8804 | 64.66  | 1.923685599 |

|          |                         |                  |                                                                                                    |           |        |             |
|----------|-------------------------|------------------|----------------------------------------------------------------------------------------------------|-----------|--------|-------------|
| 13385942 | GLVYETSVLDPDEGIR        |                  | citrate synthase [Mus musculus]                                                                    | 1762.8804 | 64.66  | 1.923685599 |
| 6680748  | GMSLNLEPDNVGVVFGNDK     |                  | ATP synthase, H+ transporting, mitochondrial F1 complex, alpha subunit, isoform 1 [Mus musculus]   | 2104.0413 | 84.31  | 1.716645864 |
| 6680748  | GMSLNLEPDNVGVVFGNDK     |                  | ATP synthase, H+ transporting, mitochondrial F1 complex, alpha subunit, isoform 1 [Mus musculus]   | 2105.0454 | 42.74  | 0           |
| 31560611 | GMTVYGLPR               | Deamidation (NQ) | calponin 1 [Mus musculus]                                                                          | 993.5162  | 41.53  | 0.326264364 |
| 30911099 | GNAGQNTYGFANSTMER       |                  | fatty acid synthase [Mus musculus]                                                                 | 1817.7958 | 43.1   | 1.485444736 |
| 63492583 | GNFNYYEFTR              |                  | PREDICTED: myosin regulatory light polypeptide 9 [Mus musculus]                                    | 1246.5865 | 29.58  | 0           |
| 6754854  | GNLYWTDWNR              |                  | nidogen 1 [Mus musculus]                                                                           | 1324.6056 | 38.23  | 0           |
| 6679058  | GNLYWTDWNR              |                  | nidogen 2 [Mus musculus]                                                                           | 1324.6056 | 38.23  | 0           |
| 7305027  | GNPTVEVDLYTAK           |                  | enolase 2, gamma neuronal [Mus musculus]                                                           | 1406.7101 | 39.19  | 0           |
| 51770896 | GNPTVEVDLYTAK           |                  | PREDICTED: similar to Alpha enolase (2-phospho-D-glycerate hydro-lyase) (Non-neural enolase) (NNE) | 1406.7101 | 39.19  | 0           |
| 21704206 | GNWGYLDQAAALR           |                  | carboxylesterase 2 [Mus musculus]                                                                  | 1434.7161 | 23.52  | 0.43800941  |
| 19527034 | GPAPLGTGFQVTTTQQR       |                  | lamin B receptor [Mus musculus]                                                                    | 1569.8398 | 24.46  | 1.888300951 |
| 31560611 | GPAYGLSAEVK             |                  | calponin 1 [Mus musculus]                                                                          | 1091.574  | 87.14  | 0.202476735 |
| 6679573  | GPGLGSTQGQTIALPAQGLIEFR |                  | purine rich element binding protein A [Mus musculus]                                               | 2311.2407 | 23.06  | 0.98038931  |
| 6755204  | GPGLYVVDSEGNR           |                  | proteasome (prosome, macropain) subunit, beta type 5 [Mus musculus]                                | 1426.6697 | 21.84  | 0.981963952 |
| 33859600 | GPTEQLVSPPEPEVYEIVR     |                  | protein phosphatase 1B, magnesium dependent, beta isoform [Mus musculus]                           | 2042.0375 | 21.56  | 1.555260608 |
| 58037546 | GQETSTNPISAFWSR         |                  | isocitrate dehydrogenase 1 (NADP+), soluble [Mus musculus]                                         | 1864.9189 | 23.1   | 2.257023513 |
| 6677871  | GQIITYWQGANATR          |                  | scinderin [Mus musculus]                                                                           | 1578.7919 | 24.33  | 0.845300768 |
| 6755698  | GQNDLMGTAEDFADQFLR      |                  | surfeit gene 4 [Mus musculus]                                                                      | 2027.9158 | 88.16  | 1.437591231 |
| 27477057 | GQNLLLTNLQTIQGILER      |                  | translocated promoter region protein [Mus musculus]                                                | 2024.1432 | 21.08  | 2.548838361 |
| 6754090  | GSAPPGVPPEGQIR          |                  | glutathione S-transferase omega 1 [Mus musculus]                                                   | 1361.7245 | 36.1   | 1.680060512 |
| 16716467 | GSDHSASLEPGELAEIVR      |                  | N-acetylneuraminic acid synthase (sialic acid synthase) [Mus musculus]                             | 1866.9253 | 58.09  | 1.379640378 |
| 58037267 | GSFSEQGINEFLR           |                  | protein disulfide isomerase-associated 6 [Mus musculus]                                            | 1483.7219 | 44.49  | 0           |
| 6678573  | GSLNITTPGIQIWR          |                  | villin 1 [Mus musculus]                                                                            | 1555.8677 | 37.73  | 1.30648214  |
| 21704156 | GSVFSAPSASGTPNK         |                  | caldesmon 1 [Mus musculus]                                                                         | 1406.6941 | 91.47  | 0           |
| 6678449  | GSVNMPFMDFLTK           |                  | thiosulfate sulfurtransferase, mitochondrial [Mus musculus]                                        | 1486.7035 | 33.45  | 0           |
| 7657429  | GSYTYFAPSNEAWENLSDIR    |                  | osteoblast specific factor 2 (fasciclin I-like) [Mus musculus]                                     | 2435.083  | 50.7   | 0           |
| 22094075 | GTDIMYTGTLDCWR          |                  | solute carrier family 25, member 5 [Mus musculus]                                                  | 1631.7272 | 102.09 | 1.684122039 |
| 6754570  | GTDVNVFTTILTSR          |                  | annexin A1 [Mus musculus]                                                                          | 1523.8016 | 35.27  | 2.624261913 |
| 6679761  | GTGELTQLLNSMLTAIK       |                  | fructose biphosphatase 2 [Mus musculus]                                                            | 1789.9779 | 50.72  | 0.958734431 |
| 6753428  | GTGGVDTAATGVSFVDSNLDR   |                  | creatine kinase, mitochondrial 1, ubiquitous [Mus musculus]                                        | 2052.9922 | 73.81  | 5.395345596 |
| 6671762  | GTGGVDTAAVGAVFVDSNADR   |                  | creatine kinase, muscle [Mus musculus]                                                             | 1992.9625 | 46.86  | 0           |
| 10946574 | GTGGVDTAAVGGVDFVSNADR   |                  | creatine kinase, brain [Mus musculus]                                                              | 1964.9475 | 65.31  | 0.2289586   |
| 13385340 | GTGLDEAMEWLVLTK         |                  | ADP-ribosylation factor-like 1 [Mus musculus]                                                      | 1791.887  | 47.89  | 0           |
| 7304887  | GTGTDEDALIEILTR         |                  | annexin A3 [Mus musculus]                                                                          | 1704.8646 | 55.42  | 3.104978089 |
| 31560449 | GTPEPGPLGATDER          |                  | aspartyl aminopeptidase [Mus musculus]                                                             | 1396.6738 | 35.09  | 1.200683301 |
| 31981826 | GTSFEAAATSGGSASSEK      |                  | electron transferring flavoprotein, alpha polypeptide [Mus musculus]                               | 1644.7352 | 41.87  | 0           |
| 13384736 | GTVGEPTYDAEFQHFRLR      |                  | dynein, cytoplasmic, heavy chain 1 [Mus musculus]                                                  | 1966.9358 | 34.41  | 1.636600765 |
| 22164798 | GTWEKPGDAAPMGYDFWYQPR   |                  | selenium binding protein 1 [Mus musculus]                                                          | 2472.1167 | 33.51  | 1.356631847 |
| 63540743 | GVAGVPAEFSIWTR          |                  | PREDICTED: filamin C, gamma [Mus musculus]                                                         | 1489.7821 | 29.52  | 0.440199502 |
| 19526818 | GVAPLWMR                |                  | solute carrier family 25 (mitochondrial carrier, phosphate carrier), member 3 [Mus musculus]       | 929.4997  | 24.28  | 1.093614055 |
| 23956222 | GVDDLDFIGDEAIEKPTYATK   |                  | ARP3 actin-related protein 3 homolog [Mus musculus]                                                | 2444.2039 | 51.99  | 0           |
| 6754570  | GVDEATIIDLTK            |                  | annexin A1 [Mus musculus]                                                                          | 1387.7616 | 19.6   | 0           |
| 6996913  | GVDEVTIVNLTNR           |                  | annexin A2 [Mus musculus]                                                                          | 1542.8542 | 78.87  | 1.9999124   |
| 6677799  | GVDLQQLDMSYEQMLQYSAR    |                  | ribosomal protein S15 [Mus musculus]                                                               | 2588.2434 | 41.49  | 1.626201546 |
| 29789257 | GVDLQESNPASR            |                  | RAB5C, member RAS oncogene family [Mus musculus]                                                   | 1272.6223 | 31.11  | 1.073074526 |
| 13385374 | GVDLTEPAQPAR            |                  | RAB5A, member RAS oncogene family [Mus musculus]                                                   | 1253.6511 | 19.13  | 0           |
| 21450277 | GVGIIEGNETVEDIAAR       |                  | Na+/K+ -ATPase alpha 1 subunit [Mus musculus]                                                      | 1829.9302 | 94.6   | 1.107105915 |
| 63562740 | GVMLWGWR                |                  | PREDICTED: similar to secreted gel-forming mucin [Mus musculus]                                    | 1004.5128 | 21.73  | 0.710697662 |
| 6755863  | GVVDSDDLPLNVSR          |                  | tumor rejection antigen gp96 [Mus musculus]                                                        | 1485.7594 | 65.04  | 1.326045989 |
| 6754254  | GVVDSDELPLNISR          |                  | heat shock protein 1, alpha [Mus musculus]                                                         | 1513.7903 | 82.49  | 1.327038049 |
| 40556608 | GVVDSDELPLNISR          |                  | heat shock protein 1, beta [Mus musculus]                                                          | 1513.7903 | 82.49  | 1.327038049 |
| 6671539  | GVVPLAGTNGETTTQGLDGLSER |                  | aldolase 1, A isoform [Mus musculus]                                                               | 2272.1414 | 115.59 | 0.893457121 |
| 6753010  | GWGDQLIWTGTQYEEALYR     |                  | anterior gradient 2 [Mus musculus]                                                                 | 2229.0603 | 72.26  | 0.432893289 |
| 22122825 | GYAFNHSAFETVTR          |                  | actin-related protein 2 [Mus musculus]                                                             | 1613.7439 | 31.77  | 1.641090508 |
| 55742711 | GYDFPAVLR               |                  | EH-domain containing 2 [Mus musculus]                                                              | 1037.5353 | 32.28  | 0           |
| 7305085  | GVDVDFPR                |                  | glutamine fructose-6-phosphate transaminase 1 [Mus musculus]                                       | 968.4479  | 41.1   | 1.117551171 |
| 21450625 | GVDVIAQAQSGTGK          |                  | eukaryotic translation initiation factor 4A1 [Mus musculus]                                        | 1394.689  | 47.31  | 2.040991438 |
| 7305019  | GVDVIAQAQSGTGK          |                  | eukaryotic translation initiation factor 4A2 [Mus musculus]                                        | 1394.689  | 47.31  | 2.040991438 |
| 59709449 | GYEELLNEIR              |                  | actinin alpha 2 [Mus musculus]                                                                     | 1421.7146 | 59.45  | 0.821288475 |

|          |                        |                                                        |                                                                                                      |           |        |             |
|----------|------------------------|--------------------------------------------------------|------------------------------------------------------------------------------------------------------|-----------|--------|-------------|
| 11230802 | GYEELLNEIR             |                                                        | actinin alpha 4 [Mus musculus]                                                                       | 1421.7146 | 59.45  | 0.821288475 |
| 63487095 | GYELLFQPEVVR           |                                                        | PREDICTED: catenin src [Mus musculus]                                                                | 1449.7772 | 43.72  | 0           |
| 7949051  | GYFEYIEENK             |                                                        | heterogenous nuclear ribonucleoprotein U [Mus musculus]                                              | 1291.5931 | 25.7   | 0           |
| 6681069  | GYGYGQAGTLSTDK         |                                                        | cysteine and glycine-rich protein 1 [Mus musculus]                                                   | 1474.6962 | 74.26  | 0           |
| 6681069  | GYGYGQAGTLSTDKGESLGIK  |                                                        | cysteine and glycine-rich protein 1 [Mus musculus]                                                   | 2159.0701 | 153.65 | 0.40807393  |
| 30425250 | GYNFTTTAER             | Deamidation (NQ)                                       | hypothetical protein LOC238880 [Mus musculus]                                                        | 1160.5265 | 30.58  | 0           |
| 45598381 | GYPTLLLFR              |                                                        | thioredoxin domain containing 5 [Mus musculus]                                                       | 1079.6243 | 34.57  | 0.781232873 |
| 45598381 | GYPTLLWFR              |                                                        | thioredoxin domain containing 5 [Mus musculus]                                                       | 1152.6228 | 30.37  | 0.673396482 |
| 6671509  | GYSFTTTAER             |                                                        | actin, beta, cytoplasmic [Mus musculus]                                                              | 1132.542  | 58.73  | 1.383861354 |
| 63652452 | GYSFTTTAER             |                                                        | PREDICTED: similar to cytoplasmic beta-actin [Mus musculus]                                          | 1132.542  | 58.73  | 1.383861354 |
| 6671507  | GYSFVTTAER             |                                                        | actin, alpha 2, smooth muscle, aorta [Mus musculus]                                                  | 1130.564  | 50.55  | 0.240024121 |
| 6754524  | GYTSWAIGLSVADLAESIMK   |                                                        | lactate dehydrogenase 1, A chain [Mus musculus]                                                      | 2112.071  | 89.77  | 1.517049302 |
| 63664186 | GYTSWAIGLSVADLAESIMK   |                                                        | PREDICTED: similar to L-lactate dehydrogenase A chain (LDH-A) (LDH muscle subunit) (LDH-M) [Mus mus] | 2112.071  | 89.77  | 1.517049302 |
| 46849705 | GYVLP TAR              |                                                        | lectin, galactose binding, soluble 4 [Mus musculus]                                                  | 876.4898  | 23.48  | 1.871755216 |
| 31981549 | GYWGGPAFLR             |                                                        | sulfide quinone reductase-like [Mus musculus]                                                        | 1123.5647 | 23.7   | 1.360405082 |
| 7305295  | HESMISELEVR            |                                                        | myosin, heavy polypeptide 11, smooth muscle [Mus musculus]                                           | 1329.6395 | 34.18  | 0           |
| 9790219  | HEYQANGPEDLNR          |                                                        | destrin [Mus musculus]                                                                               | 1542.7146 | 25.79  | 0           |
| 9790219  | HEYQANGPEDLNR          | Deamidation (NQ)<br>Deamidation (NQ);<br>Oxidation (M) | destrin [Mus musculus]                                                                               | 1543.6989 | 23.5   | 0           |
| 63702717 | HGQWPQSSNEMVK          |                                                        | PREDICTED: hypothetical protein XP_619435 [Mus musculus]                                             | 1544.7081 | 35.79  | 1.050243831 |
| 22122825 | HIVLSGGSTMYPGLPSR      |                                                        | actin-related protein 2 [Mus musculus]                                                               | 1771.9249 | 30.95  | 2.307011928 |
| 6753010  | HLSPDGQYVPR            |                                                        | anterior gradient 2 [Mus musculus]                                                                   | 1268.6444 | 63.32  | 0.475037336 |
| 6671507  | HQGVMMVMGMQK           |                                                        | actin, alpha 2, smooth muscle, aorta [Mus musculus]                                                  | 1171.5741 | 55.09  | 0.609057385 |
| 6671509  | HQGVMMVMGMQK           |                                                        | actin, beta, cytoplasmic [Mus musculus]                                                              | 1171.5741 | 55.09  | 0.609057385 |
| 30425250 | HQGVMMVMGMQK           |                                                        | hypothetical protein LOC238880 [Mus musculus]                                                        | 1171.5741 | 55.09  | 0.609057385 |
| 46559834 | HQLVEVIGQLEETLPER      |                                                        | desmuslin isoform M [Mus musculus]                                                                   | 1990.0543 | 24.16  | 0           |
| 63746482 | HTAMVSWGVSIPNSPFR      |                                                        | PREDICTED: filamin, alpha [Mus musculus]                                                             | 1942.9659 | 47.3   | 0           |
| 10946928 | HTGPNSPDTANDGFVR       |                                                        | heterogeneous nuclear ribonucleoprotein H1 [Mus musculus]                                            | 1684.7762 | 42.85  | 2.280533776 |
| 9845253  | HTGPNSPDTANDGFVR       |                                                        | heterogeneous nuclear ribonucleoprotein H2 [Mus musculus]                                            | 1684.7762 | 42.85  | 2.280533776 |
| 7305295  | HTQAVEELTEQLQFK        |                                                        | myosin, heavy polypeptide 11, smooth muscle [Mus musculus]                                           | 1929.9614 | 123.01 | 0.256685328 |
| 6678413  | HVFGESDELIGQK          |                                                        | triosephosphate isomerase 1 [Mus musculus]                                                           | 1458.7261 | 74.66  | 0           |
| 27229048 | HVSPAGAAVGVPLSEDEAR    |                                                        | 5-aminoimidazole-4-carboxamide ribonucleotide formyltransferase/IMP cyclohydrolase [Mus musculus]    | 1861.9432 | 19.76  | 1.367366663 |
| 7305295  | HVSTLNIQLSDSK          |                                                        | myosin, heavy polypeptide 11, smooth muscle [Mus musculus]                                           | 1441.7648 | 83.88  | 0.335903111 |
| 28916693 | HVVPNEVVVQR            |                                                        | gelsolin [Mus musculus]                                                                              | 1275.7188 | 45.27  | 1.327025553 |
| 63487095 | HYEDGYPGGSDNYGSLSR     |                                                        | PREDICTED: catenin src [Mus musculus]                                                                | 1973.8328 | 57.45  | 2.227686883 |
| 6754036  | IAATILTSPDLR           |                                                        | glutamate oxaloacetate transaminase 2, mitochondrial [Mus musculus]                                  | 1270.7347 | 30.59  | 0           |
| 18250284 | IAEFAFEYAR             |                                                        | isocitrate dehydrogenase 3 (NAD+) alpha [Mus musculus]                                               | 1216.6051 | 21.25  | 1.012780212 |
| 63476037 | IAEGVPQLLIVLTAEPSGDDVR |                                                        | PREDICTED: procollagen, type VI, alpha 3 [Mus musculus]                                              | 2292.2402 | 116.64 | 0.215314937 |
| 31981515 | IALTDNSLIAR            |                                                        | ribosomal protein L7 [Mus musculus]                                                                  | 1186.6775 | 27.26  | 0           |
| 63746482 | IANLQTDLSGGLR          |                                                        | PREDICTED: filamin, alpha [Mus musculus]                                                             | 1415.7516 | 62.78  | 0.302622749 |
| 18700004 | IAQFLSGIPETVPLSTVNR    |                                                        | acetyl-Coenzyme A acyltransferase 1 [Mus musculus]                                                   | 2042.1276 | 23.79  | 0.927329397 |
| 7305295  | IAQLEEELEEEQGNMEAMSDR  |                                                        | myosin, heavy polypeptide 11, smooth muscle [Mus musculus]                                           | 2451.0833 | 102.39 | 0.181894707 |
| 20137006 | IAQLEEQLDNETK          |                                                        | myosin, heavy polypeptide 9, non-muscle [Mus musculus]                                               | 1530.78   | 19.27  | 0           |
| 7305295  | IAQLEEQVEQEAR          |                                                        | myosin, heavy polypeptide 11, smooth muscle [Mus musculus]                                           | 1542.7889 | 91.97  | 0.211043362 |
| 41054806 | IAQSDYIPTQQDVLR        |                                                        | guanine nucleotide binding protein, alpha inhibiting 2 [Mus musculus]                                | 1746.907  | 79.81  | 1.095170475 |
| 13385010 | IASGLGLAWIIGR          |                                                        | microsomal glutathione S-transferase 3 [Mus musculus]                                                | 1326.79   | 26.76  | 1.075974601 |
| 21704020 | IASQVAALDLGYKPGVEAIR   |                                                        | NADH dehydrogenase (ubiquinone) Fe-S protein 1 [Mus musculus]                                        | 2071.1638 | 52.62  | 1.274449139 |
| 36031080 | IAVQPGLTGPQGR          |                                                        | procollagen, type IV, alpha 2 [Mus musculus]                                                         | 1293.7355 | 43.91  | 0           |
| 13384620 | IDEPLEGSER             |                                                        | heterogeneous nuclear ribonucleoprotein K [Mus musculus]                                             | 1259.5787 | 50.67  | 1.357678159 |
| 6680854  | IDFEDVIAEPEGTHSFDGIWK  |                                                        | caveolin, caveolae protein 1 [Mus musculus]                                                          | 2405.1548 | 54.52  | 0.825315901 |
| 33469063 | IDFEKEPLGVNAQGR        |                                                        | aconitase 1 [Mus musculus]                                                                           | 1672.8668 | 35.41  | 0           |
| 40556608 | IDIIPNQR               |                                                        | heat shock protein 1, beta [Mus musculus]                                                            | 1194.6541 | 44.31  | 1.508819351 |
| 31980969 | IDMNLTDLLGELQR         |                                                        | SEC23B [Mus musculus]                                                                                | 1630.8514 | 67.05  | 1.120774411 |
| 6680836  | IDNSQVESGSLEDDWDFLPPKK |                                                        | calreticulin [Mus musculus]                                                                          | 2519.1885 | 19.83  | 1.317019    |
| 9790073  | IDSVTGEIFSAAPLDR       |                                                        | cadherin 17 [Mus musculus]                                                                           | 1690.8661 | 59.04  | 1.567230265 |
| 7949053  | IDTIEITDR              |                                                        | heterogeneous nuclear ribonucleoprotein A2/B1 isoform 1 [Mus musculus]                               | 1188.6437 | 40.04  | 1.445553652 |
| 63476037 | IEDNVQQFLVLLVAGR       |                                                        | PREDICTED: procollagen, type VI, alpha 3 [Mus musculus]                                              | 1814.0165 | 84.8   | 0.228480984 |
| 31981100 | IEDVTPIPSDSTR          |                                                        | ribosomal protein S14 [Mus musculus]                                                                 | 1429.7244 | 50.57  | 1.983629986 |
| 63476037 | IEEGVPQFLVLISSGK       |                                                        | PREDICTED: procollagen, type VI, alpha 3 [Mus musculus]                                              | 1715.9624 | 52.97  | 0.586622483 |
| 6680606  | IEELNTQVAVHSEIQISK     |                                                        | keratin complex 1, acidic, gene 19 [Mus musculus]                                                    | 2166.1511 | 129.15 | 1.558720628 |
| 37620153 | IEGYDPPEVVWFK          |                                                        | myosin, light polypeptide kinase telokin isoform [Mus musculus]                                      | 1578.7845 | 59.69  | 0.193695069 |

|          |                         |                    |                                                                                                     |           |        |             |
|----------|-------------------------|--------------------|-----------------------------------------------------------------------------------------------------|-----------|--------|-------------|
| 33563250 | IESLNEEIAFLK            |                    | desmin [Mus musculus]                                                                               | 1405.7555 | 81     | 0.20833577  |
| 31559916 | IETIEVMEDR              |                    | heterogeneous nuclear ribonucleoprotein A3 isoform b [Mus musculus]                                 | 1234.6006 | 26.01  | 1.15495478  |
| 31981722 | IEWLESHQDADIEDFK        |                    | heat shock 70kD protein 5 (glucose-regulated protein) [Mus musculus]                                | 1974.9243 | 55.88  | 2.691799637 |
| 14861854 | IFEAQIAGLR              |                    | keratin complex 2, basic, gene 7 [Mus musculus]                                                     | 1117.6359 | 28.54  | 1.548194061 |
| 6679421  | IFELGLGDDDDGNLEEDFITWR  |                    | P450 (cytochrome) oxidoreductase [Mus musculus]                                                     | 2454.1577 | 39.07  | 0           |
| 31982186 | IFGVTTLDIVR             |                    | malate dehydrogenase 2, NAD (mitochondrial) [Mus musculus]                                          | 1233.7216 | 49.33  | 1.103667256 |
| 31559916 | IFVGGIKEDTEEYNLR        |                    | heterogeneous nuclear ribonucleoprotein A3 isoform b [Mus musculus]                                 | 1882.9569 | 73.05  | 1.389487969 |
| 22164798 | IFVVDWQR                |                    | selenium binding protein 1 [Mus musculus]                                                           | 1149.5801 | 41.41  | 1.162246912 |
| 31982522 | IGCFALSEPGNGSDAGAASTTAR |                    | acyl-Coenzyme A dehydrogenase, short chain [Mus musculus]                                           | 2152.9927 | 78.4   | 0.780300116 |
| 63476037 | IGDLQSQIVSLLK           |                    | PREDICTED: procollagen, type VI, alpha 3 [Mus musculus]                                             | 1413.8307 | 75.79  | 0           |
| 24418919 | IGEGFLTDLSQLK           |                    | brain glycogen phosphorylase [Mus musculus]                                                         | 1420.7715 | 64.07  | 0           |
| 6671539  | IGEHTPSALAIMENANVLAR    |                    | aldolase 1, A isoform [Mus musculus]                                                                | 2107.0955 | 98.49  | 0.846628876 |
| 6754750  | IGFPWSEIR               |                    | moesin [Mus musculus]                                                                               | 1104.5795 | 40.11  | 1.361679705 |
| 6678571  | IGFPWSEIR               |                    | villin 2 [Mus musculus]                                                                             | 1104.5795 | 40.11  | 1.361679705 |
| 51873060 | IGGIGTVPVGR             |                    | eukaryotic translation elongation factor 1 alpha 1 [Mus musculus]                                   | 1025.6167 | 39.65  | 1.180814833 |
| 63660294 | IGNLQDTLSDGLR           |                    | PREDICTED: similar to Filamin B (FLN-B) (Beta-filamin) (Actin-binding like protein) (ABP-280-like p | 1401.7314 | 23.62  | 1.675430731 |
| 63476037 | IGVVQFSNDVFPPEFYLK      |                    | PREDICTED: procollagen, type VI, alpha 3 [Mus musculus]                                             | 2002.0211 | 44.29  | 0.334017224 |
| 6754976  | IGYPAPNFK               |                    | peroxiredoxin 1 [Mus musculus]                                                                      | 1006.531  | 33.89  | 1.396351576 |
| 7106242  | IHGQTIPSDGNIFTYTR       | Deamidation (NQ)   | aldehyde dehydrogenase family 1, subfamily A7 [Mus musculus]                                        | 1920.921  | 24.84  | 0           |
| 6680027  | IIAEGANGPTTPEADK        |                    | glutamate dehydrogenase 1 [Mus musculus]                                                            | 1583.796  | 72.31  | 0.768056515 |
| 6680027  | IIAEGANGPTTPEADKIFLER   |                    | glutamate dehydrogenase 1 [Mus musculus]                                                            | 2242.1641 | 43.77  | 1.605073142 |
| 6671507  | IIAPPER                 |                    | actin, alpha 2, smooth muscle, aorta [Mus musculus]                                                 | 795.4681  | 24.6   | 0.414279911 |
| 6671509  | IIAPPER                 |                    | actin, beta, cytoplasmic [Mus musculus]                                                             | 795.4681  | 24.6   | 0.414279911 |
| 30425250 | IIAPPER                 |                    | hypothetical protein LOC238880 [Mus musculus]                                                       | 795.4681  | 24.6   | 0.414279911 |
| 63652452 | IIAPPER                 |                    | PREDICTED: similar to cytoplasmic beta-actin [Mus musculus]                                         | 795.4681  | 24.6   | 0.414279911 |
| 37620153 | IIDEDFELTER             |                    | myosin, light polypeptide kinase telokin isoform [Mus musculus]                                     | 1379.6631 | 50.75  | 0           |
| 30425168 | IIDFGLAR                |                    | myosin light chain kinase [Mus musculus]                                                            | 904.5195  | 23.72  | 0.223310263 |
| 6677813  | IIDVVYNASNELVR          |                    | ribosomal protein S8 [Mus musculus]                                                                 | 1718.9178 | 97.24  | 1.463052836 |
| 63476037 | IIEELDVKPDGTR           |                    | PREDICTED: procollagen, type VI, alpha 3 [Mus musculus]                                             | 1484.8046 | 47.2   | 0.553389032 |
| 6679567  | IIGAVDQIQLTQAQLEER      |                    | polymerase I and transcript release factor [Mus musculus]                                           | 2025.0945 | 89.02  | 0.424458539 |
| 20137006 | IIGLDQVAGMSETALPGAFAK   |                    | myosin, heavy polypeptide 9, non-muscle [Mus musculus]                                              | 2018.0645 | 68.66  | 1.823457752 |
| 13384620 | IILDLISEPIK             |                    | heterogeneous nuclear ribonucleoprotein K [Mus musculus]                                            | 1340.7999 | 78.27  | 1.707979814 |
| 6679891  | IILTAQPF                |                    | alpha glucosidase 2 alpha neutral subunit [Mus musculus]                                            | 1058.6333 | 22.96  | 1.409647476 |
| 31981722 | IINEPTAAAIAYGLDK        |                    | heat shock 70kD protein 5 (glucose-regulated protein) [Mus musculus]                                | 1659.9032 | 94.75  | 1.08032625  |
| 7305163  | IINEPTAAAIAYGLDK        |                    | heat shock protein 1-like [Mus musculus]                                                            | 1659.9032 | 94.75  | 1.08032625  |
| 31981690 | IINEPTAAAIAYGLDK        |                    | heat shock protein 8 [Mus musculus]                                                                 | 1659.9032 | 94.75  | 1.08032625  |
| 63664182 | IINEPTAAAIAYGLDK        |                    | PREDICTED: similar to heat shock protein 8 [Mus musculus]                                           | 1659.9032 | 94.75  | 1.08032625  |
| 63704924 | IINEPTAAAIAYGLDR        |                    | PREDICTED: heat shock protein 1B [Mus musculus]                                                     | 1687.9041 | 43.9   | 0.532618912 |
| 6679439  | IIPGFMCQGGDFTR          |                    | peptidylprolyl isomerase A [Mus musculus]                                                           | 1541.7198 | 66.6   | 1.643080766 |
| 41322904 | IISLETYNLFR             |                    | plectin 1 isoform 1 [Mus musculus]                                                                  | 1368.7571 | 24.26  | 0.886194169 |
| 136429   | IITHPNFNGNTLNDNDIMLIK   |                    | Trypsin precursor                                                                                   | 2283.1956 | 156.72 | 10.96802705 |
| 136429   | IITHPNFNGNTLNDNDIMLIK   | 2 Deamidation (NQ) | Trypsin precursor                                                                                   | 2285.176  | 32.63  | 0           |
| 136429   | IITHPNFNGNTLNDNDIMLIK   | Deamidation (NQ)   | Trypsin precursor                                                                                   | 2284.1716 | 58.15  | 0.316558595 |
| 136429   | IITHPNFNGNTLNDNDIMLIK   | Oxidation (M)      | Trypsin precursor                                                                                   | 2299.1785 | 87.67  | 0           |
| 13384620 | IITITGTQDQIQNAQYLLQNSVK |                    | heterogeneous nuclear ribonucleoprotein K [Mus musculus]                                            | 2589.3984 | 22.94  | 0           |
| 6680960  | IISPTVGDPIDEYTTVPGR     |                    | procollagen, type XII, alpha 1 [Mus musculus]                                                       | 2193.1108 | 66.91  | 0           |
| 6678359  | ILATPPQEDAPSVDIANIR     |                    | transketolase [Mus musculus]                                                                        | 2020.0782 | 67.4   | 1.398268584 |
| 42415475 | ILFIDSDHTDNQR           |                    | prolyl 4-hydroxylase, beta polypeptide [Mus musculus]                                               | 1833.9088 | 38.18  | 0           |
| 6680748  | ILGADTSVDLEETGR         |                    | ATP synthase, H+ transporting, mitochondrial F1 complex, alpha subunit, isoform 1 [Mus musculus]    | 1575.7994 | 91.73  | 0.739608483 |
| 31982755 | ILLAELEQLK              |                    | vimentin [Mus musculus]                                                                             | 1169.7062 | 73.64  | 0.57975111  |
| 6680067  | ILLANFLAQTEALMK         |                    | glucose phosphate isomerase 1 [Mus musculus]                                                        | 1675.9374 | 67.24  | 1.274052846 |
| 46195430 | ILMWTELIR               |                    | NADH dehydrogenase (ubiquinone) Fe-S protein 8 [Mus musculus]                                       | 1174.6627 | 26.89  | 0.995916781 |
| 51827543 | ILPEIPILEEGLR           |                    | PREDICTED: GCN1 general control of amino-acid synthesis 1-like 1 [Mus musculus]                     | 1604.9644 | 34.04  | 0           |
| 16716471 | ILSDTTLWLR              |                    | hypothetical protein LOC94184 [Mus musculus]                                                        | 1217.6884 | 29.12  | 1.051331958 |
| 6677771  | ILTFDQLALESPK           |                    | ribosomal protein L18 [Mus musculus]                                                                | 1474.8085 | 51.24  | 1.395527183 |
| 9790069  | ILVATNLFGFR             |                    | HLA-B-associated transcript 1A [Mus musculus]                                                       | 1103.6532 | 38.32  | 1.616827506 |
| 34538601 | ILYMMDEINNPVLTVK        |                    | cytochrome c oxidase subunit II [Mus musculus]                                                      | 1892.9801 | 47.53  | 0           |
| 31980648 | IMDPNIVGNEHYDVAR        |                    | ATP synthase, H+ transporting mitochondrial F1 complex, beta subunit [Mus musculus]                 | 1842.8911 | 66.36  | 1.188007857 |
| 18152793 | IMEGPAFNFLDAPAVR        |                    | pyruvate dehydrogenase (lipoamide) beta [Mus musculus]                                              | 1747.8914 | 27.97  | 1.012455984 |
| 20137006 | IMGPEDEQMGLLR           |                    | myosin, heavy polypeptide 9, non-muscle [Mus musculus]                                              | 1601.8022 | 45.9   | 2.21707494  |

|          |                                |                  |                                                                                              |           |        |             |
|----------|--------------------------------|------------------|----------------------------------------------------------------------------------------------|-----------|--------|-------------|
| 31980648 | IMNVIGEPIDER                   |                  | ATP synthase, H+ transporting mitochondrial F1 complex, beta subunit [Mus musculus]          | 1385.7208 | 48.11  | 0           |
| 6724311  | INEAFDLLR                      |                  | alcohol dehydrogenase 1 (class I) [Mus musculus]                                             | 1090.5875 | 65.24  | 6.19549282  |
| 51772556 | INFDDNAEFR                     |                  | PREDICTED: similar to Succinate-Coenzyme A ligase, GDP-forming, beta subunit [Mus musculus]  | 1240.564  | 43.6   | 1.280612394 |
| 33598964 | INFVDTGYIVGANIETYLLEK          |                  | myosin heavy chain 10, non-muscle [Mus musculus]                                             | 2372.2349 | 124.01 | 0.786177567 |
| 7305295  | INFVDTGYIVGANIETYLLEK          |                  | myosin, heavy polypeptide 11, smooth muscle [Mus musculus]                                   | 2372.2349 | 124.01 | 0.786177567 |
| 6754994  | INISEGNCPER                    |                  | poly(rC) binding protein 1 [Mus musculus]                                                    | 1231.576  | 19.35  | 1.418558736 |
| 33563250 | INLPIQTFALSALNFR               |                  | desmin [Mus musculus]                                                                        | 1633.9108 | 73.54  | 0.184409824 |
| 33563250 | INLPIQTFALSALNFR               | Deamidation (NQ) | desmin [Mus musculus]                                                                        | 1634.8915 | 44.84  | 0           |
| 9903607  | INPDGQSQVVEVPYAR               |                  | transmembrane protein 4 [Mus musculus]                                                       | 1730.8746 | 23.09  | 0           |
| 27804325 | INVLVLEAR                      |                  | monoamine oxidase A [Mus musculus]                                                           | 1026.6277 | 26.95  | 1.171763828 |
| 21704066 | INVNEIFYDLVR                   |                  | RAS-related protein-1a [Mus musculus]                                                        | 1494.7955 | 73.91  | 0.833511867 |
| 33859488 | INVYYNEAAGNK                   |                  | tubulin, beta 2 [Mus musculus]                                                               | 1355.6835 | 40.78  | 0           |
| 22165384 | INVYYNEATGGK                   |                  | tubulin, beta, 2 [Mus musculus]                                                              | 1328.6516 | 34.73  | 5.214574617 |
| 31980648 | IPSAVGYQPTLATDMGTMQER          |                  | ATP synthase, H+ transporting mitochondrial F1 complex, beta subunit [Mus musculus]          | 2266.0911 | 109.4  | 1.426023409 |
| 20137008 | IQAIELEDLLR                    |                  | biglycan [Mus musculus]                                                                      | 1312.748  | 46.94  | 0.734569881 |
| 46593021 | IQEVDAQMLLR                    |                  | ubiquinol-cytochrome c reductase core protein 1 [Mus musculus]                               | 1202.6154 | 47.87  | 0.919031284 |
| 6753498  | IQFNESFAEMNR                   |                  | cytochrome c oxidase subunit IV isoform 1 [Mus musculus]                                     | 1485.6836 | 53.26  | 1.676661748 |
| 31559981 | IQIWDTAGQER                    |                  | RAB15, member RAS oncogene family [Mus musculus]                                             | 1316.666  | 77.54  | 1.578773833 |
| 21314832 | IQRPPEDSIQPYEK                 |                  | UDP-glucose pyrophosphorylase 2 [Mus musculus]                                               | 1699.874  | 38.38  | 0.571729621 |
| 19526818 | IQTQPGYANTLR                   |                  | solute carrier family 25 (mitochondrial carrier, phosphate carrier), member 3 [Mus musculus] | 1361.7268 | 54.59  | 1.18798004  |
| 31981246 | IQTYLESTKPIIDLVEEMGK           |                  | UMP-CMP kinase [Mus musculus]                                                                | 2371.2136 | 69.53  | 1.390473065 |
| 63476037 | ISCSGNQLPTVVR                  |                  | PREDICTED: procollagen, type VI, alpha 3 [Mus musculus]                                      | 1274.6555 | 28.35  | 0           |
| 22165384 | ISEQFTAMFR                     |                  | tubulin, beta, 2 [Mus musculus]                                                              | 1229.6042 | 54.56  | 0.918390119 |
| 33859488 | ISEQFTAMFR                     |                  | tubulin, beta 2 [Mus musculus]                                                               | 1229.6042 | 54.56  | 0.918390119 |
| 12963615 | ISEQFTAMFR                     |                  | tubulin, beta 3 [Mus musculus]                                                               | 1229.6042 | 54.56  | 0.918390119 |
| 31981939 | ISEQFTAMFR                     |                  | tubulin, beta 4 [Mus musculus]                                                               | 1229.6042 | 54.56  | 0.918390119 |
| 7106439  | ISEQFTAMFR                     |                  | tubulin, beta 5 [Mus musculus]                                                               | 1229.6042 | 54.56  | 0.918390119 |
| 22122523 | ISFDLAEYTDVGVGTLR              |                  | GDP-mannose 4, 6-dehydratase [Mus musculus]                                                  | 2042.0118 | 84.91  | 0.87138893  |
| 51491845 | ISGETIFVTAPHEATAGIIVNR         |                  | clathrin, heavy polypeptide (Hc) [Mus musculus]                                              | 2353.2495 | 32.55  | 1.237155805 |
| 21361209 | ISGLIYEETR                     |                  | germinal histone H4 [Mus musculus]                                                           | 1180.6256 | 63.59  | 1.300645282 |
| 31982755 | ISLPLPTFSSLNLR                 |                  | vimentin [Mus musculus]                                                                      | 1557.9076 | 79.54  | 0.808475559 |
| 63476037 | ISLSPEVYVSVSTFR                |                  | PREDICTED: procollagen, type VI, alpha 3 [Mus musculus]                                      | 1747.8966 | 46.03  | 0.254187918 |
| 33563256 | ISQNTNYIPTQQDVLRL              |                  | guanine nucleotide binding protein, alpha inhibiting 3 [Mus musculus]                        | 1775.9346 | 23.83  | 1.363130611 |
| 6678499  | ISSINSISALCEATGADVEEVATAIGMDQR |                  | UDP-glucose dehydrogenase [Mus musculus]                                                     | 3051.4509 | 94.82  | 0.483793636 |
| 6677813  | ISSLLEEQQFQGGK                 |                  | ribosomal protein S8 [Mus musculus]                                                          | 1506.7754 | 72.97  | 1.727523307 |
| 31981679 | ISSVQSIVPALEIANHR              |                  | heat shock protein 1 (chaperonin) [Mus musculus]                                             | 1905.0566 | 31.68  | 1.347833718 |
| 6753320  | ISTPVDVNNR                     |                  | chaperonin subunit 3 (gamma) [Mus musculus]                                                  | 1114.5864 | 22.2   | 1.700683234 |
| 40254595 | ISVGSADLVIWDPDSVK              |                  | dihydropyrimidinase-like 2 [Mus musculus]                                                    | 1915.9398 | 22.51  | 0           |
| 7106439  | ISVYYNEATGGK                   |                  | tubulin, beta 5 [Mus musculus]                                                               | 1301.6398 | 84.8   | 1.657882387 |
| 7106435  | ITAQQGYELR                     |                  | tenascin C [Mus musculus]                                                                    | 1178.6127 | 21.16  | 0.567197365 |
| 31982522 | ITEIYEGTSEIQR                  |                  | acyl-Coenzyme A dehydrogenase, short chain [Mus musculus]                                    | 1538.7709 | 67.33  | 0.756935917 |
| 50355692 | ITESEEVVSR                     |                  | lamin A isoform A [Mus musculus]                                                             | 1148.5828 | 22.9   | 0           |
| 12963691 | ITGWGEETLPDGR                  |                  | tubulointerstitial nephritis antigen-like [Mus musculus]                                     | 1430.6989 | 24.87  | 0           |
| 6679291  | ITLPVDFVTADKFDENAK             |                  | phosphoglycerate kinase 1 [Mus musculus]                                                     | 2023.0356 | 69.19  | 1.625497216 |
| 6680606  | ITMQNLNDR                      |                  | keratin complex 1, acidic, gene 19 [Mus musculus]                                            | 1104.5466 | 48.91  | 1.43859135  |
| 34328204 | ITPAHQNDYEVGQR                 |                  | valyl-tRNA synthetase 2 [Mus musculus]                                                       | 1742.8192 | 64.59  | 1.043385486 |
| 31981722 | ITPSYVAFTPEGER                 |                  | heat shock 70kD protein 5 (glucose-regulated protein) [Mus musculus]                         | 1566.7847 | 62.65  | 1.086686489 |
| 9790073  | ITQVQWNDPGAQYSLVNK             |                  | cadherin 17 [Mus musculus]                                                                   | 2061.0557 | 44.57  | 0           |
| 6680960  | ITYQPSTGEGNEQTITVGGR           |                  | procollagen, type XII, alpha 1 [Mus musculus]                                                | 2108.0339 | 76.81  | 0           |
| 21450277 | IVEIPFNSTNK                    |                  | Na+/K+ -ATPase alpha 1 subunit [Mus musculus]                                                | 1261.6687 | 28.97  | 1.007978272 |
| 63476037 | IVEYLDIGFDITTR                 |                  | PREDICTED: procollagen, type VI, alpha 3 [Mus musculus]                                      | 1541.7887 | 80.03  | 0.201376834 |
| 33598964 | IVFQEFR                        |                  | myosin heavy chain 10, non-muscle [Mus musculus]                                             | 938.5127  | 35.14  | 0.205642308 |
| 7305295  | IVFQEFR                        |                  | myosin, heavy polypeptide 11, smooth muscle [Mus musculus]                                   | 938.5127  | 35.14  | 0.205642308 |
| 6753010  | IVFVDPSTLTVR                   |                  | anterior gradient 2 [Mus musculus]                                                           | 1245.7229 | 64.91  | 0.452175912 |
| 7305619  | IVLPDYLEIAR                    |                  | ubiquitin specific protease 5 (isopeptidase T) [Mus musculus]                                | 1414.8322 | 25.23  | 1.326880697 |
| 33859580 | IVLDFR                         |                  | galectin-3 [Mus musculus]                                                                    | 762.442   | 39.37  | 0           |
| 40254595 | IVLEDGTLHVTEGSGR               |                  | dihydropyrimidinase-like 2 [Mus musculus]                                                    | 1682.8696 | 65     | 0           |
| 6754482  | IVLQIDNAR                      |                  | keratin complex 1, acidic, gene 18 [Mus musculus]                                            | 1041.6035 | 33.68  | 1.5072317   |
| 6680606  | IVLQIDNAR                      |                  | keratin complex 1, acidic, gene 19 [Mus musculus]                                            | 1041.6035 | 33.68  | 1.5072317   |
| 417200   | IVLQIDNAR                      |                  | Keratin, type I cytoskeletal 19 (Cytokeratin 19) (K19) (CK 19)                               | 1041.6035 | 33.68  | 1.5072317   |

|          |                          |                    |                                                                                                    |           |        |             |
|----------|--------------------------|--------------------|----------------------------------------------------------------------------------------------------|-----------|--------|-------------|
| 24418919 | IVNGWQVEEADDWLR          |                    | brain glycogen phosphorylase [Mus musculus]                                                        | 1829.8788 | 47.09  | 0.947455659 |
| 31981246 | IVPVEITISLLK             |                    | UMP-CMP kinase [Mus musculus]                                                                      | 1324.8466 | 66.38  | 1.121362811 |
| 6679937  | IVSNASCTTNCLAPLAK        |                    | similar to glyceraldehyde-3-phosphate dehydrogenase [Mus musculus]                                 | 1705.8606 | 80.28  | 1.275004977 |
| 6679937  | IVSNASCTTNCLAPLAK        | Deamidation (NQ)   | similar to glyceraldehyde-3-phosphate dehydrogenase [Mus musculus]                                 | 1706.8462 | 45.66  | 1.839173166 |
| 63746482 | IVSPSGAAVPCK             |                    | PREDICTED: filamin, alpha [Mus musculus]                                                           | 1128.6057 | 37.54  | 0           |
| 30023842 | IVSQLLTLMDGLK            |                    | valosin containing protein [Mus musculus]                                                          | 1430.827  | 72.27  | 0.884394552 |
| 18079339 | IVYGHLDPPANQEIER         |                    | aconitase 2, mitochondrial [Mus musculus]                                                          | 1868.922  | 65.67  | 1.007600791 |
| 8567336  | IWALGGVTSR               |                    | chloride channel calcium activated 3 [Mus musculus]                                                | 1174.6268 | 59.42  | 1.113715356 |
| 33859482 | IWCFGPDGTGPNILTDITK      |                    | eukaryotic translation elongation factor 2 [Mus musculus]                                          | 2048.0117 | 51.18  | 1.304904496 |
| 6678483  | IYDDDFQNLQDGVANALDNIDAR  |                    | ubiquitin-activating enzyme E1, Chr X [Mus musculus]                                               | 2614.2058 | 53.69  | 1.099515311 |
| 33859554 | IYELAAGGTAVGTGLNTR       |                    | fumarate hydratase 1 [Mus musculus]                                                                | 1763.9386 | 66.73  | 1.255212737 |
| 8567390  | IYIDDLISLVVR             |                    | pyruvate kinase liver and red blood cell [Mus musculus]                                            | 1475.8456 | 36.88  | 0           |
| 51491845 | IYDSNNNPER               |                    | clathrin, heavy polypeptide (Hc) [Mus musculus]                                                    | 1334.6416 | 49.16  | 1.432447723 |
| 22122523 | IYLGQLECFSLGNLDAK        |                    | GDP-mannose 4, 6-dehydratase [Mus musculus]                                                        | 1883.9419 | 34.73  | 1.630261241 |
| 6671622  | IYLTADNLVNLQDESFR        |                    | B-cell receptor-associated protein 37 [Mus musculus]                                               | 2225.1506 | 34.39  | 0           |
| 6680618  | IYQIYEGTAQIQR            |                    | acetyl-Coenzyme A dehydrogenase, medium chain [Mus musculus]                                       | 1582.828  | 35.2   | 7.060047097 |
| 22164798 | IYVVVVGSEPR              |                    | selenium binding protein 1 [Mus musculus]                                                          | 1233.6526 | 37.43  | 1.122275164 |
| 7305295  | KATLQAEQLSNELATER        |                    | myosin, heavy polypeptide 11, smooth muscle [Mus musculus]                                         | 1902.0002 | 104.23 | 0.269498462 |
| 7304901  | KCYEAGMTLGARK            | Oxidation (M)      | androgen receptor [Mus musculus]                                                                   | 1443.7054 | 19.01  | 0           |
| 6671507  | KDLYANNVLSGGTTMYPGIADR   |                    | actin, alpha 2, smooth muscle, aorta [Mus musculus]                                                | 2356.1814 | 144.99 | 0.108131737 |
| 6671507  | KDLYANNVLSGGTTMYPGIADR   | Deamidation (NQ)   | actin, alpha 2, smooth muscle, aorta [Mus musculus]                                                | 2357.1565 | 96.38  | 1.555102718 |
| 6671507  | KDLYANNVLSGGTTMYPGIADR   | Oxidation (M)      | actin, alpha 2, smooth muscle, aorta [Mus musculus]                                                | 2372.1565 | 31.12  | 0.175775945 |
| 6671509  | KDLYANTVLSGGTTMYPGIADR   |                    | actin, beta, cytoplasmic [Mus musculus]                                                            | 2343.1692 | 107.41 | 1.101917086 |
| 63694749 | KDLYANTVLSGGTTMYPGIADR   |                    | PREDICTED: similar to cytoplasmic beta-actin [Mus musculus]                                        | 2343.1692 | 107.41 | 1.101917086 |
| 6671509  | KDLYANTVLSGGTTMYPGIADR   | Oxidation (M)      | actin, beta, cytoplasmic [Mus musculus]                                                            | 2359.1738 | 29.23  | 1.109087149 |
| 63694749 | KDLYANTVLSGGTTMYPGIADR   | Oxidation (M)      | PREDICTED: similar to cytoplasmic beta-actin [Mus musculus]                                        | 2359.1738 | 29.23  | 1.109087149 |
| 7305295  | KEEELQAALAR              |                    | myosin, heavy polypeptide 11, smooth muscle [Mus musculus]                                         | 1257.6841 | 65.96  | 0           |
| 20137006 | KEEELQAALAR              |                    | myosin, heavy polypeptide 9, non-muscle [Mus musculus]                                             | 1257.6841 | 65.96  | 0           |
| 33598964 | KFDQLLAEEK               |                    | myosin heavy chain 10, non-muscle [Mus musculus]                                                   | 1220.6458 | 62.8   | 0           |
| 7305295  | KFDQLLAEEK               |                    | myosin, heavy polypeptide 11, smooth muscle [Mus musculus]                                         | 1220.6458 | 62.8   | 0           |
| 20137006 | KFDQLLAEEK               |                    | myosin, heavy polypeptide 9, non-muscle [Mus musculus]                                             | 1220.6458 | 62.8   | 0           |
| 29336026 | KFDQLLAEEK               |                    | nonmuscle myosin heavy chain [Mus musculus]                                                        | 1220.6458 | 62.8   | 0           |
| 7305295  | KLEGDASDFHEQIADLQAQIAELK |                    | myosin, heavy polypeptide 11, smooth muscle [Mus musculus]                                         | 2669.321  | 30.05  | 0           |
| 7305295  | KLEVQLQLQSK              |                    | myosin, heavy polypeptide 11, smooth muscle [Mus musculus]                                         | 1428.8076 | 95.98  | 0           |
| 6753066  | KLLETEEEAAFPPLGGATPR     |                    | amine oxidase, copper containing 3 [Mus musculus]                                                  | 2029.0574 | 23.39  | 0           |
| 6680836  | KPEDWDEEMDGEWEPPIQNPEYK  |                    | calreticulin [Mus musculus]                                                                        | 2960.3064 | 43.6   | 0           |
| 33695080 | KPGLLNSSNKEQSELR         | 3 Deamidation (NQ) | protein kinase C binding protein 1 [Mus musculus]                                                  | 1802.9156 | 21.99  | 0           |
| 31982099 | LAAIQESGVER              |                    | proteasome (prosome, macropain) subunit, beta type 6 [Mus musculus]                                | 1172.6277 | 23.12  | 1.638084442 |
| 6678499  | LAANAFLAQR               |                    | UDP-glucose dehydrogenase [Mus musculus]                                                           | 1074.6038 | 33.21  | 0.426064054 |
| 31982522 | LADMALALESAR             |                    | acyl-Coenzyme A dehydrogenase, short chain [Mus musculus]                                          | 1260.6567 | 41.99  | 0           |
| 13624315 | LAELEALQR                |                    | keratin complex 2, basic, gene 8 [Mus musculus]                                                    | 1113.6301 | 65.59  | 1.399057281 |
| 6753010  | LAEQFVLLNLVYETTDK        |                    | anterior gradient 2 [Mus musculus]                                                                 | 1996.0645 | 77.77  | 0           |
| 6678483  | LAGTQPLEVLEAVQR          |                    | ubiquitin-activating enzyme E1, Chr X [Mus musculus]                                               | 1623.9059 | 80.35  | 1.254844842 |
| 13624315 | LALDIEITTYR              |                    | keratin complex 2, basic, gene 8 [Mus musculus]                                                    | 1307.7224 | 59.15  | 1.78427987  |
| 23956396 | LALQQLTSMAPGLVIQAVR      |                    | SPFH domain family, member 2 [Mus musculus]                                                        | 2124.1843 | 33.08  | 2.555058071 |
| 51770896 | LAMQEFMILPVGASSFR        |                    | PREDICTED: similar to Alpha enolase (2-phospho-D-glycerate hydro-lyase) (Non-neural enolase) (NNE) | 1896.9757 | 77.02  | 1.008157849 |
| 31543942 | LANVMMGPYR               |                    | vinculin [Mus musculus]                                                                            | 1151.569  | 21.85  | 0           |
| 6679687  | LAPEYEAATR               |                    | glucose regulated protein [Mus musculus]                                                           | 1191.6046 | 45.08  | 0.932583808 |
| 31981562 | LAPITSDPTEAAAVGAVEASFK   |                    | pyruvate kinase 3 [Mus musculus]                                                                   | 2145.1077 | 104.19 | 2.792808959 |
| 6755809  | LAQAAQSSVATITR           |                    | talin 1 [Mus musculus]                                                                             | 1416.7837 | 25.89  | 2.732768584 |
| 19527018 | LAQDFLDSQNL SAYNTR       |                    | dipeptidylpeptidase III [Mus musculus]                                                             | 1955.9498 | 19.19  | 0.922713908 |
| 18079351 | LAQDPFPLYPGELLEK         |                    | major vault protein [Mus musculus]                                                                 | 1829.9683 | 35.54  | 1.136816162 |
| 41322904 | LAQGHTTVAELTQR           |                    | plectin 1 isoform 1 [Mus musculus]                                                                 | 1524.8202 | 30.75  | 0.627609285 |
| 51770896 | LAQSNWGWVMVSHR           |                    | PREDICTED: similar to Alpha enolase (2-phospho-D-glycerate hydro-lyase) (Non-neural enolase) (NNE) | 1541.7667 | 34.3   | 1.364933841 |
| 51770896 | LAQSNWGWVMVSHR           | Deamidation (NQ)   | PREDICTED: similar to Alpha enolase (2-phospho-D-glycerate hydro-lyase) (Non-neural enolase) (NNE) | 1542.7671 | 65.18  | 1.303173387 |
| 11230802 | LASDLLEWIR               |                    | actinin alpha 4 [Mus musculus]                                                                     | 1215.6747 | 65.06  | 0.826812415 |
| 10946574 | LAVEALSSLDGDLGR          |                    | creatine kinase, brain [Mus musculus]                                                              | 1602.8406 | 92.23  | 0           |
| 63650229 | LAVNMVPPFR               |                    | PREDICTED: similar to TUBULIN BETA CHAIN (T BETA-15) [Mus musculus]                                | 1143.6293 | 42.2   | 0.947684509 |
| 22165384 | LAVNMVPPFR               |                    | tubulin, beta, 2 [Mus musculus]                                                                    | 1143.6293 | 42.2   | 0.947684509 |
| 33859488 | LAVNMVPPFR               |                    | tubulin, beta 2 [Mus musculus]                                                                     | 1143.6293 | 42.2   | 0.947684509 |



|          |                         |                                                                                                     |           |        |             |
|----------|-------------------------|-----------------------------------------------------------------------------------------------------|-----------|--------|-------------|
| 12963615 | LAVNMVPPFR              | tubulin, beta 3 [Mus musculus]                                                                      | 1143.6293 | 42.2   | 0.947684509 |
| 31981939 | LAVNMVPPFR              | tubulin, beta 4 [Mus musculus]                                                                      | 1143.6293 | 42.2   | 0.947684509 |
| 7106439  | LAVNMVPPFR              | tubulin, beta 5 [Mus musculus]                                                                      | 1143.6293 | 42.2   | 0.947684509 |
| 27754056 | LAVNMVPPFR              | tubulin, beta 6 [Mus musculus]                                                                      | 1143.6293 | 42.2   | 0.947684509 |
| 56090513 | LCAEVPTR                | hypothetical protein LOC434285 [Mus musculus]                                                       | 888.4442  | 21.27  | 0           |
| 6671507  | LCYVALDFENEMATAASSSSLEK | actin, alpha 2, smooth muscle, aorta [Mus musculus]                                                 | 2479.1753 | 21.6   | 0.227317214 |
| 6671507  | LCYVALDFENEMATAASSSSLEK | actin, alpha 2, smooth muscle, aorta [Mus musculus]                                                 | 2480.1479 | 51.91  | 0           |
| 6671509  | LCYVALDFEQEMATAASSSSLEK | actin, beta, cytoplasmic [Mus musculus]                                                             | 2493.1777 | 27.88  | 0           |
| 63652452 | LCYVALDFEQEMATAASSSSLEK | PREDICTED: similar to cytoplasmic beta-actin [Mus musculus]                                         | 2493.1777 | 27.88  | 0           |
| 6671509  | LCYVALDFEQEMATAASSSSLEK | actin, beta, cytoplasmic [Mus musculus]                                                             | 2494.1704 | 40.74  | 0           |
| 63652452 | LCYVALDFEQEMATAASSSSLEK | PREDICTED: similar to cytoplasmic beta-actin [Mus musculus]                                         | 2494.1704 | 40.74  | 0           |
| 7305295  | LDAFLVLEQLR             | myosin, heavy polypeptide 11, smooth muscle [Mus musculus]                                          | 1316.7654 | 69.06  | 0.251821797 |
| 30794450 | LDELYGTWR               | ribosomal protein L4 [Mus musculus]                                                                 | 1152.5707 | 22.3   | 1.052946081 |
| 31981562 | LDIDSAPITAR             | pyruvate kinase 3 [Mus musculus]                                                                    | 1171.6311 | 55.17  | 0           |
| 6677819  | LDILDTAGQEEFGAMR        | Harvey rat sarcoma oncogene, subgroup R [Mus musculus]                                              | 1765.8508 | 52.68  | 0           |
| 54607112 | LDLGSNEFTEVPEVLEQLSGLR  | ErbB2 interacting protein isoform 2 [Mus musculus]                                                  | 2445.2334 | 19.02  | 0           |
| 22779912 | LDLMDAGTDAMDVLMDGR      | dynamin 1-like [Mus musculus]                                                                       | 1823.8621 | 35.14  | 0           |
| 6678359  | LDNLVAIFDINR            | transketolase [Mus musculus]                                                                        | 1402.7732 | 95.72  | 1.382712485 |
| 33859686 | LDQETAQWLR              | phosphoglucomutase 1 [Mus musculus]                                                                 | 1259.6484 | 22.09  | 1.464068096 |
| 30023842 | LDQLIYIPLDEK            | valosin containing protein [Mus musculus]                                                           | 1556.8501 | 49.3   | 2.033145058 |
| 6754482  | LEAEIATYR               | keratin complex 1, acidic, gene 18 [Mus musculus]                                                   | 1065.5581 | 27.17  | 1.707599297 |
| 13624315 | LEAELGNMQGLVEDFK        | keratin complex 2, basic, gene 8 [Mus musculus]                                                     | 1792.8859 | 88.12  | 1.698009511 |
| 63565108 | LEAELGNMQGLVEDFK        | PREDICTED: similar to cytokeratin EndoA - mouse [Mus musculus]                                      | 1792.8859 | 88.12  | 1.698009511 |
| 18079339 | LEAPDADELPR             | aconitase 2, mitochondrial [Mus musculus]                                                           | 1225.6028 | 26.93  | 0           |
| 6755817  | LEDKDDLDTVELSNEELLDQLVR | thymopoietin [Mus musculus]                                                                         | 2701.3096 | 84.76  | 1.164418932 |
| 6679261  | LEEGPPVTTVLTNR          | pyruvate dehydrogenase E1 alpha 1 [Mus musculus]                                                    | 1411.7842 | 22.99  | 1.03638696  |
| 7305295  | LEGDASDFHEQIADLQAIKELK  | myosin, heavy polypeptide 11, smooth muscle [Mus musculus]                                          | 2541.2498 | 76.33  | 0           |
| 55742711 | LEGHGLPTNLPR            | EH-domain containing 2 [Mus musculus]                                                               | 1303.7104 | 33.78  | 0.779121181 |
| 13624315 | LEGLTDEINFLR            | keratin complex 2, basic, gene 8 [Mus musculus]                                                     | 1419.7576 | 73.17  | 1.380227042 |
| 63565108 | LEGLTDEINFLR            | PREDICTED: similar to cytokeratin EndoA - mouse [Mus musculus]                                      | 1419.7576 | 73.17  | 1.380227042 |
| 55742711 | LEISDEFSEAIAGLR         | EH-domain containing 2 [Mus musculus]                                                               | 1649.8401 | 79.84  | 0.898946798 |
| 6680748  | LELAQYR                 | ATP synthase, H+ transporting, mitochondrial F1 complex, alpha subunit, isoform 1 [Mus musculus]    | 892.4811  | 24.92  | 1.098372846 |
| 51711855 | LENVSVALEFLER           | PREDICTED: similar to Filamin C (Gamma-filamin) (Filamin 2) (Protein FLNc) (Actin-binding like prot | 1518.8217 | 51.66  | 0.923226419 |
| 21592285 | LEQEIATYR               | keratin 20 [Mus musculus]                                                                           | 1122.5808 | 37.26  | 1.476098617 |
| 7106335  | LEQEIATYR               | keratin complex 1, acidic, gene 17 [Mus musculus]                                                   | 1122.5808 | 37.26  | 1.476098617 |
| 6680606  | LEQEIATYR               | keratin complex 1, acidic, gene 19 [Mus musculus]                                                   | 1122.5808 | 37.26  | 1.476098617 |
| 547751   | LEQEIATYR               | Keratin, type I cytoskeletal 17 (Cytokeratin 17) (K17) (CK 17) (39.1)                               | 1122.5808 | 37.26  | 1.476098617 |
| 417200   | LEQEIATYR               | Keratin, type I cytoskeletal 19 (Cytokeratin 19) (K19) (CK 19)                                      | 1122.5808 | 37.26  | 1.476098617 |
| 63517295 | LEQVSSDEGIGTLAENLLEALR  | PREDICTED: RIKEN cDNA 1810009A16 [Mus musculus]                                                     | 2357.2019 | 23.26  | 1.377066248 |
| 21704156 | LEQYTNAIEGTK            | caldesmon 1 [Mus musculus]                                                                          | 1366.6869 | 47.31  | 0           |
| 13624315 | LESGMQNMSIHTK           | keratin complex 2, basic, gene 8 [Mus musculus]                                                     | 1475.7079 | 72.65  | 1.650822567 |
| 63565108 | LEVDPNIQAVR             | PREDICTED: similar to cytokeratin EndoA - mouse [Mus musculus]                                      | 1253.7021 | 46.8   | 1.539362028 |
| 6753262  | LEVEANNAFDQYR           | capping protein (actin filament) muscle Z-line, beta [Mus musculus]                                 | 1568.7404 | 41.05  | 0           |
| 7305295  | LEVQLQDLQSK             | myosin, heavy polypeptide 11, smooth muscle [Mus musculus]                                          | 1300.6924 | 64.98  | 0           |
| 7305173  | LFDQAFGVPR              | heat shock protein 1 [Mus musculus]                                                                 | 1149.6029 | 58.92  | 0.355787626 |
| 55742711 | LFEEEQDLFR              | EH-domain containing 2 [Mus musculus]                                                               | 1438.719  | 73.88  | 0.556058262 |
| 31559916 | LFIGGLSFETTDDSLR        | heterogeneous nuclear ribonucleoprotein A3 isoform b [Mus musculus]                                 | 1770.8922 | 125.08 | 1.441372522 |
| 7949053  | LFIGGLSFETTEESLR        | heterogeneous nuclear ribonucleoprotein A2/B1 isoform 1 [Mus musculus]                              | 1798.9221 | 56.45  | 1.442347627 |
| 38198665 | LGAAPPEESAIVYAGER       | p47 protein [Mus musculus]                                                                          | 1648.7878 | 37.76  | 2.3595537   |
| 21592285 | LGAAPSVYGGAGGHGTR       | keratin 20 [Mus musculus]                                                                           | 1527.7792 | 29.27  | 0.8840977   |
| 54607098 | LGANSLDLVVFGR           | succinate dehydrogenase Fp subunit [Mus musculus]                                                   | 1473.85   | 96     | 1.034661351 |
| 30725863 | LGDAVEEQGVINNSVLGYFGR   | glycyl-tRNA synthetase [Mus musculus]                                                               | 2221.1614 | 20.58  | 2.015247781 |
| 31982755 | LGDLYEEEMR              | vimentin [Mus musculus]                                                                             | 1254.5687 | 36.83  | 0.758216295 |
| 6679291  | LGDVYVNDAFGTAHR         | phosphoglycerate kinase 1 [Mus musculus]                                                            | 1634.7938 | 91.85  | 2.252070148 |
| 136429   | LGEHNIDVLEQNEQFINAAK    | Trypsin precursor                                                                                   | 2211.1301 | 120.92 | 0           |
| 6671571  | LGEIVTTIPTIGFNVETVEYK   | ADP-ribosylation factor 2 [Mus musculus]                                                            | 2323.2598 | 109.85 | 1.583899646 |
| 10181184 | LGELPSWIMMR             | ATP synthase, H+ transporting, mitochondrial F0 complex, subunit f, isoform 2 [Mus musculus]        | 1332.6849 | 30.34  | 1.061876818 |
| 33859506 | LGEYGFQNALIVR           | albumin 1 [Mus musculus]                                                                            | 1479.7976 | 44.93  | 3.118937632 |
| 6755714  | LGFWVWLK                | transgelin [Mus musculus]                                                                           | 990.5727  | 23.19  | 0.306286712 |
| 10946574 | LGFSVELVQMVDGVK         | creatine kinase, brain [Mus musculus]                                                               | 1848.9772 | 67.82  | 0.38816225  |

|          |                                  |                  |                                                                                                     |           |        |             |
|----------|----------------------------------|------------------|-----------------------------------------------------------------------------------------------------|-----------|--------|-------------|
| 33859514 | LGGNYGPTVAVQR                    |                  | branched chain aminotransferase 2, mitochondrial [Mus musculus]                                     | 1331.7085 | 19.06  | 0.902956322 |
| 6754084  | LGLDFPNLPYLIDGSHK                |                  | glutathione S-transferase, mu 1 [Mus musculus]                                                      | 1898.9993 | 46.3   | 3.08074437  |
| 40556608 | LGLGIDEVTEAEPSSAAVPEIPPLEGDEDASR |                  | heat shock protein 1, beta [Mus musculus]                                                           | 3535.6187 | 115.94 |             |
| 6677811  | LGMPQFLSTEAQSLLR                 |                  | ribosomal protein S6 kinase polypeptide 1 [Mus musculus]                                            | 1790.9427 | 21.29  | 1.753119421 |
| 6678359  | LGQSDPAPLQHQVDIYQK               |                  | transketolase [Mus musculus]                                                                        | 2037.0498 | 57.19  | 1.466021721 |
| 25020120 | LGSQATGVGQQAQQLDITTESTLGR        |                  | PREDICTED: laminin, alpha 5 [Mus musculus]                                                          | 2488.272  | 78.32  | 0           |
| 31560611 | LGTDQPLDQATISLQMGTNK             |                  | calponin 1 [Mus musculus]                                                                           | 2131.0776 | 103.42 | 0.229986946 |
| 31560611 | LGTDQPLDQATISLQMGTNK             | Oxidation (M)    | calponin 1 [Mus musculus]                                                                           | 2147.0652 | 78.19  | 0           |
| 6753428  | LGYLTCPSNLGTGLR                  |                  | creatine kinase, mitochondrial 1, ubiquitous [Mus musculus]                                         | 1677.8993 | 31.49  | 6.6679941   |
| 63746482 | LIALLEVLVSQK                     |                  | PREDICTED: filamin, alpha [Mus musculus]                                                            | 1226.7675 | 66.52  | 0.370022341 |
| 63660294 | LIALLEVLVSQK                     |                  | PREDICTED: similar to Filamin B (FLN-B) (Beta-filamin) (Actin-binding like protein) (ABP-280-like p | 1226.7675 | 66.52  | 0.370022341 |
| 51711855 | LIALLEVLVSQK                     |                  | PREDICTED: similar to Filamin C (Gamma-filamin) (Filamin 2) (Protein FLNc) (Actin-binding like prot | 1226.7675 | 66.52  | 0.370022341 |
| 19745150 | LIDKEVISPDTR                     |                  | diaphorase 1 [Mus musculus]                                                                         | 1385.7611 | 25.95  | 3.425408642 |
| 6755901  | LIGQIVSSITASLR                   |                  | tubulin, alpha 1 [Mus musculus]                                                                     | 1457.8729 | 70.45  | 0.538486545 |
| 33238874 | LIIGQNGILSTPAVSCIIR              |                  | phosphoglucomutase 5 [Mus musculus]                                                                 | 1968.1276 | 21.87  | 0.447455738 |
| 6678573  | LIQWNGPESNR                      |                  | villin 1 [Mus musculus]                                                                             | 1426.7524 | 48.91  | 1.309553062 |
| 22164798 | LILPGLISSR                       |                  | selenium binding protein 1 [Mus musculus]                                                           | 1068.6774 | 46.78  | 1.374956296 |
| 58037546 | LILPYVELDLHSDYDLGIENR            |                  | isocitrate dehydrogenase 1 (NADP+), soluble [Mus musculus]                                          | 2372.2205 | 30.21  | 1.448463136 |
| 34740335 | LISQIVSSITASLR                   |                  | tubulin, alpha 2 [Mus musculus]                                                                     | 1487.8868 | 81.27  | 1.661829912 |
| 6678467  | LISQIVSSITASLR                   |                  | tubulin, alpha 4 [Mus musculus]                                                                     | 1487.8868 | 81.27  | 1.661829912 |
| 6678469  | LISQIVSSITASLR                   |                  | tubulin, alpha 6 [Mus musculus]                                                                     | 1487.8868 | 81.27  | 1.661829912 |
| 6679937  | LISWYDNEYGYSNR                   |                  | similar to glyceraldehyde-3-phosphate dehydrogenase [Mus musculus]                                  | 1779.8079 | 87.87  | 1.164091815 |
| 6680748  | LKEIVTNFLAGFEP                   |                  | ATP synthase, H+ transporting, mitochondrial F1 complex, alpha subunit, isoform 1 [Mus musculus]    | 1577.8574 | 122.99 | 1.174067198 |
| 7305295  | LKEVLLQVEDER                     |                  | myosin, heavy polypeptide 11, smooth muscle [Mus musculus]                                          | 1470.8221 | 37.07  | 0.422556035 |
| 13624315 | LKLEAELGNMQGLVEDFK               |                  | keratin complex 2, basic, gene 8 [Mus musculus]                                                     | 2034.0591 | 87.46  | 1.971985551 |
| 63565108 | LKLEAELGNMQGLVEDFK               |                  | PREDICTED: similar to cytokeratin EndoA - mouse [Mus musculus]                                      | 2034.0591 | 87.46  | 1.971985551 |
| 13624315 | LKLEAELGNMQGLVEDFK               | Deamidation (NQ) | keratin complex 2, basic, gene 8 [Mus musculus]                                                     | 2035.0619 | 37.65  | 1.782822564 |
| 63565108 | LKLEAELGNMQGLVEDFK               | Deamidation (NQ) | PREDICTED: similar to cytokeratin EndoA - mouse [Mus musculus]                                      | 2035.0619 | 37.65  | 1.782822564 |
| 27370092 | LLDAVDYIYVPVTR                   |                  | Tu translation elongation factor, mitochondrial [Mus musculus]                                      | 1572.8615 | 51.5   | 1.334033403 |
| 55742711 | LLEALDDMLAQDIK                   | Deamidation (NQ) | EH-domain containing 2 [Mus musculus]                                                               | 1659.8743 | 48.01  | 14.97462594 |
| 6753066  | LLETEEEAAFPPLGATPR               |                  | amine oxidase, copper containing 3 [Mus musculus]                                                   | 1900.9681 | 79.04  | 0           |
| 31981017 | LLHTQYHAVEKPSGSLIR               | Deamidation (NQ) | nuclear prelamin A recognition factor-like [Mus musculus]                                           | 2137.1174 | 19.29  | 1.532806529 |
| 10946574 | LLIEMEQR                         |                  | creatine kinase, brain [Mus musculus]                                                               | 1031.5507 | 42.19  | 0.173534361 |
| 20874851 | LLLPGELAK                        |                  | PREDICTED: similar to histone H2b-616 [Mus musculus]                                                | 953.5967  | 48.73  | 1.482144184 |
| 51491845 | LLLPWLEAR                        |                  | clathrin, heavy polypeptide (Hc) [Mus musculus]                                                     | 1110.6682 | 26.62  | 1.756751711 |
| 63556656 | LLNPQGAIR                        |                  | PREDICTED: RIKEN cDNA A430096B05 gene [Mus musculus]                                                | 981.5788  | 34.27  | 3.122316868 |
| 6680960  | LLPETSPDPFAIWQITDR               |                  | procollagen, type XII, alpha 1 [Mus musculus]                                                       | 2099.0776 | 43.33  | 0.832167807 |
| 31981690 | LLQDFFNQK                        |                  | heat shock protein 8 [Mus musculus]                                                                 | 1081.5574 | 51.47  | 1.967465466 |
| 31982755 | LLQDSVDFSLADAINTEFK              |                  | vimentin [Mus musculus]                                                                             | 2126.0542 | 47.18  | 0           |
| 24418919 | LLSLVDDEAFIR                     |                  | brain glycogen phosphorylase [Mus musculus]                                                         | 1390.7566 | 59.04  | 0.774005143 |
| 63562740 | LLTSAAFEDCQTR                    |                  | PREDICTED: similar to secreted gel-forming mucin [Mus musculus]                                     | 1454.7037 | 24.71  | 0.795293078 |
| 33859650 | LLVPLVPDLQDVAQLR                 |                  | membrane bound C2 domain containing protein [Mus musculus]                                          | 1789.0643 | 20.91  | 1.985629546 |
| 17647499 | LLVVYPWQTR                       |                  | hemoglobin, beta adult minor chain [Mus musculus]                                                   | 1274.7336 | 21.84  | 0           |
| 31981826 | LLYDLADQLHAAVGASR                |                  | electron transferring flavoprotein, alpha polypeptide [Mus musculus]                                | 1812.9611 | 36.1   | 0.653488812 |
| 51491845 | LLYNNVSNFGR                      |                  | clathrin, heavy polypeptide (Hc) [Mus musculus]                                                     | 1296.6648 | 38.91  | 1.464112766 |
| 7657429  | LLYPADIPVGNQDQLELLNK             |                  | osteoblast specific factor 2 (fasciilin I-like) [Mus musculus]                                      | 2238.24   | 51.43  | 1.213404348 |
| 29336026 | LMATLSNTNPSFVR                   |                  | nonmuscle myosin heavy chain [Mus musculus]                                                         | 1550.7988 | 19.05  | 0           |
| 33859482 | LMEPIYLVEIQCPQVVGGIYGLNR         |                  | eukaryotic translation elongation factor 2 [Mus musculus]                                           | 2932.5344 | 25.7   | 1.937460572 |
| 31560689 | LMFNDFLSSSDK                     |                  | 3-hydroxy-3-methylglutaryl-Coenzyme A synthase 2 [Mus musculus]                                     | 1490.6899 | 74.84  | 0           |
| 59709449 | LMLLLEVISGER                     |                  | actinin alpha 2 [Mus musculus]                                                                      | 1372.7852 | 39.92  | 0.777776365 |
| 7304855  | LMLLLEVISGER                     |                  | actinin alpha 3 [Mus musculus]                                                                      | 1372.7852 | 39.92  | 0.777776365 |
| 11230802 | LMLLLEVISGER                     |                  | actinin alpha 4 [Mus musculus]                                                                      | 1372.7852 | 39.92  | 0.777776365 |
| 6755809  | LNEAAAGLNQAATELVQASR             |                  | talin 1 [Mus musculus]                                                                              | 2027.0574 | 67.64  | 0.618386652 |
| 27370516 | LNEHFLNTTDFLDTIK                 |                  | isocitrate dehydrogenase 2 (NADP+), mitochondrial [Mus musculus]                                    | 1920.9847 | 26.79  | 0.119002585 |
| 6679687  | LNFVASR                          |                  | glucose regulated protein [Mus musculus]                                                            | 877.4815  | 40.84  | 1.049663143 |
| 63492583 | LNGTDPEDVIR                      |                  | PREDICTED: myosin regulatory light polypeptide 9 [Mus musculus]                                     | 1228.6191 | 21.32  | 0.974982232 |
| 45387933 | LNIQPSETDYAVDIR                  |                  | UDP-glucose ceramide glucosyltransferase-like 1 [Mus musculus]                                      | 1733.8671 | 22.35  | 1.45839325  |
| 6679030  | LNITPNSGATGNNAGPK                |                  | N-myc downstream regulated-like [Mus musculus]                                                      | 1625.7991 | 67.92  | 1.695330882 |
| 63476037 | LNLLDLDYELAEQLDNIAEK             |                  | PREDICTED: procollagen, type VI, alpha 3 [Mus musculus]                                             | 2332.2002 | 94.47  | 0           |
| 6677819  | LNVDEAFEQLVR                     |                  | Harvey rat sarcoma oncogene, subgroup R [Mus musculus]                                              | 1432.7382 | 21.64  | 0           |

|          |                           |                  |                                                                                                     |           |        |             |
|----------|---------------------------|------------------|-----------------------------------------------------------------------------------------------------|-----------|--------|-------------|
| 9790017  | LNWLSVDFNNWK              |                  | telomerase binding protein, p23 [Mus musculus]                                                      | 1535.7838 | 36.29  | 0.622355085 |
| 33859811 | LPAKPEVSSDEDVQYR          |                  | hydroxyacyl-Coenzyme A dehydrogenase/3-ketoacyl-Coenzyme A thiolase/enoyl-Coenzyme A hydratase (tri | 1832.9121 | 88.02  | 0.97338481  |
| 33859506 | LPCVEDYLSAILNR            |                  | albumin 1 [Mus musculus]                                                                            | 1605.834  | 61.81  | 2.45865446  |
| 31982472 | LPIGDVATQYFADR            |                  | chaperonin subunit 7 (eta) [Mus musculus]                                                           | 1565.7986 | 46.38  | 1.963976342 |
| 51873060 | LPLQDVYK                  |                  | eukaryotic translation elongation factor 1 alpha 1 [Mus musculus]                                   | 975.5461  | 45.87  | 1.303990029 |
| 22267442 | LPNGLVIASLENYAPLSR        |                  | ubiquinol cytochrome c reductase core protein 2 [Mus musculus]                                      | 1927.0717 | 36.61  | 1.018331717 |
| 63746482 | LPQLPITNFSR               |                  | PREDICTED: filamin, alpha [Mus musculus]                                                            | 1285.7256 | 82.81  | 0           |
| 63738313 | LPSGSGPASPTTGSADVDR       |                  | PREDICTED: similar to AHNAK [Mus musculus]                                                          | 1769.8989 | 29.64  | 1.33341031  |
| 41322904 | LPVDVAYQR                 |                  | plectin 1 isoform 1 [Mus musculus]                                                                  | 1060.571  | 20.33  | 1.0248514   |
| 31560689 | LPWDVAGR                  |                  | 3-hydroxy-3-methylglutaryl-Coenzyme A synthase 2 [Mus musculus]                                     | 913.4813  | 31.8   | 1.086199661 |
| 27370126 | LPYTEEEQLSR               |                  | carboxylesterase 5 [Mus musculus]                                                                   | 1493.7209 | 30.84  | 1.690443095 |
| 13624315 | LQAEIEALK                 |                  | keratin complex 2, basic, gene 8 [Mus musculus]                                                     | 1014.5734 | 25.17  | 2.665831979 |
| 31982755 | LQDEIQNMKEEMAR            |                  | vimentin [Mus musculus]                                                                             | 1734.8096 | 63.36  | 1.097649542 |
| 7305295  | LQDFASTIEVMEEGK           | Deamidation (NQ) | myosin, heavy polypeptide 11, smooth muscle [Mus musculus]                                          | 1697.8164 | 33.39  | 0           |
| 7305295  | LQDFASTIEVMEEGK           | Oxidation (M)    | myosin, heavy polypeptide 11, smooth muscle [Mus musculus]                                          | 1712.7982 | 36.18  | 0.412197787 |
| 7305295  | LQDFASTIEVMEEGKK          |                  | myosin, heavy polypeptide 11, smooth muscle [Mus musculus]                                          | 1824.8787 | 33.75  | 0           |
| 33563250 | LQEEIQLR                  |                  | desmin [Mus musculus]                                                                               | 1028.5802 | 35.53  | 0           |
| 6678573  | LQEENQVITPR               |                  | villin 1 [Mus musculus]                                                                             | 1326.7102 | 58.52  | 1.451609838 |
| 50355692 | LQEKEDLQELNDR             |                  | lamin A isoform A [Mus musculus]                                                                    | 1629.8109 | 49.41  | 1.03233907  |
| 8393988  | LQEQLGNDVVEK              |                  | phosphomannomutase 2 [Mus musculus]                                                                 | 1371.7019 | 29.54  | 0           |
| 30525051 | LQIWDTAGQESFR             |                  | RAB2B protein [Mus musculus]                                                                        | 1550.7689 | 35.54  | 0.719144443 |
| 10946940 | LQIWDTAGQESFR             |                  | RAB2, member RAS oncogene family [Mus musculus]                                                     | 1550.7689 | 35.54  | 0.719144443 |
| 21450625 | LQMEAPHIIVGTPGR           |                  | eukaryotic translation initiation factor 4A1 [Mus musculus]                                         | 1618.8732 | 24.81  | 1.791958247 |
| 7305295  | LQNEVESVTGMLNEAEGK        |                  | myosin, heavy polypeptide 11, smooth muscle [Mus musculus]                                          | 1947.9419 | 114.89 | 0           |
| 38089265 | LQNTGVADGYPR              |                  | PREDICTED: palladin [Mus musculus]                                                                  | 1389.7163 | 67.62  | 0           |
| 7305295  | LQQELDDLVDLDNQR           |                  | myosin, heavy polypeptide 11, smooth muscle [Mus musculus]                                          | 1912.9728 | 117.17 | 0.214721381 |
| 7305295  | LQQELDDLVDLDNQR           | Deamidation (NQ) | myosin, heavy polypeptide 11, smooth muscle [Mus musculus]                                          | 1913.9636 | 26.12  | 0.618555224 |
| 19527026 | LQQLPADFGR                |                  | hypothetical protein LOC98238 [Mus musculus]                                                        | 1144.6124 | 40.84  | 6.164877909 |
| 63746482 | LQVEPAVDTSGVQCYPGIEGGVFR  |                  | PREDICTED: filamin, alpha [Mus musculus]                                                            | 2706.3132 | 114.52 | 0.22148791  |
| 63476037 | LSDAGITPLFLTSQEDR         |                  | PREDICTED: procollagen, type VI, alpha 3 [Mus musculus]                                             | 1862.954  | 84.49  | 0.207669015 |
| 63489759 | LSDDNTIGQEEIQQR           |                  | PREDICTED: spectrin alpha 2 [Mus musculus]                                                          | 1745.8192 | 30.11  | 0.986970819 |
| 6754206  | LSDEILIDLTR               |                  | hexokinase 1 [Mus musculus]                                                                         | 1400.8068 | 61.36  | 1.302670005 |
| 6671666  | LSDLLAPISEIQIEVITFR       |                  | CAP, adenylate cyclase-associated protein 1 [Mus musculus]                                          | 2172.1946 | 98.49  | 1.694906797 |
| 12963539 | LSGAQADLHIGEGDSIR         |                  | ETHE1 protein [Mus musculus]                                                                        | 1738.8793 | 90.11  | 0.767505782 |
| 7948997  | LSGGIDFNQPLVITR           |                  | PDZ and LIM domain 3 [Mus musculus]                                                                 | 1629.8921 | 71.59  | 0.336550285 |
| 27229048 | LSGVSVSSDAFFPFR           |                  | 5-aminimidazole-4-carboxamide ribonucleotide formyltransferase/IMP cyclohydrolase [Mus musculus]    | 1615.8129 | 34.18  | 1.53513634  |
| 6753484  | LSIIATDHTYR               |                  | procollagen, type VI, alpha 1 [Mus musculus]                                                        | 1289.6846 | 20.67  | 0           |
| 6679166  | LSLLEELTLAENQLLR          |                  | osteoglycin [Mus musculus]                                                                          | 1855.0587 | 69.59  | 0.475612904 |
| 63641940 | LSLQDAVNQGLIDQDMATR       |                  | PREDICTED: desmoplakin [Mus musculus]                                                               | 2088.0427 | 23.57  | 1.374820003 |
| 13384736 | LSLSNAISTVPLTQLR          |                  | dynein, cytoplasmic, heavy chain 1 [Mus musculus]                                                   | 1826.0623 | 22.74  | 0.918937109 |
| 11230802 | LSNRPAFMPSEGR             |                  | actinin alpha 4 [Mus musculus]                                                                      | 1461.7257 | 22.4   | 0.591245463 |
| 6755967  | LSQNNFALGYK               |                  | voltage-dependent anion channel 3 [Mus musculus]                                                    | 1254.6476 | 57.36  | 1.445033976 |
| 33859506 | LSQTFPNADFAEITK           | Deamidation (NQ) | albumin 1 [Mus musculus]                                                                            | 1682.8452 | 22.7   | 0           |
| 6754556  | LSSEMNTSTVNSAR            |                  | lamin B1 [Mus musculus]                                                                             | 1496.7081 | 25.94  | 1.810494926 |
| 136429   | LSSPATLNSR                |                  | Trypsin precursor                                                                                   | 1045.5658 | 53.68  | 0           |
| 6680606  | LSVEADINGLR               |                  | keratin complex 1, acidic, gene 19 [Mus musculus]                                                   | 1186.6459 | 54.97  | 1.38764294  |
| 547751   | LSVEADINGLR               |                  | Keratin, type I cytoskeletal 17 (Cytokeratin 17) (K17) (CK 17) (39.1)                               | 1186.6459 | 54.97  | 1.38764294  |
| 51491845 | LTQQLPLIIVCDR             |                  | clathrin, heavy polypeptide (Hc) [Mus musculus]                                                     | 1498.8043 | 37.55  | 1.164828623 |
| 6755863  | LTESPCALVASQYGWSGNMER     |                  | tumor rejection antigen gp96 [Mus musculus]                                                         | 2299.0615 | 35.64  | 1.142198022 |
| 29789191 | LTESVDVLMPPNVGEIVGGSMR    |                  | asparaginyl-tRNA synthetase [Mus musculus]                                                          | 2203.1218 | 30.42  | 1.138718029 |
| 6755963  | LTFDSSFSPTGK              |                  | voltage-dependent anion channel 1 [Mus musculus]                                                    | 1400.6681 | 65.69  | 1.042326758 |
| 6755965  | LTFDTFSPNTGK              |                  | voltage-dependent anion channel 2 [Mus musculus]                                                    | 1428.6987 | 21.51  | 0           |
| 51765915 | LTLIDPETLLPR              |                  | PREDICTED: TBP-interacting protein [Mus musculus]                                                   | 1380.8041 | 38.74  | 0.694828528 |
| 63476037 | LTLGGPTPNTGAALFEVLR       |                  | PREDICTED: procollagen, type VI, alpha 3 [Mus musculus]                                             | 2040.1495 | 53.89  | 0.191227246 |
| 63501125 | LTQQAGDLTPAGGQR           |                  | PREDICTED: ADP-ribosylation factor interacting protein 1 [Mus musculus]                             | 1611.8563 | 43.2   | 1.41184479  |
| 46575903 | LTSLVPFVDAFQLER           |                  | eukaryotic translation initiation factor 3, subunit 10 (theta) [Mus musculus]                       | 1734.9425 | 35.42  | 1.58780253  |
| 22165384 | LTTPTYGDLNHLVSATMSGVTTCLR |                  | tubulin, beta, 2 [Mus musculus]                                                                     | 2651.3203 | 88.12  | 1.017281544 |
| 33859488 | LTTPTYGDLNHLVSATMSGVTTCLR |                  | tubulin, beta 2 [Mus musculus]                                                                      | 2651.3203 | 88.12  | 1.017281544 |
| 31981939 | LTTPTYGDLNHLVSATMSGVTTCLR |                  | tubulin, beta 4 [Mus musculus]                                                                      | 2651.3203 | 88.12  | 1.017281544 |
| 7106439  | LTTPTYGDLNHLVSATMSGVTTCLR |                  | tubulin, beta 5 [Mus musculus]                                                                      | 2651.3203 | 88.12  | 1.017281544 |

|          |                         |                  |                                                                                                     |           |        |             |
|----------|-------------------------|------------------|-----------------------------------------------------------------------------------------------------|-----------|--------|-------------|
| 51556274 | LVAGEMGQNEPDQGGQR       |                  | hydroxyacyl-Coenzyme A dehydrogenase type II [Mus musculus]                                         | 1785.8291 | 56.15  | 1.369783723 |
| 13385472 | LVAIVDVIDQNR            |                  | ribosomal protein L14 [Mus musculus]                                                                | 1354.7684 | 55.25  | 1.6264073   |
| 6755714  | LVEWIVVQCQGPVGRPDR      |                  | transgelin [Mus musculus]                                                                           | 2038.0461 | 28.39  | 0           |
| 6754524  | LVIITAGAR               |                  | lactate dehydrogenase 1, A chain [Mus musculus]                                                     | 913.5762  | 32.39  | 1.477053597 |
| 6679937  | LVINGKPITIFQER          |                  | similar to glyceraldehyde-3-phosphate dehydrogenase [Mus musculus]                                  | 1627.9432 | 58.12  | 1.057806147 |
| 6679937  | LVINGKPITIFQER          | Deamidation (NQ) | similar to glyceraldehyde-3-phosphate dehydrogenase [Mus musculus]                                  | 1628.9321 | 22.97  | 1.610274551 |
| 6679805  | LVIPSELGYGER            |                  | FK506 binding protein 2 [Mus musculus]                                                              | 1332.7218 | 25.54  | 0           |
| 31980648 | LVLEVAQHLGESTVVR        |                  | ATP synthase, H+ transporting mitochondrial F1 complex, beta subunit [Mus musculus]                 | 1650.926  | 71.8   | 0.938512808 |
| 6755714  | LVNSLYPEGSKPVK          |                  | transgelin [Mus musculus]                                                                           | 1530.8588 | 56.26  | 0.214411538 |
| 63518159 | LVPLLDGTGDIIDGGNSEYR    |                  | PREDICTED: phosphogluconate dehydrogenase [Mus musculus]                                            | 2160.1135 | 61.44  | 1.748436942 |
| 31543942 | LVQAAQMLQSDPYSVPAR      |                  | vinculin [Mus musculus]                                                                             | 1974.0071 | 50.64  | 0.58372608  |
| 6754976  | LVQAFQFTDK              |                  | peroxiredoxin 1 [Mus musculus]                                                                      | 1196.624  | 41.25  | 1.672540833 |
| 31981679 | LVQDVANNTNEEAGDGTATVLR  |                  | heat shock protein 1 (chaperonin) [Mus musculus]                                                    | 2560.252  | 147.1  | 1.296625882 |
| 33859506 | LVQEVDFAK               |                  | albumin 1 [Mus musculus]                                                                            | 1149.6102 | 42.13  | 3.090840526 |
| 24418919 | LVTISIGDVVNHDPVVGDR     |                  | brain glycogen phosphorylase [Mus musculus]                                                         | 1891.9867 | 37.25  | 0           |
| 6680047  | LWDLTTGTTR              |                  | guanine nucleotide binding protein (G protein), beta polypeptide 2 like 1 [Mus musculus]            | 1264.6478 | 64.71  | 1.220905059 |
| 31560517 | LWTLVSEQTR              |                  | ribosomal protein L27a [Mus musculus]                                                               | 1232.6614 | 23.75  | 1.622281214 |
| 6753010  | LYAYEPSDTALLYDNMK       |                  | anterior gradient 2 [Mus musculus]                                                                  | 2006.9382 | 96.01  | 0.421710993 |
| 6753304  | LYGPSSVSFADDFVR         |                  | serine (or cysteine) proteinase inhibitor, clade H, member 1 [Mus musculus]                         | 1659.8036 | 106.13 | 1.169619559 |
| 31981722 | LYGSGPPPTGEEDTSEKDEL    |                  | heat shock 70kD protein 5 (glucose-regulated protein) [Mus musculus]                                | 2177.9937 | 68.23  | 1.052537999 |
| 6753266  | LYPIANGNNQSPIDIK        | Deamidation (NQ) | carbonic anhydrase 1 [Mus musculus]                                                                 | 1756.926  | 89.57  | 0           |
| 6753266  | LYPIANGNNQSPIDIK        |                  | carbonic anhydrase 1 [Mus musculus]                                                                 | 1757.9132 | 78.64  | 0           |
| 6753428  | LYPPSAEYDPLR            |                  | creatine kinase, mitochondrial 1, ubiquitous [Mus musculus]                                         | 1420.7179 | 36.15  | 4.973001392 |
| 31542333 | LYQPEYQEVSTEEQR         |                  | hypoxia up-regulated 1 [Mus musculus]                                                               | 1898.8834 | 75.24  | 0.999116956 |
| 16716589 | LYTLVTVYVPVTFK          |                  | ribosomal protein L31 [Mus musculus]                                                                | 1644.9158 | 50.32  | 1.966019058 |
| 33563250 | MALDVEIATYR             |                  | desmin [Mus musculus]                                                                               | 1281.6512 | 60.66  | 0           |
| 34610207 | MALELLTQEFQIPVER        |                  | alanyl-tRNA synthetase [Mus musculus]                                                               | 1845.9834 | 28.94  | 0           |
| 7305295  | MAQQMLDLEEQLEEEEAAR     | 2 Oxidation (M)  | myosin, heavy polypeptide 11, smooth muscle [Mus musculus]                                          | 2263.0425 | 46.39  | 0.199761282 |
| 7305295  | MAQQMLDLEEQLEEEEAAR     | Oxidation (M)    | myosin, heavy polypeptide 11, smooth muscle [Mus musculus]                                          | 2295.0374 | 29.2   | 0           |
| 7305295  | MAQQMLDLEEQLEEEEAAR     |                  | myosin, heavy polypeptide 11, smooth muscle [Mus musculus]                                          | 2279.0281 | 67.64  | 0.352039864 |
| 18079351 | MAVFGFEMSEDAGPDGALLPR   |                  | major vault protein [Mus musculus]                                                                  | 2210.0452 | 24.01  | 0           |
| 6679687  | MDATANDVPSPYEVK         |                  | glucose regulated protein [Mus musculus]                                                            | 1636.7621 | 52.39  | 1.285822807 |
| 63746482 | MDCQECPEGYR             |                  | PREDICTED: filamin, alpha [Mus musculus]                                                            | 1330.4949 | 44.15  | 0           |
| 7305505  | MEPDPAEPPSTTVEAANGAEQAR |                  | smoothelin [Mus musculus]                                                                           | 2368.0881 | 88.27  | 1.843019336 |
| 21450625 | MFVLDEADEMLSR           |                  | eukaryotic translation initiation factor 4A1 [Mus musculus]                                         | 1555.7192 | 72.02  | 1.980966748 |
| 7305019  | MFVLDEADEMLSR           |                  | eukaryotic translation initiation factor 4A2 [Mus musculus]                                         | 1555.7192 | 72.02  | 1.980966748 |
| 25020120 | MGQGSPGDALVPSGEQLR      |                  | PREDICTED: laminin, alpha 5 [Mus musculus]                                                          | 1798.877  | 33.84  | 0           |
| 25020120 | MGQGSPGDALVPSGEQLR      | Deamidation (NQ) | PREDICTED: laminin, alpha 5 [Mus musculus]                                                          | 1799.8636 | 35.5   | 2.116355252 |
| 31980685 | MIEQDDFDINTR            |                  | glucosamine [Mus musculus]                                                                          | 1496.6755 | 21.07  | 2.03961094  |
| 21704206 | MIPAVVDGEFFPR           |                  | carboxylesterase 2 [Mus musculus]                                                                   | 1477.7484 | 25.73  | 0.697188857 |
| 29336026 | MIQALELDPNLYR           |                  | nonmuscle myosin heavy chain [Mus musculus]                                                         | 1575.8204 | 26.93  | 1.18064725  |
| 6671571  | MLAEDEL                 |                  | ADP-ribosylation factor 2 [Mus musculus]                                                            | 976.4744  | 30.18  | 1.527064176 |
| 11230802 | MLDAEDIVNTARPDEK        |                  | actinin alpha 4 [Mus musculus]                                                                      | 1816.8718 | 19.32  | 1.359802562 |
| 6681157  | MLDMGFEPQIR             |                  | DEAD (Asp-Glu-Ala-Asp) box polypeptide 5 [Mus musculus]                                             | 1336.6403 | 38.14  | 1.925082349 |
| 6753620  | MLDMGFEPQIR             |                  | DEAD/H (Asp-Glu-Ala-Asp/His) box polypeptide 3, X-linked [Mus musculus]                             | 1336.6403 | 38.14  | 1.925082349 |
| 7305505  | MLDQTTNFEER             |                  | smoothelin [Mus musculus]                                                                           | 1383.6282 | 57.74  | 0.733048113 |
| 6679891  | MLDYLQGSGETPQTDIR       |                  | alpha glucosidase 2 alpha neutral subunit [Mus musculus]                                            | 1923.9143 | 68.11  | 1.368045318 |
| 10092608 | MLLADQGSQSWK            |                  | glutathione S-transferase, pi 1 [Mus musculus]                                                      | 1276.6339 | 37.72  | 0           |
| 6753320  | MLLDPMGIVMTNDGNAILR     |                  | chaperonin subunit 3 (gamma) [Mus musculus]                                                         | 2131.0715 | 47.98  | 0.911630552 |
| 31982290 | MLYDMENPPADDYFGR        |                  | LIM domain containing preferred translocation partner in lipoma [Mus musculus]                      | 1933.8207 | 81.07  | 0           |
| 6996911  | MPEFYNR                 |                  | argininosuccinate synthetase [Mus musculus]                                                         | 956.4271  | 29.61  | 0.747259715 |
| 6679465  | MPPYDEETQAIIDAAQEAR     |                  | protein kinase C substrate 80K-H [Mus musculus]                                                     | 2147.9929 | 36.61  | 1.398906399 |
| 6678359  | MPTPPSYK                |                  | transketolase [Mus musculus]                                                                        | 920.4485  | 47.87  | 1.384443844 |
| 8394269  | MQQFDLLFR               |                  | ST6 (alpha-N-acetyl-neuraminyl-2,3-beta-galactosyl-1,3)-N-acetylgalactosaminide alpha-2,6-sialyltra | 1199.5574 | 33.34  | 2.130145099 |
| 20137006 | MQQNIQELEEQLLEESAR      |                  | myosin, heavy polypeptide 9, non-muscle [Mus musculus]                                              | 2333.0627 | 107.53 | 2.051918218 |
| 50355692 | MQQQLDEYQELLDIK         |                  | lamin A isoform A [Mus musculus]                                                                    | 1893.9363 | 82.35  | 1.275531652 |
| 50355692 | MQQQLDEYQELLDIK         | Deamidation (NQ) | lamin A isoform A [Mus musculus]                                                                    | 1894.9323 | 45.58  | 0           |
| 64427157 | MQSSVSESSFQMR           |                  | PREDICTED: synaptopodin 2 [Mus musculus]                                                            | 1560.6898 | 39.93  | 0           |
| 22165384 | MSATFIGNSTAIQELFK       |                  | tubulin, beta, 2 [Mus musculus]                                                                     | 1857.9504 | 108.3  | 1.146485908 |
| 33859488 | MSATFIGNSTAIQELFK       |                  | tubulin, beta 2 [Mus musculus]                                                                      | 1857.9504 | 108.3  | 1.146485908 |

|          |                            |                    |                                                                                                     |           |        |             |
|----------|----------------------------|--------------------|-----------------------------------------------------------------------------------------------------|-----------|--------|-------------|
| 31560689 | MSPEEFTEIMNQR              |                    | 3-hydroxy-3-methylglutaryl-Coenzyme A synthase 2 [Mus musculus]                                     | 1611.7097 | 56.78  | 0.375417304 |
| 6679108  | MSVQPTVSLGGFEITPPVVLK      |                    | nucleophosmin 1 [Mus musculus]                                                                      | 2227.2112 | 34.14  | 1.401230456 |
| 6679108  | MTDQEAIQDLWQWR             |                    | nucleophosmin 1 [Mus musculus]                                                                      | 1819.8579 | 46.42  | 1.58116895  |
| 56119103 | MTGSEFDFFEMKR              |                    | guanosine diphosphate (GDP) dissociation inhibitor 3 [Mus musculus]                                 | 1606.7015 | 29.57  | 1.791111891 |
| 6678573  | MVDDGSGEVQVWR              |                    | villin 1 [Mus musculus]                                                                             | 1477.6813 | 65.58  | 1.609296127 |
| 6755809  | MVGGIAQIIAAQEEMLR          |                    | talin 1 [Mus musculus]                                                                              | 1829.9641 | 65.67  | 0.540563251 |
| 33859811 | MVGVPAAFDMMLTGR            |                    | hydroxyacyl-Coenzyme A dehydrogenase/3-ketoacyl-Coenzyme A thiolase/enoyl-Coenzyme A hydratase (tri | 1595.7827 | 49.51  | 1.413379833 |
| 63600542 | MWEIQNFSAIQK               | 3 Deamidation (NQ) | PREDICTED: similar to guanylate-binding protein 5 [Mus musculus]                                    | 1497.7046 | 20.92  | 0           |
| 8393144  | MYDSVLALPGALQATR           |                    | claudin 7 [Mus musculus]                                                                            | 1705.8947 | 34.07  | 1.688017005 |
| 13384828 | MYGADLAPVDFLHASEDAR        |                    | serine (or cysteine) proteinase inhibitor, clade B, member 1a [Mus musculus]                        | 2077.9724 | 87.97  | 1.701704619 |
| 51766008 | MYQAVLDATQR                |                    | PREDICTED: myosin IA [Mus musculus]                                                                 | 1295.6384 | 23.47  | 0           |
| 13937355 | MYSYVTEELPQLINANFPVDPQR    |                    | esterase D/formylglutathione hydrolase [Mus musculus]                                               | 2724.3101 | 27.52  | 1.145198184 |
| 63476037 | NAGPEFQYIR                 |                    | PREDICTED: procollagen, type VI, alpha 3 [Mus musculus]                                             | 1194.5917 | 54.27  | 0.281465312 |
| 22267442 | NALANPLYCPDYR              |                    | ubiquinol cytochrome c reductase core protein 2 [Mus musculus]                                      | 1509.7212 | 35.27  | 0.729253874 |
| 63476037 | NANPSELEQIVLSPAFILAAESLPK  |                    | PREDICTED: procollagen, type VI, alpha 3 [Mus musculus]                                             | 2651.4146 | 95.55  | 0           |
| 30023842 | NAPAIIFIDELDAIAPK          |                    | valosin containing protein [Mus musculus]                                                           | 1810.9962 | 89.97  | 1.05404618  |
| 21313162 | NATNVEQAFMTMAAEIK          |                    | RAB1B, member RAS oncogene family [Mus musculus]                                                    | 1868.8927 | 63.47  | 0           |
| 6679587  | NATNVEQSFMTMAAEIK          | Deamidation (NQ)   | RAB1, member RAS oncogene family [Mus musculus]                                                     | 1884.895  | 51.84  | 1.013861157 |
| 6679587  | NATNVEQSFMTMAAEIK          |                    | RAB1, member RAS oncogene family [Mus musculus]                                                     | 1885.8981 | 42.35  | 0.424808914 |
| 31982275 | NAVVEYVYEMR                |                    | heat shock protein 4 [Mus musculus]                                                                 | 1402.6324 | 29.72  | 0           |
| 6754256  | NAVITVPAYFNDSQR            |                    | heat shock protein 9A [Mus musculus]                                                                | 1694.8517 | 75.05  | 1.169575252 |
| 18079339 | NAVITQEFQVVPDTR            |                    | aconitase 2, mitochondrial [Mus musculus]                                                           | 1601.8119 | 45.15  | 0.987421397 |
| 6677813  | NCIVLIDSTPYR               |                    | ribosomal protein S8 [Mus musculus]                                                                 | 1393.7097 | 47.74  | 5.52286837  |
| 63737134 | NCVHVATVMDRFR              | Deamidation (NQ)   | PREDICTED: similar to family with sequence similarity 26, member A [Mus musculus]                   | 1548.7673 | 21.32  | 0           |
| 31712036 | NDFQLIGIQDGYLSLLQDSGEVR    |                    | eukaryotic translation initiation factor 5A [Mus musculus]                                          | 2580.2869 | 42.92  | 1.488953722 |
| 9790067  | NDISSHPPVEGSYAPR           |                    | staphylococcal nuclease domain containing 1 [Mus musculus]                                          | 1725.8265 | 34.88  | 2.543752803 |
| 33667042 | NDQDTWDYTNPNLSGGQDPSGNPNKR |                    | heterogeneous nuclear ribonucleoprotein L [Mus musculus]                                            | 2890.2598 | 68.31  | 1.225304729 |
| 9790247  | NDVFDLSGISPDLLPDDFVR       |                    | ubiquitin-like 1 (sentrin) activating enzyme subunit 1 [Mus musculus]                               | 2234.0996 | 57.55  | 1.740514483 |
| 21313536 | NDVITVQTPAFAESVTEGDVR      |                    | dihydroliipoamide S-succinyltransferase (E2 component of 2-oxo-glutarate complex) [Mus musculus]    | 2248.0935 | 39.97  | 0.935160389 |
| 6755929  | NEAIAAAHDSVAQKGQCR         | Deamidation (NQ)   | ubiquitin carboxy-terminal hydrolase L1 [Mus musculus]                                              | 1926.8867 | 29.91  | 0.512888421 |
| 6678483  | NEEDATELVGLAQAVNAR         |                    | ubiquitin-activating enzyme E1, Chr X [Mus musculus]                                                | 1899.943  | 106.05 | 1.256040058 |
| 6671684  | NEGVATYAAAVLFR             |                    | catenin beta [Mus musculus]                                                                         | 1481.7728 | 56.65  | 1.955417464 |
| 13384720 | NFDDEDVFNIPR               |                    | NADH dehydrogenase (ubiquinone) 1 alpha subcomplex, 9 [Mus musculus]                                | 1611.7877 | 43.77  | 1.587682049 |
| 34996495 | NFESLSEAFSVASAAAALSQNR     |                    | ribophorin II [Mus musculus]                                                                        | 2270.1138 | 68.31  | 0.789333778 |
| 7305443  | NFGIGQDIQPK                |                    | ribosomal protein L7a [Mus musculus]                                                                | 1216.6272 | 41.5   | 0           |
| 7949051  | NFILDQTNVSAAAQR            | Deamidation (NQ)   | heterogenous nuclear ribonucleoprotein U [Mus musculus]                                             | 1647.8558 | 69.44  | 1.432960545 |
| 7949051  | NFILDQTNVSAAAQR            |                    | heterogenous nuclear ribonucleoprotein U [Mus musculus]                                             | 1648.8439 | 43.49  | 1.440017824 |
| 20137006 | NFINNPLAQADWAAK            | Deamidation (NQ)   | myosin, heavy polypeptide 9, non-muscle [Mus musculus]                                              | 1672.8231 | 39.21  | 0           |
| 20137006 | NFINNPLAQADWAAK            |                    | myosin, heavy polypeptide 9, non-muscle [Mus musculus]                                              | 1673.8425 | 29.39  | 2.087114295 |
| 51556274 | NFLASQVPPFSR               |                    | hydroxyacyl-Coenzyme A dehydrogenase type II [Mus musculus]                                         | 1362.7175 | 30.63  | 0.870249838 |
| 33859490 | NFLTEDSADLDSIEAVANEVLK     |                    | laminin B1 subunit 1 [Mus musculus]                                                                 | 2393.1724 | 54.93  | 0           |
| 7305295  | NFMNSPMAQADWVAK            |                    | myosin, heavy polypeptide 11, smooth muscle [Mus musculus]                                          | 1709.785  | 69.27  | 0           |
| 22203747 | NFVINVVNR                  |                    | procollagen, type VI, alpha 2 [Mus musculus]                                                        | 1074.5999 | 35.01  | 0.254345934 |
| 6681157  | NFYQEHPDLAR                |                    | DEAD (Asp-Glu-Ala-Asp) box polypeptide 5 [Mus musculus]                                             | 1389.6577 | 22.33  | 2.431693472 |
| 6755302  | NGDGFVSLLEEFGLDGR          |                    | reticulocalbin 2 [Mus musculus]                                                                     | 1817.8691 | 20.44  | 0.791220909 |
| 34328108 | NGDRGETGPAGPAGPAGAR        |                    | procollagen, type I, alpha 1 [Mus musculus]                                                         | 1974.9835 | 66.85  | 0           |
| 6678483  | NGFLNLALPFFGFSEPLAAPR      |                    | ubiquitin-activating enzyme E1, Chr X [Mus musculus]                                                | 2278.1909 | 24.42  | 0           |
| 63487095 | NGNGGPGPYVQAGTATLPR        |                    | PREDICTED: catenin src [Mus musculus]                                                               | 1883.9423 | 58.87  | 0           |
| 63746482 | NGQHVASSPIPVVISQSEIGDASR   |                    | PREDICTED: filamin, alpha [Mus musculus]                                                            | 2448.2527 | 27.45  | 0           |
| 20806532 | NGYGFNR                    |                    | cold shock domain protein A short isoform [Mus musculus]                                            | 940.4583  | 34.51  | 1.955683844 |
| 6756033  | NGYGFNR                    |                    | nuclease sensitive element binding protein 1 [Mus musculus]                                         | 940.4583  | 34.51  | 1.955683844 |
| 27229204 | NIIDPTFR                   |                    | chitinase, di-N-acetyl- [Mus musculus]                                                              | 975.5234  | 26.66  | 1.398950995 |
| 31560611 | NIIGLQMGTNK                |                    | calponin 1 [Mus musculus]                                                                           | 1188.6333 | 75.11  | 0           |
| 31560611 | NIIGLQMGTNK                | Oxidation (M)      | calponin 1 [Mus musculus]                                                                           | 1204.6218 | 29.66  | 0           |
| 31543605 | NIQVDSPTYDISR              |                    | ribophorin I [Mus musculus]                                                                         | 1406.6967 | 37.05  | 0.880348922 |
| 33563250 | NISEAEWYK                  |                    | desmin [Mus musculus]                                                                               | 1268.5781 | 67.33  | 0           |
| 34996495 | NIVEEIEDLVAR               |                    | ribophorin II [Mus musculus]                                                                        | 1399.7494 | 67.71  | 1.205903213 |
| 21704100 | NIVVVEGVR                  |                    | hydroxyacyl-Coenzyme A dehydrogenase/3-ketoacyl-Coenzyme A thiolase/enoyl-Coenzyme A hydratase (tri | 984.5803  | 28.98  | 2.909031396 |
| 33620739 | NKDQGTIEDYVEGLR            |                    | myosin, light polypeptide 6, alkali, smooth muscle and non-muscle [Mus musculus]                    | 1786.8185 | 24.29  | 0           |
| 6755901  | NLDIERPTYTNLNR             |                    | tubulin, alpha 1 [Mus musculus]                                                                     | 1718.8997 | 48.01  | 0.983199804 |

|          |                          |                                                                                                      |           |        |             |
|----------|--------------------------|------------------------------------------------------------------------------------------------------|-----------|--------|-------------|
| 34740335 | NLDIERPTYTNLNR           | tubulin, alpha 2 [Mus musculus]                                                                      | 1718.8997 | 48.01  | 0.983199804 |
| 6678467  | NLDIERPTYTNLNR           | tubulin, alpha 4 [Mus musculus]                                                                      | 1718.8997 | 48.01  | 0.983199804 |
| 6678469  | NLDIERPTYTNLNR           | tubulin, alpha 6 [Mus musculus]                                                                      | 1718.8997 | 48.01  | 0.983199804 |
| 6678499  | NLFFSTNIDDAIR            | UDP-glucose dehydrogenase [Mus musculus]                                                             | 1525.7671 | 57.43  | 0.478990383 |
| 40254595 | NLHQSGFSLSGAQIDDNIPR     | dihydropyrimidinase-like 2 [Mus musculus]                                                            | 2169.0645 | 43.67  | 0.464263957 |
| 20137006 | NLPYSEEVIMYK             | myosin, heavy polypeptide 9, non-muscle [Mus musculus]                                               | 1727.8451 | 54.42  | 1.515655959 |
| 12963531 | NLPQYYSNELLEEAFFSVGQVER  | non-POU-domain-containing, octamer binding protein [Mus musculus]                                    | 2668.3149 | 40.82  | 1.642714888 |
| 31982755 | NLQEAEEWYK               | vimentin [Mus musculus]                                                                              | 1309.6183 | 31.67  | 0           |
| 6678365  | NLQYYDISAK               | RAN, member RAS oncogene family [Mus musculus]                                                       | 1214.618  | 30.97  | 1.977173476 |
| 23956214 | NLSPYVSNELLEEAFFSQFGPIER | splicing factor proline/glutamine rich (polypyrimidine tract binding protein associated) [Mus muscu] | 2639.3054 | 34.78  | 1.830639861 |
| 6678359  | NMAEQIIQEIYSQVQSK        | transketolase [Mus musculus]                                                                         | 2009.0073 | 81.11  | 2.810881253 |
| 29336026 | NMDPLNDNVAALLHQSTDR      | nonmuscle myosin heavy chain [Mus musculus]                                                          | 2124.0298 | 26.89  | 0.778320393 |
| 7305295  | NMDPLNDNVTSLLNASSDK      | myosin, heavy polypeptide 11, smooth muscle [Mus musculus]                                           | 2047.9559 | 102.35 | 0.298627875 |
| 7305295  | NMDPLNDNVTSLLNASSDK      | myosin, heavy polypeptide 11, smooth muscle [Mus musculus]                                           | 2063.9473 | 87.22  | 0           |
| 7949053  | NMGGPYGGGNYGPGSGGGGGYGR  | heterogeneous nuclear ribonucleoprotein A2/B1 isoform 1 [Mus musculus]                               | 2189.9172 | 154.55 | 1.542492522 |
| 7949053  | NMGGPYGGGNYGPGSGGGGGYGR  | heterogeneous nuclear ribonucleoprotein A2/B1 isoform 1 [Mus musculus]                               | 2205.9036 | 20.87  | 1.421786468 |
| 21450277 | NMVPQQALVIR              | Na <sup>+</sup> /K <sup>+</sup> -ATPase alpha 1 subunit [Mus musculus]                               | 1268.7145 | 46.73  | 1.354926846 |
| 6678145  | NNEDVSIIPPLFTVSVSDHR     | signal sequence receptor, delta [Mus musculus]                                                       | 2152.1062 | 52.31  | 1.551327625 |
| 6678145  | NNEDVSIIPPLFTVSVSDHR     | signal sequence receptor, delta [Mus musculus]                                                       | 2153.1077 | 35.33  | 0           |
| 6679599  | NNIPYFETSAK              | RAB7, member RAS oncogene family [Mus musculus]                                                      | 1283.6298 | 30.44  | 1.47918128  |
| 51491845 | NNLAGAEELFAR             | clathrin, heavy polypeptide (Hc) [Mus musculus]                                                      | 1304.6661 | 58.85  | 1.497233377 |
| 22203747 | NNYATMRPDSTEIDQDTINR     | procollagen, type VI, alpha 2 [Mus musculus]                                                         | 2354.075  | 51.26  | 0.273348158 |
| 22203747 | NNYATMRPDSTEIDQDTINR     | procollagen, type VI, alpha 2 [Mus musculus]                                                         | 2355.0664 | 64.07  | 0           |
| 22203747 | NNYATMRPDSTEIDQDTINR     | procollagen, type VI, alpha 2 [Mus musculus]                                                         | 2370.0723 | 23.68  | 0           |
| 63530525 | NPAVLSAASFDR             | PREDICTED: SEC31-like 1 [Mus musculus]                                                               | 1304.6631 | 34.81  | 1.39156083  |
| 6754254  | NPDDITNEEYGEFYK          | heat shock protein 1, alpha [Mus musculus]                                                           | 1833.7954 | 105.01 | 1.291754214 |
| 40556608 | NPDDITQEEYGEFYK          | heat shock protein 1, beta [Mus musculus]                                                            | 1847.8032 | 104.35 | 1.542881288 |
| 63518159 | NPELQNLDDFFK             | PREDICTED: phosphogluconate dehydrogenase [Mus musculus]                                             | 1705.8832 | 58.23  | 1.637400105 |
| 8567402  | NPPGFAFVEFDR             | splicing factor, arginine/serine-rich 3 (SRp20) [Mus musculus]                                       | 1621.7761 | 45.44  | 1.705730211 |
| 46559834 | NQALELEQLR               | desmuslin isoform M [Mus musculus]                                                                   | 1213.6531 | 55.91  | 0.168200607 |
| 18875324 | NQAPGQPGASQWGSR          | DAZ associated protein 1 [Mus musculus]                                                              | 1540.7279 | 28.35  | 1.350842524 |
| 33563270 | NQGYDYVVKPR              | oxoglutarate dehydrogenase (lipoamide) [Mus musculus]                                                | 1402.6827 | 29.16  | 1.116045142 |
| 547749   | NQILNLTDDNANILLQIDNAR    | Keratin, type I cytoskeletal 10 (Cytokeratin 10) (K10) (CK 10)                                       | 2367.2517 | 70.68  | 0           |
| 31981722 | NQLTSPNPENTVFDK          | heat shock 70kD protein 5 (glucose-regulated protein) [Mus musculus]                                 | 1677.8168 | 85.58  | 0.865109508 |
| 6754482  | NQNINLENSLGDVEAR         | keratin complex 1, acidic, gene 18 [Mus musculus]                                                    | 1785.8744 | 103.03 | 1.34630481  |
| 6754482  | NQNINLENSLGDVEAR         | keratin complex 1, acidic, gene 18 [Mus musculus]                                                    | 1788.8188 | 50.91  | 0           |
| 20149720 | NQNLQEALQR               | oxidized low density lipoprotein (lectin-like) receptor 1 [Mus musculus]                             | 1216.5865 | 24.03  | 0           |
| 31981690 | NQVAMNPNTVFDK            | heat shock protein 8 [Mus musculus]                                                                  | 1649.7949 | 79.94  | 0.933018656 |
| 63660799 | NRCVLPNR                 | PREDICTED: similar to Dual specificity protein phosphatase 13 (Testis- and skeletal-muscle-specific) | 972.49    | 19.98  | 0           |
| 21361250 | NRLFQENSLNLSLPLNSLSR     | ATPase, H <sup>+</sup> transporting, lysosomal accessory protein 2 [Mus musculus]                    | 2320.1775 | 19.47  | 0           |
| 46849705 | NSFMNGSWGAEER            | lectin, galactose binding, soluble 4 [Mus musculus]                                                  | 1484.6311 | 100.14 | 1.922969324 |
| 31542083 | NSGSFSSPSISPR            | mitochondrial tumor suppressor 1 isoform 2 [Mus musculus]                                            | 1322.6389 | 19.32  | 0           |
| 7305295  | NSLQDQLDEEMAK            | myosin, heavy polypeptide 11, smooth muscle [Mus musculus]                                           | 1649.7478 | 71.29  | 0.49954304  |
| 54020742 | NSNILEDLETLR             | archain 1 [Mus musculus]                                                                             | 1416.7368 | 45.27  | 1.511677877 |
| 50355692 | NSNLVGAHEELQQSR          | lamin A isoform A [Mus musculus]                                                                     | 1752.8673 | 88.01  | 1.036119999 |
| 22165384 | NSSYFVEWIPNNVK           | tubulin, beta, 2 [Mus musculus]                                                                      | 1696.8463 | 41.23  | 0.334827824 |
| 33859488 | NSSYFVEWIPNNVK           | tubulin, beta 2 [Mus musculus]                                                                       | 1696.8463 | 41.23  | 0.334827824 |
| 12963615 | NSSYFVEWIPNNVK           | tubulin, beta 3 [Mus musculus]                                                                       | 1696.8463 | 41.23  | 0.334827824 |
| 31981939 | NSSYFVEWIPNNVK           | tubulin, beta 4 [Mus musculus]                                                                       | 1696.8463 | 41.23  | 0.334827824 |
| 7106439  | NSSYFVEWIPNNVK           | tubulin, beta 5 [Mus musculus]                                                                       | 1696.8463 | 41.23  | 0.334827824 |
| 27754056 | NSSYFVEWIPNNVK           | tubulin, beta 6 [Mus musculus]                                                                       | 1696.8463 | 41.23  | 0.334827824 |
| 31981562 | NTGICTIGPASR             | pyruvate kinase 3 [Mus musculus]                                                                     | 1302.6801 | 27     | 1.014768825 |
| 46195798 | NTLLIAGLQAR              | dolichyl-di-phosphooligosaccharide-protein glycotransferase [Mus musculus]                           | 1169.6924 | 38.18  | 0           |
| 33563270 | NTNAGAPPGTAYQSPLSLSR     | oxoglutarate dehydrogenase (lipoamide) [Mus musculus]                                                | 2002.0035 | 37.51  | 0.926260194 |
| 33859560 | NTNDANSCQIIPQNVNR        | guanosine diphosphate (GDP) dissociation inhibitor 1 [Mus musculus]                                  | 2142.0415 | 94.15  | 1.124881347 |
| 56119103 | NTNDANSCQIIPQNVNR        | guanosine diphosphate (GDP) dissociation inhibitor 3 [Mus musculus]                                  | 2142.0415 | 94.15  | 1.124881347 |
| 6754556  | NTSEQDQPMGGWEMIR         | lamin B1 [Mus musculus]                                                                              | 1878.823  | 53.6   | 1.209624262 |
| 18700004 | NTTPDELLSAVLTAVLQDVR     | acetyl-Coenzyme A acyltransferase 1 [Mus musculus]                                                   | 2155.1602 | 29.8   | 1.28327662  |
| 8567336  | NVAILIPESWK              | chloride channel calcium activated 3 [Mus musculus]                                                  | 1269.7167 | 38.7   | 2.20384122  |
| 6753364  | NVFDEAILAALPEPEPK        | cell division cycle 42 homolog [Mus musculus]                                                        | 1852.9755 | 75.43  | 1.401118947 |

|          |                               |                    |                                                                                                     |           |        |             |
|----------|-------------------------------|--------------------|-----------------------------------------------------------------------------------------------------|-----------|--------|-------------|
| 6678986  | NVLDTSWPTPPALR                |                    | myosin IC [Mus musculus]                                                                            | 1663.8625 | 25.35  | 0           |
| 547749   | NVSTGDVNVEMNAAPGVDLTQLLNMR    |                    | Keratin, type I cytoskeletal 10 (Cytokeratin 10) (K10) (CK 10)                                      | 2872.3884 | 50.74  | 0           |
| 6756033  | NYQQNYQNSESEGEKNEGESAPEGQAQQR |                    | nuclease sensitive element binding protein 1 [Mus musculus]                                         | 3257.3884 | 106.73 | 1.633682023 |
| 7949053  | NYEYQWKG                      |                    | heterogeneous nuclear ribonucleoprotein A2/B1 isoform 1 [Mus musculus]                              | 1087.4894 | 47.6   | 1.329937087 |
| 51771420 | NYGYGQGYR                     |                    | PREDICTED: hypothetical protein LOC68693 [Mus musculus]                                             | 1183.5217 | 26.54  | 1.46850441  |
| 6671549  | PGLLLDGEAPNFEANTTIGR          |                    | peroxiredoxin 6 [Mus musculus]                                                                      | 2142.1096 | 35.47  | 2.922110611 |
| 16716467 | PLELELCPGR                    |                    | N-acetylneuraminic acid synthase (sialic acid synthase) [Mus musculus]                              | 1126.5891 | 24.81  | 1.637674622 |
| 6754084  | PMILGYWNVNVR                  |                    | glutathione S-transferase, mu 1 [Mus musculus]                                                      | 1248.6559 | 19.17  | 0           |
| 21450277 | QAADMILLDDNFASIVTGVEEGR       |                    | Na+/K+ -ATPase alpha 1 subunit [Mus musculus]                                                       | 2464.2002 | 95.65  | 0           |
| 7305295  | QADLEKEELAEELASSLSGR          |                    | myosin, heavy polypeptide 11, smooth muscle [Mus musculus]                                          | 2175.0828 | 129.09 | 0.300164455 |
| 7304881  | QAFQIGSPWR                    |                    | aldehyde dehydrogenase family 1, subfamily A1 [Mus musculus]                                        | 1189.6079 | 25.61  | 0.356277747 |
| 7106242  | QAFQIGSPWR                    |                    | aldehyde dehydrogenase family 1, subfamily A7 [Mus musculus]                                        | 1189.6079 | 25.61  | 0.356277747 |
| 6753294  | QALQDLLSEYMGNAGR              |                    | catenin alpha 1 [Mus musculus]                                                                      | 1765.8821 | 20.07  | 1.325527009 |
| 20137006 | QAQQRDELDAEIANSSGK            |                    | myosin, heavy polypeptide 9, non-muscle [Mus musculus]                                              | 2088.9983 | 19.59  | 0           |
| 27369806 | QASLSQHIR                     | 2 Deamidation (NQ) | rhomboid-like protein 6 [Mus musculus]                                                              | 991.4896  | 30.65  | 0           |
| 6754256  | QAVTNPNTFYATK                 |                    | heat shock protein 9A [Mus musculus]                                                                | 1568.7754 | 29.4   | 1.067879602 |
| 63489754 | QDEVNAAWQR                    |                    | PREDICTED: similar to Spectrin alpha chain, brain (Spectrin, non-erythroid alpha chain) (Alpha-II s | 1216.5748 | 35.16  | 2.238285489 |
| 6996913  | QDIAFAYQR                     |                    | annexin A2 [Mus musculus]                                                                           | 1111.5573 | 40.07  | 2.204983152 |
| 31791057 | QDIAVISDSYFPR                 |                    | laminin, gamma 1 [Mus musculus]                                                                     | 1510.7487 | 64.79  | 0.896875665 |
| 6754854  | QDLGSPGIALDHLGR               |                    | nidogen 1 [Mus musculus]                                                                            | 1677.8567 | 41.09  | 0           |
| 6671571  | QDLPNAMNAEITDK                |                    | ADP-ribosylation factor 2 [Mus musculus]                                                            | 1630.7793 | 76.34  | 2.896322642 |
| 63487095 | QDVYGPQPQVR                   |                    | PREDICTED: catenin src [Mus musculus]                                                               | 1286.6504 | 33.52  | 1.695266696 |
| 55742711 | QEELESVEAGVQGGAFEGTR          |                    | EH-domain containing 2 [Mus musculus]                                                               | 2092.9858 | 89.13  | 0           |
| 7305295  | QELEEILHEMEAR                 |                    | myosin, heavy polypeptide 11, smooth muscle [Mus musculus]                                          | 1626.7874 | 79.25  | 0           |
| 21450129 | QEQDTYALSSYTR                 |                    | acetyl-Coenzyme A acetyltransferase 1 precursor [Mus musculus]                                      | 1561.7231 | 88     | 1.350985132 |
| 51770846 | QEQLSGRGSYPR                  | Deamidation (NQ)   | PREDICTED: hypothetical protein XP_488848 [Mus musculus]                                            | 1491.749  | 28.64  | 0           |
| 6671507  | QEYDEAGPSIVHR                 |                    | actin, alpha 2, smooth muscle, aorta [Mus musculus]                                                 | 1500.7261 | 73     | 0.624034859 |
| 6671507  | QEYDEAGPSIVHR                 | Deamidation (NQ)   | actin, alpha 2, smooth muscle, aorta [Mus musculus]                                                 | 1501.7206 | 20     | 0           |
| 6671509  | QEYDESGPSIVHR                 |                    | actin, beta, cytoplasmic [Mus musculus]                                                             | 1516.7296 | 78.79  | 1.513661501 |
| 63694749 | QEYDESGPSIVHR                 |                    | PREDICTED: similar to cytoplasmic beta-actin [Mus musculus]                                         | 1516.7296 | 78.79  | 1.513661501 |
| 63476037 | QFGVAPLTIAR                   |                    | PREDICTED: procollagen, type VI, alpha 3 [Mus musculus]                                             | 1172.6782 | 51.96  | 1.696338744 |
| 21450625 | QFYINVER                      |                    | eukaryotic translation initiation factor 4A1 [Mus musculus]                                         | 1068.5468 | 29.03  | 1.530462726 |
| 7305019  | QFYINVER                      |                    | eukaryotic translation initiation factor 4A2 [Mus musculus]                                         | 1068.5468 | 29.03  | 1.530462726 |
| 22164798 | QFYPDILIR                     |                    | selenium binding protein 1 [Mus musculus]                                                           | 1051.5538 | 26.3   | 1.455118909 |
| 21450277 | QGAIVAVTGDGVNDSPALK           |                    | Na+/K+ -ATPase alpha 1 subunit [Mus musculus]                                                       | 1811.9327 | 25.63  | 0           |
| 7106451  | QGIETPEDQNDLRK                | Deamidation (NQ)   | zinc finger protein 162 [Mus musculus]                                                              | 1643.8099 | 43.69  | 0           |
| 6680748  | QQQYSPMAIEEQVAIVYAGVR         |                    | ATP synthase, H+ transporting, mitochondrial F1 complex, alpha subunit, isoform 1 [Mus musculus]    | 2309.1626 | 96.18  | 1.06015141  |
| 9845299  | QGTFFHSQQALEYGTK              |                    | succinate-CoA ligase, GDP-forming, alpha subunit [Mus musculus]                                     | 1694.8237 | 58.44  | 0           |
| 51764087 | QIFLGGVDR                     |                    | PREDICTED: solute carrier family 25 (mitochondrial carrier, adenine nucleotide translocator), membe | 1004.5381 | 31.04  | 0           |
| 6679607  | QIIQQNPSSLPALLQQIGR           |                    | RAD23b homolog [Mus musculus]                                                                       | 2130.2292 | 29.76  | 0           |
| 6753294  | QIIVDPLSFSEER                 |                    | catenin alpha 1 [Mus musculus]                                                                      | 1532.7921 | 32.24  | 1.549944083 |
| 18250296 | QINWTVLYR                     |                    | ribosomal protein L24 [Mus musculus]                                                                | 1192.6492 | 50.05  | 1.448618996 |
| 31982526 | QIQEITGNTEALSGR               |                    | parvin, alpha [Mus musculus]                                                                        | 1745.8773 | 86.38  | 0           |
| 37620153 | QISEGVEYIHK                   |                    | myosin, light polypeptide kinase telokin isoform [Mus musculus]                                     | 1302.6678 | 42.57  | 0           |
| 1346343  | QISNLQQSISDAEQR               |                    | Keratin, type II cytoskeletal 1 (Cytokeratin 1) (K1) (CK 1) (67 kDa cytoke                          | 1716.8484 | 84.3   | 0           |
| 6754976  | QITINDLPVGR                   |                    | peroxiredoxin 1 [Mus musculus]                                                                      | 1225.6946 | 50.08  | 1.266707203 |
| 31560539 | QITVNDLPVGR                   |                    | peroxiredoxin 2 [Mus musculus]                                                                      | 1211.673  | 27.72  | 1.78781787  |
| 6679291  | QIVWNGPVGVFWEAFAR             |                    | phosphoglycerate kinase 1 [Mus musculus]                                                            | 2105.0657 | 57.91  | 1.527380923 |
| 21704156 | QKEFDPTITDGSLSGSPSR           |                    | caldesmon 1 [Mus musculus]                                                                          | 1934.9492 | 82.51  | 0.327773805 |
| 6755354  | QLDSGLLLVTGPLVINR             |                    | ribosomal protein L6 [Mus musculus]                                                                 | 1808.0715 | 82.15  | 1.431819194 |
| 11875203 | QLEEEQALQK                    |                    | tropomyosin 2, beta [Mus musculus]                                                                  | 1343.687  | 30.06  | 0           |
| 6755901  | QLFHPEQLITGK                  |                    | tubulin, alpha 1 [Mus musculus]                                                                     | 1410.7808 | 56.35  | 0           |
| 34740335 | QLFHPEQLITGK                  |                    | tubulin, alpha 2 [Mus musculus]                                                                     | 1410.7808 | 56.35  | 0           |
| 6678467  | QLFHPEQLITGK                  |                    | tubulin, alpha 4 [Mus musculus]                                                                     | 1410.7808 | 56.35  | 0           |
| 6678469  | QLFHPEQLITGK                  |                    | tubulin, alpha 6 [Mus musculus]                                                                     | 1410.7808 | 56.35  | 0           |
| 7305295  | QLHEYETELEDER                 |                    | myosin, heavy polypeptide 11, smooth muscle [Mus musculus]                                          | 1690.7643 | 77.93  | 0           |
| 7305295  | QLHEYETELEDER                 |                    | myosin, heavy polypeptide 11, smooth muscle [Mus musculus]                                          | 1818.856  | 69.28  | 0.176914114 |
| 6678571  | QLLTLSNELSOAR                 |                    | villin 2 [Mus musculus]                                                                             | 1472.7981 | 25.34  | 0.986892042 |
| 6679537  | QLPDVQLLAQQLLLR               |                    | prostaglandin-endoperoxide synthase 1 [Mus musculus]                                                | 1748.047  | 33.9   | 1.09963251  |
| 29336026 | QLPIYTEAIVEMYR                |                    | nonmuscle myosin heavy chain [Mus musculus]                                                         | 1725.8881 | 24.31  | 2.20381661  |

|          |                           |                    |                                                                                                     |           |        |             |
|----------|---------------------------|--------------------|-----------------------------------------------------------------------------------------------------|-----------|--------|-------------|
| 13384736 | QLQNISQAAAASGGAK          |                    | dynein, cytoplasmic, heavy chain 1 [Mus musculus]                                                   | 1443.7528 | 61.33  | 0           |
| 28490839 | QLSNDAAASVDLNPTESK        | Deamidation (NQ)   | PREDICTED: nuclear protein in the AT region [Mus musculus]                                          | 1789.8595 | 23.05  | 0           |
| 22122569 | QLSQNFLLDLR               | 3 Deamidation (NQ) | transcription factor B1, mitochondrial [Mus musculus]                                               | 1349.7113 | 28.13  | 0           |
| 56605979 | QLTEMLPSILNQLGADSLTSLR    |                    | basic transcription factor 3 [Mus musculus]                                                         | 2400.2773 | 25.23  | 1.461060802 |
| 7304993  | QLTQPETSYGR               |                    | drebrin-like [Mus musculus]                                                                         | 1279.6324 | 38.41  | 1.377234814 |
| 13385718 | QLVEQVEQIQK               |                    | transmembrane emp24 protein transport domain containing 9 [Mus musculus]                            | 1341.7325 | 36.44  | 2.41221246  |
| 6755714  | QMEQVAQFLK                |                    | transgelin [Mus musculus]                                                                           | 1221.6249 | 57.62  | 0           |
| 63746482 | QMQLENVSVALEFLDR          |                    | PREDICTED: filamin, alpha [Mus musculus]                                                            | 1891.959  | 104.16 | 0.213545122 |
| 50355692 | QNGDDPLMTYR               |                    | lamin A isoform A [Mus musculus]                                                                    | 1309.5878 | 28.87  | 1.847180757 |
| 51712333 | QNGVLNSWTDQDSK            |                    | PREDICTED: similar to anti-PRSV coat protein monoclonal antibody PRSV-L 3-8 immunoglobulin light ch | 1591.7484 | 47.9   | 0           |
| 63487095 | QPELPEVIAMLGFR            |                    | PREDICTED: catenin src [Mus musculus]                                                               | 1599.8524 | 46.06  | 1.699115809 |
| 30794450 | QPYAVSELAGHQTSAESWGTGR    |                    | ribosomal protein L4 [Mus musculus]                                                                 | 2332.1011 | 61.99  | 1.517049946 |
| 29789080 | QQALTVSTDPEHR             |                    | coatamer protein complex, subunit beta 2 (beta prime) [Mus musculus]                                | 1481.7386 | 38.19  | 1.350861444 |
| 63540743 | QQEGEASSQDMTAQVTSPSGK     |                    | PREDICTED: filamin C, gamma [Mus musculus]                                                          | 2165.9302 | 49.83  | 0           |
| 16716509 | QQEQLQLQLLQQHAGK          | 3 Deamidation (NQ) | forkhead box P1 [Mus musculus]                                                                      | 2021.0483 | 25.68  | 0           |
| 13507628 | QQEQTAQGTAPDAVDQQR        |                    | LPS-responsive beige-like anchor [Mus musculus]                                                     | 1970.9293 | 70.94  | 1.829394521 |
| 46559834 | QQLDELNWSOTALAEGER        |                    | desmuslin isoform M [Mus musculus]                                                                  | 1959.951  | 45.94  | 0           |
| 14861854 | QQLLETLQLDGGGR            |                    | keratin complex 2, basic, gene 7 [Mus musculus]                                                     | 1357.7142 | 21.39  | 2.212314392 |
| 6755763  | QQLSAEELDAQLDAYNAR        |                    | THO complex 4 [Mus musculus]                                                                        | 2034.983  | 36.4   | 2.015179959 |
| 7106421  | QQMLENQMEVR               |                    | spectrin beta 2 isoform 2 [Mus musculus]                                                            | 1405.6621 | 29.31  | 0           |
| 22550094 | QQPPDLVDFAVEYFTR          |                    | protein kinase, cAMP dependent regulatory, type II alpha [Mus musculus]                             | 1924.9435 | 65.57  | 1.347074483 |
| 21312968 | QQSEEDLLLQDFSR            |                    | signal sequence receptor, gamma [Mus musculus]                                                      | 1707.8276 | 55.04  | 1.672364974 |
| 21312968 | QQSEEDLLLQDFSR            | Deamidation (NQ)   | signal sequence receptor, gamma [Mus musculus]                                                      | 1708.8119 | 22.54  | 3.516980655 |
| 63476037 | QQSLETAMSFVAR             |                    | PREDICTED: procollagen, type VI, alpha 3 [Mus musculus]                                             | 1467.7235 | 34.14  | 0           |
| 7305295  | QRYEILAAANAIPK            |                    | myosin, heavy polypeptide 11, smooth muscle [Mus musculus]                                          | 1486.8407 | 30.72  | 0.259291238 |
| 41322904 | QSAEEQAQAQAQAAAEK         |                    | plectin 1 isoform 1 [Mus musculus]                                                                  | 1957.9312 | 85.82  | 1.644634783 |
| 6754508  | QSFTMVADTPENLR            |                    | LIM and SH3 protein 1 [Mus musculus]                                                                | 1608.7694 | 37.07  | 1.044429005 |
| 21592285 | QSQTLQQQVTVNTEELK         |                    | keratin 20 [Mus musculus]                                                                           | 1974.0204 | 68.94  | 0           |
| 30794412 | QSSYGQSYNNQGGQNTSSGGQGGGR |                    | TAF15 RNA polymerase II, TATA box binding protein (TBP)-associated factor [Mus musculus]            | 2747.1577 | 140.64 | 1.591580595 |
| 41322904 | QTNLENLDAQFSAVER          |                    | plectin 1 isoform 1 [Mus musculus]                                                                  | 1834.9028 | 45.9   | 0.892494214 |
| 7305291  | QTPAAPETEEPEYR            |                    | metaxin 1 [Mus musculus]                                                                            | 1617.7419 | 24.55  | 0           |
| 31981690 | QTQTFTTYSYDNQPGVLIQVYEGER |                    | heat shock protein 8 [Mus musculus]                                                                 | 2774.3213 | 79.76  | 1.1473841   |
| 63704924 | QTQTFTTYSYDNQPGVLIQVYEGER |                    | PREDICTED: heat shock protein 1B [Mus musculus]                                                     | 2774.3213 | 79.76  | 1.1473841   |
| 6680606  | QTSAMSSFGGTGGGSVR         |                    | keratin complex 1, acidic, gene 19 [Mus musculus]                                                   | 1586.7484 | 114.79 | 1.192578965 |
| 8567336  | QTTPMTAQPPAPTFSLQIGQR     |                    | chloride channel calcium activated 3 [Mus musculus]                                                 | 2383.2312 | 19.21  | 2.395700006 |
| 22267442 | QVAEQFLNMR                |                    | ubiquinol cytochrome c reductase core protein 2 [Mus musculus]                                      | 1235.6217 | 24.27  | 1.059594075 |
| 6677935  | QVDENWYEGR                |                    | sorbin and SH3 domain containing 1 [Mus musculus]                                                   | 1295.5735 | 26.95  | 0           |
| 6680726  | QVELALWDTAGQEDYDR         |                    | ras homolog gene family, member B [Mus musculus]                                                    | 2008.9006 | 31.35  | 1.155737349 |
| 7305085  | QVLEELTELPVMVELASDFLDR    |                    | glutamine fructose-6-phosphate transaminase 1 [Mus musculus]                                        | 2546.3037 | 125.73 | 1.380290168 |
| 22122789 | QVLLSEPQEAALYR            |                    | acylpeptide hydrolase [Mus musculus]                                                                | 1687.9037 | 20.87  | 1.258727712 |
| 41322904 | QVQVALETQAR               |                    | plectin 1 isoform 1 [Mus musculus]                                                                  | 1242.6818 | 34.9   | 0.977689378 |
| 63680681 | QVSVGQVPGR                | 2 Deamidation (NQ) | PREDICTED: similar to Zinc finger protein 132 [Mus musculus]                                        | 1028.5178 | 19     | 0           |
| 63562723 | QVVNIPSFIVR               |                    | PREDICTED: similar to 40S ribosomal protein S9 [Mus musculus]                                       | 1271.7487 | 53.51  | 1.375970704 |
| 21313162 | QWLQEIDR                  |                    | RAB1B, member RAS oncogene family [Mus musculus]                                                    | 1087.5536 | 37.37  | 2.036148514 |
| 6679587  | QWLQEIDR                  |                    | RAB1, member RAS oncogene family [Mus musculus]                                                     | 1087.5536 | 37.37  | 2.036148514 |
| 6677813  | QWYESHYALPLGR             |                    | ribosomal protein S8 [Mus musculus]                                                                 | 1619.7866 | 25.44  | 1.497708684 |
| 21592285 | QWYETNAPSTIR              |                    | keratin 20 [Mus musculus]                                                                           | 1465.7106 | 51.25  | 0.770439999 |
| 6996913  | RAEDGSVIDYELIDQDAR        |                    | annexin A2 [Mus musculus]                                                                           | 2064.9895 | 50.98  | 1.137137611 |
| 31981690 | RFDDAVVQSDMK              |                    | heat shock protein 8 [Mus musculus]                                                                 | 1410.6707 | 59.79  | 1.681665582 |
| 63664182 | RFDDAVVQSDMK              |                    | PREDICTED: similar to heat shock protein 8 [Mus musculus]                                           | 1410.6707 | 59.79  | 1.681665582 |
| 33563250 | RIESLNEEIAFLK             |                    | desmin [Mus musculus]                                                                               | 1561.8616 | 62.01  | 0           |
| 63489754 | SADESGQALLAASHYASDEVK     |                    | PREDICTED: similar to Spectrin alpha chain, brain (Spectrin, non-erythroid alpha chain) (Alpha-II s | 2177.011  | 56.64  | 1.084955764 |
| 34328108 | SAGVSVPGMPGSPGR           |                    | procollagen, type I, alpha 1 [Mus musculus]                                                         | 1452.7323 | 56.42  | 0           |
| 6671666  | SALFAQINQGESITHALK        |                    | CAP, adenylate cyclase-associated protein 1 [Mus musculus]                                          | 1928.0226 | 28.11  | 1.890980405 |
| 63476037 | SALLDSIQNLQVALTSK         |                    | PREDICTED: procollagen, type VI, alpha 3 [Mus musculus]                                             | 1801.0044 | 85.42  | 0.096469615 |
| 6754206  | SANLVAATLGAILNR           |                    | hexokinase 1 [Mus musculus]                                                                         | 1483.8604 | 77.3   | 1.120202466 |
| 29293809 | SAYDSTMETMNYAQIR          |                    | ATP citrate lyase [Mus musculus]                                                                    | 1880.8241 | 67.12  | 2.614236203 |
| 136429   | SCAAAGTECLISGWNTK         |                    | Trypsin precursor                                                                                   | 1768.8038 | 128.14 | 0           |
| 54020676 | SDAAPTVPQPSAPR            |                    | hypothetical protein LOC229317 [Mus musculus]                                                       | 1393.7085 | 35.44  | 1.77131939  |
| 18079339 | SDFDPGGDTYQHPPK           |                    | aconitase 2, mitochondrial [Mus musculus]                                                           | 1731.7611 | 48.16  | 0.769357138 |



|          |                             |                    |                                                                                                     |           |        |             |
|----------|-----------------------------|--------------------|-----------------------------------------------------------------------------------------------------|-----------|--------|-------------|
| 31981722 | SDIDEIVLVGGSTR              |                    | heat shock 70kD protein 5 (glucose-regulated protein) [Mus musculus]                                | 1460.7618 | 55.79  | 0           |
| 6679567  | SDQVNGVVLVSLLDK             |                    | polymerase I and transcript release factor [Mus musculus]                                           | 1599.9021 | 92.65  | 3.532556968 |
| 63738313 | SEDGVEGDLGETQSR             |                    | PREDICTED: similar to AHNAK [Mus musculus]                                                          | 1578.705  | 29.43  | 1.248937487 |
| 6753498  | SEDYAFPTYADR                |                    | cytochrome c oxidase subunit IV isoform 1 [Mus musculus]                                            | 1434.6228 | 49.14  | 0.946182181 |
| 31982290 | SEGDTAYGQQVQPNWTK           |                    | LIM domain containing preferred translocation partner in lipoma [Mus musculus]                      | 1908.8838 | 72.93  | 0.673005658 |
| 6755817  | SELVANNVTLPAGEQR            |                    | thymopoietin [Mus musculus]                                                                         | 1697.8879 | 45.1   | 1.455233511 |
| 6755963  | SENGLEFTSSGSANTETTK         |                    | voltage-dependent anion channel 1 [Mus musculus]                                                    | 1959.8726 | 85.97  | 1.736105517 |
| 6679687  | SEPIPESNEGPKV               |                    | glucose regulated protein [Mus musculus]                                                            | 1382.6829 | 77.36  | 1.079889373 |
| 6755566  | SEQAEPPAAADTHEAGDQNEAEK     |                    | solute carrier family 9 (sodium/hydrogen exchanger), isoform 3 regulator 1 [Mus musculus]           | 2395.0393 | 101.65 | 0.742654289 |
| 13430890 | SETAAPAAPAPAEK              |                    | histone 1, H1e [Mus musculus]                                                                       | 1478.7516 | 63.66  | 0           |
| 34328365 | SETAAPAAPAPAVEK             |                    | histone 1, H1d [Mus musculus]                                                                       | 1506.783  | 46.57  | 2.207909846 |
| 7304889  | SETSGSFEDALLAIVK            |                    | annexin A4 [Mus musculus]                                                                           | 1666.844  | 41.72  | 0           |
| 29293809 | SFDELGEIIQSVYEDLVAK         |                    | ATP citrate lyase [Mus musculus]                                                                    | 2155.0928 | 92.67  | 3.16102367  |
| 21314832 | SFENSLGINVPR                |                    | UDP-glucose pyrophosphorylase 2 [Mus musculus]                                                      | 1332.6874 | 55.82  | 0.734519923 |
| 63704924 | SFFPEEISSMVLTK              |                    | PREDICTED: heat shock protein 1B [Mus musculus]                                                     | 1614.7982 | 51.78  | 0           |
| 51767507 | SFGGGTGSFGFTLLMER           |                    | PREDICTED: similar to tubulin, alpha-like 3 [Mus musculus]                                          | 1703.814  | 40.69  | 1.59623282  |
| 6754090  | SFLGGDPSMVDYLTWPWFQR        |                    | glutathione S-transferase omega 1 [Mus musculus]                                                    | 2489.168  | 25.41  | 1.696078086 |
| 51770896 | SFVQNYPVVSIEDPFDQDDWGAQWK   |                    | PREDICTED: similar to Alpha enolase (2-phospho-D-glycerate hydro-lyase) (Non-neural enolase) (NNE)  | 2970.3728 | 86.92  | 0.88614526  |
| 31981690 | SFYPEEVSSMVLTK              |                    | heat shock protein 8 [Mus musculus]                                                                 | 1616.7947 | 59.99  | 1.803836596 |
| 51873060 | SGDAIIVDMVPGKPMCVEFSFYDPLGR |                    | eukaryotic translation elongation factor 1 alpha 1 [Mus musculus]                                   | 2938.3899 | 51.65  | 1.190111826 |
| 7305027  | SGETEDTFIADLVVGLCTGQIK      |                    | enolase 2, gamma neuronal [Mus musculus]                                                            | 2296.1511 | 121.59 | 1.152423561 |
| 51770896 | SGETEDTFIADLVVGLCTGQIK      |                    | PREDICTED: similar to Alpha enolase (2-phospho-D-glycerate hydro-lyase) (Non-neural enolase) (NNE)  | 2296.1511 | 121.59 | 1.152423561 |
| 6679793  | SGIGTGDEPGPQGLNGEAGPEDPSR   |                    | protein phosphatase 1G (formerly 2C), magnesium-dependent, gamma isoform [Mus musculus]             | 2394.1116 | 32.03  | 1.102698379 |
| 6680970  | SGLGSQVGLMPGSGVGPVGR        | Oxidation (M)      | procollagen, type V, alpha 2 [Mus musculus]                                                         | 1867.9723 | 28.46  | 0           |
| 22165384 | SGPFGQIFRPDNFVFGQSGAGNNWAK  |                    | tubulin, beta, 2 [Mus musculus]                                                                     | 2798.3457 | 25.99  | 1.010408164 |
| 33859488 | SGPFGQIFRPDNFVFGQSGAGNNWAK  |                    | tubulin, beta 2 [Mus musculus]                                                                      | 2798.3457 | 25.99  | 1.010408164 |
| 31981939 | SGPFGQIFRPDNFVFGQSGAGNNWAK  |                    | tubulin, beta 4 [Mus musculus]                                                                      | 2798.3457 | 25.99  | 1.010408164 |
| 7106439  | SGPFGQIFRPDNFVFGQSGAGNNWAK  |                    | tubulin, beta 5 [Mus musculus]                                                                      | 2798.3457 | 25.99  | 1.010408164 |
| 40254244 | SGSMDSPMSTENNSQLR           |                    | loss of heterozygosity, 11, chromosomal region 2, gene A homolog [Mus musculus]                     | 1840.7836 | 20.9   | 1.542995857 |
| 6680836  | SGTIFDNFLITNDEAYAEFNETWGVTK |                    | calreticulin [Mus musculus]                                                                         | 3268.4995 | 82.92  | 0           |
| 9845263  | SGTTWLSEIVDMVLNDGNVEK       |                    | dopa/tyrosine sulfotransferase [Mus musculus]                                                       | 2307.0728 | 35.59  | 1.043332127 |
| 13937355 | SGYQQAASEHGLVVIAPDTSR       |                    | esterase D/formylglutathione hydrolase [Mus musculus]                                               | 2283.1279 | 38.52  | 0.991030514 |
| 41322904 | SIITYVSSLYDAMP              |                    | plectin 1 isoform 1 [Mus musculus]                                                                  | 1715.8695 | 26.73  | 2.428242219 |
| 6755863  | SILFVPTSAPR                 |                    | tumor rejection antigen gp96 [Mus musculus]                                                         | 1187.6796 | 30.24  | 0           |
| 31981690 | SINPDEAVAYGAAVQAAILSGDK     |                    | heat shock protein 8 [Mus musculus]                                                                 | 2260.1519 | 121.91 | 1.279678503 |
| 6754206  | SIPDGEHGDFLALDLGGTNFR       |                    | hexokinase 1 [Mus musculus]                                                                         | 2332.1318 | 53.22  | 0           |
| 13384736 | SIPLDEGEDEAQR               |                    | dynein, cytoplasmic, heavy chain 1 [Mus musculus]                                                   | 1458.6726 | 50.18  | 0           |
| 31982030 | SIQEIQELDKDDESLR            |                    | Rho GDP dissociation inhibitor (GDI) alpha [Mus musculus]                                           | 1917.9436 | 71.3   | 1.197488781 |
| 34740335 | SIQFVDWCPTGFK               |                    | tubulin, alpha 2 [Mus musculus]                                                                     | 1527.7356 | 64.35  | 1.350915685 |
| 6678467  | SIQFVDWCPTGFK               |                    | tubulin, alpha 4 [Mus musculus]                                                                     | 1527.7356 | 64.35  | 1.350915685 |
| 38090003 | SISTSLPVLDLIDAIAPNAVR       |                    | PREDICTED: expressed sequence A1427122 [Mus musculus]                                               | 2165.2185 | 66.58  | 1.039011204 |
| 31981657 | SIVNNGHSFNVEFDDSQDNAVLK     |                    | carbonic anhydrase 2 [Mus musculus]                                                                 | 2549.166  | 60.07  | 0.966575542 |
| 6679439  | SIYGEKFEDENFILK             |                    | peptidylprolyl isomerase A [Mus musculus]                                                           | 1831.905  | 24.84  | 1.519504276 |
| 6678674  | SLADELALVDVLEDK             |                    | lactate dehydrogenase 2, B chain [Mus musculus]                                                     | 1629.8513 | 58.08  | 0           |
| 64427157 | SLASVPQQNGFSGVSETAGAQR      |                    | PREDICTED: synaptodin 2 [Mus musculus]                                                              | 2191.0767 | 51.08  | 0           |
| 64427157 | SLASVPQQNGFSGVSETAGAQR      | Deamidation (NQ)   | PREDICTED: synaptodin 2 [Mus musculus]                                                              | 2192.0623 | 47     | 0.418618034 |
| 63476037 | SLDEVSQPAQELK               |                    | PREDICTED: procollagen, type VI, alpha 3 [Mus musculus]                                             | 1443.7408 | 22.92  | 0           |
| 63476037 | SLDEVSQPAQELKR              |                    | PREDICTED: procollagen, type VI, alpha 3 [Mus musculus]                                             | 1599.8346 | 40.44  | 0           |
| 20911031 | SLDLDLSIAEVK                |                    | keratin complex 2, basic, gene 5 [Mus musculus]                                                     | 1302.6921 | 69.61  | 0           |
| 1346343  | SLDLDLSIAEVK                |                    | Keratin, type II cytoskeletal 1 (Cytokeratin 1) (K1) (CK 1) (67 kDa cytokeratin) (Hair alpha protei | 1302.6921 | 69.61  | 0           |
| 13624315 | SLDMDGIIAEVR                |                    | keratin complex 2, basic, gene 8 [Mus musculus]                                                     | 1318.6741 | 58.17  | 1.585758127 |
| 63565108 | SLDMDGIIAEVR                |                    | PREDICTED: similar to cytokeratin EndoA - mouse [Mus musculus]                                      | 1318.6741 | 58.17  | 1.585758127 |
| 7305295  | SLEADLMQLQEDLAAAER          |                    | myosin, heavy polypeptide 11, smooth muscle [Mus musculus]                                          | 2002.9976 | 107.64 | 0.191820883 |
| 7305295  | SLEADLMQLQEDLAAAER          | Oxidation (M)      | myosin, heavy polypeptide 11, smooth muscle [Mus musculus]                                          | 2018.9702 | 45.23  | 0.312509692 |
| 6754556  | SLETENSALQLQVTER            |                    | lamin B1 [Mus musculus]                                                                             | 1817.9269 | 30.97  | 0           |
| 29243996 | SLINFDKDNISDK               | 2 Deamidation (NQ) | 1-beta dynein [Mus musculus]                                                                        | 1510.7522 | 19.33  | 0           |
| 6680606  | SLLEGQEAHYNNLPTPK           |                    | keratin complex 1, acidic, gene 19 [Mus musculus]                                                   | 1910.9691 | 68.37  | 1.507709999 |
| 6680606  | SLLEGQEAHYNNLPTPK           | Deamidation (NQ)   | keratin complex 1, acidic, gene 19 [Mus musculus]                                                   | 1911.9528 | 41.92  | 1.696048657 |
| 12963539 | SLLPGCQSVISR                |                    | ETHE1 protein [Mus musculus]                                                                        | 1259.6793 | 23.22  | 0.832818889 |
| 47086911 | SLNNQFASFIDK                |                    | keratin Kb40 [Mus musculus]                                                                         | 1383.6888 | 73.68  | 0           |

|          |                             |                  |                                                                                                     |           |        |             |
|----------|-----------------------------|------------------|-----------------------------------------------------------------------------------------------------|-----------|--------|-------------|
| 1346343  | SLNNQFASFIDK                |                  | Keratin, type II cytoskeletal 1 (Cytokeratin 1) (K1) (CK 1) (67 kDa cytokeratin) (Hair alpha protei | 1383.6888 | 73.68  | 0           |
| 6754524  | SLNPELGTADADKEQWK           |                  | lactate dehydrogenase 1, A chain [Mus musculus]                                                     | 1830.8921 | 69.13  | 2.042114786 |
| 63664186 | SLNPELGTADADKEQWK           |                  | PREDICTED: similar to L-lactate dehydrogenase A chain (LDH-A) (LDH muscle subunit) (LDH-M) [Mus mus | 1830.8921 | 69.13  | 2.042114786 |
| 33859811 | SLNSEMDNLANLR               |                  | hydroxyacyl-Coenzyme A dehydrogenase/3-ketoacyl-Coenzyme A thiolase/enoyl-Coenzyme A hydratase (tri | 1589.7983 | 75.4   | 0.767748499 |
| 21313080 | SLNYWSNLLGMK                |                  | hypothetical protein LOC67201 [Mus musculus]                                                        | 1425.7139 | 21.98  | 0           |
| 31980648 | SLQDIIAILGMDLSEEDKLTVSR     |                  | ATP synthase, H <sup>+</sup> transporting mitochondrial F1 complex, beta subunit [Mus musculus]     | 2675.3862 | 38.26  | 1.226146229 |
| 6680572  | SLSALGNVISALAEGSTYYPYR      |                  | kinesin family member 5B [Mus musculus]                                                             | 2268.1802 | 52.92  | 1.43429373  |
| 21592285 | SLSSSSQGPALSMGSLYR          |                  | keratin 20 [Mus musculus]                                                                           | 1914.9307 | 45.85  | 0.637214255 |
| 40556608 | SLTNDWEDHLAVK               |                  | heat shock protein 1, beta [Mus musculus]                                                           | 1527.7435 | 37.01  | 1.361468797 |
| 31982755 | SLYSSSPGGAYVTR              |                  | vimentin [Mus musculus]                                                                             | 1444.7144 | 53.24  | 0.704169397 |
| 22267442 | SMAASGNLGHTPFLDEL           |                  | ubiquinol cytochrome c reductase core protein 2 [Mus musculus]                                      | 1759.8466 | 20.35  | 0           |
| 20137006 | SMEAEMIQLQEELAAAER          |                  | myosin, heavy polypeptide 9, non-muscle [Mus musculus]                                              | 2048.9697 | 51.26  | 2.202467987 |
| 22122825 | SMLEVNYPMENGVIR             |                  | actin-related protein 2 [Mus musculus]                                                              | 1751.8682 | 26.16  | 1.474143164 |
| 50355692 | SNEDQSMGNWQIR               |                  | lamin A isoform A [Mus musculus]                                                                    | 1564.6915 | 52.81  | 1.045640313 |
| 31543051 | SNEILTAIQGMR                |                  | karyopherin (importin) beta 1 [Mus musculus]                                                        | 1445.7833 | 21.78  | 7.574023263 |
| 6754854  | SNGAYNIFANDR                |                  | nidogen 1 [Mus musculus]                                                                            | 1341.6257 | 22.47  | 3.234219538 |
| 33469063 | SNLVGMGVIPLEYLPGETADSLGLTGR |                  | aconitase 1 [Mus musculus]                                                                          | 2759.4309 | 56.66  | 1.380378878 |
| 13624315 | SNMDNMFESYINNL              |                  | keratin complex 2, basic, gene 8 [Mus musculus]                                                     | 1847.8258 | 57.59  | 1.490567299 |
| 63565108 | SNMDNMFESYINNL              |                  | PREDICTED: similar to cytokeratin EndoA - mouse [Mus musculus]                                      | 1847.8258 | 57.59  | 1.490567299 |
| 21450277 | SPDFTNENPLETR               |                  | Na <sup>+</sup> /K <sup>+</sup> -ATPase alpha 1 subunit [Mus musculus]                              | 1519.7112 | 80.59  | 0.981682571 |
| 6679761  | SPFETDMLTLTR                |                  | fructose biphosphatase 2 [Mus musculus]                                                             | 1410.7003 | 34.77  | 1.254268524 |
| 63746482 | SPFEVYVDK                   |                  | PREDICTED: filamin, alpha [Mus musculus]                                                            | 1083.5333 | 57.6   | 0.391459575 |
| 31980969 | SPFLQVFNNSPDESSYYR          |                  | SEC23B [Mus musculus]                                                                               | 2149.9937 | 39.57  | 0.666953669 |
| 63746482 | SPFSVGVSPSLDLSK             |                  | PREDICTED: filamin, alpha [Mus musculus]                                                            | 1519.8031 | 99.47  | 0           |
| 7305505  | SPLSAEELTAIEDGVLDK          |                  | smoothelin [Mus musculus]                                                                           | 2016.0089 | 78.26  | 0.53645309  |
| 37620153 | SPSENGGNSAEVLNVK            | Deamidation (NQ) | myosin, light polypeptide kinase telokin isoform [Mus musculus]                                     | 1602.7739 | 23.82  | 0           |
| 25030960 | SPYAPANER                   | Deamidation (NQ) | PREDICTED: similar to MORF-related gene X [Mus musculus]                                            | 1005.4724 | 19.01  | 0           |
| 33859560 | SPYLYPLYGLGELPQGFAR         |                  | guanosine diphosphate (GDP) dissociation inhibitor 1 [Mus musculus]                                 | 2141.106  | 53.52  | 1.03720766  |
| 56119103 | SPYLYPLYGLGELPQGFAR         |                  | guanosine diphosphate (GDP) dissociation inhibitor 3 [Mus musculus]                                 | 2141.106  | 53.52  | 1.03720766  |
| 6678571  | SQEQLAAELAEYTA              |                  | villin 2 [Mus musculus]                                                                             | 1651.819  | 33.17  | 1.505278087 |
| 18079339 | SQFTITPGSEQIR               |                  | aconitase 2, mitochondrial [Mus musculus]                                                           | 1463.759  | 50.12  | 1.013850585 |
| 31981722 | SQIFSTASDNQPTVTIK           |                  | heat shock 70kD protein 5 (glucose-regulated protein) [Mus musculus]                                | 1836.9492 | 69.76  | 0.80405472  |
| 31981690 | SQIHDIIVLGGSTR              |                  | heat shock protein 8 [Mus musculus]                                                                 | 1481.813  | 65.1   | 0.997061366 |
| 41322904 | SQVEEELFSVR                 |                  | plectin 1 isoform 1 [Mus musculus]                                                                  | 1322.6597 | 24.02  | 0           |
| 547749   | SQYEQLAEQNR                 |                  | Keratin, type I cytoskeletal 10 (Cytokeratin 10) (K10) (CK 10)                                      | 1365.6464 | 55.81  | 0           |
| 6680606  | SRLEQEIATYR                 |                  | keratin complex 1, acidic, gene 19 [Mus musculus]                                                   | 1365.72   | 39.1   | 1.331946232 |
| 417200   | SRLEQEIATYR                 |                  | Keratin, type I cytoskeletal 19 (Cytokeratin 19) (K19) (CK 19)                                      | 1365.72   | 39.1   | 1.331946232 |
| 33859650 | SSELAALLSVFLER              |                  | membrane bound C2 domain containing protein [Mus musculus]                                          | 1605.8766 | 31.07  | 1.395155893 |
| 6755040  | SSFFVNLTLGGQK               |                  | profilin 1 [Mus musculus]                                                                           | 1454.7587 | 89.6   | 1.319659649 |
| 31559916 | SSGSPYGGYGGSGGGSGYGSR       |                  | heterogeneous nuclear ribonucleoprotein A3 isoform b [Mus musculus]                                 | 1910.8035 | 159.69 | 1.64137153  |
| 136429   | SSGSSYPSLLQCLK              |                  | Trypsin precursor                                                                                   | 1469.7283 | 64.94  | 0           |
| 12083691 | SSGTGASVGPQPSDQDTLVQR       |                  | PDZ and LIM domain 5 isoform ENH1 [Mus musculus]                                                    | 2184.0562 | 44.33  | 1.410667565 |
| 6755354  | SSITPGTVLILTGR              |                  | ribosomal protein L6 [Mus musculus]                                                                 | 1527.9176 | 42.79  | 1.711048206 |
| 22779912 | SLLDDLLTESEDMAQR            |                  | dynamitin 1-like [Mus musculus]                                                                     | 1922.9258 | 32.6   | 1.17194107  |
| 46195798 | SSLNPILFR                   |                  | dolichyl-di-phosphooligosaccharide-protein glycotransferase [Mus musculus]                          | 1046.5968 | 37.16  | 1.610955375 |
| 8567338  | SSPEPVALTESEYVIR            |                  | coatamer protein complex, subunit gamma [Mus musculus]                                              | 2006.991  | 49.51  | 1.024875044 |
| 31981690 | STAGDTHLGGEDFDNR            |                  | heat shock protein 8 [Mus musculus]                                                                 | 1691.7413 | 123.26 | 1.214241848 |
| 33859482 | STAISLFYELSENDLNFIK         |                  | eukaryotic translation elongation factor 2 [Mus musculus]                                           | 2204.1011 | 105.05 | 0.987468013 |
| 46559834 | STETMIGEMINLGLK             |                  | desmuslin isoform M [Mus musculus]                                                                  | 1636.826  | 78.31  | 0           |
| 33469093 | STGGGLMEEMNAMLAR            |                  | vasodilator-stimulated phosphoprotein [Mus musculus]                                                | 1667.772  | 34.95  | 0.977069815 |
| 6754816  | STLINSFLTDLYPER             |                  | septin 2 [Mus musculus]                                                                             | 1881.9941 | 47.85  | 0.884200386 |
| 31981549 | STLSVIPSGVQWQDR             |                  | sulfide quinone reductase-like [Mus musculus]                                                       | 1785.9502 | 41.81  | 1.227260628 |
| 6754256  | STNGDTFLGGEDFDQALLR         |                  | heat shock protein 9A [Mus musculus]                                                                | 2055.9668 | 106.68 | 1.340889593 |
| 6754256  | STNGDTFLGGEDFDQALLR         | Deamidation (NQ) | heat shock protein 9A [Mus musculus]                                                                | 2056.9683 | 72.2   | 0           |
| 51491845 | SVDPTLALSVYLR               |                  | clathrin, heavy polypeptide (Hc) [Mus musculus]                                                     | 1433.806  | 41.76  | 0           |
| 6678573  | SVEDLPEGVDPSPR              |                  | villin 1 [Mus musculus]                                                                             | 1399.642  | 31.64  | 0.697149309 |
| 50355692 | SVGGSGGGSGFDNLVTR           |                  | lamin A isoform A [Mus musculus]                                                                    | 1566.752  | 25.86  | 0           |
| 19745150 | SVGMIAGGTGITPMLQVIR         |                  | diaphorase 1 [Mus musculus]                                                                         | 1901.0287 | 29.21  | 1.570740949 |
| 7305085  | SVHFGQAVGTR                 |                  | glutamine fructose-6-phosphate transaminase 1 [Mus musculus]                                        | 1255.6567 | 21.62  | 0           |
| 51491845 | SVNESLNNLFITEEDYQALR        |                  | clathrin, heavy polypeptide (Hc) [Mus musculus]                                                     | 2355.1484 | 61.09  | 1.199619053 |

|          |                         |                                                                                                      |           |        |             |
|----------|-------------------------|------------------------------------------------------------------------------------------------------|-----------|--------|-------------|
| 6753658  | SVSTPSEAGSQSDGDAVGSR    | dynein, cytoplasmic, intermediate chain 2 [Mus musculus]                                             | 1950.8593 | 128.13 | 1.181487086 |
| 6756041  | SVTEQGAELSNEER          | tyrosine 3-monooxygenase/tryptophan 5-monooxygenase activation protein, zeta polypeptide [Mus muscu] | 1548.7256 | 84.87  | 1.432691273 |
| 33563270 | SWDIFFR                 | oxoglutarate dehydrogenase (lipoamide) [Mus musculus]                                                | 970.4785  | 28.11  | 0.797000892 |
| 6753138  | SYEAYVLNIIR             | Na+/K+ -ATPase beta 1 subunit [Mus musculus]                                                         | 1340.7288 | 45     | 1.261298974 |
| 6671507  | SYELPDGQVITIGNER        | actin, alpha 2, smooth muscle, aorta [Mus musculus]                                                  | 1790.9003 | 60.74  | 0.516066211 |
| 6671509  | SYELPDGQVITIGNER        | actin, beta, cytoplasmic [Mus musculus]                                                              | 1790.9003 | 60.74  | 0.516066211 |
| 30425250 | SYELPDGQVITIGNER        | hypothetical protein LOC238880 [Mus musculus]                                                        | 1790.9003 | 60.74  | 0.516066211 |
| 63694749 | SYELPDGQVITIGNER        | PREDICTED: similar to cytoplasmic beta-actin [Mus musculus]                                          | 1790.9003 | 60.74  | 0.516066211 |
| 63652452 | SYKLPDGQVITIGNER        | PREDICTED: similar to cytoplasmic beta-actin [Mus musculus]                                          | 1789.9653 | 64.39  | 0           |
| 38090710 | SYLTPVRDEESESQR         | PREDICTED: protein phosphatase 1, regulatory (inhibitor) subunit 12A [Mus musculus]                  | 1795.85   | 47.26  | 0           |
| 6753620  | TAAFLPLSQIYADGPGALR     | DEAD/H (Asp-Glu-Ala-Asp/His) box polypeptide 3, X-linked [Mus musculus]                              | 2316.2476 | 27.76  | 1.251178186 |
| 6756041  | TAFDEAIAELDTLSEESYK     | tyrosine 3-monooxygenase/tryptophan 5-monooxygenase activation protein, zeta polypeptide [Mus muscu] | 2131.9922 | 82.61  | 1.732299092 |
| 6806903  | TASEMVLADDNFSTIVAAVEEGR | ATPase, Ca++ transporting, cardiac muscle, slow twitch 2 [Mus musculus]                              | 2425.1548 | 64.95  | 0.973928493 |
| 36031132 | TASEMVLADDNFSTIVAAVEEGR | ATPase, Ca++ transporting, fast twitch 1 [Mus musculus]                                              | 2425.1548 | 64.95  | 0.973928493 |
| 63489754 | TATDEAYKDPNSLQKQ        | PREDICTED: similar to Spectrin alpha chain, brain (Spectrin, non-erythroid alpha chain) (Alpha-II s  | 1737.8376 | 30.85  | 0.865826577 |
| 6671664  | TDAPQPDVDEEGKEEEK       | calnexin [Mus musculus]                                                                              | 2043.941  | 55.33  | 2.00718067  |
| 6754034  | TDESQPWVLPVVR           | glutamate oxaloacetate transaminase 1, soluble [Mus musculus]                                        | 1525.8086 | 31.7   | 2.428578369 |
| 6677805  | TDITYPAGFMDVISIDK       | ribosomal protein S4, X-linked [Mus musculus]                                                        | 1885.9303 | 86.81  | 1.957171984 |
| 6680606  | TDLEMQIESLKEELAYLK      | keratin complex 1, acidic, gene 19 [Mus musculus]                                                    | 2153.1201 | 91.62  | 1.715662809 |
| 10946574 | TDLNPDLQGGDDLDPNYVLSR   | creatine kinase, brain [Mus musculus]                                                                | 2518.1736 | 96.22  | 0           |
| 63476037 | TDLQITINDPR             | PREDICTED: procollagen, type VI, alpha 3 [Mus musculus]                                              | 1273.6394 | 47.87  | 0           |
| 6755714  | TDMFQTVLDYEGK           | transgelin [Mus musculus]                                                                            | 1546.7209 | 53.12  | 0           |
| 63540743 | TDYVTDNGDGTYSR          | PREDICTED: filamin C, gamma [Mus musculus]                                                           | 1577.673  | 25.06  | 0           |
| 31982030 | TDYMGVSYGPR             | Rho GDP dissociation inhibitor (GDI) alpha [Mus musculus]                                            | 1245.5677 | 26.92  | 1.305283193 |
| 13384620 | TDYNASVSPVDSGSPER       | heterogeneous nuclear ribonucleoprotein K [Mus musculus]                                             | 1780.8077 | 103.08 | 1.533965217 |
| 63540743 | TEAAEIVEGEDSAYSVR       | PREDICTED: filamin C, gamma [Mus musculus]                                                           | 1825.8524 | 53.49  | 0           |
| 6753138  | TEISFRPNPK              | Na+/K+ -ATPase beta 1 subunit [Mus musculus]                                                         | 1303.6693 | 21.4   | 1.735916574 |
| 6679931  | TELDVVGGSVQGNTRYQFR     | UDP-N-acetyl-alpha-D-galactosamine: (N-acetylneuraminy)-galactosyl-N-acetylglucosaminylpolypeptid    | 1969.9666 | 41.98  | 0           |
| 7305295  | TELEDTLDSTATQQLR        | myosin, heavy polypeptide 11, smooth muscle [Mus musculus]                                           | 1949.9316 | 138.74 | 0.20648068  |
| 13624315 | TEMENEFVLK              | keratin complex 2, basic, gene 8 [Mus musculus]                                                      | 1352.6632 | 50.4   | 1.000928202 |
| 63565108 | TEMENEFVLK              | PREDICTED: similar to cytokeratin EndoA - mouse [Mus musculus]                                       | 1352.6632 | 50.4   | 1.000928202 |
| 31981722 | TFAPEEISAMVLTG          | heat shock 70kD protein 5 (glucose-regulated protein) [Mus musculus]                                 | 1536.7981 | 59.29  | 1.666305678 |
| 31791057 | TFGEVTDLDNEVNGMLR       | laminin, gamma 1 [Mus musculus]                                                                      | 1909.9084 | 70.52  | 0           |
| 33563250 | TFGGAPGFLSGLSPLSSPVFPR  | desmin [Mus musculus]                                                                                | 2078.072  | 125.93 | 0.261868618 |
| 6679078  | TFIAIKPDGVQR            | nucleoside-diphosphate kinase 2 [Mus musculus]                                                       | 1344.7692 | 22.82  | 0           |
| 21312260 | TFPTVNPPTTGEVIGHVAEGDR  | aldehyde dehydrogenase 1 family, member B1 [Mus musculus]                                            | 2197.094  | 63.27  | 1.148143428 |
| 63746482 | TFSVWYVPEVTGTHK         | PREDICTED: filamin, alpha [Mus musculus]                                                             | 1750.8844 | 86.79  | 0           |
| 6680067  | TFTTQETITNAETAK         | glucose phosphate isomerase 1 [Mus musculus]                                                         | 1655.8169 | 31.66  | 1.380662606 |
| 6753036  | TFVQENVYDEFVER          | aldehyde dehydrogenase 2, mitochondrial [Mus musculus]                                               | 1774.832  | 94.84  | 2.328899481 |
| 6755040  | TFVSITPAEVMVLVKG        | profilin 1 [Mus musculus]                                                                            | 1616.9321 | 90.05  | 1.366713558 |
| 6680748  | TGAIVDVPVGEELLGR        | ATP synthase, H+ transporting, mitochondrial F1 complex, alpha subunit, isoform 1 [Mus musculus]     | 1624.8964 | 84.01  | 1.049454298 |
| 6755965  | TGDFQLHTNVNNGTEFGGSIYQK | voltage-dependent anion channel 2 [Mus musculus]                                                     | 2527.1885 | 103.2  | 1.282978677 |
| 58037267 | TGEAIVDAALSALR          | protein disulfide isomerase-associated 6 [Mus musculus]                                              | 1386.7628 | 88.32  | 1.203077727 |
| 6755004  | TGGLEIDSDFGGFR          | programmed cell death 8 [Mus musculus]                                                               | 1470.6855 | 52.49  | 0.755266298 |
| 64427157 | TGGMAGGGPDPALQTDGLR     | PREDICTED: synaptodin 2 [Mus musculus]                                                               | 1673.7933 | 29.44  | 0           |
| 6681095  | TGQAAGFSYTDANK          | cytochrome c, somatic [Mus musculus]                                                                 | 1430.6545 | 68.63  | 0.490158208 |
| 6680748  | TGTAEMSSILEER           | ATP synthase, H+ transporting, mitochondrial F1 complex, alpha subunit, isoform 1 [Mus musculus]     | 1423.6787 | 42.86  | 1.005916486 |
| 31560517 | TGVAPIIDVVR             | ribosomal protein L27a [Mus musculus]                                                                | 1139.6772 | 33.56  | 1.125821439 |
| 63746482 | TGVAVNKPAAEFTVDAK       | PREDICTED: filamin, alpha [Mus musculus]                                                             | 1646.8795 | 84.88  | 0           |
| 7305295  | TGVLAHLEER              | myosin, heavy polypeptide 11, smooth muscle [Mus musculus]                                           | 1253.6501 | 63.99  | 0           |
| 6754576  | TGVPSQTPNPYANQR         | lymphocyte antigen 64 [Mus musculus]                                                                 | 1629.803  | 38.76  | 1.689328533 |
| 29293809 | TIAlIAEGIPEALTR         | ATP citrate lyase [Mus musculus]                                                                     | 1567.9034 | 47.91  | 2.434323262 |
| 31980648 | TIAMDGTEGLVR            | ATP synthase, H+ transporting mitochondrial F1 complex, beta subunit [Mus musculus]                  | 1262.6459 | 52.28  | 0.95349535  |
| 6754976  | TIAQDYGVLK              | peroxiredoxin 1 [Mus musculus]                                                                       | 1107.5884 | 27.32  | 0           |
| 33859811 | TIEYLEEVAVNFAK          | hydroxyacyl-Coenzyme A dehydrogenase/3-ketoacyl-Coenzyme A thiolase/enoyl-Coenzyme A hydratase (tri  | 1625.8398 | 48.82  | 0           |
| 6754854  | TIFWTDSQLDR             | nidogen 1 [Mus musculus]                                                                             | 1381.6774 | 34.48  | 0           |
| 6755901  | TIGGGDDSFNTFFSETGAGK    | tubulin, alpha 1 [Mus musculus]                                                                      | 2007.8975 | 131.26 | 1.236712847 |
| 34740335 | TIGGGDDSFNTFFSETGAGK    | tubulin, alpha 2 [Mus musculus]                                                                      | 2007.8975 | 131.26 | 1.236712847 |
| 6678469  | TIGGGDDSFNTFFSETGAGK    | tubulin, alpha 6 [Mus musculus]                                                                      | 2007.8975 | 131.26 | 1.236712847 |
| 31981909 | TIGVSNFNPLQIER          | aldo-keto reductase family 1, member B3 (aldose reductase) [Mus musculus]                            | 1587.8378 | 22.63  | 1.754369966 |

|          |                                 |                    |                                                                                                  |           |        |             |
|----------|---------------------------------|--------------------|--------------------------------------------------------------------------------------------------|-----------|--------|-------------|
| 6754816  | TIISYIDEQFER                    |                    | septin 2 [Mus musculus]                                                                          | 1513.7579 | 21.66  | 0.938235145 |
| 31543605 | TILPAAAQDVYYR                   |                    | ribophorin I [Mus musculus]                                                                      | 1480.7882 | 37.03  | 1.191219049 |
| 11230802 | TINEVENQILTR                    |                    | actinin alpha 4 [Mus musculus]                                                                   | 1429.7736 | 60.07  | 0.567234083 |
| 6753036  | TIPIDGDFSYTR                    |                    | aldehyde dehydrogenase 2, mitochondrial [Mus musculus]                                           | 1531.7484 | 62.75  | 2.787883978 |
| 59709449 | TIPWLENR                        |                    | actinin alpha 2 [Mus musculus]                                                                   | 1028.542  | 31.23  | 0.5135482   |
| 6755901  | TIQFVDWCPTGFK                   |                    | tubulin, alpha 1 [Mus musculus]                                                                  | 1541.7451 | 50.25  | 0.898859997 |
| 6678469  | TIQFVDWCPTGFK                   |                    | tubulin, alpha 6 [Mus musculus]                                                                  | 1541.7451 | 50.25  | 0.898859997 |
| 9845265  | TITLEVEPSDTIENVK                |                    | ubiquitin A-52 residue ribosomal protein fusion product 1 [Mus musculus]                         | 1787.9337 | 67.74  | 0           |
| 6680067  | TLASLSPETSLFIASK                |                    | glucose phosphate isomerase 1 [Mus musculus]                                                     | 1777.9957 | 59.16  | 0           |
| 31981828 | TLDLPIYVTR                      |                    | coatamer protein complex subunit alpha [Mus musculus]                                            | 1190.6744 | 31.98  | 1.166761192 |
| 51092303 | TLDNDIMLIKLSPPVTLNAR            | Oxidation (M)      | Try10-like trypsinogen [Mus musculus]                                                            | 2230.2151 | 27.09  | 0           |
| 7305295  | TLLQEQLQAETELAESEEMR            |                    | myosin, heavy polypeptide 11, smooth muscle [Mus musculus]                                       | 2511.2014 | 27.79  | 0           |
| 54607098 | TLNEADCATVPPAIR                 |                    | succinate dehydrogenase Fp subunit [Mus musculus]                                                | 1570.7845 | 19.12  | 1.176375526 |
| 31981657 | TLNFNEEGDAEEMVDNWRPAQPLK        |                    | carbonic anhydrase 2 [Mus musculus]                                                              | 2874.332  | 43     | 1.137724323 |
| 6680606  | TLQGLEIELQSQLSMK                |                    | keratin complex 1, acidic, gene 19 [Mus musculus]                                                | 1817.9746 | 87.82  | 2.780438226 |
| 417200   | TLQGLEIELQSQLSMK                |                    | Keratin, type I cytoskeletal 19 (Cytokeratin 19) (K19) (CK 19)                                   | 1817.9746 | 87.82  | 2.780438226 |
| 6680606  | TLQGLEIELQSQLSMK                | 2 Deamidation (NQ) | keratin complex 1, acidic, gene 19 [Mus musculus]                                                | 1819.9652 | 34.36  | 0           |
| 417200   | TLQGLEIELQSQLSMK                | 2 Deamidation (NQ) | Keratin, type I cytoskeletal 19 (Cytokeratin 19) (K19) (CK 19)                                   | 1819.9652 | 34.36  | 0           |
| 6680606  | TLQGLEIELQSQLSMK                | Deamidation (NQ)   | keratin complex 1, acidic, gene 19 [Mus musculus]                                                | 1818.9692 | 23.8   | 0.77343618  |
| 417200   | TLQGLEIELQSQLSMK                | Deamidation (NQ)   | Keratin, type I cytoskeletal 19 (Cytokeratin 19) (K19) (CK 19)                                   | 1818.9692 | 23.8   | 0.77343618  |
| 6754482  | TLQTLIEDLDSMK                   | Deamidation (NQ)   | keratin complex 1, acidic, gene 18 [Mus musculus]                                                | 1507.7371 | 29.81  | 0           |
| 46195798 | TLVLLDNLNVR                     |                    | dolichyl-di-phosphooligosaccharide-protein glycotransferase [Mus musculus]                       | 1269.7529 | 22.54  | 1.739352649 |
| 29126205 | TNVSGGAIALGHPLGGSGSR            |                    | acetyl-Coenzyme A acyltransferase 2 (mitochondrial 3-oxoacyl-Coenzyme A thiolase) [Mus musculus] | 1807.9467 | 49.86  | 0.605439442 |
| 6969613  | TPAQYDASELK                     |                    | annexin A2 [Mus musculus]                                                                        | 1222.5895 | 54.54  | 0           |
| 51592084 | TPELTWER                        |                    | hypothetical protein LOC74340 [Mus musculus]                                                     | 1031.5138 | 20.95  | 0.679935156 |
| 6753364  | TPFLLVGTQIDLR                   |                    | cell division cycle 42 homolog [Mus musculus]                                                    | 1472.8507 | 37.3   | 1.747020129 |
| 9790061  | TPLFDQIIDMLR                    |                    | pyrroline-5-carboxylate synthetase [Mus musculus]                                                | 1461.7795 | 38.3   | 1.096805108 |
| 29336026 | TPNVGGPGGQVVEVTAR               |                    | nonmuscle myosin heavy chain [Mus musculus]                                                      | 1722.86   | 37.04  | 1.540024541 |
| 6677935  | TPVDYIDLPHYSSPSR                |                    | sorbin and SH3 domain containing 1 [Mus musculus]                                                | 1796.8705 | 40.59  | 0           |
| 19527174 | TPVEEVPAAIAPFQGR                |                    | splicing factor 3b, subunit 3 [Mus musculus]                                                     | 1681.8831 | 38.09  | 0           |
| 13385652 | TPVEPEVAIHR                     |                    | ribosomal protein S20 [Mus musculus]                                                             | 1247.677  | 52.74  | 1.265903446 |
| 18250284 | TPYTDVNIIVTIR                   |                    | isocitrate dehydrogenase 3 (NAD+) alpha [Mus musculus]                                           | 1391.7494 | 30.14  | 1.675989149 |
| 31980726 | TQAYPDQKPGTSGLR                 |                    | phosphoglucomutase 2 [Mus musculus]                                                              | 1618.8234 | 42.57  | 0.863783279 |
| 31981824 | TQDDIETILQLFR                   |                    | ankyrin repeat domain 25 [Mus musculus]                                                          | 1591.8248 | 57.57  | 0           |
| 6678752  | TQDDVDIADVAYFEK                 |                    | lymphocyte antigen 74 [Mus musculus]                                                             | 1891.8701 | 107.02 | 1.695903621 |
| 33598964 | TQLELEDELQATEDAK                |                    | myosin heavy chain 10, non-muscle [Mus musculus]                                                 | 1961.9283 | 119.01 | 0.259877692 |
| 20137006 | TQLELEDELQATEDAK                |                    | myosin, heavy polypeptide 9, non-muscle [Mus musculus]                                           | 1961.9283 | 119.01 | 0.259877692 |
| 31980636 | TQQTDIELQEQEQR                  |                    | mannosidase, beta A, lysosomal [Mus musculus]                                                    | 1730.8304 | 22.68  | 0           |
| 21704096 | TSDLIVLGLPWK                    |                    | TAR DNA binding protein isoform 1 [Mus musculus]                                                 | 1341.7716 | 37.56  | 1.736431393 |
| 33563270 | TSFDEMLPGTHFQR                  |                    | oxoglutarate dehydrogenase (lipoamide) [Mus musculus]                                            | 1665.7745 | 30.34  | 0           |
| 55742711 | TSFIQYLLEGEVPGSR                |                    | EH-domain containing 2 [Mus musculus]                                                            | 1866.9609 | 30.8   | 0.616438156 |
| 13430890 | TSGPPVSELITK                    |                    | histone 1, H1e [Mus musculus]                                                                    | 1228.6628 | 26.87  | 0           |
| 51491845 | TSIDAYDNFDNISLAQR               |                    | clathrin, heavy polypeptide (Hc) [Mus musculus]                                                  | 1942.9207 | 85.41  | 1.358810343 |
| 27501448 | TSIEDQDELSLLQVPLVAGTVNR         |                    | integrin beta 4 binding protein [Mus musculus]                                                   | 2584.3613 | 19.29  | 1.33897672  |
| 6678359  | TSRPENAIYSNNEDFQVGQAK           |                    | transketolase [Mus musculus]                                                                     | 2481.1973 | 42.72  | 1.075645925 |
| 21313262 | TSSAEMPTPLGSAVEAIR              |                    | inner membrane protein, mitochondrial [Mus musculus]                                             | 1929.9983 | 82.29  | 1.587152994 |
| 31982275 | TSTVDLPIESQLLWQLDR              |                    | heat shock protein 4 [Mus musculus]                                                              | 2114.1038 | 39.47  | 1.276242379 |
| 6753294  | TSVQTEDDQLIAGQSAR               |                    | catenin alpha 1 [Mus musculus]                                                                   | 1818.877  | 53.04  | 0.936436232 |
| 6679761  | TTEDEPSEKDALQPGR                |                    | fructose bisphosphatase 2 [Mus musculus]                                                         | 1772.8385 | 62.19  | 0           |
| 6671507  | TTGIVLDSGDGVTHNVPYIYEGYALPHAIMR |                    | actin, alpha 2, smooth muscle, aorta [Mus musculus]                                              | 3196.5869 | 82.67  | 0.132839482 |
| 6671509  | TTGIVMDSGDGVTHTVPIYEGYALPHAILR  |                    | actin, beta, cytoplasmic [Mus musculus]                                                          | 3183.613  | 36.47  | 0.914483216 |
| 30425250 | TTGIVMDSGDGVTHTVPIYEGYALPHAILR  |                    | hypothetical protein LOC238880 [Mus musculus]                                                    | 3183.613  | 36.47  | 0.914483216 |
| 63694749 | TTGIVMDSGDGVTHTVPIYEGYALPHAILR  |                    | PREDICTED: similar to cytoplasmic beta-actin [Mus musculus]                                      | 3183.613  | 36.47  | 0.914483216 |
| 6754556  | TTIPEEEEEEEPIGVAVEEER           |                    | lamin B1 [Mus musculus]                                                                          | 2672.1899 | 119.89 | 1.013276072 |
| 38076180 | TTPDVIVFVGFGR                   |                    | PREDICTED: similar to ribosomal protein S24 [Mus musculus]                                       | 1398.7417 | 45.21  | 1.580270821 |
| 7305163  | TTPSYVAFDTDER                   |                    | heat shock protein 1-like [Mus musculus]                                                         | 1487.7142 | 67.3   | 1.286193294 |
| 31981690 | TTPSYVAFDTDER                   |                    | heat shock protein 8 [Mus musculus]                                                              | 1487.7142 | 67.3   | 1.286193294 |
| 63704924 | TTPSYVAFDTDER                   |                    | PREDICTED: heat shock protein 1B [Mus musculus]                                                  | 1487.7142 | 67.3   | 1.286193294 |
| 28395018 | TTYTQGVVQNGDLEYQMSTTAR          |                    | junction plakoglobin [Mus musculus]                                                              | 2690.2385 | 27.7   | 1.965233324 |
| 18875380 | TVFDEAIR                        |                    | RAS-related C3 botulinum substrate 3 [Mus musculus]                                              | 950.4917  | 22.09  | 1.710304834 |

|          |                           |                                 |                                                                                                                                          |           |        |             |
|----------|---------------------------|---------------------------------|------------------------------------------------------------------------------------------------------------------------------------------|-----------|--------|-------------|
| 6753428  | TVGMVAGDEETYEVAELFDPVIQER |                                 | creatine kinase, mitochondrial 1, ubiquitous [Mus musculus]                                                                              | 2944.4019 | 47.01  | 3.285344481 |
| 33859811 | TVLGVPEVLLGILPGAGGTQR     |                                 | hydroxyacyl-Coenzyme A dehydrogenase/3-ketoacyl-Coenzyme A thiolase/enoyl-Coenzyme A hydratase (triglyceride transferase) [Mus musculus] | 2047.1947 | 19.45  | 0           |
| 21361209 | TVTAMDVVYALK              |                                 | germinal histone H4 [Mus musculus]                                                                                                       | 1310.6963 | 76.83  | 0.889812942 |
| 31981690 | TVTNAVVTVPAYFNDSQR        |                                 | heat shock protein 8 [Mus musculus]                                                                                                      | 1982.0059 | 84.98  | 1.155846139 |
| 6681069  | TVYFAEEVQCEGNSFHK         |                                 | cysteine and glycine-rich protein 1 [Mus musculus]                                                                                       | 1987.8947 | 33.33  | 0           |
| 31981722 | TWNDPSPVQQDIK             |                                 | heat shock 70kD protein 5 (glucose-regulated protein) [Mus musculus]                                                                     | 1430.7036 | 52.86  | 0.921530869 |
| 31981722 | TWNDPSPVQQDIK             | Deamidation (NQ)                | heat shock 70kD protein 5 (glucose-regulated protein) [Mus musculus]                                                                     | 1431.7024 | 37.33  | 0           |
| 47059123 | TYAVSHTQEDLNR             |                                 | UDP glucuronosyltransferase 1 family, polypeptide A10 [Mus musculus]                                                                     | 1533.7328 | 46.19  | 2.211312679 |
| 29789080 | TYLPSQVSR                 |                                 | coatamer protein complex, subunit beta 2 (beta prime) [Mus musculus]                                                                     | 1050.5598 | 21.59  | 0.998424907 |
| 23346461 | TYLQALPYFDR               |                                 | NADH dehydrogenase (ubiquinone) Fe-S protein 2 [Mus musculus]                                                                            | 1386.7096 | 21.53  | 1.046381077 |
| 31982755 | TYSLGSALRPSTSR            |                                 | vimentin [Mus musculus]                                                                                                                  | 1495.796  | 28.58  | 0.77289882  |
| 18152793 | TYYMSAGLQPVPIVFR          |                                 | pyruvate dehydrogenase (lipoamide) beta [Mus musculus]                                                                                   | 1841.9663 | 20.73  | 1.173739857 |
| 21704128 | VAAVQPPEEGPSR             |                                 | eukaryotic translation initiation factor 4B [Mus musculus]                                                                               | 1336.6924 | 35.29  | 1.149343847 |
| 7709980  | VADIGLAAWGR               |                                 | S-adenosylhomocysteine hydrolase [Mus musculus]                                                                                          | 1128.6104 | 55.61  | 1.52650539  |
| 31981549 | VAELNPDENCIR              |                                 | sulfide quinone reductase-like [Mus musculus]                                                                                            | 1372.6595 | 37.33  | 1.485924716 |
| 21312260 | VAEQTPLSALYASLIK          |                                 | aldehyde dehydrogenase 1 family, member B1 [Mus musculus]                                                                                | 1817.046  | 88.61  | 0.69420831  |
| 6753036  | VAEQTPLTALYVANLIK         |                                 | aldehyde dehydrogenase 2, mitochondrial [Mus musculus]                                                                                   | 1844.048  | 32.6   | 3.737016418 |
| 6753036  | VAEQTPLTALYVANLIK         | Deamidation (NQ)                | aldehyde dehydrogenase 2, mitochondrial [Mus musculus]                                                                                   | 1845.0582 | 20.35  | 4.180042627 |
| 6755809  | VAGSVTELIQAAEAMK          |                                 | talin 1 [Mus musculus]                                                                                                                   | 1617.8568 | 25.22  | 0           |
| 63476037 | VAIAQFSDDVR               |                                 | PREDICTED: procollagen, type VI, alpha 3 [Mus musculus]                                                                                  | 1220.625  | 51.37  | 0.437920442 |
| 21704020 | VALIGSPVDLTYR             |                                 | NADH dehydrogenase (ubiquinone) Fe-S protein 1 [Mus musculus]                                                                            | 1403.7919 | 26.08  | 0           |
| 31980648 | VALTGLTVAEYFR             |                                 | ATP synthase, H+ transporting mitochondrial F1 complex, beta subunit [Mus musculus]                                                      | 1439.7992 | 87.43  | 1.118269689 |
| 63476037 | VALVQYSDR                 |                                 | PREDICTED: procollagen, type VI, alpha 3 [Mus musculus]                                                                                  | 1050.5538 | 35.67  | 0.445891538 |
| 18079339 | VAMSHFEPSEYIR             |                                 | aconitase 2, mitochondrial [Mus musculus]                                                                                                | 1565.7443 | 29.84  | 1.073205401 |
| 63746482 | VANPSGNLTDYVQDCGDGTYK     |                                 | PREDICTED: filamin, alpha [Mus musculus]                                                                                                 | 2318.0374 | 152.93 | 0           |
| 31542559 | VAPAPAGVFTDIPISNIR        |                                 | dihydrolipoamide S-acetyltransferase (E2 component of pyruvate dehydrogenase complex) [Mus musculus]                                     | 1838.0162 | 28.43  | 0.988504312 |
| 6671507  | VAPEEHPTLLTEAPLNPK        |                                 | actin, alpha 2, smooth muscle, aorta [Mus musculus]                                                                                      | 1956.0587 | 108.4  | 0.158235429 |
| 6671509  | VAPEEHPVLLTEAPLNPK        |                                 | actin, beta, cytoplasmic [Mus musculus]                                                                                                  | 1954.0781 | 89.52  | 1.096211168 |
| 63694749 | VAPEEHPVLLTEAPLNPK        |                                 | PREDICTED: similar to cytoplasmic beta-actin [Mus musculus]                                                                              | 1954.0781 | 89.52  | 1.096211168 |
| 13385598 | VAQLEQVYIR                |                                 | small nuclear ribonucleoprotein D3 [Mus musculus]                                                                                        | 1218.6838 | 23.62  | 2.041972296 |
| 63746482 | VAQPSITDNKDGTVTVR         |                                 | PREDICTED: filamin, alpha [Mus musculus]                                                                                                 | 1800.949  | 81.68  | 0.463477549 |
| 33563270 | VASSVPVENFTIHGGLSR        |                                 | oxoglutarate dehydrogenase (lipoamide) [Mus musculus]                                                                                    | 1869.9819 | 25.76  | 1.212304092 |
| 63746482 | VATVPQHATSGPGPADVSK       |                                 | PREDICTED: filamin, alpha [Mus musculus]                                                                                                 | 1818.9595 | 99.07  | 0.337389351 |
| 136429   | VATVSLPR                  |                                 | Trypsin precursor                                                                                                                        | 842.5023  | 48.46  | 0.088305068 |
| 63540743 | VAVGQEAFQSVNTR            |                                 | PREDICTED: filamin C, gamma [Mus musculus]                                                                                               | 1505.7786 | 35.58  | 0           |
| 31982186 | VAVLGASGGIGQPLSLLLK       |                                 | malate dehydrogenase 2, NAD (mitochondrial) [Mus musculus]                                                                               | 1793.0942 | 86.28  | 0.858403017 |
| 31982030 | VAVSADPNVNVIVTR           |                                 | Rho GDP dissociation inhibitor (GDI) alpha [Mus musculus]                                                                                | 1650.9258 | 42.68  | 1.15980192  |
| 6753484  | VAVVQYSGGQQQPGR           |                                 | procollagen, type VI, alpha 1 [Mus musculus]                                                                                             | 1701.8745 | 77.16  | 0.383516778 |
| 63476037 | VAVVTYNNEVTTEIR           |                                 | PREDICTED: procollagen, type VI, alpha 3 [Mus musculus]                                                                                  | 1707.9003 | 49.9   | 0           |
| 63476037 | VAVVTYNNEVTTEIR           | Deamidation (NQ)                | PREDICTED: procollagen, type VI, alpha 3 [Mus musculus]                                                                                  | 1708.906  | 35.44  | 0           |
| 46849705 | VAYNPFPGPQFFDLSIR         |                                 | lectin, galactose binding, soluble 4 [Mus musculus]                                                                                      | 1927.9829 | 76.87  | 1.800911    |
| 7305295  | VCHLVGINVDFTR             |                                 | myosin, heavy polypeptide 11, smooth muscle [Mus musculus]                                                                               | 1573.8208 | 72.68  | 0           |
|          |                           | Deamidation (NQ); Oxidation (M) |                                                                                                                                          |           |        |             |
| 37497108 | VCKLIYTMENNSGR            |                                 | Ras and Rab interactor 2 [Mus musculus]                                                                                                  | 1743.8602 | 19.03  | 1.502491809 |
| 33238874 | VDAMHGMGPYVR              |                                 | phosphoglucomutase 5 [Mus musculus]                                                                                                      | 1431.6906 | 24.3   | 0           |
| 42415475 | VDATEESDLAQYQYVGR         |                                 | prolyl 4-hydroxylase, beta polypeptide [Mus musculus]                                                                                    | 1780.8425 | 115.01 | 1.02946283  |
| 45598381 | VDCTADSDVCSAQGVGR         |                                 | thioredoxin domain containing 5 [Mus musculus]                                                                                           | 1625.7036 | 47.38  | 0.937137018 |
| 21312462 | VDDNVLQCLEEYLR            |                                 | glucosaminyl (N-acetyl) transferase 3, mucin type [Mus musculus]                                                                         | 1708.8325 | 26.06  | 1.305378926 |
| 54607098 | VDEYDYSKPIQQQK            |                                 | succinate dehydrogenase Fp subunit [Mus musculus]                                                                                        | 1797.87   | 94.23  | 0.921527234 |
| 31982186 | VDFPQDQLATLTGR            |                                 | malate dehydrogenase 2, NAD (mitochondrial) [Mus musculus]                                                                               | 1560.8105 | 67.22  | 1.200699572 |
| 63738313 | VDIDVPDVIENIGPDAK         |                                 | PREDICTED: similar to AHNAK [Mus musculus]                                                                                               | 1695.8491 | 67.9   | 1.195021791 |
| 63738313 | VDINAPDQVDR               |                                 | PREDICTED: similar to AHNAK [Mus musculus]                                                                                               | 1212.6268 | 21.99  | 2.994515395 |
| 7106435  | VDLQDHGESAYAVYDR          |                                 | tenascin C [Mus musculus]                                                                                                                | 1837.8445 | 74.89  | 0.482331896 |
| 6679108  | VDNDENEHQLSLR             |                                 | nucleophosmin 1 [Mus musculus]                                                                                                           | 1568.7396 | 39.85  | 1.651501238 |
| 6679108  | VDNDENEHQLSLR             | Deamidation (NQ)                | nucleophosmin 1 [Mus musculus]                                                                                                           | 1569.7369 | 51.33  | 3.31684951  |
| 21450277 | VDNSSLTGESEPTQR           |                                 | Na+/K+ -ATPase alpha 1 subunit [Mus musculus]                                                                                            | 1619.7633 | 77.21  | 1.151914185 |
| 31543942 | VDQLTAQLADLAAR            |                                 | vinculin [Mus musculus]                                                                                                                  | 1484.7775 | 72.5   | 0           |
| 6681087  | VQSAVGFYQYQK              |                                 | cortactin [Mus musculus]                                                                                                                 | 1427.6656 | 47.07  | 0           |
| 33186863 | VDTWFNQPAR                |                                 | ribosomal protein L13 [Mus musculus]                                                                                                     | 1233.6077 | 19.81  | 1.388720837 |
| 63746482 | VDVGKQDEFTVK              |                                 | PREDICTED: filamin, alpha [Mus musculus]                                                                                                 | 1364.7052 | 57.94  | 0.993094694 |
| 33859722 | VDVTEQTGLSGR              |                                 | thioredoxin domain containing 1 [Mus musculus]                                                                                           | 1261.6439 | 19.78  | 1.019148158 |

|          |                                |                  |                                                                                                      |           |        |             |
|----------|--------------------------------|------------------|------------------------------------------------------------------------------------------------------|-----------|--------|-------------|
| 7305295  | VDYNASAWLTK                    |                  | myosin, heavy polypeptide 11, smooth muscle [Mus musculus]                                           | 1267.6337 | 83.63  | 0.277464208 |
| 33598964 | VEDMAELTCLNEASVLHNLK           |                  | myosin heavy chain 10, non-muscle [Mus musculus]                                                     | 2229.0776 | 19.05  | 0.916708426 |
| 20137006 | VEDMAELTCLNEASVLHNLK           |                  | myosin, heavy polypeptide 9, non-muscle [Mus musculus]                                               | 2229.0776 | 19.05  | 0.916708426 |
| 63540743 | VEESTQVGGDPPFAVFGDFLGR         |                  | PREDICTED: filamin C, gamma [Mus musculus]                                                           | 2324.1267 | 60.09  | 0.396048675 |
| 31542333 | VEFEELCADLDFDR                 |                  | hypoxia up-regulated 1 [Mus musculus]                                                                | 1585.7244 | 71.95  | 0.94580878  |
| 21313536 | VEGGTPLFTLR                    |                  | dihydropolipoamide S-succinyltransferase (E2 component of 2-oxo-glutarate complex) [Mus musculus]    | 1189.6594 | 25.57  | 0.992037686 |
| 7106435  | VEGYSGTAGDSMNYHNGR             |                  | tenascin C [Mus musculus]                                                                            | 1914.8121 | 62.79  | 1.249106019 |
| 31981722 | VEIIANDQGNR                    |                  | heat shock 70kD protein 5 (glucose-regulated protein) [Mus musculus]                                 | 1228.6317 | 50     | 1.14569942  |
| 7305163  | VEIIANDQGNR                    |                  | heat shock protein 1-like [Mus musculus]                                                             | 1228.6317 | 50     | 1.14569942  |
| 31981690 | VEIIANDQGNR                    |                  | heat shock protein 8 [Mus musculus]                                                                  | 1228.6317 | 50     | 1.14569942  |
| 63704924 | VEIIANDQGNR                    |                  | PREDICTED: heat shock protein 1B [Mus musculus]                                                      | 1228.6317 | 50     | 1.14569942  |
| 63664182 | VEIIANDQGNR                    |                  | PREDICTED: similar to heat shock protein 8 [Mus musculus]                                            | 1228.6317 | 50     | 1.14569942  |
| 63746482 | VEPGLGADNSVVR                  |                  | PREDICTED: filamin, alpha [Mus musculus]                                                             | 1312.6887 | 62.48  | 0.240143365 |
| 11230802 | VEQIAAIAQELNELDYDSSHVNTR       |                  | actinin alpha 4 [Mus musculus]                                                                       | 2905.3887 | 46.76  | 1.117091451 |
| 20373167 | VEQLGAEGNVEESQK                |                  | LUC7-like 2 [Mus musculus]                                                                           | 1616.7842 | 88.37  | 0           |
| 51873060 | VETGVLKPGMVVTFAPVNVVTEVK       |                  | eukaryotic translation elongation factor 1 alpha 1 [Mus musculus]                                    | 2515.3989 | 106.53 | 0.951828112 |
| 51873060 | VETGVLKPGMVVTFAPVNVVTEVK       | Oxidation (M)    | eukaryotic translation elongation factor 1 alpha 1 [Mus musculus]                                    | 2531.3901 | 31.81  | 0.838884542 |
| 33859490 | VETLSQVEVILQQSAADIAR           |                  | laminin B1 subunit 1 [Mus musculus]                                                                  | 2170.1375 | 50.81  | 0.992802335 |
| 46849705 | VFANGQHLDFDSHR                 |                  | lectin, galactose binding, soluble 4 [Mus musculus]                                                  | 1674.8229 | 37.64  | 2.321902539 |
| 22203747 | VFAVITDGR                      |                  | procollagen, type VI, alpha 2 [Mus musculus]                                                         | 1076.6007 | 35.52  | 0           |
| 33859482 | VFDAIMNFR                      |                  | eukaryotic translation elongation factor 2 [Mus musculus]                                            | 1112.5558 | 43.84  | 1.032901287 |
| 33620739 | VFDKEGNGTVMGAEIR               |                  | myosin, light polypeptide 6, alkali, smooth muscle and non-muscle [Mus musculus]                     | 1722.8516 | 53.08  | 0           |
| 31980669 | VFEVSLADLQNDVAFR               |                  | ribosomal protein S3a [Mus musculus]                                                                 | 1951.9786 | 29.16  | 1.666382395 |
| 6754254  | VFIMDNCEELIPEYLNFR             |                  | heat shock protein 1, alpha [Mus musculus]                                                           | 2358.1509 | 37.68  | 1.440581116 |
| 40556608 | VFIMDSCDELIPEYLNFR             |                  | heat shock protein 1, beta [Mus musculus]                                                            | 2317.1528 | 58.44  | 1.46116388  |
| 21361209 | VFLENVIR                       |                  | germinal histone H4 [Mus musculus]                                                                   | 989.5791  | 54.46  | 1.317934385 |
| 6753484  | VFSVAITPDHLEPR                 |                  | procollagen, type VI, alpha 1 [Mus musculus]                                                         | 1580.847  | 56.26  | 0.194598777 |
| 31981549 | VGAENVAIVEPSEK                 |                  | sulfide quinone reductase-like [Mus musculus]                                                        | 1469.7634 | 52.57  | 1.045595856 |
| 6755809  | VGAIPANALDDGQWSQGLISAAR        |                  | talin 1 [Mus musculus]                                                                               | 2310.189  | 51.33  | 0.483601114 |
| 6755478  | VGDVYIPR                       |                  | splicing factor, arginine/serine-rich 2 [Mus musculus]                                               | 918.4982  | 27.68  | 1.524949407 |
| 51491845 | VGEQAQVVIIMNDPSNPIR            |                  | clathrin, heavy polypeptide (Hc) [Mus musculus]                                                      | 2195.1406 | 34.18  | 1.077133673 |
| 6755901  | VGINYQPPTVPPGGDLAK             |                  | tubulin, alpha 1 [Mus musculus]                                                                      | 1824.9908 | 46.71  | 1.267602515 |
| 34740335 | VGINYQPPTVPPGGDLAK             |                  | tubulin, alpha 2 [Mus musculus]                                                                      | 1824.9908 | 46.71  | 1.267602515 |
| 6678467  | VGINYQPPTVPPGGDLAK             |                  | tubulin, alpha 4 [Mus musculus]                                                                      | 1824.9908 | 46.71  | 1.267602515 |
| 6678469  | VGINYQPPTVPPGGDLAK             |                  | tubulin, alpha 6 [Mus musculus]                                                                      | 1824.9908 | 46.71  | 1.267602515 |
| 63476037 | VGLVQYNSDPTDEFFLR              |                  | PREDICTED: procollagen, type VI, alpha 3 [Mus musculus]                                              | 1999.9791 | 45.15  | 0           |
| 63476037 | VGLVQYNSDPTDEFFLR              | Deamidation (NQ) | PREDICTED: procollagen, type VI, alpha 3 [Mus musculus]                                              | 2000.9662 | 60.81  | 0.1253609   |
| 6753620  | VGNLGLATSFNFR                  |                  | DEAD/H (Asp-Glu-Ala-Asp/His) box polypeptide 3, X-linked [Mus musculus]                              | 1524.7905 | 39.85  | 0           |
| 21312260 | VGNPFELDTQQGPQVDKEQFER         |                  | aldehyde dehydrogenase 1 family, member B1 [Mus musculus]                                            | 2561.2185 | 61.11  | 0.745449089 |
| 63746482 | VGSAADIPINISSETDLSSLTATVPPPSGR |                  | PREDICTED: filamin, alpha [Mus musculus]                                                             | 2893.5596 | 117.44 | 0.325844961 |
| 16716467 | VGSGDTNNFPYLEK                 |                  | N-acetylneuraminic acid synthase (sialic acid synthase) [Mus musculus]                               | 1540.7308 | 46.98  | 1.370206416 |
| 46849705 | VGSSGDIALHLNPR                 |                  | lectin, galactose binding, soluble 4 [Mus musculus]                                                  | 1435.7761 | 92.04  | 1.293542535 |
| 29126205 | VGVPTEGALTLNR                  |                  | acetyl-Coenzyme A acyltransferase 2 (mitochondrial 3-oxoacyl-Coenzyme A thiolase) [Mus musculus]     | 1427.7941 | 63.98  | 0.881406833 |
| 63680429 | VGVSQPEDSQDLPGER               |                  | PREDICTED: plexin B2 [Mus musculus]                                                                  | 1968.9282 | 53.38  | 1.24082482  |
| 11230802 | VGWEQLLTTIAR                   |                  | actinin alpha 4 [Mus musculus]                                                                       | 1386.7805 | 71.87  | 1.107353003 |
| 51491845 | VGYPDWIFLLR                    |                  | clathrin, heavy polypeptide (Hc) [Mus musculus]                                                      | 1479.8088 | 40.38  | 2.318530698 |
| 46559834 | VIDSLEDEKEALTLAMADR            |                  | desmuslin isoform M [Mus musculus]                                                                   | 2119.0569 | 89.5   | 0.200163023 |
| 30348966 | VIESTQDLGNDLAGVMALQR           |                  | spectrin beta 2 isoform 1 [Mus musculus]                                                             | 2130.0684 | 26.03  | 1.693563712 |
| 30348966 | VIESTQDLGNDLAGVMALQR           | Deamidation (NQ) | spectrin beta 2 isoform 1 [Mus musculus]                                                             | 2131.0784 | 48.22  | 0           |
| 7305085  | VIFLEDDVAAVVDGR                |                  | glutamine fructose-6-phosphate transaminase 1 [Mus musculus]                                         | 1732.8784 | 84.33  | 0           |
| 6754524  | VIGSGCNLDSAR                   |                  | lactate dehydrogenase 1, A chain [Mus musculus]                                                      | 1191.583  | 72.76  | 1.30364605  |
| 6678674  | VIGSGCNLDSAR                   |                  | lactate dehydrogenase 2, B chain [Mus musculus]                                                      | 1191.583  | 72.76  | 1.30364605  |
| 63664186 | VIGSGCNLDSAR                   |                  | PREDICTED: similar to L-lactate dehydrogenase A chain (LDH-A) (LDH muscle subunit) (LDH-M) [Mus mus] | 1191.583  | 72.76  | 1.30364605  |
| 6679937  | VIIAPSADAPMFVGMVNHKE           |                  | similar to glyceraldehyde-3-phosphate dehydrogenase [Mus musculus]                                   | 2213.1169 | 92.7   | 0           |
| 33469063 | VILQDFTGVPVAVDFAAMR            |                  | aconitase 1 [Mus musculus]                                                                           | 2049.0757 | 34.24  | 1.83644156  |
| 20137006 | VISGVLQGLNIAFK                 |                  | myosin, heavy polypeptide 9, non-muscle [Mus musculus]                                               | 1458.869  | 85.6   | 0           |
| 45597447 | VISLSGEHSIGR                   |                  | superoxide dismutase 1, soluble [Mus musculus]                                                       | 1367.7594 | 58.93  | 1.051804267 |
| 31982178 | VIVVGNPANTNCLTASK              |                  | malate dehydrogenase 1, NAD (soluble) [Mus musculus]                                                 | 1700.9061 | 73.79  | 0           |
| 29293809 | VKSINNPDMR                     | Oxidation (M)    | ATP citrate lyase [Mus musculus]                                                                     | 1189.5903 | 21.49  | 0           |
| 11230802 | VLAVNQENEHLMEDYER              |                  | actinin alpha 4 [Mus musculus]                                                                       | 2088.967  | 59.64  | 1.378760372 |

|          |                               |                                                                                                     |           |        |             |
|----------|-------------------------------|-----------------------------------------------------------------------------------------------------|-----------|--------|-------------|
| 6678449  | VLDASWYSPGTR                  | thiosulfate sulfurtransferase, mitochondrial [Mus musculus]                                         | 1351.6647 | 48.92  | 1.219105186 |
| 7106335  | VLDELTLAR                     | keratin complex 1, acidic, gene 17 [Mus musculus]                                                   | 1029.5889 | 47.04  | 1.692523951 |
| 6680606  | VLDELTLAR                     | keratin complex 1, acidic, gene 19 [Mus musculus]                                                   | 1029.5889 | 47.04  | 1.692523951 |
| 547751   | VLDELTLAR                     | Keratin, type I cytoskeletal 17 (Cytokeratin 17) (K17) (CK 17) (39.1)                               | 1029.5889 | 47.04  | 1.692523951 |
| 417200   | VLDELTLAR                     | Keratin, type I cytoskeletal 19 (Cytokeratin 19) (K19) (CK 19)                                      | 1029.5889 | 47.04  | 1.692523951 |
| 51766008 | VLDNTWPAAPYR                  | PREDICTED: myosin IA [Mus musculus]                                                                 | 1402.707  | 34.78  | 1.246827495 |
| 15617203 | VLDNYLTSPLPEEVEDTSAEDEGISQR   | chloride intracellular channel 1 [Mus musculus]                                                     | 3006.4116 | 74.13  | 1.660252537 |
| 31980648 | VLDSGAPIKIPVGPETLGR           | ATP synthase, H+ transporting mitochondrial F1 complex, beta subunit [Mus musculus]                 | 1919.0908 | 27.73  | 0.976112595 |
| 19923052 | VLEVPPIVYLR                   | brain acyl-CoA hydrolase [Mus musculus]                                                             | 1297.7861 | 30.5   | 0.953396128 |
| 6754854  | VLFDTGLVNPR                   | nidogen 1 [Mus musculus]                                                                            | 1230.6833 | 39.09  | 0.458008686 |
| 60218877 | VLGELWPLFGGR                  | ATP-binding cassette, sub-family D, member 3 [Mus musculus]                                         | 1343.7445 | 53.82  | 0.712856886 |
| 29336026 | VLGLLPEEITAMLR                | nonmuscle myosin heavy chain [Mus musculus]                                                         | 1554.8995 | 48.29  | 1.526056481 |
| 27804325 | VLGSQEALSPVHYEEK              | monoamine oxidase A [Mus musculus]                                                                  | 1785.9113 | 60.61  | 1.035778028 |
| 31982526 | VLIDWINDVLVGER                | parvin, alpha [Mus musculus]                                                                        | 1640.9037 | 53.41  | 0.5611612   |
| 6678499  | VLIGGDETPEGQK                 | UDP-glucose dehydrogenase [Mus musculus]                                                            | 1342.6836 | 70.76  | 0           |
| 6753484  | VLLFSDGNSQGGATAEAEIK          | procollagen, type VI, alpha 1 [Mus musculus]                                                        | 1949.9784 | 121.87 | 0           |
| 13385036 | VLNSYVWGEDSTYK                | ribosomal protein L15 [Mus musculus]                                                                | 1660.7903 | 99.21  | 0           |
| 15426055 | VLQDLVMDILR                   | coatamer protein complex, subunit beta 1 [Mus musculus]                                             | 1314.744  | 33.48  | 1.190750021 |
| 7948997  | VLQDLVNDGPDDRPAQTR            | PDZ and LIM domain 3 [Mus musculus]                                                                 | 1937.9764 | 35.94  | 0.147099358 |
| 6680748  | VLISIGDGIAR                   | ATP synthase, H+ transporting, mitochondrial F1 complex, alpha subunit, isoform 1 [Mus musculus]    | 1000.5732 | 35.91  | 1.106154543 |
| 6754984  | VLSMAPGLTSEVIEPFR             | 3'-phosphoadenosine 5'-phosphosulfate synthase 2 [Mus musculus]                                     | 1830.0321 | 25.3   | 0.954045057 |
| 63556656 | VLSPLEYFR                     | PREDICTED: RIKEN cDNA A430096B05 gene [Mus musculus]                                                | 1123.6118 | 27.92  | 3.204341146 |
| 10946574 | VLTPELYAELR                   | creatine kinase, brain [Mus musculus]                                                               | 1303.725  | 47.24  | 0.22074433  |
| 7657429  | VLTIQIGTSIQDFLEAEDDLSFR       | osteoblast specific factor 2 (fasciclin I-like) [Mus musculus]                                      | 2584.28   | 113.92 | 0.698760815 |
| 7657031  | VLVDMMDGVLADFESGLLQGF         | 5',3'-nucleotidase, cytosolic [Mus musculus]                                                        | 2281.1379 | 43.87  | 3.001061214 |
| 42415475 | VLVGANFEEVAFDEK               | prolyl 4-hydroxylase, beta polypeptide [Mus musculus]                                               | 1666.8198 | 80.51  | 1.210403871 |
| 13569841 | VLVLDVFTPTPLGTR               | thioredoxin reductase 1 [Mus musculus]                                                              | 1627.943  | 30.47  | 1.17340251  |
| 6679078  | VMLGETNPADSKPGTIR             | nucleoside-diphosphate kinase 2 [Mus musculus]                                                      | 1785.918  | 63.33  | 1.492933996 |
| 34576561 | VMQQQQQATQQLPQK               | splicing factor 3a, subunit 1 [Mus musculus]                                                        | 1911.9723 | 76.65  | 2.054622725 |
| 31560611 | VNESTQNWHQLENIGNFIK           | calponin 1 [Mus musculus]                                                                           | 2271.1384 | 83.27  | 0           |
| 7305085  | VNFDDYTVNLGGLK                | glutamine fructose-6-phosphate transaminase 1 [Mus musculus]                                        | 1554.7751 | 64.89  | 0.70708547  |
| 31560689 | VNFSPPGDTSNLFPGTWYLER         | 3-hydroxy-3-methylglutaryl-Coenzyme A synthase 2 [Mus musculus]                                     | 2397.1553 | 77.57  | 0.122613638 |
| 33859482 | VNFTVDQIR                     | eukaryotic translation elongation factor 2 [Mus musculus]                                           | 1091.5846 | 51.26  | 1.357506128 |
| 6678752  | VNGEPLDLPQGTLIYYVDEK          | lymphocyte antigen 74 [Mus musculus]                                                                | 2378.1858 | 71.12  | 2.338964765 |
| 63556656 | VNGVLMALPVYLAGGR              | PREDICTED: RIKEN cDNA A430096B05 gene [Mus musculus]                                                | 1629.9178 | 22.39  | 3.184809237 |
| 9790069  | VNIAFNYDMPEDSDTYLHR           | HLA-B-associated transcript 1A [Mus musculus]                                                       | 2300.0471 | 35.05  | 0           |
| 6755967  | VNNASLIGLYGTQLRPGVK           | voltage-dependent anion channel 3 [Mus musculus]                                                    | 2101.1685 | 29.42  | 0.903328326 |
| 6679439  | VNPTVFFDITADDEPLGR            | peptidylprolyl isomerase A [Mus musculus]                                                           | 2005.9894 | 108.98 | 1.452942539 |
| 6677807  | VNQAIWLLCTGAR                 | ribosomal protein S5 [Mus musculus]                                                                 | 1444.7681 | 23.56  | 3.054576239 |
| 63540743 | VNQPASFAVQLNGAR               | PREDICTED: filamin C, gamma [Mus musculus]                                                          | 1571.8291 | 38.34  | 0           |
| 31981824 | VPAPVASGPDPEEEIR              | ankyrin repeat domain 25 [Mus musculus]                                                             | 1791.8811 | 54.49  | 0           |
| 19525729 | VPDDPEHLAAR                   | crystallin, lamda 1 [Mus musculus]                                                                  | 1219.6071 | 40.95  | 0.935500163 |
| 13385168 | VPDFSDYR                      | ubiquinol-cytochrome c reductase, Rieske iron-sulfur polypeptide 1 [Mus musculus]                   | 998.4575  | 39.96  | 0.910946369 |
| 6755714  | VPENPPSMVFK                   | transgelin [Mus musculus]                                                                           | 1244.6318 | 59.61  | 0           |
| 6753484  | VPNYQALLR                     | procollagen, type VI, alpha 1 [Mus musculus]                                                        | 1073.6089 | 54.89  | 0.233146948 |
| 29126205 | VPPETIDSVIVGNVMQSSDAAYLAR     | acetyl-Coenzyme A acyltransferase 2 (mitochondrial 3-oxoacyl-Coenzyme A thiolase) [Mus musculus]    | 2719.3586 | 44.39  | 0.679023754 |
| 51711855 | VPQLPITNFNR                   | PREDICTED: similar to Filamin C (Gamma-filamin) (Filamin 2) (Protein FLNc) (Actin-binding like prot | 1298.7197 | 22.48  | 0.458060447 |
| 56119103 | VPSTAEALASLMLGFEK             | guanosine diphosphate (GDP) dissociation inhibitor 3 [Mus musculus]                                 | 1979.9902 | 75.65  | 1.026674077 |
| 6679937  | VPTPNVSVVLTCSR                | similar to glyceraldehyde-3-phosphate dehydrogenase [Mus musculus]                                  | 1499.793  | 91.58  | 1.259604633 |
| 37537522 | VPVDVAYQR                     | epiplakin 1 [Mus musculus]                                                                          | 1046.5605 | 56.64  | 1.675703876 |
| 46849705 | VPYVVALQGGTLTVR               | lectin, galactose binding, soluble 4 [Mus musculus]                                                 | 1429.8271 | 100.8  | 1.78220075  |
| 63552538 | VQEVVEVPEDFGPVR               | PREDICTED: echinoderm microtubule associated protein like 2 [Mus musculus]                          | 1599.8103 | 56.41  | 1.014700637 |
| 6754256  | VQQTVDLQFGR                   | heat shock protein 9A [Mus musculus]                                                                | 1290.6807 | 60.69  | 1.594154243 |
| 6754482  | VRPASSAASVYAGAGSGSR           | keratin complex 1, acidic, gene 18 [Mus musculus]                                                   | 1807.9116 | 48.58  | 1.055963148 |
| 54607098 | VSDAISTQYPVVDHEFDVAVVGAGGAGLR | succinate dehydrogenase Fp subunit [Mus musculus]                                                   | 2929.4875 | 43.36  | 0           |
| 7305295  | VSDLTTNLAEEEEK                | myosin, heavy polypeptide 11, smooth muscle [Mus musculus]                                          | 1577.7642 | 79.6   | 0           |
| 21312216 | VSDVVDGNIQGR                  | gasdermin domain containing 1 [Mus musculus]                                                        | 1258.637  | 39.63  | 2.155628041 |
| 37620153 | VSDVVDIEER                    | myosin, light polypeptide kinase telokin isoform [Mus musculus]                                     | 1224.5809 | 67.55  | 0           |
| 30348966 | VSEEAESQWQDTSK                | spectrin beta 2 isoform 1 [Mus musculus]                                                            | 1623.7203 | 40.84  | 0           |
| 7106421  | VSEEAESQWQDTSK                | spectrin beta 2 isoform 2 [Mus musculus]                                                            | 1623.7203 | 40.84  | 0           |

|          |                            |                                                                                                    |           |        |             |
|----------|----------------------------|----------------------------------------------------------------------------------------------------|-----------|--------|-------------|
| 63481281 | VSETVAFTDVNSILR            | PREDICTED: glutamyl-prolyl-tRNA synthetase [Mus musculus]                                          | 1650.8656 | 21.79  | 0           |
| 28916693 | VSNGAGSMSVSLVADENPFAQGALR  | gelsolin [Mus musculus]                                                                            | 2477.2163 | 36.92  | 1.561876658 |
| 63556656 | VSQHGSDVVIETDFGLR          | PREDICTED: RIKEN cDNA A430096B05 gene [Mus musculus]                                               | 1858.9347 | 19.96  | 1.469796149 |
| 6755809  | VSQMAQYFPELTLAAVGAASK      | talin 1 [Mus musculus]                                                                             | 2182.1416 | 27.63  | 1.42632745  |
| 38142460 | VSVISVEEPPQR               | electron transferring flavoprotein, beta polypeptide [Mus musculus]                                | 1339.7227 | 20.47  | 0.608593399 |
| 31982169 | VSVVEPGNFIAATSLYSR         | 3-hydroxybutyrate dehydrogenase (heart, mitochondrial) [Mus musculus]                              | 2136.0981 | 86.67  | 1.300348509 |
| 31543605 | VTAEVVLVHPGGGSTR           | ribophorin I [Mus musculus]                                                                        | 1665.9    | 65.48  | 0.740955126 |
| 63746482 | VTAQGPGLPSGNIANK           | PREDICTED: filamin, alpha [Mus musculus]                                                           | 1652.8733 | 82.25  | 0.2345229   |
| 63660302 | VTASGPGLSAYGVPASLPVEFAIDAR | PREDICTED: filamin B, beta [Mus musculus]                                                          | 2545.3132 | 26.12  | 1.319955334 |
| 31981722 | VTHAVVTVPAYFNDAQR          | heat shock 70kD protein 5 (glucose-regulated protein) [Mus musculus]                               | 1887.973  | 56.4   | 0.89085913  |
| 20799907 | VTIAQGGVLPNIQAVLLPK        | histone 2, H2aa1 [Mus musculus]                                                                    | 1931.1863 | 123.67 | 1.515013222 |
| 34328142 | VTIASLPR                   | lymphoid-restricted membrane protein [Mus musculus]                                                | 856.5162  | 23.09  | 0           |
| 54607098 | VTLEYRVIDK                 | succinate dehydrogenase Fp subunit [Mus musculus]                                                  | 1332.7538 | 23.06  | 0.945830902 |
| 8393150  | VTPPEGYDVVTVFR             | carboxyl terminal LIM domain protein 1 [Mus musculus]                                              | 1578.8259 | 44.47  | 1.217962091 |
| 6755963  | VTQSNFAVGYK                | voltage-dependent anion channel 1 [Mus musculus]                                                   | 1213.6213 | 70.53  | 2.040042011 |
| 6678499  | VTVVDVNEAR                 | UDP-glucose dehydrogenase [Mus musculus]                                                           | 1101.5892 | 34.51  | 0.371831868 |
| 63746482 | VTYTPMAPGSYLISIK           | PREDICTED: filamin, alpha [Mus musculus]                                                           | 1740.9198 | 66.98  | 1.026436187 |
| 6754084  | VTYVDFLAYDILDQYR           | glutathione S-transferase, mu 1 [Mus musculus]                                                     | 1993.9952 | 43.62  | 1.781476583 |
| 58037117 | VVAEPVELAQEFR              | NADH dehydrogenase (ubiquinone) Fe-S protein 3 [Mus musculus]                                      | 1486.7889 | 40.49  | 1.027906939 |
| 6755809  | VVAPTISSPVCQEQLVEAGR       | talin 1 [Mus musculus]                                                                             | 2083.0872 | 39.97  | 0           |
| 46593021 | VVELLADIVQNSLEDSQIEK       | ubiquinol-cytochrome c reductase core protein 1 [Mus musculus]                                     | 2329.2168 | 77.85  | 0.595713436 |
| 63476037 | VVESLDVGPDR                | PREDICTED: procollagen, type VI, alpha 3 [Mus musculus]                                            | 1185.613  | 39.21  | 0           |
| 46849705 | VVFNTMQSQGWGK              | lectin, galactose binding, soluble 4 [Mus musculus]                                                | 1481.7228 | 87.11  | 1.93513884  |
| 20137006 | VVFQEFR                    | myosin, heavy polypeptide 9, non-muscle [Mus musculus]                                             | 924.4819  | 27.14  | 1.987490917 |
| 27754118 | VVHCSDLGLTSPVNPPIFDTR      | asporin [Mus musculus]                                                                             | 2284.1201 | 20.15  | 0           |
| 63476037 | VVIHFTDGADGDMADLYR         | PREDICTED: procollagen, type VI, alpha 3 [Mus musculus]                                            | 1994.9178 | 46.81  | 0           |
| 6678413  | VVLAYEPVVAIGTK             | triosephosphate isomerase 1 [Mus musculus]                                                         | 1602.8861 | 58.73  | 1.154163969 |
| 6680309  | VVLDDKDYFLFR               | heat shock protein 1 (chaperonin 10) [Mus musculus]                                                | 1529.7722 | 25.59  | 1.435453919 |
| 34538601 | VVLPMELEPIR                | cytochrome c oxidase subunit II [Mus musculus]                                                     | 1166.6991 | 39.77  | 1.077493945 |
| 7305169  | VVNVLPVEANLVWQLGR          | heat shock protein 105 [Mus musculus]                                                              | 2035.1144 | 26.41  | 0           |
| 7305295  | VVSSVLQLGNIVFK             | myosin, heavy polypeptide 11, smooth muscle [Mus musculus]                                         | 1502.8982 | 117.8  | 0.174097387 |
| 46849705 | VVVNGNSFYEGHR              | lectin, galactose binding, soluble 4 [Mus musculus]                                                | 1640.787  | 68.06  | 1.429214849 |
| 46849705 | VVVNGNSFYEGHR              | lectin, galactose binding, soluble 4 [Mus musculus]                                                | 1641.7744 | 82.01  | 1.827080515 |
| 6677773  | VWLDPNETNEIANANSR          | ribosomal protein L19 [Mus musculus]                                                               | 1942.9432 | 23.94  | 1.800591067 |
| 6680047  | VWQVTIGTR                  | guanine nucleotide binding protein (G protein), beta polypeptide 2 like 1 [Mus musculus]           | 1059.5938 | 49.98  | 1.807171196 |
| 63481281 | VYEELLAIPVVR               | PREDICTED: glutamyl-prolyl-tRNA synthetase [Mus musculus]                                          | 1400.8248 | 34.4   | 0           |
| 6755142  | VYFDLQIGDESVR              | peptidylprolyl isomerase B [Mus musculus]                                                          | 1597.7811 | 79.88  | 0           |
| 41322904 | VYHDPSTQEPVTVYSLQQR        | plectin 1 isoform 1 [Mus musculus]                                                                 | 2276.094  | 55.75  | 0.872578107 |
| 33859686 | VYWDNGAQIISPHDR            | phosphoglucomutase 1 [Mus musculus]                                                                | 1770.8651 | 23.14  | 0           |
| 46559834 | WAEDQALYAEEAR              | desmuslin isoform M [Mus musculus]                                                                 | 1551.7177 | 52.81  | 0           |
| 30023842 | WALSQSNPSALR               | valosin containing protein [Mus musculus]                                                          | 1329.6884 | 20.86  | 1.991186347 |
| 31981892 | WDDPYDIAR                  | Rho GTPase activating protein 1 [Mus musculus]                                                     | 1313.5867 | 25.68  | 2.120094565 |
| 1346343  | WELLQVDTSTR                | Keratin, type II cytoskeletal 1 (Cytokeratin 1) (K1) (CK 1) (67 kDa cytokeatin) (Hair alpha protei | 1475.7378 | 64.51  | 0           |
| 27754099 | WFLTCINQPFR                | eukaryotic translation elongation factor 1 gamma [Mus musculus]                                    | 1552.7783 | 27.58  | 1.420158623 |
| 63746482 | WGDEHIPPSPYR               | PREDICTED: filamin, alpha [Mus musculus]                                                           | 1413.6595 | 70.99  | 0           |
| 6679937  | WGEAGAEYVVESTGVFTTMEK      | similar to glyceraldehyde-3-phosphate dehydrogenase [Mus musculus]                                 | 2291.0691 | 55.28  | 1.367706163 |
| 31559916 | WGTLTDCVVMR                | heterogeneous nuclear ribonucleoprotein A3 isoform b [Mus musculus]                                | 1280.6102 | 36.25  | 1.478548887 |
| 8567336  | WGVFNEYNNDEK               | chloride channel calcium activated 3 [Mus musculus]                                                | 1514.6615 | 63.41  | 1.521920348 |
| 31543942 | WIDNPTVDDR                 | vinculin [Mus musculus]                                                                            | 1230.5826 | 45.85  | 0.695109961 |
| 51491845 | WLLLGTGISAQQNR             | clathrin, heavy polypeptide (Hc) [Mus musculus]                                                    | 1499.8314 | 23.9   | 1.258391726 |
| 6755965  | WNTDNTLGTIEAIEDQICQGLK     | voltage-dependent anion channel 2 [Mus musculus]                                                   | 2462.2019 | 21.57  | 0           |
| 6755963  | WNTDNTLGTIEITVEDQLAR       | voltage-dependent anion channel 1 [Mus musculus]                                                   | 2176.0571 | 125.01 | 1.32572446  |
| 41322904 | WQAVLAQTDVR                | plectin 1 isoform 1 [Mus musculus]                                                                 | 1286.6829 | 21.54  | 5.799579019 |
| 24762230 | WQNLLPSR                   | ribosomal protein S15a [Mus musculus]                                                              | 1127.5906 | 21.21  | 1.76822223  |
| 6755963  | WTEYGLTFTEK                | voltage-dependent anion channel 1 [Mus musculus]                                                   | 1374.652  | 68.95  | 1.318854335 |
| 27804325 | WVDVGGAYVGPQNR             | monoamine oxidase A [Mus musculus]                                                                 | 1618.8068 | 83.5   | 1.226078144 |
| 6671702  | WVGPEIELIAIATGGR           | chaperonin subunit 5 (epsilon) [Mus musculus]                                                      | 1738.9419 | 19.06  | 0.873703232 |
| 21450277 | WVNDVEDSYGQWVYEQR          | Na <sup>+</sup> /K <sup>+</sup> -ATPase alpha 1 subunit [Mus musculus]                             | 2303.0056 | 85.67  | 1.084679297 |
| 12963633 | WVPLIGEMYGLR               | genes associated with retinoid-IFN-induced mortality 19 [Mus musculus]                             | 1530.8176 | 20.97  | 1.243345281 |
| 18079339 | WVVIGDENYGEGBSSR           | aconitase 2, mitochondrial [Mus musculus]                                                          | 1667.7748 | 75.74  | 0.933709702 |

Deamidation (NQ)



|          |                             |                                                                                                     |           |        |             |
|----------|-----------------------------|-----------------------------------------------------------------------------------------------------|-----------|--------|-------------|
| 6680934  | WWQQEEQLGPEESR              | chromogranin B [Mus musculus]                                                                       | 1801.819  | 26.34  | 0           |
| 31981549 | YADALQEIR                   | sulfide quinone reductase-like [Mus musculus]                                                       | 1191.632  | 55.33  | 1.596062505 |
| 6754854  | YALSNSIGPVR                 | nidogen 1 [Mus musculus]                                                                            | 1176.6343 | 19.64  | 0.549086145 |
| 9790219  | YALYDASFETK                 | destrin [Mus musculus]                                                                              | 1307.6168 | 68.93  | 0           |
| 6680924  | YALYDATYETK                 | cofilin 1, non-muscle [Mus musculus]                                                                | 1337.6302 | 61.05  | 1.239303212 |
| 13195624 | YAPGYNAEVGDK                | NADH dehydrogenase (ubiquinone) 1 alpha subcomplex 10 [Mus musculus]                                | 1283.5923 | 48.36  | 0           |
| 6755995  | YAPSGFYIASGDISGK            | WD repeat domain 1 [Mus musculus]                                                                   | 1632.7869 | 31.33  | 0           |
| 29244560 | YASASEPTEIYR                | hypothetical protein LOC331063 [Mus musculus]                                                       | 1386.6649 | 22.16  | 1.263386034 |
| 22164770 | YDGWPELLELEGCVPR            | oncprotein induced transcript 1 [Mus musculus]                                                      | 1875.9022 | 56.14  | 0           |
| 6753262  | YDPPLEDGAMP SAR             | capping protein (actin filament) muscle Z-line, beta [Mus musculus]                                 | 1518.6836 | 35.81  | 1.287322007 |
| 21704066 | YDPTIEDSYR                  | RAS-related protein-1a [Mus musculus]                                                               | 1258.5654 | 27.42  | 0.777904186 |
| 6755809  | YDQATDTILTVTENIFSSMGDAGEMVR | talin 1 [Mus musculus]                                                                              | 2964.3655 | 90.65  | 0.492945801 |
| 12963769 | YDQGVPEADHLDGSTEERQ         | harmonin isoform a1 [Mus musculus]                                                                  | 2145.9202 | 25.55  | 0           |
| 22267442 | YEDSNNLGTSHLLR              | ubiquinol cytochrome c reductase core protein 2 [Mus musculus]                                      | 1618.7795 | 52.37  | 0           |
| 27370092 | YEEIDNAPEER                 | Tu translation elongation factor, mitochondrial [Mus musculus]                                      | 1364.6    | 56.66  | 0.984011335 |
| 1346343  | YEELQITAGR                  | Keratin, type II cytoskeletal 1 (Cytokeratin 1) (K1) (CK 1) (67 kDa cytokeratin) (Hair alpha protei | 1179.6024 | 53.22  | 0.221114445 |
| 13624315 | YEELQTLAGK                  | keratin complex 2, basic, gene 8 [Mus musculus]                                                     | 1151.5975 | 60.2   | 0           |
| 16716471 | YEHANDDDTSLKSDPEGEK         | hypothetical protein LOC94184 [Mus musculus]                                                        | 2149.9233 | 105.8  | 1.366304221 |
| 7305295  | YEILANAIPK                  | myosin, heavy polypeptide 11, smooth muscle [Mus musculus]                                          | 1202.673  | 50.29  | 0.330747509 |
| 33859482 | YEWDVAEAR                   | eukaryotic translation elongation factor 2 [Mus musculus]                                           | 1138.5204 | 65.43  | 1.711868112 |
| 51764087 | YFAGNLASGGAAGATSLCFVYPLDFAR | PREDICTED: solute carrier family 25 (mitochondrial carrier, adenine nucleotide translocator), membe | 2739.3    | 58.37  | 1.240838137 |
| 22094075 | YFAGNLASGGAAGATSLCFVYPLDFAR | solute carrier family 25, member 5 [Mus musculus]                                                   | 2739.3    | 58.37  | 1.240838137 |
| 27370516 | YFDLGLPNR                   | isocitrate dehydrogenase 2 (NADP+), mitochondrial [Mus musculus]                                    | 1094.5612 | 27.07  | 1.179192979 |
| 31657132 | YFCELLADLSR                 | premature ovarian failure 1B [Mus musculus]                                                         | 1283.6652 | 33.02  | 1.746711213 |
| 51764087 | YFPTQALNFAFK                | PREDICTED: solute carrier family 25 (mitochondrial carrier, adenine nucleotide translocator), membe | 1446.7524 | 57.62  | 1.43646682  |
| 22094075 | YFPTQALNFAFK                | solute carrier family 25, member 5 [Mus musculus]                                                   | 1446.7524 | 57.62  | 1.43646682  |
| 23621467 | YFQFQEEGEGENR               | PREDICTED: actin related protein 2/3 complex, subunit 2 [Mus musculus]                              | 1760.8049 | 24.1   | 0.926691763 |
| 47059123 | YFSLPSVVF SR                | UDP glucuronosyltransferase 1 family, polypeptide A10 [Mus musculus]                                | 1301.6942 | 27.96  | 0.844328901 |
| 46593021 | YFYDQCPAVAGYGPQEQLPDYNR     | ubiquinol-cytochrome c reductase core protein 1 [Mus musculus]                                      | 2679.2322 | 83.91  | 1.07801037  |
| 34328204 | YGEAGDGPWGPPHR              | valyl-tRNA synthetase 2 [Mus musculus]                                                              | 1609.7279 | 36.79  | 1.368332974 |
| 63746482 | YGGDEIPFSPYR                | PREDICTED: filamin, alpha [Mus musculus]                                                            | 1400.6563 | 68.07  | 0.372965994 |
| 22203747 | YGGHFSDQVEVFSPPGSDR         | procollagen, type VI, alpha 2 [Mus musculus]                                                        | 2194.0347 | 56.58  | 0           |
| 21312260 | YGLAAAVFTR                  | aldehyde dehydrogenase 1 family, member B1 [Mus musculus]                                           | 1068.5812 | 40.19  | 0.944816599 |
| 6681087  | YGLFPANYVELR                | cortactin [Mus musculus]                                                                            | 1441.7445 | 22.73  | 1.258847172 |
| 6677975  | YGPIADVSIYDQQR              | splicing factor, arginine/serine-rich 10 (transformer 2 homolog, Drosophila) [Mus musculus]         | 1810.8693 | 21.92  | 0.735206262 |
| 6755817  | YGVNPGPIVGTTR               | thymopoietin [Mus musculus]                                                                         | 1330.7133 | 26.41  | 2.246518412 |
| 6680606  | YGVQLSQIQSVISGFEAQLSDVR     | keratin complex 1, acidic, gene 19 [Mus musculus]                                                   | 2524.3142 | 183.61 | 1.70240479  |
| 40556608 | YHTSQSGDEMSTLSEYVSR         | heat shock protein 1, beta [Mus musculus]                                                           | 2176.9573 | 78.57  | 1.426160625 |
| 34996495 | YHVPVVVPEGSTSDTQEAILR       | ribophorin II [Mus musculus]                                                                        | 2524.2957 | 79.05  | 0.944844975 |
| 63746482 | YIPVQQGPVGVNVTYGGDHIPK      | PREDICTED: filamin, alpha [Mus musculus]                                                            | 2338.2239 | 107.91 | 0           |
| 51770896 | YITPDQLADLYK                | PREDICTED: similar to Alpha enolase (2-phospho-D-glycerate hydro-lyase) (Non-neural enolase) (NNE)  | 1439.7288 | 61.27  | 0.914677172 |
| 16716381 | YLDLILNDFVR                 | lysyl-tRNA synthetase [Mus musculus]                                                                | 1380.7551 | 32.36  | 1.587114604 |
| 18875380 | YLECSALTQR                  | RAS-related C3 botulinum substrate 3 [Mus musculus]                                                 | 1183.5825 | 29.18  | 2.865112578 |
| 6678449  | YLGTPPEPDIVGLDSGHIR         | thiosulfate sulfurtransferase, mitochondrial [Mus musculus]                                         | 2067.0339 | 50.49  | 0.805616858 |
| 31560645 | YLLSQSSPAPLTAEEELR          | twinfilin [Mus musculus]                                                                            | 2075.0605 | 39.89  | 0.94918524  |
| 7305295  | YLPYISEK                    | myosin, heavy polypeptide 11, smooth muscle [Mus musculus]                                          | 1012.5289 | 40.43  | 0.234802273 |
| 41322904 | YLQDLLAWVEENQR              | plectin 1 isoform 1 [Mus musculus]                                                                  | 1776.8932 | 58.68  | 1.366474982 |
| 22165384 | YLTVAAVFR                   | tubulin, beta, 2 [Mus musculus]                                                                     | 1039.5938 | 36.49  | 1.100173467 |
| 31981939 | YLTVAAVFR                   | tubulin, beta 4 [Mus musculus]                                                                      | 1039.5938 | 36.49  | 1.100173467 |
| 7106439  | YLTVAAVFR                   | tubulin, beta 5 [Mus musculus]                                                                      | 1039.5938 | 36.49  | 1.100173467 |
| 33859506 | YMCENQATISSK                | albumin 1 [Mus musculus]                                                                            | 1374.609  | 73.37  | 2.098818486 |
| 63660302 | YMIGVTYGGDNIPLSPYR          | PREDICTED: filamin B, beta [Mus musculus]                                                           | 2015.9944 | 25.01  | 1.58104274  |
| 6679078  | YMNSGPPVAMVWEGLNVVK         | nucleoside-diphosphate kinase 2 [Mus musculus]                                                      | 2093.0579 | 36.12  | 0.948362222 |
| 6678573  | YNDEPVQIR                   | villin 1 [Mus musculus]                                                                             | 1133.5593 | 31.81  | 1.969094576 |
| 63746482 | YNDQHIGSPFTAR               | PREDICTED: filamin, alpha [Mus musculus]                                                            | 1602.7739 | 80.41  | 0.36577749  |
| 19072792 | YNGDNVIYKPPGR               | thioredoxin domain containing 4 [Mus musculus]                                                      | 1492.7568 | 39.95  | 0           |
| 6753138  | YNPNVLPVQCTGK               | Na+/K+ -ATPase beta 1 subunit [Mus musculus]                                                        | 1432.7258 | 32.49  | 1.584742989 |
| 51771420 | YNVLGAETVLTQMR              | PREDICTED: hypothetical protein LOC68693 [Mus musculus]                                             | 1594.8214 | 33.59  | 1.532451602 |
| 42741690 | YPEAPPSVR                   | ubiquitin-conjugating enzyme E2 variant 1 [Mus musculus]                                            | 1015.5206 | 35.07  | 1.087546281 |
| 6671507  | YPIEHGIITNWDMEK             | actin, alpha 2, smooth muscle, aorta [Mus musculus]                                                 | 1960.9279 | 62.24  | 1.072204208 |

|          |                        |                                                                                 |           |       |             |
|----------|------------------------|---------------------------------------------------------------------------------|-----------|-------|-------------|
| 6755965  | YQLDPTASISAK           | voltage-dependent anion channel 2 [Mus musculus]                                | 1293.6552 | 20.65 | 0           |
| 6755963  | YQVDPDACFSAK           | voltage-dependent anion channel 1 [Mus musculus]                                | 1343.6036 | 53.82 | 1.329269096 |
| 13386110 | YRPAAEIDLLR            | hypothetical protein LOC68226 [Mus musculus]                                    | 1316.7499 | 19.41 | 1.159073369 |
| 31982223 | YSEIEPSTEGEVIYR        | laminin, beta 2 [Mus musculus]                                                  | 1771.8477 | 53.48 | 0           |
| 8394024  | YSFLQFDPAPR            | protein phosphatase 2a, catalytic subunit, beta isoform [Mus musculus]          | 1340.6699 | 19.92 | 0           |
| 23956406 | YSGGLPLPPSYVPVVMSELSDR | UDP glucuronosyltransferase 2 family, polypeptide B34 [Mus musculus]            | 2363.2046 | 26.92 | 1.130668463 |
| 63474405 | YSMPDNSPETR            | PREDICTED: tensin [Mus musculus]                                                | 1296.5575 | 29.55 | 0           |
| 63746482 | YSPSEAGLHEMDIR         | PREDICTED: filamin, alpha [Mus musculus]                                        | 1604.7498 | 68.9  | 0           |
| 6755863  | YSQFINFPIYVWSSK        | tumor rejection antigen gp96 [Mus musculus]                                     | 1878.938  | 25.28 | 2.42831489  |
| 46559834 | YSWQDEIAQGTWR          | desmuslin isoform M [Mus musculus]                                              | 1639.745  | 50.05 | 0           |
| 6671539  | YTPSQSGAAASELSFISNHAY  | aldolase 1, A isoform [Mus musculus]                                            | 2258.031  | 85.93 | 0.997273198 |
| 6754016  | YTTPEDATPEPGEDPR       | guanine nucleotide binding protein alpha stimulating isoform b [Mus musculus]   | 1774.7831 | 49.13 | 1.194628667 |
| 6680854  | YVDSEGHLYTVPIR         | caveolin, caveolae protein 1 [Mus musculus]                                     | 1648.8323 | 64.73 | 0.410946695 |
| 13386062 | YVEEQPGNLQR            | hypothetical protein LOC68117 [Mus musculus]                                    | 1332.6603 | 33.69 | 0.942658669 |
| 31543349 | YVGESEANIR             | N-ethylmaleimide sensitive fusion protein [Mus musculus]                        | 1137.5559 | 35.96 | 0           |
| 31541863 | YVNWIQQTIAAN           | RIKEN cDNA 2210010C04 [Mus musculus]                                            | 1420.7249 | 79.24 | 0           |
| 40254244 | YVQELPLETDGALR         | loss of heterozygosity, 11, chromosomal region 2, gene A homolog [Mus musculus] | 1603.8314 | 36.67 | 2.115125429 |
| 64427157 | YVVDSDTVQAHTVR         | PREDICTED: synaptopodin 2 [Mus musculus]                                        | 1589.7892 | 80.28 | 0.465509955 |
| 6681143  | YWEIFPNTFR             | decorin [Mus musculus]                                                          | 1372.6742 | 25.84 | 0.634499736 |
| 27754118 | YWEIQPATFR             | asporin [Mus musculus]                                                          | 1310.652  | 38.38 | 0.447558057 |
| 6678499  | YWQQVIDMNDYQR          | UDP-glucose dehydrogenase [Mus musculus]                                        | 1758.8051 | 50.13 | 0.949933273 |
| 31982290 | YYEPYAAAGPSYGGR        | LIM domain containing preferred translocation partner in lipoma [Mus musculus]  | 1713.7595 | 69.8  | 0.556368756 |
| 23943876 | YVIVGLQVR              | zymogen granule membrane protein 16 [Mus musculus]                              | 1110.629  | 37.51 | 3.798331932 |
| 6755354  | YYPTEDVPR              | ribosomal protein L6 [Mus musculus]                                             | 1139.5391 | 33.75 | 1.523438235 |
| 63556656 | YYVLGATFYPGPECER       | PREDICTED: RIKEN cDNA A430096B05 gene [Mus musculus]                            | 1864.8593 | 22.52 | 2.670763222 |
| 51873060 | YYVTIIDAPGHR           | eukaryotic translation elongation factor 1 alpha 1 [Mus musculus]               | 1404.7323 | 23.88 | 1.32459851  |

## Mouse Pair 3

| GI #     | Sequence                  | Modifications    | Protein Name                                                                                               | M/z       | Highest Mascot score | Average Ratio (15N:14N), non-Log-transformed |
|----------|---------------------------|------------------|------------------------------------------------------------------------------------------------------------|-----------|----------------------|----------------------------------------------|
| 33859554 | AAAEVNEQYGLDPK            |                  | fumarate hydratase 1 [Mus musculus]                                                                        | 1504.7223 | 69.26                | 0                                            |
| 57634518 | AAAQLLQSQAQQSGAQQTK       |                  | septin 11 [Mus musculus]                                                                                   | 1957.0112 | 72.15                | 1.215810433                                  |
| 33859506 | AADKDTCFSTEGPNLVTR        |                  | albumin 1 [Mus musculus]                                                                                   | 1924.9061 | 49.89                | 1.808824086                                  |
| 6756033  | AADPPAENSSAPEAEQGGAE      |                  | nuclease sensitive element binding protein 1 [Mus musculus]                                                | 1897.7997 | 85.55                | 1.354769357                                  |
| 29789080 | AAESLADPTEYENLFPGLK       |                  | coatamer protein complex, subunit beta 2 (beta prime) [Mus musculus]                                       | 2065.0112 | 66.04                | 0.983041071                                  |
| 31981925 | AAFDDAIAELDTLSEESYK       |                  | tyrosine 3-monooxygenase/tryptophan 5-monooxygenase activation protein, epsilon polypeptide [Mus musculus] | 2087.978  | 85.84                | 1.102580567                                  |
| 6753036  | AAFQLGSPWR                |                  | aldehyde dehydrogenase 2, mitochondrial [Mus musculus]                                                     | 1132.5895 | 31.3                 | 2.139532284                                  |
| 6724311  | AAGAARIIVDINK             | Deamidation (NQ) | alcohol dehydrogenase 1 (class I) [Mus musculus]                                                           | 1383.8196 | 21.23                | 0                                            |
| 6680606  | AALEGTLAETEAR             |                  | keratin complex 1, acidic, gene 19 [Mus musculus]                                                          | 1331.6812 | 64.76                | 1.49662011                                   |
| 29126205 | AANEAGYFNEEMAPIEVK        |                  | acetyl-Coenzyme A acyltransferase 2 (mitochondrial 3-oxoacyl-Coenzyme A thiolase) [Mus musculus]           | 1982.9382 | 25.97                | 1.303376707                                  |
| 13385006 | AANNGALPPDLSYIVR          |                  | cytochrome c-1 [Mus musculus]                                                                              | 1670.8837 | 28.45                | 1.466027529                                  |
| 27754065 | AAPFTLEYR                 |                  | pyrophosphatase [Mus musculus]                                                                             | 1067.5601 | 37.56                | 1.352918179                                  |
| 6677995  | AAQSPQQHSSGDPTEESPV       |                  | solute carrier family 16, member 1 [Mus musculus]                                                          | 2080.9092 | 93.08                | 1.408448746                                  |
| 8567336  | AASATLPPITVTPVNVK         |                  | chloride channel calcium activated 3 [Mus musculus]                                                        | 1678.9706 | 62.13                | 0                                            |
| 63474405 | AASDGGYENQSPEATSPR        |                  | PREDICTED: tensin [Mus musculus]                                                                           | 1907.8383 | 56.77                | 1.547021376                                  |
| 7304889  | AASGFNATEDAQTLR           |                  | annexin A4 [Mus musculus]                                                                                  | 1551.7439 | 94.01                | 1.719330088                                  |
| 6678483  | AAVASLLQSVQVPEFTPK        |                  | ubiquitin-activating enzyme E1, Chr X [Mus musculus]                                                       | 1885.0399 | 47.29                | 0.902248037                                  |
| 31981826 | AAVDAGFVFNPMQVQGTGK       |                  | electron transferring flavoprotein, alpha polypeptide [Mus musculus]                                       | 1904.9149 | 29.84                | 0                                            |
| 51770896 | AAVPSGASTGIYEALRL         |                  | PREDICTED: similar to Alpha enolase (2-phospho-D-glycerate hydro-lyase) (Non-neural enolase) (NNE)         | 1804.9504 | 103.81               | 2.0694588                                    |
| 22094075 | AAYFGIYDTAK               |                  | solute carrier family 25, member 5 [Mus musculus]                                                          | 1219.6038 | 67.76                | 0.980257888                                  |
| 6671539  | ADDGRPFQVIK               |                  | aldolase 1, A isoform [Mus musculus]                                                                       | 1342.7147 | 39.2                 | 1.194458855                                  |
| 34328489 | ADFDNTVAIHPTSSSEELVTLR    |                  | glutathione reductase 1 [Mus musculus]                                                                     | 2315.1563 | 52.5                 | 2.188657304                                  |
| 6753598  | ADFQGISPER                |                  | defender against cell death 1 [Mus musculus]                                                               | 1119.545  | 22.27                | 0                                            |
| 31981522 | ADIELFVNR                 |                  | transmembrane 9 superfamily member 2 [Mus musculus]                                                        | 1076.5709 | 24.86                | 1.014498875                                  |
| 6754084  | ADIVENQVMDTR              |                  | glutathione S-transferase, mu 1 [Mus musculus]                                                             | 1390.6617 | 60.74                | 1.039752452                                  |
| 547749   | ADLEMQIESLTELAYLK         | Oxidation (M)    | Keratin, type I cytoskeletal 10 (Cytokeratin 10) (K10) (CK 10)                                             | 2112.0422 | 86.73                | 0                                            |
| 6754254  | ADLNNLGTIAK               |                  | heat shock protein 1, alpha [Mus musculus]                                                                 | 1242.6915 | 43.55                | 1.342167165                                  |
| 40556608 | ADLNNLGTIAK               |                  | heat shock protein 1, beta [Mus musculus]                                                                  | 1242.6915 | 43.55                | 1.342167165                                  |
| 33859811 | ADMVIEAVFEDLGVK           |                  | hydroxyacyl-Coenzyme A dehydrogenase/3-ketoacyl-Coenzyme A thiolase/enoyl-Coenzyme A hydratase (tri        | 1635.83   | 80.36                | 1.549564867                                  |
| 31981100 | ADRDESSPYAAMLAQDVAQR      |                  | ribosomal protein S14 [Mus musculus]                                                                       | 2265.0562 | 42.24                | 2.235278843                                  |
| 31560731 | ADYAQLLEDQMNAFR           |                  | ATPase, H+ transporting, V1 subunit A, isoform 1 [Mus musculus]                                            | 1784.8339 | 22.52                | 1.400125703                                  |
| 13399310 | AEAGAGSATEFQFR            |                  | ribosomal protein S10 [Mus musculus]                                                                       | 1441.6774 | 39.8                 | 0.83431684                                   |
| 6996913  | AEDGSDVIDYELIQDAR         |                  | annexin A2 [Mus musculus]                                                                                  | 1908.8928 | 61.23                | 1.363990223                                  |
| 21703832 | AIEFGPPGPGPGSR            |                  | arginyl aminopeptidase (aminopeptidase B) [Mus musculus]                                                   | 1225.5989 | 22.19                | 1.304689494                                  |
| 6678573  | AELGNSGDWSQIADEVMSPK      |                  | villin 1 [Mus musculus]                                                                                    | 2133.9849 | 73.36                | 0.844094937                                  |
| 6755372  | AELNEFLTR                 |                  | ribosomal protein S3 [Mus musculus]                                                                        | 1092.5671 | 30.85                | 0.742891359                                  |
| 13386054 | AENFFILR                  |                  | actin related protein 2/3 complex, subunit 4 [Mus musculus]                                                | 1009.5494 | 35.13                | 0.93737522                                   |
| 6678483  | AENYDISPADR               |                  | ubiquitin-activating enzyme E1, Chr X [Mus musculus]                                                       | 1250.5728 | 56.6                 | 0.996018312                                  |
| 23956222 | AEPEDHYFLLTEPPLNTPENR     |                  | ARP3 actin-related protein 3 homolog [Mus musculus]                                                        | 2482.1643 | 68.5                 | 1.103643882                                  |
| 20149726 | AETAPLPTSVDDTPEVLNR       |                  | phosphatidate cytidyltransferase 2 [Mus musculus]                                                          | 2025.0079 | 68.86                | 2.616810997                                  |
| 14149645 | AETSESSGSAVAPEASAPK       |                  | methyl CpG binding protein 2 [Mus musculus]                                                                | 1959.8849 | 21.07                | 0                                            |
| 63746482 | AEVGVPAEFGIWTR            |                  | PREDICTED: filamin, alpha [Mus musculus]                                                                   | 1531.8018 | 68.86                | 1.617163351                                  |
| 6753294  | AEVQNLGGELVSVGDSAMSLIQAAK |                  | catenin alpha 1 [Mus musculus]                                                                             | 2586.3286 | 28.3                 | 1.449113902                                  |
| 29293809 | AFDSGIIMEFVNK             |                  | ATP citrate lyase [Mus musculus]                                                                           | 1567.7742 | 27.45                | 1.964736488                                  |
| 63746482 | AFGPGQLQGGNAGSPAR         |                  | PREDICTED: filamin, alpha [Mus musculus]                                                                   | 1456.7349 | 104.8                | 1.670095236                                  |
| 8567402  | AFGYYGPLR                 |                  | splicing factor, arginine/serine-rich 3 (SRp20) [Mus musculus]                                             | 1043.5364 | 27.97                | 1.280756456                                  |
| 13384888 | AFIFPQESSTAYVSLIPK        |                  | hypothetical protein LOC66289 [Mus musculus]                                                               | 1998.0565 | 111.36               | 0                                            |
| 7710086  | AFLTAEIDILR               |                  | RAB10, member RAS oncogene family [Mus musculus]                                                           | 1261.7227 | 49.25                | 1.326189996                                  |
| 51491845 | AFMTADLPNELIELLEK         |                  | clathrin, heavy polypeptide (Hc) [Mus musculus]                                                            | 1947.0143 | 54.28                | 1.427239585                                  |
| 6755781  | AFSGLTQNPESIELR           |                  | thrombospondin 4 [Mus musculus]                                                                            | 1661.8323 | 37.51                | 0                                            |
| 6677991  | AFYAPVHADDLR              |                  | solute carrier family 12, member 2 [Mus musculus]                                                          | 1374.6862 | 37                   | 2.210525536                                  |
| 31982186 | AGAGSATLSMAYAGAR          |                  | malate dehydrogenase 2, NAD (mitochondrial) [Mus musculus]                                                 | 1454.709  | 71.19                | 1.115027974                                  |
| 6671507  | AGFAGDDAPR                |                  | actin, alpha 2, smooth muscle, aorta [Mus musculus]                                                        | 976.4518  | 52.96                | 1.029200041                                  |
| 6671509  | AGFAGDDAPR                |                  | actin, beta, cytoplasmic [Mus musculus]                                                                    | 976.4518  | 52.96                | 1.029200041                                  |

|          |                             |                                                                                                     |           |        |             |
|----------|-----------------------------|-----------------------------------------------------------------------------------------------------|-----------|--------|-------------|
| 18266680 | AGGAGVPAFYTSTGYGLTVQEGGSPIK | 3-oxoacid CoA transferase 1 [Mus musculus]                                                          | 2585.2849 | 40.29  | 1.42511251  |
| 31982275 | AGGIETIANEYSDR              | heat shock protein 4 [Mus musculus]                                                                 | 1495.705  | 27.96  | 0           |
| 33859811 | AGLEQSSDAGYLAESQK           | hydroxyacyl-Coenzyme A dehydrogenase/3-ketoacyl-Coenzyme A thiolase/enoyl-Coenzyme A hydratase (tri | 1723.8142 | 103.41 | 1.285021036 |
| 20799907 | AGLQFPVGR                   | histone 2, H2aa1 [Mus musculus]                                                                     | 944.5352  | 52.67  | 0.779666653 |
| 63562740 | AGLSLMWNR                   | PREDICTED: similar to secreted gel-forming mucin [Mus musculus]                                     | 1047.5447 | 20.56  | 0.44737913  |
| 31982223 | AGNSLAASTAEETAGSAQSR        | laminin, beta 2 [Mus musculus]                                                                      | 1878.88   | 46.48  | 0.949117888 |
| 11230802 | AGTQIENIDEDFR               | actinin alpha 4 [Mus musculus]                                                                      | 1507.7    | 55.82  | 0.959189202 |
| 59709449 | AGTQIENIEEDFR               | actinin alpha 2 [Mus musculus]                                                                      | 1521.7247 | 50.93  | 1.401465542 |
| 7106453  | AGYSQGATQYTQAQQAR           | zinc finger RNA binding protein [Mus musculus]                                                      | 1828.86   | 22.86  | 1.27690816  |
| 31980648 | AIAELGIYPAVDPLDSTSR         | ATP synthase, H+ transporting mitochondrial F1 complex, beta subunit [Mus musculus]                 | 1988.038  | 94.78  | 1.06708932  |
| 39652626 | AIAGIINQPYNYQAGPDAALGR      | bisphosphate 3'-nucleotidase 1 [Mus musculus]                                                       | 2436.25   | 59.36  | 3.880380672 |
| 6755004  | AIASATEGGSVPQIR             | programmed cell death 8 [Mus musculus]                                                              | 1456.77   | 47.72  | 1.585249167 |
| 12963569 | AIENIDLTNLLESFLGK           | protein phosphatase-1 regulatory subunit 7 [Mus musculus]                                           | 1991.0343 | 23.48  | 0           |
| 31560653 | AIGVLTSGGDAQGMNAAVR         | phosphofructokinase, liver, B-type [Mus musculus]                                                   | 1787.8901 | 63.26  | 1.049512968 |
| 9790051  | AIGVLTSGGDAQGMNAAVR         | phosphofructokinase, platelet [Mus musculus]                                                        | 1787.8901 | 63.26  | 1.049512968 |
| 12963615 | AILVDLEPGTMDSVR             | tubulin, beta 3 [Mus musculus]                                                                      | 1615.8369 | 53.05  | 0           |
| 7106439  | AILVDLEPGTMDSVR             | tubulin, beta 5 [Mus musculus]                                                                      | 1615.8369 | 53.05  | 0           |
| 21746161 | AILVDLEPGTMDSVR             | tubulin, beta [Mus musculus]                                                                        | 1615.8369 | 53.05  | 0           |
| 6755198  | AINQGGLTSVAVR               | proteasome (prosome, macropain) subunit, alpha type 6 [Mus musculus]                                | 1285.7211 | 59     | 0.909156103 |
| 31543942 | AIPDLTAPVAAVQAAVSNLVR       | vinculin [Mus musculus]                                                                             | 2076.1863 | 48.59  | 1.192683304 |
| 6753864  | AIVAGDQNVVEYK               | four and a half LIM domains 1 [Mus musculus]                                                        | 1306.6627 | 68.71  | 1.304577602 |
| 31560560 | AIVAIENPADVSVISSR           | laminin receptor 1 (ribosomal protein SA) [Mus musculus]                                            | 1740.9559 | 69.08  | 1.112331767 |
| 31981722 | AKFEELNMDLFR                | heat shock 70kD protein 5 (glucose-regulated protein) [Mus musculus]                                | 1512.7599 | 31.23  | 0           |
| 29789343 | AKPAAQSEETATSPAASPTQSAER    | eukaryotic translation initiation factor 3, subunit 9 [Mus musculus]                                | 2612.2388 | 51.41  | 1.091180453 |
| 9845257  | ALAAAAGYDVEK                | histone 1, H1c [Mus musculus]                                                                       | 1107.5665 | 87.23  | 0.723504647 |
| 34328365 | ALAAAAGYDVEK                | histone 1, H1d [Mus musculus]                                                                       | 1107.5665 | 87.23  | 0.723504647 |
| 13430890 | ALAAAAGYDVEK                | histone 1, H1e [Mus musculus]                                                                       | 1107.5665 | 87.23  | 0.723504647 |
| 13386370 | ALAIYSQLGPDNPVNVAR          | kinesin-like 8 [Mus musculus]                                                                       | 1927.9874 | 38.91  | 0           |
| 6755809  | ALDGDFTENR                  | talin 1 [Mus musculus]                                                                              | 1266.5776 | 28.59  | 1.839568845 |
| 63471580 | ALDIAENEMPGLMR              | PREDICTED: similar to S-adenosylhomocysteine hydrolase [Mus musculus]                               | 1559.767  | 55.77  | 1.395900136 |
| 58037267 | ALDLFSDNAPPPELLEIINEDIAK    | protein disulfide isomerase-associated 6 [Mus musculus]                                             | 2637.3643 | 21.52  | 0.760335364 |
| 547749   | ALEESNYELEGK                | Keratin, type I cytoskeletal 10 (Cytokeratin 10) (K10) (CK 10)                                      | 1381.6454 | 75.17  | 0           |
| 33598964 | ALELDPNLYR                  | myosin heavy chain 10, non-muscle [Mus musculus]                                                    | 1203.6425 | 48.56  | 1.572437965 |
| 7305295  | ALELDPNLYR                  | myosin, heavy polypeptide 11, smooth muscle [Mus musculus]                                          | 1203.6425 | 48.56  | 1.572437965 |
| 20137006 | ALELDSNLYR                  | myosin, heavy polypeptide 9, non-muscle [Mus musculus]                                              | 1193.6132 | 61.19  | 0.992468961 |
| 23956212 | ALEPEEGNPQTEAQENGPER        | HIV TAT specific factor 1 [Mus musculus]                                                            | 2194.9944 | 106.25 | 1.216330791 |
| 6680606  | ALEQANGELEVK                | keratin complex 1, acidic, gene 19 [Mus musculus]                                                   | 1300.6733 | 82.99  | 1.269984114 |
| 6679687  | ALEQLQEYFQDGNLK             | glucose regulated protein [Mus musculus]                                                            | 1814.8999 | 20.26  | 0.788204997 |
| 20137006 | ALEQQVEEMK                  | myosin, heavy polypeptide 9, non-muscle [Mus musculus]                                              | 1204.5647 | 31.09  | 1.210146877 |
| 7305295  | ALETQMEEMK                  | myosin, heavy polypeptide 11, smooth muscle [Mus musculus]                                          | 1209.5547 | 47.06  | 2.092556935 |
| 36031035 | ALEYTIYNQELNETR             | chondroitin sulfate proteoglycan 6 [Mus musculus]                                                   | 1856.8661 | 26.13  | 0.751851044 |
| 27754099 | ALIAAQYSGAQVR               | eukaryotic translation elongation factor 1 gamma [Mus musculus]                                     | 1347.7419 | 71.58  | 0           |
| 63489754 | ALINADELANDVAGAEALLDR       | PREDICTED: similar to Spectrin alpha chain, brain (Spectrin, non-erythroid alpha chain) (Alpha-II s | 2154.1052 | 88.48  | 1.048535174 |
| 6671666  | ALLATASQCQQPAGNK            | CAP, adenylate cyclase-associated protein 1 [Mus musculus]                                          | 1600.8027 | 30.77  | 0.909830128 |
| 33859482 | ALLELQLEPEELYQTQFR          | eukaryotic translation elongation factor 2 [Mus musculus]                                           | 2220.1545 | 54.53  | 0.943799146 |
| 40556608 | ALLFIPR                     | heat shock protein 1, beta [Mus musculus]                                                           | 829.5453  | 39.75  | 1.098591806 |
| 34328489 | ALLTPVAIAAGR                | glutathione reductase 1 [Mus musculus]                                                              | 1152.7126 | 26.67  | 1.23449606  |
| 63476037 | ALNLGYALDYALR               | PREDICTED: procollagen, type VI, alpha 3 [Mus musculus]                                             | 1452.7876 | 39.68  | 0.896549352 |
| 34328204 | ALNPLEDWLR                  | valyl-tRNA synthetase 2 [Mus musculus]                                                              | 1226.6598 | 27.39  | 0.859070726 |
| 63506192 | ALPFWNEEIVPQIK              | PREDICTED: similar to phosphoglycerate mutase (EC 5.4.2.1) B chain - rat [Mus musculus]             | 1683.8973 | 28.33  | 1.160738418 |
| 31981810 | ALQLGLTFSPAALK              | dodecenoyl-Coenzyme A delta isomerase (3,2 trans-enoyl-Coenzyme A isomerase) [Mus musculus]         | 1558.8644 | 27.67  | 0           |
| 21704020 | ALSEIAGITLPTYDLTDQVR        | NADH dehydrogenase (ubiquinone) Fe-S protein 1 [Mus musculus]                                       | 2075.1038 | 77.56  | 1.487430713 |
| 21703972 | ALTTQLTDAELAQQR             | malic enzyme 2, NAD(+)-dependent, mitochondrial [Mus musculus]                                      | 1587.8409 | 45.24  | 1.592529654 |
| 22165384 | ALTVPELTQQMFDAK             | tubulin, beta, 2 [Mus musculus]                                                                     | 1691.8728 | 50.74  | 1.118627103 |
| 12963615 | ALTVPELTQQMFDAK             | tubulin, beta 3 [Mus musculus]                                                                      | 1691.8728 | 50.74  | 1.118627103 |
| 31981939 | ALTVPELTQQMFDAK             | tubulin, beta 4 [Mus musculus]                                                                      | 1691.8728 | 50.74  | 1.118627103 |
| 27754056 | ALTVPELTQQMFDAK             | tubulin, beta 6 [Mus musculus]                                                                      | 1691.8728 | 50.74  | 1.118627103 |
| 7106439  | ALTVPELTQQVFDK              | tubulin, beta 5 [Mus musculus]                                                                      | 1659.8954 | 50.39  | 0.819614776 |
| 63655455 | ALVGSENPPLTVIR              | PREDICTED: similar to Ras GTPase-activating-like protein IQGAP2 [Mus musculus]                      | 1465.842  | 27.66  | 0.996105454 |
| 31980953 | ALVVTVDPAPVLGNR             | hydroxyacid oxidase (glycolate oxidase) 3 [Mus musculus]                                            | 1423.8226 | 48.89  | 0           |

|          |                              |                                                                                                     |           |        |             |
|----------|------------------------------|-----------------------------------------------------------------------------------------------------|-----------|--------|-------------|
| 6754556  | ALYETELADAR                  | lamin B1 [Mus musculus]                                                                             | 1251.6228 | 41.64  | 0.927996571 |
| 19526818 | ALYSNILGEENTYLWR             | solute carrier family 25 (mitochondrial carrier, phosphate carrier), member 3 [Mus musculus]        | 1941.9729 | 44.47  | 1.495442144 |
| 31981983 | AMAEEDNGSIGEETDSSPGR         | stromal interaction molecule 1 [Mus musculus]                                                       | 2051.8545 | 111.15 | 1.10340186  |
| 21704100 | AMSDWFAQNYMGR                | hydroxyacyl-Coenzyme A dehydrogenase/3-ketoacyl-Coenzyme A thiolase/enoyl-Coenzyme A hydratase (tri | 1691.7074 | 57.47  | 1.210198578 |
| 20874851 | AMGIMNSFVNDIFER              | PREDICTED: similar to histone H2b-616 [Mus musculus]                                                | 1743.8285 | 92.49  | 0.666532297 |
| 20874851 | AMGIMNSFVNDIFER              | PREDICTED: similar to histone H2b-616 [Mus musculus]                                                | 1744.8119 | 49.36  | 1.102064875 |
| 41054806 | AMGNLQIDFADPQR               | guanine nucleotide binding protein, alpha inhibiting 2 [Mus musculus]                               | 1575.764  | 40.5   | 0.95136484  |
| 6753320  | AMTGVQWQPYR                  | chaperonin subunit 3 (gamma) [Mus musculus]                                                         | 1337.6542 | 27.08  | 1.155931265 |
| 31981549 | ANIIFNTALGTIFGVK             | sulfide quinone reductase-like [Mus musculus]                                                       | 1678.9473 | 64.61  | 0.923422734 |
| 63746482 | ANLPQSFQVDTSK                | PREDICTED: filamin, alpha [Mus musculus]                                                            | 1434.7233 | 75.97  | 1.636384995 |
| 20137006 | ANLQIDQINTDLNLER             | myosin, heavy polypeptide 9, non-muscle [Mus musculus]                                              | 1869.964  | 58.58  | 1.057409574 |
| 19745150 | APDAWDYSQGFVNEEMIR           | diaphorase 1 [Mus musculus]                                                                         | 2127.9536 | 72.52  | 1.3547669   |
| 6754750  | APDFVYAPR                    | moesin [Mus musculus]                                                                               | 1182.6023 | 59     | 0.97851534  |
| 6677699  | APDFVYAPR                    | radixin [Mus musculus]                                                                              | 1182.6023 | 59     | 0.97851534  |
| 6678571  | APDFVYAPR                    | villin 2 [Mus musculus]                                                                             | 1182.6023 | 59     | 0.97851534  |
| 39204553 | APEPPPQQAQQQ                 | chromodomain helicase DNA binding protein 4 [Mus musculus]                                          | 1417.7013 | 86.52  | 1.052653888 |
| 6681157  | APILIATDVASR                 | DEAD (Asp-Glu-Ala-Asp) box polypeptide 5 [Mus musculus]                                             | 1226.7151 | 45.84  | 1.408898921 |
| 40068493 | APILIATDVASR                 | DEAD box polypeptide 17 isoform 1 [Mus musculus]                                                    | 1226.7151 | 45.84  | 1.408898921 |
| 63540743 | APLQVAVLGPTGVAEPVEVR         | PREDICTED: filamin C, gamma [Mus musculus]                                                          | 2002.1263 | 20.57  | 2.957618645 |
| 31560689 | APLVLEQQGLR                  | 3-hydroxy-3-methylglutaryl-Coenzyme A synthase 2 [Mus musculus]                                     | 1095.6569 | 37.72  | 1.743481499 |
| 38078825 | APPAAPAADEPGSPGGPPR          | PREDICTED: hypothetical protein LOC97130 [Mus musculus]                                             | 1711.8345 | 27.29  | 1.423665161 |
| 33859506 | APQVSTPLVEAAR                | albumin 1 [Mus musculus]                                                                            | 1439.7861 | 80.26  | 1.79399562  |
| 33563250 | APSYGAGELLDFSLADAVNQEFLATR   | desmin [Mus musculus]                                                                               | 2755.3572 | 30.69  | 2.08280331  |
| 6671664  | APVPTGEVYFADSFDR             | calnexin [Mus musculus]                                                                             | 1770.8427 | 75.05  | 0.636353164 |
| 41322904 | AQAEAQQPVFNTR                | plectin 1 isoform 1 [Mus musculus]                                                                  | 1572.8159 | 33.83  | 1.103164863 |
| 41322904 | AQAELEAQELQR                 | plectin 1 isoform 1 [Mus musculus]                                                                  | 1385.7068 | 48.18  | 1.122520903 |
| 31126968 | AQAPASPYNDYEGR               | retinoic acid induced 3 [Mus musculus]                                                              | 1538.6914 | 49.01  | 1.558818528 |
| 31982520 | AQDTAELFFEDVR                | acetyl-Coenzyme A dehydrogenase, long-chain [Mus musculus]                                          | 1540.7305 | 69.44  | 2.056403369 |
| 51828444 | AQEAAAEEPPPAVTPAASVSALDLGEQR | PREDICTED: proline-rich polypeptide 6 [Mus musculus]                                                | 2775.3779 | 44.95  | 0.986553215 |
| 6754256  | AQFEGIVTDLIK                 | heat shock protein 9A [Mus musculus]                                                                | 1333.735  | 55.16  | 2.952628751 |
| 29789289 | AQFGQPEILLGTIPGAGGTQR        | enoyl Coenzyme A hydratase, short chain, 1, mitochondrial [Mus musculus]                            | 2111.1301 | 83.96  | 1.402709261 |
| 6679583  | AQIWDTAGQER                  | RAB11B, member RAS oncogene family [Mus musculus]                                                   | 1274.6188 | 60.16  | 1.04915604  |
| 31560313 | AQLFALTGVQPAR                | ubiquitin specific protease 14 [Mus musculus]                                                       | 1371.7756 | 27.56  | 1.0565302   |
| 13385998 | AQLLQPTLEINPR                | TNF receptor-associated protein 1 [Mus musculus]                                                    | 1492.8557 | 33.95  | 0.825069812 |
| 6755404  | AQQEFAAGVFSNPAVR             | secretory carrier membrane protein 3 [Mus musculus]                                                 | 1691.8391 | 23.19  | 1.311156276 |
| 6679809  | AQQVAVQEIEIAR                | flotillin 1 [Mus musculus]                                                                          | 1469.7727 | 42.93  | 0           |
| 33468857 | AQVAQPGGDTIFGK               | histidine triad nucleotide binding protein 1 [Mus musculus]                                         | 1388.7103 | 53.98  | 0.838825735 |
| 41322904 | AQVEQELTTLR                  | plectin 1 isoform 1 [Mus musculus]                                                                  | 1287.6926 | 22.96  | 0           |
| 29244176 | AQYEDIANR                    | hypothetical protein 4732456N10 [Mus musculus]                                                      | 1079.5139 | 30.23  | 1.337810668 |
| 13624315 | AQYEDIANR                    | keratin complex 2, basic, gene 8 [Mus musculus]                                                     | 1079.5139 | 30.23  | 1.337810668 |
| 29789317 | AQYEDIANR                    | keratinocyte associated protein 1 [Mus musculus]                                                    | 1079.5139 | 30.23  | 1.337810668 |
| 2506774  | AQYEDIANR                    | Keratin, type II cytoskeletal 8 (Cytokeratin 8) (K8) (CK 8)                                         | 1079.5139 | 30.23  | 1.337810668 |
| 63565108 | AQYEDIANR                    | PREDICTED: similar to cytokeratin EndoA - mouse [Mus musculus]                                      | 1079.5139 | 30.23  | 1.337810668 |
| 21313536 | ASAFALQEQQPVVNAVIDATK        | dihydropolipoamide S-succinyltransferase (E2 component of 2-oxo-glutarate complex) [Mus musculus]   | 2187.1157 | 32.65  | 0           |
| 34328206 | ASEDFVDPWTVR                 | tryptophanyl-tRNA synthetase [Mus musculus]                                                         | 1421.6796 | 43.06  | 1.111108026 |
| 6755358  | ASGNATVISHNPETK              | ribosomal protein L8 [Mus musculus]                                                                 | 1688.8242 | 68.45  | 0.888798987 |
| 63746482 | ASGPGLNNTTGVSPASLPVEFTIDAK   | PREDICTED: filamin, alpha [Mus musculus]                                                            | 2342.2197 | 40.26  | 1.437003536 |
| 9845257  | ASGPPVSELITK                 | histone 1, H1c [Mus musculus]                                                                       | 1198.6619 | 83.86  | 0.847936298 |
| 34328365 | ASGPPVSELITK                 | histone 1, H1d [Mus musculus]                                                                       | 1198.6619 | 83.86  | 0.847936298 |
| 23943876 | ASGTSFNAVPLHPNTVLR           | zymogen granule membrane protein 16 [Mus musculus]                                                  | 1880.9989 | 48.89  | 0.801001486 |
| 13624315 | ASLEAAIADAEQR                | keratin complex 2, basic, gene 8 [Mus musculus]                                                     | 1344.6826 | 85.46  | 1.417062707 |
| 2506774  | ASLEAAIADAEQR                | Keratin, type II cytoskeletal 8 (Cytokeratin 8) (K8) (CK 8)                                         | 1344.6826 | 85.46  | 1.417062707 |
| 6679931  | ASLGLTNLADVPDDEVQGR          | UDP-N-acetyl-alpha-D-galactosamine: (N-acetylneuraminy)-galactosyl-N-acetylglucosaminylpolypeptid   | 2071.0293 | 28.52  | 0.451246881 |
| 31543605 | ASSFVLALEPELESR              | ribophorin I [Mus musculus]                                                                         | 1647.8639 | 55.74  | 0.824377883 |
| 38198665 | ASSSILINEAEPTTNIQIR          | p47 protein [Mus musculus]                                                                          | 2057.095  | 33.05  | 0           |
| 21313526 | ASTPDWPSQDPQGLQR             | hypothetical protein LOC78906 [Mus musculus]                                                        | 1879.9005 | 20.34  | 1.557949227 |
| 13385938 | ASVADPESPGGNEPAAASGQR        | RNA (guanine-7-) methyltransferase [Mus musculus]                                                   | 2151.9846 | 33.48  | 0.812742132 |
| 8567336  | ASVTALIESVNGK                | chloride channel calcium activated 3 [Mus musculus]                                                 | 1288.7087 | 63.75  | 3.470046073 |
| 6681143  | ASYSVSLYGNPVR                | decorin [Mus musculus]                                                                              | 1483.7544 | 20.12  | 0.965632052 |
| 9845283  | ASYVAPLTAQPATYR              | RNA binding motif protein 14 [Mus musculus]                                                         | 1608.8411 | 35.22  | 0           |

|          |                         |                                                                                                          |           |        |             |
|----------|-------------------------|----------------------------------------------------------------------------------------------------------|-----------|--------|-------------|
| 50080209 | ATAGDTHLGGEDFDNR        | heat shock protein 1A [Mus musculus]                                                                     | 1675.7338 | 103.26 | 0           |
| 7305163  | ATAGDTHLGGEDFDNR        | heat shock protein 1-like [Mus musculus]                                                                 | 1675.7338 | 103.26 | 0           |
| 6754976  | ATAVMPDGGFK             | peroxiredoxin 1 [Mus musculus]                                                                           | 1164.5743 | 61.25  | 1.154977606 |
| 6679567  | ATEMVEVGPEDDEVGAER      | polymerase I and transcript release factor [Mus musculus]                                                | 1932.8549 | 98.03  | 1.408901169 |
| 9845253  | ATENDIYNFFSPLNPMR       | heterogeneous nuclear ribonucleoprotein H2 [Mus musculus]                                                | 2028.9526 | 26.28  | 0           |
| 10946928 | ATENDIYNFFSPLNPVR       | heterogeneous nuclear ribonucleoprotein H1 [Mus musculus]                                                | 1996.9802 | 78.73  | 0.986842829 |
| 25020120 | ATGDPWLTDGSLYLDGSGFAR   | PREDICTED: laminin, alpha 5 [Mus musculus]                                                               | 2085.9578 | 21.68  | 0.723187439 |
| 7305295  | ATLQAEQLSNELATER        | myosin, heavy polypeptide 11, smooth muscle [Mus musculus]                                               | 1773.9083 | 74.82  | 1.989771382 |
| 6753492  | ATPEPSGTPSSDVTVSR       | coronin, actin binding protein 1A [Mus musculus]                                                         | 1588.7474 | 69.2   | 0.449657981 |
| 6753320  | AVAQALEVIPR             | chaperonin subunit 3 (gamma) [Mus musculus]                                                              | 1166.6952 | 23.87  | 0.765793338 |
| 22267442 | AVAQGNLSSADVQAAK        | ubiquinol cytochrome c reductase core protein 2 [Mus musculus]                                           | 1529.7863 | 121.44 | 1.442898429 |
| 6680748  | AVDSLVPIGR              | ATP synthase, H+ transporting, mitochondrial F1 complex, alpha subunit, isoform 1 [Mus musculus]         | 1026.5946 | 45.06  | 1.427547195 |
| 34610207 | AVFDETYDPVVR            | alanyl-tRNA synthetase [Mus musculus]                                                                    | 1408.6768 | 27.57  | 1.181286561 |
| 18079351 | AVFPQNLVVSSVDVQSVPEVDQR | major vault protein [Mus musculus]                                                                       | 2569.3125 | 56.52  | 1.407123907 |
| 21450277 | AVFQANQENLPIK           | Na+/K+ -ATPase alpha 1 subunit [Mus musculus]                                                            | 1584.8779 | 69.17  | 0.967416098 |
| 31981273 | AVFQYIDENQDR            | CNDP dipeptidase 2 (metallopeptidase M20 family) [Mus musculus]                                          | 1497.7035 | 26.95  | 0.766590631 |
| 6678467  | AVFVDLEPTVIDEIR         | tubulin, alpha 4 [Mus musculus]                                                                          | 1715.9216 | 63.09  | 1.542632944 |
| 6755901  | AVFVDLEPTVIDEVR         | tubulin, alpha 1 [Mus musculus]                                                                          | 1701.9152 | 95.4   | 1.168138401 |
| 34740335 | AVFVDLEPTVIDEVR         | tubulin, alpha 2 [Mus musculus]                                                                          | 1701.9152 | 95.4   | 1.168138401 |
| 6678469  | AVFVDLEPTVIDEVR         | tubulin, alpha 6 [Mus musculus]                                                                          | 1701.9152 | 95.4   | 1.168138401 |
| 30409988 | AVGESVQKPLDYR           | galactose-4-epimerase, UDP [Mus musculus]                                                                | 1624.8303 | 28.62  | 1.255409096 |
| 28916673 | AVITSLLDQIPEMFADTR      | SEC24 related gene family, member C [Mus musculus]                                                       | 2020.0367 | 45.67  | 0           |
| 22165384 | AVLVDLEPGTMDSVR         | tubulin, beta, 2 [Mus musculus]                                                                          | 1601.8234 | 57.18  | 1.27049937  |
| 31981939 | AVLVDLEPGTMDSVR         | tubulin, beta 4 [Mus musculus]                                                                           | 1601.8234 | 57.18  | 1.27049937  |
| 6755354  | AVPQLQGYLR              | ribosomal protein L6 [Mus musculus]                                                                      | 1144.6528 | 30.79  | 1.122278633 |
| 16716471 | AVPVSNIAPAAVGR          | hypothetical protein LOC94184 [Mus musculus]                                                             | 1321.7609 | 44.16  | 1.274122844 |
| 7305085  | AVQTLQMLQQMIMK          | glutamine fructose-6-phosphate transaminase 1 [Mus musculus]                                             | 1660.8654 | 55.99  | 0.936422956 |
| 6756039  | AVTEQGAELSNEER          | tyrosine 3-monooxygenase/tryptophan 5-monooxygenase activation protein, theta polypeptide [Mus musculus] | 1532.7179 | 68.29  | 0           |
| 14149750 | AWDDFFPGSDR             | ADP-ribosylation factor-like 6 interacting protein 5 [Mus musculus]                                      | 1312.5653 | 34.4   | 1.221016963 |
| 63746482 | AWGPGLEGGIVGK           | PREDICTED: filamin, alpha [Mus musculus]                                                                 | 1240.6661 | 63.34  | 1.059276172 |
| 7106381  | AYAQQLTEWAR             | protein kinase C and casein kinase substrate in neurons 2 [Mus musculus]                                 | 1336.6724 | 28.75  | 1.383845906 |
| 6753138  | AYGENIGYSEK             | Na+/K+ -ATPase beta 1 subunit [Mus musculus]                                                             | 1230.5645 | 72.55  | 1.118993691 |
| 63746482 | AYGPGIEPTGNMVK          | PREDICTED: filamin, alpha [Mus musculus]                                                                 | 1433.7043 | 42.2   | 1.29481841  |
| 33859482 | AYLPVNESFGFTADLR        | eukaryotic translation elongation factor 2 [Mus musculus]                                                | 1799.9008 | 81.38  | 0.915783189 |
| 6679491  | DADSIHQYLLQR            | aminopeptidase puromycin sensitive [Mus musculus]                                                        | 1458.7323 | 22.69  | 0           |
| 547749   | DAEAWFNEK               | Keratin, type I cytoskeletal 10 (Cytokeratin 10) (K10) (CK 10)                                           | 1109.4969 | 51.49  | 0.066400034 |
| 6755478  | DAEDAMDAMGAVLDGR        | splicing factor, arginine/serine-rich 2 [Mus musculus]                                                   | 1751.7365 | 66.59  | 0.721246995 |
| 6753484  | DAEEVISQTIIDTIVDMK      | procollagen, type VI, alpha 1 [Mus musculus]                                                             | 2036.0181 | 23.83  | 0           |
| 21450277 | DAFQNAYLELGGGLGER       | Na+/K+ -ATPase alpha 1 subunit [Mus musculus]                                                            | 1752.861  | 87.01  | 1.159112359 |
| 6754036  | DAGMQLQGYR              | glutamate oxaloacetate transaminase 2, mitochondrial [Mus musculus]                                      | 1138.5396 | 53.73  | 1.114815818 |
| 6754256  | DAGQISGLNVLR            | heat shock protein 9A [Mus musculus]                                                                     | 1242.6794 | 35.42  | 1.031915154 |
| 31981690 | DAGTIAGLNVLR            | heat shock protein 8 [Mus musculus]                                                                      | 1199.6782 | 72.31  | 0.809278797 |
| 63664182 | DAGTIAGLNVLR            | PREDICTED: similar to heat shock protein 8 [Mus musculus]                                                | 1199.6782 | 72.31  | 0.809278797 |
| 31981722 | DAGTIAGLNVMR            | heat shock 70kD protein 5 (glucose-regulated protein) [Mus musculus]                                     | 1217.6305 | 67.57  | 0.822952352 |
| 31543485 | DAHENGDVGAAGESPLDDTAAR  | golgi associated PDZ and coiled-coil motif containing [Mus musculus]                                     | 2167.9563 | 35.97  | 1.838095851 |
| 22203755 | DAHALLDIQSSGR           | eukaryotic translation initiation factor 3, subunit 8 [Mus musculus]                                     | 1496.7645 | 21.78  | 0           |
| 30424898 | DALVNAVIDSLSAYR         | SEC24 related gene family, member A [Mus musculus]                                                       | 1606.8459 | 42.29  | 0           |
| 31542602 | DANLYISGLPR             | ELAV (embryonic lethal, abnormal vision, Drosophila)-like 1 (Hu antigen R) [Mus musculus]                | 1218.6383 | 34.61  | 0           |
| 41322904 | DAPDGPVSEAEPEYTFEGLR    | plectin 1 isoform 1 [Mus musculus]                                                                       | 2179.0059 | 55.12  | 0.990307887 |
| 30348966 | DASVAEAWLLGQEPYLSR      | spectrin beta 2 isoform 1 [Mus musculus]                                                                 | 2092.0244 | 43.06  | 1.203222763 |
| 7106421  | DASVAEAWLLGQEPYLSR      | spectrin beta 2 isoform 2 [Mus musculus]                                                                 | 2092.0244 | 43.06  | 1.203222763 |
| 51770896 | DATNVGDEGGFAPNILENK     | PREDICTED: similar to Alpha enolase (2-phospho-D-glycerate hydro-lyase) (Non-neural enolase) (NNE)       | 1960.9319 | 76.63  | 1.110702868 |
| 31542333 | DAVITVPAFFNQAER         | hypoxia up-regulated 1 [Mus musculus]                                                                    | 1677.8645 | 30.64  | 1.200540654 |
| 31981562 | DAVLNAWAEDVDLR          | pyruvate kinase 3 [Mus musculus]                                                                         | 1586.7897 | 92.56  | 1.692435442 |
| 6755204  | DAYSGGAVNLYHVR          | proteasome (prosome, macropain) subunit, beta type 5 [Mus musculus]                                      | 1521.7524 | 26.95  | 0.952499249 |
| 56699423 | DDFLGQVDVPLVPLPTENPR    | neural precursor cell expressed, developmentally down-regulated gene 4 [Mus musculus]                    | 2285.1602 | 52.3   | 1.134646132 |
| 30519911 | DDGLFSGDPNWFPK          | transgelin 2 [Mus musculus]                                                                              | 1594.7314 | 39.17  | 0.814858564 |
| 6680027  | DDGSWEVIEGYR            | glutamate dehydrogenase 1 [Mus musculus]                                                                 | 1425.6372 | 63.61  | 1.101913667 |
| 31982122 | DDLIASILSEVTPPTLEELR    | phospholipase C, beta 3 [Mus musculus]                                                                   | 2211.1721 | 39.62  | 2.265765893 |
| 19072792 | DDTESLEIFQNEVAR         | thioredoxin domain containing 4 [Mus musculus]                                                           | 1765.8259 | 75.45  | 0.926498285 |

Oxidation (M)

|          |                           |                                                                                                     |           |        |             |
|----------|---------------------------|-----------------------------------------------------------------------------------------------------|-----------|--------|-------------|
| 6681027  | DDTYQSYSSPSR              | deleted in malignant brain tumors 1 [Mus musculus]                                                  | 1502.6439 | 43.6   | 1.600452611 |
| 21389320 | DESSDNFGSFFLR             | leucine-rich PPR motif-containing protein [Mus musculus]                                            | 1520.6819 | 40.1   | 1.150235824 |
| 31981100 | DESSPYAAMLAQDVAQR         | ribosomal protein S14 [Mus musculus]                                                                | 1922.8921 | 84.92  | 0.934445738 |
| 6680047  | DETNYGIPQR                | guanine nucleotide binding protein (G protein), beta polypeptide 2 like 1 [Mus musculus]            | 1192.5653 | 66.26  | 0.926502162 |
| 22203747 | DFDSLAAQPSFFDR            | procollagen, type VI, alpha 2 [Mus musculus]                                                        | 1544.7104 | 53.26  | 1.201964025 |
| 8393150  | DFEQPLAISR                | carboxyl terminal LIM domain protein 1 [Mus musculus]                                               | 1175.599  | 44.94  | 1.624255452 |
| 7305075  | DFFQNFNGVVELR             | ras-GTPase-activating protein SH3-domain binding protein [Mus musculus]                             | 1584.7831 | 45.21  | 0.946739234 |
| 21704100 | DFIYVSDQPK                | hydroxyacyl-Coenzyme A dehydrogenase/3-ketoacyl-Coenzyme A thiolase/enoyl-Coenzyme A hydratase (tri | 1211.5968 | 33.92  | 1.495794834 |
| 9790069  | DFLLKPELLR                | HLA-B-associated transcript 1A [Mus musculus]                                                       | 1243.7393 | 27.88  | 1.060259464 |
| 31981282 | DFLLQQTMLR                | glyoxalase 1 [Mus musculus]                                                                         | 1264.6722 | 41.09  | 1.573204816 |
| 6755142  | DFMIQGGDFTR               | peptidylprolyl isomerase B [Mus musculus]                                                           | 1286.5881 | 67.36  | 0.82795553  |
| 58037117 | DFPLTGYVELR               | NADH dehydrogenase (ubiquinone) Fe-S protein 3 [Mus musculus]                                       | 1309.6754 | 35.59  | 1.509211839 |
| 20137006 | DFSALESQQLDQTQLLQENR      | myosin, heavy polypeptide 9, non-muscle [Mus musculus]                                              | 2493.1711 | 96.88  | 0.894668399 |
| 6755714  | DFTDSQLQEGK               | transgelin [Mus musculus]                                                                           | 1267.5804 | 62.9   | 2.710827729 |
| 10181184 | DFTPSGIAGAFR              | ATP synthase, H+ transporting, mitochondrial F0 complex, subunit f, isoform 2 [Mus musculus]        | 1238.6223 | 29.74  | 1.28948867  |
| 6681233  | DGAFDFFPVLR               | solute carrier family 26 (sulfate transporter), member 2 [Mus musculus]                             | 1283.6426 | 26.82  | 1.512606775 |
| 33563250 | DGEVVSEATQQQHEVL          | desmin [Mus musculus]                                                                               | 1768.8326 | 94.47  | 2.002802469 |
| 22164798 | DGFNPAHVEAGLYGSR          | selenium binding protein 1 [Mus musculus]                                                           | 1689.8042 | 107.64 | 2.216161422 |
| 7657429  | DGHFTLFAPTNEAFEK          | osteoblast specific factor 2 (fasciilin I-like) [Mus musculus]                                      | 1823.8623 | 26.32  | 3.162783705 |
| 6680193  | DGIDDESIEAIFKPVMSK        | histone deacetylase 1 [Mus musculus]                                                                | 2043.9432 | 22.88  | 0           |
| 27754067 | DGMEYPFIGEGEPHVDGEPGDLR   | DnaJ (Hsp40) homolog, subfamily B, member 11 [Mus musculus]                                         | 2516.126  | 28.41  | 0.77907318  |
| 22779879 | DGNGQITDKPVQQAQVQIR       | desmoglein 2 [Mus musculus]                                                                         | 2095.0955 | 47.83  | 0.997403923 |
| 63471580 | DGPLNMILDDGGDLTNLIHTK     | PREDICTED: similar to S-adenosylhomocysteine hydrolase [Mus musculus]                               | 2252.1121 | 36.69  | 0           |
| 21450277 | DGPNALTPPTTPEWVK          | Na+/K+-ATPase alpha 1 subunit [Mus musculus]                                                        | 1819.9224 | 46.9   | 1.25631784  |
| 6680047  | DGQAMLWDLNEGK             | guanine nucleotide binding protein (G protein), beta polypeptide 2 like 1 [Mus musculus]            | 1476.6859 | 68.51  | 1.043152571 |
| 27229048 | DGQVIGIGAGQQSR            | 5-aminoimidazole-4-carboxamide ribonucleotide formyltransferase/IMP cyclohydrolase [Mus musculus]   | 1385.71   | 62.92  | 0.75477319  |
| 31982755 | DGQVINETSQHHDDLE          | vimentin [Mus musculus]                                                                             | 1836.7985 | 77.9   | 1.289652709 |
| 34328400 | DGTGVVEFVR                | splicing factor, arginine/serine-rich 1 (ASF/SF2) [Mus musculus]                                    | 1078.5582 | 39.27  | 0.302098764 |
| 45597447 | DGVANVSIEDR               | superoxide dismutase 1, soluble [Mus musculus]                                                      | 1174.5728 | 66.78  | 1.230317168 |
| 18079339 | DGYAQILR                  | aconitase 2, mitochondrial [Mus musculus]                                                           | 935.4994  | 32.67  | 1.329469952 |
| 34328400 | DGYDYDGYR                 | splicing factor, arginine/serine-rich 1 (ASF/SF2) [Mus musculus]                                    | 1123.4355 | 24.61  | 1.072491323 |
| 6680117  | DGYMPSQYNSQONWEAR         | glutathione synthetase [Mus musculus]                                                               | 1945.8195 | 40.22  | 1.162509354 |
| 13384736 | DHLYGTLDPNTR              | dynein, cytoplasmic, heavy chain 1 [Mus musculus]                                                   | 1401.6785 | 25.75  | 0           |
| 22203747 | DIANSPHELYR               | procollagen, type VI, alpha 2 [Mus musculus]                                                        | 1314.6379 | 45.87  | 0.623838007 |
| 51890205 | DIFAMDDKSENEPIENEAR       | succinate-Coenzyme A ligase, GDP-forming, beta subunit [Mus musculus]                               | 2294.0432 | 59.09  | 0.833637088 |
| 58037564 | DIFPIAFPR                 | protease, serine, 15 [Mus musculus]                                                                 | 1075.6018 | 30.94  | 1.172036705 |
| 27370516 | DIFQEIFDK                 | isocitrate dehydrogenase 2 (NADP+), mitochondrial [Mus musculus]                                    | 1154.5803 | 29.89  | 2.088612327 |
| 40254595 | DIGAIAQVHAENGDIIEEQQR     | dihydropyrimidinase-like 2 [Mus musculus]                                                           | 2377.1877 | 65.28  | 0.771701402 |
| 7305445  | DILIQYDR                  | ribosomal protein S16 [Mus musculus]                                                                | 1035.548  | 41.37  | 1.331082474 |
| 6671549  | DINAYNGETPTEK             | peroxiredoxin 6 [Mus musculus]                                                                      | 1452.6628 | 50.29  | 2.024318003 |
| 6753374  | DINDNAPVFNSTYQGGVQVENEVNR | cadherin 1 [Mus musculus]                                                                           | 2888.3315 | 113.09 | 1.186163625 |
| 9790073  | DINDNRPTFLQSK             | cadherin 17 [Mus musculus]                                                                          | 1547.7938 | 20.61  | 1.230808464 |
| 18079339 | DINQEVYNFLATAGAK          | aconitase 2, mitochondrial [Mus musculus]                                                           | 1753.8756 | 82.26  | 0.965488279 |
| 31543605 | DIPAYSQDTFK               | ribophorin I [Mus musculus]                                                                         | 1284.6217 | 20.87  | 0           |
| 6677809  | DIPGLTDTTVPR              | ribosomal protein S6 [Mus musculus]                                                                 | 1284.679  | 42     | 1.492468518 |
| 6680283  | DIQENYGGDYVHTQK           | hydroxysteroid (17-beta) dehydrogenase 2 [Mus musculus]                                             | 1837.8431 | 49.08  | 1.139082    |
| 6680159  | DIQLAR                    | H3 histone, family 3A [Mus musculus]                                                                | 715.416   | 25.2   | 0.600295943 |
| 6755863  | DISTNYYASQK               | tumor rejection antigen gp96 [Mus musculus]                                                         | 1289.6031 | 90     | 0.775839227 |
| 23956222 | DITYFIQQLLR               | ARP3 actin-related protein 3 homolog [Mus musculus]                                                 | 1409.7874 | 58     | 1.304102972 |
| 6755787  | DIVENYFMR                 | tripartite motif protein 28 [Mus musculus]                                                          | 1186.5662 | 29.77  | 0.938961157 |
| 22267440 | DIVEVLFQPNVELNQQNK        | SH3 domain protein 3 [Mus musculus]                                                                 | 2228.1135 | 21.96  | 1.45616753  |
| 19882201 | DKTPVQSQQSATTTPSGADEK     | proteasome 26S non-ATPase subunit 2 [Mus musculus]                                                  | 2172.0454 | 88.39  | 1.057741813 |
| 6754524  | DLADELALVDVMDK            | lactate dehydrogenase 1, A chain [Mus musculus]                                                     | 1675.8113 | 98.84  | 1.551034344 |
| 63746482 | DLAEDAPWK                 | PREDICTED: filamin, alpha [Mus musculus]                                                            | 1044.5023 | 35     | 0           |
| 63660294 | DLAEDAPWK                 | PREDICTED: similar to Filamin B (FLN-B) (Beta-filamin) (Actin-binding like protein) (ABP-280-like p | 1044.5023 | 35     | 0           |
| 30348966 | DLDDFQSWLSR               | spectrin beta 2 isoform 1 [Mus musculus]                                                            | 1381.6544 | 24.23  | 1.17482555  |
| 7106421  | DLDDFQSWLSR               | spectrin beta 2 isoform 2 [Mus musculus]                                                            | 1381.6544 | 24.23  | 1.17482555  |
| 27370092 | DLDKPFLLPVESVYSIPGR       | Tu translation elongation factor, mitochondrial [Mus musculus]                                      | 2145.1543 | 38.53  | 1.180171347 |
| 6755809  | DLDQASLAASVQLAPR          | talin 1 [Mus musculus]                                                                              | 1782.9409 | 40.69  | 0           |
| 45598381 | DLDSLHSFVLR               | thioredoxin domain containing 5 [Mus musculus]                                                      | 1301.6962 | 49.65  | 0.941787274 |

Deamidation (NQ)

|          |                            |                    |                                                                                                  |           |        |             |
|----------|----------------------------|--------------------|--------------------------------------------------------------------------------------------------|-----------|--------|-------------|
| 6753658  | DLEDKEGEIQAGAK             |                    | dynein, cytoplasmic, intermediate chain 2 [Mus musculus]                                         | 1502.7268 | 31.48  | 0           |
| 10946574 | DLFDPIIEER                 |                    | creatine kinase, brain [Mus musculus]                                                            | 1246.6406 | 47.9   | 1.787853804 |
| 13242328 | DLFEDELVPLFEK              |                    | NS1-associated protein 1 [Mus musculus]                                                          | 1593.8081 | 31.06  | 0           |
| 6679687  | DLFSDGHSEFLK               |                    | glucose regulated protein [Mus musculus]                                                         | 1394.6644 | 69.09  | 0.90674792  |
| 25020120 | DLGAQGAVAEAEAEAR           |                    | PREDICTED: laminin, alpha 5 [Mus musculus]                                                       | 1798.8816 | 60.2   | 0.759051603 |
| 27532959 | DLGEAALNEYLR               |                    | aldehyde dehydrogenase 1 family, member L1 [Mus musculus]                                        | 1363.6869 | 29.55  | 2.625994493 |
| 29336026 | DLGEELEALR                 |                    | nonmuscle myosin heavy chain [Mus musculus]                                                      | 1144.5807 | 32.17  | 0           |
| 31541890 | DLGQVAAQEAEER              |                    | hypothetical protein LOC67873 [Mus musculus]                                                     | 1286.6384 | 20.33  | 0           |
| 56119103 | DLGTDSQIFISR               |                    | guanosine diphosphate (GDP) dissociation inhibitor 3 [Mus musculus]                              | 1351.6929 | 68.64  | 1.729088677 |
| 38198665 | DLIHDQDEEEEEEGQR           |                    | p47 protein [Mus musculus]                                                                       | 2099.8711 | 69.69  | 0.932374069 |
| 22507357 | DLKPSNILYVDESGNPESIR       |                    | ribosomal protein S6 kinase polypeptide 3 [Mus musculus]                                         | 2246.1116 | 34.02  | 0           |
| 59709449 | DLLLDPAWEK                 |                    | actinin alpha 2 [Mus musculus]                                                                   | 1199.6321 | 54.22  | 1.2206527   |
| 11230802 | DLLLDPAWEK                 |                    | actinin alpha 4 [Mus musculus]                                                                   | 1199.6321 | 54.22  | 1.2206527   |
| 6679687  | DLLTAYYDVVYEK              |                    | glucose regulated protein [Mus musculus]                                                         | 1607.7505 | 46.07  | 0           |
| 7657429  | DLLTQPGDWTLFAPTNDAFK       |                    | osteoblast specific factor 2 (fasciclin I-like) [Mus musculus]                                   | 2250.0945 | 26.96  | 1.833317904 |
| 6681233  | DLPEEAFGFPSELPLETQR        |                    | solute carrier family 26 (sulfate transporter), member 2 [Mus musculus]                          | 2175.0608 | 30.41  | 2.003103798 |
| 47578123 | DLQLVLPDYFFPER             |                    | potassium channel tetramerisation domain containing 12 [Mus musculus]                            | 1604.835  | 59.22  | 0.711302871 |
| 6671507  | DLTDYLMK                   |                    | actin, alpha 2, smooth muscle, aorta [Mus musculus]                                              | 998.495   | 52.66  | 1.155332405 |
| 6671509  | DLTDYLMK                   |                    | actin, beta, cytoplasmic [Mus musculus]                                                          | 998.495   | 52.66  | 1.155332405 |
| 30425250 | DLTDYLMK                   |                    | hypothetical protein LOC238880 [Mus musculus]                                                    | 998.495   | 52.66  | 1.155332405 |
| 63652452 | DLTDYLMK                   |                    | PREDICTED: similar to cytoplasmic beta-actin [Mus musculus]                                      | 998.495   | 52.66  | 1.155332405 |
| 58037465 | DLTTAGAVTQCYSR             |                    | Ribosomal protein L18A [Mus musculus]                                                            | 1398.672  | 36.93  | 1.871362486 |
| 34328286 | DLVPDLSNFYQYK              |                    | succinate dehydrogenase Ip subunit [Mus musculus]                                                | 1672.8094 | 37.99  | 0.526291338 |
| 29293809 | DLVSSLTSGLLTIGDR           |                    | ATP citrate lyase [Mus musculus]                                                                 | 1646.8967 | 52.01  | 1.563117878 |
| 6671507  | DLYANNVLSGGTTMYPGIADR      |                    | actin, alpha 2, smooth muscle, aorta [Mus musculus]                                              | 2228.0762 | 146.86 | 1.07961248  |
| 6671507  | DLYANNVLSGGTTMYPGIADR      | 2 Deamidation (NQ) | actin, alpha 2, smooth muscle, aorta [Mus musculus]                                              | 2230.0679 | 20.46  | 0           |
| 6671507  | DLYANNVLSGGTTMYPGIADR      | Deamidation (NQ)   | actin, alpha 2, smooth muscle, aorta [Mus musculus]                                              | 2229.0566 | 141.17 | 0           |
| 6671507  | DLYANNVLSGGTTMYPGIADR      | Oxidation (M)      | actin, alpha 2, smooth muscle, aorta [Mus musculus]                                              | 2244.0649 | 46.62  | 0.883665116 |
| 6671509  | DLYANTVLSGGTTMYPGIADR      |                    | actin, beta, cytoplasmic [Mus musculus]                                                          | 2215.075  | 157.93 | 0.98840993  |
| 63652452 | DLYANTVLSGGTTMYPGIADR      |                    | PREDICTED: similar to cytoplasmic beta-actin [Mus musculus]                                      | 2215.075  | 157.93 | 0.98840993  |
| 6671509  | DLYANTVLSGGTTMYPGIADR      | Deamidation (NQ)   | actin, beta, cytoplasmic [Mus musculus]                                                          | 2216.0381 | 27.97  | 0           |
| 63652452 | DLYANTVLSGGTTMYPGIADR      | Deamidation (NQ)   | PREDICTED: similar to cytoplasmic beta-actin [Mus musculus]                                      | 2216.0381 | 27.97  | 0           |
| 6671509  | DLYANTVLSGGTTMYPGIADR      | Oxidation (M)      | actin, beta, cytoplasmic [Mus musculus]                                                          | 2231.0684 | 28     | 1.069182793 |
| 63652452 | DLYANTVLSGGTTMYPGIADR      | Oxidation (M)      | PREDICTED: similar to cytoplasmic beta-actin [Mus musculus]                                      | 2231.0684 | 28     | 1.069182793 |
| 29126205 | DMDLIDVNEAFAPQFLSVQK       |                    | acetyl-Coenzyme A acyltransferase 2 (mitochondrial 3-oxoacyl-Coenzyme A thiolase) [Mus musculus] | 2280.1055 | 25.55  | 1.976804017 |
| 20137006 | DMFQETMEAMR                |                    | myosin, heavy polypeptide 9, non-muscle [Mus musculus]                                           | 1388.5724 | 44.36  | 0.875237155 |
| 6677799  | DMILPEMVGSMGVYNGK          |                    | ribosomal protein S15 [Mus musculus]                                                             | 2053.0278 | 51.72  | 0           |
| 6755626  | DMLYQVLAEEPSVR             |                    | sepiapterin reductase [Mus musculus]                                                             | 1720.8628 | 48.27  | 1.274906424 |
| 21450277 | DMTSEELDDLIR               |                    | Na+/K+ -ATPase alpha 1 subunit [Mus musculus]                                                    | 1436.6635 | 88.26  | 1.468187913 |
| 8567336  | DMVTQASPYLFEATGK           |                    | chloride channel calcium activated 3 [Mus musculus]                                              | 1757.856  | 70.28  | 0           |
| 8567336  | DMVTQASPYLFEATGK           | Oxidation (M)      | chloride channel calcium activated 3 [Mus musculus]                                              | 1773.8336 | 53.7   | 0           |
| 6681219  | DNFTAIEPGTNGVEER           |                    | dihydropyrimidinase-like 3 [Mus musculus]                                                        | 1748.8153 | 56.05  | 6.127227352 |
| 40254595 | DNFTLIPEGTNGTEER           |                    | dihydropyrimidinase-like 2 [Mus musculus]                                                        | 1792.8151 | 50.69  | 0.728424765 |
| 21361209 | DNIQGITKPAIR               |                    | germinal histone H4 [Mus musculus]                                                               | 1325.7603 | 71.03  | 0.533154956 |
| 31982755 | DNLAEDIMR                  |                    | vimentin [Mus musculus]                                                                          | 1076.5129 | 32.54  | 1.442691217 |
| 29789080 | DNNQFASASLDR               |                    | coatamer protein complex, subunit beta 2 (beta prime) [Mus musculus]                             | 1337.6106 | 82.74  | 1.102336876 |
| 23621467 | DNTINLIHTFR                |                    | PREDICTED: actin related protein 2/3 complex, subunit 2 [Mus musculus]                           | 1343.7188 | 33.94  | 1.124202158 |
| 34328278 | DNVDDPTGNFR                |                    | lectin, mannose-binding 2 [Mus musculus]                                                         | 1249.5459 | 44.63  | 0           |
| 6679891  | DPAEGNGAQPEATPGDGDKPEETQEK |                    | alpha glucosidase 2 alpha neutral subunit [Mus musculus]                                         | 2667.1724 | 56.49  | 0.973162809 |
| 6679891  | DPAEGNGAQPEATPGDGDKPEETQEK | Deamidation (NQ)   | alpha glucosidase 2 alpha neutral subunit [Mus musculus]                                         | 2668.1582 | 78.22  | 0.943315568 |
| 6680836  | DPDAAKPEDWDER              |                    | calreticulin [Mus musculus]                                                                      | 1543.6686 | 61.27  | 0           |
| 28916693 | DPDQTDGPGGLGYSLSHIANVER    |                    | gelsolin [Mus musculus]                                                                          | 2341.1094 | 59.1   | 1.294670215 |
| 31981826 | DPEAIFQVADYGVADLFK         |                    | electron transferring flavoprotein, alpha polypeptide [Mus musculus]                             | 2208.1287 | 36.13  | 1.841921736 |
| 31543942 | DPNASPGDAGEQAIR            |                    | vinculin [Mus musculus]                                                                          | 1497.6946 | 87.71  | 1.146215696 |
| 31980794 | DPTSLLFPESELSIR            |                    | solute carrier family 39 (metal ion transporter), member 11 [Mus musculus]                       | 1703.8811 | 40.21  | 1.379466749 |
| 63589703 | DPVQLNLLYVQAR              |                    | PREDICTED: talin 2 [Mus musculus]                                                                | 1528.851  | 54.13  | 0           |
| 6755809  | DPVQLNLLYVQAR              |                    | talin 1 [Mus musculus]                                                                           | 1528.851  | 54.13  | 0           |
| 51768600 | DQAPSEAEELER               |                    | PREDICTED: LIM domain only 7 [Mus musculus]                                                      | 1244.5771 | 26.16  | 0.907555397 |
| 63481281 | DQDVPEGAPSMGAK             |                    | PREDICTED: glutamyl-prolyl-tRNA synthetase [Mus musculus]                                        | 1401.637  | 54.15  | 1.492001012 |
| 31980648 | DQEGQDVLFFIDNIFR           |                    | ATP synthase, H+ transporting mitochondrial F1 complex, beta subunit [Mus musculus]              | 1921.9718 | 88.26  | 1.237585222 |



|          |                          |                                                                                                     |           |        |             |
|----------|--------------------------|-----------------------------------------------------------------------------------------------------|-----------|--------|-------------|
| 30520375 | DQEQLQAWESEGLSQISQNK     | UDP-N-acteylglucosamine pyrophosphorylase 1 homolog [Mus musculus]                                  | 2318.0901 | 66.35  | 1.215294019 |
| 33620739 | DQGTYYEDYVEGLR           | myosin, light polypeptide 6, alkali, smooth muscle and non-muscle [Mus musculus]                    | 1544.697  | 33.3   | 1.554395706 |
| 6754556  | DQMQQQLSDYEQLLDVK        | lamin B1 [Mus musculus]                                                                             | 2080.9922 | 68.67  | 0.868280427 |
| 6754556  | DQMQQQLSDYEQLLDVK        | lamin B1 [Mus musculus]                                                                             | 2081.9871 | 21.84  | 0           |
| 6753824  | DQPFTILYR                | fibulin 5 [Mus musculus]                                                                            | 1152.6025 | 21.46  | 1.404420112 |
| 63492693 | DQSQWENASENAER           | PREDICTED: activity-dependent neuroprotective protein [Mus musculus]                                | 1663.7134 | 28.7   | 0.985902049 |
| 6754254  | DQVANSAFVER              | heat shock protein 1, alpha [Mus musculus]                                                          | 1235.6002 | 64.78  | 1.880171559 |
| 63481281 | DQVDSAVQELLQLK           | PREDICTED: glutamyl-prolyl-tRNA synthetase [Mus musculus]                                           | 1585.8265 | 54.71  | 0           |
| 31982122 | DREDEEEDEEEETDPK         | phospholipase C, beta 3 [Mus musculus]                                                              | 2223.8606 | 30.24  | 1.635621938 |
| 23956222 | DREVGIPPEQSLETA          | ARP3 actin-related protein 3 homolog [Mus musculus]                                                 | 1768.9071 | 24.94  | 0.758486958 |
| 6679058  | DSGGQFTDEFLEPEQR         | nidogen 2 [Mus musculus]                                                                            | 1668.7494 | 41.36  | 0           |
| 33859811 | DSIFSNLIGQLDYK           | hydroxyacyl-Coenzyme A dehydrogenase/3-ketoacyl-Coenzyme A thiolase/enoyl-Coenzyme A hydratase (tri | 1612.8143 | 61.3   | 1.264800573 |
| 6753266  | DSISLSPEQLAQLR           | carbonic anhydrase 1 [Mus musculus]                                                                 | 1556.8363 | 81.98  | 2.772666637 |
| 6755040  | DSLLQDGEFTMDLR           | profilin 1 [Mus musculus]                                                                           | 1639.7633 | 41.4   | 1.058358448 |
| 31543976 | DSTLIMQLLR               | 3-monooxygenase/tryptophan 5-monooxygenase activation protein, gamma polypeptide [Mus musculus]     | 1189.6639 | 51.59  | 1.063988304 |
| 31543974 | DSTLIMQLLR               | tyrosine 3-monooxygenase/tryptophan 5-monooxygenase activation protein, beta polypeptide [Mus muscu | 1189.6639 | 51.59  | 1.063988304 |
| 31981925 | DSTLIMQLLR               | tyrosine 3-monooxygenase/tryptophan 5-monooxygenase activation protein, epsilon polypeptide [Mus mu | 1189.6639 | 51.59  | 1.063988304 |
| 6756039  | DSTLIMQLLR               | tyrosine 3-monooxygenase/tryptophan 5-monooxygenase activation protein, theta polypeptide [Mus musc | 1189.6639 | 51.59  | 1.063988304 |
| 6756041  | DSTLIMQLLR               | tyrosine 3-monooxygenase/tryptophan 5-monooxygenase activation protein, zeta polypeptide [Mus muscu | 1189.6639 | 51.59  | 1.063988304 |
| 6753514  | DSTQTPAIPQSQPAATDSSVSVQK | carnitine palmitoyltransferase 2 [Mus musculus]                                                     | 2514.2209 | 58.81  | 1.663987042 |
| 6671507  | DSYVGDEAQS               | actin, alpha 2, smooth muscle, aorta [Mus musculus]                                                 | 1198.519  | 74.77  | 0.94564111  |
| 6671509  | DSYVGDEAQS               | actin, beta, cytoplasmic [Mus musculus]                                                             | 1198.519  | 74.77  | 0.94564111  |
| 6753374  | DTANWLEINPETGAIFTR       | cadherin 1 [Mus musculus]                                                                           | 2048.0151 | 52.49  | 1.332611298 |
| 41322904 | DTHDQLSEPSVFR            | plectin 1 isoform 1 [Mus musculus]                                                                  | 1512.697  | 58.01  | 0.706560938 |
| 9790067  | DTNGENIAESLVAEGLATR      | staphylococcal nuclease domain containing 1 [Mus musculus]                                          | 1959.9624 | 72.15  | 0.790441856 |
| 6755142  | DTNGSQFFITTVK            | peptidylprolyl isomerase B [Mus musculus]                                                           | 1457.7305 | 71.91  | 0.925205768 |
| 6680163  | DTPGFVNR                 | L-3-hydroxyacyl-Coenzyme A dehydrogenase, short chain [Mus musculus]                                | 1018.5351 | 32.06  | 1.365302875 |
| 42476274 | DTPTQEDWLVSVLPEGSR       | X-prolyl aminopeptidase (aminopeptidase P) 1, soluble [Mus musculus]                                | 2028.9852 | 26.15  | 1.425595456 |
| 7305295  | DVASLGSQQLDTEQLLEETR     | myosin, heavy polypeptide 11, smooth muscle [Mus musculus]                                          | 2360.1572 | 134.21 | 1.461276272 |
| 63746482 | DVDIIDHHDNTYTVK          | PREDICTED: filamin, alpha [Mus musculus]                                                            | 1784.8452 | 87.29  | 1.354179275 |
| 27804325 | DVPALEITHFLER            | monoamine oxidase A [Mus musculus]                                                                  | 1640.863  | 40.26  | 1.568213019 |
| 7304885  | DVQELYAAGENR             | annexin A11 [Mus musculus]                                                                          | 1364.6366 | 21.39  | 0           |
| 27229048 | DVSELTGFPEMLGGR          | 5-aminoimidazole-4-carboxamide ribonucleotide formyltransferase/IMP cyclohydrolase [Mus musculus]   | 1607.7791 | 62.04  | 1.175654751 |
| 28173550 | DVTNNVHYENYR             | cell division cycle 10 homolog [Mus musculus]                                                       | 1523.6913 | 81.43  | 0.897955889 |
| 24429590 | DVVLAYPEVR               | DEAH (Asp-Glu-Ala-His) box polypeptide 9 [Mus musculus]                                             | 1160.6208 | 38.5   | 3.013730589 |
| 20532346 | DVYEDELVPVFETVGR         | hypothetical protein LOC245945 [Mus musculus]                                                       | 1866.9204 | 83.93  | 1.118279888 |
| 51467513 | DXSHYFKTIQDLR            | PREDICTED: similar to Keratin, type I cytoskeletal 18 (Cytokeratin 18) (K18) (CK 18) [Homo sapiens] | 1708.8521 | 34.45  | 0           |
| 7948999  | DYGVYLEDGHTLR            | peroxiredoxin 4 [Mus musculus]                                                                      | 1624.757  | 36.49  | 0.760694188 |
| 13385942 | DYIWNTLNSGR              | citrate synthase [Mus musculus]                                                                     | 1338.6488 | 51.42  | 1.599516839 |
| 7304887  | DYPGFSPSVDAAIR           | annexin A3 [Mus musculus]                                                                           | 1623.7742 | 64.48  | 1.37578887  |
| 7242187  | DYTGEDVTPENFLAVLR        | legumain [Mus musculus]                                                                             | 1938.9392 | 24.1   | 1.468580775 |
| 14149756 | DYTYEELLNR               | eukaryotic translation initiation factor 2, subunit 2 (beta) [Mus musculus]                         | 1315.6234 | 39.6   | 1.14559348  |
| 6671684  | EAAEAIEAEGATAPLLELLHR    | catenin beta [Mus musculus]                                                                         | 2279.1472 | 42.33  | 1.08941866  |
| 6755809  | EAAFHPEVAPDVR            | talin 1 [Mus musculus]                                                                              | 1437.7163 | 41.02  | 0           |
| 6753086  | EAGGEPVLYEDPPDQK         | apurinic/apyrimidinic endonuclease 1 [Mus musculus]                                                 | 1814.8459 | 21.29  | 0           |
| 31982722 | EAAGTTAAAGTGGTTEQPPR     | squamous cell carcinoma antigen recognized by T-cells 1 [Mus musculus]                              | 1843.8787 | 54.89  | 1.125953782 |
| 63664073 | EAAPDTGAEPSPEDSDPTYSSK   | PREDICTED: p30 DBC protein [Mus musculus]                                                           | 2250.9453 | 51.08  | 1.546173842 |
| 31982290 | EAAAYAPPASGNQNHGMPYVSGPK | LIM domain containing preferred translocation partner in lipoma [Mus musculus]                      | 2440.1416 | 35.92  | 0           |
| 42415475 | EADDIVNWLK               | prolyl 4-hydroxylase, beta polypeptide [Mus musculus]                                               | 1202.6127 | 75.4   | 1.479049512 |
| 15426055 | EAEELLEPLMPAIR           | coatamer protein complex, subunit beta 1 [Mus musculus]                                             | 1481.8096 | 35.53  | 0.962704833 |
| 47578123 | EAEYFELPELVR             | potassium channel tetramerisation domain containing 12 [Mus musculus]                               | 1494.7589 | 26.45  | 0.697487595 |
| 6755911  | EAFQEALAAAGDK            | thioredoxin 1 [Mus musculus]                                                                        | 1320.6354 | 60.31  | 2.046617399 |
| 58696420 | EAFTHDHEEFAGR            | cytochrome P450, family 2, subfamily c, polypeptide 65 [Mus musculus]                               | 1465.6398 | 51.01  | 1.462249438 |
| 6679599  | EAINVEQAFQTIAR           | RAB7, member RAS oncogene family [Mus musculus]                                                     | 1589.8263 | 41.1   | 1.364292427 |
| 21311915 | EALGGQAEFFSGR            | cytochrome P450, family 2, subfamily s, polypeptide 1 [Mus musculus]                                | 1350.6401 | 22.96  | 0           |
| 30409988 | EALNVFGDDYATEDGTGVR      | galactose-4-epimerase, UDP [Mus musculus]                                                           | 2028.9222 | 79.95  | 1.358532622 |
| 15808988 | EALTYDGALLGDR            | Williams-Beuren syndrome chromosome region 1 homolog [Mus musculus]                                 | 1393.6969 | 50.87  | 0           |
| 31981515 | EANNFLWPFK               | ribosomal protein L7 [Mus musculus]                                                                 | 1265.6355 | 38.19  | 1.087962239 |
| 29336026 | EAQAGLAEAQEDLEAER        | nonmuscle myosin heavy chain [Mus musculus]                                                         | 1829.8513 | 72.25  | 1.474102962 |
| 7305395  | EAQIFYDNEIPNFPQSTVQGHAGR | purine-nucleoside phosphorylase [Mus musculus]                                                      | 2718.3008 | 20.34  | 1.150558522 |

|          |                          |                                                                                                     |           |        |             |
|----------|--------------------------|-----------------------------------------------------------------------------------------------------|-----------|--------|-------------|
| 6679687  | EATNPPIIQEEKPK           | glucose regulated protein [Mus musculus]                                                            | 1593.8495 | 79.69  | 0.895203586 |
| 23956084 | EATQAVLDKPELSSDASTR      | acyl-Coenzyme A dehydrogenase, very long chain [Mus musculus]                                       | 2119.0552 | 80.23  | 1.85810724  |
| 63746482 | EATTEFSVDAR              | PREDICTED: filamin, alpha [Mus musculus]                                                            | 1225.5729 | 70.1   | 1.51462512  |
| 12963539 | EAVLIDPVLETahr           | ETHE1 protein [Mus musculus]                                                                        | 1562.8553 | 32.63  | 1.061844417 |
| 6680748  | EAYPGDVFYLHSR            | ATP synthase, H+ transporting, mitochondrial F1 complex, alpha subunit, isoform 1 [Mus musculus]    | 1553.7428 | 55.47  | 1.898616184 |
| 63562740 | EDALMVELDSR              | PREDICTED: similar to secreted gel-forming mucin [Mus musculus]                                     | 1277.6124 | 65.31  | 0.703074421 |
| 46575903 | EDAPVGPLHQLQSMPEQIR      | eukaryotic translation initiation factor 3, subunit 10 (theta) [Mus musculus]                       | 1990.963  | 46.64  | 0.911576275 |
| 6756033  | EDGNEEDKENQGGDETTQQQPPQR | nuclease sensitive element binding protein 1 [Mus musculus]                                         | 2628.1023 | 121.94 | 0.860919865 |
| 7710014  | EDGSEVGVGGAAQVTGSNTR     | cullin 3 [Mus musculus]                                                                             | 1819.8501 | 36.32  | 1.254029264 |
| 20330802 | EDLIWEILK                | transferrin [Mus musculus]                                                                          | 1158.6411 | 23.94  | 1.126217264 |
| 33859482 | EDLYLKPQIR               | eukaryotic translation elongation factor 2 [Mus musculus]                                           | 1274.7103 | 29.36  | 0.925286433 |
| 6754254  | EDQTEYLEER               | heat shock protein 1, alpha [Mus musculus]                                                          | 1311.5714 | 68.47  | 1.200223906 |
| 40556608 | EDQTEYLEER               | heat shock protein 1, beta [Mus musculus]                                                           | 1311.5714 | 68.47  | 1.200223906 |
| 51768600 | EDSVVAETQLASHSPPEQR      | PREDICTED: LIM domain only 7 [Mus musculus]                                                         | 2111.9863 | 49.67  | 1.317127729 |
| 31982755 | EEAESTLQSF               | vimentin [Mus musculus]                                                                             | 1296.6118 | 65.6   | 0.993721432 |
| 9790247  | EEAGGGGGGGISEEEEEAAQYDR  | ubiquitin-like 1 (sentrin) activating enzyme subunit 1 [Mus musculus]                               | 2038.8582 | 59.25  | 1.085381622 |
| 6755863  | EEEEIQLDGLNASQIR         | tumor rejection antigen gp96 [Mus musculus]                                                         | 1785.9004 | 96.27  | 1.062756235 |
| 30425112 | EEEEEEEEYEDEGSNLKR       | hypothetical protein LOC109154 [Mus musculus]                                                       | 2113.8804 | 56.18  | 1.137534611 |
| 22208854 | EEGYDSVFSVVR             | cytidine monophospho-N-acetylneuraminic acid synthetase [Mus musculus]                              | 1386.6593 | 41     | 1.148642967 |
| 6753036  | EEIFGPVMQILK             | aldehyde dehydrogenase 2, mitochondrial [Mus musculus]                                              | 1403.7655 | 52.62  | 1.179280404 |
| 21312260 | EEIFGPVQPLFK             | aldehyde dehydrogenase 1 family, member B1 [Mus musculus]                                           | 1403.7607 | 56.4   | 1.73029191  |
| 7710042  | EElQSSISGVTAAYNR         | IQ motif containing GTPase activating protein 1 [Mus musculus]                                      | 1724.8466 | 71.93  | 1.830003584 |
| 27777677 | EELGDEWLTPDLFR           | deoxyribose-phosphate aldolase-like [Mus musculus]                                                  | 1719.8334 | 49.48  | 0.525155244 |
| 19527034 | EELSPASSGNVYDFFIGR       | lamin B receptor [Mus musculus]                                                                     | 2058.9822 | 23.54  | 1.0475339   |
| 6755863  | EESDDEAAVEEEEEEEKPK      | tumor rejection antigen gp96 [Mus musculus]                                                         | 2219.9685 | 81.25  | 0           |
| 31560222 | EESGAVAAAASVPAQSTAR      | PYD and CARD domain containing [Mus musculus]                                                       | 1772.886  | 88.18  | 0           |
| 7710042  | EEVQAGVDAANSAAQYQR       | IQ motif containing GTPase activating protein 1 [Mus musculus]                                      | 2034.9509 | 116.09 | 1.072370406 |
| 13385680 | EEWDIIEGLIR              | 2,4-dienoyl CoA reductase 1, mitochondrial [Mus musculus]                                           | 1372.7081 | 27.38  | 1.608129012 |
| 20330802 | EEYNGYTGAFR              | transferrin [Mus musculus]                                                                          | 1306.587  | 24.16  | 1.4501955   |
| 6679587  | EFADSLGIPFLETSK          | RAB1, member RAS oncogene family [Mus musculus]                                                     | 1724.869  | 66.08  | 1.088632223 |
| 21313162 | EFADSLGVPFLETSK          | RAB1B, member RAS oncogene family [Mus musculus]                                                    | 1710.8534 | 31.6   | 1.417018357 |
| 31542159 | EFDDLSPSEQQR             | ATPase, Ca++ transporting, ubiquitous [Mus musculus]                                                | 1363.6155 | 62     | 1.344818112 |
| 6806903  | EFDELSPSAQR              | ATPase, Ca++ transporting, cardiac muscle, slow twitch 2 [Mus musculus]                             | 1278.6002 | 65.76  | 1.175252101 |
| 21704156 | EFDPTITDGLSLGSPSR        | caldesmon 1 [Mus musculus]                                                                          | 1678.7976 | 91.28  | 1.348882744 |
| 51491880 | EFEEESKQPGVSEQQR         | metastasis-associated protein 2 [Mus musculus]                                                      | 1906.8805 | 76.97  | 1.047593606 |
| 6755863  | EFEPILLNWMK              | tumor rejection antigen gp96 [Mus musculus]                                                         | 1306.6554 | 48.69  | 0.46893423  |
| 13242328 | EFNEDGALAVLQQFK          | NS1-associated protein 1 [Mus musculus]                                                             | 1708.8536 | 57.47  | 0           |
| 31982275 | EFSDVVPYPISLR            | heat shock protein 4 [Mus musculus]                                                                 | 1735.9242 | 54.91  | 1.232310208 |
| 6677991  | EGAQYLMQAAGLGR           | solute carrier family 12, member 2 [Mus musculus]                                                   | 1464.734  | 48.62  | 0.65959058  |
| 14161694 | EGDFFFDSL                | myosin VIIb [Mus musculus]                                                                          | 1232.5706 | 25.12  | 1.068181013 |
| 21426821 | EGDVLTLLESER             | ribosomal protein S28 [Mus musculus]                                                                | 1360.7009 | 83.19  | 0.843336285 |
| 63594458 | EGDYFTQQGFEFR            | PREDICTED: source of immunodominant MHC-associated peptides [Mus musculus]                          | 1476.6415 | 46.65  | 1.178303344 |
| 29789191 | EGIDPAPYYWYTDQR          | asparaginyl-tRNA synthetase [Mus musculus]                                                          | 1873.8413 | 34.91  | 1.358272738 |
| 6679951  | EGIQTRNR                 | GATA binding protein 3 [Mus musculus]                                                               | 975.4709  | 20.74  | 0           |
| 6679439  | EGMNIVEAMER              | peptidylprolyl isomerase A [Mus musculus]                                                           | 1278.5914 | 70.72  | 1.137690104 |
| 63650244 | EGMNIVEAMER              | PREDICTED: similar to Peptidyl-prolyl cis-trans isomerase A (PPIase) (Rotamase) (Cyclophilin A) (Cy | 1278.5914 | 70.72  | 1.137690104 |
| 31981549 | EGNALFTFPNTPVK           | sulfide quinone reductase-like [Mus musculus]                                                       | 1534.7871 | 46.92  | 0.833293188 |
| 31980648 | EGNDLYHEMIESGVINLK       | ATP synthase, H+ transporting mitochondrial F1 complex, beta subunit [Mus musculus]                 | 2060.9927 | 77.02  | 2.073467211 |
| 63746482 | EGSYSISVLYGEEVEPR        | PREDICTED: filamin, alpha [Mus musculus]                                                            | 1913.9133 | 45.79  | 2.076080039 |
| 18079339 | EGWPLDIR                 | aconitase 2, mitochondrial [Mus musculus]                                                           | 985.519   | 33.79  | 1.01399701  |
| 12963527 | EHNGQVTGIDWAPESNR        | actin related protein 2/3 complex, subunit 1B [Mus musculus]                                        | 1909.8715 | 43.8   | 0.667768589 |
| 13385168 | EIDQEAAVEVSQLR           | ubiquinol-cytochrome c reductase, Rieske iron-sulfur polypeptide 1 [Mus musculus]                   | 1586.8019 | 62.98  | 1.536549501 |
| 51592084 | EIEIAEQEMPALMALR         | hypothetical protein LOC74340 [Mus musculus]                                                        | 1843.931  | 57.45  | 1.497507659 |
| 453155   | EIETYHNLLEGGQEDFESSGAGK  | keratin 9 [Homo sapiens]                                                                            | 2510.1174 | 75.94  | 0           |
| 7305085  | EIFEQPESVNTMR            | glutamine fructose-6-phosphate transaminase 1 [Mus musculus]                                        | 1678.8147 | 58     | 1.036890053 |
| 13994195 | EIFLSQPILLELEAPLK        | protein phosphatase 1, catalytic subunit, alpha [Mus musculus]                                      | 1953.1305 | 60.39  | 1.258199007 |
| 28173568 | EIFLSQPILLELEAPLK        | protein phosphatase 1, catalytic subunit, beta [Mus musculus]                                       | 1953.1305 | 60.39  | 1.258199007 |
| 31980772 | EIFLSQPILLELEAPLK        | protein phosphatase 1, catalytic subunit, gamma isoform [Mus musculus]                              | 1953.1305 | 60.39  | 1.258199007 |
| 6755901  | EIIDLVDR                 | tubulin, alpha 1 [Mus musculus]                                                                     | 1085.6267 | 60.98  | 1.092622548 |
| 34740335 | EIIDLVDR                 | tubulin, alpha 2 [Mus musculus]                                                                     | 1085.6267 | 60.98  | 1.092622548 |

2 Deamidation (NQ)

|          |                         |                                                                                                        |           |        |             |
|----------|-------------------------|--------------------------------------------------------------------------------------------------------|-----------|--------|-------------|
| 6678469  | EIIDLVDR                | tubulin, alpha 6 [Mus musculus]                                                                        | 1085.6267 | 60.98  | 1.092622548 |
| 9790219  | EILVGDVGGATIDPFK        | destrin [Mus musculus]                                                                                 | 1674.8959 | 102.93 | 1.714043186 |
| 6680924  | EILVGDVGGQVDDPYTFVK     | cofilin 1, non-muscle [Mus musculus]                                                                   | 2196.1042 | 84.36  | 1.300770541 |
| 27804325 | EIPVDAPWQAR             | monoamine oxidase A [Mus musculus]                                                                     | 1281.6611 | 47.3   | 1.694658295 |
| 20137008 | EISPDITLLDLQNDISELR     | biglycan [Mus musculus]                                                                                | 2286.1396 | 56.31  | 0.926695585 |
| 6671507  | EITALAPSTMK             | actin, alpha 2, smooth muscle, aorta [Mus musculus]                                                    | 1161.6177 | 63.6   | 1.372892093 |
| 6671509  | EITALAPSTMK             | actin, beta, cytoplasmic [Mus musculus]                                                                | 1161.6177 | 63.6   | 1.372892093 |
| 63652452 | EITALAPSTMK             | PREDICTED: similar to cytoplasmic beta-actin [Mus musculus]                                            | 1161.6177 | 63.6   | 1.372892093 |
| 6671507  | EITALAPSTMK             | actin, alpha 2, smooth muscle, aorta [Mus musculus]                                                    | 1177.6077 | 24.02  | 0           |
| 6671509  | EITALAPSTMK             | actin, beta, cytoplasmic [Mus musculus]                                                                | 1177.6077 | 24.02  | 0           |
| 63652452 | EITALAPSTMK             | PREDICTED: similar to cytoplasmic beta-actin [Mus musculus]                                            | 1177.6077 | 24.02  | 0           |
| 14861854 | EITINQSLAPLSDIDPTIQVR   | keratin complex 2, basic, gene 7 [Mus musculus]                                                        | 2663.4385 | 23.15  | 1.409103636 |
| 6678523  | EIYTNLGR                | ubiquitin specific protease 9, X chromosome [Mus musculus]                                             | 1062.5527 | 24.47  | 0.757806104 |
| 22203747 | EKDFDSLAAQPSFFDR        | procollagen, type VI, alpha 2 [Mus musculus]                                                           | 1801.8516 | 53.21  | 0.572859293 |
| 28269703 | EKEEEEEDEEDASGGDQDEER   | RAD21 homolog [Mus musculus]                                                                           | 2711.0249 | 100.91 | 1.2225461   |
| 6755372  | ELAEDGYSVEVR            | ribosomal protein S3 [Mus musculus]                                                                    | 1423.6642 | 54.15  | 0.899225966 |
| 51712562 | ELAPYDENWFYTR           | PREDICTED: similar to ribosomal protein S19 [Mus musculus]                                             | 1703.7758 | 26.84  | 1.256362136 |
| 24429590 | ELDALDANDELTPLGR        | DEAH (Asp-Glu-Ala-His) box polypeptide 9 [Mus musculus]                                                | 1741.8623 | 78.55  | 0.965612103 |
| 7305295  | ELDEATESNEAMGR          | myosin, heavy polypeptide 11, smooth muscle [Mus musculus]                                             | 1551.6638 | 108.8  | 2.146409156 |
| 19482160 | ELEEDFIR                | coactosin-like 1 [Mus musculus]                                                                        | 1050.5159 | 40.87  | 1.097922052 |
| 31981722 | ELEEIVQIISK             | heat shock 70kD protein 5 (glucose-regulated protein) [Mus musculus]                                   | 1397.7838 | 39.89  | 0.827216584 |
| 6677813  | ELEFYLR                 | ribosomal protein S8 [Mus musculus]                                                                    | 969.5076  | 39.24  | 0.913151899 |
| 7305295  | ELEGHISDLQEDLDSER       | myosin, heavy polypeptide 11, smooth muscle [Mus musculus]                                             | 1984.9077 | 101.51 | 1.828389799 |
| 20137006 | ELETQISELQEDLESER       | myosin, heavy polypeptide 9, non-muscle [Mus musculus]                                                 | 2047.9697 | 112.19 | 1.113893226 |
| 6680067  | ELFEADPER               | glucose phosphate isomerase 1 [Mus musculus]                                                           | 1105.5215 | 45.4   | 1.43130217  |
| 29336026 | ELFQETLESRL             | nonmuscle myosin heavy chain [Mus musculus]                                                            | 1364.7126 | 56.63  | 1.265440708 |
| 23956084 | ELGAFGLQVPELGGGLSNTQYAR | acyl-Coenzyme A dehydrogenase, very long chain [Mus musculus]                                          | 2577.3198 | 31.92  | 1.38961144  |
| 6753036  | ELGEYGLQAYTEVK          | aldehyde dehydrogenase 2, mitochondrial [Mus musculus]                                                 | 1599.7888 | 56.69  | 1.899930368 |
| 63476037 | ELGTIQVISER             | PREDICTED: procollagen, type VI, alpha 3 [Mus musculus]                                                | 1372.7451 | 34.73  | 0.752415648 |
| 13386054 | ELLLQPVTISR             | actin related protein 2/3 complex, subunit 4 [Mus musculus]                                            | 1268.764  | 23.3   | 0.992147302 |
| 6679687  | ELNDFISYLR              | glucose regulated protein [Mus musculus]                                                               | 1397.7163 | 75.89  | 0.85174814  |
| 30023842 | ELQELVQYPVEHPDK         | valosin containing protein [Mus musculus]                                                              | 1823.9097 | 65.49  | 0.789595525 |
| 13624315 | ELQSQISDTSVVLSDMNSR     | keratin complex 2, basic, gene 8 [Mus musculus]                                                        | 2109.0193 | 170.94 | 1.316544024 |
| 2506774  | ELQSQISDTSVVLSDMNSR     | Keratin, type II cytoskeletal 8 (Cytokeratin 8) (K8) (CK 8)                                            | 2109.0193 | 170.94 | 1.316544024 |
| 63565108 | ELQSQISDTSVVLSDMNSR     | PREDICTED: similar to cytokeatin EndoA - mouse [Mus musculus]                                          | 2109.0193 | 170.94 | 1.316544024 |
| 16716499 | ELQVGIPVTEAGQR          | sideroflexin 3 [Mus musculus]                                                                          | 1611.8347 | 42.02  | 0           |
| 29336026 | ELSSAESQLHDTQELLQEETR   | nonmuscle myosin heavy chain [Mus musculus]                                                            | 2443.1753 | 47.96  | 1.972558446 |
| 547749   | ELTTEIDNIEQISSYK        | Keratin, type I cytoskeletal 10 (Cytokeratin 10) (K10) (CK 10)                                         | 1996.9554 | 75.33  | 0           |
| 31982522 | ELVPIAAQLDR             | acyl-Coenzyme A dehydrogenase, short chain [Mus musculus]                                              | 1224.692  | 27.48  | 1.462187884 |
| 6679082  | ELYTLLNENYVEDDDNMFRR    | N-mristoyltransferase 1 [Mus musculus]                                                                 | 2393.0698 | 29.58  | 1.004666722 |
| 31982755 | EMEENFALEAANYQDTIGR     | vimentin [Mus musculus]                                                                                | 2200.991  | 51.15  | 0           |
| 7305295  | EMEGLSQYEEK             | myosin, heavy polypeptide 11, smooth muscle [Mus musculus]                                             | 1470.6421 | 56.61  | 1.574869205 |
| 6671666  | EMNDAAMFYTNR            | CAP, adenylate cyclase-associated protein 1 [Mus musculus]                                             | 1462.6217 | 62.85  | 0.767535907 |
| 31560680 | ENDYYTPTGFEFR           | integral membrane protein 1 [Mus musculus]                                                             | 1491.6432 | 58.44  | 0.784237878 |
| 39204553 | ENEFSFEDNAIR            | chromodomain helicase DNA binding protein 4 [Mus musculus]                                             | 1470.6674 | 22.44  | 0.995751517 |
| 63518335 | ENEFSFEDNAIR            | PREDICTED: chromodomain helicase DNA binding protein 5 [Mus musculus]                                  | 1470.6674 | 22.44  | 0.995751517 |
| 33859809 | ENENVINEYSSILEDR        | fibrinogen, B beta polypeptide [Mus musculus]                                                          | 2051.9636 | 32.55  | 1.203477856 |
| 13384736 | ENFIPTIVNFSAAEISDAIR    | dynein, cytoplasmic, heavy chain 1 [Mus musculus]                                                      | 2265.1399 | 38.13  | 1.358707254 |
| 22267442 | ENMAYTVEGIR             | ubiquinol cytochrome c reductase core protein 2 [Mus musculus]                                         | 1282.6177 | 49.04  | 1.029053143 |
| 6753484  | ENYAELLDDGFLK           | procollagen, type VI, alpha 1 [Mus musculus]                                                           | 1526.7389 | 81.51  | 0.692098272 |
| 6754508  | EPAAPVSIQR              | LIM and SH3 protein 1 [Mus musculus]                                                                   | 1067.5903 | 54.82  | 1.12782767  |
| 33469029 | EPGEAAAEAAEEAR          | acyl-Coenzyme A binding domain containing 3 [Mus musculus]                                             | 1457.6538 | 58.03  | 1.364366024 |
| 31982290 | EPIMPAPGQEETVR          | LIM domain containing preferred translocation partner in lipoma [Mus musculus]                         | 1553.7557 | 89.1   | 1.087618961 |
| 31981657 | EPITVSEQMSHFR           | carbonic anhydrase 2 [Mus musculus]                                                                    | 1647.785  | 105.28 | 1.676228168 |
| 51708124 | EPPTDVTPTFLTGTGLSTLR    | PREDICTED: similar to GMP synthase [glutamine-hydrolyzing] (Glutamine amidotransferase) (GMP synthase) | 2145.1318 | 20.74  | 0.774107369 |
| 6679891  | EPWLLASQYQDAIR          | alpha glucosidase 2 alpha neutral subunit [Mus musculus]                                               | 1689.8622 | 25.82  | 0           |
| 13385728 | EQEAPEEQEEDSSSDPR       | microfibrillar-associated protein 1 [Mus musculus]                                                     | 2090.8254 | 49.59  | 1.02598415  |
| 6680836  | EQFLDGDWNTNR            | calreticulin [Mus musculus]                                                                            | 1451.6649 | 83.09  | 0.889981491 |
| 9625037  | EQGQAPITPQQGQALAK       | ras homolog gene family, member G [Mus musculus]                                                       | 1764.9216 | 31.25  | 1.426617238 |
| 22094075 | EQGVLSFWR               | solute carrier family 25, member 5 [Mus musculus]                                                      | 1121.5837 | 60.25  | 1.367694688 |

|          |                           |                                                                                                     |           |       |             |
|----------|---------------------------|-----------------------------------------------------------------------------------------------------|-----------|-------|-------------|
| 50355690 | EQIVPKPEEEVAQK            | ribosomal protein L17 [Mus musculus]                                                                | 1623.8555 | 52.59 | 1.190897381 |
| 6678499  | EQVVVDSLHPGVSADDQVSR      | UDP-glucose dehydrogenase [Mus musculus]                                                            | 2151.0667 | 83.19 | 1.689647137 |
| 6754782  | EQLLQSNPVLFAFGNAK         | myosin IB [Mus musculus]                                                                            | 1857.9725 | 25.93 | 1.267499104 |
| 51766008 | EQLLQSNPVLFAFGNAK         | PREDICTED: myosin IA [Mus musculus]                                                                 | 1857.9725 | 25.93 | 1.267499104 |
| 18252782 | EQLQDMGLIDLFSPEK          | serine (or cysteine) proteinase inhibitor, clade C (antithrombin), member 1 [Mus musculus]          | 1862.931  | 66.19 | 0           |
| 29336026 | EQMEEEVVAR                | nonmuscle myosin heavy chain [Mus musculus]                                                         | 1219.5691 | 21.69 | 0           |
| 21450277 | EQPLDEELKDAFQNAYLELGLGER  | Na <sup>+</sup> /K <sup>+</sup> -ATPase alpha 1 subunit [Mus musculus]                              | 2834.3857 | 28.11 | 1.146421118 |
| 13384736 | EQPWVSVQPR                | dynein, cytoplasmic, heavy chain 1 [Mus musculus]                                                   | 1225.6346 | 29.36 | 1.238808636 |
| 18700024 | EQTEGEYSLSHESEAK          | isocitrate dehydrogenase 3, beta subunit [Mus musculus]                                             | 1823.8014 | 70.86 | 0.963937455 |
| 40556608 | EQVANSAFVER               | heat shock protein 1, beta [Mus musculus]                                                           | 1249.6134 | 48.37 | 1.208845131 |
| 30348966 | EQWANLEQLSAIR             | spectrin beta 2 isoform 1 [Mus musculus]                                                            | 1557.8058 | 34.01 | 0.672749705 |
| 7106421  | EQWANLEQLSAIR             | spectrin beta 2 isoform 2 [Mus musculus]                                                            | 1557.8058 | 34.01 | 0.672749705 |
| 63750688 | ESNQPPEDSSPPASSESSSTR     | PREDICTED: HECT, UBA and WWE domain containing 1 [Mus musculus]                                     | 2175.9402 | 67.04 | 0.8835075   |
| 6678752  | ESPYDHQSLQATALQEAFSTR     | lymphocyte antigen 74 [Mus musculus]                                                                | 2308.0776 | 61.38 | 1.3981502   |
| 6754994  | ESTGAQVQVAGDMLPNSTER      | poly(rC) binding protein 1 [Mus musculus]                                                           | 2089.99   | 76.72 | 1.121576245 |
| 6756049  | ESVLDKSDLKK               | zinc finger protein 148 [Mus musculus]                                                              | 1261.7192 | 20.56 | 2.024768699 |
| 9910482  | ESVQVPDDQDFR              | START domain containing 10 [Mus musculus]                                                           | 1434.6528 | 27.89 | 1.359858231 |
| 20874851 | ESYSVYVYK                 | PREDICTED: similar to histone H2b-616 [Mus musculus]                                                | 1137.5431 | 28.99 | 0           |
| 22122515 | ETFLTSPPELYR              | AHA1, activator of heat shock 90kDa protein ATPase homolog 1 [Mus musculus]                         | 1484.7294 | 37.14 | 1.077358102 |
| 63691573 | ETPDTLSDPQTVPEEER         | PREDICTED: zinc finger protein 294 [Mus musculus]                                                   | 1942.899  | 20.37 | 1.247372818 |
| 6753060  | ETSGNLEQLLAVVK            | annexin A5 [Mus musculus]                                                                           | 1613.9056 | 25.13 | 1.861664465 |
| 7305403  | ETSLHSPNNTSASHSQGGGPPTSGM | pantophysin isoform 1 [Mus musculus]                                                                | 2411.0352 | 47.99 | 1.010323329 |
| 63492203 | ETSYEALANQR               | PREDICTED: ribosome binding protein 1 [Mus musculus]                                                | 1410.6504 | 89.43 | 0.785958681 |
| 29825827 | ETTGTGPNVYHENDTIK         | hypothetical protein LOC69091 [Mus musculus]                                                        | 1946.9087 | 23.53 | 1.947927776 |
| 21450291 | ETTIQGLDGLSER             | aldolase 2, B isoform [Mus musculus]                                                                | 1418.7205 | 30.43 | 4.254598071 |
| 22122523 | ETTPFYPR                  | GDP-mannose 4, 6-dehydratase [Mus musculus]                                                         | 1010.4973 | 27.12 | 1.17857739  |
| 30023842 | ETVVEVPQVTWEDIGGLEDKVR    | valosin containing protein [Mus musculus]                                                           | 2498.2703 | 51.69 | 0           |
| 6753670  | EVAEQLAIEYGPDR            | dolichol-phosphate (beta-D) mannosyltransferase 1 [Mus musculus]                                    | 1589.7749 | 21.94 | 1.561030108 |
| 31560449 | EVAGQVGVPLQLDMVR          | aspartyl aminopeptidase [Mus musculus]                                                              | 1710.9237 | 32.5  | 0.954963066 |
| 30348966 | EVDLEQWIAER               | spectrin beta 2 isoform 1 [Mus musculus]                                                            | 1502.7198 | 53.12 | 1.028519576 |
| 7106421  | EVDLEQWIAER               | spectrin beta 2 isoform 2 [Mus musculus]                                                            | 1502.7198 | 53.12 | 1.028519576 |
| 63650229 | EVDEQMLNVQNK              | PREDICTED: similar to TUBULIN BETA CHAIN (T BETA-15) [Mus musculus]                                 | 1446.6913 | 83.97 | 1.185749356 |
| 22165384 | EVDEQMLNVQNK              | tubulin, beta, 2 [Mus musculus]                                                                     | 1446.6913 | 83.97 | 1.185749356 |
| 7106439  | EVDEQMLNVQNK              | tubulin, beta 5 [Mus musculus]                                                                      | 1446.6913 | 83.97 | 1.185749356 |
| 21746161 | EVDEQMLNVQNK              | tubulin, beta [Mus musculus]                                                                        | 1446.6913 | 83.97 | 1.185749356 |
| 30023842 | EVDIGIPDATGR              | valosin containing protein [Mus musculus]                                                           | 1242.6333 | 50.03 | 1.198883995 |
| 12963527 | EVEERPAPTPWGSK            | actin related protein 2/3 complex, subunit 1B [Mus musculus]                                        | 1582.791  | 31.77 | 0.889111741 |
| 29789052 | EVENEQTPVSEPEEEK          | erythrocyte protein band 4.1-like 2 [Mus musculus]                                                  | 1872.8367 | 41.16 | 1.361066009 |
| 14149756 | EVEPEPTEEKDVDADEEDSR      | eukaryotic translation initiation factor 2, subunit 2 (beta) [Mus musculus]                         | 2317.9797 | 97.31 | 1.184310487 |
| 46593021 | EVESIGAHLNAYSTR           | ubiquinol-cytochrome c reductase core protein 1 [Mus musculus]                                      | 1646.8136 | 33.32 | 1.254277113 |
| 31543315 | EVFEDAMEIR                | nucleolin [Mus musculus]                                                                            | 1238.5793 | 32.52 | 1.543421319 |
| 31980685 | EVGAFGTPVINLGR            | glucosamine [Mus musculus]                                                                          | 1530.8322 | 66.36 | 0.833283771 |
| 7305295  | EVLQVEDER                 | myosin, heavy polypeptide 11, smooth muscle [Mus musculus]                                          | 1229.635  | 36.83 | 1.95069229  |
| 33859811 | EVQSEFIEVMNEIWANDQIR      | hydroxyacyl-Coenzyme A dehydrogenase/3-ketoacyl-Coenzyme A thiolase/enoyl-Coenzyme A hydratase (tri | 2450.1763 | 42.99 | 0.993285281 |
| 6679737  | EVSGNELIQTYYEGVEAK        | fatty acid binding protein 2, intestinal [Mus musculus]                                             | 2130.0195 | 25.15 | 0           |
| 63589709 | EVSTPQDVHTTQGVPAAR        | PREDICTED: vacuolar protein sorting 13C [Mus musculus]                                              | 1892.9426 | 20.23 | 0           |
| 21450129 | EVMGNVIQGGEGQAPTR         | acetyl-Coenzyme A acetyltransferase 1 precursor [Mus musculus]                                      | 1905.9178 | 95.91 | 1.181311422 |
| 31560611 | EWIEGVTGR                 | calponin 1 [Mus musculus]                                                                           | 1046.5311 | 59.25 | 1.167404265 |
| 9625037  | EYIPTVFDNYSQAQSAVDGR      | ras homolog gene family, member G [Mus musculus]                                                    | 2131.9941 | 66.48 | 1.39565887  |
| 33563250 | EYQDLLNVK                 | desmin [Mus musculus]                                                                               | 1121.5828 | 47.2  | 0           |
| 34328368 | EYQDLLNVK                 | internexin neuronal intermediate filament protein, alpha [Mus musculus]                             | 1121.5828 | 47.2  | 0           |
| 31982755 | EYQDLLNVK                 | vimentin [Mus musculus]                                                                             | 1121.5828 | 47.2  | 0           |
| 29244176 | EYQELMNVK                 | hypothetical protein 4732456N10 [Mus musculus]                                                      | 1153.5499 | 36    | 1.302866558 |
| 13624315 | EYQELMNVK                 | keratin complex 2, basic, gene 8 [Mus musculus]                                                     | 1153.5499 | 36    | 1.302866558 |
| 29789317 | EYQELMNVK                 | keratinocyte associated protein 1 [Mus musculus]                                                    | 1153.5499 | 36    | 1.302866558 |
| 1346345  | EYQELMNVK                 | Keratin, type II cytoskeletal 6B (Cytokeratin 6B) (CK 6B) (K6b keratin)                             | 1153.5499 | 36    | 1.302866558 |
| 2506774  | EYQELMNVK                 | Keratin, type II cytoskeletal 8 (Cytokeratin 8) (K8) (CK 8)                                         | 1153.5499 | 36    | 1.302866558 |
| 41054806 | EYQLNDSAAYLYNDLER         | guanine nucleotide binding protein, alpha inhibiting 2 [Mus musculus]                               | 2076.9617 | 73.03 | 0.947236154 |
| 13384736 | EYQTQLIQR                 | dynein, cytoplasmic, heavy chain 1 [Mus musculus]                                                   | 1178.618  | 30.53 | 1.479509289 |
| 63635087 | EYSSELNAPSQESDShPR        | PREDICTED: RNA binding motif protein 25 [Mus musculus]                                              | 2032.8822 | 80.01 | 0.820713177 |

|          |                       |                  |                                                                                                     |           |       |             |
|----------|-----------------------|------------------|-----------------------------------------------------------------------------------------------------|-----------|-------|-------------|
| 31560560 | FAAATGATPIAGR         |                  | laminin receptor 1 (ribosomal protein SA) [Mus musculus]                                            | 1203.6484 | 74.03 | 1.166795442 |
| 6680067  | FAAYFQQGDME5NGK       |                  | glucose phosphate isomerase 1 [Mus musculus]                                                        | 1692.7611 | 36.57 | 0.818989958 |
| 31982755 | FADLSEANR             |                  | vimentin [Mus musculus]                                                                             | 1093.5321 | 54.99 | 1.220160342 |
| 31560613 | FAEAFEAIPR            |                  | chaperonin subunit 8 (theta) [Mus musculus]                                                         | 1150.5944 | 41.87 | 0.940036509 |
| 6755863  | FAFQAEVNR             |                  | tumor rejection antigen gp96 [Mus musculus]                                                         | 1081.5485 | 39.07 | 0.770904583 |
| 7710042  | FALGISAINAEVDSGDVGR   |                  | IQ motif containing GTPase activating protein 1 [Mus musculus]                                      | 1890.9474 | 41.24 | 1.152671758 |
| 6753240  | FAMEPEEFDSDLR         |                  | calcium binding protein, intestinal [Mus musculus]                                                  | 1686.7411 | 75.09 | 0.979794539 |
| 21704206 | FAPPEAPEPWSGVR        |                  | carboxylesterase 2 [Mus musculus]                                                                   | 1539.7664 | 39.36 | 0           |
| 51772153 | FAQPGSFYEYAMR         |                  | PREDICTED: similar to Non-POU-domain-containing, octamer binding protein [Mus musculus]             | 1695.756  | 32.26 | 1.124092796 |
| 33563250 | FASEANGYQDNIAR        |                  | desmin [Mus musculus]                                                                               | 1555.7183 | 89.01 | 1.643656164 |
| 33563250 | FASEANGYQDNIAR        | Deamidation (NQ) | desmin [Mus musculus]                                                                               | 1556.6993 | 51.57 | 2.807427666 |
| 63476037 | FASEIVDTVYEDGDSIR     |                  | PREDICTED: procollagen, type VI, alpha 3 [Mus musculus]                                             | 1915.8966 | 75.18 | 0.665294141 |
| 31560611 | FASQQGMTAYGTR         |                  | calponin 1 [Mus musculus]                                                                           | 1417.6544 | 91.31 | 1.839249524 |
| 22203747 | FAYNQLIK              |                  | procollagen, type VI, alpha 2 [Mus musculus]                                                        | 996.5508  | 47.19 | 0.741501925 |
| 6679299  | FDAGELITQR            |                  | prohibitin [Mus musculus]                                                                           | 1149.5919 | 26.81 | 1.320839734 |
| 6678573  | FDALTMHVQPQVAAQKQ     |                  | villin 1 [Mus musculus]                                                                             | 1911.9694 | 38.04 | 1.50112176  |
| 63638100 | FDGALNVDLTFEQTNLVPYPR |                  | PREDICTED: similar to tubulin, alpha 1 [Mus musculus]                                               | 2409.2073 | 61.29 | 1.248096521 |
| 6755901  | FDGALNVDLTFEQTNLVPYPR |                  | tubulin, alpha 1 [Mus musculus]                                                                     | 2409.2073 | 61.29 | 1.248096521 |
| 34740335 | FDGALNVDLTFEQTNLVPYPR |                  | tubulin, alpha 2 [Mus musculus]                                                                     | 2409.2073 | 61.29 | 1.248096521 |
| 6678467  | FDGALNVDLTFEQTNLVPYPR |                  | tubulin, alpha 4 [Mus musculus]                                                                     | 2409.2073 | 61.29 | 1.248096521 |
| 6678469  | FDGALNVDLTFEQTNLVPYPR |                  | tubulin, alpha 6 [Mus musculus]                                                                     | 2409.2073 | 61.29 | 1.248096521 |
| 63638100 | FDLMYAK               |                  | PREDICTED: similar to tubulin, alpha 1 [Mus musculus]                                               | 887.4402  | 31.97 | 0.706603455 |
| 6755901  | FDLMYAK               |                  | tubulin, alpha 1 [Mus musculus]                                                                     | 887.4402  | 31.97 | 0.706603455 |
| 34740335 | FDLMYAK               |                  | tubulin, alpha 2 [Mus musculus]                                                                     | 887.4402  | 31.97 | 0.706603455 |
| 6678467  | FDLMYAK               |                  | tubulin, alpha 4 [Mus musculus]                                                                     | 887.4402  | 31.97 | 0.706603455 |
| 6678469  | FDLMYAK               |                  | tubulin, alpha 6 [Mus musculus]                                                                     | 887.4402  | 31.97 | 0.706603455 |
| 13385280 | FDQLFDDESDPFVLEK      |                  | PAI-1 mRNA-binding protein [Mus musculus]                                                           | 1943.8997 | 72.38 | 0.943390993 |
| 7710042  | FDVPGDENAEMDAR        |                  | IQ motif containing GTPase activating protein 1 [Mus musculus]                                      | 1565.6628 | 39.21 | 1.346481214 |
| 21704020 | FEAPLFNAR             |                  | NADH dehydrogenase (ubiquinone) Fe-S protein 1 [Mus musculus]                                       | 1064.5579 | 32.86 | 1.858734512 |
| 10092608 | FEDGDLTLYQSNAILR      |                  | glutathione S-transferase, pi 1 [Mus musculus]                                                      | 1854.9236 | 99.11 | 1.101933564 |
| 31981690 | FEELNADLFR            |                  | heat shock protein 8 [Mus musculus]                                                                 | 1253.6136 | 77.43 | 1.147322628 |
| 31981722 | FEELNMDLFR            |                  | heat shock 70kD protein 5 (glucose-regulated protein) [Mus musculus]                                | 1313.6305 | 53.77 | 0.637525005 |
| 22203755 | FEELTNLIR             |                  | eukaryotic translation initiation factor 3, subunit 8 [Mus musculus]                                | 1134.6184 | 25.02 | 0           |
| 9790073  | FEEQVYNIPIR           |                  | cadherin 17 [Mus musculus]                                                                          | 1407.7333 | 61.64 | 1.4074148   |
| 13385374 | FEIWDTAGQER           |                  | RAB5A, member RAS oncogene family [Mus musculus]                                                    | 1351.646  | 32.61 | 0.689581437 |
| 34996495 | FELDTSER              |                  | ribophorin II [Mus musculus]                                                                        | 996.4673  | 30.29 | 1.153656662 |
| 31981690 | FELTGIPPAPR           |                  | heat shock protein 8 [Mus musculus]                                                                 | 1197.6591 | 43.69 | 1.141374354 |
| 63650244 | FENENFILK             | Deamidation (NQ) | PREDICTED: similar to Peptidyl-prolyl cis-trans isomerase A (PPIase) (Rotamase) (Cyclophilin A) (Cy | 1154.5719 | 60.36 | 0           |
| 30348966 | FESLEPEMNNQASR        |                  | spectrin beta 2 isoform 1 [Mus musculus]                                                            | 1651.7426 | 55.2  | 0.91968132  |
| 7106421  | FESLEPEMNNQASR        |                  | spectrin beta 2 isoform 2 [Mus musculus]                                                            | 1651.7426 | 55.2  | 0.91968132  |
| 6678145  | FFDEESYSLLR           |                  | signal sequence receptor, delta [Mus musculus]                                                      | 1405.678  | 70.17 | 0.990305048 |
| 63641940 | FFDQYR                |                  | PREDICTED: desmoplakin [Mus musculus]                                                               | 875.4075  | 21.78 | 0.91240129  |
| 16716471 | FFQELPASDSAFK         |                  | hypothetical protein LOC94184 [Mus musculus]                                                        | 1486.7212 | 40.57 | 0           |
| 8567336  | FFTAFDANGR            |                  | chloride channel calcium activated 3 [Mus musculus]                                                 | 1145.5455 | 63.14 | 0.254313267 |
| 8567336  | FFTAFDANGR            | Deamidation (NQ) | chloride channel calcium activated 3 [Mus musculus]                                                 | 1146.5319 | 53.37 | 0           |
| 63594458 | FGEMQLDFR             |                  | PREDICTED: source of immunodominant MHC-associated peptides [Mus musculus]                          | 1142.5438 | 21.2  | 0           |
| 19526818 | FGFYEVFK              |                  | solute carrier family 25 (mitochondrial carrier, phosphate carrier), member 3 [Mus musculus]        | 1036.521  | 41.16 | 1.297206395 |
| 21704096 | FGGNPGGFGNQGGFGNSR    |                  | TAR DNA binding protein isoform 1 [Mus musculus]                                                    | 1726.7733 | 109.6 | 1.130055787 |
| 13384736 | FGNPLLVQDVE5YDPVLPVLR |                  | dynein, cytoplasmic, heavy chain 1 [Mus musculus]                                                   | 2598.3311 | 20.75 | 1.236127966 |
| 31981562 | FGVEQDQDMVFASFIR      |                  | pyruvate kinase 3 [Mus musculus]                                                                    | 1859.9104 | 52.15 | 1.220096704 |
| 31981562 | FGVEQDQDMVFASFIR      | Oxidation (M)    | pyruvate kinase 3 [Mus musculus]                                                                    | 1875.901  | 35.64 | 1.412933148 |
| 63487095 | FHPEPYGLEDDQR         |                  | PREDICTED: catenin src [Mus musculus]                                                               | 1602.7449 | 28.8  | 0.863454829 |
| 6671690  | FHQLDIDNPQSIR         |                  | carbonyl reductase 1 [Mus musculus]                                                                 | 1582.7975 | 53.39 | 1.772878662 |
| 52317152 | FIEGPTVYSEAPR         |                  | phospholipase A2, group IVC (cytosolic, calcium-independent) [Mus musculus]                         | 1465.7339 | 63.01 | 0           |
| 6679687  | FISDKDASVVGFFR        |                  | glucose regulated protein [Mus musculus]                                                            | 1587.8164 | 59    | 0           |
| 18079339 | FKLEAPDADELPR         |                  | aconitase 2, mitochondrial [Mus musculus]                                                           | 1500.7719 | 67.17 | 1.478835992 |
| 31560680 | FLAEEGFYK             |                  | integral membrane protein 1 [Mus musculus]                                                          | 1103.5538 | 31.05 | 0           |
| 33563250 | FLEQQNAALAAEVNR       |                  | desmin [Mus musculus]                                                                               | 1673.8633 | 89.25 | 1.628397356 |
| 482387   | FLEQQNQVLQTK          |                  | keratin, 67K type II epidermal - human                                                              | 1475.7845 | 95.18 | 0.045944367 |
| 51092293 | FLEQQNQVLQTK          |                  | keratin complex 2, basic, gene 39 [Mus musculus]                                                    | 1475.7845 | 95.18 | 0.045944367 |

|          |                          |                  |                                                                                                      |           |        |             |
|----------|--------------------------|------------------|------------------------------------------------------------------------------------------------------|-----------|--------|-------------|
| 1346343  | FLEQQNQVLQTK             |                  | Keratin, type II cytoskeletal 1 (Cytokeratin 1) (K1) (CK 1) (67 kDa cyto keratin) (Hair alpha protei | 1475.7845 | 95.18  | 0.045944367 |
| 31981246 | FLIDGFPR                 |                  | UMP-CMP kinase [Mus musculus]                                                                        | 964.5352  | 38.32  | 1.103152738 |
| 6756041  | FLIPNASQPESK             |                  | tyrosine 3-monoxygenase/tryptophan 5-monoxygenase activation protein, zeta polypeptide [Mus muscu    | 1330.6921 | 33.9   | 0           |
| 6753618  | FLTEELSLDQDR             |                  | D-dopachrome tautomerase [Mus musculus]                                                              | 1465.7169 | 23.67  | 1.861661146 |
| 29336026 | FLTNGPSSSPGQER           |                  | nonmuscle myosin heavy chain [Mus musculus]                                                          | 1476.7123 | 93.41  | 1.200905385 |
| 13384828 | FMTEDTTDAPFR             |                  | serine (or cysteine) proteinase inhibitor, clade B, member 1a [Mus musculus]                         | 1430.6315 | 41.75  | 1.032915469 |
| 16418339 | FNADEFEDMVAEK            |                  | ribosomal protein 10 [Mus musculus]                                                                  | 1544.665  | 67.01  | 1.50641276  |
| 6671622  | FNASQLITQR               |                  | B-cell receptor-associated protein 37 [Mus musculus]                                                 | 1177.634  | 42.07  | 1.374997072 |
| 63660302 | FNDEHIPDSPYLVPVPIAPSDAR  |                  | PREDICTED: filamin B, beta [Mus musculus]                                                            | 2567.2419 | 44.68  | 0.763038324 |
| 63746482 | FNEEHIPDSPFVVPVVASPSGDAR |                  | PREDICTED: filamin, alpha [Mus musculus]                                                             | 2467.1836 | 69.31  | 1.47006386  |
| 18079339 | FNPETDFLTGK              |                  | aconitase 2, mitochondrial [Mus musculus]                                                            | 1268.6198 | 57.07  | 1.297145128 |
| 18079339 | FNPETDFLTGK              | Deamidation (NQ) | aconitase 2, mitochondrial [Mus musculus]                                                            | 1269.6249 | 22.87  | 0           |
| 6677777  | FNPFVTSR                 |                  | ribosomal protein L26 [Mus musculus]                                                                 | 1082.5309 | 53.83  | 0.871430085 |
| 6753272  | FNSANEDNVTQVR            |                  | catalase [Mus musculus]                                                                              | 1493.7173 | 49.24  | 0.822338006 |
| 27228985 | FNVSATPEQYYPYSTTR        |                  | 13kDa differentiation-associated protein [Mus musculus]                                              | 1959.9467 | 31.39  | 1.258094044 |
| 6678365  | FNWWDTAGQEK              |                  | RAN, member RAS oncogene family [Mus musculus]                                                       | 1294.6168 | 58.77  | 0.813914074 |
| 30911099 | FPQLDDTSFANSR            |                  | fatty acid synthase [Mus musculus]                                                                   | 1497.705  | 57.31  | 0           |
| 8567336  | FPSPTVYASIR              |                  | chloride channel calcium activated 3 [Mus musculus]                                                  | 1336.7299 | 79.64  | 0.21255495  |
| 51491880 | FQAEIPDR                 |                  | metastasis-associated protein 2 [Mus musculus]                                                       | 975.4854  | 29.32  | 0.667099667 |
| 33859560 | FQILEGPPESMGR            |                  | guanosine diphosphate (GDP) dissociation inhibitor 1 [Mus musculus]                                  | 1460.7246 | 24.58  | 0           |
| 40254595 | FQLTDSQIYEVLSVIR         |                  | dihydropyrimidinase-like 2 [Mus musculus]                                                            | 1911.0239 | 24.21  | 0.885509304 |
| 40254595 | FQMPDQGMTSADDFQGTGK      |                  | dihydropyrimidinase-like 2 [Mus musculus]                                                            | 2150.936  | 61.72  | 1.344129261 |
| 6755863  | FQSSHSTDTISLDQYVER       |                  | tumor rejection antigen gp96 [Mus musculus]                                                          | 2250.0413 | 44.88  | 0.815979141 |
| 23943876 | FSHSGNQLDGPITAFR         |                  | zymogen granule membrane protein 16 [Mus musculus]                                                   | 1746.8636 | 88.65  | 1.056367976 |
| 31543113 | FSLVGIAGQDLNEGNR         |                  | lymphocyte cytosolic protein 1 [Mus musculus]                                                        | 1689.8665 | 21.72  | 0           |
| 31541909 | FSMVLPEVEAAAEIPGVR       |                  | isochorismatase domain containing 1 [Mus musculus]                                                   | 2028.0895 | 31     | 3.945794529 |
| 6671539  | FSNEEIAMATVTALR          |                  | aldolase 1, A isoform [Mus musculus]                                                                 | 1652.8365 | 84.31  | 0.941434182 |
| 16716471 | FSPLMTAEGLGTR            |                  | hypothetical protein LOC94184 [Mus musculus]                                                         | 1379.7079 | 59.63  | 1.431844293 |
| 28893559 | FSPPEETGPSR              |                  | melanoma inhibitory activity 3 [Mus musculus]                                                        | 1203.5648 | 44.4   | 1.177816252 |
| 1346343  | FSSCGGGGSGFGAGGGFGRS     |                  | Keratin, type II cytoskeletal 1 (Cytokeratin 1) (K1) (CK 1) (67 kDa cyto keratin) (Hair alpha protei | 1708.7118 | 26.47  | 0           |
| 21450241 | FSSQEAASFGDDR            |                  | propionyl-Coenzyme A carboxylase, alpha polypeptide [Mus musculus]                                   | 1503.645  | 77.11  | 1.051674175 |
| 31982171 | FSTSQSLPASQTR            |                  | murinoglobulin 1 [Mus musculus]                                                                      | 1409.6993 | 23.54  | 1.660989691 |
| 33859482 | FVSPVVR                  |                  | eukaryotic translation elongation factor 2 [Mus musculus]                                            | 890.5168  | 36.46  | 0.966181147 |
| 31560560 | FTPGFTTNIQAAFR           |                  | laminin receptor 1 (ribosomal protein SA) [Mus musculus]                                             | 1698.8668 | 36.39  | 2.781003785 |
| 31980648 | FTQAGSEVSALLGR           |                  | ATP synthase, H+ transporting mitochondrial F1 complex, beta subunit [Mus musculus]                  | 1435.7628 | 105.98 | 1.062317906 |
| 13384736 | FTQDTQPHYIYSPR           |                  | dynein, cytoplasmic, heavy chain 1 [Mus musculus]                                                    | 1752.8304 | 37.94  | 2.409300936 |
| 31982178 | FVEGLPINDFSR             |                  | malate dehydrogenase 1, NAD (soluble) [Mus musculus]                                                 | 1393.7274 | 70.08  | 1.442341021 |
| 21704144 | FVIGGPQGDAGLTGR          |                  | methionine adenosyltransferase II, alpha [Mus musculus]                                              | 1444.7627 | 61.19  | 1.548254258 |
| 6681157  | FVINYDYPNSEDYIHR         |                  | DEAD (Asp-Glu-Ala-Asp) box polypeptide 5 [Mus musculus]                                              | 2132.0095 | 32     | 0.903459032 |
| 40068493 | FVINYDYPNSEDYVHR         |                  | DEAD box polypeptide 17 isoform 1 [Mus musculus]                                                     | 2117.9546 | 24.86  | 1.251448992 |
| 6679687  | FVMQEFSR                 |                  | glucose regulated protein [Mus musculus]                                                             | 1172.545  | 35.13  | 0.747962885 |
| 6679753  | FVNVVPTFGK               |                  | Finkel-Biskis-Reilly murine sarcoma virus (FBR-MuSV) ubiquitously expressed (fox derived) [Mus musc  | 1107.6125 | 40.86  | 0.938618931 |
| 7305395  | FVSILMESIPLPDR           |                  | purine-nucleoside phosphorylase [Mus musculus]                                                       | 1616.8728 | 20.94  | 1.598791641 |
| 6680606  | FVTSSSGSYGGVR            |                  | keratin complex 1, acidic, gene 19 [Mus musculus]                                                    | 1303.634  | 81.69  | 1.335563412 |
| 6754036  | FVTVQTIISGTGALR          |                  | glutamate oxaloacetate transaminase 2, mitochondrial [Mus musculus]                                  | 1449.8121 | 45.36  | 1.254472781 |
| 33859604 | FVVDLSDQVAPTIDIEGMR      |                  | proteasome (prosome, macropain) 26S subunit, ATPase 2 [Mus musculus]                                 | 2121.0352 | 21.83  | 0.822269183 |
| 6678097  | FYEALEELDFQGATEESR       |                  | serine (or cysteine) proteinase inhibitor, clade B, member 6a [Mus musculus]                         | 2263.0056 | 41.15  | 1.38257208  |
| 54287684 | FYEQMNGPVTSGSR           |                  | eukaryotic translation elongation factor 1 delta isoform b [Mus musculus]                            | 1572.7172 | 59.26  | 1.074174177 |
| 6755002  | FYNELTEILVR              |                  | programmed cell death 6 interacting protein [Mus musculus]                                           | 1396.7485 | 20.55  | 1.357076761 |
| 6678571  | FYPEDVAEELIQDITQK        |                  | villin 2 [Mus musculus]                                                                              | 2038.0043 | 76.23  | 1.379878013 |
| 6754750  | FYPEDVSEELIQDITQR        |                  | moesin [Mus musculus]                                                                                | 2082.0049 | 46.74  | 0.974004757 |
| 22122523 | FYQASTSELYGK             |                  | GDP-mannose 4, 6-dehydratase [Mus musculus]                                                          | 1393.6583 | 83.87  | 1.396769707 |
| 33563266 | FYSVNVDYSK               |                  | NADH dehydrogenase (ubiquinone) 1 alpha subcomplex, 4 [Mus musculus]                                 | 1221.5798 | 42.45  | 1.466887885 |
| 6679937  | GAAQNIIPASTGAAK          |                  | similar to glyceraldehyde-3-phosphate dehydrogenase [Mus musculus]                                   | 1369.7411 | 111.31 | 1.038328955 |
| 40549395 | GADVNAAPPVPSR            |                  | ankyrin repeat domain protein 17 isoform b [Mus musculus]                                            | 1266.6455 | 24.49  | 1.128293493 |
| 20806532 | GAEAAVNTGPDGVPVEGSR      |                  | cold shock domain protein A short isoform [Mus musculus]                                             | 1782.8628 | 56.47  | 1.189632686 |
| 6756033  | GAEAAVNTGPGGVPVQGSK      |                  | nuclease sensitive element binding protein 1 [Mus musculus]                                          | 1695.8605 | 108.08 | 0.912842716 |
| 55741460 | GAEEMETVIPDVMR           |                  | DJ-1 protein [Mus musculus]                                                                          | 1675.7985 | 73.93  | 1.304630089 |
| 47059123 | GAGVTLNVLEMTADDLENALK    |                  | UDP glucuronosyltransferase 1 family, polypeptide A10 [Mus musculus]                                 | 2174.1035 | 49.43  | 1.507453838 |
| 29293809 | GAIVPAQEVPPPTVPMDSWAR    |                  | ATP citrate lyase [Mus musculus]                                                                     | 2381.189  | 36.97  | 1.271264629 |

|          |                               |                  |                                                                                                      |           |        |             |
|----------|-------------------------------|------------------|------------------------------------------------------------------------------------------------------|-----------|--------|-------------|
| 6671700  | GATQQLDEAER                   |                  | chaperonin subunit 2 (beta) [Mus musculus]                                                           | 1330.6564 | 20.36  | 0           |
| 26080429 | GAVEAAHQAPGWGAQSPR            |                  | aldehyde dehydrogenase 16 family, member A1 [Mus musculus]                                           | 1860.9064 | 21.59  | 0.802194947 |
| 7242197  | GAVYSFDPVGSYQR                |                  | proteasome (prosome, macropain) subunit, beta type 1 [Mus musculus]                                  | 1545.7402 | 46.37  | 1.01320851  |
| 10946928 | GAYGGGYGGYDDYNGYNDGYGFGSDR    |                  | heterogeneous nuclear ribonucleoprotein H1 [Mus musculus]                                            | 2717.0603 | 22.65  | 1.980426489 |
| 6679715  | GDATEVSYEDPPTAK               |                  | Ewing sarcoma breakpoint region 1 [Mus musculus]                                                     | 1450.6627 | 62.51  | 0.82297465  |
| 21644581 | GDDDFVFNPTLLLEFLSDR           |                  | UDP-GlcNAc:betaGal beta-1,3-N-acetylglucosaminyltransferase 7 [Mus musculus]                         | 2166.0388 | 87.37  | 0.716375915 |
| 31543113 | GDEEGIPAVVIDMSGLR             |                  | lymphocyte cytosolic protein 1 [Mus musculus]                                                        | 1757.8728 | 41.35  | 0.55860982  |
| 6753484  | GDEGEVGDGEDNNDISPR            |                  | procollagen, type VI, alpha 1 [Mus musculus]                                                         | 1971.8282 | 61.71  | 0           |
| 6754206  | GDFIALDLGSSSFR                |                  | hexokinase 1 [Mus musculus]                                                                          | 1454.7338 | 32.72  | 1.641920278 |
| 45597447 | GDGPVQGTIHFEQK                |                  | superoxide dismutase 1, soluble [Mus musculus]                                                       | 1512.7463 | 60.9   | 1.028423979 |
| 30348966 | GDQVSNQGLPAEQGSPR             |                  | spectrin beta 2 isoform 1 [Mus musculus]                                                             | 1739.8307 | 128.7  | 1.268948013 |
| 7106421  | GDQVSNQGLPAEQGSPR             |                  | spectrin beta 2 isoform 2 [Mus musculus]                                                             | 1739.8307 | 128.7  | 1.268948013 |
| 30348966 | GDQVSNQGLPAEQGSPR             | Deamidation (NQ) | spectrin beta 2 isoform 1 [Mus musculus]                                                             | 1740.8147 | 42.77  | 1.236217008 |
| 7106421  | GDQVSNQGLPAEQGSPR             | Deamidation (NQ) | spectrin beta 2 isoform 2 [Mus musculus]                                                             | 1740.8147 | 42.77  | 1.236217008 |
| 25141233 | GDTDQASNILASFGLSAR            |                  | matrin 3 [Mus musculus]                                                                              | 1822.8937 | 25.79  | 1.642348236 |
| 63650187 | GDVAEGDLIEHFSQFSAVEK          |                  | PREDICTED: similar to heterogeneous nuclear ribonucleoprotein A0 [Mus musculus]                      | 2148.022  | 22.67  | 1.133827262 |
| 31981562 | GDYPLEAVR                     |                  | pyruvate kinase 3 [Mus musculus]                                                                     | 1019.5198 | 25.55  | 1.13505513  |
| 63660302 | GEAGIPAEFSIWTR                |                  | PREDICTED: filamin B, beta [Mus musculus]                                                            | 1533.775  | 49.23  | 1.078039298 |
| 63618830 | GEELLSPLNLEQAAAYR             |                  | PREDICTED: similar to nuclear myosin I beta [Mus musculus]                                           | 1873.9717 | 47.07  | 0.849876046 |
| 45504394 | GEFFNELVGGQR                  |                  | integrin beta 1 (fibronectin receptor beta) [Mus musculus]                                           | 1423.702  | 33.19  | 1.374690669 |
| 31982178 | GEFITTVQQR                    |                  | malate dehydrogenase 1, NAD (soluble) [Mus musculus]                                                 | 1178.6183 | 49.48  | 1.165447728 |
| 29336026 | GELEDTLDSTNAQQELR             |                  | nonmuscle myosin heavy chain [Mus musculus]                                                          | 1918.9038 | 92.56  | 1.5960585   |
| 63738313 | GEYDVTVPR                     |                  | PREDICTED: similar to AHNAK [Mus musculus]                                                           | 1035.5103 | 35.72  | 1.887040739 |
| 8393544  | GFAFVQYVNER                   |                  | heterogeneous nuclear ribonucleoprotein C [Mus musculus]                                             | 1329.6699 | 25.08  | 0           |
| 21592285 | GFEVQVTELR                    |                  | keratin 20 [Mus musculus]                                                                            | 1177.6293 | 38.92  | 1.124959355 |
| 63641940 | GFFDPNTEENLTYLQLK             |                  | PREDICTED: desmoplakin [Mus musculus]                                                                | 2028.9967 | 23.19  | 0           |
| 31560449 | GFFELFPSVSR                   |                  | aspartyl aminopeptidase [Mus musculus]                                                               | 1285.6633 | 33.23  | 1.043250205 |
| 7949053  | GFGDGYNGYGGGPGGNGFGGSPGYGGGR  |                  | heterogeneous nuclear ribonucleoprotein A2/B1 isoform 1 [Mus musculus]                               | 2495.0386 | 171.8  | 1.193434274 |
| 7949053  | GFGDGYNGYGGGPGGNGFGGSPGYGGGR  | Deamidation (NQ) | heterogeneous nuclear ribonucleoprotein A2/B1 isoform 1 [Mus musculus]                               | 2496.0388 | 98.96  | 1.313036022 |
| 6681069  | GFGFGQGAGALVHSE               |                  | cysteine and glycine-rich protein 1 [Mus musculus]                                                   | 1433.6837 | 104.95 | 1.347135824 |
| 7949053  | GFGFVTFDDHDPVDK               |                  | heterogeneous nuclear ribonucleoprotein A2/B1 isoform 1 [Mus musculus]                               | 1695.7751 | 84.23  | 1.044886476 |
| 6680027  | GFIGPGIDVPAPDMSTGER           |                  | glutamate dehydrogenase 1 [Mus musculus]                                                             | 1915.9222 | 55.92  | 0.875978859 |
| 6679687  | GFPTIYFSPANK                  |                  | glucose regulated protein [Mus musculus]                                                             | 1341.6835 | 28.5   | 0.781509114 |
| 6754508  | GFSVVAADTPELQR                |                  | LIM and SH3 protein 1 [Mus musculus]                                                                 | 1418.7352 | 47.85  | 2.671873319 |
| 15617203 | GFTIPEAFR                     |                  | chloride intracellular channel 1 [Mus musculus]                                                      | 1037.5431 | 31.97  | 1.08930735  |
| 24418933 | GGENIYPAELEDFFLK              |                  | hypothetical protein LOC264895 [Mus musculus]                                                        | 1841.8954 | 84.6   | 1.02222598  |
| 6755252  | GGGGGGGGPGGEQETQELASK         |                  | purine rich element binding protein B [Mus musculus]                                                 | 1829.8287 | 85.13  | 1.377589699 |
| 1346343  | GGGGGGYSGGSSYSGGGSYSGGGGGGGGR |                  | Keratin, type II cytoskeletal 1 (Cytokeratin 1) (K1) (CK 1) (67 kDa cyto keratin) (Hair alpha protei | 2383.9514 | 236.56 | 0           |
| 7949053  | GGGGNFGPGPGSNFR               |                  | heterogeneous nuclear ribonucleoprotein A2/B1 isoform 1 [Mus musculus]                               | 1377.6337 | 83.78  | 0.808168945 |
| 6680572  | GGGSFVQNNQPVGLR               |                  | kinesin family member 5B [Mus musculus]                                                              | 1529.7825 | 30.24  | 3.053924531 |
| 34328400 | GGPPFAFVEFEDPR                |                  | splicing factor, arginine/serine-rich 1 (ASF/SF2) [Mus musculus]                                     | 1564.7428 | 44.13  | 0.907339825 |
| 6680606  | GGSFSGTLAVSDGLLSGNEK          |                  | keratin complex 1, acidic, gene 19 [Mus musculus]                                                    | 1895.9351 | 76.43  | 7.376757402 |
| 453155   | GGSGGSYGGGSGGGYGGGSGSR        |                  | keratin 9 [Homo sapiens]                                                                             | 1791.7382 | 26.91  | 0           |
| 28478945 | GGTPPQQQQQQQPGASPPAAPGPK      |                  | PREDICTED: glutaminase [Mus musculus]                                                                | 2608.3079 | 34.98  | 1.771823004 |
| 24418933 | GGVIAGSPAPPELLIR              |                  | hypothetical protein LOC264895 [Mus musculus]                                                        | 1433.8092 | 20.79  | 1.070016505 |
| 29789343 | GHPSAGAEIEEGSDGSAEAEPR        |                  | eukaryotic translation initiation factor 3, subunit 9 [Mus musculus]                                 | 2167.9194 | 84.26  | 1.085670795 |
| 13385310 | GHQDVEAAQAEYVEK               |                  | propionyl Coenzyme A carboxylase, beta polypeptide [Mus musculus]                                    | 1673.7473 | 69.36  | 0.998153478 |
| 22165384 | GHYTEGAELVDSVLDVVR            |                  | tubulin, beta, 2 [Mus musculus]                                                                      | 1958.9857 | 73.61  | 1.051164837 |
| 12963615 | GHYTEGAELVDSVLDVVR            |                  | tubulin, beta 3 [Mus musculus]                                                                       | 1958.9857 | 73.61  | 1.051164837 |
| 7106439  | GHYTEGAELVDSVLDVVR            |                  | tubulin, beta 5 [Mus musculus]                                                                       | 1958.9857 | 73.61  | 1.051164837 |
| 27754056 | GHYTEGAELVDSVLDVVR            |                  | tubulin, beta 6 [Mus musculus]                                                                       | 1958.9857 | 73.61  | 1.051164837 |
| 21746161 | GHYTEGAELVDSVLDVVR            |                  | tubulin, beta [Mus musculus]                                                                         | 1958.9857 | 73.61  | 1.051164837 |
| 21313520 | GIADVPEWFR                    |                  | acetoacetyl-CoA synthetase [Mus musculus]                                                            | 1189.6135 | 22.64  | 0.730787665 |
| 21313262 | GIEQAVQSHAVAEIEAR             |                  | inner membrane protein, mitochondrial [Mus musculus]                                                 | 1823.8839 | 61.05  | 0           |
| 38142460 | GIHVEIPGAQAESLGPLQVAR         |                  | electron transferring flavoprotein, beta polypeptide [Mus musculus]                                  | 2142.1567 | 37.21  | 1.830574375 |
| 21450291 | GILAADESVMGTMGNR              |                  | aldolase 2, B isoform [Mus musculus]                                                                 | 1490.7319 | 21.95  | 0.544334124 |
| 63518159 | GILFVGSVSGGEEGAR              |                  | PREDICTED: phosphogluconate dehydrogenase [Mus musculus]                                             | 1591.8168 | 63.48  | 1.607147579 |
| 30023842 | GILLYGPPGTGK                  |                  | valosin containing protein [Mus musculus]                                                            | 1172.6627 | 26.14  | 0           |
| 31543942 | GILSGTSDLLTFDEAEVR            |                  | vinculin [Mus musculus]                                                                              | 2036.0504 | 36.33  | 0           |
| 6679457  | GINQQQVWIGGR                  |                  | proteoglycan 2, bone marrow [Mus musculus]                                                           | 1284.6862 | 43.75  | 0.734901094 |

|          |                                  |                    |                                                                                                     |           |        |             |
|----------|----------------------------------|--------------------|-----------------------------------------------------------------------------------------------------|-----------|--------|-------------|
| 6679457  | GINQGGVWIGGR                     | 2 Deamidation (NQ) | proteoglycan 2, bone marrow [Mus musculus]                                                          | 1286.6733 | 21.74  | 0           |
| 27754190 | GIPERLINACVENTLR                 | 2 Deamidation (NQ) | ATP-binding cassette, sub-family A (ABC1), member 3 [Mus musculus]                                  | 1799.9225 | 24.85  | 0           |
| 16716471 | GIQEAQVQLQK                      |                    | hypothetical protein LOC94184 [Mus musculus]                                                        | 1241.6775 | 52.03  | 1.294319805 |
| 11230802 | GISQEQMQEER                      |                    | actinin alpha 4 [Mus musculus]                                                                      | 1352.634  | 52.79  | 1.479181254 |
| 51592084 | GIVEESVTGVHR                     |                    | hypothetical protein LOC74340 [Mus musculus]                                                        | 1282.6744 | 33.75  | 2.700105874 |
| 23956084 | GIVNEQFLLQR                      |                    | acyl-Coenzyme A dehydrogenase, very long chain [Mus musculus]                                       | 1316.7382 | 35.87  | 1.841239137 |
| 20149756 | GIYAYGFEPKPSAIQQR                |                    | DEAD (Asp-Glu-Ala-Asp) box polypeptide 48 [Mus musculus]                                            | 1827.946  | 31.6   | 1.228236743 |
| 21450625 | GIYAYGFEPKPSAIQQR                |                    | eukaryotic translation initiation factor 4A1 [Mus musculus]                                         | 1827.946  | 31.6   | 1.228236743 |
| 36031080 | GLDGFQGGPSGPR                    |                    | procollagen, type IV, alpha 2 [Mus musculus]                                                        | 1187.5892 | 43.71  | 1.075484779 |
| 10946870 | GLEVTAYSPLGSSDR                  |                    | aldo-keto reductase family 1, member A4 (aldehyde reductase) [Mus musculus]                         | 1551.7825 | 37.38  | 1.306230527 |
| 6755863  | GLFDEYGSK                        |                    | tumor rejection antigen gp96 [Mus musculus]                                                         | 1015.4708 | 38.26  | 0.899738371 |
| 7304889  | GLGTDEDAIIGILAYR                 |                    | annexin A4 [Mus musculus]                                                                           | 1676.886  | 54.04  | 1.192846971 |
| 6753060  | GLGTDEDSILNLLTSR                 |                    | annexin A5 [Mus musculus]                                                                           | 1703.8806 | 83.74  | 1.05322582  |
| 6996913  | GLGTDEDSLIEICSR                  |                    | annexin A2 [Mus musculus]                                                                           | 1720.8495 | 21.52  | 1.20910684  |
| 6678329  | GLLIEPAANSYLLAER                 |                    | transglutaminase 2, C polypeptide [Mus musculus]                                                    | 1729.9521 | 38.19  | 1.270298656 |
| 31981826 | GLLPEELTPLILETQK                 |                    | electron transferring flavoprotein, alpha polypeptide [Mus musculus]                                | 1794.0292 | 41.2   | 1.502405125 |
| 13386034 | GLSQSALPYR                       |                    | ribosomal protein S13 [Mus musculus]                                                                | 1091.5844 | 26.16  | 0.612800149 |
| 63746482 | GLVEPVDVVDNADGTQTVNYVPSR         |                    | PREDICTED: filamin, alpha [Mus musculus]                                                            | 2544.259  | 118.45 | 1.2134544   |
| 13386272 | GLVYETSVLDPDEGIR                 |                    | citrate synthase-like protein [Mus musculus]                                                        | 1762.8884 | 56.46  | 1.712409791 |
| 13385942 | GLVYETSVLDPDEGIR                 |                    | citrate synthase [Mus musculus]                                                                     | 1762.8884 | 56.46  | 1.712409791 |
| 6680748  | GMSLNLEPDNVGVVFGNDK              |                    | ATP synthase, H+ transporting, mitochondrial F1 complex, alpha subunit, isoform 1 [Mus musculus]    | 2104.0454 | 74.23  | 1.17366396  |
| 31560611 | GMTVYGLPR                        |                    | calponin 1 [Mus musculus]                                                                           | 993.5211  | 39.96  | 1.621639751 |
| 30911099 | GNAGQNTYGFANSTMER                |                    | fatty acid synthase [Mus musculus]                                                                  | 1817.7938 | 66.49  | 0.818458265 |
| 33859580 | GNDVAFHFNPR                      |                    | galectin-3 [Mus musculus]                                                                           | 1273.6123 | 53.56  | 1.092366962 |
| 21313308 | GNFGGSFAGSFGGAGGHAPGVAR          |                    | heterogeneous nuclear ribonucleoprotein M [Mus musculus]                                            | 2034.9509 | 46.06  | 1.013839958 |
| 51770896 | GNPTVEVDLYTAK                    |                    | PREDICTED: similar to Alpha enolase (2-phospho-D-glycerate hydro-lyase) (Non-neural enolase) (NNE)  | 1406.7096 | 69.11  | 1.103958714 |
| 13385994 | GNSIIMLEALER                     |                    | small nuclear ribonucleoprotein polypeptide G [Mus musculus]                                        | 1345.7219 | 22.27  | 0           |
| 19527034 | GPAPLGTGFQVTTTQQR                |                    | lamin B receptor [Mus musculus]                                                                     | 1569.8434 | 32.94  | 0.776782008 |
| 6755204  | GPLYVVDSEGNR                     |                    | proteasome (prosome, macropain) subunit, beta type 5 [Mus musculus]                                 | 1426.6672 | 41.05  | 1.514782003 |
| 6671497  | GPQVPAGEPTQEASGATATK             |                    | ATP-binding cassette, sub-family D, member 1 [Mus musculus]                                         | 1896.9236 | 20.72  | 1.51592329  |
| 13626040 | GPSEAPQEAEEGATSDGEK              |                    | A kinase (PRKA) anchor protein (gravin) 12 [Mus musculus]                                           | 2088.8928 | 75.82  | 1.623085504 |
| 7305029  | GPSSQEDESGLLEDSR                 |                    | erythrocyte protein band 4.1-like 1 isoform a [Mus musculus]                                        | 1861.7887 | 20.07  | 0           |
| 33859600 | GPTQLVSPPEVEYIVR                 |                    | protein phosphatase 1B, magnesium dependent, beta isoform [Mus musculus]                            | 2042.0505 | 29.82  | 1.016449491 |
| 29293809 | GQELIYAGMPITEVFK                 |                    | ATP citrate lyase [Mus musculus]                                                                    | 1795.9281 | 28.3   | 2.166156308 |
| 13386370 | GQGAAAQQGGYIEPAR                 |                    | kinesin-like 8 [Mus musculus]                                                                       | 1644.8109 | 48.3   | 1.051562771 |
| 6677871  | GQIITYWQGANATR                   |                    | scinderin [Mus musculus]                                                                            | 1578.8054 | 49.99  | 0.899832364 |
| 6755698  | GQNDLMGTAEDFADQFLR               |                    | surfeit gene 4 [Mus musculus]                                                                       | 2027.9246 | 28.06  | 1.577280761 |
| 6754090  | GSAPPGVPEGQIR                    |                    | glutathione S-transferase omega 1 [Mus musculus]                                                    | 1361.7196 | 54.01  | 1.465935118 |
| 27532959 | GSASSALETEELATAEAVR              |                    | aldehyde dehydrogenase 1 family, member L1 [Mus musculus]                                           | 2134.0449 | 68.43  | 1.46507067  |
| 16716467 | GSDHSASLEPGELAEVLR               |                    | N-acetylneuraminic acid synthase (sialic acid synthase) [Mus musculus]                              | 1866.9215 | 103.62 | 1.089187116 |
| 29788989 | GSESSKPWPDATTYGAGSASR            |                    | thyroid hormone receptor associated protein 3 [Mus musculus]                                        | 2111.9639 | 47.85  | 1.187743748 |
| 5477749  | GSLGGGFSSGGFSGGSFSR              |                    | Keratin, type I cytoskeletal 10 (Cytokeratin 10) (K10) (CK 10)                                      | 1707.7786 | 45.83  | 0           |
| 6678573  | GSLNITTPGIQIWR                   |                    | villin 1 [Mus musculus]                                                                             | 1555.8646 | 42.7   | 1.320826379 |
| 21704156 | GSVFSAPSASGTPNK                  |                    | caldesmon 1 [Mus musculus]                                                                          | 1406.6823 | 48.38  | 0.573064671 |
| 6678449  | GSVNMPPFMDFLTQK                  |                    | thiosulfate sulfurtransferase, mitochondrial [Mus musculus]                                         | 1486.7133 | 33.35  | 1.672280284 |
| 1346343  | GSYSGSGSSYSGSGGGGGHGSYSGSSSSGGYR |                    | Keratin, type II cytoskeletal 1 (Cytokeratin 1) (K1) (CK 1) (67 kDa cytokeratin) (Hair alpha protei | 3312.3149 | 71.29  | 0           |
| 7657429  | GSYTYFAPSNEAWENLSDIR             |                    | osteoblast specific factor 2 (fasciclin I-like) [Mus musculus]                                      | 2435.0852 | 44.36  | 0.936067982 |
| 6679761  | GTGELTQLLNSMLTAK                 |                    | fructose bisphosphatase 2 [Mus musculus]                                                            | 1789.9752 | 46.11  | 1.058780882 |
| 6753428  | GTGGVDTAATGVSFVDSLDR             |                    | creatine kinase, mitochondrial 1, ubiquitous [Mus musculus]                                         | 2052.9868 | 104.76 | 1.68819706  |
| 10946574 | GTGGVDTAAVGGVFDVSNADR            |                    | creatine kinase, brain [Mus musculus]                                                               | 1964.9357 | 64.8   | 1.825752257 |
| 7304887  | GTGTDEDALIEILTR                  |                    | annexin A3 [Mus musculus]                                                                           | 1704.87   | 51.73  | 1.523881396 |
| 31560449 | GTPEPGPLGATDER                   |                    | aspartyl aminopeptidase [Mus musculus]                                                              | 1396.6735 | 45.7   | 1.387238116 |
| 29789343 | GTQGVVTFEIFR                     |                    | eukaryotic translation initiation factor 3, subunit 9 [Mus musculus]                                | 1467.7659 | 21.04  | 1.527751704 |
| 31981826 | GTSFEAAATSGGSASSEK               |                    | electron transferring flavoprotein, alpha polypeptide [Mus musculus]                                | 1644.729  | 52.44  | 1.916081462 |
| 6678097  | GTTASQMAQALALDK                  |                    | serine (or cysteine) proteinase inhibitor, clade B, member 6a [Mus musculus]                        | 1505.7518 | 47.07  | 0           |
| 31652266 | GTVAAAASGAAGGGGGAGAGAPGGGR       |                    | hypothetical protein LOC229543 [Mus musculus]                                                       | 1939.9366 | 30.33  | 1.879132185 |
| 40254595 | GTVVYGEPIASLTDGSHYWSK            |                    | dihydropyrimidinase-like 2 [Mus musculus]                                                           | 2425.1619 | 39.87  | 0           |
| 19526818 | GVAPLWMR                         |                    | solute carrier family 25 (mitochondrial carrier, phosphate carrier), member 3 [Mus musculus]        | 929.5115  | 28.17  | 1.055520922 |
| 23956222 | GVDDLDFIGDEAIEKPYATK             |                    | ARP3 actin-related protein 3 homolog [Mus musculus]                                                 | 2444.1824 | 31.76  | 0           |
| 6996913  | GVDEVTIVNLTNR                    |                    | annexin A2 [Mus musculus]                                                                           | 1542.8517 | 93.25  | 1.157719377 |



|          |                          |                                    |                                                                                                  |           |        |             |
|----------|--------------------------|------------------------------------|--------------------------------------------------------------------------------------------------|-----------|--------|-------------|
| 13385374 | GVDLTEPAQPAR             |                                    | RAB5A, member RAS oncogene family [Mus musculus]                                                 | 1253.6515 | 35.28  | 1.650250245 |
| 21450277 | GVGISEGNETVEDIAAR        |                                    | Na+/K+ -ATPase alpha 1 subunit [Mus musculus]                                                    | 1829.9209 | 76.85  | 1.077743651 |
| 31981562 | GVNLPGAADVLPVSEK         |                                    | pyruvate kinase 3 [Mus musculus]                                                                 | 1636.8888 | 56.75  | 1.122502775 |
| 33859482 | GVQYLNEIK                |                                    | eukaryotic translation elongation factor 2 [Mus musculus]                                        | 1063.5758 | 31.79  | 1.000401484 |
| 6753514  | GVTLPPELYQDPAYQR         |                                    | carnitine palmitoyltransferase 2 [Mus musculus]                                                  | 1749.8782 | 33.36  | 0           |
| 6755863  | GVVDSDDLPLNVSR           |                                    | tumor rejection antigen gp96 [Mus musculus]                                                      | 1485.7598 | 49.2   | 0.960776483 |
| 6754254  | GVVDSDELPLNISR           |                                    | heat shock protein 1, alpha [Mus musculus]                                                       | 1513.7906 | 74.66  | 1.112763939 |
| 40556608 | GVVDSDELPLNISR           |                                    | heat shock protein 1, beta [Mus musculus]                                                        | 1513.7906 | 74.66  | 1.112763939 |
| 6671539  | GVVPLAGTNGETTQGLDGLSER   |                                    | aldolase 1, A isoform [Mus musculus]                                                             | 2272.146  | 132.53 | 0.93950316  |
| 6671539  | GVVPLAGTNGETTQGLDGLSER   | Deamidation (NQ)                   | aldolase 1, A isoform [Mus musculus]                                                             | 2273.1255 | 91.95  | 1.135503018 |
| 6753428  | GWEFMMWNER               |                                    | creatine kinase, mitochondrial 1, ubiquitous [Mus musculus]                                      | 1254.5452 | 34.38  | 1.881365225 |
| 6753010  | GWGDQLIWTQTYEALYR        |                                    | anterior gradient 2 [Mus musculus]                                                               | 2229.0657 | 27.7   | 0.908368976 |
| 22122825 | GYAFNHSADEFETVR          |                                    | actin-related protein 2 [Mus musculus]                                                           | 1613.739  | 47.92  | 0.859027714 |
| 7305085  | GYDVFPPR                 |                                    | glutamine fructose-6-phosphate transaminase 1 [Mus musculus]                                     | 968.4468  | 49.7   | 1.075627158 |
| 21450625 | GYDVIAQAQSGTGK           |                                    | eukaryotic translation initiation factor 4A1 [Mus musculus]                                      | 1394.6906 | 73.01  | 0.816552719 |
| 59709449 | GYEEWLLNEIR              |                                    | actinin alpha 2 [Mus musculus]                                                                   | 1421.7108 | 50.69  | 1.087345737 |
| 11230802 | GYEEWLLNEIR              |                                    | actinin alpha 4 [Mus musculus]                                                                   | 1421.7108 | 50.69  | 1.087345737 |
| 63487095 | GYELLFQPEVVR             |                                    | PREDICTED: catenin src [Mus musculus]                                                            | 1449.7759 | 55.38  | 1.040022244 |
| 37537522 | GYFDEDMNSILADPGDDTK      |                                    | epioplakin 1 [Mus musculus]                                                                      | 2102.8904 | 22.17  | 0.814408411 |
| 41322904 | GYFDEEMNR                |                                    | plectin 1 isoform 1 [Mus musculus]                                                               | 1160.4725 | 32.01  | 1.172439765 |
| 7949051  | GYFEYIEENK               |                                    | heterogenous nuclear ribonucleoprotein U [Mus musculus]                                          | 1291.5984 | 58.33  | 0.764247046 |
| 6753036  | GYFIQPTVFGDVK            |                                    | aldehyde dehydrogenase 2, mitochondrial [Mus musculus]                                           | 1470.7625 | 61.42  | 1.739603375 |
| 6681069  | GYGYGQAGTLSTDK           |                                    | cysteine and glycine-rich protein 1 [Mus musculus]                                               | 1474.6831 | 76.33  | 1.531059625 |
| 6681069  | GYGYGQAGTLSTDKGESLGK     |                                    | cysteine and glycine-rich protein 1 [Mus musculus]                                               | 2159.0579 | 190.09 | 1.81932098  |
| 30425250 | GYNFTTTAER               | Deamidation (NQ)                   | hypothetical protein LOC238880 [Mus musculus]                                                    | 1160.528  | 27.19  | 1.203834162 |
| 16716467 | GYPPEDIFNLAGK            |                                    | N-acetylneuraminic acid synthase (sialic acid synthase) [Mus musculus]                           | 1420.7096 | 53.02  | 1.231608303 |
| 45598381 | GYPTLLLFR                |                                    | thioredoxin domain containing 5 [Mus musculus]                                                   | 1079.6311 | 26.43  | 0.931227708 |
| 6671509  | GYSFTTTAER               |                                    | actin, beta, cytoplasmic [Mus musculus]                                                          | 1132.5355 | 58.92  | 1.192022894 |
| 63652452 | GYSFTTTAER               |                                    | PREDICTED: similar to cytoplasmic beta-actin [Mus musculus]                                      | 1132.5355 | 58.92  | 1.192022894 |
| 6671507  | GYSFVTTAER               |                                    | actin, alpha 2, smooth muscle, aorta [Mus musculus]                                              | 1130.5548 | 56.34  | 1.18909026  |
| 31981549 | GYWGGPAFLR               |                                    | sulfide quinone reductase-like [Mus musculus]                                                    | 1123.5765 | 23.75  | 1.483551768 |
| 63738313 | HEVTEISNTDVETQPGK        |                                    | PREDICTED: similar to AHNAK [Mus musculus]                                                       | 1883.8977 | 50.66  | 0           |
| 6680027  | HGGTIPVVPTAEFQDR         |                                    | glutamate dehydrogenase 1 [Mus musculus]                                                         | 1723.8816 | 57.74  | 1.084828038 |
| 63702717 | HGQWPQSSNEMVK            | Deamidation (NQ);<br>Oxidation (M) | PREDICTED: hypothetical protein XP_619435 [Mus musculus]                                         | 1544.6976 | 29.26  | 1.104048556 |
| 22122825 | HIVLSGGSTMYPGLPSR        |                                    | actin-related protein 2 [Mus musculus]                                                           | 1771.926  | 28.51  | 0.486960181 |
| 6753010  | HLSPDGQYVPR              |                                    | anterior gradient 2 [Mus musculus]                                                               | 1268.6389 | 48.24  | 2.362692806 |
| 58037267 | HQSLGGQYGVQGFPTIK        |                                    | protein disulfide isomerase-associated 6 [Mus musculus]                                          | 1816.9314 | 29.34  | 0           |
| 10946928 | HTGPNSPDTANDGFVR         |                                    | heterogeneous nuclear ribonucleoprotein H1 [Mus musculus]                                        | 1684.7762 | 62.95  | 2.667360544 |
| 9845253  | HTGPNSPDTANDGFVR         |                                    | heterogeneous nuclear ribonucleoprotein H2 [Mus musculus]                                        | 1684.7762 | 62.95  | 2.667360544 |
| 7305295  | HTQAVEELTEQLEQFK         |                                    | myosin, heavy polypeptide 11, smooth muscle [Mus musculus]                                       | 1929.953  | 59.72  | 2.386937562 |
| 27229048 | HVSPAGAAVGVPLSEDEAR      |                                    | 5-aminimidazole-4-carboxamide ribonucleotide formyltransferase/IMP cyclohydrolase [Mus musculus] | 1861.9347 | 37.4   | 0.803335167 |
| 63487095 | HYEDGYPGGSDNYGSLSR       |                                    | PREDICTED: catenin src [Mus musculus]                                                            | 1973.8278 | 107.33 | 1.506436468 |
| 6755142  | HYGPGWVSMANAGK           |                                    | peptidylprolyl isomerase B [Mus musculus]                                                        | 1474.6782 | 22.81  | 0           |
| 21450129 | IAAFADAADVPIDFPLAPAYAVPK |                                    | acetyl-Coenzyme A acetyltransferase 1 precursor [Mus musculus]                                   | 2443.2886 | 40.34  | 0           |
| 6754036  | IAAILTSPDLR              |                                    | glutamate oxaloacetate transaminase 2, mitochondrial [Mus musculus]                              | 1270.7435 | 20.37  | 1.530738504 |
| 6753296  | IAEAGSRMDKLAR            |                                    | catenin alpha 2 isoform 2 [Mus musculus]                                                         | 1417.7407 | 21.42  | 0           |
| 63476037 | IAEGVQLLIVLTAEPSGDDVR    |                                    | PREDICTED: procollagen, type VI, alpha 3 [Mus musculus]                                          | 2292.2395 | 60.78  | 0.71262065  |
| 46909602 | IAGSFLPFLDEDR            |                                    | SAM domain- and HD domain-containing protein 1 [Mus musculus]                                    | 1479.7561 | 27.65  | 0           |
| 6679515  | IAIPGLAGAGNSVLLVSNLNER   |                                    | polypyrimidine tract binding protein 1 [Mus musculus]                                            | 2275.2751 | 43.79  | 1.104019634 |
| 31982522 | IAMQTLDMGR               |                                    | acyl-Coenzyme A dehydrogenase, short chain [Mus musculus]                                        | 1135.561  | 31.6   | 1.624810039 |
| 63746482 | IANLQTDLSGDLR            |                                    | PREDICTED: filamin, alpha [Mus musculus]                                                         | 1415.7562 | 70.92  | 1.45762163  |
| 7305295  | IAQLEEELEEEQGNMEAMSDR    |                                    | myosin, heavy polypeptide 11, smooth muscle [Mus musculus]                                       | 2451.0669 | 108.03 | 1.693000313 |
| 20137006 | IAQLEEQLDNETK            |                                    | myosin, heavy polypeptide 9, non-muscle [Mus musculus]                                           | 1530.7654 | 56.22  | 2.208961596 |
| 7305295  | IAQLEEQVEQEAR            |                                    | myosin, heavy polypeptide 11, smooth muscle [Mus musculus]                                       | 1542.778  | 66.87  | 1.224209286 |
| 41054806 | IAQSDYIPTQQDVLRL         |                                    | guanine nucleotide binding protein, alpha inhibiting 2 [Mus musculus]                            | 1746.9069 | 55.56  | 1.392418274 |
| 6754004  | IATVGYLPTQDVLRL          |                                    | guanine nucleotide binding protein, alpha 11 [Mus musculus]                                      | 1673.924  | 24.71  | 0           |
| 36031080 | IAVQPGTLGPOGR            |                                    | procollagen, type IV, alpha 2 [Mus musculus]                                                     | 1293.7307 | 57.11  | 1.1601278   |
| 23346461 | IDEVEEMLTNNR             |                                    | NADH dehydrogenase (ubiquinone) Fe-S protein 2 [Mus musculus]                                    | 1462.6926 | 50.46  | 1.346760626 |
| 38090003 | IDIDNSGYVSDYELQDLFK      |                                    | PREDICTED: expressed sequence A1427122 [Mus musculus]                                            | 2234.0513 | 48.81  | 2.571546488 |
| 40556608 | IDIIPNQR                 |                                    | heat shock protein 1, beta [Mus musculus]                                                        | 1194.6451 | 43.21  | 0.682245105 |

|          |                         |                                                                                                     |           |        |             |
|----------|-------------------------|-----------------------------------------------------------------------------------------------------|-----------|--------|-------------|
| 31980969 | IDMNLTDLLGELQR          | SEC23B [Mus musculus]                                                                               | 1630.8406 | 28.88  | 0.804207479 |
| 50355692 | IDSLSAQLSQLK            | lamin A isoform A [Mus musculus]                                                                    | 1430.777  | 54.89  | 1.089755216 |
| 9790073  | IDSVTGEIFSAAPLDR        | cadherin 17 [Mus musculus]                                                                          | 1690.8688 | 80.8   | 1.078748261 |
| 7949053  | IDTIEIITDR              | heterogeneous nuclear ribonucleoprotein A2/B1 isoform 1 [Mus musculus]                              | 1188.6644 | 35.46  | 1.166067499 |
| 63562723 | IEDFLER                 | PREDICTED: similar to 40S ribosomal protein S9 [Mus musculus]                                       | 921.4709  | 34.07  | 0.883682952 |
| 63476037 | IEDNVQQFLVLLVAGR        | PREDICTED: procollagen, type VI, alpha 3 [Mus musculus]                                             | 1814.0208 | 28.98  | 0.852649689 |
| 31981100 | IEDVTPIPSDSTR           | ribosomal protein S14 [Mus musculus]                                                                | 1429.7192 | 94.64  | 1.124131131 |
| 63476037 | IEEGVPQFLVLISSGK        | PREDICTED: procollagen, type VI, alpha 3 [Mus musculus]                                             | 1715.9604 | 26.1   | 0           |
| 6680606  | IEELNTQVAHVHSEIQISK     | keratin complex 1, acidic, gene 19 [Mus musculus]                                                   | 2166.1392 | 89.99  | 1.064265763 |
| 30794450 | IEEVEPLPLVVEDK          | ribosomal protein L4 [Mus musculus]                                                                 | 1608.8739 | 26.67  | 0.994544896 |
| 37620153 | IEGYDPPEVWVFK           | myosin, light polypeptide kinase telokin isoform [Mus musculus]                                     | 1578.7852 | 42.18  | 2.175515968 |
| 482387   | IEISELNR                | keratin, 67K type II epidermal - human                                                              | 973.5337  | 41.51  | 0           |
| 1346343  | IEISELNR                | Keratin, type II cytoskeletal 1 (Cytokeratin 1) (K1) (CK 1) (67 kDa cytokeratin) (Hair alpha protei | 973.5337  | 41.51  | 0           |
| 33563270 | IEQLSPFPDLLLLK          | oxoglutarate dehydrogenase (lipoamide) [Mus musculus]                                               | 1659.9344 | 35.68  | 1.698314202 |
| 33563250 | IESLNEEIAFLK            | desmin [Mus musculus]                                                                               | 1405.7612 | 69.88  | 1.671388448 |
| 31559916 | IETIEVMEDR              | heterogeneous nuclear ribonucleoprotein A3 isoform b [Mus musculus]                                 | 1234.6046 | 38.47  | 0.963559026 |
| 63621835 | IETIEVMEDR              | PREDICTED: similar to heterogeneous nuclear ribonucleoprotein A3 [Mus musculus]                     | 1234.6046 | 38.47  | 0.963559026 |
| 21703972 | IETQDIQALR              | malic enzyme 2, NAD(+)-dependent, mitochondrial [Mus musculus]                                      | 1186.6455 | 40.47  | 1.159968577 |
| 31981722 | IEWLESHQDADIEDFK        | heat shock 70kD protein 5 (glucose-regulated protein) [Mus musculus]                                | 1974.9081 | 69.46  | 1.082137844 |
| 46849708 | IFDLQDWSQEDER           | succinate-Coenzyme A ligase, ADP-forming, beta subunit [Mus musculus]                               | 1680.771  | 36.84  | 1.684293829 |
| 31982186 | IFGVTTLDIVR             | malate dehydrogenase 2, NAD (mitochondrial) [Mus musculus]                                          | 1233.7264 | 47.3   | 1.22666984  |
| 31559916 | IFVGGIKEDTEEYNLR        | heterogeneous nuclear ribonucleoprotein A3 isoform b [Mus musculus]                                 | 1882.9541 | 45.3   | 0           |
| 6671602  | IFVGGLSPDTPEEK          | heterogeneous nuclear ribonucleoprotein D [Mus musculus]                                            | 1488.752  | 50.64  | 1.103649699 |
| 22164798 | IFVVDWQR                | selenium binding protein 1 [Mus musculus]                                                           | 1149.5908 | 25.97  | 2.192476541 |
| 7710042  | IFYPETTDIYDR            | IQ motif containing GTPase activating protein 1 [Mus musculus]                                      | 1532.7356 | 21.07  | 0.843954674 |
| 6754012  | IGAGDYQPTEQDILR         | guanine nucleotide binding protein, alpha o [Mus musculus]                                          | 1675.8324 | 39.77  | 1.965212024 |
| 63476037 | IGDLQSQIVSLLK           | PREDICTED: procollagen, type VI, alpha 3 [Mus musculus]                                             | 1413.8275 | 81.34  | 1.036649452 |
| 6671539  | IGEHTPSALAIMENANVLAR    | aldolase 1, A isoform [Mus musculus]                                                                | 2107.105  | 29.18  | 1.037982426 |
| 6754750  | IGFPWSEIR               | moesin [Mus musculus]                                                                               | 1104.5907 | 34.48  | 0.945960401 |
| 6677699  | IGFPWSEIR               | radixin [Mus musculus]                                                                              | 1104.5907 | 34.48  | 0.945960401 |
| 6678571  | IGFPWSEIR               | villin 2 [Mus musculus]                                                                             | 1104.5907 | 34.48  | 0.945960401 |
| 51873060 | IGGIGTVPVGR             | eukaryotic translation elongation factor 1 alpha 1 [Mus musculus]                                   | 1025.6158 | 47.79  | 0.905359513 |
| 51492007 | IGQQPQQPAPPQQDYTK       | KH-type splicing regulatory protein [Mus musculus]                                                  | 1980.9733 | 40.77  | 1.147895492 |
| 6754976  | IGYPAPNFK               | peroxiredoxin 1 [Mus musculus]                                                                      | 1006.5403 | 46.38  | 0           |
| 6678483  | IHVSDQELQSANASVDDSR     | ubiquitin-activating enzyme E1, Chr X [Mus musculus]                                                | 2070.9695 | 101.55 | 1.141117815 |
| 6680027  | IIAEGANGPTTPEADK        | glutamate dehydrogenase 1 [Mus musculus]                                                            | 1583.7928 | 82.38  | 1.058560398 |
| 6680027  | IIAEGANGPTTPEADKIFLER   | glutamate dehydrogenase 1 [Mus musculus]                                                            | 2242.1733 | 46.16  | 3.894495296 |
| 37620153 | IIDEFELTER              | myosin, light polypeptide kinase telokin isoform [Mus musculus]                                     | 1379.678  | 52.17  | 0           |
| 6677813  | IIDVVYNASNELVR          | ribosomal protein S8 [Mus musculus]                                                                 | 1718.9081 | 91.16  | 0.685904564 |
| 31980706 | IIIEAPAPGINPEVR         | methylcrotonoyl-Coenzyme A carboxylase 1 (alpha) [Mus musculus]                                     | 1604.8623 | 22.02  | 0           |
| 63476037 | IIELDVKPDGTR            | PREDICTED: procollagen, type VI, alpha 3 [Mus musculus]                                             | 1484.8004 | 69.6   | 0.802476006 |
| 6679567  | IIGAVDQIQLTQAQLEER      | polymerase I and transcript release factor [Mus musculus]                                           | 2025.1046 | 69.51  | 1.605082554 |
| 20137006 | IIGLDQVAGMSETALPGAFK    | myosin, heavy polypeptide 9, non-muscle [Mus musculus]                                              | 2018.0576 | 92.61  | 1.165040859 |
| 31981722 | IINEPTAAAIAYGLDK        | heat shock 70kD protein 5 (glucose-regulated protein) [Mus musculus]                                | 1659.9058 | 82.61  | 0.846366827 |
| 7305163  | IINEPTAAAIAYGLDK        | heat shock protein 1-like [Mus musculus]                                                            | 1659.9058 | 82.61  | 0.846366827 |
| 31981690 | IINEPTAAAIAYGLDK        | heat shock protein 8 [Mus musculus]                                                                 | 1659.9058 | 82.61  | 0.846366827 |
| 63664182 | IINEPTAAAIAYGLDK        | PREDICTED: similar to heat shock protein 8 [Mus musculus]                                           | 1659.9058 | 82.61  | 0.846366827 |
| 50080209 | IINEPTAAAIAYGLDR        | heat shock protein 1A [Mus musculus]                                                                | 1687.8922 | 28.55  | 2.654485917 |
| 41322904 | IISLETYNLFR             | plectin 1 isoform 1 [Mus musculus]                                                                  | 1368.7562 | 22.65  | 0.886914216 |
| 136429   | IITHPNFNGNTLNDNDIMLIK   | Trypsin precursor                                                                                   | 2283.1838 | 97.54  | 0           |
| 136429   | IITHPNFNGNTLNDNDIMLIK   | Trypsin precursor                                                                                   | 2284.1741 | 62.22  | 0           |
| 136429   | IITHPNFNGNTLNDNDIMLIK   | Trypsin precursor                                                                                   | 2299.1841 | 34.13  | 0.055592593 |
| 13384620 | IITITGTQDQIQNAQYLLQNSVK | heterogeneous nuclear ribonucleoprotein K [Mus musculus]                                            | 2589.3906 | 27.65  | 0           |
| 6680836  | IKDPDAAKPEDWDER         | calreticulin [Mus musculus]                                                                         | 1784.8492 | 87.72  | 0.841519231 |
| 7710042  | IIAIGLINEALDEGDAQK      | IQ motif containing GTPase activating protein 1 [Mus musculus]                                      | 1882.9789 | 42.72  | 2.316616525 |
| 7710042  | IIAIGLINEALDEGDAQK      | IQ motif containing GTPase activating protein 1 [Mus musculus]                                      | 1883.9723 | 25.82  | 0           |
| 6678359  | ILATPPQEDAPSVDIANIR     | transketolase [Mus musculus]                                                                        | 2020.0674 | 89.59  | 1.004101595 |
| 13937395 | ILEQEEEEQAGK            | arsenate resistance protein 2 [Mus musculus]                                                        | 1531.6967 | 36.77  | 2.664795431 |
| 6680748  | ILGADTSVDLEETGR         | ATP synthase, H+ transporting, mitochondrial F1 complex, alpha subunit, isoform 1 [Mus musculus]    | 1575.7894 | 87.31  | 1.125147631 |
| 31982755 | ILLAELEQLK              | vimentin [Mus musculus]                                                                             | 1169.7202 | 58.02  | 0.637279571 |

|          |                         |                                                                                              |           |       |             |
|----------|-------------------------|----------------------------------------------------------------------------------------------|-----------|-------|-------------|
| 6680067  | ILLANFLAQTEALMK         | glucose phosphate isomerase 1 [Mus musculus]                                                 | 1675.948  | 74.79 | 1.512914993 |
| 31981679 | ILQSSSEVGYDAMLGDFVNMVEK | heat shock protein 1 (chaperonin) [Mus musculus]                                             | 2532.2002 | 27.3  | 0.870177904 |
| 16716471 | ILSDTTLWLR              | hypothetical protein LOC94184 [Mus musculus]                                                 | 1217.6973 | 50.07 | 0.960718603 |
| 13384620 | ILSISADIETIGEILK        | heterogeneous nuclear ribonucleoprotein K [Mus musculus]                                     | 1714.9779 | 74.53 | 1.261224214 |
| 6677771  | ILTFDQLALESPK           | ribosomal protein L18 [Mus musculus]                                                         | 1474.8116 | 78.52 | 1.015077557 |
| 34538601 | ILYMMDEINNPVLTVK        | cytochrome c oxidase subunit II [Mus musculus]                                               | 1892.9753 | 27.73 | 1.84748106  |
| 31980648 | IMDPNIVGNEHYDVAR        | ATP synthase, H+ transporting mitochondrial F1 complex, beta subunit [Mus musculus]          | 1842.8873 | 73.23 | 1.013243337 |
| 18152793 | IMEGPAFNFLDAPAVR        | pyruvate dehydrogenase (lipoamide) beta [Mus musculus]                                       | 1747.8894 | 56.95 | 0.929438712 |
| 20137006 | IMGIPEDQMGLLR           | myosin, heavy polypeptide 9, non-muscle [Mus musculus]                                       | 1601.8074 | 53.76 | 1.176191683 |
| 31980648 | IMNVIGEPIDER            | ATP synthase, H+ transporting mitochondrial F1 complex, beta subunit [Mus musculus]          | 1385.7128 | 54.21 | 1.195146437 |
| 6678499  | INAWNSPTLPIYEPGLK       | UDP-glucose dehydrogenase [Mus musculus]                                                     | 1913.0145 | 44.04 | 5.158620927 |
| 6724311  | INEAFDLLR               | alcohol dehydrogenase 1 (class I) [Mus musculus]                                             | 1090.5927 | 44.95 | 1.779550626 |
| 51890205 | INFDDNAEFR              | succinate-Coenzyme A ligase, GDP-forming, beta subunit [Mus musculus]                        | 1240.5618 | 72.38 | 1.19368109  |
| 21704066 | INVNEIFYDLVR            | RAS-related protein-1a [Mus musculus]                                                        | 1494.7902 | 54.09 | 0.643281654 |
| 22165384 | INVYYNEATGGK            | tubulin, beta, 2 [Mus musculus]                                                              | 1328.6663 | 25.74 | 0.844500405 |
| 16716467 | IPAGTTLTLDMLTVK         | N-acetylneuraminic acid synthase (sialic acid synthase) [Mus musculus]                       | 1573.8773 | 44.64 | 0           |
| 22094989 | IPDEFDSDPILVQQLR        | translocase of inner mitochondrial membrane 50 homolog [Mus musculus]                        | 1884.9646 | 63.08 | 0.949594836 |
| 21312062 | IPDQLVILDMK             | transmembrane trafficking protein [Mus musculus]                                             | 1284.718  | 35.43 | 0           |
| 6755368  | IPDWFLNR                | ribosomal protein S18 [Mus musculus]                                                         | 1060.566  | 30.23 | 0.978757895 |
| 31980648 | IPSAVGYQPTLATDMGMQER    | ATP synthase, H+ transporting mitochondrial F1 complex, beta subunit [Mus musculus]          | 2266.0889 | 96.78 | 1.342603381 |
| 9790077  | IQAAAAPPANATAASDTNAGDR  | glycogen synthase kinase 3 beta [Mus musculus]                                               | 2069.9814 | 24.8  | 3.653963094 |
| 20137008 | IQAILEDLLR              | biglycan [Mus musculus]                                                                      | 1312.7505 | 30.77 | 1.061536009 |
| 10946940 | IQEGVFDINNEANGIK        | RAB2, member RAS oncogene family [Mus musculus]                                              | 1760.8785 | 59.37 | 1.190004585 |
| 6678832  | IQETQAEPLR              | minichromosome maintenance protein 6 [Mus musculus]                                          | 1184.6245 | 30.56 | 0           |
| 46593021 | IQEVDQAQMLR             | ubiquinol-cytochrome c reductase core protein 1 [Mus musculus]                               | 1202.6233 | 49.4  | 1.095491705 |
| 6753498  | IQFNESFAEMNR            | cytochrome c oxidase subunit IV isoform 1 [Mus musculus]                                     | 1485.6921 | 76.03 | 2.072931773 |
| 58037546 | IQGGSVVEMQGDDEMTR       | isocitrate dehydrogenase 1 (NADP+), soluble [Mus musculus]                                   | 1736.8027 | 81.41 | 1.259302644 |
| 7657429  | IQIEGDPDFR              | osteoblast specific factor 2 (fascilin I-like) [Mus musculus]                                | 1189.5864 | 27.07 | 2.072418418 |
| 31559981 | IQIWDTAGQER             | RAB15, member RAS oncogene family [Mus musculus]                                             | 1316.6605 | 25.95 | 1.357712501 |
| 31560030 | IQLVEEELDR              | tropomyosin 1, alpha [Mus musculus]                                                          | 1243.6512 | 29.86 | 1.796233139 |
| 40254525 | IQLVEEELDR              | tropomyosin 3, gamma [Mus musculus]                                                          | 1243.6512 | 29.86 | 1.796233139 |
| 21314832 | IQRPPEDSIQPYEK          | UDP-glucose pyrophosphorylase 2 [Mus musculus]                                               | 1699.8658 | 41.53 | 0.963350665 |
| 19526818 | IQTQPGYANTLR            | solute carrier family 25 (mitochondrial carrier, phosphate carrier), member 3 [Mus musculus] | 1361.7211 | 72.75 | 1.343265592 |
| 23956396 | ISEIEDAAFLAR            | SPFH domain family, member 2 [Mus musculus]                                                  | 1334.6921 | 22.55 | 0           |
| 22165384 | ISEQFTAMFR              | tubulin, beta, 2 [Mus musculus]                                                              | 1229.606  | 50.62 | 1.05912403  |
| 12963615 | ISEQFTAMFR              | tubulin, beta 3 [Mus musculus]                                                               | 1229.606  | 50.62 | 1.05912403  |
| 31981939 | ISEQFTAMFR              | tubulin, beta 4 [Mus musculus]                                                               | 1229.606  | 50.62 | 1.05912403  |
| 7106439  | ISEQFTAMFR              | tubulin, beta 5 [Mus musculus]                                                               | 1229.606  | 50.62 | 1.05912403  |
| 21746161 | ISEQFTAMFR              | tubulin, beta [Mus musculus]                                                                 | 1229.606  | 50.62 | 1.05912403  |
| 22122523 | ISFDLAEYTDVGVGTLR       | GDP-mannose 4, 6-dehydratase [Mus musculus]                                                  | 2042.0081 | 76.24 | 1.100892998 |
| 34328206 | ISFPAVQAAPSFSNSFPK      | tryptophanyl-tRNA synthetase [Mus musculus]                                                  | 1894.9677 | 61.06 | 1.004466652 |
| 51491845 | ISGETIFVTAPHEATAGIIGVNR | clathrin, heavy polypeptide (Hc) [Mus musculus]                                              | 2353.2524 | 51.46 | 0.996967151 |
| 21361209 | ISGLIYEETR              | germinal histone H4 [Mus musculus]                                                           | 1180.6273 | 76.06 | 0           |
| 31982755 | ISLPLPTFSSLNLR          | vimentin [Mus musculus]                                                                      | 1557.9039 | 66.55 | 1.251021917 |
| 63476037 | ISLSPEYVYVSSTFR         | PREDICTED: procollagen, type VI, alpha 3 [Mus musculus]                                      | 1747.9006 | 77.14 | 0.720517153 |
| 6677813  | ISSLLEEQFQQGK           | ribosomal protein S8 [Mus musculus]                                                          | 1506.781  | 72.92 | 0.791363141 |
| 31981679 | ISSVQSIHPALEIANAHR      | heat shock protein 1 (chaperonin) [Mus musculus]                                             | 1905.0646 | 75.5  | 1.362212315 |
| 7106439  | ISVYYNEATGGK            | tubulin, beta 5 [Mus musculus]                                                               | 1301.6368 | 81.54 | 2.555070361 |
| 31982522 | ITEIYEGTSEIQR           | acyl-Coenzyme A dehydrogenase, short chain [Mus musculus]                                    | 1538.7739 | 74.67 | 1.348579257 |
| 31981562 | ITLDNAYMEK              | pyruvate kinase 3 [Mus musculus]                                                             | 1197.5767 | 30.7  | 1.561208312 |
| 6679291  | ITLPVDFVTADKFDENAK      | phosphoglycerate kinase 1 [Mus musculus]                                                     | 2023.0459 | 74.08 | 1.053945518 |
| 34328204 | ITPAHDQNDYEVGQR         | valyl-tRNA synthetase 2 [Mus musculus]                                                       | 1742.8101 | 62.31 | 0.912619525 |
| 31981722 | ITPSYVAFTPEGER          | heat shock 70kD protein 5 (glucose-regulated protein) [Mus musculus]                         | 1566.7797 | 79.01 | 0.727055291 |
| 9790073  | ITQVQWNDPGAQYSLVNK      | cadherin 17 [Mus musculus]                                                                   | 2061.0403 | 50.76 | 2.395392351 |
| 54287684 | ITSLEVENQNLR            | eukaryotic translation elongation factor 1 delta isoform b [Mus musculus]                    | 1415.7491 | 38.88 | 2.511742266 |
| 21450277 | IVEIPFNSTNK             | Na+/K+ -ATPase alpha 1 subunit [Mus musculus]                                                | 1261.6791 | 37.27 | 0.935471668 |
| 33598964 | IVFQEFR                 | myosin heavy chain 10, non-muscle [Mus musculus]                                             | 938.5177  | 28.83 | 1.966967828 |
| 7305295  | IVFQEFR                 | myosin, heavy polypeptide 11, smooth muscle [Mus musculus]                                   | 938.5177  | 28.83 | 1.966967828 |
| 6753010  | IVFVDPSTLTVR            | anterior gradient 2 [Mus musculus]                                                           | 1245.7255 | 64.61 | 0.781197717 |
| 51491845 | IVLDNSVFSEHR            | clathrin, heavy polypeptide (Hc) [Mus musculus]                                              | 1415.7201 | 66.8  | 0.788445924 |

|          |                         |                                                                                                     |           |        |             |
|----------|-------------------------|-----------------------------------------------------------------------------------------------------|-----------|--------|-------------|
| 6754482  | IVLQIDNAR               | keratin complex 1, acidic, gene 18 [Mus musculus]                                                   | 1041.6072 | 30.35  | 1.21701258  |
| 6680606  | IVLQIDNAR               | keratin complex 1, acidic, gene 19 [Mus musculus]                                                   | 1041.6072 | 30.35  | 1.21701258  |
| 24418919 | IVNGWQVEEADDWLR         | brain glycogen phosphorylase [Mus musculus]                                                         | 1829.8887 | 57.85  | 1.101058855 |
| 6671622  | IVQAEGEAEAAK            | B-cell receptor-associated protein 37 [Mus musculus]                                                | 1215.6267 | 40.57  | 1.257921746 |
| 18079339 | IVYGHLDPPANQEIER        | aconitase 2, mitochondrial [Mus musculus]                                                           | 1868.9192 | 60.25  | 1.319423491 |
| 8567336  | IWALGGVTSDR             | chloride channel calcium activated 3 [Mus musculus]                                                 | 1174.6299 | 68.93  | 0.184543222 |
| 6678483  | IYDDDFQNLDDGVANALDNIDAR | ubiquitin-activating enzyme E1, Chr X [Mus musculus]                                                | 2614.2122 | 24.2   | 1.108271183 |
| 33859554 | IYELAAGGTAVGTGLNTR      | fumarate hydratase 1 [Mus musculus]                                                                 | 1763.9302 | 89.98  | 1.424713641 |
| 6679299  | IYTSIGEDYDER            | prohibitin [Mus musculus]                                                                           | 1460.6639 | 27.86  | 0           |
| 21703998 | IYVISLAEPR              | aspartyl-tRNA synthetase [Mus musculus]                                                             | 1160.67   | 20.27  | 1.161496348 |
| 22164798 | IYVVDVGSEPR             | selenium binding protein 1 [Mus musculus]                                                           | 1233.651  | 38.78  | 2.033470768 |
| 7305295  | KATLQAEQLSNELATER       | myosin, heavy polypeptide 11, smooth muscle [Mus musculus]                                          | 1901.9943 | 53.79  | 1.773995932 |
| 6671507  | KDLYANNVLSGGTTMYPGIADR  | actin, alpha 2, smooth muscle, aorta [Mus musculus]                                                 | 2356.1685 | 120.75 | 0.825755492 |
| 6671509  | KDLYANNVLSGGTTMYPGIADR  | actin, alpha 2, smooth muscle, aorta [Mus musculus]                                                 | 2357.1497 | 108.35 | 3.118719297 |
| 29789191 | KEDGTFYEFGGDDIPEAPER    | actin, beta, cytoplasmic [Mus musculus]                                                             | 2343.1587 | 131.37 | 1.06426474  |
| 30425112 | KEEEEEEEYDEGSNLK        | asparaginyl-tRNA synthetase [Mus musculus]                                                          | 2214.9851 | 55.48  | 0.786024439 |
| 30425112 | KEEEEEEEYDEGSNLKR       | hypothetical protein LOC109154 [Mus musculus]                                                       | 2085.8726 | 43.12  | 1.040491972 |
| 33598964 | KFDQLLAEEK              | hypothetical protein LOC109154 [Mus musculus]                                                       | 2241.9617 | 91.41  | 2.973120524 |
| 7305295  | KFDQLLAEEK              | myosin heavy chain 10, non-muscle [Mus musculus]                                                    | 1220.6432 | 34.37  | 0           |
| 20137006 | KFDQLLAEEK              | myosin, heavy polypeptide 11, smooth muscle [Mus musculus]                                          | 1220.6432 | 34.37  | 0           |
| 29336026 | KFDQLLAEEK              | myosin, heavy polypeptide 9, non-muscle [Mus musculus]                                              | 1220.6432 | 34.37  | 0           |
| 6753262  | KLEVEANNAFDQYR          | nonmuscle myosin heavy chain [Mus musculus]                                                         | 1220.6432 | 34.37  | 0           |
| 31981246 | KNPDSQYGELIEK           | capping protein (actin filament) muscle Z-line, beta [Mus musculus]                                 | 1696.8232 | 77.31  | 0.733264565 |
| 6679184  | KPEEVDDEVFYSPR          | UMP-CMP kinase [Mus musculus]                                                                       | 1520.7592 | 45.33  | 1.216997086 |
| 6677871  | KPELPGDNDDDVVADISNR     | ornithine transcarbamylase [Mus musculus]                                                           | 1709.801  | 43.26  | 0           |
| 31981722 | KSDIDEIVLVGGSTR         | scinderin [Mus musculus]                                                                            | 2184.0034 | 99.73  | 0.509455421 |
| 8393866  | KTEQGGPPSSEYIFER        | heat shock 70kD protein 5 (glucose-regulated protein) [Mus musculus]                                | 1588.855  | 40.46  | 0.813359692 |
| 21704100 | LAAAFVAVSR              | ornithine aminotransferase [Mus musculus]                                                           | 1767.8536 | 42.94  | 2.052265523 |
| 15617203 | LAALNPESNTSGLDIFAK      | hydroxyacyl-Coenzyme A dehydrogenase/3-ketoacyl-Coenzyme A thiolase/enoyl-Coenzyme A hydratase (tri | 905.5295  | 34.47  | 0           |
| 6678499  | LAANFLAQR               | chloride intracellular channel 1 [Mus musculus]                                                     | 1860.9601 | 56.88  | 1.287336322 |
| 58037267 | LAAVDATMNQVLASR         | UDP-glucose dehydrogenase [Mus musculus]                                                            | 1074.6053 | 40.17  | 2.286283862 |
| 50355692 | LADALQELR               | protein disulfide isomerase-associated 6 [Mus musculus]                                             | 1559.8306 | 41.34  | 0           |
| 31982522 | LADMALALESAR            | lamin A isoform A [Mus musculus]                                                                    | 1028.5603 | 28     | 1.042671244 |
| 13624315 | LAELEAALQR              | acyl-Coenzyme A dehydrogenase, short chain [Mus musculus]                                           | 1260.6478 | 37.78  | 0           |
| 31560731 | LAEMPADSGYPAYLGAR       | keratin complex 2, basic, gene 8 [Mus musculus]                                                     | 1113.63   | 47.63  | 1.71578959  |
| 6753010  | LAEQFVLLNLVYETTDK       | ATPase, H+ transporting, V1 subunit A, isoform 1 [Mus musculus]                                     | 1781.8549 | 33.5   | 1.13206189  |
| 6678483  | LAGTQPLEVLEAVQR         | anterior gradient 2 [Mus musculus]                                                                  | 1996.0641 | 71.3   | 1.531584033 |
| 33563266 | LALFNPDVSWDR            | ubiquitin-activating enzyme E1, Chr X [Mus musculus]                                                | 1623.9102 | 83.54  | 0.818996817 |
| 23956396 | LALQQDLTSMAPGLVIQAVR    | NADH dehydrogenase (ubiquinone) 1 alpha subcomplex, 4 [Mus musculus]                                | 1432.7251 | 58.33  | 1.185571133 |
| 23956166 | LALSQNNQSSGAAGPTGK      | SPFH domain family, member 2 [Mus musculus]                                                         | 2124.1938 | 26.38  | 0.936676906 |
| 51770896 | LAMQEFMILPVGASSFR       | cisplatin resistance-associated overexpressed protein [Mus musculus]                                | 1714.8693 | 63.54  | 0.963875633 |
| 51768219 | LAPAVLLSGLTEVPVPTR      | PREDICTED: similar to Alpha enolase (2-phospho-D-glycerate hydro-lyase) (Non-neural enolase) (NNE)  | 1896.9752 | 42.4   | 1.154412373 |
| 46430508 | LAPDYDALDVANK           | PREDICTED: similar to sodium bicarbonate cotransporter 2b [Mus musculus]                            | 1833.0835 | 25.95  | 0           |
| 31981562 | LAPITSDPTEAAAVGAVEASFK  | ribosomal protein L23a [Mus musculus]                                                               | 1404.6904 | 47.07  | 1.386991433 |
| 21313640 | LAPPLVTLSSGEPEVQYVALR   | pyruvate kinase 3 [Mus musculus]                                                                    | 2145.1025 | 110.01 | 1.059505899 |
| 6755809  | LAQAAQSSVATITR          | adaptor-related protein complex 2, beta 1 subunit [Mus musculus]                                    | 2265.2725 | 23.87  | 1.28749211  |
| 19527018 | LAQDFLDSQNL SAYNTR      | talin 1 [Mus musculus]                                                                              | 1416.7588 | 36.82  | 2.157138298 |
| 18079351 | LAQDPFPLYPGELLEK        | dipeptidylpeptidase III [Mus musculus]                                                              | 1955.9513 | 44.66  | 0           |
| 6753272  | LAQEDPDYGLR             | major vault protein [Mus musculus]                                                                  | 1829.9603 | 49.5   | 1.083207484 |
| 30794206 | LAQQAALLMQQEER          | catalase [Mus musculus]                                                                             | 1276.6172 | 22.13  | 0.99903752  |
| 51770896 | LAQSNWGVVMVSHR          | splicing factor 3b, subunit 2 [Mus musculus]                                                        | 1756.9019 | 21.53  | 4.857139346 |
| 11230802 | LASDLLEWIR              | PREDICTED: similar to Alpha enolase (2-phospho-D-glycerate hydro-lyase) (Non-neural enolase) (NNE)  | 1541.7715 | 40.54  | 1.53200771  |
| 33186863 | LATQLTGPVMPPIR          | actinin alpha 4 [Mus musculus]                                                                      | 1215.6792 | 57.87  | 1.173571958 |
| 63650229 | LAVNMVPPFR              | ribosomal protein L13 [Mus musculus]                                                                | 1396.7997 | 56.63  | 0.932951995 |
| 22165384 | LAVNMVPPFR              | PREDICTED: similar to TUBULIN BETA CHAIN (T BETA-15) [Mus musculus]                                 | 1143.6415 | 45.92  | 0.86338516  |
| 12963615 | LAVNMVPPFR              | tubulin, beta, 2 [Mus musculus]                                                                     | 1143.6415 | 45.92  | 0.86338516  |
| 31981939 | LAVNMVPPFR              | tubulin, beta 3 [Mus musculus]                                                                      | 1143.6415 | 45.92  | 0.86338516  |
| 7106439  | LAVNMVPPFR              | tubulin, beta 4 [Mus musculus]                                                                      | 1143.6415 | 45.92  | 0.86338516  |
| 27754056 | LAVNMVPPFR              | tubulin, beta 5 [Mus musculus]                                                                      | 1143.6415 | 45.92  | 0.86338516  |
|          |                         | tubulin, beta 6 [Mus musculus]                                                                      | 1143.6415 | 45.92  | 0.86338516  |

Deamidation (NQ)

|          |                         |                  |                                                                                                      |           |        |             |
|----------|-------------------------|------------------|------------------------------------------------------------------------------------------------------|-----------|--------|-------------|
| 21746161 | LAVNMPVFPFR             |                  | tubulin, beta [Mus musculus]                                                                         | 1143.6415 | 45.92  | 0.86338516  |
| 7305295  | LDAFLVLEQLR             |                  | myosin, heavy polypeptide 11, smooth muscle [Mus musculus]                                           | 1316.7635 | 52.61  | 1.913357737 |
| 21312950 | LDDLINWAR               |                  | NADH dehydrogenase (ubiquinone) Fe-S protein 7 [Mus musculus]                                        | 1115.5796 | 35.49  | 1.417012007 |
| 30794450 | LDELYGTWR               |                  | ribosomal protein L4 [Mus musculus]                                                                  | 1152.5779 | 38     | 1.035548551 |
| 21704206 | LDFTEEEELLSR            |                  | carboxylesterase 2 [Mus musculus]                                                                    | 1480.7168 | 50.24  | 1.50441724  |
| 31981562 | LDIDSAPITAR             |                  | pyruvate kinase 3 [Mus musculus]                                                                     | 1171.6318 | 44.28  | 1.128284555 |
| 6677819  | LDILDTAGQEEFGAMR        |                  | Harvey rat sarcoma oncogene, subgroup R [Mus musculus]                                               | 1765.8459 | 57.84  | 2.100540769 |
| 13399308 | LDILDTAGQEEFGAMR        |                  | related RAS viral (r-ras) oncogene homolog 2 [Mus musculus]                                          | 1765.8459 | 57.84  | 2.100540769 |
| 54607112 | LDLGSNEFTFVPEVLEQLSGLR  |                  | ErbB2 interacting protein isoform 2 [Mus musculus]                                                   | 2445.24   | 21.25  | 0           |
| 6678359  | LDNLVAIFDINR            |                  | transketolase [Mus musculus]                                                                         | 1402.7755 | 80.31  | 0.969652456 |
| 33598964 | LDPHLVLDQLR             |                  | myosin heavy chain 10, non-muscle [Mus musculus]                                                     | 1318.7496 | 67.55  | 0           |
| 20137006 | LDPHLVLDQLR             |                  | myosin, heavy polypeptide 9, non-muscle [Mus musculus]                                               | 1318.7496 | 67.55  | 0           |
| 33859686 | LDQETAQWLR              |                  | phosphoglucomutase 1 [Mus musculus]                                                                  | 1259.6407 | 47.85  | 3.071239435 |
| 30023842 | LDQLIYIPLPEK            |                  | ubiquitin containing protein [Mus musculus]                                                          | 1556.8505 | 44.52  | 0.836321052 |
| 6678483  | LDQPMTEIVSR             |                  | ubiquitin-activating enzyme E1, Chr X [Mus musculus]                                                 | 1288.6648 | 42.31  | 0.813146228 |
| 6754482  | LEAEIATYR               |                  | keratin complex 1, acidic, gene 18 [Mus musculus]                                                    | 1065.5613 | 40.33  | 1.068574632 |
| 13624315 | LEAELGNMQGLVEDFK        |                  | keratin complex 2, basic, gene 8 [Mus musculus]                                                      | 1792.8839 | 122.03 | 1.284336683 |
| 2506774  | LEAELGNMQGLVEDFK        |                  | Keratin, type II cytoskeletal 8 (Cytokeratin 8) (K8) (CK 8)                                          | 1792.8839 | 122.03 | 1.284336683 |
| 63565108 | LEAELGNMQGLVEDFK        |                  | PREDICTED: similar to cytokeratin EndoA - mouse [Mus musculus]                                       | 1792.8839 | 122.03 | 1.284336683 |
| 18079339 | LEAPDADELPR             |                  | aconitase 2, mitochondrial [Mus musculus]                                                            | 1225.6046 | 50.59  | 1.142129953 |
| 6755817  | LEDKDDLDVTELSNEELLDQLVR |                  | thymopoietin [Mus musculus]                                                                          | 2701.3318 | 53.39  | 0.845472686 |
| 21312062 | LEDLSESIVNDFAYMK        |                  | transmembrane trafficking protein [Mus musculus]                                                     | 1873.8931 | 47.74  | 1.526349084 |
| 31982275 | LEDTENWLYEDGEDQPK       |                  | heat shock protein 4 [Mus musculus]                                                                  | 2080.8965 | 52.28  | 1.037840132 |
| 6679261  | LEEGPPVTTVLTR           |                  | pyruvate dehydrogenase E1 alpha 1 [Mus musculus]                                                     | 1411.7776 | 52.41  | 1.096762039 |
| 6671668  | LEEVDDADDYDNR           |                  | calpain 1 [Mus musculus]                                                                             | 1568.6348 | 74.55  | 0.979779047 |
| 20137006 | LEGDSTDLSQIAELQAIAELK   | Deamidation (NQ) | myosin, heavy polypeptide 9, non-muscle [Mus musculus]                                               | 2488.2271 | 43.3   | 0           |
| 13624315 | LEGLTDEINFLR            |                  | keratin complex 2, basic, gene 8 [Mus musculus]                                                      | 1419.7573 | 73.64  | 1.285306547 |
| 2506774  | LEGLTDEINFLR            |                  | Keratin, type II cytoskeletal 8 (Cytokeratin 8) (K8) (CK 8)                                          | 1419.7573 | 73.64  | 1.285306547 |
| 63565108 | LEGLTDEINFLR            |                  | PREDICTED: similar to cytokeratin EndoA - mouse [Mus musculus]                                       | 1419.7573 | 73.64  | 1.285306547 |
| 51890205 | LEGTNVQEAQNILK          |                  | succinate-Coenzyme A ligase, GDP-forming, beta subunit [Mus musculus]                                | 1556.8265 | 31.22  | 2.806280008 |
| 547749   | LENEIQTYSR              |                  | Keratin, type I cytoskeletal 10 (Cytokeratin 10) (K10) (CK 10)                                       | 1165.5751 | 30.66  | 0.491802121 |
| 6754480  | LEQEIATYR               |                  | keratin 13 [Mus musculus]                                                                            | 1122.5834 | 51.63  | 1.262567273 |
| 21592285 | LEQEIATYR               |                  | keratin 20 [Mus musculus]                                                                            | 1122.5834 | 51.63  | 1.262567273 |
| 6680606  | LEQEIATYR               |                  | keratin complex 1, acidic, gene 19 [Mus musculus]                                                    | 1122.5834 | 51.63  | 1.262567273 |
| 125081   | LEQEIATYR               |                  | Keratin, type I cytoskeletal 15 (Cytokeratin 15) (K15) (CK 15)                                       | 1122.5834 | 51.63  | 1.262567273 |
| 63517295 | LEQVSSDEIGIGTLAENLLEALR |                  | PREDICTED: RIKEN cDNA 1810009A16 [Mus musculus]                                                      | 2357.2112 | 36.01  | 1.130637342 |
| 21704156 | LEQYTNIAIEGTK           |                  | caldesmon 1 [Mus musculus]                                                                           | 1366.6768 | 48.8   | 2.024113271 |
| 29336026 | LESQLQEVQGR             |                  | nonmuscle myosin heavy chain [Mus musculus]                                                          | 1286.67   | 44.9   | 18.66047315 |
| 63565108 | LEVDPNIQAVR             |                  | PREDICTED: similar to cytokeratin EndoA - mouse [Mus musculus]                                       | 1253.6908 | 55.19  | 0.954807299 |
| 6753262  | LEVEANNAFDQYR           |                  | capping protein (actin filament) muscle Z-line, beta [Mus musculus]                                  | 1568.7374 | 31.54  | 0           |
| 7305173  | LFDAQFGVPR              |                  | heat shock protein 1 [Mus musculus]                                                                  | 1149.6116 | 48.45  | 2.227362491 |
| 55742711 | LFELEEQLFR              |                  | EH-domain containing 2 [Mus musculus]                                                                | 1438.7286 | 60.18  | 1.600020005 |
| 55742711 | LFELEEQLFR              | Deamidation (NQ) | EH-domain containing 2 [Mus musculus]                                                                | 1439.7314 | 24.39  | 0           |
| 63650187 | LFIGGLNVQTSSEGLR        |                  | PREDICTED: similar to heterogeneous nuclear ribonucleoprotein A0 [Mus musculus]                      | 1690.9128 | 22.47  | 1.241621403 |
| 31559916 | LFIGGLSFETDDSLR         |                  | heterogeneous nuclear ribonucleoprotein A3 isoform b [Mus musculus]                                  | 1770.8896 | 47.28  | 0.790893932 |
| 6680836  | LFPSGLDQK               |                  | calreticulin [Mus musculus]                                                                          | 1004.5355 | 35.91  | 0           |
| 8567338  | LFQSNPDLR               |                  | coatamer protein complex, subunit gamma [Mus musculus]                                               | 1190.6177 | 28.15  | 2.171817292 |
| 23956214 | LFVGNLPADITEDEFK        |                  | splicing factor proline/glutamine rich (polypyrimidine tract binding protein associated) [Mus muscu] | 1807.9087 | 57.77  | 1.419457615 |
| 31560613 | LFVTDAAATILR            |                  | chaperonin subunit 8 (theta) [Mus musculus]                                                          | 1333.7517 | 43.63  | 0           |
| 38198665 | LGAAPPEESAYVAGER        |                  | p47 protein [Mus musculus]                                                                           | 1648.7825 | 54.63  | 1.192075899 |
| 6680163  | LGAGYPMGPFELLDVYGLDITTK |                  | L-3-hydroxyacyl-Coenzyme A dehydrogenase, short chain [Mus musculus]                                 | 2357.1833 | 35.97  | 1.859357919 |
| 54607098 | LGANSLDLVVFGR           |                  | succinate dehydrogenase Fp subunit [Mus musculus]                                                    | 1473.8423 | 44.74  | 0.908864914 |
| 31982755 | LGDLYEEEMR              |                  | vimentin [Mus musculus]                                                                              | 1254.5725 | 63.56  | 1.472674051 |
| 6679291  | LGDVYVNDAFGTAHR         |                  | phosphoglycerate kinase 1 [Mus musculus]                                                             | 1634.7968 | 93.52  | 1.593630663 |
| 136429   | LGEHNIDVLEQNEQFINAAK    |                  | Trypsin precursor                                                                                    | 2211.1084 | 121.71 | 0           |
| 6755893  | LGEHNINVLEQNEQFVNSAK    | Deamidation (NQ) | trypsin 4 [Mus musculus]                                                                             | 2213.0764 | 26.63  | 0           |
| 6671571  | LGEIVTTIPTIGFNVETVEYK   |                  | ADP-ribosylation factor 2 [Mus musculus]                                                             | 2323.2439 | 96.23  | 1.164282593 |
| 6754208  | LGEMWNNATAADDKQPYEK     |                  | high mobility group box 1 [Mus musculus]                                                             | 2109.9548 | 61.75  | 0.972219394 |
| 33859506 | LGEYGFQNAILVR           |                  | albumin 1 [Mus musculus]                                                                             | 1479.802  | 85.86  | 1.854845055 |
| 10946574 | LGFESEVLVQMVVDGVK       |                  | creatine kinase, brain [Mus musculus]                                                                | 1848.9823 | 51.86  | 2.51298349  |

|          |                           |                                                                                                     |           |        |             |
|----------|---------------------------|-----------------------------------------------------------------------------------------------------|-----------|--------|-------------|
| 6754084  | LGLDFPNLPYLIDGSHK         | glutathione S-transferase, mu 1 [Mus musculus]                                                      | 1898.9863 | 40.77  | 1.016424652 |
| 6680121  | LGLDFPNLPYLIDGSHK         | glutathione S-transferase, mu 2 [Mus musculus]                                                      | 1898.9863 | 40.77  | 1.016424652 |
| 6678097  | LGMTDAFGGR                | serine (or cysteine) proteinase inhibitor, clade B, member 6a [Mus musculus]                        | 1024.4945 | 58.94  | 1.214442    |
| 6753036  | LGPALATGNVVMK             | aldehyde dehydrogenase 2, mitochondrial [Mus musculus]                                              | 1369.7806 | 49.94  | 1.221844425 |
| 6678359  | LQQSDPAPLQHQVDIYQK        | transketolase [Mus musculus]                                                                        | 2037.0414 | 79.22  | 0.90990654  |
| 25020120 | LGSQATGVGQQAGQLDTESTLGR   | PREDICTED: laminin, alpha 5 [Mus musculus]                                                          | 2488.26   | 50.12  | 0           |
| 31560611 | LGTDQPLDQATISLQMGTNK      | calponin 1 [Mus musculus]                                                                           | 2131.0691 | 73.58  | 1.545531272 |
| 31542159 | LHEFTISGTTYTPEGEVR        | ATPase, Ca++ transporting, ubiquitous [Mus musculus]                                                | 2036.9844 | 34.47  | 0.626248647 |
| 6755901  | LIGQIVSSITASLR            | tubulin, alpha 1 [Mus musculus]                                                                     | 1457.8715 | 29.55  | 1.269169458 |
| 6678573  | LIQWNGPESNR               | villin 1 [Mus musculus]                                                                             | 1426.7566 | 41.56  | 1.413016003 |
| 22164798 | LILPGLISSR                | selenium binding protein 1 [Mus musculus]                                                           | 1068.6881 | 34.25  | 2.241288938 |
| 63489754 | LIQEQHPHEELIK             | PREDICTED: similar to Spectrin alpha chain, brain (Spectrin, non-erythroid alpha chain) (Alpha-II s | 1605.8162 | 21.6   | 0           |
| 34740335 | LISQIVSSITASLR            | tubulin, alpha 2 [Mus musculus]                                                                     | 1487.8838 | 86.88  | 1.396427913 |
| 6678467  | LISQIVSSITASLR            | tubulin, alpha 4 [Mus musculus]                                                                     | 1487.8838 | 86.88  | 1.396427913 |
| 6678469  | LISQIVSSITASLR            | tubulin, alpha 6 [Mus musculus]                                                                     | 1487.8838 | 86.88  | 1.396427913 |
| 6679937  | LISWYDNEYGYNSNR           | similar to glyceraldehyde-3-phosphate dehydrogenase [Mus musculus]                                  | 1779.8066 | 73.25  | 1.006036466 |
| 6680748  | LKEIVTNFLAGFEP            | ATP synthase, H+ transporting, mitochondrial F1 complex, alpha subunit, isoform 1 [Mus musculus]    | 1577.8457 | 34.62  | 0           |
| 547749   | LKYENEVALR                | Keratin, type I cytoskeletal 10 (Cytokeratin 10) (K10) (CK 10)                                      | 1234.6809 | 37.49  | 0           |
| 27370092 | LLDAVDTYIPVPTR            | Tu translation elongation factor, mitochondrial [Mus musculus]                                      | 1572.8672 | 71.24  | 1.625036071 |
| 6755002  | LLDEEEATDNDLR             | programmed cell death 6 interacting protein [Mus musculus]                                          | 1532.7037 | 36.93  | 1.996012597 |
| 15809004 | LLDFVLGQEIR               | cyclin M4 [Mus musculus]                                                                            | 1302.7435 | 28.78  | 1.311744125 |
| 9790261  | LLDSLEPPGEPGPGSTSPENDVDGR | Trk-fused gene [Mus musculus]                                                                       | 2692.2883 | 46.26  | 0.8113052   |
| 55742711 | LLEALDDMLAQDIK            | EH-domain containing 2 [Mus musculus]                                                               | 1658.8549 | 49.4   | 1.208689523 |
| 6754482  | LLEDGEDFSLNDALDSSNSMQTVQK | keratin complex 1, acidic, gene 18 [Mus musculus]                                                   | 2756.2646 | 21.1   | 0.926706526 |
| 31981828 | LLELGPKEVAQAQTR           | coatamer protein complex subunit alpha [Mus musculus]                                               | 1678.9519 | 50.96  | 0.907075302 |
| 54607037 | LLELQEVDSLLR              | integrin beta 4 isoform 2 [Mus musculus]                                                            | 1427.8203 | 22.79  | 1.141649789 |
| 16716471 | LLENMTEVVR                | hypothetical protein LOC94184 [Mus musculus]                                                        | 1203.6481 | 23.49  | 3.802239556 |
| 6753066  | LLETEEEAAFPPLGGATPR       | amine oxidase, copper containing 3 [Mus musculus]                                                   | 1900.9585 | 73.63  | 1.382570173 |
| 29336026 | LLGLGVTDFSR               | nonmuscle myosin heavy chain [Mus musculus]                                                         | 1177.6633 | 49.63  | 1.273331133 |
| 31982300 | LLGNMIVVLGHHLGK           | hemoglobin, beta adult major chain [Mus musculus]                                                   | 1714.0273 | 34.41  | 0           |
| 6754256  | LLGQFTLIGIPPAPR           | heat shock protein 9A [Mus musculus]                                                                | 1592.9508 | 21.07  | 1.029090602 |
| 10946574 | LLIEMEQR                  | creatine kinase, brain [Mus musculus]                                                               | 1031.5581 | 27.06  | 1.852869069 |
| 27370510 | LLIYNPEDPPGSEVLR          | paraoxonase 3 [Mus musculus]                                                                        | 1811.926  | 21.61  | 0           |
| 6671672  | LLLNNNDLLR                | capping protein (actin filament) muscle Z-line, alpha 2 [Mus musculus]                              | 1197.7069 | 30.9   | 1.696714324 |
| 28316750 | LLLPGLAK                  | histone 1, H2ba [Mus musculus]                                                                      | 953.6071  | 59.17  | 0.77730347  |
| 20874851 | LLLPGLAK                  | PREDICTED: similar to histone H2b-616 [Mus musculus]                                                | 953.6071  | 59.17  | 0.77730347  |
| 63556656 | LLNPQGAIR                 | PREDICTED: RIKEN cDNA A430096B05 gene [Mus musculus]                                                | 981.5851  | 41.59  | 0.250476959 |
| 31981690 | LLQDFFNKG                 | heat shock protein 8 [Mus musculus]                                                                 | 1081.5712 | 51.41  | 1.139423465 |
| 50080209 | LLQDFFNGR                 | heat shock protein 1A [Mus musculus]                                                                | 1109.588  | 31.29  | 1.092102049 |
| 24418919 | LLSLVDDEAFIR              | brain glycogen phosphorylase [Mus musculus]                                                         | 1390.7628 | 81.86  | 1.200234559 |
| 63562740 | LLTSAAFEDCQTR             | PREDICTED: similar to secreted gel-forming mucin [Mus musculus]                                     | 1454.7007 | 79.93  | 1.021630372 |
| 31982300 | LLVVPWTQR                 | hemoglobin, beta adult major chain [Mus musculus]                                                   | 1274.7296 | 22.74  | 1.736049847 |
| 28077013 | LLYEANLPENFR              | stromal membrane-associated protein 1 [Mus musculus]                                                | 1478.7648 | 26.76  | 1.800241032 |
| 51491845 | LLYNNVSNFGR               | clathrin, heavy polypeptide (Hc) [Mus musculus]                                                     | 1296.6796 | 63.41  | 1.110842353 |
| 19923052 | LMDEVAGIVAAR              | brain acyl-CoA hydrolase [Mus musculus]                                                             | 1244.6642 | 36.11  | 1.188990735 |
| 31560689 | LMFNDFLSSSSDK             | 3-hydroxy-3-methylglutaryl-Coenzyme A synthase 2 [Mus musculus]                                     | 1490.7101 | 46.22  | 1.16217849  |
| 1346343  | LNDLEDALQQAQK             | Keratin, type II cytoskeletal 1 (Cytokeratin 1) (K1) (CK 1) (67 kDa cytokeratin) (Hair alpha protei | 1357.7006 | 73.89  | 0.25308302  |
| 6755809  | LNEAAAGLNQAATELVQASR      | talín 1 [Mus musculus]                                                                              | 2027.0554 | 46.11  | 2.060406912 |
| 21450277 | LNIPVNVQVNP               | Na+/K+ -ATPase alpha 1 subunit [Mus musculus]                                                       | 1263.724  | 38.71  | 0.979294365 |
| 52317152 | LNIAQADQAPVIAVLGSGGGLR    | phospholipase A2, group IVC (cytosolic, calcium-independent) [Mus musculus]                         | 2049.1536 | 33.07  | 0           |
| 45387933 | LNIQPSETDYAVDIR           | UDP-glucose ceramide glucosyltransferase-like 1 [Mus musculus]                                      | 1733.8716 | 60.12  | 1.092467168 |
| 63476037 | LNLLDLDYELAEQLDNIAEK      | PREDICTED: procollagen, type VI, alpha 3 [Mus musculus]                                             | 2332.187  | 113.45 | 0.762174101 |
| 55742711 | LNPFNGTFLNR               | EH-domain containing 2 [Mus musculus]                                                               | 1292.6732 | 23.73  | 1.171551326 |
| 22164798 | LNPNFLVDFGK               | selenium binding protein 1 [Mus musculus]                                                           | 1263.6713 | 59.97  | 2.041601203 |
| 13384736 | LNTQEIFDDWAR              | dynein, cytoplasmic, heavy chain 1 [Mus musculus]                                                   | 1507.7321 | 41.85  | 0.868370732 |
| 33859811 | LPAKPEVSSDEDVQYR          | hydroxyacyl-Coenzyme A dehydrogenase/3-ketoacyl-Coenzyme A thiolase/enoyl-Coenzyme A hydratase (tri | 1832.889  | 111.33 | 0.696838963 |
| 33859506 | LPCVEDYLSAILNR            | albumin 1 [Mus musculus]                                                                            | 1605.8308 | 53.23  | 1.932565726 |
| 31982330 | LPDQQDTAQDASVEVNR         | Golgi autoantigen, golgin subfamily a, 3 [Mus musculus]                                             | 1885.8807 | 41.03  | 2.428147005 |
| 28916703 | LPPFIIDDK                 | peroxiredoxin 5 related sequence 1 protein [Mus musculus]                                           | 1057.5907 | 45.45  | 2.441682853 |
| 6671549  | LPPFIIDDK                 | peroxiredoxin 6 [Mus musculus]                                                                      | 1057.5907 | 45.45  | 2.441682853 |

|          |                       |                  |                                                                                                  |           |        |             |
|----------|-----------------------|------------------|--------------------------------------------------------------------------------------------------|-----------|--------|-------------|
| 56119103 | LPGQPPASMGR           |                  | guanosine diphosphate (GDP) dissociation inhibitor 3 [Mus musculus]                              | 1110.5741 | 39.36  | 0.752725109 |
| 51873060 | LPLQDVYK              |                  | eukaryotic translation elongation factor 1 alpha 1 [Mus musculus]                                | 975.5501  | 45.77  | 0.844130438 |
| 12963765 | LPNQTHPDTVPVGDESQAR   |                  | seryl-aminoacyl-tRNA synthetase 2 [Mus musculus]                                                 | 1961.9332 | 39.21  | 0           |
| 63746482 | LPQLPITNFSR           |                  | PREDICTED: filamin, alpha [Mus musculus]                                                         | 1285.7231 | 35.07  | 1.039097111 |
| 31543918 | LPQPPEGQTYNN          |                  | ubiquitin-conjugating enzyme E2 variant 2 [Mus musculus]                                         | 1357.6304 | 42.02  | 1.358311708 |
| 21450325 | LPSEGPQPAHVVGVDVR     |                  | biliverdin reductase B (flavin reductase (NADPH)) [Mus musculus]                                 | 1756.9364 | 37.42  | 1.947303086 |
| 63738313 | LPSGSGPASPPTTGSAVDIR  |                  | PREDICTED: similar to AHNAK [Mus musculus]                                                       | 1769.8965 | 42.79  | 1.353176416 |
| 41322904 | LPVDVAYQR             |                  | plectin 1 isoform 1 [Mus musculus]                                                               | 1060.5828 | 31.91  | 1.865692134 |
| 31560689 | LPWDAVGR              |                  | 3-hydroxy-3-methylglutaryl-Coenzyme A synthase 2 [Mus musculus]                                  | 913.4964  | 35.17  | 1.598094172 |
| 7710042  | LPYDVTPEQALSHEEVK     |                  | IQ motif containing GTPase activating protein 1 [Mus musculus]                                   | 1954.9806 | 26.72  | 0.717307402 |
| 13624315 | LQAEIEALK             |                  | keratin complex 2, basic, gene 8 [Mus musculus]                                                  | 1014.5792 | 35.3   | 1.711600125 |
| 31982755 | LQDEIQNMKEEMAR        |                  | vimentin [Mus musculus]                                                                          | 1734.8159 | 36.64  | 0.939752697 |
| 34328286 | LQDPFVSVR             |                  | succinate dehydrogenase lp subunit [Mus musculus]                                                | 1124.5852 | 39.11  | 1.313315552 |
| 33563250 | LQEEIQLR              |                  | desmin [Mus musculus]                                                                            | 1028.5776 | 37.96  | 2.229784273 |
| 6678573  | LQEENQVITPR           |                  | villin 1 [Mus musculus]                                                                          | 1326.7067 | 64.15  | 1.122268913 |
| 50355692 | LQEKEDLQELNDR         |                  | lamin A isoform A [Mus musculus]                                                                 | 1629.8136 | 59.92  | 1.216483641 |
| 6677905  | LQETEMMDPELDYTLMR     |                  | golgi apparatus protein 1 [Mus musculus]                                                         | 2114.9546 | 40.03  | 1.43573059  |
| 34594657 | LQGPQTSAEVYR          |                  | glycerol-3-phosphate dehydrogenase 1-like [Mus musculus]                                         | 1348.6932 | 34.84  | 0           |
| 10946940 | LQIWDTAGQESFR         |                  | RAB2, member RAS oncogene family [Mus musculus]                                                  | 1550.7677 | 70.4   | 0.874413717 |
| 21450625 | LQMEAPHIIVGTPGR       |                  | eukaryotic translation initiation factor 4A1 [Mus musculus]                                      | 1618.8804 | 63.05  | 0.908798773 |
| 51771446 | LQMEAPHIIVGTPGR       |                  | PREDICTED: similar to eukaryotic translation initiation factor 4A, isoform 1 [Mus musculus]      | 1618.8804 | 63.05  | 0.908798773 |
| 31982091 | LQMEQQQLQQR           |                  | translocase of outer mitochondrial membrane 22 homolog [Mus musculus]                            | 1557.783  | 23.66  | 2.184215805 |
| 7305295  | LQNEVESVTGMLNEAEGK    |                  | myosin, heavy polypeptide 11, smooth muscle [Mus musculus]                                       | 1947.9318 | 83.38  | 1.809295967 |
| 41322904 | LQNVQIALDYLR          |                  | plectin 1 isoform 1 [Mus musculus]                                                               | 1445.8188 | 25.08  | 1.415340846 |
| 29336026 | LQQLDDATVDLGGQK       |                  | nonmuscle myosin heavy chain [Mus musculus]                                                      | 1800.8622 | 63.64  | 0.874497191 |
| 7305295  | LQQLDDLVVDLNDQR       |                  | myosin, heavy polypeptide 11, smooth muscle [Mus musculus]                                       | 1912.9697 | 132.02 | 2.148399271 |
| 7305295  | LQQLDDLVVDLNDQR       | Deamidation (NQ) | myosin, heavy polypeptide 11, smooth muscle [Mus musculus]                                       | 1913.9442 | 21.79  | 3.808194588 |
| 19527026 | LQQLPADFGR            |                  | hypothetical protein LOC98238 [Mus musculus]                                                     | 1144.6118 | 50.15  | 0.928047227 |
| 51829617 | LQSGIEDLR             | Deamidation (NQ) | PREDICTED: hypothetical protein XP_484257 [Mus musculus]                                         | 1031.5376 | 20.05  | 0           |
| 31980942 | LQVSQQEDITK           |                  | Inositol (myo)-1(or 4)-monophosphatase 1 [Mus musculus]                                          | 1288.6779 | 45.83  | 1.090341673 |
| 31791057 | LSAEDLVLEGAGLR        |                  | laminin, gamma 1 [Mus musculus]                                                                  | 1442.7946 | 52.62  | 0.789549162 |
| 63476037 | LSDAGITPLFLTQEDR      |                  | PREDICTED: procollagen, type VI, alpha 3 [Mus musculus]                                          | 1862.9487 | 64.39  | 0.731002578 |
| 63489759 | LSDDNTIGQEEIQQR       |                  | PREDICTED: spectrin alpha 2 [Mus musculus]                                                       | 1745.8319 | 78.02  | 1.443509505 |
| 6671666  | LSDLLAPISEQIQEVITFR   |                  | CAP, adenylate cyclase-associated protein 1 [Mus musculus]                                       | 2172.1914 | 112.23 | 1.210294302 |
| 12963539 | LSGAQADLHIGEGDSIR     |                  | ETHE1 protein [Mus musculus]                                                                     | 1738.879  | 69.93  | 1.532704229 |
| 27229048 | LSGVSVSSDAFFPFR       |                  | 5-aminimidazole-4-carboxamide ribonucleotide formyltransferase/IMP cyclohydrolase [Mus musculus] | 1615.8165 | 44.95  | 1.043333777 |
| 6671549  | LSILYPATTGR           |                  | peroxiredoxin 6 [Mus musculus]                                                                   | 1191.6729 | 61.09  | 3.816559717 |
| 21450277 | LSLDELHR              |                  | Na <sup>+</sup> /K <sup>+</sup> -ATPase alpha 1 subunit [Mus musculus]                           | 982.5351  | 29.69  | 2.0983929   |
| 6679166  | LSLLEELTLAENQLLR      |                  | osteoglycin [Mus musculus]                                                                       | 1855.0563 | 35.92  | 1.039064276 |
| 63641940 | LSLQDAVNQGLIDQDMATR   |                  | PREDICTED: desmoplakin [Mus musculus]                                                            | 2088.041  | 40     | 0.896352992 |
| 6755787  | LSPPYSSPQEFQADVGR     |                  | tripartite motif protein 28 [Mus musculus]                                                       | 1877.9105 | 44.09  | 0.943147592 |
| 29336026 | LSQLEEELEEEQNNSELLK   |                  | nonmuscle myosin heavy chain [Mus musculus]                                                      | 2274.0874 | 25.54  | 0.647323197 |
| 6755967  | LSQNNFALGYK           |                  | voltage-dependent anion channel 3 [Mus musculus]                                                 | 1254.647  | 45.56  | 1.365163408 |
| 12963539 | LSQQSASGAPVLLR        |                  | ETHE1 protein [Mus musculus]                                                                     | 1426.8058 | 23.7   | 0.857354177 |
| 33859506 | LSQTFPNADFAEITK       |                  | albumin 1 [Mus musculus]                                                                         | 1681.8477 | 55.32  | 1.580429038 |
| 6754556  | LSSEMNTSTVNSAR        |                  | lamin B1 [Mus musculus]                                                                          | 1496.7075 | 29.39  | 0.786693683 |
| 6754556  | LSSEMNTSTVNSAR        | Oxidation (M)    | lamin B1 [Mus musculus]                                                                          | 1512.6971 | 24.65  | 0           |
| 34996495 | LSSGYDFSVR            |                  | ribophorin II [Mus musculus]                                                                     | 1293.6139 | 23.51  | 0.940538709 |
| 136429   | LSSPATLSNR            |                  | Trypsin precursor                                                                                | 1045.5665 | 48.54  | 0           |
| 7305085  | LSTDHIPILYR           |                  | glutamine fructose-6-phosphate transaminase 1 [Mus musculus]                                     | 1327.74   | 47.6   | 0.910219488 |
| 6680606  | LSVEADINGLR           |                  | keratin complex 1, acidic, gene 19 [Mus musculus]                                                | 1186.6418 | 34.27  | 0           |
| 22122387 | LSVGLEDEQDLEDLDR      |                  | cystathionase [Mus musculus]                                                                     | 1958.9635 | 73.02  | 0           |
| 6679012  | LTDQVMQNPQVLAALQER    |                  | nucleosome assembly protein 1-like 4 [Mus musculus]                                              | 2054.0635 | 30.52  | 0.832410821 |
| 31981983 | LTEPQLGLGSQR          |                  | stromal interaction molecule 1 [Mus musculus]                                                    | 1298.7091 | 28.47  | 1.782475378 |
| 29789191 | LTESVDVLMNPVGEIVGGMSR |                  | asparaginyl-tRNA synthetase [Mus musculus]                                                       | 2203.1118 | 51.79  | 1.108362696 |
| 6755963  | LTDFSSFSPTNGK         |                  | voltage-dependent anion channel 1 [Mus musculus]                                                 | 1400.6658 | 71.53  | 1.075048056 |
| 6755965  | LTFDTTFSPTNGK         |                  | voltage-dependent anion channel 2 [Mus musculus]                                                 | 1428.6903 | 25.89  | 0           |
| 51765915 | LTLIDPETLLPR          |                  | PREDICTED: TBP-interacting protein [Mus musculus]                                                | 1380.8096 | 51.61  | 0.937309628 |
| 63501125 | LTQQAGDLTVPAGGQR      |                  | PREDICTED: ADP-ribosylation factor interacting protein 1 [Mus musculus]                          | 1611.842  | 41.34  | 0.900352045 |
| 7106389  | LTVEDPVTVEYITR        |                  | proteasome (prosome, macropain) subunit, alpha type 7 [Mus musculus]                             | 1634.8674 | 34.26  | 1.161096854 |

|          |                           |               |                                                                                                     |           |        |             |
|----------|---------------------------|---------------|-----------------------------------------------------------------------------------------------------|-----------|--------|-------------|
| 51556274 | LVAGEMGQNEPDQGGQR         |               | hydroxyacyl-Coenzyme A dehydrogenase type II [Mus musculus]                                         | 1785.8229 | 73.33  | 1.549410146 |
| 13385472 | LVAIVDVIDQNR              |               | ribosomal protein L14 [Mus musculus]                                                                | 1354.7694 | 43.6   | 1.054063525 |
| 19527028 | LVGEIMQETGTR              |               | high density lipoprotein binding protein [Mus musculus]                                             | 1333.6807 | 29.14  | 1.406542405 |
| 6678992  | LVGILDILDEENR             |               | myosin VI [Mus musculus]                                                                            | 1498.8101 | 45.76  | 1.281190491 |
| 31981273 | LVPDMPEVVSEQVSSYLSK       |               | CNDP dipeptidase 2 (metallopeptidase M20 family) [Mus musculus]                                     | 2220.1084 | 28.21  | 1.752646216 |
| 63518159 | LVPLLDTGDIHIDGGNSEYR      |               | PREDICTED: phosphogluconate dehydrogenase [Mus musculus]                                            | 2160.1165 | 94.95  | 1.393665808 |
| 31543942 | LVQAAQLMSDPYSVPAR         |               | vinculin [Mus musculus]                                                                             | 1974.0072 | 24.6   | 1.070431445 |
| 6754976  | LVQAFQFTDK                |               | peroxiredoxin 1 [Mus musculus]                                                                      | 1196.6294 | 48.36  | 1.130673842 |
| 31981679 | LVQDVANNTNEEAGDGTATVLAR   |               | heat shock protein 1 (chaperonin) [Mus musculus]                                                    | 2560.2554 | 133.13 | 0.994217848 |
| 33859506 | LVQEVTDFAK                |               | albumin 1 [Mus musculus]                                                                            | 1149.6145 | 55.41  | 1.565183744 |
| 14149635 | LVSSSENFDDYMK             |               | fatty acid binding protein 4, adipocyte [Mus musculus]                                              | 1447.6532 | 40.1   | 0.98510164  |
| 63530525 | LVTFFESVAVPLQQGAEQQR      |               | PREDICTED: SEC31-like 1 [Mus musculus]                                                              | 2100.1196 | 43.9   | 0.697242621 |
| 19527026 | LVTLPVSAFLK               |               | hypothetical protein LOC98238 [Mus musculus]                                                        | 1315.7906 | 40.05  | 0.381162838 |
| 24418919 | LVTSGIDVVNHDPVVGDR        |               | brain glycogen phosphorylase [Mus musculus]                                                         | 1891.9851 | 40.5   | 0.970682721 |
| 6680047  | LWDLTTGTTTR               |               | guanine nucleotide binding protein (G protein), beta polypeptide 2 like 1 [Mus musculus]            | 1264.6593 | 59.62  | 1.044453326 |
| 6754090  | LWMAAMQQDPVASSHK          |               | glutathione S-transferase omega 1 [Mus musculus]                                                    | 1799.8497 | 21.64  | 0.972488774 |
| 31560517 | LWTLVSEQTR                |               | ribosomal protein L27a [Mus musculus]                                                               | 1232.6688 | 44.66  | 0.876457228 |
| 6753010  | LYAYEPSDTALLYDNMK         | Oxidation (M) | anterior gradient 2 [Mus musculus]                                                                  | 2006.943  | 80.98  | 0.74517534  |
| 6753010  | LYAYEPSDTALLYDNMK         |               | anterior gradient 2 [Mus musculus]                                                                  | 2022.9613 | 33.25  | 0.461912735 |
| 19525729 | LYDIEQQITDALENIR          |               | crystallin, lamda 1 [Mus musculus]                                                                  | 2062.0461 | 62.24  | 1.794445841 |
| 6755048  | LYDPLDGMVSDGQDIR          |               | ATP-binding cassette, sub-family B (MDR/TAP), member 1A [Mus musculus]                              | 1906.9288 | 27.61  | 1.579581989 |
| 31560618 | LYDVPANSMR                |               | budding uninhibited by benzimidazoles 3 homolog [Mus musculus]                                      | 1165.5665 | 28.52  | 0           |
| 6753304  | LYGPPSVSFADDFVR           |               | serine (or cysteine) proteinase inhibitor, clade H, member 1 [Mus musculus]                         | 1659.8029 | 36.96  | 1.450809392 |
| 31981722 | LYGSGGPPPTGEEDTSEKDEL     |               | heat shock 70kD protein 5 (glucose-regulated protein) [Mus musculus]                                | 2177.9731 | 98.52  | 0.809021466 |
| 6753266  | LYPIANGNNQSPIDIK          |               | carbonic anhydrase 1 [Mus musculus]                                                                 | 1756.9187 | 79.19  | 3.748214709 |
| 6753428  | LYPPSAEYDPLR              |               | creatine kinase, mitochondrial 1, ubiquitous [Mus musculus]                                         | 1420.7155 | 49.76  | 2.239612439 |
| 31542333 | LYQPEYQEVSTEEQR           |               | hypoxia up-regulated 1 [Mus musculus]                                                               | 1898.8776 | 83.23  | 0.893299748 |
| 7106389  | LYQTDPSGTYHAWK            |               | proteasome (prosome, macropain) subunit, alpha type 7 [Mus musculus]                                | 1666.7904 | 29.85  | 1.265003303 |
| 16716589 | LYTLVTVYVPVTTFK           |               | ribosomal protein L31 [Mus musculus]                                                                | 1644.9172 | 39.99  | 1.077266094 |
| 30519997 | LYTVDYLSNMVGGRR           |               | bleomycin hydrolase [Mus musculus]                                                                  | 1587.7814 | 25.77  | 0           |
| 31981939 | MAATFIGNSTAIQELFK         | Oxidation (M) | tubulin, beta 4 [Mus musculus]                                                                      | 1857.941  | 38.16  | 1.819989721 |
| 63530525 | MADAILLAIAGGQELLAQTQK     |               | PREDICTED: SEC31-like 1 [Mus musculus]                                                              | 2155.1797 | 37.32  | 0           |
| 11230802 | MAPYQGPDAAPGALDYK         |               | actinin alpha 4 [Mus musculus]                                                                      | 1764.8274 | 44.53  | 1.127079411 |
| 7305295  | MAQQLDLEEQLEEEEAAR        |               | myosin, heavy polypeptide 11, smooth muscle [Mus musculus]                                          | 2263.0254 | 100.66 | 1.930927507 |
| 6679687  | MDATANDVPSPYEVK           |               | glucose regulated protein [Mus musculus]                                                            | 1636.7549 | 63.03  | 0.895023585 |
| 22203749 | MDDPTVNWNSNER             |               | G1 to S phase transition 1 [Mus musculus]                                                           | 1463.6294 | 44.21  | 1.491261874 |
| 6678097  | MDEEEVEVFLPK              |               | serine (or cysteine) proteinase inhibitor, clade B, member 6a [Mus musculus]                        | 1464.7145 | 23.47  | 0.177748887 |
| 30023842 | MDELQLFR                  |               | valosin containing protein [Mus musculus]                                                           | 1051.5287 | 35.23  | 0.95166289  |
| 40068507 | MDENQFVAVTSTNAAK          |               | collapsin response mediator protein 1 [Mus musculus]                                                | 1725.8163 | 58.82  | 0.720479325 |
| 40254595 | MDENQFVAVTSTNAAK          |               | dihydropyrimidinase-like 2 [Mus musculus]                                                           | 1725.8163 | 58.82  | 0.720479325 |
| 6681219  | MDENQFVAVTSTNAAK          |               | dihydropyrimidinase-like 3 [Mus musculus]                                                           | 1725.8163 | 58.82  | 0.720479325 |
| 18700026 | MDESEANEAPAGEAAAR         |               | oxidation resistance 1 [Mus musculus]                                                               | 1718.7202 | 30.17  | 0           |
| 63738313 | MDINAPDMDVQGPDWHLK        |               | PREDICTED: similar to AHNAK [Mus musculus]                                                          | 2081.9487 | 28.79  | 0.72555481  |
| 10946972 | MFAEYLAENQR               |               | epsilon subunit of coatomer protein complex [Mus musculus]                                          | 1458.6854 | 26.83  | 2.081462264 |
| 47578123 | MFTQQQPQELAR              |               | potassium channel tetramerisation domain containing 12 [Mus musculus]                               | 1476.7296 | 35.03  | 0           |
| 7949037  | MFTSGIDLMDMASELMQPSGDDAAR |               | enoyl coenzyme A hydratase 1, peroxisomal [Mus musculus]                                            | 2689.1802 | 23.55  | 1.512194657 |
| 21450625 | MFVLDEADEMLSR             |               | eukaryotic translation initiation factor 4A1 [Mus musculus]                                         | 1555.7218 | 56.77  | 1.203357555 |
| 51771446 | MFVLDEADEMLSR             |               | PREDICTED: similar to eukaryotic translation initiation factor 4A, isoform 1 [Mus musculus]         | 1555.7218 | 56.77  | 1.203357555 |
| 23956214 | MGGGGTMMNGDPYSGGGQK       |               | splicing factor proline/glutamine rich (polypyrimidine tract binding protein associated) [Mus muscu | 1801.7355 | 49.3   | 0.955498089 |
| 33859811 | MGLVDQLVEPLGPGIK          |               | hydroxyacyl-Coenzyme A dehydrogenase/3-ketoacyl-Coenzyme A thiolase/enoyl-Coenzyme A hydratase (tri | 1665.9203 | 43.8   | 0.85821085  |
| 31980685 | MIEQDDFDINTR              |               | glucosamine [Mus musculus]                                                                          | 1496.6738 | 48.38  | 1.482728792 |
| 21704206 | MIPAVVDGEFFPR             |               | carboxylesterase 2 [Mus musculus]                                                                   | 1477.7549 | 22.07  | 1.794984212 |
| 11230802 | MLDAEIVNTARPDEK           |               | actinin alpha 4 [Mus musculus]                                                                      | 1816.8789 | 22.34  | 0           |
| 6681157  | MLDMGFEPQIR               |               | DEAD (Asp-Glu-Ala-Asp) box polypeptide 5 [Mus musculus]                                             | 1336.6545 | 31.54  | 1.050833506 |
| 40068493 | MLDMGFEPQIR               |               | DEAD box polypeptide 17 isoform 1 [Mus musculus]                                                    | 1336.6545 | 31.54  | 1.050833506 |
| 6753620  | MLDMGFEPQIR               |               | DEAD/H (Asp-Glu-Ala-Asp/His) box polypeptide 3, X-linked [Mus musculus]                             | 1336.6545 | 31.54  | 1.050833506 |
| 7305505  | MLDQTTNFEER               |               | smoothelin [Mus musculus]                                                                           | 1383.6229 | 38.01  | 3.048541905 |
| 6679891  | MLDYLQSGSETPQTDIR         |               | alpha glucosidase 2 alpha neutral subunit [Mus musculus]                                            | 1923.9072 | 44.96  | 0.557266769 |
| 10092608 | MLLADQGGQSWK              |               | glutathione S-transferase, pi 1 [Mus musculus]                                                      | 1276.6366 | 38.28  | 0           |
| 6754084  | MLLEYDSSYDEK              |               | glutathione S-transferase, mu 1 [Mus musculus]                                                      | 1593.703  | 31.33  | 1.029781255 |



|          |                             |                  |                                                                                                     |           |        |             |
|----------|-----------------------------|------------------|-----------------------------------------------------------------------------------------------------|-----------|--------|-------------|
| 31982290 | MLYDMENPPADDYFGR            |                  | LIM domain containing preferred translocation partner in lipoma [Mus musculus]                      | 1933.8114 | 57.16  | 1.398526811 |
| 31981273 | MMEVAADVQR                  |                  | CNDP dipeptidase 2 (metallopeptidase M20 family) [Mus musculus]                                     | 1220.5759 | 21.34  | 1.14371136  |
| 6754036  | MNLGVGAYR                   |                  | glutamate oxaloacetate transaminase 2, mitochondrial [Mus musculus]                                 | 980.5053  | 21.27  | 1.254712421 |
| 63556656 | MPDGSMLVHQK                 |                  | PREDICTED: RIKEN cDNA A430096B05 gene [Mus musculus]                                                | 1242.5939 | 32.67  | 0           |
| 6996911  | MPEFYNR                     |                  | argininosuccinate synthetase [Mus musculus]                                                         | 956.4396  | 24.29  | 0.827311089 |
| 6679465  | MPPYDEETQAIIDAAQEAR         |                  | protein kinase C substrate 80K-H [Mus musculus]                                                     | 2147.9966 | 90.4   | 0.844225307 |
| 6678359  | MPTPPSYK                    |                  | transketolase [Mus musculus]                                                                        | 920.4526  | 35.68  | 1.15888033  |
| 6678726  | MQEVYFNAINNSEIR             |                  | leukotriene A4 hydrolase [Mus musculus]                                                             | 1941.9152 | 43.05  | 1.232376282 |
| 21704156 | MQNDSAENETAEGEEKR           | Deamidation (NQ) | caldesmon 1 [Mus musculus]                                                                          | 1938.8004 | 51.43  | 0           |
| 8394269  | MQQFDDLFR                   |                  | ST6 (alpha-N-acetyl-neuraminyl-2,3-beta-galactosyl-1,3)-N-acetylgalactosaminide alpha-2,6-sialyltra | 1199.5535 | 36.23  | 1.118483826 |
| 20137006 | MQQNIQELEEQLLEESAR          |                  | myosin, heavy polypeptide 9, non-muscle [Mus musculus]                                              | 2333.0564 | 111    | 0.946761979 |
| 50355692 | MQQLDEYQELLDIK              |                  | lamin A isoform A [Mus musculus]                                                                    | 1893.9268 | 90.27  | 1.243009713 |
| 13385356 | MREDYDSVEQDGDPEGPQR         |                  | RNA binding motif protein 8a [Mus musculus]                                                         | 2222.9355 | 33.07  | 0.769309644 |
| 6679108  | MSVQPTVSLGGFEITPPVLR        |                  | nucleophosmin 1 [Mus musculus]                                                                      | 2227.2205 | 45.32  | 0.942171972 |
| 6679108  | MTDQEAIQDLWQWR              |                  | nucleophosmin 1 [Mus musculus]                                                                      | 1819.8541 | 61.63  | 0.711738702 |
| 56119103 | MTGSEFDFEEMKR               |                  | guanosine diphosphate (GDP) dissociation inhibitor 3 [Mus musculus]                                 | 1606.6969 | 42.25  | 1.180587029 |
| 6678573  | MVDDGSGEVQVWR               |                  | villin 1 [Mus musculus]                                                                             | 1477.6771 | 68.13  | 1.47344132  |
| 33859811 | MVGVPAAFDMMLTGR             |                  | hydroxyacyl-Coenzyme A dehydrogenase/3-ketoacyl-Coenzyme A thiolase/enoyl-Coenzyme A hydratase (tri | 1595.7811 | 21.59  | 1.795352197 |
| 6753438  | MYDSSLALPQDLQAAR            |                  | claudin 3 [Mus musculus]                                                                            | 1804.9321 | 25.87  | 1.540400058 |
| 8393144  | MYDSVLALPGALQATR            |                  | claudin 7 [Mus musculus]                                                                            | 1705.9006 | 59.75  | 1.541391125 |
| 13384828 | MYGADLAPVDFLHASEDAR         |                  | serine (or cysteine) proteinase inhibitor, clade B, member 1a [Mus musculus]                        | 2077.9673 | 73.43  | 1.077468967 |
| 6677871  | MYLETDPSPR                  |                  | scinderin [Mus musculus]                                                                            | 1168.535  | 33.92  | 0.298820411 |
| 6753294  | NAGNEQDLGIQYK               |                  | catenin alpha 1 [Mus musculus]                                                                      | 1449.6974 | 35.5   | 0           |
| 30023842 | NAPAIIFIDELDAIAPK           |                  | valosin containing protein [Mus musculus]                                                           | 1811.0021 | 113.69 | 0.98988666  |
| 31982275 | NAVVEEYVEMR                 |                  | heat shock protein 4 [Mus musculus]                                                                 | 1402.6425 | 23.43  | 0.8361727   |
| 6754256  | NAVITVPAYFNDSQR             |                  | heat shock protein 9A [Mus musculus]                                                                | 1694.8562 | 60.98  | 0.881281985 |
| 18079339 | NAVITQEFQVDPDAR             |                  | aconitase 2, mitochondrial [Mus musculus]                                                           | 1601.8002 | 110.4  | 1.643002681 |
| 31560543 | NDFTEEEEAQVR                |                  | S-phase kinase-associated protein 1A [Mus musculus]                                                 | 1466.6458 | 58.12  | 0.972107327 |
| 9790067  | NDISSHPPVEGSYAPR            |                  | staphylococcal nuclease domain containing 1 [Mus musculus]                                          | 1725.8159 | 56.65  | 0.735253364 |
| 33667042 | NDQDTWDYTNPNLSGGQDPPGSPNPKR |                  | heterogeneous nuclear ribonucleoprotein L [Mus musculus]                                            | 2890.2673 | 88.65  | 0.835795595 |
| 9790247  | NDVFDLSGISPDLLPDDFVR        |                  | ubiquitin-like 1 (sentrin) activating enzyme subunit 1 [Mus musculus]                               | 2234.0999 | 20.03  | 1.623104905 |
| 9790247  | NDVFDLSGISPDLLPDDFVR        | Deamidation (NQ) | ubiquitin-like 1 (sentrin) activating enzyme subunit 1 [Mus musculus]                               | 2235.1089 | 28.99  | 0           |
| 21313536 | NDVITVQTPAFAESVTEGDVR       |                  | dihydroliipoamide S-succinyltransferase (E2 component of 2-oxo-glutarate complex) [Mus musculus]    | 2248.0999 | 51.44  | 1.333584525 |
| 31981722 | NELESYAYSLLK                |                  | heat shock 70kD protein 5 (glucose-regulated protein) [Mus musculus]                                | 1316.6385 | 45.02  | 0.923922755 |
| 24429590 | NELTYQMEQDHNLSVQLQER        |                  | DEAH (Asp-Glu-Ala-His) box polypeptide 9 [Mus musculus]                                             | 2475.1587 | 27.45  | 1.176173436 |
| 13384720 | NFDFFEDVFVNIPIR             |                  | NADH dehydrogenase (ubiquinone) 1 alpha subcomplex, 9 [Mus musculus]                                | 1611.7881 | 54.85  | 1.313888329 |
| 7305443  | NFGIGQDIQPK                 |                  | ribosomal protein L7a [Mus musculus]                                                                | 1216.6298 | 62.25  | 0           |
| 7949051  | NFILDQTNV9AAAQR             |                  | heterogenous nuclear ribonucleoprotein U [Mus musculus]                                             | 1647.8462 | 98.21  | 0.968302573 |
| 20137006 | NFINNPLAQADWAAK             |                  | myosin, heavy polypeptide 9, non-muscle [Mus musculus]                                              | 1672.8441 | 52.51  | 1.074569756 |
| 51556274 | NFLASQVPPFSR                |                  | hydroxyacyl-Coenzyme A dehydrogenase type II [Mus musculus]                                         | 1362.7238 | 45.89  | 1.223286589 |
| 33859490 | NFLTEDSADLDSIEAVANEVLK      |                  | laminin B1 subunit 1 [Mus musculus]                                                                 | 2393.1604 | 42.58  | 1.081994901 |
| 7305295  | NFMNSPMAQADWVAK             |                  | myosin, heavy polypeptide 11, smooth muscle [Mus musculus]                                          | 1709.7795 | 80.01  | 2.08550662  |
| 22203747 | NFVINVVNR                   |                  | procollagen, type VI, alpha 2 [Mus musculus]                                                        | 1074.6012 | 31.05  | 0           |
| 6681157  | NFYQEHPDLAR                 |                  | DEAD (Asp-Glu-Ala-Asp) box polypeptide 5 [Mus musculus]                                             | 1389.6592 | 34.98  | 0.99112462  |
| 34328108 | NGDRGETGPAAGPAGPIGPAGAR     |                  | procollagen, type I, alpha 1 [Mus musculus]                                                         | 1974.9812 | 50.05  | 0.523636068 |
| 51771420 | NGEDLGVAFR                  |                  | PREDICTED: hypothetical protein LOC68693 [Mus musculus]                                             | 1077.5327 | 23.26  | 0           |
| 7304993  | NGPALQEAYVR                 |                  | drebrin-like [Mus musculus]                                                                         | 1217.6311 | 33.03  | 0.905302796 |
| 46358078 | NGQEETVGVSTQLIR             |                  | response to metastatic cancers 1 [Mus musculus]                                                     | 1717.8794 | 32.45  | 0.973815503 |
| 18875368 | NGQLENPR                    | Deamidation (NQ) | myotubularin related protein 4 [Mus musculus]                                                       | 1041.5499 | 21.24  | 0           |
| 31981327 | NGYELSPTAAANFTR             |                  | proteasome (prosome, macropain) subunit, beta type 2 [Mus musculus]                                 | 1611.7808 | 36.45  | 0           |
| 20806532 | NGYGFINR                    | Deamidation (NQ) | cold shock domain protein A short isoform [Mus musculus]                                            | 941.4564  | 21.28  | 0           |
| 6756033  | NGYGFINR                    | Deamidation (NQ) | nuclease sensitive element binding protein 1 [Mus musculus]                                         | 941.4564  | 21.28  | 0           |
| 63562136 | NGYGFINR                    | Deamidation (NQ) | PREDICTED: hypothetical protein LOC78552 [Mus musculus]                                             | 941.4564  | 21.28  | 0           |
| 8567336  | NHNQEAQNDQNQR               |                  | chloride channel calcium activated 3 [Mus musculus]                                                 | 1564.6915 | 29.21  | 0           |
| 58037546 | NILGGTVFR                   |                  | isocitrate dehydrogenase 1 (NADP+), soluble [Mus musculus]                                          | 976.563   | 46.95  | 1.293046268 |
| 27370516 | NILGGTVFR                   |                  | isocitrate dehydrogenase 2 (NADP+), mitochondrial [Mus musculus]                                    | 976.563   | 46.95  | 1.293046268 |
| 31542333 | NINADEAAAMGAVYQAAALS        |                  | hypoxia up-regulated 1 [Mus musculus]                                                               | 2079.0024 | 46.29  | 5.298119773 |
| 31543605 | NIQVDSPYDISR                |                  | ribophorin I [Mus musculus]                                                                         | 1406.6935 | 62.73  | 0.918575998 |
| 33563250 | NISEAEWYK                   |                  | desmin [Mus musculus]                                                                               | 1268.5824 | 60.94  | 1.755138375 |
| 34996495 | NIVEEIEDLVAR                |                  | ribophorin II [Mus musculus]                                                                        | 1399.7488 | 49.23  | 0.853217155 |

|          |                         |                  |                                                                                                      |           |        |             |
|----------|-------------------------|------------------|------------------------------------------------------------------------------------------------------|-----------|--------|-------------|
| 23956222 | NIVLSGGSTMFR            |                  | ARP3 actin-related protein 3 homolog [Mus musculus]                                                  | 1281.6639 | 39.03  | 1.152660318 |
| 6755901  | NLDIERPTYTNLNR          |                  | tubulin, alpha 1 [Mus musculus]                                                                      | 1718.8898 | 42.15  | 1.002729228 |
| 34740335 | NLDIERPTYTNLNR          |                  | tubulin, alpha 2 [Mus musculus]                                                                      | 1718.8898 | 42.15  | 1.002729228 |
| 6678467  | NLDIERPTYTNLNR          |                  | tubulin, alpha 4 [Mus musculus]                                                                      | 1718.8898 | 42.15  | 1.002729228 |
| 6678469  | NLDIERPTYTNLNR          |                  | tubulin, alpha 6 [Mus musculus]                                                                      | 1718.8898 | 42.15  | 1.002729228 |
| 482387   | NLDLDSIIAEVK            |                  | keratin, 67K type II epidermal - human                                                               | 1329.7258 | 51.2   | 0           |
| 1346345  | NLDLDSIIAEVK            |                  | Keratin, type II cytoskeletal 6B (Cytokeratin 6B) (CK 6B) (K6b keratin)                              | 1329.7258 | 51.2   | 0           |
| 28173550 | NLEGVYGFANLPNQVYR       |                  | cell division cycle 10 homolog [Mus musculus]                                                        | 1953.9785 | 37.41  | 1.324509325 |
| 58037267 | NLEPEWAAAATEVK          |                  | protein disulfide isomerase-associated 6 [Mus musculus]                                              | 1528.7703 | 66.29  | 0           |
| 22203747 | NLEWIAGGTWTPSALK        |                  | procollagen, type VI, alpha 2 [Mus musculus]                                                         | 1743.8939 | 55.13  | 0           |
| 6678499  | NLFFSTNIDDAIR           |                  | UDP-glucose dehydrogenase [Mus musculus]                                                             | 1525.771  | 37.34  | 1.408655159 |
| 40254595 | NLHQSGFSLSGAQIDDNIPR    |                  | dihydropyrimidinase-like 2 [Mus musculus]                                                            | 2169.074  | 24.45  | 3.912902145 |
| 9790067  | NLPGLVQEGEPFSEEAFLTK    |                  | staphylococcal nuclease domain containing 1 [Mus musculus]                                           | 2306.1594 | 36     | 1.326000852 |
| 20137006 | NLPIYSEEIVMYK           |                  | myosin, heavy polypeptide 9, non-muscle [Mus musculus]                                               | 1727.8513 | 38.48  | 0.815394532 |
| 31982755 | NLQEAEEWYK              |                  | vimentin [Mus musculus]                                                                              | 1309.6063 | 46.02  | 1.233167217 |
| 6678365  | NLQYYDISAK              |                  | RAN, member RAS oncogene family [Mus musculus]                                                       | 1214.6083 | 48.16  | 1.473588803 |
| 6678359  | NMAEQIIEIYSQVQSK        |                  | transketolase [Mus musculus]                                                                         | 2009.005  | 70.67  | 1.055783401 |
| 20137006 | NMDPLNDNIATLLHQSSDK     |                  | myosin, heavy polypeptide 9, non-muscle [Mus musculus]                                               | 2126.0166 | 57.53  | 0.834024339 |
| 29336026 | NMDPLNDNVAALLHQSTDR     |                  | nonmuscle myosin heavy chain [Mus musculus]                                                          | 2124.02   | 27.96  | 1.138510315 |
| 7305295  | NMDPLNDNVTLLNASSDK      |                  | myosin, heavy polypeptide 11, smooth muscle [Mus musculus]                                           | 2047.9565 | 86.17  | 1.503993881 |
| 7949053  | NMGPGYGGGNYGPGSGGGGGYGR |                  | heterogeneous nuclear ribonucleoprotein A2/B1 isoform 1 [Mus musculus]                               | 2189.9084 | 181.5  | 0.964300098 |
| 7949053  | NMGPGYGGGNYGPGSGGGGGYGR | Deamidation (NQ) | heterogeneous nuclear ribonucleoprotein A2/B1 isoform 1 [Mus musculus]                               | 2190.8992 | 80.1   | 1.282256674 |
| 7949053  | NMGPGYGGGNYGPGSGGGGGYGR | Oxidation (M)    | heterogeneous nuclear ribonucleoprotein A2/B1 isoform 1 [Mus musculus]                               | 2205.8945 | 55.82  | 1.021237534 |
| 1346343  | NMQDMVEDYR              |                  | Keratin, type II cytoskeletal 1 (Cytokeratin 1) (K1) (CK 1) (67 kDa cyto keratin) (Hair alpha protei | 1300.5502 | 28.03  | 0           |
| 7242197  | NMQNVEHVPLTLDR          |                  | proteasome (prosome, macropain) subunit, beta type 1 [Mus musculus]                                  | 1665.8335 | 43.58  | 1.303401168 |
| 21450277 | NMVPQQALVIR             |                  | Na+/K+ -ATPase alpha 1 subunit [Mus musculus]                                                        | 1268.7175 | 46.68  | 1.12993734  |
| 6754556  | NMYEEINETR              |                  | lamin B1 [Mus musculus]                                                                              | 1427.6154 | 44.11  | 0.403886079 |
| 6678145  | NNEDVSIIPPLFTVSDHR      |                  | signal sequence receptor, delta [Mus musculus]                                                       | 2152.0994 | 33.13  | 1.029705766 |
| 31980868 | NNFLEDEPSAQR            |                  | kallikrein 6 [Mus musculus]                                                                          | 1556.7217 | 33.94  | 0.604717043 |
| 51491845 | NNLAGAEELFAR            |                  | clathrin, heavy polypeptide (Hc) [Mus musculus]                                                      | 1304.6672 | 54.75  | 1.35089711  |
| 6679583  | NNLSFIETSLDSTNVVEAFK    |                  | RAB11B, member RAS oncogene family [Mus musculus]                                                    | 2329.104  | 34.76  | 0           |
| 6679515  | NNQFQALLQYADPVSQAQAK    |                  | polypyrimidine tract binding protein 1 [Mus musculus]                                                | 2243.0845 | 32.69  | 0           |
| 22203747 | NNYATMRPDSTEIQDTINR     |                  | procollagen, type VI, alpha 2 [Mus musculus]                                                         | 2354.0771 | 59.83  | 0.552043425 |
| 22203747 | NNYATMRPDSTEIQDTINR     | Deamidation (NQ) | procollagen, type VI, alpha 2 [Mus musculus]                                                         | 2355.0569 | 53     | 0           |
| 63530525 | NPAVLSAASFDR            |                  | PREDICTED: SEC31-like 1 [Mus musculus]                                                               | 1304.6649 | 26.86  | 0           |
| 6754254  | NPDDITNEEYGEFYK         |                  | heat shock protein 1, alpha [Mus musculus]                                                           | 1833.7855 | 104.09 | 1.171946927 |
| 40556608 | NPDDITQEEYGEFYK         |                  | heat shock protein 1, beta [Mus musculus]                                                            | 1847.7974 | 107.07 | 0.939350043 |
| 51827543 | NPEILAIAPVLLDALDPSR     |                  | PREDICTED: GCN1 general control of amino-acid synthesis 1-like 1 [Mus musculus]                      | 2118.1721 | 23.14  | 0           |
| 63518159 | NPELQNLLLDDFFK          |                  | PREDICTED: phosphogluconate dehydrogenase [Mus musculus]                                             | 1705.8817 | 77.09  | 1.112586487 |
| 63556656 | NPNDDLTAVGGKPEGWK       |                  | PREDICTED: RIKEN cDNA A430096B05 gene [Mus musculus]                                                 | 1797.8743 | 114.63 | 0.230105826 |
| 8567402  | NPPGFAFVFEEDPR          |                  | splicing factor, arginine/serine-rich 3 (SRp20) [Mus musculus]                                       | 1621.7673 | 51.72  | 1.086317948 |
| 18875324 | NQAPGQPGASQWGSR         |                  | DAZ associated protein 1 [Mus musculus]                                                              | 1540.7301 | 43.92  | 0           |
| 13384622 | NQEAGHEAAGEEAAEASGPPEK  |                  | Ly1 antibody reactive clone [Mus musculus]                                                           | 2178.9595 | 66.88  | 0           |
| 6754220  | NQGGYGGSSSSSYGSGR       |                  | heterogeneous nuclear ribonucleoprotein A1 [Mus musculus]                                            | 1694.7068 | 25.27  | 1.143608551 |
| 33563270 | NQGYDYVKPR              |                  | oxoglutarate dehydrogenase (lipoamide) [Mus musculus]                                                | 1402.6774 | 46.28  | 1.698857961 |
| 547749   | NQILNLTDDANILLQIDNAR    |                  | Keratin, type I cytoskeletal 10 (Cytokeratin 10) (K10) (CK 10)                                       | 2367.2588 | 61.35  | 0.223318695 |
| 31981722 | NQLTSNPENTVFDK          |                  | heat shock 70kD protein 5 (glucose-regulated protein) [Mus musculus]                                 | 1677.8081 | 96.01  | 0.958159011 |
| 6754482  | NQNINLENSLGDVEAR        |                  | keratin complex 1, acidic, gene 18 [Mus musculus]                                                    | 1785.8735 | 122.05 | 0           |
| 31981690 | NQVAMNPTNTVFDK          |                  | heat shock protein 8 [Mus musculus]                                                                  | 1649.7847 | 73.31  | 0.944736643 |
| 33563282 | NQYDNDVTWVSPQGR         |                  | proteasome (prosome, macropain) subunit, alpha type 1 [Mus musculus]                                 | 1778.814  | 36.47  | 0.931841038 |
| 31981647 | NSEPEEIVPSR             |                  | tyrosyl-tRNA synthetase [Mus musculus]                                                               | 1256.6145 | 31.97  | 1.464587219 |
| 46849705 | NSFMNGSWGAEER           |                  | lectin, galactose binding, soluble 4 [Mus musculus]                                                  | 1484.6276 | 99.13  | 1.255850986 |
| 63621835 | NSGSPYGGGYSGGGGGGYGR    | Deamidation (NQ) | PREDICTED: similar to heterogeneous nuclear ribonucleoprotein A3 [Mus musculus]                      | 1938.7904 | 28.87  | 1.125866977 |
| 31981690 | NSLESYAFNMK             |                  | heat shock protein 8 [Mus musculus]                                                                  | 1303.6042 | 55.93  | 0           |
| 7305295  | NSLQDQLDEEMK            |                  | myosin, heavy polypeptide 11, smooth muscle [Mus musculus]                                           | 1649.7383 | 73.31  | 2.367817169 |
| 33598964 | NSLQEQEEEEEAR           |                  | myosin heavy chain 10, non-muscle [Mus musculus]                                                     | 1718.7445 | 33.25  | 0           |
| 54020742 | NSNILEDLETLR            |                  | archain 1 [Mus musculus]                                                                             | 1416.7375 | 59.57  | 1.045114976 |
| 50355692 | NSNLVGAHEELQQSR         |                  | lamin A isoform A [Mus musculus]                                                                     | 1752.8674 | 84.17  | 1.016324903 |
| 22165384 | NSSYFVEWIPNNVK          |                  | tubulin, beta, 2 [Mus musculus]                                                                      | 1696.8168 | 32.4   | 0.855148188 |
| 12963615 | NSSYFVEWIPNNVK          |                  | tubulin, beta 3 [Mus musculus]                                                                       | 1696.8168 | 32.4   | 0.855148188 |

|          |                               |                  |                                                                                                     |           |        |             |
|----------|-------------------------------|------------------|-----------------------------------------------------------------------------------------------------|-----------|--------|-------------|
| 31981939 | NSSYFVEWIPNNVK                |                  | tubulin, beta 4 [Mus musculus]                                                                      | 1696.8168 | 32.4   | 0.855148188 |
| 7106439  | NSSYFVEWIPNNVK                |                  | tubulin, beta 5 [Mus musculus]                                                                      | 1696.8168 | 32.4   | 0.855148188 |
| 27754056 | NSSYFVEWIPNNVK                |                  | tubulin, beta 6 [Mus musculus]                                                                      | 1696.8168 | 32.4   | 0.855148188 |
| 21746161 | NSSYFVEWIPNNVK                |                  | tubulin, beta [Mus musculus]                                                                        | 1696.8168 | 32.4   | 0.855148188 |
| 6996917  | NSYVAGQYDDAASYK               |                  | glucose-6-phosphate dehydrogenase X-linked [Mus musculus]                                           | 1651.7192 | 75.03  | 1.454058157 |
| 31981562 | NTGIICTIGPASR                 |                  | pyruvate kinase 3 [Mus musculus]                                                                    | 1302.6726 | 20.13  | 0.865701901 |
| 22164798 | NTGTEAPDYLATVDVDPK            |                  | selenium binding protein 1 [Mus musculus]                                                           | 1905.9156 | 65.68  | 4.000396306 |
| 46195798 | NTLLIAGLQAR                   |                  | doilchyl-di-phosphooligosaccharide-protein glycotransferase [Mus musculus]                          | 1169.704  | 34.49  | 0           |
| 33563270 | NTNAGAPPGTAYQSPLSLSR          |                  | oxoglutarate dehydrogenase (lipoamide) [Mus musculus]                                               | 2001.9951 | 54.9   | 1.220850933 |
| 33859560 | NTNDANSCQIIIPQNQVNR           |                  | guanosine diphosphate (GDP) dissociation inhibitor 1 [Mus musculus]                                 | 2142.0359 | 77.68  | 1.074650291 |
| 56119103 | NTNDANSCQIIIPQNQVNR           |                  | guanosine diphosphate (GDP) dissociation inhibitor 3 [Mus musculus]                                 | 2142.0359 | 77.68  | 1.074650291 |
| 6754556  | NTSEQDQPMGGWEMIR              |                  | lamin B1 [Mus musculus]                                                                             | 1878.8158 | 74.32  | 0.587126951 |
| 8567336  | NVAILIPESWK                   |                  | chloride channel calcium activated 3 [Mus musculus]                                                 | 1269.7231 | 49.38  | 0.194573528 |
| 6680678  | NVDEAINFINDR                  |                  | aldehyde dehydrogenase family 3, subfamily A2 [Mus musculus]                                        | 1419.6921 | 60.52  | 1.484174044 |
| 31981570 | NVDLQVLAPEPELLYK              |                  | polymeric immunoglobulin receptor [Mus musculus]                                                    | 1840.9922 | 30.52  | 1.478440418 |
| 27552760 | NVDLSTFYQNR                   |                  | translocase of outer mitochondrial membrane 70 homolog A [Mus musculus]                             | 1356.6589 | 21.07  | 1.047401023 |
| 6753364  | NVFDEAILAALEPPEPK             |                  | cell division cycle 42 homolog [Mus musculus]                                                       | 1852.9633 | 65.32  | 1.145543053 |
| 6753364  | NVFDEAILAALEPPEPK             | Deamidation (NQ) | cell division cycle 42 homolog [Mus musculus]                                                       | 1853.9373 | 25.82  | 0           |
| 26986563 | NVPVYKPTLDTQR                 |                  | choline dehydrogenase [Mus musculus]                                                                | 1658.8907 | 30.09  | 1.05370276  |
| 13994195 | NVQLTENEIR                    |                  | protein phosphatase 1, catalytic subunit, alpha [Mus musculus]                                      | 1215.6284 | 22.33  | 0.446071928 |
| 13385168 | NVVSQFVSSMSASADVLAMSK         |                  | ubiquinol-cytochrome c reductase, Rieske iron-sulfur polypeptide 1 [Mus musculus]                   | 2158.0479 | 64.04  | 1.392727789 |
| 31543113 | NWMNSLGVNPR                   |                  | lymphocyte cytosolic protein 1 [Mus musculus]                                                       | 1287.6343 | 30.13  | 6.262900611 |
| 21450323 | NYILDQTNVYGSQAR               |                  | EIB-55kDa associated protein 5 [Mus musculus]                                                       | 1741.8455 | 33.17  | 1.543250264 |
| 6756033  | NYQQNYQNSESGEKNEGSESAPEGQAQQR |                  | nuclease sensitive element binding protein 1 [Mus musculus]                                         | 3257.3867 | 119.59 | 0.972539538 |
| 7949053  | NYYEQWKG                      |                  | heterogeneous nuclear ribonucleoprotein A2/B1 isoform 1 [Mus musculus]                              | 1087.4935 | 43.79  | 0.943813005 |
| 51771420 | NYYGYQGYR                     |                  | PREDICTED: hypothetical protein LOC68693 [Mus musculus]                                             | 1183.5162 | 38.73  | 1.231417633 |
| 58037109 | PDSWDKDVYPEPPSR               |                  | NADH dehydrogenase (ubiquinone) 1 beta subcomplex, 10 [Mus musculus]                                | 1787.828  | 34.28  | 1.654588446 |
| 6753618  | PFVELETNLPASR                 |                  | D-dopachrome tautomerase [Mus musculus]                                                             | 1472.7689 | 32.67  | 0           |
| 6671549  | PGLLLDGEAPNFEANTTIGR          |                  | peroxiredoxin 6 [Mus musculus]                                                                      | 2142.0872 | 91.37  | 3.259932386 |
| 10092608 | PPYTIYFVPR                    |                  | glutathione S-transferase, pi 1 [Mus musculus]                                                      | 1351.7468 | 29.34  | 1.917064476 |
| 6680842  | QAALQVADGFISR                 |                  | gelsolin-like capping protein [Mus musculus]                                                        | 1375.7418 | 32.42  | 1.10713282  |
| 7305295  | QADLEKEELAEELASSLSGR          |                  | myosin, heavy polypeptide 11, smooth muscle [Mus musculus]                                          | 2175.0813 | 132.76 | 1.65270755  |
| 7305295  | QADLEKEELAEELASSLSGR          | Deamidation (NQ) | myosin, heavy polypeptide 11, smooth muscle [Mus musculus]                                          | 2176.0911 | 65.99  | 1.369702094 |
| 6754482  | QAQYEALLNIK                   |                  | keratin complex 1, acidic, gene 18 [Mus musculus]                                                   | 1419.7476 | 78.34  | 0           |
| 6754256  | QAVTNPNTFYATK                 |                  | heat shock protein 9A [Mus musculus]                                                                | 1568.7604 | 23.25  | 1.616723417 |
| 6996913  | QDIAFAYQR                     |                  | annexin A2 [Mus musculus]                                                                           | 1111.5583 | 66.67  | 1.250634769 |
| 31791057 | QDIAVISDSYFPR                 |                  | laminin, gamma 1 [Mus musculus]                                                                     | 1510.7485 | 23.36  | 0           |
| 6753294  | QDLLAYLQR                     |                  | catenin alpha 1 [Mus musculus]                                                                      | 1119.6156 | 23.92  | 0           |
| 6753296  | QDLLAYLQR                     |                  | catenin alpha 2 isoform 2 [Mus musculus]                                                            | 1119.6156 | 23.92  | 0           |
| 31982275 | QDLPALAEKPR                   |                  | heat shock protein 4 [Mus musculus]                                                                 | 1295.6959 | 38.67  | 0           |
| 6671571  | QDLPNAMAAEITDK                |                  | ADP-ribosylation factor 2 [Mus musculus]                                                            | 1630.7749 | 34.01  | 4.49614766  |
| 63489754 | QEAFLLNEDLGDSDLSEVALLK        |                  | PREDICTED: similar to Spectrin alpha chain, brain (Spectrin, non-erythroid alpha chain) (Alpha-II s | 2419.2166 | 61.1   | 0.948283179 |
| 63574590 | QEAGAQQPTR                    |                  | PREDICTED: RIKEN cDNA 4930565N07 [Mus musculus]                                                     | 1085.5157 | 22.22  | 0           |
| 55742711 | QEELESVEAGVQGGAFEGTR          |                  | EH-domain containing 2 [Mus musculus]                                                               | 2092.9856 | 35.84  | 1.392970539 |
| 30794206 | QEEMNQQEEEEEMETDTR            |                  | splicing factor 3b, subunit 2 [Mus musculus]                                                        | 2242.8799 | 84.15  | 1.285887476 |
| 41322904 | QEEVYSELQAR                   |                  | plectin 1 isoform 1 [Mus musculus]                                                                  | 1351.6481 | 23.83  | 1.699011658 |
| 6679599  | QETEVELYNEFPPIK               |                  | RAB7, member RAS oncogene family [Mus musculus]                                                     | 1964.9478 | 44.81  | 0.879125109 |
| 7304993  | QEWESAGQQAPHPR                |                  | drebrin-like [Mus musculus]                                                                         | 1620.7592 | 55.47  | 2.103977155 |
| 6671507  | QEYDEAGPSIVHR                 |                  | actin, alpha 2, smooth muscle, aorta [Mus musculus]                                                 | 1500.7147 | 100.53 | 1.149045186 |
| 6671509  | QEYDESGPSIVHR                 |                  | actin, beta, cytoplasmic [Mus musculus]                                                             | 1516.7108 | 72.08  | 1.016697257 |
| 33859482 | QFAEMYVAK                     |                  | eukaryotic translation elongation factor 2 [Mus musculus]                                           | 1086.5331 | 21.2   | 1.231888111 |
| 63476037 | QFQVAPLTIAR                   |                  | PREDICTED: procollagen, type VI, alpha 3 [Mus musculus]                                             | 1172.6857 | 45.67  | 0.785022987 |
| 21450625 | QFYINVER                      |                  | eukaryotic translation initiation factor 4A1 [Mus musculus]                                         | 1068.552  | 31.66  | 0.828750771 |
| 51771446 | QFYINVER                      |                  | PREDICTED: similar to eukaryotic translation initiation factor 4A, isoform 1 [Mus musculus]         | 1068.552  | 31.66  | 0.828750771 |
| 22164798 | QFYPDLIR                      |                  | selenium binding protein 1 [Mus musculus]                                                           | 1051.5673 | 31.66  | 2.391996458 |
| 6753086  | QGFQELLQAVPLADSR              |                  | apurinic/apurimidinic endonuclease 1 [Mus musculus]                                                 | 1847.9674 | 38.51  | 1.03206314  |
| 6680748  | QGQYSPMAIEEQVAVIYAGVR         |                  | ATP synthase, H+ transporting, mitochondrial F1 complex, alpha subunit, isoform 1 [Mus musculus]    | 2309.1584 | 40.96  | 1.256287279 |
| 9845299  | QGFHSHQQALEYGTK               |                  | succinate-CoA ligase, GDP-forming, alpha subunit [Mus musculus]                                     | 1694.8107 | 92.09  | 1.041915792 |
| 453155   | QGVADINGLR                    |                  | keratin 9 [Homo sapiens]                                                                            | 1157.5957 | 57.57  | 1.440835877 |
| 6753294  | QIIVDPLSFSEER                 |                  | catenin alpha 1 [Mus musculus]                                                                      | 1532.8011 | 30.45  | 1.189783168 |

|          |                            |                                   |                                                                                                    |           |        |             |
|----------|----------------------------|-----------------------------------|----------------------------------------------------------------------------------------------------|-----------|--------|-------------|
| 18250296 | QINWTVLYR                  |                                   | ribosomal protein L24 [Mus musculus]                                                               | 1192.6578 | 23.36  | 0.884967588 |
| 16716471 | QIPVVGSLNWFSPVQASQK        |                                   | hypothetical protein LOC94184 [Mus musculus]                                                       | 2184.1477 | 37.98  | 1.185701921 |
| 31982526 | QIQEEITGNTAALSGR           |                                   | parvin, alpha [Mus musculus]                                                                       | 1745.8682 | 67.91  | 1.371561425 |
| 1346343  | QISNLQQSISDAEQR            |                                   | Keratin, type II cytoskeletal 1 (Cytokeratin 1) (K1) (CK 1) (67 kDa cytokeatin) (Hair alpha protei | 1716.8481 | 113.88 | 0.049606533 |
| 6754976  | QITINDLPVGR                |                                   | peroxiredoxin 1 [Mus musculus]                                                                     | 1225.6998 | 61.78  | 0.955521852 |
| 21704156 | QKEFDPTITDGSLSGSPR         |                                   | caldesmon 1 [Mus musculus]                                                                         | 1934.9435 | 56.61  | 1.638957073 |
| 41322904 | QLAEEDLAQQR                |                                   | plectin 1 isoform 1 [Mus musculus]                                                                 | 1300.6498 | 25.13  | 0           |
| 21312570 | QLDMILDEQR                 |                                   | lectin, mannose-binding, 1 [Mus musculus]                                                          | 1260.6284 | 21.81  | 0.692956403 |
| 6755354  | QLDSGLLLVTGPLVINR          |                                   | ribosomal protein L6 [Mus musculus]                                                                | 1808.0663 | 51.7   | 0.928703397 |
| 6755901  | QLFHPEQLITGK               |                                   | tubulin, alpha 1 [Mus musculus]                                                                    | 1410.7695 | 61.8   | 0           |
| 34740335 | QLFHPEQLITGK               |                                   | tubulin, alpha 2 [Mus musculus]                                                                    | 1410.7695 | 61.8   | 0           |
| 6678467  | QLFHPEQLITGK               |                                   | tubulin, alpha 4 [Mus musculus]                                                                    | 1410.7695 | 61.8   | 0           |
| 6678469  | QLFHPEQLITGK               |                                   | tubulin, alpha 6 [Mus musculus]                                                                    | 1410.7695 | 61.8   | 0           |
| 7305295  | QLHEYETELEDER              |                                   | myosin, heavy polypeptide 11, smooth muscle [Mus musculus]                                         | 1690.7576 | 92.33  | 1.942546152 |
| 7305295  | QLHEYETELEDERK             |                                   | myosin, heavy polypeptide 11, smooth muscle [Mus musculus]                                         | 1818.8501 | 73.97  | 1.881253033 |
| 7305295  | QLLQANPILEAFGNAK           |                                   | myosin, heavy polypeptide 11, smooth muscle [Mus musculus]                                         | 1726.9503 | 115.46 | 1.579149628 |
| 20137006 | QLLQANPILEAFGNAK           |                                   | myosin, heavy polypeptide 9, non-muscle [Mus musculus]                                             | 1726.9503 | 115.46 | 1.579149628 |
| 29336026 | QLLQANPILEAFGNAK           |                                   | nonmuscle myosin heavy chain [Mus musculus]                                                        | 1726.9503 | 115.46 | 1.579149628 |
| 7305295  | QLLQANPILEAFGNAK           | 2 Deamidation (NQ)                | myosin, heavy polypeptide 11, smooth muscle [Mus musculus]                                         | 1728.8949 | 21.49  | 0           |
| 20137006 | QLLQANPILEAFGNAK           | 2 Deamidation (NQ)                | myosin, heavy polypeptide 9, non-muscle [Mus musculus]                                             | 1728.8949 | 21.49  | 0           |
| 29336026 | QLLQANPILEAFGNAK           | 2 Deamidation (NQ)                | nonmuscle myosin heavy chain [Mus musculus]                                                        | 1728.8949 | 21.49  | 0           |
| 6678571  | QLLTLSNELSQAR              |                                   | villin 2 [Mus musculus]                                                                            | 1472.8094 | 44.27  | 0.909334076 |
| 22122569 | QLSQNFLDLR                 | 3 Deamidation (NQ)                | transcription factor B1, mitochondrial [Mus musculus]                                              | 1349.7091 | 30.52  | 0.932990864 |
| 56605979 | QLTEMLPSILNQLGADSLTSLR     |                                   | basic transcription factor 3 [Mus musculus]                                                        | 2400.2598 | 35.15  | 0.987713292 |
| 30519911 | QMEQISQFLQAAER             |                                   | transgelin 2 [Mus musculus]                                                                        | 1678.8307 | 39.32  | 1.206033368 |
| 6755714  | QMEQVAQFLK                 |                                   | transgelin [Mus musculus]                                                                          | 1221.6259 | 31.2   | 0.963348341 |
| 50355692 | QNGDDPLMTYR                |                                   | lamin A isoform A [Mus musculus]                                                                   | 1309.5895 | 30.12  | 1.716960493 |
| 29789245 | QNQLLLR                    | Deamidation (NQ)                  | centrosomal colon cancer autoantigen [Mus musculus]                                                | 1014.5604 | 29.86  | 0           |
| 30794450 | QPYAVSELAGHQTSAESWGTGR     |                                   | ribosomal protein L4 [Mus musculus]                                                                | 2332.0999 | 99.35  | 0.761389468 |
| 13507628 | QQEQTAQGTAPDAVDQQR         |                                   | LPS-responsive beige-like anchor [Mus musculus]                                                    | 1970.9191 | 103.66 | 1.399189521 |
| 29789189 | QQKQMLEMR                  | 3 Deamidation (NQ); Oxidation (M) | minichromosome maintenance protein 10 [Mus musculus]                                               | 1338.6207 | 22.55  | 0           |
| 14861854 | QQLETLQLDGGGR              |                                   | keratin complex 2, basic, gene 7 [Mus musculus]                                                    | 1357.712  | 51.33  | 0           |
| 6755763  | QQLSAEELDAQLDAYNAR         |                                   | THO complex 4 [Mus musculus]                                                                       | 2034.9965 | 52.47  | 1.284145144 |
| 7106421  | QQMLENQMEVR                |                                   | spectrin beta 2 isoform 2 [Mus musculus]                                                           | 1405.6567 | 30.12  | 2.440397001 |
| 41322904 | QQNLASYDYVR                |                                   | plectin 1 isoform 1 [Mus musculus]                                                                 | 1356.6637 | 27.76  | 2.694420898 |
| 31981828 | QQPLFVSGGDDYK              |                                   | coatamer protein complex subunit alpha [Mus musculus]                                              | 1453.6722 | 32.28  | 0           |
| 22550094 | QQPPDLVDFAVEYFTR           |                                   | protein kinase, cAMP dependent regulatory, type II alpha [Mus musculus]                            | 1924.954  | 25.78  | 0.918563561 |
| 13385878 | QQQFENLDQQLR               |                                   | sorting nexin 2 [Mus musculus]                                                                     | 1546.7609 | 29.35  | 0           |
| 21312968 | QQSEEDLLQDFSR              |                                   | signal sequence receptor, gamma [Mus musculus]                                                     | 1707.8229 | 104.78 | 0.746255689 |
| 63476037 | QQSLETAMSFVAR              |                                   | PREDICTED: procollagen, type VI, alpha 3 [Mus musculus]                                            | 1467.7311 | 33.66  | 0.813152855 |
| 13507696 | QRMQHILTPNQDARGQAETR       | Deamidation (NQ); Oxidation (M)   | vomeronal 1 receptor, D14 [Mus musculus]                                                           | 2367.1948 | 24.78  | 0           |
| 41322904 | QSAEEQAQAQAQAAQAAEK        |                                   | plectin 1 isoform 1 [Mus musculus]                                                                 | 1957.9249 | 102.31 | 1.325119668 |
| 6754508  | QSFTMVADTPENLR             |                                   | LIM and SH3 protein 1 [Mus musculus]                                                               | 1608.7708 | 48.58  | 0.966913382 |
| 8567336  | QSGAIHTVALGPAAAK           |                                   | chloride channel calcium activated 3 [Mus musculus]                                                | 1604.9021 | 99.45  | 0           |
| 547749   | QSLEASLAETEGR              |                                   | Keratin, type I cytoskeletal 10 (Cytokeratin 10) (K10) (CK 10)                                     | 1390.6871 | 101.25 | 0           |
| 30794412 | QSSYGQSQSYNNQGQQNTSSGGQGGR |                                   | TAF15 RNA polymerase II, TATA box binding protein (TBP)-associated factor [Mus musculus]           | 2747.1611 | 110.36 | 1.013031714 |
| 6753072  | QSVANGVEISVPVPSDADSPR      |                                   | adaptor protein complex AP-1, mu 2 subunit [Mus musculus]                                          | 2124.0486 | 78.43  | 1.349742823 |
| 6754480  | QSVEADINGLR                |                                   | keratin 13 [Mus musculus]                                                                          | 1201.6205 | 61.11  | 0           |
| 547749   | QSVEADINGLR                |                                   | Keratin, type I cytoskeletal 10 (Cytokeratin 10) (K10) (CK 10)                                     | 1201.6205 | 61.11  | 0           |
| 41322904 | QTNLENLDQAFSVAER           |                                   | plectin 1 isoform 1 [Mus musculus]                                                                 | 1834.8892 | 43.48  | 1.187666146 |
| 30023842 | QTNPSAMEVEEDDPVPEIR        |                                   | valosin containing protein [Mus musculus]                                                          | 2155.9856 | 63.84  | 0.927237936 |
| 7305291  | QTPAAPETEEPEYR             |                                   | metaxin 1 [Mus musculus]                                                                           | 1617.7418 | 61.33  | 1.210093371 |
| 50080209 | QTQTFTTYSYDNQPGVLIQVYEGER  |                                   | heat shock protein 1A [Mus musculus]                                                               | 2774.3257 | 67.27  | 1.060091338 |
| 31981690 | QTQTFTTYSYDNQPGVLIQVYEGER  |                                   | heat shock protein 8 [Mus musculus]                                                                | 2774.3257 | 67.27  | 1.060091338 |
| 6680606  | QTSAMSSFGGTGGGSR           |                                   | keratin complex 1, acidic, gene 19 [Mus musculus]                                                  | 1586.73   | 123.82 | 1.171361731 |
| 8567336  | QTTPMTAQPPAPTFSLQIGQR      |                                   | chloride channel calcium activated 3 [Mus musculus]                                                | 2383.2493 | 79.39  | 0.245852313 |
| 8567336  | QTTPMTAQPPAPTFSLQIGQR      | Oxidation (M)                     | chloride channel calcium activated 3 [Mus musculus]                                                | 2399.2378 | 55.36  | 0.283255407 |
| 13507656 | QWTWDEGSVSR                |                                   | type 1 tumor necrosis factor receptor shedding aminopeptidase regulator [Mus musculus]             | 1394.6223 | 48.57  | 1.105966863 |
| 22267442 | QVAEQFLNMR                 |                                   | ubiquinol cytochrome c reductase core protein 2 [Mus musculus]                                     | 1235.625  | 26.1   | 1.111121196 |

|          |                            |                    |                                                                                                     |           |        |             |
|----------|----------------------------|--------------------|-----------------------------------------------------------------------------------------------------|-----------|--------|-------------|
| 6677935  | QVDENWYEGR                 |                    | sorbin and SH3 domain containing 1 [Mus musculus]                                                   | 1295.571  | 24.21  | 0           |
| 28316750 | QVHPDTGISSK                |                    | histone 1, H2ba [Mus musculus]                                                                      | 1168.5974 | 64.74  | 0.560447384 |
| 20874851 | QVHPDTGISSK                |                    | PREDICTED: similar to histone H2b-616 [Mus musculus]                                                | 1168.5974 | 64.74  | 0.560447384 |
| 22122789 | QVLLSEPQEAAALYR            |                    | acylpeptide hydrolase [Mus musculus]                                                                | 1687.9027 | 36.16  | 1.025919744 |
| 31981555 | QVVEAVQAPVQERPEAEER        |                    | ladinin [Mus musculus]                                                                              | 2293.146  | 31.97  | 1.537363337 |
| 63562723 | QVVNIPSFIVR                |                    | PREDICTED: similar to 40S ribosomal protein S9 [Mus musculus]                                       | 1271.7545 | 44.17  | 0.963287771 |
| 6678573  | QVVVEGQEPANFWMALGGK        |                    | villin 1 [Mus musculus]                                                                             | 2059.998  | 21.35  | 1.254731377 |
| 21313162 | QWLQEIDR                   |                    | RAB1B, member RAS oncogene family [Mus musculus]                                                    | 1087.5631 | 24.94  | 1.382551637 |
| 6679587  | QWLQEIDR                   |                    | RAB1, member RAS oncogene family [Mus musculus]                                                     | 1087.5631 | 24.94  | 1.382551637 |
| 21592285 | QWYETNAPSTIR               |                    | keratin 20 [Mus musculus]                                                                           | 1465.7106 | 41.94  | 1.20951653  |
| 6753620  | QYPISLVLAPTR               |                    | DEAD/H (Asp-Glu-Ala-Asp/His) box polypeptide 3, X-linked [Mus musculus]                             | 1357.7897 | 24.79  | 0.881442891 |
| 29789080 | QYPLVTPNEER                |                    | coatamer protein complex, subunit beta 2 (beta prime) [Mus musculus]                                | 1345.6648 | 21.25  | 0.444565358 |
| 6678005  | QYQGPTGDSSATFEK            |                    | solute carrier family 1 (neutral amino acid transporter), member 5 [Mus musculus]                   | 1615.7311 | 42.52  | 0.299830357 |
| 6996913  | RAEDGSVIDYELIDQDAR         |                    | annexin A2 [Mus musculus]                                                                           | 2064.9824 | 67.49  | 0.857658077 |
| 42475990 | RAVSGNTPVQPQRR             | 3 Deamidation (NQ) | TPX2, microtubule-associated protein homolog [Mus musculus]                                         | 1568.8044 | 20.15  | 0           |
| 51889716 | REAIQANKPK                 | 2 Deamidation (NQ) | UTP14, U3 small nucleolar ribonucleoprotein, homolog A [Mus musculus]                               | 1156.6359 | 20.88  | 0           |
| 31981690 | RFDDAVVQSDMK               |                    | heat shock protein 8 [Mus musculus]                                                                 | 1410.6711 | 48.31  | 1.289244535 |
| 63664182 | RFDDAVVQSDMK               |                    | PREDICTED: similar to heat shock protein 8 [Mus musculus]                                           | 1410.6711 | 48.31  | 1.289244535 |
| 63674587 | RGFTVIVDMR                 |                    | PREDICTED: triple functional domain (PTPRF interacting) [Mus musculus]                              | 1193.6267 | 20.45  | 0           |
| 22203755 | RLDEEEEDNEGGEWER           |                    | eukaryotic translation initiation factor 3, subunit 8 [Mus musculus]                                | 1991.844  | 21.04  | 0.32247455  |
| 29336026 | RLDGESSELQEQMVEQK          |                    | nonmuscle myosin heavy chain [Mus musculus]                                                         | 2005.9541 | 36.71  | 0.970541401 |
| 13385582 | RLISGHR                    |                    | hypothetical protein LOC67304 [Mus musculus]                                                        | 838.4847  | 25.79  | 0           |
| 13384620 | RPAEDMEEEQAFK              |                    | heterogeneous nuclear ribonucleoprotein K [Mus musculus]                                            | 1579.7061 | 51.94  | 1.120947136 |
| 31542159 | SAEMVLSDDNFASIVAAVEEGR     |                    | ATPase, Ca++ transporting, ubiquitous [Mus musculus]                                                | 2381.1223 | 33.37  | 0           |
| 63489754 | SADESGALLAASHYASDEV        |                    | PREDICTED: similar to Spectrin alpha chain, brain (Spectrin, non-erythroid alpha chain) (Alpha-II s | 2177.0129 | 79.85  | 1.39160237  |
| 6754524  | SADTLWGIQK                 |                    | lactate dehydrogenase 1, A chain [Mus musculus]                                                     | 1118.5795 | 39.75  | 1.007839    |
| 34328108 | SAGVSVPGPMGSPGPR           |                    | procollagen, type I, alpha 1 [Mus musculus]                                                         | 1452.7344 | 27.61  | 0.632164661 |
| 63476037 | SALLDSIQNLQVALTSK          |                    | PREDICTED: procollagen, type VI, alpha 3 [Mus musculus]                                             | 1800.9897 | 44.14  | 0           |
| 30348966 | SALPAQSAATLPAR             |                    | spectrin beta 2 isoform 1 [Mus musculus]                                                            | 1353.749  | 33.88  | 1.156531187 |
| 6754206  | SANLVAATLGAILNR            |                    | hexokinase 1 [Mus musculus]                                                                         | 1483.8661 | 24.05  | 1.179223009 |
| 31982290 | SAQPSPHYMAGPSSGQIYGPGR     |                    | LIM domain containing preferred translocation partner in lipoma [Mus musculus]                      | 2342.103  | 30.47  | 1.616318628 |
| 29293809 | SAYDSTMETMNYAQIR           |                    | ATP citrate lyase [Mus musculus]                                                                    | 1880.8241 | 58.56  | 1.559862039 |
| 136429   | SCAAAGTECLISGWGNTK         |                    | Trypsin precursor                                                                                   | 1768.7963 | 26.99  | 0.106745022 |
| 54020676 | SDAAPTVPQASAPR             |                    | hypothetical protein LOC229317 [Mus musculus]                                                       | 1393.7087 | 65.11  | 1.140414536 |
| 33667042 | SDALETLGFLNHYQMK           |                    | heterogeneous nuclear ribonucleoprotein L [Mus musculus]                                            | 1866.9169 | 47.6   | 0           |
| 13928670 | SDDPDQQYLILNLTAR           |                    | vacuolar protein sorting 35 [Mus musculus]                                                          | 1748.8469 | 24.61  | 1.637659151 |
| 31543051 | SDFDMVDYLNELR              |                    | karyopherin (importin) beta 1 [Mus musculus]                                                        | 1616.7418 | 38.53  | 1.22603879  |
| 18079339 | SDFDPGQDQTYQHPPK           |                    | aconitase 2, mitochondrial [Mus musculus]                                                           | 1731.7627 | 60.94  | 1.113997114 |
| 31981722 | SDIDEIVLVGGSTR             |                    | heat shock 70kD protein 5 (glucose-regulated protein) [Mus musculus]                                | 1460.7616 | 61.2   | 0           |
| 6754256  | SDIGEVILVGGMTR             |                    | heat shock protein 9A [Mus musculus]                                                                | 1446.7689 | 35.43  | 1.248043461 |
| 58037546 | SDYLNTEFFEMDK              |                    | isocitrate dehydrogenase 1 (NADP+), soluble [Mus musculus]                                          | 1509.6655 | 55.75  | 1.61301877  |
| 9845257  | SEAAPAAPAAAPPAEK           |                    | histone 1, H1c [Mus musculus]                                                                       | 1448.7385 | 37.14  | 1.006992944 |
| 63738313 | SEDGVEGDLGETQSR            |                    | PREDICTED: similar to AHNAK [Mus musculus]                                                          | 1578.6918 | 59.16  | 1.923077797 |
| 31543605 | SEDLVDYGPFK                |                    | ribophorin I [Mus musculus]                                                                         | 1269.6206 | 24.83  | 0.714771324 |
| 6753498  | SEDYAFPTYADR               |                    | cytochrome c oxidase subunit IV isoform 1 [Mus musculus]                                            | 1434.6255 | 60.69  | 1.176839126 |
| 31982856 | SEEQLKEEGIEFK              |                    | dihydropyrimidinase [Mus musculus]                                                                  | 1565.7402 | 26.24  | 0.868865535 |
| 31982290 | SEGDTAYGQQVQPNTWK          |                    | LIM domain containing preferred translocation partner in lipoma [Mus musculus]                      | 1908.882  | 45.35  | 1.375645349 |
| 9910308  | SEGQLNGETNPPIEGNQAGDTAASAR |                    | Son cell proliferation protein truncated isoform [Mus musculus]                                     | 2584.1619 | 75.58  | 0.940814901 |
| 6753060  | SEIDLFNIR                  |                    | annexin A5 [Mus musculus]                                                                           | 1106.5916 | 38.15  | 1.025794349 |
| 13385340 | SELVAMLEEEELR              |                    | ADP-ribosylation factor-like 1 [Mus musculus]                                                       | 1547.7704 | 20.45  | 1.095129054 |
| 6755817  | SELVANNVTLPAGEQR           |                    | thymopoietin [Mus musculus]                                                                         | 1697.8857 | 90.59  | 1.201911776 |
| 6755963  | SENGLEFTSSGSANTETTK        |                    | voltage-dependent anion channel 1 [Mus musculus]                                                    | 1959.8765 | 124.37 | 1.365056984 |
| 6679687  | SEPIPESNEGPVK              |                    | glucose regulated protein [Mus musculus]                                                            | 1382.6761 | 61.49  | 0.538139733 |
| 6755566  | SEQAEPPAAADTHEAGDQNEAEK    |                    | solute carrier family 9 (sodium/hydrogen exchanger), isoform 3 regulator 1 [Mus musculus]           | 2395.0332 | 71.25  | 1.285460517 |
| 22203755 | SEQDQAENEGEDSAVLMER        |                    | eukaryotic translation initiation factor 3, subunit 8 [Mus musculus]                                | 2136.895  | 130.79 | 1.086925145 |
| 13430890 | SETAPAAPAAPAPAEK           |                    | histone 1, H1e [Mus musculus]                                                                       | 1478.7479 | 63.95  | 2.23846585  |
| 34328365 | SETAPAAPAAPAPVEK           |                    | histone 1, H1d [Mus musculus]                                                                       | 1506.7789 | 59.85  | 1.790494513 |
| 21426893 | SETAPAETAAPAPVEK           |                    | histone 1, H1b [Mus musculus]                                                                       | 1568.7749 | 55.57  | 0           |
| 6671690  | SETITEEELVGLMKN            |                    | carbonyl reductase 1 [Mus musculus]                                                                 | 1692.8267 | 35.19  | 0           |
| 51830180 | SETITEEELVGLMKN            |                    | PREDICTED: similar to Carbonyl reductase 1 [Mus musculus]                                           | 1692.8267 | 35.19  | 0           |

|          |                          |               |                                                                                                     |           |        |             |
|----------|--------------------------|---------------|-----------------------------------------------------------------------------------------------------|-----------|--------|-------------|
| 7304889  | SETSGSFEDALLAIVK         |               | annexin A4 [Mus musculus]                                                                           | 1666.8459 | 27.64  | 1.137805456 |
| 28487651 | SEVDEVEAALSSEVLTLEGGK    |               | PREDICTED: RIKEN cDNA 5830467P10 gene [Mus musculus]                                                | 2162.0728 | 40.86  | 1.283119713 |
| 45598381 | SFEDTIAQGITFVK           |               | thioredoxin domain containing 5 [Mus musculus]                                                      | 1555.7804 | 25.02  | 0.980125723 |
| 21314832 | SFENSLGINVPR             |               | UDP-glucose pyrophosphorylase 2 [Mus musculus]                                                      | 1332.6942 | 53.25  | 0           |
| 18079351 | SFFLQPGER                |               | major vault protein [Mus musculus]                                                                  | 1080.5546 | 20.8   | 1.72018456  |
| 63624633 | SFITTDVNPYYDSFVR         |               | PREDICTED: similar to neuexin III [Mus musculus]                                                    | 1923.9159 | 46.83  | 0.99279489  |
| 6679567  | SFTPDHVVYAR              |               | polymerase I and transcript release factor [Mus musculus]                                           | 1291.6394 | 27.44  | 1.297760762 |
| 31981690 | SFYPEEVSSMVLTK           |               | heat shock protein 8 [Mus musculus]                                                                 | 1616.7899 | 63.2   | 1.265867781 |
| 31980726 | SGEHDFGAAFDGDGDR         |               | phosphoglucomutase 2 [Mus musculus]                                                                 | 1652.6666 | 44.96  | 1.121810256 |
| 51770896 | SGETEDTFIADLVVGLCTGQIK   |               | PREDICTED: similar to Alpha enolase (2-phospho-D-glycerate hydro-lyase) (Non-neural enolase) (NNE)  | 2296.137  | 68.29  | 1.385022509 |
| 29293809 | SGGMSNELNIIISR           |               | ATP citrate lyase [Mus musculus]                                                                    | 1491.7328 | 31.17  | 1.549634845 |
| 6680970  | SGLGSQVGLMPGSGVPVGPGR    | Oxidation (M) | procollagen, type V, alpha 2 [Mus musculus]                                                         | 1867.9741 | 46.89  | 0.330775105 |
| 40254244 | SGSMDSPMSTENNSQLR        |               | loss of heterozygosity, 11, chromosomal region 2, gene A homolog [Mus musculus]                     | 1840.7793 | 64.46  | 1.408230028 |
| 38090154 | SGVLDEPTIATILR           |               | PREDICTED: oxidative-stress responsive 1 [Mus musculus]                                             | 1484.8292 | 24.69  | 1.407645701 |
| 6755863  | SILFVPTSAPR              |               | tumor rejection antigen gp96 [Mus musculus]                                                         | 1187.6832 | 48.8   | 0.914346657 |
| 31981690 | SINPDEAVAYGAAVQAAAILSGDK |               | heat shock protein 8 [Mus musculus]                                                                 | 2260.1462 | 131.13 | 0.928760528 |
| 13384736 | SIPLDEGEDEAQR            |               | dynein, cytoplasmic, heavy chain 1 [Mus musculus]                                                   | 1458.6697 | 52.48  | 1.187913222 |
| 31982030 | SIQEIQLDKDDESLR          |               | Rho GDP dissociation inhibitor (GDI) alpha [Mus musculus]                                           | 1917.9398 | 74.36  | 0.935429492 |
| 34740335 | SIQFVDWCPTGFK            |               | tubulin, alpha 2 [Mus musculus]                                                                     | 1527.7302 | 28.33  | 1.85949222  |
| 6678467  | SIQFVDWCPTGFK            |               | tubulin, alpha 4 [Mus musculus]                                                                     | 1527.7302 | 28.33  | 1.85949222  |
| 6753074  | SISFIPPDGEFELMR          |               | adaptor protein complex AP-2, mu1 [Mus musculus]                                                    | 1737.8457 | 43.08  | 1.10915104  |
| 38090003 | SISTSLPVLDLIDAIAPNAVR    |               | PREDICTED: expressed sequence A1427122 [Mus musculus]                                               | 2165.2246 | 84.99  | 1.434949061 |
| 31981657 | SIVNNGHSFNVEFDDSQDNAVLK  |               | carbonic anhydrase 2 [Mus musculus]                                                                 | 2549.2043 | 87.5   | 2.114205115 |
| 63556656 | SLLAAYTAACQAAGAAVKPPWR   |               | PREDICTED: RIKEN cDNA A430096B05 gene [Mus musculus]                                                | 2006.0283 | 37.23  | 0.723866092 |
| 54287684 | SLAGSSGPGASSGGDHSSELIVR  |               | eukaryotic translation elongation factor 1 delta isoform b [Mus musculus]                           | 2195.0774 | 27.14  | 1.63041171  |
| 29789317 | SLDLSIIAEVK              |               | keratinocyte associated protein 1 [Mus musculus]                                                    | 1302.7111 | 71.32  | 0           |
| 1346343  | SLDLSIIAEVK              |               | Keratin, type II cytoskeletal 1 (Cytokeratin 1) (K1) (CK 1) (67 kDa cytoke                          | 1302.7111 | 71.32  | 0           |
| 13624315 | SLDMDGIIAEVR             |               | keratin complex 2, basic, gene 8 [Mus musculus]                                                     | 1318.6747 | 86.09  | 1.396761319 |
| 63565108 | SLDMDGIIAEVR             |               | PREDICTED: similar to cytoke                                                                        | 1318.6747 | 86.09  | 1.396761319 |
| 7305295  | SLEADLMQLQEDLAAAER       |               | myosin, heavy polypeptide 11, smooth muscle [Mus musculus]                                          | 2002.98   | 99.74  | 2.043365211 |
| 51717092 | SLEEIYLFSLPIK            |               | PREDICTED: similar to 40S ribosomal protein S2 [Mus musculus]                                       | 1551.8629 | 37.8   | 1.080710788 |
| 18087805 | SLEEIYLFSLPIK            |               | ribosomal protein S2 [Mus musculus]                                                                 | 1551.8629 | 37.8   | 1.080710788 |
| 6754556  | SLETENSALQLQVTER         |               | lamin B1 [Mus musculus]                                                                             | 1817.9224 | 96.67  | 0.788511408 |
| 46275826 | SLFPVVLEQLDDYNAK         |               | laminin, alpha 4 [Mus musculus]                                                                     | 1850.9358 | 23.96  | 0           |
| 63622083 | SLGYAYVNFQQPADAER        |               | PREDICTED: similar to Poly(A) binding protein, cytoplasmic 4, isoform 1 [Mus musculus]              | 1928.9139 | 57.52  | 0.996583935 |
| 6680606  | SLLEGQEAHYNNLPTPK        |               | keratin complex 1, acidic, gene 19 [Mus musculus]                                                   | 1910.955  | 88.56  | 1.276283149 |
| 1346343  | SLNNQFASFIDK             |               | Keratin, type II cytoskeletal 1 (Cytokeratin 1) (K1) (CK 1) (67 kDa cytoke                          | 1383.6917 | 94.51  | 0           |
| 6754524  | SLNPELGTADAKEQWK         |               | lactate dehydrogenase 1, A chain [Mus musculus]                                                     | 1830.8911 | 81.21  | 1.389926184 |
| 33859811 | SLNSEMDNILANLR           |               | hydroxyacyl-Coenzyme A dehydrogenase/3-ketoacyl-Coenzyme A thiolase/enoyl-Coenzyme A hydratase (tri | 1589.7975 | 68.23  | 0.96342097  |
| 6680572  | SLSALGNVISALAEAGTYVPYR   |               | kinesin family member 5B [Mus musculus]                                                             | 2268.1841 | 33.01  | 1.392910656 |
| 9789931  | SLSLLAKAM DPR            |               | diaphanous homolog 3 [Mus musculus]                                                                 | 1301.7473 | 31.66  | 0           |
| 21592285 | SLSSSSQGPALSMGSLYR       |               | keratin 20 [Mus musculus]                                                                           | 1914.9175 | 21.77  | 1.391418294 |
| 40556608 | SLTNDWEDHLAVK            |               | heat shock protein 1, beta [Mus musculus]                                                           | 1527.7424 | 42.59  | 0.643214641 |
| 6754254  | SLTNDWEEHLAVK            |               | heat shock protein 1, alpha [Mus musculus]                                                          | 1541.7771 | 27.36  | 1.375102713 |
| 31982755 | SLYSSSPGGAYVTR           |               | vimentin [Mus musculus]                                                                             | 1444.7129 | 62.48  | 1.275672302 |
| 22267442 | SMAASGNLGHPTPFDEL        |               | ubiquinol cytochrome c reductase core protein 2 [Mus musculus]                                      | 1759.8376 | 31.6   | 0           |
| 20137006 | SMEAEMIQLQEELAAAER       |               | myosin, heavy polypeptide 9, non-muscle [Mus musculus]                                              | 2048.9634 | 62.24  | 1.074516744 |
| 63487095 | SMGYDDL DYGMMSDYGTAR     |               | PREDICTED: catenin src [Mus musculus]                                                               | 2147.8484 | 67.42  | 1.34116238  |
| 22122825 | SMLEVNYPMENGVIR          |               | actin-related protein 2 [Mus musculus]                                                              | 1751.8672 | 37.64  | 0           |
| 50355692 | SNEDQSMGNWQIR            |               | lamin A isoform A [Mus musculus]                                                                    | 1564.6863 | 87.15  | 0.887464101 |
| 31982275 | SNLAYDIVQLPTGLTGIK       |               | heat shock protein 4 [Mus musculus]                                                                 | 1903.0417 | 73.22  | 1.099610583 |
| 6681291  | SNLVDNTNQVEVLQR          |               | Ddx19-like protein [Mus musculus]                                                                   | 1728.8636 | 44.66  | 1.935114835 |
| 13624315 | SNMDNMFESYINNL R         |               | keratin complex 2, basic, gene 8 [Mus musculus]                                                     | 1847.8066 | 66.61  | 1.258641917 |
| 2506774  | SNMDNMFESYINNL R         |               | Keratin, type II cytoskeletal 8 (Cytokeratin 8) (K8) (CK 8)                                         | 1847.8066 | 66.61  | 1.258641917 |
| 63565108 | SNMDNMFESYINNL R         |               | PREDICTED: similar to cytoke                                                                        | 1847.8066 | 66.61  | 1.258641917 |
| 21450277 | SPDFTNENPLETR            |               | Na <sup>+</sup> /K <sup>+</sup> -ATPase alpha 1 subunit [Mus musculus]                              | 1519.7078 | 67.3   | 1.122242063 |
| 9790167  | SPESQLFSIEDIQEVR         |               | phospholipase C, delta 1 [Mus musculus]                                                             | 1876.9408 | 35.22  | 1.749662253 |
| 6679761  | SPFETDMLTLTR             |               | fructose bisphosphatase 2 [Mus musculus]                                                            | 1410.702  | 58.62  | 1.112441191 |
| 31980969 | SPFLQVFNNSPDESSYYR       |               | SEC23B [Mus musculus]                                                                               | 2149.9978 | 34.98  | 0.698344049 |
| 63746482 | SPFSVGVSPSLDLSK          |               | PREDICTED: filamin, alpha [Mus musculus]                                                            | 1519.7964 | 82.82  | 0           |

|          |                         |                  |                                                                                                         |           |        |             |
|----------|-------------------------|------------------|---------------------------------------------------------------------------------------------------------|-----------|--------|-------------|
| 22164770 | SPYEQFLK                |                  | oncoprotein induced transcript 1 [Mus musculus]                                                         | 1011.5145 | 28.92  | 1.159709888 |
| 33859560 | SPYLYPLYGLGELPQGFAR     |                  | guanosine diphosphate (GDP) dissociation inhibitor 1 [Mus musculus]                                     | 2141.1118 | 35.86  | 0.990327024 |
| 56119103 | SPYLYPLYGLGELPQGFAR     |                  | guanosine diphosphate (GDP) dissociation inhibitor 3 [Mus musculus]                                     | 2141.1118 | 35.86  | 0.990327024 |
| 18087805 | SPYQEFTDHLVK            |                  | ribosomal protein S2 [Mus musculus]                                                                     | 1463.7222 | 31.77  | 1.409097137 |
| 12746446 | SQDVGFWEVEVVR           |                  | epithelial protein lost in neoplasm [Mus musculus]                                                      | 1507.7271 | 39.39  | 0           |
| 6755354  | SQFSLTNGMYPHK           |                  | ribosomal protein L6 [Mus musculus]                                                                     | 1509.7153 | 29.7   | 1.504305661 |
| 18079339 | SQFTITPGSEQIR           |                  | aconitase 2, mitochondrial [Mus musculus]                                                               | 1463.7512 | 68.87  | 1.377476738 |
| 22094115 | SQGDMQDLNNGNSVTR        |                  | signal transducer and activator of transcription 3 isoform 3 [Mus musculus]                             | 1863.8507 | 56.09  | 0.743870275 |
| 31981722 | SQIFSTASDNQPTVIK        |                  | heat shock 70kD protein 5 (glucose-regulated protein) [Mus musculus]                                    | 1836.934  | 105.45 | 0.780269293 |
| 31981690 | SQIHDIVLVGGSTR          |                  | heat shock protein 8 [Mus musculus]                                                                     | 1481.8148 | 75.37  | 0.806030116 |
| 6677871  | SQLIVVEEGSEPELMK        |                  | scinderin [Mus musculus]                                                                                | 1874.9429 | 55.26  | 1.139918373 |
| 21703972 | SQLYDDLMEFMK            |                  | malic enzyme 2, NAD(+)-dependent, mitochondrial [Mus musculus]                                          | 1634.7161 | 32.28  | 1.712698949 |
| 9256555  | SQMDGLIPGVEPR           |                  | nucleolar protein 5 [Mus musculus]                                                                      | 1398.705  | 37.88  | 1.69989098  |
| 63487095 | SQSSHSYDDSTLPLDR        |                  | PREDICTED: catenin src [Mus musculus]                                                                   | 1920.8972 | 50.75  | 1.034610994 |
| 6754558  | SQTNWGPGEFR             |                  | lamin B2 [Mus musculus]                                                                                 | 1365.6285 | 30.1   | 1.341791952 |
| 547749   | SQYEQLAEQNR             |                  | Keratin, type I cytoskeletal 10 (Cytokeratin 10) (K10) (CK 10)                                          | 1365.6395 | 70.69  | 0           |
| 547749   | SQYEQLAEQNR             | Deamidation (NQ) | Keratin, type I cytoskeletal 10 (Cytokeratin 10) (K10) (CK 10)                                          | 1366.6293 | 24.24  | 0           |
| 63738313 | SSEVLSGDDDEDYQR         |                  | PREDICTED: similar to AHNAK [Mus musculus]                                                              | 1698.7526 | 31.39  | 2.217015226 |
| 6755040  | SSFFVNLTLGGQK           |                  | profilin 1 [Mus musculus]                                                                               | 1454.7605 | 82.11  | 0.994052268 |
| 31559916 | SSGSPYGGGYGSGGGSGYGSR   |                  | heterogeneous nuclear ribonucleoprotein A3 isoform b [Mus musculus]                                     | 1910.7955 | 163.5  | 1.371615841 |
| 136429   | SSGSSYPSLLQCLK          |                  | Trypsin precursor                                                                                       | 1469.7402 | 33.26  | 0           |
| 12083691 | SSGTGASVGPQPQSDQDTLQVR  |                  | PDZ and LIM domain 5 isoform ENH1 [Mus musculus]                                                        | 2184.0625 | 55.93  | 1.18145108  |
| 9790067  | SSHYDELLAAEAR           |                  | staphylococcal nuclease domain containing 1 [Mus musculus]                                              | 1461.6903 | 27.88  | 0.334928296 |
| 46195798 | SSLNPILFR               |                  | dolichyl-di-phosphooligosaccharide-protein glycotransferase [Mus musculus]                              | 1046.6093 | 20.29  | 1.506397559 |
| 63489759 | SLSAQAQDFNQLAELDR       |                  | PREDICTED: spectrin alpha 2 [Mus musculus]                                                              | 1951.9434 | 53.51  | 3.588668019 |
| 8567338  | SSPEPVALTESEYVIR        |                  | coatamer protein complex, subunit gamma [Mus musculus]                                                  | 2006.9999 | 60.95  | 0           |
| 6755817  | SSTPLPTVSSAENR          |                  | thymopoietin [Mus musculus]                                                                             | 1633.8053 | 29.88  | 0.695647729 |
| 31981690 | STAGDTHLGGEDFDNR        |                  | heat shock protein 8 [Mus musculus]                                                                     | 1691.728  | 117.44 | 1.04777573  |
| 33859482 | STAISLFYELSENDLNFIK     |                  | eukaryotic translation elongation factor 2 [Mus musculus]                                               | 2204.116  | 61.75  | 0.86945353  |
| 33186863 | STESLQANVQR             |                  | ribosomal protein L13 [Mus musculus]                                                                    | 1232.621  | 51.08  | 0.99367214  |
| 34328415 | STGSVVGGQPFGGAR         |                  | aldehyde dehydrogenase 4 family, member A1 [Mus musculus]                                               | 1447.7318 | 25.7   | 0           |
| 31981549 | STLSVIPSGVQWIQDR        |                  | sulfide quinone reductase-like [Mus musculus]                                                           | 1785.9558 | 46.5   | 1.554560194 |
| 6754256  | STNGDTFLGGEDFDQALLR     |                  | heat shock protein 9A [Mus musculus]                                                                    | 2055.9656 | 88.17  | 0.956910855 |
| 6754256  | STNGDTFLGGEDFDQALLR     | Deamidation (NQ) | heat shock protein 9A [Mus musculus]                                                                    | 2056.9624 | 89.06  | 1.525384205 |
| 30425112 | STPEDQILYQTER           |                  | hypothetical protein LOC109154 [Mus musculus]                                                           | 1579.7635 | 33.04  | 0.946673485 |
| 8567336  | STWEVIQSEDFK            |                  | chloride channel calcium activated 3 [Mus musculus]                                                     | 1597.7355 | 75.27  | 0.30953837  |
| 51491845 | SVDPTLALSVYLR           |                  | clathrin, heavy polypeptide (Hc) [Mus musculus]                                                         | 1433.8025 | 46     | 1.131411843 |
| 50355692 | SVGGSGGSGFGDNLVTR       |                  | lamin A isoform A [Mus musculus]                                                                        | 1566.7533 | 100.35 | 1.234913594 |
| 27370510 | SVNDIVVLGPEQFYATR       |                  | paraoxonase 3 [Mus musculus]                                                                            | 1907.9807 | 23.4   | 2.388115428 |
| 51491845 | SVNESLNNLFITEEDYQALR    |                  | clathrin, heavy polypeptide (Hc) [Mus musculus]                                                         | 2355.1482 | 75.59  | 1.062932062 |
| 6678359  | SVPMSTVFPYSDGVATEK      |                  | transketolase [Mus musculus]                                                                            | 1914.9152 | 66.85  | 1.003194836 |
| 6753658  | SVSTPSEAGSQSDGAVGSR     |                  | dynein, cytoplasmic, intermediate chain 2 [Mus musculus]                                                | 1950.8617 | 105.52 | 0.892042813 |
| 13385310 | SVTNEADVTQQLGGAK        |                  | propionyl Coenzyme A carboxylase, beta polypeptide [Mus musculus]                                       | 1675.8076 | 46.53  | 1.714125951 |
| 51828444 | SVVTEEFNGSDWER          |                  | PREDICTED: proline-rich polypeptide 6 [Mus musculus]                                                    | 1654.7526 | 31.09  | 0.809441436 |
| 31982233 | SWQDELAQQAEEGSAR        |                  | LYRIC [Mus musculus]                                                                                    | 1804.824  | 47     | 1.72711888  |
| 6753138  | SYEAYVLNIIR             |                  | Na+/K+ -ATPase beta 1 subunit [Mus musculus]                                                            | 1340.7256 | 56.16  | 1.358791139 |
| 6671507  | SYELPDGQVITIGNER        |                  | actin, alpha 2, smooth muscle, aorta [Mus musculus]                                                     | 1790.8894 | 64.47  | 2.592370216 |
| 6671509  | SYELPDGQVITIGNER        |                  | actin, beta, cytoplasmic [Mus musculus]                                                                 | 1790.8894 | 64.47  | 2.592370216 |
| 30425250 | SYELPDGQVITIGNER        |                  | hypothetical protein LOC238880 [Mus musculus]                                                           | 1790.8894 | 64.47  | 2.592370216 |
| 6671507  | SYELPDGQVITIGNER        | Deamidation (NQ) | actin, alpha 2, smooth muscle, aorta [Mus musculus]                                                     | 1791.8969 | 38.56  | 1.360030419 |
| 6671509  | SYELPDGQVITIGNER        | Deamidation (NQ) | actin, beta, cytoplasmic [Mus musculus]                                                                 | 1791.8969 | 38.56  | 1.360030419 |
| 30425250 | SYELPDGQVITIGNER        | Deamidation (NQ) | hypothetical protein LOC238880 [Mus musculus]                                                           | 1791.8969 | 38.56  | 1.360030419 |
| 38198665 | SYQDPSNAQFLESIR         |                  | p47 protein [Mus musculus]                                                                              | 1754.8439 | 25.55  | 0.956720858 |
| 31981549 | TAAAVAAQSGILDR          |                  | sulfide quinone reductase-like [Mus musculus]                                                           | 1343.7321 | 54.85  | 0.936392391 |
| 6753620  | TAAFLPILSQIADGPGALR     |                  | DEAD/H (Asp-Glu-Ala-Asp/His) box polypeptide 3, X-linked [Mus musculus]                                 | 2316.25   | 22.47  | 1.049696378 |
| 31543974 | TAFDEAIAELDTLNEESYK     |                  | tyrosine 3-monooxygenase/tryptophan 5-monooxygenase activation protein, beta polypeptide [Mus musculus] | 2159.0037 | 65.31  | 1.234985613 |
| 6756041  | TAFDEAIAELDTLSEESYK     |                  | tyrosine 3-monooxygenase/tryptophan 5-monooxygenase activation protein, zeta polypeptide [Mus musculus] | 2131.9922 | 49.8   | 1.214054595 |
| 63489754 | TATDEAYKDPNSNLQCK       |                  | PREDICTED: similar to Spectrin alpha chain, brain (Spectrin, non-erythroid alpha chain) (Alpha-II s     | 1737.8331 | 56.61  | 1.227578541 |
| 6671664  | TDAPQPDVKDEEGKEEEK      |                  | calnexin [Mus musculus]                                                                                 | 2043.9429 | 59.19  | 0.925626035 |
| 6755963  | TDEFQLHTNVNDGTEFGGSIYQK |                  | voltage-dependent anion channel 1 [Mus musculus]                                                        | 2600.1829 | 25.68  | 1.081045293 |

|          |                        |                                                                                                  |           |        |             |
|----------|------------------------|--------------------------------------------------------------------------------------------------|-----------|--------|-------------|
| 6754034  | TDESQPWVLPVVR          | glutamate oxaloacetate transaminase 1, soluble [Mus musculus]                                    | 1525.7977 | 25.67  | 2.464163833 |
| 10946574 | TDLNPDLNQQGDDLDPNYLSSR | creatine kinase, brain [Mus musculus]                                                            | 2518.1726 | 57.12  | 1.276220659 |
| 63476037 | TDLQITINDPR            | PREDICTED: procollagen, type VI, alpha 3 [Mus musculus]                                          | 1273.6385 | 54.82  | 0.77462169  |
| 46593021 | LDLTDYLNLR             | ubiquinol-cytochrome c reductase core protein 1 [Mus musculus]                                   | 1110.547  | 29.61  | 1.726520352 |
| 63540743 | TDYVTDNGDGTYSR         | PREDICTED: filamin C, gamma [Mus musculus]                                                       | 1577.6899 | 26.19  | 0           |
| 13384620 | TDYNASVSPVDSGPER       | heterogeneous nuclear ribonucleoprotein K [Mus musculus]                                         | 1780.806  | 108.58 | 1.171759214 |
| 25141233 | TEEGPTLSYGR            | matrin 3 [Mus musculus]                                                                          | 1209.5808 | 29.22  | 1.035531948 |
| 6755534  | TEEPESPEVDQTSPTPGDGNPR | solute carrier family 12, member 7 [Mus musculus]                                                | 2426.0544 | 83.61  | 0.922287137 |
| 6753928  | TEGEEEEEEEEESPDTGGEYK  | X-ray repair complementing defective repair in Chinese hamster cells 6 [Mus musculus]            | 2272.8826 | 35.06  | 0.727934364 |
| 20137006 | TELEDTLSTAAQQELR       | myosin, heavy polypeptide 9, non-muscle [Mus musculus]                                           | 1919.9159 | 115.1  | 1.055756876 |
| 7305295  | TELEDTLSTATQQELR       | myosin, heavy polypeptide 11, smooth muscle [Mus musculus]                                       | 1949.9341 | 129.69 | 2.084057426 |
| 29244560 | TELQGLWINDIVPIGR       | hypothetical protein LOC331063 [Mus musculus]                                                    | 1824.0034 | 81.26  | 0.320042267 |
| 31559959 | TELSQSDMFDQQR          | eukaryotic translation termination factor 1 [Mus musculus]                                       | 1456.6591 | 34.14  | 1.352096667 |
| 13624315 | TEMENEFVLIK            | keratin complex 2, basic, gene 8 [Mus musculus]                                                  | 1352.6774 | 62.62  | 1.263166478 |
| 2506774  | TEMENEFVLIK            | Keratin, type II cytoskeletal 8 (Cytokeratin 8) (K8) (CK 8)                                      | 1352.6774 | 62.62  | 1.263166478 |
| 63565108 | TEMENEFVLIK            | PREDICTED: similar to cytokeratin EndoA - mouse [Mus musculus]                                   | 1352.6774 | 62.62  | 1.263166478 |
| 6755863  | TETVEEPLLEEDEAAKEEK    | tumor rejection antigen gp96 [Mus musculus]                                                      | 2075.9438 | 78.56  | 0.618073352 |
| 31981722 | TFAPEEISAMVLTK         | heat shock 70kD protein 5 (glucose-regulated protein) [Mus musculus]                             | 1536.7955 | 63.34  | 0.912673052 |
| 33563250 | TFGGAPGFSGLSPLSPVFPFR  | desmin [Mus musculus]                                                                            | 2078.0769 | 95.16  | 2.027353397 |
| 13384828 | TFHFDSVDEIHSR          | serine (or cysteine) proteinase inhibitor, clade B, member 1a [Mus musculus]                     | 1589.7471 | 27.45  | 0           |
| 6679078  | TFIAIKPDGVQR           | nucleoside-diphosphate kinase 2 [Mus musculus]                                                   | 1344.7662 | 54.85  | 1.222577311 |
| 21312260 | TFPTVNPPTTGEVIGHVAEGDR | aldehyde dehydrogenase 1 family, member B1 [Mus musculus]                                        | 2197.0798 | 63.86  | 1.018678633 |
| 6680067  | TFTTQETITNAETAK        | glucose phosphate isomerase 1 [Mus musculus]                                                     | 1655.8086 | 71.5   | 1.685224906 |
| 21312260 | TFVEESIYR              | aldehyde dehydrogenase 1 family, member B1 [Mus musculus]                                        | 1143.5719 | 51.9   | 1.11471845  |
| 6753036  | TFVQENVYDEFVER         | aldehyde dehydrogenase 2, mitochondrial [Mus musculus]                                           | 1774.8373 | 66.6   | 1.888764581 |
| 6755040  | TFVSITPAEVLVGVK        | profilin 1 [Mus musculus]                                                                        | 1616.9211 | 80.61  | 1.013652608 |
| 6680748  | TGAIVDVPVGEELLGR       | ATP synthase, H+ transporting, mitochondrial F1 complex, alpha subunit, isoform 1 [Mus musculus] | 1624.8956 | 108.65 | 1.105003094 |
| 58037267 | TGEAIVDAALSALR         | protein disulfide isomerase-associated 6 [Mus musculus]                                          | 1386.7616 | 87.59  | 0.94312395  |
| 6755004  | TGGLEIDSDFGGFR         | programmed cell death 8 [Mus musculus]                                                           | 1470.696  | 42.02  | 1.098360256 |
| 6753304  | TGLYNYDDEKEK           | serine (or cysteine) proteinase inhibitor, clade H, member 1 [Mus musculus]                      | 1637.7407 | 30.45  | 0.666399734 |
| 6681095  | TGQAAGFSYTDANK         | cytochrome c, somatic [Mus musculus]                                                             | 1430.6521 | 70.56  | 1.620988088 |
| 31981273 | TGQEIPVNLIR            | CNDP dipeptidase 2 (metallopeptidase M20 family) [Mus musculus]                                  | 1126.618  | 25.66  | 1.815674731 |
| 34996495 | TGQEVVFAEPDNK          | ribophorin II [Mus musculus]                                                                     | 1532.7577 | 55.65  | 0.904823828 |
| 63481281 | TGQEYKPGNPSAAAVQTVSTK  | PREDICTED: glutamyl-prolyl-tRNA synthetase [Mus musculus]                                        | 2134.072  | 49.24  | 1.161618446 |
| 31560517 | TGVAPIIDVVR            | ribosomal protein L27a [Mus musculus]                                                            | 1139.686  | 51.98  | 0.840982322 |
| 13242328 | TGYTLDVTTGQR           | NS1-associated protein 1 [Mus musculus]                                                          | 1311.653  | 32.62  | 1.321598304 |
| 29293809 | TIAIIAEGIPALTR         | ATP citrate lyase [Mus musculus]                                                                 | 1567.9116 | 58.36  | 1.586980712 |
| 31980648 | TIAMDGTEGLVR           | ATP synthase, H+ transporting mitochondrial F1 complex, beta subunit [Mus musculus]              | 1262.645  | 48.16  | 1.498298454 |
| 6754976  | TIAQDYGVLLK            | peroxiredoxin 1 [Mus musculus]                                                                   | 1107.6045 | 60.37  | 1.334027628 |
| 6754854  | TIFWTDSQLDR            | nidogen 1 [Mus musculus]                                                                         | 1381.6729 | 28     | 1.597973693 |
| 6755901  | TIGGGDDSFNTFFSETGAGK   | tubulin, alpha 1 [Mus musculus]                                                                  | 2007.9146 | 54.75  | 0.497936003 |
| 34740335 | TIGGGDDSFNTFFSETGAGK   | tubulin, alpha 2 [Mus musculus]                                                                  | 2007.9146 | 54.75  | 0.497936003 |
| 6678469  | TIGGGDDSFNTFFSETGAGK   | tubulin, alpha 6 [Mus musculus]                                                                  | 2007.9146 | 54.75  | 0.497936003 |
| 31981909 | TIGVSNFNPLQIER         | aldo-keto reductase family 1, member B3 (aldose reductase) [Mus musculus]                        | 1587.8474 | 23.88  | 0.888193033 |
| 31543605 | TILPAAQDDVYYR          | ribophorin I [Mus musculus]                                                                      | 1480.7804 | 57.56  | 0.852099492 |
| 14149647 | TILSNQTVDIPENVEITLK    | ribosomal protein L9 [Mus musculus]                                                              | 2127.1589 | 30.35  | 1.057538145 |
| 11230802 | TINEVENQILTR           | actinin alpha 4 [Mus musculus]                                                                   | 1429.7709 | 66.83  | 0.929743015 |
| 33468903 | TIPAWATLSASQLAR        | heterochromatin protein 1, binding protein 3 [Mus musculus]                                      | 1585.8779 | 28.09  | 1.449134364 |
| 59709449 | TIPWLENR               | actinin alpha 2 [Mus musculus]                                                                   | 1028.5626 | 33.36  | 1.233268656 |
| 63638100 | TIQFVDWCPTGFK          | PREDICTED: similar to tubulin, alpha 1 [Mus musculus]                                            | 1541.745  | 45.7   | 1.588631702 |
| 6755901  | TIQFVDWCPTGFK          | tubulin, alpha 1 [Mus musculus]                                                                  | 1541.745  | 45.7   | 1.588631702 |
| 6678469  | TIQFVDWCPTGFK          | tubulin, alpha 6 [Mus musculus]                                                                  | 1541.745  | 45.7   | 1.588631702 |
| 9845265  | TITLEVEPSDTIENVK       | ubiquitin A-52 residue ribosomal protein fusion product 1 [Mus musculus]                         | 1787.9231 | 87.79  | 1.24273352  |
| 6680067  | TLASLSPETSLFIIASK      | glucose phosphate isomerase 1 [Mus musculus]                                                     | 1777.9866 | 37.57  | 0           |
| 31981828 | TLDLPIYVTR             | coatamer protein complex subunit alpha [Mus musculus]                                            | 1190.6814 | 39.57  | 0.932384677 |
| 30911099 | TLEAVQDLLEQGR          | fatty acid synthase [Mus musculus]                                                               | 1471.7886 | 50.44  | 0.706611919 |
| 63641940 | TLELQGLINDLQR          | PREDICTED: desmoplakin [Mus musculus]                                                            | 1512.839  | 47.21  | 1.219885564 |
| 22779912 | TLESVDPLGLLNTDILTIR    | dynamitin 1-like [Mus musculus]                                                                  | 2211.2227 | 32.83  | 1.469206491 |
| 27754067 | TLEVEIEPGVR            | DnaJ (Hsp40) homolog, subfamily B, member 11 [Mus musculus]                                      | 1241.6652 | 38.09  | 0.740246106 |
| 33563236 | TLLGDVPPVADPTVPNVTVTR  | Rho, GDP dissociation inhibitor (GDI) beta [Mus musculus]                                        | 2163.2012 | 50.98  | 0.641929004 |



|          |                            |                                                                                                     |           |        |             |
|----------|----------------------------|-----------------------------------------------------------------------------------------------------|-----------|--------|-------------|
| 31981679 | TLNDELEIHEGMK              | heat shock protein 1 (chaperonin) [Mus musculus]                                                    | 1504.7493 | 28.05  | 0           |
| 41322904 | TLQEEHVTVAQLR              | plectin 1 isoform 1 [Mus musculus]                                                                  | 1523.8207 | 36.33  | 0           |
| 7305133  | TLQISPLDNGDLVR             | hemopoietic cell phosphatase [Mus musculus]                                                         | 1540.8331 | 31.24  | 0           |
| 6678726  | TLTGTAAALTQVSQEENLR        | leukotriene A4 hydrolase [Mus musculus]                                                             | 1932.0015 | 20.66  | 26.48167318 |
| 6679501  | TMLELLNQLDGFDSR            | protease (prosome, macropain) 26S subunit, ATPase 1 [Mus musculus]                                  | 1751.8704 | 22.43  | 5.214324897 |
| 6755809  | TMLASAGLIQTAR              | talin 1 [Mus musculus]                                                                              | 1447.7516 | 37.69  | 0           |
| 6678643  | TNAENEFVTIK                | keratin complex 2, basic, gene 1 [Mus musculus]                                                     | 1265.6338 | 48.71  | 0           |
| 1346343  | TNAENEFVTIK                | Keratin, type II cytoskeletal 1 (Cytokeratin 1) (K1) (CK 1) (67 kDa cytokeatin) (Hair alpha protei  | 1265.6338 | 48.71  | 0           |
| 31560653 | TNVLGHLQGGAPTFFDR          | phosphofructokinase, liver, B-type [Mus musculus]                                                   | 1907.9811 | 22.82  | 2.069659117 |
| 29126205 | TNVSGGAIAGHPLGGSGSR        | acetyl-Coenzyme A acyltransferase 2 (mitochondrial 3-oxoacyl-Coenzyme A thiolase) [Mus musculus]    | 1807.9432 | 58.37  | 1.220021441 |
| 22094123 | TPAQSGAWDPNNPNTPSR         | suppressor of Ty 5 homolog [Mus musculus]                                                           | 1909.8748 | 43.8   | 1.02362891  |
| 63607160 | TPLSEAEFEEIMNR             | PREDICTED: cleavage and polyadenylation specific factor 6 [Mus musculus]                            | 1665.7899 | 21.82  | 1.551594051 |
| 29336026 | TPNVGGPGGQVWEVTAR          | nonmuscle myosin heavy chain [Mus musculus]                                                         | 1722.8629 | 43.8   | 1.101522962 |
| 30023814 | TPSPPEPEPAGTAQK            | breast carcinoma amplified sequence 1 [Mus musculus]                                                | 1506.7504 | 45.35  | 0.872985168 |
| 6677935  | TPVDYIDLPSYSSPSR           | sorbin and SH3 domain containing 1 [Mus musculus]                                                   | 1796.8643 | 60.13  | 1.11495301  |
| 19527174 | TPVEEVPAAIAPFQGR           | splicing factor 3b, subunit 3 [Mus musculus]                                                        | 1681.8943 | 35.59  | 1.697370893 |
| 13385652 | TPVEEVAIHR                 | ribosomal protein S20 [Mus musculus]                                                                | 1247.6759 | 58.39  | 0.865536484 |
| 19882201 | TPVQSQQPSATTPSGADEK        | proteasome 26S non-ATPase subunit 2 [Mus musculus]                                                  | 1928.9191 | 82.97  | 1.41770542  |
| 18250284 | TPYTDVNIIVTIR              | isocitrate dehydrogenase 3 (NAD+) alpha [Mus musculus]                                              | 1391.7548 | 56.68  | 1.319055781 |
| 31980726 | TQAYPDQKPGTSGLR            | phosphoglucomutase 2 [Mus musculus]                                                                 | 1618.8123 | 22.92  | 1.939674816 |
| 31981824 | TQDDIETILQLFR              | ankyrin repeat domain 25 [Mus musculus]                                                             | 1591.8438 | 63.62  | 1.772607694 |
| 6678752  | TQDDVDIADVAYFEK            | lymphocyte antigen 74 [Mus musculus]                                                                | 1891.8734 | 85.71  | 1.050942641 |
| 55741460 | TQGPYDVVLPGGNLGAQNLSESPMVK | DJ-1 protein [Mus musculus]                                                                         | 2770.4023 | 21.31  | 0           |
| 33598964 | TQLEELEDELQATEDAK          | myosin heavy chain 10, non-muscle [Mus musculus]                                                    | 1961.9218 | 124.06 | 1.84238076  |
| 20137006 | TQLEELEDELQATEDAK          | myosin, heavy polypeptide 9, non-muscle [Mus musculus]                                              | 1961.9218 | 124.06 | 1.84238076  |
| 9256555  | TQLYEYLQNR                 | nucleolar protein 5 [Mus musculus]                                                                  | 1327.6688 | 32.46  | 1.313737921 |
| 6680572  | TQMLDQEELLASTR             | kinesin family member 5B [Mus musculus]                                                             | 1634.8176 | 23.2   | 0           |
| 31980636 | TQQTNDIELQQEQR             | mannosidase, beta A, lysosomal [Mus musculus]                                                       | 1730.8275 | 33.67  | 1.962381827 |
| 31980838 | TSAILGNAGQAGQDPGPGEK       | RAB25, member RAS oncogene family [Mus musculus]                                                    | 1911.9313 | 90.7   | 0           |
| 21704096 | TSDLIVLGLPWK               | TAR DNA binding protein isoform 1 [Mus musculus]                                                    | 1341.7716 | 33.08  | 1.28296609  |
| 33563270 | TSFDEMLPGTHFQR             | oxoglutarate dehydrogenase (lipoamide) [Mus musculus]                                               | 1665.7799 | 47.77  | 0.622685626 |
| 13430890 | TSGPPVSELITK               | histone 1, H1e [Mus musculus]                                                                       | 1228.6747 | 41.68  | 0.56131907  |
| 51491845 | TSIDAYDNFDNISLAQR          | clathrin, heavy polypeptide (Hc) [Mus musculus]                                                     | 1942.9193 | 77.94  | 1.237765657 |
| 6671684  | TSMGGTQQQFVEGVR            | catenin beta [Mus musculus]                                                                         | 1624.7795 | 36.09  | 0           |
| 6678359  | TSRPENAIYSNNEFDQVGGAK      | transketolase [Mus musculus]                                                                        | 2481.2046 | 46.11  | 0.914744641 |
| 21313262 | TSSAEMPTIPLGSAVEAIR        | inner membrane protein, mitochondrial [Mus musculus]                                                | 1930.0005 | 65.33  | 1.006875573 |
| 31982275 | TSTVDLPIESQLLWQLDR         | heat shock protein 4 [Mus musculus]                                                                 | 2114.1221 | 28.31  | 0           |
| 6753294  | TSVQTEDDQLIAGQSAR          | catenin alpha 1 [Mus musculus]                                                                      | 1818.8777 | 27.01  | 1.563090596 |
| 29293809 | TTDGVYEGVAIGGDR            | ATP citrate lyase [Mus musculus]                                                                    | 1509.7208 | 42.4   | 1.488467153 |
| 46519156 | TTGFGMIYDSLIDYAK           | ribosomal protein S24 isoform 1 [Mus musculus]                                                      | 1681.7903 | 23.45  | 1.159702554 |
| 31981515 | TTHFVEGGDAGNREDQINR        | ribosomal protein L7 [Mus musculus]                                                                 | 2115.9839 | 36.78  | 1.141486629 |
| 6754556  | TTIPEEEEEEEPIGVAVEEEEE     | lamin B1 [Mus musculus]                                                                             | 2672.1982 | 128.73 | 0.66799561  |
| 18034769 | TTLSTFQSPFEFSVTR           | sorting nexin 5 [Mus musculus]                                                                      | 1700.8525 | 21.99  | 1.011976486 |
| 50080209 | TTPSYVAFTDTER              | heat shock protein 1A [Mus musculus]                                                                | 1487.7085 | 85.15  | 1.059193853 |
| 7305163  | TTPSYVAFTDTER              | heat shock protein 1-like [Mus musculus]                                                            | 1487.7085 | 85.15  | 1.059193853 |
| 31981690 | TTPSYVAFTDTER              | heat shock protein 8 [Mus musculus]                                                                 | 1487.7085 | 85.15  | 1.059193853 |
| 24429590 | TQVPQYILDDFIQNDNR          | DEAH (Asp-Glu-Ala-His) box polypeptide 9 [Mus musculus]                                             | 2066.021  | 55.69  | 0.69925686  |
| 29243964 | TTRTNTNDIQNSSLR            | hypothetical protein LOC211936 [Mus musculus]                                                       | 1722.8381 | 22.41  | 0           |
| 6679237  | TVAVYSEQDQTGMHR            | pyruvate carboxylase [Mus musculus]                                                                 | 1721.7887 | 39.76  | 1.439975653 |
| 6679601  | TVFDEAIR                   | RAS-related C3 botulinum substrate 2 [Mus musculus]                                                 | 950.5001  | 45.18  | 1.223239254 |
| 8393988  | TVGYTVTAPEDTR              | phosphomannomutase 2 [Mus musculus]                                                                 | 1409.6906 | 42.21  | 1.020148227 |
| 31981679 | TVIIQSWGSPK                | heat shock protein 1 (chaperonin) [Mus musculus]                                                    | 1344.7097 | 57.17  | 1.057393646 |
| 33859811 | TVLGVPEVLLGILPGAGGTQR      | hydroxyacyl-Coenzyme A dehydrogenase/3-ketoacyl-Coenzyme A thiolase/enoyl-Coenzyme A hydratase (tri | 2047.196  | 62.56  | 1.367374439 |
| 31980648 | TVLIMELINNVAK              | ATP synthase, H+ transporting mitochondrial F1 complex, beta subunit [Mus musculus]                 | 1457.8409 | 74.36  | 1.253323865 |
| 21729786 | TVQQHAGETDPVTTMR           | hydroxyacyl glutathione hydrolase [Mus musculus]                                                    | 1770.8364 | 53.16  | 1.764302033 |
| 21361209 | TVTAMDVVYALK               | germinal histone H4 [Mus musculus]                                                                  | 1310.718  | 57.51  | 0           |
| 8567336  | TVTLELLDNGAGADATK          | chloride channel calcium activated 3 [Mus musculus]                                                 | 1688.8672 | 110.37 | 0.173575396 |
| 31981690 | TVTNAVVTVPAYFNDSQR         | heat shock protein 8 [Mus musculus]                                                                 | 1982.006  | 93.91  | 1.035678311 |
| 12963563 | TVTQVVPAEQENGQR            | apoptotic chromatin condensation inducer 1 [Mus musculus]                                           | 1712.8568 | 38.75  | 0.869695338 |
| 31981722 | TWNDPSVQQDIK               | heat shock 70kD protein 5 (glucose-regulated protein) [Mus musculus]                                | 1430.6888 | 75.62  | 1.318309727 |

2 Deamidation (NQ)

|          |                      |                  |                                                                                                      |           |        |             |
|----------|----------------------|------------------|------------------------------------------------------------------------------------------------------|-----------|--------|-------------|
| 29789080 | TYLPSQVSR            |                  | coatomer protein complex, subunit beta 2 (beta prime) [Mus musculus]                                 | 1050.5621 | 40.2   | 0.862406466 |
| 13384828 | TYNFLPEYLASTQK       |                  | serine (or cysteine) proteinase inhibitor, clade B, member 1a [Mus musculus]                         | 1674.8358 | 54.17  | 1.068562709 |
| 18087805 | TYSYLTPLDWK          |                  | ribosomal protein S2 [Mus musculus]                                                                  | 1386.7096 | 29.82  | 0           |
| 13384736 | VAAPDVVPTLDTVR       |                  | dynein, cytoplasmic, heavy chain 1 [Mus musculus]                                                    | 1551.8846 | 39.81  | 1.532587726 |
| 21704128 | VAAVQPPEEGPSR        |                  | eukaryotic translation initiation factor 4B [Mus musculus]                                           | 1336.6893 | 58.37  | 1.013453797 |
| 63471580 | VADIGLAAWGR          |                  | PREDICTED: similar to S-adenosylhomocysteine hydrolase [Mus musculus]                                | 1128.6274 | 40.48  | 1.249709772 |
| 31981549 | VAELNPDENCIR         |                  | sulfide quinone reductase-like [Mus musculus]                                                        | 1372.6591 | 20.88  | 2.051853756 |
| 21312260 | VAEQTPLSALYLASLIK    |                  | aldehyde dehydrogenase 1 family, member B1 [Mus musculus]                                            | 1817.0411 | 57.45  | 1.17166399  |
| 6753036  | VAEQTPLTALYVANLIK    |                  | aldehyde dehydrogenase 2, mitochondrial [Mus musculus]                                               | 1844.0515 | 55.11  | 2.213139494 |
| 9910556  | VAGQDGSVVQFK         |                  | SMT3 (suppressor of mif two, 3) homolog 1 [Mus musculus]                                             | 1234.6366 | 48.12  | 1.075436977 |
| 7304993  | VAGTGEGGLEELVEELNSGK |                  | drebrin-like [Mus musculus]                                                                          | 1987.9631 | 31.91  | 0           |
| 63476037 | VAIAQFSDDVR          |                  | PREDICTED: procollagen, type VI, alpha 3 [Mus musculus]                                              | 1220.6326 | 40.64  | 1.023892917 |
| 31980648 | VALTGLTVAEYFR        |                  | ATP synthase, H+ transporting mitochondrial F1 complex, beta subunit [Mus musculus]                  | 1439.7885 | 78.03  | 1.130068106 |
| 18079339 | VAMSHFEPSEYIR        |                  | aconitase 2, mitochondrial [Mus musculus]                                                            | 1565.7422 | 55.24  | 1.325697077 |
| 31542559 | VAPAPAGVFTDIPISNIR   |                  | dihydrolipoamide S-acetyltransferase (E2 component of pyruvate dehydrogenase complex) [Mus musculus] | 1838.0216 | 28.06  | 1.389055176 |
| 6671507  | VAPEEHPTLLTEAPLNPK   |                  | actin, alpha 2, smooth muscle, aorta [Mus musculus]                                                  | 1956.0463 | 105.97 | 0.848796967 |
| 6671509  | VAPEEHPVLLTEAPLNPK   |                  | actin, beta, cytoplasmic [Mus musculus]                                                              | 1954.0642 | 86.09  | 0.783031326 |
| 54607037 | VAPGYTYVTAEQDAR      |                  | integrin beta 4 isoform 2 [Mus musculus]                                                             | 1640.7902 | 33.61  | 1.786685667 |
| 6753138  | VAPPGLTQIPQIQK       |                  | Na+/K+ -ATPase beta 1 subunit [Mus musculus]                                                         | 1489.8694 | 21.78  | 0           |
| 13385598 | VAQLEQVYIR           |                  | small nuclear ribonucleoprotein D3 [Mus musculus]                                                    | 1218.6884 | 21.2   | 0.937944068 |
| 63746482 | VAQPSITDNKDGTVTVR    |                  | PREDICTED: filamin, alpha [Mus musculus]                                                             | 1800.9447 | 27.74  | 0           |
| 27545181 | VAQPTAEQAQAFK        |                  | v-raf murine sarcoma 3611 viral oncogene homolog [Mus musculus]                                      | 1388.701  | 33.24  | 0           |
| 33563270 | VASSVPVENFTIHGGLSR   |                  | oxoglutarate dehydrogenase (lipoamide) [Mus musculus]                                                | 1869.9799 | 33.27  | 1.418908864 |
| 63746482 | VATVPQHATSGPGPADVSK  |                  | PREDICTED: filamin, alpha [Mus musculus]                                                             | 1818.9385 | 83.75  | 1.630586832 |
| 136429   | VATVSLPR             |                  | Trypsin precursor                                                                                    | 842.5146  | 42.72  | 0           |
| 31982186 | VAVLGASGGIGQPLSLLLK  |                  | malate dehydrogenase 2, NAD (mitochondrial) [Mus musculus]                                           | 1793.0912 | 103.27 | 1.394439774 |
| 33859580 | VAVNDAHLLQYNHR       |                  | galactin-3 [Mus musculus]                                                                            | 1649.85   | 53.13  | 1.774245588 |
| 31982030 | VAVSADPNVNPVIVTR     |                  | Rho GDP dissociation inhibitor (GDI) alpha [Mus musculus]                                            | 1650.9224 | 56.94  | 1.488132116 |
| 6753484  | VAVVQYSGQQQPPGR      |                  | procollagen, type VI, alpha 1 [Mus musculus]                                                         | 1701.8684 | 67.34  | 0.570070544 |
| 63476037 | VAVVTYNNEVTTEIR      |                  | PREDICTED: procollagen, type VI, alpha 3 [Mus musculus]                                              | 1707.8911 | 72.73  | 1.153118845 |
| 63556656 | VAYDLVYYVVR          |                  | PREDICTED: RIKEN cDNA A430096B05 gene [Mus musculus]                                                 | 1260.6674 | 35.94  | 0.312991044 |
| 8567336  | VAYLQVPGTAK          |                  | chloride channel calcium activated 3 [Mus musculus]                                                  | 1146.6476 | 69.62  | 0.225409662 |
| 46849705 | VAYNPFPGQGFFDLSIR    |                  | lectin, galactose binding, soluble 4 [Mus musculus]                                                  | 1927.9747 | 58.1   | 1.157032265 |
| 31541988 | VCIGDAEVGSLNAVQK     | Deamidation (NQ) | hypothetical protein LOC237465 [Mus musculus]                                                        | 1603.778  | 22.46  | 1.162975878 |
| 31981647 | VDAQFGGVDQR          |                  | tyrosyl-tRNA synthetase [Mus musculus]                                                               | 1191.5757 | 47.38  | 1.099469769 |
| 42415475 | VDATEESDLAQYGVVR     |                  | prolyl 4-hydroxylase, beta polypeptide [Mus musculus]                                                | 1780.8398 | 105.27 | 1.109039388 |
| 54607098 | VDEYDYSKPIGQQQK      |                  | succinate dehydrogenase Fp subunit [Mus musculus]                                                    | 1797.8691 | 89.41  | 1.115241713 |
| 31982186 | VDFPQQLATLTGR        |                  | malate dehydrogenase 2, NAD (mitochondrial) [Mus musculus]                                           | 1560.7938 | 38.61  | 0.588904075 |
| 6680121  | VDILENQAMDR          |                  | glutathione S-transferase, mu 2 [Mus musculus]                                                       | 1404.6849 | 39.8   | 1.949757843 |
| 63738313 | VDINAPDVDR           |                  | PREDICTED: similar to AHNAC [Mus musculus]                                                           | 1212.6188 | 31.25  | 1.822538272 |
| 63556656 | VDLPATVLTSSVSR       |                  | PREDICTED: RIKEN cDNA A430096B05 gene [Mus musculus]                                                 | 1456.8435 | 81.76  | 0.274825883 |
| 20149728 | VDNSSLTGESEPPAR      |                  | ATPase, H+/K+ transporting, nongastric, alpha polypeptide [Mus musculus]                             | 1589.74   | 36.57  | 5.5248045   |
| 21450277 | VDNSSLTGESEPPQR      |                  | Na+/K+ -ATPase alpha 1 subunit [Mus musculus]                                                        | 1619.7487 | 81.53  | 1.064385158 |
| 7710042  | VDQIQEIVTGNPTVIK     |                  | IQ motif containing GTPase activating protein 1 [Mus musculus]                                       | 1753.9688 | 20.94  | 0           |
| 33186863 | VDTWFNQPAR           |                  | ribosomal protein L13 [Mus musculus]                                                                 | 1233.6039 | 46.94  | 0.984958712 |
| 63522357 | VDVEALENSPGATYIR     |                  | PREDICTED: signal recognition particle 72 [Mus musculus]                                             | 1733.8698 | 20.29  | 0.761803497 |
| 63746482 | VDVGKQDEFTVK         |                  | PREDICTED: filamin, alpha [Mus musculus]                                                             | 1364.6838 | 31.08  | 1.363624522 |
| 33859722 | VDVTEQTGLSGR         |                  | thioredoxin domain containing 1 [Mus musculus]                                                       | 1261.6295 | 45.7   | 1.274508559 |
| 7305295  | VDYNASAWLTK          |                  | myosin, heavy polypeptide 11, smooth muscle [Mus musculus]                                           | 1267.6394 | 66.15  | 2.121059577 |
| 21313536 | VEGGTPLFTLR          |                  | dihydrolipoamide S-succinyltransferase (E2 component of 2-oxo-glutarate complex) [Mus musculus]      | 1189.6658 | 32.47  | 1.136722328 |
| 31543315 | VEGSEPTTFNLFIGNLNPNK |                  | nucleolin [Mus musculus]                                                                             | 2288.1389 | 35.29  | 0.672706695 |
| 7106435  | VEGYSGTAGDSMNYHNGR   |                  | tenascin C [Mus musculus]                                                                            | 1914.8112 | 24.6   | 5.374554416 |
| 31981722 | VEIANDQGNR           |                  | heat shock 70kD protein 5 (glucose-regulated protein) [Mus musculus]                                 | 1228.6322 | 52.11  | 1.278492801 |
| 50080209 | VEIANDQGNR           |                  | heat shock protein 1A [Mus musculus]                                                                 | 1228.6322 | 52.11  | 1.278492801 |
| 7305163  | VEIANDQGNR           |                  | heat shock protein 1-like [Mus musculus]                                                             | 1228.6322 | 52.11  | 1.278492801 |
| 31981690 | VEIANDQGNR           |                  | heat shock protein 8 [Mus musculus]                                                                  | 1228.6322 | 52.11  | 1.278492801 |
| 63664182 | VEIANDQGNR           |                  | PREDICTED: similar to heat shock protein 8 [Mus musculus]                                            | 1228.6322 | 52.11  | 1.278492801 |
| 33563250 | VELQELNDR            |                  | desmin [Mus musculus]                                                                                | 1115.5747 | 48.33  | 1.803790897 |
| 31982755 | VELQELNDR            |                  | vimentin [Mus musculus]                                                                              | 1115.5747 | 48.33  | 1.803790897 |
| 63746482 | VEPGLGADNSVVR        |                  | PREDICTED: filamin, alpha [Mus musculus]                                                             | 1312.6847 | 69.25  | 1.702739666 |

|          |                               |                                                                                                     |           |       |             |
|----------|-------------------------------|-----------------------------------------------------------------------------------------------------|-----------|-------|-------------|
| 20373167 | VEQLGAEAGNVEESQK              | LUC7-like 2 [Mus musculus]                                                                          | 1616.7794 | 87.05 | 1.343652186 |
| 16716471 | VEQLSSGLEHNDLEAHSPEQPPR       | hypothetical protein LOC94184 [Mus musculus]                                                        | 2569.2268 | 66.86 | 0.877100284 |
| 31542333 | VESVFETLVEDSPEEESTLTK         | hypoxia up-regulated 1 [Mus musculus]                                                               | 2368.1487 | 68.77 | 0.713508464 |
| 51873060 | VETGVLKPGMVVTFAPVNVTEVK       | eukaryotic translation elongation factor 1 alpha 1 [Mus musculus]                                   | 2515.3848 | 44.65 | 0.901109702 |
| 6753762  | VETSDEEIKDLHQR                | epoxide hydrolase 1, microsomal [Mus musculus]                                                      | 1698.8221 | 34.15 | 2.342097621 |
| 46849705 | VFANGQHLFDFSHR                | lectin, galactose binding, soluble 4 [Mus musculus]                                                 | 1675.8143 | 56.01 | 1.787357951 |
| 22203747 | VFAVVTDGR                     | procollagen, type VI, alpha 2 [Mus musculus]                                                        | 1076.5944 | 23.5  | 0           |
| 33859482 | VFDAIMNFR                     | eukaryotic translation elongation factor 2 [Mus musculus]                                           | 1112.566  | 37.27 | 0           |
| 21450625 | VFDMLNR                       | eukaryotic translation initiation factor 4A1 [Mus musculus]                                         | 894.4486  | 20.99 | 0.986433456 |
| 51771446 | VFDMLNR                       | PREDICTED: similar to eukaryotic translation initiation factor 4A, isoform 1 [Mus musculus]         | 894.4486  | 20.99 | 0.986433456 |
| 6755863  | VFITDDFHDMMPK                 | tumor rejection antigen gp96 [Mus musculus]                                                         | 1595.75   | 37.94 | 0.692391153 |
| 21361209 | VFLENVIR                      | germinal histone H4 [Mus musculus]                                                                  | 989.5858  | 42.54 | 0.58834535  |
| 8567338  | VFNETPINPR                    | coatamer protein complex, subunit gamma [Mus musculus]                                              | 1186.611  | 22.43 | 1.153855347 |
| 6753484  | VFSVAITPDHLEPR                | procollagen, type VI, alpha 1 [Mus musculus]                                                        | 1580.8519 | 39.89 | 2.5800184   |
| 31981549 | VGAENVAIVEPSE                 | sulfide quinone reductase-like [Mus musculus]                                                       | 1469.7616 | 69.5  | 1.234725193 |
| 6755809  | VGAIPANALDDGQWSQGLISAAR       | talin 1 [Mus musculus]                                                                              | 2310.1802 | 20.24 | 1.097682392 |
| 14149645 | VGDTSLDPNDFDFTVTR             | methyl CpG binding protein 2 [Mus musculus]                                                         | 1955.9183 | 34.64 | 1.223329497 |
| 51491845 | VGEQAQVVIIDMNDPSNPIR          | clathrin, heavy polypeptide (Hc) [Mus musculus]                                                     | 2195.1289 | 39.86 | 1.162421082 |
| 31560737 | VGIGAFPTQDNEIGELLQTR          | adenylosuccinate synthetase, non muscle [Mus musculus]                                              | 2287.1477 | 54.58 | 1.289091503 |
| 63638100 | VGINYQPPTVVPGGDLAK            | PREDICTED: similar to tubulin, alpha 1 [Mus musculus]                                               | 1824.9878 | 36.44 | 1.043625447 |
| 6755901  | VGINYQPPTVVPGGDLAK            | tubulin, alpha 1 [Mus musculus]                                                                     | 1824.9878 | 36.44 | 1.043625447 |
| 34740335 | VGINYQPPTVVPGGDLAK            | tubulin, alpha 2 [Mus musculus]                                                                     | 1824.9878 | 36.44 | 1.043625447 |
| 6678467  | VGINYQPPTVVPGGDLAK            | tubulin, alpha 4 [Mus musculus]                                                                     | 1824.9878 | 36.44 | 1.043625447 |
| 6678469  | VGINYQPPTVVPGGDLAK            | tubulin, alpha 6 [Mus musculus]                                                                     | 1824.9878 | 36.44 | 1.043625447 |
| 18079339 | VGLIGSCTNSSYEDMGR             | aconitase 2, mitochondrial [Mus musculus]                                                           | 1788.8033 | 26.35 | 0           |
| 6680117  | VGLLEALLPGQPEAVAR             | glutathione synthetase [Mus musculus]                                                               | 1732.9988 | 44.92 | 1.13764494  |
| 7657429  | VGLSDLYNGQILETIGGK            | osteoblast specific factor 2 (fasciclin I-like) [Mus musculus]                                      | 1876.9718 | 43.38 | 0           |
| 63476037 | VGLVQYNSDPTDEFFLR             | PREDICTED: procollagen, type VI, alpha 3 [Mus musculus]                                             | 1999.9766 | 32.96 | 0.864686972 |
| 63476037 | VGLVQYNSDPTDEFFLR             | PREDICTED: procollagen, type VI, alpha 3 [Mus musculus]                                             | 2000.9613 | 54.39 | 0           |
| 6753620  | VGNLGLATSFNFR                 | DEAD/H (Asp-Glu-Ala-Asp/His) box polypeptide 3, X-linked [Mus musculus]                             | 1524.7848 | 29.17 | 1.0671415   |
| 21312260 | VGNPFELDTQQGPQVKEQFER         | aldehyde dehydrogenase 1 family, member B1 [Mus musculus]                                           | 2561.2249 | 68.73 | 1.3817746   |
| 6753738  | VGQIEVRPQIVSK                 | eukaryotic translation initiation factor 2, subunit 3, structural gene X-linked [Mus musculus]      | 1510.8662 | 29.23 | 2.034832187 |
| 63746482 | VGSAADIPINISETDLSSLTATVPPSSGR | PREDICTED: filamin, alpha [Mus musculus]                                                            | 2893.5547 | 55.11 | 1.262437727 |
| 16716467 | VGSGDTNNFPYLEK                | N-acetylneuraminic acid synthase (sialic acid synthase) [Mus musculus]                              | 1540.7218 | 34.76 | 1.330568319 |
| 46849705 | VGSSGDIALHLNPR                | lectin, galactose binding, soluble 4 [Mus musculus]                                                 | 1435.7684 | 93.34 | 1.233957892 |
| 31543902 | VGVKPVGSDPDFQPELSGAGSR        | thioredoxin-like 1 [Mus musculus]                                                                   | 2199.1084 | 63.12 | 0.949040022 |
| 29126205 | VGVPTEGALTNR                  | acetyl-Coenzyme A acyltransferase 2 (mitochondrial 3-oxoacyl-Coenzyme A thiolase) [Mus musculus]    | 1427.7917 | 67.29 | 1.555025093 |
| 63680429 | VGVSQQPEDSQQLPGER             | PREDICTED: plexin B2 [Mus musculus]                                                                 | 1968.9312 | 47.64 | 1.301196789 |
| 30348966 | VIESTQDLGNDLAGVMALQR          | spectrin beta 2 isoform 1 [Mus musculus]                                                            | 2130.0908 | 94.18 | 1.0062707   |
| 7305085  | VIFLEDDDDVAIVVDGR             | glutamine fructose-6-phosphate transaminase 1 [Mus musculus]                                        | 1732.8691 | 62.59 | 1.29388851  |
| 6679937  | VIIAPSADAPMFVGMVNHKE          | similar to glyceraldehyde-3-phosphate dehydrogenase [Mus musculus]                                  | 2213.1147 | 80.58 | 0           |
| 30023842 | VINQILTEMDGMSTK               | valosin containing protein [Mus musculus]                                                           | 1679.8068 | 27.36 | 0.898352836 |
| 45597447 | VISLSGEHSIGR                  | superoxide dismutase 1, soluble [Mus musculus]                                                      | 1367.7671 | 53.78 | 1.296114335 |
| 6678321  | VISTITNNIQIIEIDTFETLR         | transforming growth factor, beta induced [Mus musculus]                                             | 2690.4155 | 25.09 | 1.347159421 |
| 31982275 | VLATAFDTTLGGR                 | heat shock protein 4 [Mus musculus]                                                                 | 1321.7153 | 45.4  | 2.284124865 |
| 11230802 | VLAVNQENEHLMEDYER             | actinin alpha 4 [Mus musculus]                                                                      | 2088.9658 | 58.92 | 1.493986053 |
| 6678449  | VLDASWYSPGTR                  | thiosulfate sulfurtransferase, mitochondrial [Mus musculus]                                         | 1351.6678 | 44.28 | 1.498233799 |
| 6680606  | VDELTLAR                      | keratin complex 1, acidic, gene 19 [Mus musculus]                                                   | 1029.6038 | 34.35 | 1.615955516 |
| 125081   | VDELTLAR                      | Keratin, type I cytoskeletal 15 (Cytokeratin 15) (K15) (CK 15)                                      | 1029.6038 | 34.35 | 1.615955516 |
| 51766008 | VLDNTWPAAPYR                  | PREDICTED: myosin IA [Mus musculus]                                                                 | 1402.7097 | 31.18 | 1.165589219 |
| 15617203 | VLDNYLTSPLEEVDETSAEDEGISQR    | chloride intracellular channel 1 [Mus musculus]                                                     | 3006.3877 | 21.46 | 0.976295819 |
| 6678359  | VLDPFTIKPLDR                  | transketolase [Mus musculus]                                                                        | 1413.8099 | 32.23 | 1.070575848 |
| 40068493 | VLEEANQAINPK                  | DEAD box polypeptide 17 isoform 1 [Mus musculus]                                                    | 1325.7023 | 48.25 | 0           |
| 13385408 | VLEQLTGQTPVFSK                | ribosomal protein L11 [Mus musculus]                                                                | 1546.8452 | 57.38 | 1.444425957 |
| 63489754 | VLETAEDIQER                   | PREDICTED: similar to Spectrin alpha chain, brain (Spectrin, non-erythroid alpha chain) (Alpha-II s | 1302.6575 | 23.22 | 0           |
| 19923052 | VLEVPPIVYL                    | brain acyl-CoA hydrolase [Mus musculus]                                                             | 1297.7915 | 37.1  | 1.057464802 |
| 6754854  | VLFDTGLVNR                    | nidogen 1 [Mus musculus]                                                                            | 1230.6934 | 46.66 | 1.327208065 |
| 29336026 | VLGLLPEEITAMLR                | nonmuscle myosin heavy chain [Mus musculus]                                                         | 1554.8965 | 55.44 | 1.595164019 |
| 27804325 | VLGSQEALSPVHYEEK              | monoamine oxidase A [Mus musculus]                                                                  | 1785.8953 | 67.79 | 1.511079151 |
| 21450625 | VLITDLLAR                     | eukaryotic translation initiation factor 4A1 [Mus musculus]                                         | 1114.6992 | 21.33 | 1.137460403 |

|          |                          |                    |                                                                                                  |           |        |             |
|----------|--------------------------|--------------------|--------------------------------------------------------------------------------------------------|-----------|--------|-------------|
| 6755004  | VLIVSEDELPELYMRPPLSK     |                    | programmed cell death 8 [Mus musculus]                                                           | 2183.168  | 20.79  | 1.18688836  |
| 49402267 | VLLVTASNR                | Deamidation (NQ)   | hypothetical protein LOC99382 [Mus musculus]                                                     | 973.5502  | 20.72  | 0           |
| 6679291  | VLNNMEIGTSLYDEEGAK       |                    | phosphoglycerate kinase 1 [Mus musculus]                                                         | 1982.9397 | 57.5   | 1.012365463 |
| 13385036 | VLNSYVWGEDSTYK           |                    | ribosomal protein L15 [Mus musculus]                                                             | 1660.7915 | 53.41  | 0.834644376 |
| 7948997  | VLQDLVNDGPDPRPAGTR       |                    | PDZ and LIM domain 3 [Mus musculus]                                                              | 1937.9675 | 53.31  | 1.620471618 |
| 31542333 | VLQLINDNTATALSYGVFR      |                    | hypoxia up-regulated 1 [Mus musculus]                                                            | 2095.1106 | 45.77  | 1.044788656 |
| 13384736 | VLRPQVTAVAQQNQGEAPEPQDMK |                    | dynein, cytoplasmic, heavy chain 1 [Mus musculus]                                                | 2634.3259 | 26.03  | 1.271021777 |
| 6680748  | VLSIGDGIAR               |                    | ATP synthase, H+ transporting, mitochondrial F1 complex, alpha subunit, isoform 1 [Mus musculus] | 1000.5841 | 41.09  | 1.134093101 |
| 63556656 | VLSPLEYFR                |                    | PREDICTED: RIKEN cDNA A430096B05 gene [Mus musculus]                                             | 1123.6223 | 53.55  | 0.30517962  |
| 10946574 | VLTPELYAELR              |                    | creatine kinase, brain [Mus musculus]                                                            | 1303.7333 | 49.31  | 1.803262486 |
| 13569841 | VLVLDFTVPTPLGTR          |                    | thioredoxin reductase 1 [Mus musculus]                                                           | 1627.9465 | 24.81  | 1.302389905 |
| 63655455 | VLWLDEIQQAINEANVDENR     |                    | PREDICTED: similar to Ras GTPase-activating-like protein IQGAP2 [Mus musculus]                   | 2369.1746 | 43.19  | 1.315892058 |
| 12963539 | VMDNLNLPKQQQIDIAVPANMR   |                    | ETHE1 protein [Mus musculus]                                                                     | 2477.3088 | 39.64  | 1.214852664 |
| 6679078  | VMLGETNPPADSKPGTIR       |                    | nucleoside-diphosphate kinase 2 [Mus musculus]                                                   | 1785.9192 | 113.95 | 0.96746053  |
| 34576561 | VMQQQQQATQQQLPQK         |                    | splicing factor 3a, subunit 1 [Mus musculus]                                                     | 1911.9736 | 58.71  | 1.039212515 |
| 34576561 | VMQQQQQATQQQLPQK         | Oxidation (M)      | splicing factor 3a, subunit 1 [Mus musculus]                                                     | 1927.9623 | 60.01  | 0           |
| 31543113 | VNDDIIVNVVNTTLK          |                    | lymphocyte cytosolic protein 1 [Mus musculus]                                                    | 1743.9142 | 35.59  | 1.134789924 |
| 63607012 | VNEQLALR                 | 2 Deamidation (NQ) | PREDICTED: similar to centrosome protein cep290 [Mus musculus]                                   | 944.5101  | 30.09  | 0           |
| 31560611 | VNESTQNWHQLEINIGNFIK     |                    | calponin 1 [Mus musculus]                                                                        | 2271.1138 | 72.25  | 1.27503534  |
| 7305085  | VNFDDYTVNLGGLK           |                    | glutamine fructose-6-phosphate transaminase 1 [Mus musculus]                                     | 1554.7792 | 63.48  | 1.292420385 |
| 13384736 | VNFLPEIITLSK             |                    | dynein, cytoplasmic, heavy chain 1 [Mus musculus]                                                | 1373.8013 | 24.17  | 1.378302871 |
| 31560689 | VNFSPPGDTSNLFPGTWYLER    |                    | 3-hydroxy-3-methylglutaryl-Coenzyme A synthase 2 [Mus musculus]                                  | 2397.1511 | 33.51  | 1.414564371 |
| 33859482 | VNFTVDQIR                |                    | eukaryotic translation elongation factor 2 [Mus musculus]                                        | 1091.5846 | 45.6   | 0.773054467 |
| 6678752  | VNGEPLDLDPGQTLIYVDEK     |                    | lymphocyte antigen 74 [Mus musculus]                                                             | 2378.1638 | 28.6   | 1.706038373 |
| 63556656 | VNGVLMALPVYLAGGR         |                    | PREDICTED: RIKEN cDNA A430096B05 gene [Mus musculus]                                             | 1629.9205 | 53.69  | 0           |
| 63556656 | VNGVLMALPVYLAGGR         | Deamidation (NQ)   | PREDICTED: RIKEN cDNA A430096B05 gene [Mus musculus]                                             | 1630.9091 | 30.38  | 0           |
| 9790069  | VNIAFNVDMPEDSDTYLHR      |                    | HLA-B-associated transcript 1A [Mus musculus]                                                    | 2300.0376 | 63.67  | 0.780525858 |
| 6755963  | VNNSSLIGLGYTQLTKPGIK     |                    | voltage-dependent anion channel 1 [Mus musculus]                                                 | 2103.1853 | 47.73  | 2.692952955 |
| 6755965  | VNNSSLIGVGYTQLTRPGVK     |                    | voltage-dependent anion channel 2 [Mus musculus]                                                 | 2103.1616 | 69.2   | 0.897467221 |
| 6679439  | VNPTVFFDITADDEPLGR       |                    | peptidylprolyl isomerase A [Mus musculus]                                                        | 2005.9824 | 122.21 | 0.98638699  |
| 63746482 | VNQPASFAVSLNGAK          |                    | PREDICTED: filamin, alpha [Mus musculus]                                                         | 1502.7853 | 43.28  | 0.782048717 |
| 31981824 | VPAPEVASGPDPEEIEIR       |                    | ankyrin repeat domain 25 [Mus musculus]                                                          | 1791.8793 | 35.24  | 1.867447537 |
| 41322904 | VPAQQLQEAGILSQEELQR      |                    | plectin 1 isoform 1 [Mus musculus]                                                               | 2137.1277 | 20.62  | 0.955929617 |
| 13385168 | VPDFSDYR                 |                    | ubiquinol-cytochrome c reductase, Rieske iron-sulfur polypeptide 1 [Mus musculus]                | 998.4652  | 55.66  | 1.382181503 |
| 6755714  | VPENPPSMVFK              |                    | transgelin [Mus musculus]                                                                        | 1244.6301 | 36.61  | 2.207170015 |
| 18079351 | VPHNAAVQYDYR             |                    | major vault protein [Mus musculus]                                                               | 1531.7692 | 61.17  | 0           |
| 7305443  | VPPAINQFTQALDR           |                    | ribosomal protein L7a [Mus musculus]                                                             | 1569.8373 | 27.02  | 1.241384216 |
| 56119103 | VPSTEAELASSLMGLFEK       |                    | guanosine diphosphate (GDP) dissociation inhibitor 3 [Mus musculus]                              | 1980      | 98.86  | 0.962368    |
| 6679937  | VPTPNVSVVLDTCR           |                    | similar to glyceraldehyde-3-phosphate dehydrogenase [Mus musculus]                               | 1499.7963 | 90.18  | 1.199152474 |
| 6754004  | VPTTGIEYPFLENIIFR        |                    | guanine nucleotide binding protein, alpha 11 [Mus musculus]                                      | 2237.1792 | 41.83  | 1.324309147 |
| 37537522 | VPVDVAYQR                |                    | epiplakin 1 [Mus musculus]                                                                       | 1046.5663 | 33.66  | 1.337314376 |
| 46849705 | VPYVVALQGGTLVTR          |                    | lectin, galactose binding, soluble 4 [Mus musculus]                                              | 1429.8273 | 108.63 | 1.159801994 |
| 6671700  | VQDDEVGDGTTSTVTLAAELLR   |                    | chaperonin subunit 2 (beta) [Mus musculus]                                                       | 2288.1533 | 31.31  | 1.254637644 |
| 63552538 | VQEVEVPEDFGPVR           |                    | PREDICTED: echinoderm microtubule associated protein like 2 [Mus musculus]                       | 1599.8044 | 52.8   | 1.489191046 |
| 33469093 | VQIYHNPTANSFR            |                    | vasodilator-stimulated phosphoprotein [Mus musculus]                                             | 1546.7804 | 25.56  | 1.207559879 |
| 31982520 | VQPIYGGTNEIMK            |                    | acetyl-Coenzyme A dehydrogenase, long-chain [Mus musculus]                                       | 1449.7393 | 20.83  | 9.179180483 |
| 6754256  | VQQTVDLDFGR              |                    | heat shock protein 9A [Mus musculus]                                                             | 1290.6866 | 63.49  | 1.238075841 |
| 41322904 | VQSGSESVIQEYVDLR         |                    | plectin 1 isoform 1 [Mus musculus]                                                               | 1808.8818 | 24.3   | 0.986880959 |
| 6754482  | VRPASSAASVYAGAGGSGSR     |                    | keratin complex 1, acidic, gene 18 [Mus musculus]                                                | 1807.9102 | 62.89  | 0.801210809 |
| 21312216 | VSDVVDGNIQGR             |                    | gasdermin domain containing 1 [Mus musculus]                                                     | 1258.6368 | 26.04  | 1.632163236 |
| 37620153 | VSDVYDIEER               |                    | myosin, light polypeptide kinase telokin isoform [Mus musculus]                                  | 1224.5803 | 33.04  | 1.703894438 |
| 30348966 | VSEEAESQQWDTSK           |                    | spectrin beta 2 isoform 1 [Mus musculus]                                                         | 1623.7155 | 67.47  | 1.243276161 |
| 7106421  | VSEEAESQQWDTSK           |                    | spectrin beta 2 isoform 2 [Mus musculus]                                                         | 1623.7155 | 67.47  | 1.243276161 |
| 6679439  | VSFELFADK                |                    | peptidylprolyl isomerase A [Mus musculus]                                                        | 1055.5443 | 53.87  | 1.271588377 |
| 31982373 | VSISEGDDKIEYR            |                    | fibrillarlin [Mus musculus]                                                                      | 1510.7417 | 38     | 2.16768641  |
| 30520375 | VSMAPDGNGLYR             |                    | UDP-N-acetylglucosamine pyrophosphorylase 1 homolog [Mus musculus]                               | 1336.6332 | 20.21  | 1.404010931 |
| 63474408 | VSPSIQPPQSQPTSLSR        |                    | PREDICTED: RIKEN cDNA E030037J05 gene [Mus musculus]                                             | 1937.0104 | 36.14  | 1.487397228 |
| 63556656 | VSQHGSVDVVIETDFGLR       |                    | PREDICTED: RIKEN cDNA A430096B05 gene [Mus musculus]                                             | 1858.9307 | 33.4   | 0.293094091 |
| 38142460 | VSVISVEEPPQR             |                    | electron transferring flavoprotein, beta polypeptide [Mus musculus]                              | 1339.7224 | 34.68  | 1.091902185 |
| 31982169 | VSVVEPGNFIAATSLYSER      |                    | 3-hydroxybutyrate dehydrogenase (heart, mitochondrial) [Mus musculus]                            | 2136.1067 | 62.02  | 1.841164911 |

|          |                            |                                                                                                     |           |        |             |
|----------|----------------------------|-----------------------------------------------------------------------------------------------------|-----------|--------|-------------|
| 6753086  | VSYGIGEEHHDQEGR            | apurinic/apurimidinic endonuclease 1 [Mus musculus]                                                 | 1704.7501 | 61.54  | 1.601124034 |
| 31543605 | VTAEVVLVHPGGGSTSR          | ribophorin I [Mus musculus]                                                                         | 1665.8969 | 50.84  | 0.730776634 |
| 63746482 | VTAQGGPLEPSGNIANK          | PREDICTED: filamin, alpha [Mus musculus]                                                            | 1652.8599 | 89.3   | 1.322836959 |
| 63660302 | VTASGPGLSAYGVPASLPVEFAIDAR | PREDICTED: filamin B, beta [Mus musculus]                                                           | 2545.3235 | 48.76  | 0.882494011 |
| 31560353 | VTASSENHVGENDENQER         | solute carrier family 6 (neurotransmitter transporter), member 14 [Mus musculus]                    | 2161.9402 | 89.81  | 0           |
| 18079351 | VTGEEWLVR                  | major vault protein [Mus musculus]                                                                  | 1088.5728 | 27     | 1.222270362 |
| 31981722 | VTHAVVTVPAYFNDAQR          | heat shock 70kD protein 5 (glucose-regulated protein) [Mus musculus]                                | 1887.9739 | 68.79  | 0.633258337 |
| 20799907 | VTIAQGGVLPNIQAVLLPK        | histone 2, H2aa1 [Mus musculus]                                                                     | 1931.1746 | 107.15 | 0.767534229 |
| 63556656 | VTIPGNYIK                  | PREDICTED: RIKEN cDNA A430096B05 gene [Mus musculus]                                                | 1054.558  | 34.37  | 0.228752499 |
| 54607098 | VTLEYRVIDK                 | succinate dehydrogenase Fp subunit [Mus musculus]                                                   | 1332.7471 | 33.71  | 0           |
| 8393150  | VTPPEGYDVVTVFR             | carboxyl terminal LIM domain protein 1 [Mus musculus]                                               | 1578.8193 | 42.52  | 1.306714917 |
| 6755963  | VTQSNFAVGK                 | voltage-dependent anion channel 1 [Mus musculus]                                                    | 1213.6206 | 77.49  | 1.495331191 |
| 7305167  | VTVLEGDILTQYLR             | hydroxysteroid dehydrogenase-6, delta<5>-3-beta [Mus musculus]                                      | 1734.9382 | 25.29  | 1.019480786 |
| 63746482 | VTYTPMAPGSYLISIK           | PREDICTED: filamin, alpha [Mus musculus]                                                            | 1740.9144 | 43.99  | 1.625754287 |
| 6754084  | VTYVDFLAYDILDQYR           | glutathione S-transferase, mu 1 [Mus musculus]                                                      | 1993.9967 | 64.34  | 1.391427316 |
| 58037117 | VVAEPVELAQEFR              | NADH dehydrogenase (ubiquinone) Fe-S protein 3 [Mus musculus]                                       | 1486.7959 | 36.89  | 1.360471484 |
| 6671664  | VVDDWANDGWGLK              | calnexin [Mus musculus]                                                                             | 1474.701  | 56.82  | 0           |
| 31980648 | VVDLLAPYAK                 | ATP synthase, H+ transporting mitochondrial F1 complex, beta subunit [Mus musculus]                 | 1088.6335 | 46.84  | 1.318853326 |
| 21450241 | VVEEAPSIFLDPETR            | propionyl-Coenzyme A carboxylase, alpha polypeptide [Mus musculus]                                  | 1701.8857 | 22.61  | 0           |
| 46593021 | VVELLADIVQNSLSDSQIEK       | ubiquinol-cytochrome c reductase core protein 1 [Mus musculus]                                      | 2329.2104 | 68.28  | 1.040297435 |
| 63476037 | VVESLDVGPDR                | PREDICTED: procollagen, type VI, alpha 3 [Mus musculus]                                             | 1185.6171 | 39.56  | 0.995039348 |
| 46849705 | VVFNTMQSGQWKG              | lectin, galactose binding, soluble 4 [Mus musculus]                                                 | 1481.7227 | 71.29  | 1.297430764 |
| 63476037 | VVIHFTDGADGMADLYR          | PREDICTED: procollagen, type VI, alpha 3 [Mus musculus]                                             | 1994.9056 | 24.3   | 2.123927134 |
| 34538601 | VVLPMEPIR                  | cytochrome c oxidase subunit II [Mus musculus]                                                      | 1166.7029 | 28.48  | 1.659140817 |
| 26006861 | VVPVADIITPNQFEAELLSGR      | pyridoxal (pyridoxine, vitamin B6) kinase [Mus musculus]                                            | 2268.2214 | 24.92  | 1.196751576 |
| 19527092 | VVQVSAGDSHTAALTEDGR        | chromosome condensation 1 [Mus musculus]                                                            | 1912.9305 | 62.28  | 2.277033732 |
| 7305295  | VVSSVLQLGNIVFK             | myosin, heavy polypeptide 11, smooth muscle [Mus musculus]                                          | 1502.8905 | 93.89  | 1.889684407 |
| 13385624 | VVTDTEDELAR                | eukaryotic translation initiation factor 2, subunit 1 alpha [Mus musculus]                          | 1348.6606 | 49.54  | 0           |
| 51556274 | VVTIAPGLFATPLLTLPEK        | hydroxyacyl-Coenzyme A dehydrogenase type II [Mus musculus]                                         | 2081.2231 | 66.71  | 1.263514647 |
| 46849705 | VVVGNSFYEYGH               | lectin, galactose binding, soluble 4 [Mus musculus]                                                 | 1640.785  | 77.65  | 1.109373632 |
| 46849705 | VVVGNSFYEYGH               | lectin, galactose binding, soluble 4 [Mus musculus]                                                 | 1641.7743 | 49.17  | 1.707443835 |
| 6677773  | VWLDPNETNEIANANSR          | ribosomal protein L19 [Mus musculus]                                                                | 1942.924  | 77.06  | 0.783693689 |
| 45387933 | VWQLQLDSFQTAAR             | UDP-glucose ceramide glucosyltransferase-like 1 [Mus musculus]                                      | 1662.8586 | 32.54  | 0           |
| 6680047  | VWQVTIGTR                  | guanine nucleotide binding protein (G protein), beta polypeptide 2 like 1 [Mus musculus]            | 1059.5962 | 22.34  | 1.231721426 |
| 31543474 | VYAEANSQESADR              | phosphoglucomutase 3 [Mus musculus]                                                                 | 1439.6417 | 44.9   | 0.98049292  |
| 21312950 | VYDQMPEPR                  | NADH dehydrogenase (ubiquinone) Fe-S protein 7 [Mus musculus]                                       | 1134.5283 | 35.63  | 1.148330149 |
| 46593021 | VYEEDAVPGLTPCR             | ubiquinol-cytochrome c reductase core protein 1 [Mus musculus]                                      | 1548.7344 | 41.08  | 1.180268425 |
| 63481281 | VYEELLAIPVVR               | PREDICTED: glutamyl-prolyl-tRNA synthetase [Mus musculus]                                           | 1400.8215 | 43.31  | 0           |
| 41322904 | VYHDPSTQEPVTVSQQQR         | plectin 1 isoform 1 [Mus musculus]                                                                  | 2276.1001 | 60     | 1.173731658 |
| 33859686 | VYWDNGAQIISPHDR            | phosphoglucomutase 1 [Mus musculus]                                                                 | 1770.8561 | 20.64  | 8.170416221 |
| 42734399 | WAEDQALYAEER               | desmuslin isoform H [Mus musculus]                                                                  | 1551.7104 | 40.62  | 1.765758822 |
| 30023842 | WALSQSNPSALR               | valosin containing protein [Mus musculus]                                                           | 1329.6927 | 73.53  | 1.026793627 |
| 6754984  | WDDGLDQYR                  | 3'-phosphoadenosine 5'-phosphosulfate synthase 2 [Mus musculus]                                     | 1167.5103 | 69.99  | 1.799828659 |
| 31981892 | WDDPYDIAR                  | Rho GTPase activating protein 1 [Mus musculus]                                                      | 1313.5851 | 40.89  | 2.24313286  |
| 6753498  | WDYDKNEWK                  | cytochrome c oxidase subunit IV isoform 1 [Mus musculus]                                            | 1283.5811 | 30.26  | 0.885203172 |
| 1346343  | WELLQQVDTSTR               | Keratin, type II cytoskeletal 1 (Cytokeratin 1) (K1) (CK 1) (67 kDa cytokeratin) (Hair alpha protei | 1475.7559 | 69.52  | 0.075052741 |
| 63746482 | WGDEHIPGSPYR               | PREDICTED: filamin, alpha [Mus musculus]                                                            | 1413.6565 | 74.58  | 1.2351998   |
| 6679937  | WGEAGAEYVVESTGVFTTMEK      | similar to glyceraldehyde-3-phosphate dehydrogenase [Mus musculus]                                  | 2291.0466 | 44.07  | 1.3855473   |
| 31559916 | WGTLTDCVVMR                | heterogeneous nuclear ribonucleoprotein A3 isoform b [Mus musculus]                                 | 1280.6196 | 27.24  | 0.994674516 |
| 8567336  | WGVFNEYNDEK                | chloride channel calcium activated 3 [Mus musculus]                                                 | 1514.6576 | 87.85  | 0           |
| 31543942 | WIDNPTVDDR                 | vinculin [Mus musculus]                                                                             | 1230.5782 | 20.75  | 1.785460172 |
| 41322904 | WQAVLAQTDVDR               | plectin 1 isoform 1 [Mus musculus]                                                                  | 1286.6848 | 24.77  | 2.22358841  |
| 63517139 | WQNNLLPSR                  | PREDICTED: similar to Rps15a protein [Mus musculus]                                                 | 1127.6045 | 36.5   | 0           |
| 13624315 | WSLLQQQK                   | keratin complex 2, basic, gene 8 [Mus musculus]                                                     | 1030.5742 | 37.87  | 1.45196051  |
| 2506774  | WSLLQQQK                   | Keratin, type II cytoskeletal 8 (Cytokeratin 8) (K8) (CK 8)                                         | 1030.5742 | 37.87  | 1.45196051  |
| 63565108 | WSLLQQQK                   | PREDICTED: similar to cytokeratin EndoA - mouse [Mus musculus]                                      | 1030.5742 | 37.87  | 1.45196051  |
| 27804325 | WVDVGGAYVGPTQNR            | monoamine oxidase A [Mus musculus]                                                                  | 1618.7986 | 98.16  | 1.895944471 |
| 21450277 | WVNDVEDSYGQQWTYEQR         | Na+/K+ -ATPase alpha 1 subunit [Mus musculus]                                                       | 2303.0015 | 115.37 | 1.192877698 |
| 21704206 | WVQQNIAHFGGNPDR            | carboxylesterase 2 [Mus musculus]                                                                   | 1738.8499 | 29.7   | 1.489466561 |
| 18079339 | WVVIGDENYGEGBSSR           | aconitase 2, mitochondrial [Mus musculus]                                                           | 1667.7435 | 47.13  | 0.323337189 |

|          |                         |                                                                                                     |           |        |             |
|----------|-------------------------|-----------------------------------------------------------------------------------------------------|-----------|--------|-------------|
| 31981549 | YADALQEIR               | sulfide quinone reductase-like [Mus musculus]                                                       | 1191.641  | 56.51  | 1.25885772  |
| 31981983 | YAELEEQVR               | stromal interaction molecule 1 [Mus musculus]                                                       | 1265.6008 | 40.72  | 1.059408046 |
| 9790219  | YALYDASFETK             | destrin [Mus musculus]                                                                              | 1307.6191 | 77.99  | 1.194370866 |
| 6680924  | YALYDATYETK             | cofilin 1, non-muscle [Mus musculus]                                                                | 1337.6271 | 79.84  | 1.393131698 |
| 29244560 | YASASEPTEIYR            | hypothetical protein LOC331063 [Mus musculus]                                                       | 1386.6578 | 72.76  | 0.375666686 |
| 26190606 | YDFGIYDDPEITLER         | ER-resident protein ERdj5 [Mus musculus]                                                            | 2073.9753 | 21.9   | 0           |
| 6753262  | YDPPLEDGAMPARS          | capping protein (actin filament) muscle Z-line, beta [Mus musculus]                                 | 1518.6934 | 39     | 1.390159073 |
| 21704066 | YDPTIEDSYR              | RAS-related protein-1a [Mus musculus]                                                               | 1258.5646 | 46.87  | 1.033356079 |
| 37497112 | YDSRPGGYGYGR            | RNA binding motif protein 3 [Mus musculus]                                                          | 1567.6953 | 20.48  | 2.600169957 |
| 6754180  | YEAFAQDEFQER            | hephaestin [Mus musculus]                                                                           | 1562.6805 | 24.72  | 1.594932694 |
| 9790051  | YEASYDMSDSGK            | phosphofructokinase, platelet [Mus musculus]                                                        | 1352.5264 | 44.74  | 4.385170423 |
| 6679545  | YEDAVQFIR               | protein tyrosine phosphatase 4a2 [Mus musculus]                                                     | 1140.5726 | 21.59  | 1.575736497 |
| 21313144 | YEDFKDEGSENAVK          | GTP-binding protein PTD004 [Mus musculus]                                                           | 1630.7229 | 77.86  | 0.722799836 |
| 16716471 | YEDFVVDGFNVLYNK         | hypothetical protein LOC94184 [Mus musculus]                                                        | 1821.8647 | 77.31  | 1.279155764 |
| 22267442 | YEDSNNLGTSHLLR          | ubiquinol cytochrome c reductase core protein 2 [Mus musculus]                                      | 1618.7848 | 44.45  | 0.821467016 |
| 27370092 | YEEIDNAPPEER            | Tu translation elongation factor, mitochondrial [Mus musculus]                                      | 1364.5984 | 50.9   | 1.247938733 |
| 1346343  | YEELQITAGR              | Keratin, type II cytoskeletal 1 (Cytokeratin 1) (K1) (CK 1) (67 kDa cytokeratin) (Hair alpha protei | 1179.6069 | 81.98  | 0           |
| 13624315 | YEELQTLAGK              | keratin complex 2, basic, gene 8 [Mus musculus]                                                     | 1151.5956 | 84.85  | 1.531649154 |
| 7305295  | YEILAAAIKPK             | myosin, heavy polypeptide 11, smooth muscle [Mus musculus]                                          | 1202.6779 | 65.58  | 2.110706895 |
| 13385998 | YESSALPAGQLTSLPDYASR    | TNF receptor-associated protein 1 [Mus musculus]                                                    | 2126.0447 | 39.67  | 1.431673217 |
| 33859482 | YEWDAVEAR               | eukaryotic translation elongation factor 2 [Mus musculus]                                           | 1138.5251 | 58.86  | 0.938854267 |
| 27370516 | YFDLGLPNR               | isocitrate dehydrogenase 2 (NADP+), mitochondrial [Mus musculus]                                    | 1094.5741 | 40.55  | 1.363867191 |
| 6678055  | YFILPDSLPLDILLVDVEPK    | small nuclear ribonucleoprotein D1 [Mus musculus]                                                   | 2287.2427 | 46.73  | 1.243020539 |
| 30409988 | YFNPIGAHASGR            | galactose-4-epimerase, UDP [Mus musculus]                                                           | 1289.6389 | 23.17  | 3.146185381 |
| 51764087 | YFPTQALNFAFK            | PREDICTED: solute carrier family 25 (mitochondrial carrier, adenine nucleotide translocator), membe | 1446.7456 | 64.34  | 1.455375033 |
| 22094075 | YFPTQALNFAFK            | solute carrier family 25, member 5 [Mus musculus]                                                   | 1446.7456 | 64.34  | 1.455375033 |
| 34328204 | YGEAGDGPWGPPHR          | valyl-tRNA synthetase 2 [Mus musculus]                                                              | 1609.7155 | 44.09  | 0.704370431 |
| 6680193  | YGEYFPGTGDLR            | histone deacetylase 1 [Mus musculus]                                                                | 1374.646  | 38.2   | 0.522730312 |
| 63746482 | YGGDEIPFSPYR            | PREDICTED: filamin, alpha [Mus musculus]                                                            | 1400.6561 | 38.27  | 1.112846447 |
| 63746482 | YGGPYHIGGSPFK           | PREDICTED: filamin, alpha [Mus musculus]                                                            | 1379.6771 | 36.83  | 1.728934809 |
| 6753240  | YGIVDYMIEQSGPPSK        | calcium binding protein, intestinal [Mus musculus]                                                  | 1783.8492 | 35.17  | 0           |
| 21312260 | YGLAAAVFTR              | aldehyde dehydrogenase 1 family, member B1 [Mus musculus]                                           | 1068.5884 | 40.31  | 1.428857563 |
| 31542159 | YGNELPTEEGK             | ATPase, Ca++ transporting, ubiquitous [Mus musculus]                                                | 1333.6177 | 26.86  | 0           |
| 11612505 | YGSQSGQQSVTGVESDDANSYWR | stromal cell-derived factor 2-like 1 [Mus musculus]                                                 | 2579.0962 | 57.28  | 0.72082141  |
| 6755817  | YGVNPGPIVGTTTR          | thymopoietin [Mus musculus]                                                                         | 1330.7103 | 45.46  | 0.967310178 |
| 6680606  | YGVQLSQIQSVISGFQAQLSDVR | keratin complex 1, acidic, gene 19 [Mus musculus]                                                   | 2524.3035 | 108.94 | 1.529518033 |
| 6679687  | YGVSGYPTLK              | glucose regulated protein [Mus musculus]                                                            | 1084.5758 | 61.8   | 0.546630241 |
| 31981246 | YGYTHLSAGELLR           | UMP-CMP kinase [Mus musculus]                                                                       | 1479.7627 | 63.02  | 0.764118632 |
| 40556608 | YHTSQSGDEMTSLSEYVSR     | heat shock protein 1, beta [Mus musculus]                                                           | 2176.9509 | 101.04 | 1.075471081 |
| 34996495 | YHVPVVVPEGSTSDTQEAILR   | ribophorin II [Mus musculus]                                                                        | 2524.3037 | 87.43  | 0.759104166 |
| 19882199 | YIASVQGSAPSPR           | RAN binding protein 2 [Mus musculus]                                                                | 1332.6885 | 22.84  | 1.518013986 |
| 63746482 | YIPVQQGPVGVNVTYGGDHIPK  | PREDICTED: filamin, alpha [Mus musculus]                                                            | 2338.2153 | 59.02  | 1.229681423 |
| 51770896 | YITPDQLADLYK            | PREDICTED: similar to Alpha enolase (2-phospho-D-glycerate hydro-lyase) (Non-neural enolase) (NNE)  | 1439.74   | 64.65  | 0.982986374 |
| 7110683  | YLEDQVNTDLPYEIER        | phosphoenolpyruvate carboxykinase 1, cytosolic [Mus musculus]                                       | 1996.9282 | 32.72  | 1.121685393 |
| 63530525 | YLELLGYR                | PREDICTED: SEC31-like 1 [Mus musculus]                                                              | 1026.5756 | 30.06  | 3.559171398 |
| 20330802 | YLGAEYMQSVGNMR          | transferrin [Mus musculus]                                                                          | 1618.744  | 41.39  | 1.604987963 |
| 6754782  | YLGLENVR                | myosin IB [Mus musculus]                                                                            | 1076.6232 | 24.82  | 1.33418945  |
| 51766008 | YLGLENVR                | PREDICTED: myosin IA [Mus musculus]                                                                 | 1076.6232 | 24.82  | 1.33418945  |
| 6678449  | YLGTPPEPDIVGLDSGHIR     | thiosulfate sulfurtransferase, mitochondrial [Mus musculus]                                         | 2067.0503 | 72.33  | 1.476873561 |
| 33468931 | YLIATSEQPIAALHR         | seryl-aminoacyl-tRNA synthetase 1 [Mus musculus]                                                    | 1682.9238 | 43.53  | 0.911554085 |
| 31560645 | YLLSQSSPAPLTAEEELR      | twinfilin [Mus musculus]                                                                            | 2075.0635 | 62.98  | 1.154972672 |
| 6753254  | YLNQDYETLR              | calpain 2 [Mus musculus]                                                                            | 1314.6327 | 67.02  | 1.431778679 |
| 7305295  | YLPYSEK                 | myosin, heavy polypeptide 11, smooth muscle [Mus musculus]                                          | 1012.5332 | 30.48  | 2.830685024 |
| 22165384 | YLTVAAVFR               | tubulin, beta, 2 [Mus musculus]                                                                     | 1039.6021 | 34.66  | 1.081387915 |
| 31981939 | YLTVAAVFR               | tubulin, beta 4 [Mus musculus]                                                                      | 1039.6021 | 34.66  | 1.081387915 |
| 7106439  | YLTVAAVFR               | tubulin, beta 5 [Mus musculus]                                                                      | 1039.6021 | 34.66  | 1.081387915 |
| 33859506 | YMCENQATISSK            | albumin 1 [Mus musculus]                                                                            | 1374.6031 | 66.67  | 1.699179641 |
| 63660302 | YMIGVTYGGDNIPSPYR       | PREDICTED: filamin B, beta [Mus musculus]                                                           | 2016.0011 | 24.68  | 0.957276891 |
| 6679078  | YMNSGPVAMVWEGLVVVK      | nucleoside-diphosphate kinase 2 [Mus musculus]                                                      | 2093.0581 | 38.49  | 0           |
| 63746482 | YNDQHIPGSPFTAR          | PREDICTED: filamin, alpha [Mus musculus]                                                            | 1602.7729 | 56.7   | 1.507175439 |

|          |                        |                                                                                 |           |       |             |
|----------|------------------------|---------------------------------------------------------------------------------|-----------|-------|-------------|
| 19072792 | YNGDNVIYKPPGR          | thioredoxin domain containing 4 [Mus musculus]                                  | 1492.7587 | 47.14 | 0.526081466 |
| 7949051  | YNILGTNTIMDK           | heterogenous nuclear ribonucleoprotein U [Mus musculus]                         | 1382.6863 | 37.66 | 1.051907876 |
| 31981522 | YNQMDSTEDAQEEFGWK      | transmembrane 9 superfamily member 2 [Mus musculus]                             | 2077.8618 | 45.98 | 0.93465064  |
| 51771420 | YNVLGAETVLTQMR         | PREDICTED: hypothetical protein LOC68693 [Mus musculus]                         | 1594.8296 | 32.7  | 0.871606775 |
| 31543918 | YPEAPPSVR              | ubiquitin-conjugating enzyme E2 variant 2 [Mus musculus]                        | 1015.5249 | 37.9  | 1.065457571 |
| 6671507  | YPIEHGIITNWDDMEK       | actin, alpha 2, smooth muscle, aorta [Mus musculus]                             | 1960.9148 | 47    | 0.790300088 |
| 63471580 | YPQLLSGIR              | PREDICTED: similar to S-adenosylhomocysteine hydrolase [Mus musculus]           | 1046.6093 | 31.24 | 0.951605262 |
| 7549795  | YQEEGPVPQPR            | tight junction protein 2 [Mus musculus]                                         | 1299.6383 | 31.83 | 1.061783408 |
| 27734998 | YQVEYDAYK              | hypothetical protein LOC216821 [Mus musculus]                                   | 1178.5374 | 26.91 | 0           |
| 28173568 | YQYGLNSGRPVTPPR        | protein phosphatase 1, catalytic subunit, beta [Mus musculus]                   | 1761.9059 | 36.83 | 0           |
| 31560697 | YSDMIVAIAEAK           | H1 histone family, member 0 [Mus musculus]                                      | 1438.7262 | 34.57 | 1.201458662 |
| 31982223 | YSEIEPSTEGEVIYR        | laminin, beta 2 [Mus musculus]                                                  | 1771.8391 | 56.99 | 0           |
| 23956406 | YSGGLPLPPSYVPVMSELSDR  | UDP glucuronosyltransferase 2 family, polypeptide B34 [Mus musculus]            | 2363.1885 | 20.51 | 1.450328845 |
| 6679291  | YSLEPVAELK             | phosphoglycerate kinase 1 [Mus musculus]                                        | 1219.6517 | 20.08 | 1.246584759 |
| 63474405 | YSMPDNSPETR            | PREDICTED: tensin [Mus musculus]                                                | 1296.5532 | 39    | 1.169896077 |
| 6677871  | YSTNTQIQVLEGGGETPIFK   | scinderin [Mus musculus]                                                        | 2222.1206 | 52.72 | 0.469569343 |
| 14161694 | YTFDEFSQR              | myosin VIIb [Mus musculus]                                                      | 1192.5372 | 31.22 | 1.205711881 |
| 33469063 | YTINIPEDLKPR           | aconitase 1 [Mus musculus]                                                      | 1458.7772 | 29.69 | 0           |
| 6754084  | YTMGDAPDFDR            | glutathione S-transferase, mu 1 [Mus musculus]                                  | 1287.5366 | 43.37 | 1.208023098 |
| 6671539  | YTPSGQSGAAASESLFISNHAY | aldolase 1, A isoform [Mus musculus]                                            | 2258.0449 | 106.7 | 1.197287754 |
| 6754016  | YTPPEDATPEPGEDPR       | guanine nucleotide binding protein alpha stimulating isoform b [Mus musculus]   | 1774.7804 | 57.95 | 1.203688619 |
| 6680854  | YVDSEGHLYTPIR          | caveolin, caveolae protein 1 [Mus musculus]                                     | 1648.8319 | 65.6  | 1.401819714 |
| 13386062 | YVEEQPGNLQR            | hypothetical protein LOC68117 [Mus musculus]                                    | 1332.6567 | 25.46 | 1.214563157 |
| 31541863 | YVNWIQQTIAAN           | RIKEN cDNA 2210010C04 [Mus musculus]                                            | 1420.703  | 89.61 | 0           |
| 40254244 | YVQELPLETDGALR         | loss of heterozygosity, 11, chromosomal region 2, gene A homolog [Mus musculus] | 1603.8286 | 49.84 | 1.037881326 |
| 13994221 | YVQLPADEVDTQLLQDAAR    | snRNP core protein SMX5 [Mus musculus]                                          | 2145.0867 | 55.68 | 1.459737953 |
| 64427157 | YVVDSDTVQAHTVR         | PREDICTED: synaptopodin 2 [Mus musculus]                                        | 1589.788  | 26.12 | 0           |
| 20270275 | YVVVTGITPTPLGEGK       | methylenetetrahydrofolate dehydrogenase 1 [Mus musculus]                        | 1630.8894 | 23.15 | 0           |
| 21704206 | YWANFAR                | carboxylesterase 2 [Mus musculus]                                               | 927.4597  | 23.8  | 1.385458778 |
| 6678499  | YWQQVIDMNDYQR          | UDP-glucose dehydrogenase [Mus musculus]                                        | 1758.8058 | 37.33 | 2.077992724 |
| 31982290 | YYEPYAAAGPSYGGR        | LIM domain containing preferred translocation partner in lipoma [Mus musculus]  | 1713.761  | 32.44 | 1.335544166 |
| 23943876 | YYIVGLQVR              | zymogen granule membrane protein 16 [Mus musculus]                              | 1110.6337 | 31.57 | 1.186070016 |
| 6755354  | YYPTEDVPR              | ribosomal protein L6 [Mus musculus]                                             | 1139.5404 | 32.04 | 1.07524377  |
| 51873060 | YYVTIIDAPGHR           | eukaryotic translation elongation factor 1 alpha 1 [Mus musculus]               | 1404.7299 | 64.67 | 0.994191215 |

## Mouse Pair 4

| GI #     | Sequence                  | Modifications    | Protein Name                                                                                        | M/z       | Highest Mascot score | Average Ratio (15N:14N), non-Log-transformed |
|----------|---------------------------|------------------|-----------------------------------------------------------------------------------------------------|-----------|----------------------|----------------------------------------------|
| 33859554 | AAAEVNEQYGLDPK            |                  | fumarate hydratase 1 [Mus musculus]                                                                 | 1504.7249 | 90.77                | 0                                            |
| 6678573  | AAATTVQEYLK               |                  | villin 1 [Mus musculus]                                                                             | 1194.6184 | 27.09                | 0                                            |
| 33859506 | AADKDTCFSTEGPNLVTR        |                  | albumin 1 [Mus musculus]                                                                            | 1924.913  | 124.84               | 0.090501587                                  |
| 6756033  | AADPPAENSSAPEAEQGGAE      |                  | nuclease sensitive element binding protein 1 [Mus musculus]                                         | 1897.8046 | 73.36                | 0.671077517                                  |
| 51767712 | AAELLPPAAAWR              |                  | PREDICTED: hypothetical protein LOC70153 [Mus musculus]                                             | 1352.7749 | 25.96                | 0                                            |
| 29789080 | AAESLADPTEYENLFPGLK       |                  | coatomer protein complex, subunit beta 2 (beta prime) [Mus musculus]                                | 2065.0095 | 75.5                 | 0.249621162                                  |
| 31981925 | AAFDDAIAELDTLSEESYK       |                  | tyrosine 3-monooxygenase/tryptophan 5-monooxygenase activation protein, epsilon polypeptide [Mus mu | 2087.9705 | 123.15               | 0                                            |
| 6753036  | AAFQLGSPWR                |                  | aldehyde dehydrogenase 2, mitochondrial [Mus musculus]                                              | 1132.5896 | 33.18                | 0.426706862                                  |
| 6680606  | AALEGTLAETEAR             |                  | keratin complex 1, acidic, gene 19 [Mus musculus]                                                   | 1331.6849 | 82.59                | 0.431512714                                  |
| 29126205 | AANEAGYFNEEMAPIEVK        |                  | acetyl-Coenzyme A acyltransferase 2 (mitochondrial 3-oxoacyl-Coenzyme A thiolase) [Mus musculus]    | 1982.9282 | 48.57                | 0                                            |
| 13385006 | AANNGALPPDLSYIVR          |                  | cytochrome c-1 [Mus musculus]                                                                       | 1670.8848 | 24.08                | 0.38819335                                   |
| 13386120 | AAPEESEQAQEGCSEER         |                  | nucleolar protein family A, member 2 [Mus musculus]                                                 | 1792.7347 | 32.82                | 0.443578897                                  |
| 27754065 | AAPFTLEYR                 |                  | pyrophosphatase [Mus musculus]                                                                      | 1067.5521 | 37.76                | 0.402998164                                  |
| 6677995  | AAQSPQQHSSGDPTEESPV       |                  | solute carrier family 16, member 1 [Mus musculus]                                                   | 2080.9053 | 94.9                 | 0.294853826                                  |
| 8567336  | AASATLPPITVTPVVK          |                  | chloride channel calcium activated 3 [Mus musculus]                                                 | 1678.9681 | 95.95                | 0                                            |
| 63474405 | AASDGGYENQSPPEATSPR       |                  | PREDICTED: tensin [Mus musculus]                                                                    | 1907.8414 | 111.72               | 0.104363297                                  |
| 63474405 | AASDGGYENQSPPEATSPR       | Deamidation (NQ) | PREDICTED: tensin [Mus musculus]                                                                    | 1908.8392 | 49.06                | 0                                            |
| 7304889  | AASGFNATEDAQLR            |                  | annexin A4 [Mus musculus]                                                                           | 1551.7415 | 87.74                | 0.65974391                                   |
| 22550094 | AATIATSEGLWGLDR           |                  | protein kinase, cAMP dependent regulatory, type II alpha [Mus musculus]                             | 1760.9258 | 24.44                | 0.663684161                                  |
| 6678483  | AAVASLLQSVQVPEFTPK        |                  | ubiquitin-activating enzyme E1, Chr X [Mus musculus]                                                | 1885.041  | 86.58                | 0.546272721                                  |
| 7305027  | AAVPSGASTGIYEALELR        |                  | enolase 2, gamma neuronal [Mus musculus]                                                            | 1804.9406 | 99.7                 | 0.596986431                                  |
| 6679651  | AAVPSGASTGIYEALELR        |                  | enolase 3, beta muscle [Mus musculus]                                                               | 1804.9406 | 99.7                 | 0.596986431                                  |
| 51770896 | AAVPSGASTGIYEALELR        |                  | PREDICTED: similar to Alpha enolase (2-phospho-D-glycerate hydro-lyase) (Non-neural enolase) (NNE)  | 1804.9406 | 99.7                 | 0.596986431                                  |
| 27413160 | AAVQQLQAEGLSPR            |                  | carbonyl reductase 3 [Mus musculus]                                                                 | 1467.792  | 36.13                | 0.396566805                                  |
| 50355692 | AAYEAEGLDAR               |                  | lamin A isoform A [Mus musculus]                                                                    | 1165.553  | 78.17                | 0.429918389                                  |
| 22094075 | AAYFGIYDTAK               |                  | solute carrier family 25, member 5 [Mus musculus]                                                   | 1219.6    | 66.45                | 0.257264148                                  |
| 6680045  | ACADATLSQITNNDPVR         |                  | guanine nucleotide-binding protein, beta-1 subunit [Mus musculus]                                   | 1958.9576 | 36.19                | 0.300322433                                  |
| 13937391 | ACGDSTLTQITAGLDPVGR       |                  | guanine nucleotide-binding protein, beta-2 subunit [Mus musculus]                                   | 1874.9296 | 46.26                | 0                                            |
| 46048407 | ACPMLSTLR                 |                  | I-kappa-B-related protein [Mus musculus]                                                            | 991.4923  | 23.61                | 0.4146601849                                 |
| 40538830 | ADDPTYVIVNLR              |                  | core 1 UDP-galactose:N-acetylgalactosamine-alpha-R beta 1,3-galactosyltransferase [Mus musculus]    | 1508.7258 | 30.01                | 0                                            |
| 6671539  | ADDGRPFPPQVIK             |                  | aldolase 1, A isoform [Mus musculus]                                                                | 1342.7145 | 38.27                | 0.513693782                                  |
| 51491845 | ADDPSSYMEVQAAANASGNWEELVK |                  | clathrin, heavy polypeptide (Hc) [Mus musculus]                                                     | 2710.2456 | 60.85                | 0.229909319                                  |
| 6679237  | ADFAQACQDAGVR             |                  | pyruvate carboxylase [Mus musculus]                                                                 | 1351.6101 | 38.66                | 0                                            |
| 34328489 | ADFNTVAIHPTSEELVTLR       |                  | glutathione reductase 1 [Mus musculus]                                                              | 2315.1523 | 112.88               | 0.38001418                                   |
| 6753266  | ADGLAILGVLTK              |                  | carbonic anhydrase 1 [Mus musculus]                                                                 | 1200.7032 | 54.33                | 0                                            |
| 6753266  | ADGLAILGVLTK              | Oxidation (M)    | carbonic anhydrase 1 [Mus musculus]                                                                 | 1216.6938 | 37.03                | 0.927346937                                  |
| 31981522 | ADIELFVNR                 |                  | transmembrane 9 superfamily member 2 [Mus musculus]                                                 | 1076.5752 | 52.44                | 0.371403717                                  |
| 6754084  | ADIVENQVMDTR              |                  | glutathione S-transferase, mu 1 [Mus musculus]                                                      | 1390.6674 | 66.16                | 0                                            |
| 23956406 | ADIWLIR                   |                  | UDP glucuronosyltransferase 2 family, polypeptide B34 [Mus musculus]                                | 886.5213  | 23.46                | 0.205741287                                  |
| 55742711 | ADMVETQQLMR               |                  | EH-domain containing 2 [Mus musculus]                                                               | 1321.6232 | 31.16                | 1.73122652                                   |
| 33859811 | ADMVIEAVFEDLGVK           |                  | hydroxyacyl-Coenzyme A dehydrogenase/3-ketoacyl-Coenzyme A thiolase/enoyl-Coenzyme A hydratase (tri | 1635.8275 | 77.56                | 0.70384144                                   |
| 33859811 | ADMVIEAVFEDLGVK           | Oxidation (M)    | hydroxyacyl-Coenzyme A dehydrogenase/3-ketoacyl-Coenzyme A thiolase/enoyl-Coenzyme A hydratase (tri | 1651.8109 | 39.67                | 0.156223434                                  |
| 6680201  | ADNEKLEEQPGEQAPR          |                  | hepatoma-derived growth factor-related protein 2 [Mus musculus]                                     | 1810.8629 | 24.74                | 0.422073856                                  |
| 7709986  | ADPEAAWPEAEAR             |                  | ubiquitin-like 1 (sentrin) activating enzyme E1B [Mus musculus]                                     | 1642.7499 | 35.34                | 0.346359644                                  |
| 6753498  | ADWSSLSR                  |                  | cytochrome c oxidase subunit IV isoform 1 [Mus musculus]                                            | 921.4437  | 35.56                | 0.223477809                                  |
| 31560731 | ADYAQLLEDQMNAFR           |                  | ATPase, H+ transporting, V1 subunit A, isoform 1 [Mus musculus]                                     | 1784.8369 | 40.81                | 0                                            |
| 32189330 | AEAAAPYTVLAQSAPR          |                  | latent transforming growth factor beta binding protein 4 [Mus musculus]                             | 1615.8412 | 33.63                | 2.75795006                                   |
| 63562743 | AEACVFWR                  |                  | PREDICTED: similar to secreted gel-forming mucin [Mus musculus]                                     | 981.4619  | 40.81                | 0.202167477                                  |
| 6679237  | AEAEAQAELSFPFR            |                  | pyruvate carboxylase [Mus musculus]                                                                 | 1547.7375 | 63.36                | 0.584811565                                  |
| 13624315 | AEAETMYQIK                | Oxidation (M)    | keratin complex 2, basic, gene 8 [Mus musculus]                                                     | 1199.5608 | 53.35                | 0.337741587                                  |
| 63565108 | AEAETMYQIK                | Oxidation (M)    | PREDICTED: similar to cytokeratin EndoA - mouse [Mus musculus]                                      | 1199.5608 | 53.35                | 0.337741587                                  |
| 13399310 | AEAGAGSATEFQFR            |                  | ribosomal protein S10 [Mus musculus]                                                                | 1441.675  | 64.21                | 0.450987742                                  |
| 27370092 | AEAGDNLGALVR              |                  | Tu translation elongation factor, mitochondrial [Mus musculus]                                      | 1185.6218 | 46.86                | 0.449432584                                  |
| 6996913  | AEDGSVIDYELIDQDAR         |                  | annexin A2 [Mus musculus]                                                                           | 1908.8826 | 127.56               | 0.520032481                                  |



|          |                               |                  |                                                                                                     |           |        |             |
|----------|-------------------------------|------------------|-----------------------------------------------------------------------------------------------------|-----------|--------|-------------|
| 7242171  | AEDNADTLALVFEAPNQEK           |                  | proliferating cell nuclear antigen [Mus musculus]                                                   | 2074.9917 | 55.11  | 0           |
| 21312266 | AEELFLWVPR                    |                  | hypothetical protein LOC52690 [Mus musculus]                                                        | 1259.6783 | 24.69  | 1.615091191 |
| 29336026 | AEELLAQLGR                    |                  | nonmuscle myosin heavy chain [Mus musculus]                                                         | 1099.6091 | 43.16  | 0.377962654 |
| 33636693 | AEEPPGQAAYETPR                |                  | pleckstrin homology domain containing, family A member 6 [Mus musculus]                             | 1404.6415 | 34.86  | 0.43184522  |
| 31982030 | AEYEFLLPMEEAPK                |                  | Rho GDP dissociation inhibitor (GDI) alpha [Mus musculus]                                           | 1783.8405 | 46.33  | 0           |
| 21703832 | AEFGPPGPGPGSR                 |                  | arginyl aminopeptidase (aminopeptidase B) [Mus musculus]                                            | 1225.6012 | 26.09  | 0.368140565 |
| 31981562 | AEGSDVANAVLDGADCIMLSGETAK     |                  | pyruvate kinase 3 [Mus musculus]                                                                    | 2437.1323 | 129.45 | 0           |
| 31981562 | AEGSDVANAVLDGADCIMLSGETAK     | Oxidation (M)    | pyruvate kinase 3 [Mus musculus]                                                                    | 2453.1287 | 67.58  | 4.044998903 |
| 37537522 | AEIINQDLFEQLER                |                  | epiplakin 1 [Mus musculus]                                                                          | 1717.879  | 25.53  | 0           |
| 27229048 | AEISNAIDQYVVTGIGEGEDLVK       |                  | 5-aminoimidazole-4-carboxamide ribonucleotide formyltransferase/IMP cyclohydrolase [Mus musculus]   | 2422.2041 | 65.81  | 0.71175134  |
| 6678573  | AELGNSGDWSQIADEVMSPK          |                  | villin 1 [Mus musculus]                                                                             | 2133.99   | 79.23  | 0.418867189 |
| 6678573  | AELGNSGDWSQIADEVMSPK          | Oxidation (M)    | villin 1 [Mus musculus]                                                                             | 2149.9883 | 36.45  | 2.513790029 |
| 6755372  | AELNEFLTR                     |                  | ribosomal protein S3 [Mus musculus]                                                                 | 1092.5675 | 38.97  | 0.416591315 |
| 13386054 | AENFFILR                      |                  | actin related protein 2/3 complex, subunit 4 [Mus musculus]                                         | 1009.5514 | 44.36  | 0.429379677 |
| 6678483  | AENYDISPADR                   |                  | ubiquitin-activating enzyme E1, Chr X [Mus musculus]                                                | 1250.5674 | 53.08  | 0.40617905  |
| 7305583  | AEQLASLEAAQR                  |                  | tight junction protein 3 [Mus musculus]                                                             | 1286.6604 | 27.6   | 0           |
| 20149726 | AETAPLPTSVDDTPEVLNR           |                  | phosphatidate cytidyltransferase 2 [Mus musculus]                                                   | 2025.017  | 64.28  | 0.339421302 |
| 14149645 | AETSESSGSAPAVPEASAPK          |                  | methyl CpG binding protein 2 [Mus musculus]                                                         | 1959.9225 | 25.39  | 0           |
| 13626040 | AEVGQEGEAGQFDGEK              |                  | A kinase (PRKA) anchor protein (gravin) 12 [Mus musculus]                                           | 1650.7324 | 78.42  | 0.284590032 |
| 63746482 | AEVGVPAEFGIWR                 |                  | PREDICTED: filamin, alpha [Mus musculus]                                                            | 1531.797  | 76.26  | 0.220445757 |
| 6753322  | AFADAMEVIPSTLAENAGLNPISTVTELR |                  | chaperonin subunit 4 (delta) [Mus musculus]                                                         | 3030.5417 | 35.76  | 0.288447299 |
| 13385310 | AFDNDVDALCNLR                 |                  | propionyl Coenzyme A carboxylase, beta polypeptide [Mus musculus]                                   | 1465.6837 | 47.97  | 0           |
| 29293809 | AFDSGIIIMEFVNK                |                  | ATP citrate lyase [Mus musculus]                                                                    | 1567.776  | 40.57  | 0           |
| 21312444 | AFDVPIEEGPVFR                 |                  | hypothetical protein LOC69824 [Mus musculus]                                                        | 1475.754  | 38.84  | 0           |
| 6755100  | AFFSEVER                      |                  | proliferation-associated 2G4 [Mus musculus]                                                         | 984.4827  | 37.5   | 0.462297906 |
| 41054974 | AFGAPNVVEIDQYLSK              |                  | nuclear protein localization 4 [Mus musculus]                                                       | 1994.9753 | 39.37  | 0           |
| 63746482 | AFGPGQLGGNAGSPAR              |                  | PREDICTED: filamin, alpha [Mus musculus]                                                            | 1456.7373 | 104.07 | 0.097448723 |
| 63746482 | AFGPGQLGGNAGSPAR              | Deamidation (NQ) | PREDICTED: filamin, alpha [Mus musculus]                                                            | 1457.7269 | 36.61  | 0           |
| 8567402  | AFGYGPLR                      |                  | splicing factor, arginine/serine-rich 3 (SRp20) [Mus musculus]                                      | 1043.5316 | 33.33  | 0.49923374  |
| 13384888 | AFIFPQESSTAYVSLIPK            |                  | hypothetical protein LOC66289 [Mus musculus]                                                        | 1998.0665 | 101.88 | 0           |
| 7710086  | AFLTLAEDILR                   |                  | RAB10, member RAS oncogene family [Mus musculus]                                                    | 1261.7179 | 55.71  | 0.528607679 |
| 51491845 | AFMTADLPNELIELLEK             | Oxidation (M)    | clathrin, heavy polypeptide (Hc) [Mus musculus]                                                     | 1963.0074 | 29.84  | 1.206293668 |
| 37674269 | AFQEQQGQEQSEPGMSSTPR          |                  | slingshot-like 3 [Mus musculus]                                                                     | 2278.9939 | 49.67  | 0           |
| 6755781  | AFSGLTQNPESIELR               |                  | thrombospondin 4 [Mus musculus]                                                                     | 1661.847  | 35     | 0           |
| 13937355 | AFSGYLGPDSEK                  |                  | esterase D/formylglutathione hydrolase [Mus musculus]                                               | 1270.5964 | 52.67  | 0.87238977  |
| 8394252  | AFSPTTVNTGR                   |                  | Sec61 alpha subunit homolog [Mus musculus]                                                          | 1150.589  | 34.72  | 0.493939342 |
| 31543847 | AFSSPQEEEEAGFTGR              |                  | transcription elongation factor B (SIII), polypeptide 3 [Mus musculus]                              | 1741.7927 | 28.15  | 0.384417243 |
| 31982186 | AGAGSATLSMAYAGAR              |                  | malate dehydrogenase 2, NAD (mitochondrial) [Mus musculus]                                          | 1454.7079 | 73.38  | 0.838100017 |
| 28916677 | AGAYDFSPPEWDTVTPEAK           |                  | calcium/calmodulin-dependent protein kinase II alpha [Mus musculus]                                 | 2080.9651 | 49.72  | 0           |
| 20806532 | AGEAPTENPAPATEQSSAE           |                  | cold shock domain protein A short isoform [Mus musculus]                                            | 1856.8226 | 41.46  | 0           |
| 6755368  | AGELTEDEVER                   |                  | ribosomal protein S18 [Mus musculus]                                                                | 1247.5793 | 35.55  | 0.567515708 |
| 6677935  | AGEQDPVPTPAELTSPGR            |                  | sorbin and SH3 domain containing 1 [Mus musculus]                                                   | 1821.8878 | 29.14  | 0           |
| 31543942 | AGEVINQPMMAAR                 |                  | vinculin [Mus musculus]                                                                             | 1518.726  | 23.1   | 0           |
| 6671507  | AGFAGDDAPR                    |                  | actin, alpha 2, smooth muscle, aorta [Mus musculus]                                                 | 976.4518  | 64.92  | 0.173678916 |
| 6671509  | AGFAGDDAPR                    |                  | actin, beta, cytoplasmic [Mus musculus]                                                             | 976.4518  | 64.92  | 0.173678916 |
| 31982275 | AGGIETIANEYSDR                |                  | heat shock protein 4 [Mus musculus]                                                                 | 1495.7041 | 34.43  | 0.56782     |
| 7242197  | AGGSASAMLQPLLDNQVGFK          |                  | proteasome (prosome, macropain) subunit, beta type 1 [Mus musculus]                                 | 2004.0184 | 28.57  | 0           |
| 33859811 | AGLEQGS DAGYLAESQK            |                  | hydroxyacyl-Coenzyme A dehydrogenase/3-ketoacyl-Coenzyme A thiolase/enoyl-Coenzyme A hydratase (tri | 1723.8096 | 123.9  | 0.244824787 |
| 19527018 | AGLLALEFYTPEANWR              |                  | dipeptidylpeptidase III [Mus musculus]                                                              | 1921.9774 | 39.98  | 0.340638183 |
| 20799907 | AGLQFPVGR                     |                  | histone 2, H2aa1 [Mus musculus]                                                                     | 944.5416  | 52.66  | 0.539299017 |
| 63562740 | AGLSLMWNR                     |                  | PREDICTED: similar to secreted gel-forming mucin [Mus musculus]                                     | 1047.5413 | 45.16  | 0           |
| 6677775  | AGNLGGGVVTIER                 |                  | ribosomal protein L22 [Mus musculus]                                                                | 1242.6802 | 72.98  | 0.567760792 |
| 31982223 | AGNSLAASTAETAGSAQSR           |                  | laminin, beta 2 [Mus musculus]                                                                      | 1878.8816 | 35.36  | 0.067710591 |
| 6677871  | AGQQAGLQVWR                   |                  | scinderin [Mus musculus]                                                                            | 1213.6481 | 30.06  | 0           |
| 41322904 | AGTLSITEFADMLSGNAGGFR         |                  | plectin 1 isoform 1 [Mus musculus]                                                                  | 2115.021  | 84.46  | 0.336472079 |
| 11230802 | AGTQIENIEDFR                  |                  | actinin alpha 4 [Mus musculus]                                                                      | 1507.7042 | 65.78  | 0.320594313 |
| 59709449 | AGTQIENIEDFR                  |                  | actinin alpha 2 [Mus musculus]                                                                      | 1521.7203 | 46.73  | 0.280602223 |
| 16716499 | AGVATPGLTQDLWR                |                  | sideroflexin 3 [Mus musculus]                                                                       | 1613.8311 | 47.84  | 0.990891083 |
| 41322904 | AGVGAPVTQVTLQSTQR             |                  | plectin 1 isoform 1 [Mus musculus]                                                                  | 1712.931  | 69.97  | 0.63366232  |
| 41152517 | AGVIFPVGR                     |                  | H2A histone family, member Y [Mus musculus]                                                         | 915.5458  | 22.71  | 0           |

|          |                          |                                                                                                     |           |        |             |
|----------|--------------------------|-----------------------------------------------------------------------------------------------------|-----------|--------|-------------|
| 51770896 | AGYTDQVIGMDVAASEFYR      | PREDICTED: similar to Alpha enolase (2-phospho-D-glycerate hydro-lyase) (Non-neural enolase) (NNE)  | 2192.0371 | 47.36  | 0.671302239 |
| 31980648 | AIAELGIYPAVDPLDSTR       | ATP synthase, H+ transporting mitochondrial F1 complex, beta subunit [Mus musculus]                 | 1988.0369 | 111.67 | 0.341851367 |
| 39652626 | AIAGIINQPYNYQAGPDAALGR   | bisphosphate 3'-nucleotidase 1 [Mus musculus]                                                       | 2436.2502 | 58.14  | 3.282558961 |
| 30023842 | AIANEQANFISIK            | valosin containing protein [Mus musculus]                                                           | 1521.7668 | 50.66  | 5.957598942 |
| 6755004  | AIASATEGGSPVQIR          | programmed cell death 8 [Mus musculus]                                                              | 1456.7758 | 57.45  | 0.292979187 |
| 6671559  | AIEQADLLQEEDESPR         | adaptor protein complex AP-1, sigma 1 [Mus musculus]                                                | 1842.8741 | 68.8   | 0.456962537 |
| 6678912  | AIFASGSPFDPVTLPDGR       | malic enzyme, supernatant [Mus musculus]                                                            | 1846.9301 | 31.62  | 0           |
| 31560653 | AIGVLTSGGDAQGMNAAVR      | phosphofructokinase, liver, B-type [Mus musculus]                                                   | 1787.9097 | 76.87  | 0.480075122 |
| 9790051  | AIGVLTSGGDAQGMNAAVR      | phosphofructokinase, platelet [Mus musculus]                                                        | 1787.9097 | 76.87  | 0.480075122 |
| 6755376  | AIIIFVPVPLK              | ribosomal protein S7 [Mus musculus]                                                                 | 1337.8523 | 27.76  | 0.447194639 |
| 33859488 | AILVDLEPGTMDSVR          | tubulin, beta 2 [Mus musculus]                                                                      | 1615.8352 | 51.6   | 0.837520328 |
| 12963615 | AILVDLEPGTMDSVR          | tubulin, beta 3 [Mus musculus]                                                                      | 1615.8352 | 51.6   | 0.837520328 |
| 7106439  | AILVDLEPGTMDSVR          | tubulin, beta 5 [Mus musculus]                                                                      | 1615.8352 | 51.6   | 0.837520328 |
| 21746161 | AILVDLEPGTMDSVR          | tubulin, beta [Mus musculus]                                                                        | 1615.8352 | 51.6   | 0.837520328 |
| 6755198  | AINQGGLTSVAVR            | proteasome (prosome, macropain) subunit, alpha type 6 [Mus musculus]                                | 1285.725  | 61.24  | 0.375842612 |
| 31543942 | AIPDLTAPVAAVQAAVSNLVR    | vinculin [Mus musculus]                                                                             | 2076.1812 | 42.92  | 0.191681103 |
| 6753864  | AIVAGDQNVEYK             | four and a half LIM domains 1 [Mus musculus]                                                        | 1306.6611 | 79.25  | 0.110912874 |
| 31560560 | AIVAIENPADVSVISSR        | laminin receptor 1 (ribosomal protein SA) [Mus musculus]                                            | 1740.949  | 89.11  | 0.290489909 |
| 63514363 | AIVAIENPADVSVISSR        | PREDICTED: similar to 67 kda laminin receptor [Mus musculus]                                        | 1740.949  | 89.11  | 0.290489909 |
| 31980762 | AIWNVINWENVTER           | superoxide dismutase 2, mitochondrial [Mus musculus]                                                | 1743.8818 | 46.08  | 0.301439837 |
| 9845257  | ALAAAGYDVEK              | histone 1, H1c [Mus musculus]                                                                       | 1107.568  | 87.29  | 0.456571884 |
| 34328365 | ALAAAGYDVEK              | histone 1, H1d [Mus musculus]                                                                       | 1107.568  | 87.29  | 0.456571884 |
| 13430890 | ALAAAGYDVEK              | histone 1, H1e [Mus musculus]                                                                       | 1107.568  | 87.29  | 0.456571884 |
| 21426893 | ALAAAGYDVEK              | histone 1, H1b [Mus musculus]                                                                       | 1093.5502 | 67.32  | 0.441691747 |
| 13386370 | ALAIYESQLGPDNPNVAR       | kinesin-like 8 [Mus musculus]                                                                       | 1927.9941 | 34.81  | 0           |
| 6755809  | ALDGFTEENR               | talin 1 [Mus musculus]                                                                              | 1266.5751 | 50.42  | 0           |
| 7709980  | ALDIAENEMGLMR            | S-adenosylhomocysteine hydrolase [Mus musculus]                                                     | 1559.7595 | 51.13  | 0.721211294 |
| 58037267 | ALDLFSDNAPPPELLEINEDIAK  | protein disulfide isomerase-associated 6 [Mus musculus]                                             | 2637.3762 | 60.34  | 0.935224543 |
| 9789873  | ALDQASEEINWDFR           | methionine aminopeptidase 2 [Mus musculus]                                                          | 1693.7886 | 25.32  | 0           |
| 31981983 | ALDTVLFGPPLLTR           | stromal interaction molecule 1 [Mus musculus]                                                       | 1512.8782 | 52.18  | 0.236900646 |
| 7305295  | ALEEALAKEELER            | myosin, heavy polypeptide 11, smooth muscle [Mus musculus]                                          | 1629.8269 | 22.68  | 8.212616114 |
| 33598964 | ALELDPNLYR               | myosin heavy chain 10, non-muscle [Mus musculus]                                                    | 1203.6422 | 43.45  | 0.082088408 |
| 7305295  | ALELDPNLYR               | myosin, heavy polypeptide 11, smooth muscle [Mus musculus]                                          | 1203.6422 | 43.45  | 0.082088408 |
| 20137006 | ALELDSNLYR               | myosin, heavy polypeptide 9, non-muscle [Mus musculus]                                              | 1193.6178 | 54.46  | 0.378312483 |
| 23956212 | ALEPEEGNPQTEAQENGP       | HIV TAT specific factor 1 [Mus musculus]                                                            | 2194.9922 | 116.2  | 0.440530115 |
| 6680606  | ALEQANGELEVK             | keratin complex 1, acidic, gene 19 [Mus musculus]                                                   | 1300.6714 | 97.29  | 0.384053311 |
| 6679687  | ALEQLQEYFDGNLK           | glucose regulated protein [Mus musculus]                                                            | 1814.8936 | 42.74  | 0.358137217 |
| 20137006 | ALEQQVEEMK               | myosin, heavy polypeptide 9, non-muscle [Mus musculus]                                              | 1204.5828 | 27.73  | 0           |
| 9790083  | ALESSIAPIVIFASNR         | RuvB-like protein 1 [Mus musculus]                                                                  | 1687.9352 | 24.22  | 0.682754943 |
| 7305295  | ALETQMEEMK               | myosin, heavy polypeptide 11, smooth muscle [Mus musculus]                                          | 1209.5492 | 52.52  | 0           |
| 7305295  | ALETQMEEMK               | myosin, heavy polypeptide 11, smooth muscle [Mus musculus]                                          | 1225.5471 | 37.83  | 0           |
| 6678573  | ALGMTPAAFSALPR           | villin 1 [Mus musculus]                                                                             | 1402.7494 | 26.07  | 0.707586009 |
| 13385942 | ALGVLAQLIWSR             | citrate synthase [Mus musculus]                                                                     | 1326.792  | 32.36  | 0.335922478 |
| 27754099 | ALIAAQYSGAQVR            | eukaryotic translation elongation factor 1 gamma [Mus musculus]                                     | 1347.7416 | 66.26  | 0.525238726 |
| 63489754 | ALINADELANDVAGAEALLDR    | PREDICTED: similar to Spectrin alpha chain, brain (Spectrin, non-erythroid alpha chain) (Alpha-II s | 2154.1057 | 103.93 | 0           |
| 6671666  | ALLATASQCQQPAGNK         | CAP, adenylate cyclase-associated protein 1 [Mus musculus]                                          | 1600.8113 | 78.67  | 0           |
| 42734399 | ALLEGESNPEILIWTEINVPQEPR | desmuslin isoform H [Mus musculus]                                                                  | 2990.5056 | 50.59  | 0           |
| 46559834 | ALLEGESNPEILIWTEINVPQEPR | desmuslin isoform M [Mus musculus]                                                                  | 2990.5056 | 50.59  | 0           |
| 33859482 | ALLELQLEPEELYQTFQR       | eukaryotic translation elongation factor 2 [Mus musculus]                                           | 2220.1587 | 64.19  | 0.591405047 |
| 40556608 | ALLFIPR                  | heat shock protein 1, beta [Mus musculus]                                                           | 829.5311  | 32.93  | 0.481373761 |
| 34328489 | ALLTPVAIAAGR             | glutathione reductase 1 [Mus musculus]                                                              | 1152.7051 | 40.35  | 0.669485951 |
| 8567338  | ALNAGYILNGLTVSIPGLEK     | coatamer protein complex, subunit gamma [Mus musculus]                                              | 2043.1394 | 48.41  | 0           |
| 63476037 | ALNLGYALDYALR            | PREDICTED: procollagen, type VI, alpha 3 [Mus musculus]                                             | 1452.7881 | 75.02  | 0.19669916  |
| 34328204 | ALNPLEDWLR               | valyl-tRNA synthetase 2 [Mus musculus]                                                              | 1226.6549 | 42.78  | 0.377337873 |
| 63506192 | ALPFWNEEIVPQIK           | PREDICTED: similar to phosphoglycerate mutase (EC 5.4.2.1) B chain - rat [Mus musculus]             | 1683.9067 | 30.62  | 0.535168594 |
| 21704020 | ALSEIAGITLPHYDLDQVR      | NADH dehydrogenase (ubiquinone) Fe-S protein 1 [Mus musculus]                                       | 2075.1016 | 93.83  | 0.255161655 |
| 33859650 | ALTLGALTLPLAR            | membrane bound C2 domain containing protein [Mus musculus]                                          | 1309.8246 | 27.02  | 0           |
| 6754750  | ALTSELANAR               | moesin [Mus musculus]                                                                               | 1045.5646 | 33.02  | 0           |
| 21703972 | ALTTQLTDAELAQGR          | malic enzyme 2, NAD(+)-dependent, mitochondrial [Mus musculus]                                      | 1587.8334 | 75.15  | 0.295530255 |
| 22165384 | ALTVPELTQQMFDAK          | tubulin, beta, 2 [Mus musculus]                                                                     | 1691.8616 | 66.81  | 0.767827555 |

Oxidation (M)

|          |                                        |                  |                                                                                                     |           |        |             |
|----------|----------------------------------------|------------------|-----------------------------------------------------------------------------------------------------|-----------|--------|-------------|
| 12963615 | ALTVPELTQQMFDAK                        |                  | tubulin, beta 3 [Mus musculus]                                                                      | 1691.8616 | 66.81  | 0.767827555 |
| 31981939 | ALTVPELTQQMFDAK                        |                  | tubulin, beta 4 [Mus musculus]                                                                      | 1691.8616 | 66.81  | 0.767827555 |
| 27754056 | ALTVPELTQQMFDAK                        |                  | tubulin, beta 6 [Mus musculus]                                                                      | 1691.8616 | 66.81  | 0.767827555 |
| 33859488 | ALTVPELTQQMFDSK                        |                  | tubulin, beta 2 [Mus musculus]                                                                      | 1707.8414 | 43.74  | 0           |
| 21746161 | ALTVPELTQQMFDSK                        |                  | tubulin, beta [Mus musculus]                                                                        | 1707.8414 | 43.74  | 0           |
| 7106439  | ALTVPELTQQVFDK                         |                  | tubulin, beta 5 [Mus musculus]                                                                      | 1659.8961 | 45.06  | 0.466764416 |
| 9903607  | ALVDELEWEIAR                           |                  | transmembrane protein 4 [Mus musculus]                                                              | 1443.7534 | 41.92  | 0.956493942 |
| 31980953 | ALVVTVDPVPLGNR                         |                  | hydroxyacid oxidase (glycolate oxidase) 3 [Mus musculus]                                            | 1423.8284 | 45.6   | 0.210013135 |
| 31560656 | ALYDTFSAFGNILSCK                       |                  | poly A binding protein, cytoplasmic 1 [Mus musculus]                                                | 1749.8579 | 48.11  | 0.521086894 |
| 63622083 | ALYDTFSAFGNILSCK                       |                  | PREDICTED: similar to Poly(A) binding protein, cytoplasmic 4, isoform 1 [Mus musculus]              | 1749.8579 | 48.11  | 0.521086894 |
| 6754556  | ALYETELADAR                            |                  | lamin B1 [Mus musculus]                                                                             | 1251.626  | 55.28  | 0.581493374 |
| 19526818 | ALYSNILGEENTYLWR                       |                  | solute carrier family 25 (mitochondrial carrier, phosphate carrier), member 3 [Mus musculus]        | 1941.9779 | 85.39  | 0.32381474  |
| 31981983 | AMAEEDNGSIEETDSSPGR                    |                  | stromal interaction molecule 1 [Mus musculus]                                                       | 2051.8535 | 83.72  | 0.311504127 |
| 21704100 | AMDSDFWFAQNYMGR                        |                  | hydroxyacyl-Coenzyme A dehydrogenase/3-ketoacyl-Coenzyme A thiolase/enoyl-Coenzyme A hydratase (tri | 1691.7009 | 71.83  | 0           |
| 47059123 | AMEIAEALGR                             |                  | UDP glucuronosyltransferase 1 family, polypeptide A10 [Mus musculus]                                | 1060.551  | 32.35  | 0           |
| 6679503  | AMEVDERPTEQYSDIGGLDK                   |                  | proteasome (prosome, macropain) 26S subunit, ATPase 3 [Mus musculus]                                | 2253.0432 | 31.18  | 0.414671591 |
| 20874851 | AMGIMNSFVNDIFER                        |                  | PREDICTED: similar to histone H2b-616 [Mus musculus]                                                | 1743.8416 | 79.37  | 0           |
| 20874851 | AMGIMNSFVNDIFER                        | 2 Oxidation (M)  | PREDICTED: similar to histone H2b-616 [Mus musculus]                                                | 1775.7904 | 27.54  | 0           |
| 20874851 | AMGIMNSFVNDIFER                        | Deamidation (NQ) | PREDICTED: similar to histone H2b-616 [Mus musculus]                                                | 1744.8098 | 75.77  | 0           |
| 20874851 | AMGIMNSFVNDIFER                        | Oxidation (M)    | PREDICTED: similar to histone H2b-616 [Mus musculus]                                                | 1759.8182 | 35.32  | 0           |
| 41054806 | AMGNLQIDFADPQR                         |                  | guanine nucleotide binding protein, alpha inhibiting 2 [Mus musculus]                               | 1575.7648 | 36.14  | 0           |
| 63704790 | AMSLVSGEGEGEONEIR                      |                  | PREDICTED: inositol 1,4,5-triphosphate receptor 3 [Mus musculus]                                    | 1805.8424 | 26.63  | 0.560075925 |
| 8567336  | AMYIDGWIEDGEVR                         |                  | chloride channel calcium activated 3 [Mus musculus]                                                 | 1653.7693 | 30.44  | 0           |
| 8567336  | AMYIDGWIEDGEVR                         | Oxidation (M)    | chloride channel calcium activated 3 [Mus musculus]                                                 | 1669.7777 | 34.07  | 0           |
| 27532959 | ANATEFGLASGVFTR                        |                  | aldehyde dehydrogenase 1 family, member L1 [Mus musculus]                                           | 1540.7804 | 45.17  | 0.329016443 |
| 9910128  | ANDTTFGLAAGVFTR                        |                  | aldehyde dehydrogenase 9, subfamily A1 [Mus musculus]                                               | 1540.7798 | 54.94  | 0           |
| 42734351 | ANEFIFLELNSSISQR                       | Deamidation (NQ) | SUMO1/sentrin specific protease 7 isoform 1 [Mus musculus]                                          | 1868.9291 | 24.43  | 0           |
| 31981549 | ANIIFNTALGTIFGVK                       |                  | sulfide quinone reductase-like [Mus musculus]                                                       | 1678.928  | 70.07  | 0.472060075 |
| 38372905 | ANINVENAFFTLAR                         |                  | cell line NK14 derived transforming oncogene [Mus musculus]                                         | 1579.8225 | 59.76  | 0.820362483 |
| 63746482 | ANLPQSFQVDTSK                          |                  | PREDICTED: filamin, alpha [Mus musculus]                                                            | 1434.7175 | 79.59  | 0.116947303 |
| 20137006 | ANLQIDQINTDLNLER                       |                  | myosin, heavy polypeptide 9, non-muscle [Mus musculus]                                              | 1869.9603 | 68.24  | 0.286354986 |
| 21313526 | ANTNPVPCGLTAR                          |                  | hypothetical protein LOC78906 [Mus musculus]                                                        | 1313.6589 | 23.09  | 0           |
| 6680618  | ANWYFLLAR                              |                  | acetyl-Coenzyme A dehydrogenase, medium chain [Mus musculus]                                        | 1153.6216 | 35.56  | 0           |
| 6755895  | APAQAPEATPTYETGQR                      |                  | tuberous sclerosis 2 [Mus musculus]                                                                 | 1787.8584 | 32.57  | 0.793021419 |
| 19745150 | APDAWDYSQGFVNEEMIR                     |                  | diaphorase 1 [Mus musculus]                                                                         | 2127.9465 | 44.43  | 0.398334313 |
| 6754750  | APDFVYAPR                              |                  | moesin [Mus musculus]                                                                               | 1182.5963 | 59.16  | 0.484733745 |
| 6677699  | APDFVYAPR                              |                  | radixin [Mus musculus]                                                                              | 1182.5963 | 59.16  | 0.484733745 |
| 6678571  | APDFVYAPR                              |                  | villin 2 [Mus musculus]                                                                             | 1182.5963 | 59.16  | 0.484733745 |
| 39204553 | APEPPPQQAQQQ                           |                  | chromodomain helicase DNA binding protein 4 [Mus musculus]                                          | 1417.7104 | 70.14  | 0.498102938 |
| 63738313 | APEVDVQGPWEWSLK                        |                  | PREDICTED: similar to AHNAK [Mus musculus]                                                          | 1554.7797 | 28.63  | 0           |
| 21313640 | APEVSQYIYQVYDSILK                      |                  | adaptor-related protein complex 2, beta 1 subunit [Mus musculus]                                    | 2016.0332 | 34.04  | 1.660042598 |
| 6681157  | APILIATDVASR                           |                  | DEAD (Asp-Glu-Ala-Asp) box polypeptide 5 [Mus musculus]                                             | 1226.7085 | 52.47  | 0.771354945 |
| 40068493 | APILIATDVASR                           |                  | DEAD box polypeptide 17 isoform 1 [Mus musculus]                                                    | 1226.7085 | 52.47  | 0.771354945 |
| 63540743 | APLQVAVLGPTGVAEPVEVR                   |                  | PREDICTED: filamin C, gamma [Mus musculus]                                                          | 2002.1323 | 82.49  | 0.682065414 |
| 31560689 | APLVLEQGLR                             |                  | 3-hydroxy-3-methylglutaryl-Coenzyme A synthase 2 [Mus musculus]                                     | 1095.6509 | 52.19  | 0.321454051 |
| 6996911  | APNSPDVLEIEFK                          |                  | argininosuccinate synthetase [Mus musculus]                                                         | 1458.7468 | 45.5   | 0.353058175 |
| 33859506 | APQVSTPLVEAAR                          |                  | albumin 1 [Mus musculus]                                                                            | 1439.7861 | 93.81  | 0.083130806 |
| 31981826 | APSSSVGISEWLDQK                        |                  | electron transferring flavoprotein, alpha polypeptide [Mus musculus]                                | 1690.8301 | 83.19  | 0           |
| 33563250 | APSYGAGELLDLDFSLADAVNQEFLATR           |                  | desmin [Mus musculus]                                                                               | 2755.3621 | 111.41 | 0.097192688 |
| 7106435  | APTAQVESFR                             |                  | tenascin C [Mus musculus]                                                                           | 1105.5629 | 40.29  | 0           |
| 13384888 | APTNLDPAR                              |                  | hypothetical protein LOC66289 [Mus musculus]                                                        | 1051.5559 | 45.66  | 0           |
| 6671664  | APVPTGEVYFADSFDR                       |                  | calnexin [Mus musculus]                                                                             | 1770.835  | 77.98  | 0.379033428 |
| 31981647 | APWELLELR                              |                  | tyrosyl-tRNA synthetase [Mus musculus]                                                              | 1126.6279 | 34.85  | 0.285739088 |
| 6679515  | AQAALQAVNSVQSGNLLAASAAVVDAGMAMAGQSPVLR |                  | polypyrimidine tract binding protein 1 [Mus musculus]                                               | 3680.844  | 24.26  | 0.371779994 |
| 41322904 | AQAEAQPPVFNTLR                         |                  | plectin 1 isoform 1 [Mus musculus]                                                                  | 1572.8121 | 45.14  | 0.846552535 |
| 41322904 | AQAELEAQELQR                           |                  | plectin 1 isoform 1 [Mus musculus]                                                                  | 1385.7037 | 49.87  | 0.694547553 |
| 18079351 | AQALAIETAEALER                         |                  | major vault protein [Mus musculus]                                                                  | 1543.7844 | 35.4   | 0.294211031 |
| 31126968 | AQAPASPYNDYEGR                         |                  | retinoic acid induced 3 [Mus musculus]                                                              | 1538.6909 | 62.91  | 0.399366515 |
| 31982724 | AQDASLNVPER                            |                  | MYB binding protein (P160) 1a [Mus musculus]                                                        | 1199.604  | 35.66  | 0           |
| 63530525 | AQDQSSPSLQDLIEK                        |                  | PREDICTED: SEC31-like 1 [Mus musculus]                                                              | 1700.8538 | 44.68  | 0           |

|          |                             |                                                                                                    |           |        |             |
|----------|-----------------------------|----------------------------------------------------------------------------------------------------|-----------|--------|-------------|
| 31982520 | AQDTAELFFEDVR               | acetyl-Coenzyme A dehydrogenase, long-chain [Mus musculus]                                         | 1540.7275 | 93.82  | 0.481731256 |
| 51828444 | AQEAAAEPPPAVTPAASVSALDLGEQR | PREDICTED: proline-rich polypeptide 6 [Mus musculus]                                               | 2775.3792 | 124.26 | 0.203277336 |
| 9789985  | AQEIDQTNDFK                 | isovaleryl coenzyme A dehydrogenase [Mus musculus]                                                 | 1308.6012 | 25.86  | 0           |
| 6754256  | AQFEGIVTDLIK                | heat shock protein 9A [Mus musculus]                                                               | 1333.7333 | 81.96  | 0           |
| 29789289 | AQFGQPEILLGTIPGAGGTQR       | enoyl Coenzyme A hydratase, short chain, 1, mitochondrial [Mus musculus]                           | 2111.1272 | 81.11  | 0.287380955 |
| 63556652 | AQGDPHYTTFDGR               | PREDICTED: similar to Fc fragment of IgG binding protein [Mus musculus]                            | 1464.6484 | 38.9   | 0           |
| 6679583  | AQIWDTAGQER                 | RAB11B, member RAS oncogene family [Mus musculus]                                                  | 1274.6165 | 65.39  | 0.570394158 |
| 31560313 | AQLFALTGVQPAR               | ubiquitin specific protease 14 [Mus musculus]                                                      | 1371.7755 | 54.92  | 0           |
| 13385998 | AQLLQPTLEINPR               | TNF receptor-associated protein 1 [Mus musculus]                                                   | 1492.8522 | 37.38  | 0           |
| 37537522 | AQNIGLENLLEVIITSTVEETEK     | epiplakin 1 [Mus musculus]                                                                         | 2430.2593 | 27.7   | 0           |
| 50355692 | AQNTWGCSSLR                 | lamin A isoform A [Mus musculus]                                                                   | 1279.5897 | 57.23  | 0.319439774 |
| 6679809  | AQQVAVQEQEIAR               | flotillin 1 [Mus musculus]                                                                         | 1469.7727 | 48.79  | 0           |
| 21536220 | AQSELSGADEAAR               | ATP synthase, H+ transporting, mitochondrial F1 complex, delta subunit precursor [Mus musculus]    | 1375.6479 | 73.22  | 0.252118764 |
| 33468857 | AQVAQPGGDTIFGK              | histidine triad nucleotide binding protein 1 [Mus musculus]                                        | 1388.7113 | 68.08  | 0           |
| 41322904 | AQVEQELTTLR                 | plectin 1 isoform 1 [Mus musculus]                                                                 | 1287.6873 | 31.57  | 0           |
| 29244176 | AQYEDIANR                   | hypothetical protein 4732456N10 [Mus musculus]                                                     | 1079.5144 | 26.75  | 0.4259699   |
| 13624315 | AQYEDIANR                   | keratin complex 2, basic, gene 8 [Mus musculus]                                                    | 1079.5144 | 26.75  | 0.4259699   |
| 29789317 | AQYEDIANR                   | keratinocyte associated protein 1 [Mus musculus]                                                   | 1079.5144 | 26.75  | 0.4259699   |
| 63565108 | AQYEDIANR                   | PREDICTED: similar to cytokeratin EndoA - mouse [Mus musculus]                                     | 1079.5144 | 26.75  | 0.4259699   |
| 6754036  | ASAELALGENNEVLK             | glutamate oxaloacetate transaminase 2, mitochondrial [Mus musculus]                                | 1557.7871 | 29.83  | 6.013045919 |
| 6754556  | ASAPATPLSPTR                | lamin B1 [Mus musculus]                                                                            | 1168.6357 | 53.54  | 0.308752991 |
| 34328206 | ASEDFVDPWVTVR               | tryptophanyl-tRNA synthetase [Mus musculus]                                                        | 1421.6697 | 48.46  | 0.552704125 |
| 39930409 | ASELVSDKR                   | Rab6 interacting protein 1 [Mus musculus]                                                          | 1004.5176 | 26.95  | 0.179616267 |
| 63540743 | ASGPGLNASGIPASLPVEFTIDAR    | PREDICTED: filamin C, gamma [Mus musculus]                                                         | 2340.2144 | 22.82  | 2.815373777 |
| 63746482 | ASGPGLNTTGVPASLPVEFTIDAK    | PREDICTED: filamin, alpha [Mus musculus]                                                           | 2342.2283 | 72.14  | 0           |
| 9845257  | ASGPPVSELITK                | histone 1, H1c [Mus musculus]                                                                      | 1198.6655 | 83.95  | 0.330550228 |
| 34328365 | ASGPPVSELITK                | histone 1, H1d [Mus musculus]                                                                      | 1198.6655 | 83.95  | 0.330550228 |
| 6753076  | ASGYLELSNWPEDPSPVR          | adaptor-related protein complex 3, beta 1 subunit [Mus musculus]                                   | 2187.0701 | 42.81  | 0           |
| 13624315 | ASLEAAIADAEQR               | keratin complex 2, basic, gene 8 [Mus musculus]                                                    | 1344.6788 | 95.67  | 0.45324242  |
| 6679931  | ASLGLTNTLADVPDDEVQGR        | UDP-N-acetyl-alpha-D-galactosamine: (N-acetylneuraminy)-galactosyl-N- acetylglucosaminylpolypeptid | 2071.0295 | 53.31  | 0.190184531 |
| 23956084 | ASNTSEVYFDGVK               | acyl-Coenzyme A dehydrogenase, very long chain [Mus musculus]                                      | 1416.6666 | 30.21  | 0.764141292 |
| 21746169 | ASQEFLEDGDPDGLFSR           | zinc finger CCCH type, antiviral 1 [Mus musculus]                                                  | 1882.8406 | 26.08  | 0           |
| 31543605 | ASSFVLALEPELESR             | ribophorin I [Mus musculus]                                                                        | 1647.8612 | 68.62  | 0.486024638 |
| 38198665 | ASSSILINEAEPPTNIQIR         | p47 protein [Mus musculus]                                                                         | 2057.0859 | 48.9   | 0.542466639 |
| 31982522 | ASSTANLIFEDCR               | acyl-Coenzyme A dehydrogenase, short chain [Mus musculus]                                          | 1426.6661 | 62.89  | 0.383433736 |
| 21313526 | ASTPDWPSQDPQGLQR            | hypothetical protein LOC78906 [Mus musculus]                                                       | 1879.8959 | 55.88  | 0.792081792 |

| GI #     | Sequence                | Modifications | Protien Name                                                                              | M/z       | Highest Mascot score | Average Ratio (15N:14N), non-Log-transformed |
|----------|-------------------------|---------------|-------------------------------------------------------------------------------------------|-----------|----------------------|----------------------------------------------|
| 13385938 | ASVASDPESPPGGNEPAAASGQR |               | RNA (guanine-7-) methyltransferase [Mus musculus]                                         | 2151.9941 | 32.63                | 1.016684863                                  |
| 6678499  | ASVGFSGSCFQK            |               | UDP-glucose dehydrogenase [Mus musculus]                                                  | 1187.5546 | 53.91                | 0                                            |
| 8567336  | ASVTALIESVNGK           |               | chloride channel calcium activated 3 [Mus musculus]                                       | 1288.7048 | 101.82               | 1.085283839                                  |
| 13384736 | ASVVTLPVYLNFTTR         |               | dynein, cytoplasmic, heavy chain 1 [Mus musculus]                                         | 1579.8848 | 39.46                | 0.313531773                                  |
| 12963591 | ASYGVEDPEYAVTQLAQTTMR   |               | stomatatin-like protein 2 [Mus musculus]                                                  | 2330.0959 | 51.99                | 0.986585588                                  |
| 6681143  | ASYSAVSLYGNPVR          |               | decorin [Mus musculus]                                                                    | 1483.7496 | 42.14                | 0                                            |
| 9845283  | ASYVAPLTAQPATYR         |               | RNA binding motif protein 14 [Mus musculus]                                               | 1608.8392 | 53.15                | 0.423010479                                  |
| 50080209 | ATAGDTHLGGEDFDNR        |               | heat shock protein 1A [Mus musculus]                                                      | 1675.7378 | 90.88                | 0                                            |
| 7305163  | ATAGDTHLGGEDFDNR        |               | heat shock protein 1-like [Mus musculus]                                                  | 1675.7378 | 90.88                | 0                                            |
| 6754976  | ATAVMPDGGQFK            |               | peroxiredoxin 1 [Mus musculus]                                                            | 1164.5659 | 64.93                | 0                                            |
| 6754976  | ATAVMPDGGQFK            | Oxidation (M) | peroxiredoxin 1 [Mus musculus]                                                            | 1180.5638 | 31.3                 | 0                                            |
| 6755114  | ATDLLLDDSLVSLFGNR       |               | peroxiredoxin 5 precursor [Mus musculus]                                                  | 1848.9685 | 28.59                | 0.741020194                                  |
| 6679567  | ATEMVEVGPEDDEVGAEER     |               | polymerase I and transcript release factor [Mus musculus]                                 | 1932.8521 | 101.75               | 0                                            |
| 6679567  | ATEMVEVGPEDDEVGAEER     | Oxidation (M) | polymerase I and transcript release factor [Mus musculus]                                 | 1948.8392 | 75.04                | 0.156540369                                  |
| 63602733 | ATENDIANFFSPLNPIR       |               | PREDICTED: similar to heterogeneous nuclear ribonucleoprotein H3 isoform a [Mus musculus] | 1918.9646 | 45.82                | 0.27358102                                   |
| 9845253  | ATENDIYNFFSPLNPMR       |               | heterogeneous nuclear ribonucleoprotein H2 [Mus musculus]                                 | 2028.9524 | 48.21                | 0                                            |
| 19527048 | ATENDIYNFFSPLNPVR       |               | heterogeneous nuclear ribonucleoprotein F [Mus musculus]                                  | 1996.981  | 79.63                | 0.515467471                                  |
| 10946928 | ATENDIYNFFSPLNPVR       |               | heterogeneous nuclear ribonucleoprotein H1 [Mus musculus]                                 | 1996.981  | 79.63                | 0.515467471                                  |
| 6677871  | ATEVPLSWESFNK           |               | scinderin [Mus musculus]                                                                  | 1507.7402 | 36.21                | 0                                            |
| 25020120 | ATGDPWLTDGSYLDGSGFAR    |               | PREDICTED: laminin, alpha 5 [Mus musculus]                                                | 2085.9561 | 27.58                | 0.436226721                                  |
| 55741703 | ATGVLLYDLVSR            |               | glutaminyI-tRNA synthetase [Mus musculus]                                                 | 1306.7371 | 43.26                | 0.967302001                                  |
| 7305295  | ATLQAEQLSNELATER        |               | myosin, heavy polypeptide 11, smooth muscle [Mus musculus]                                | 1773.9043 | 90.58                | 0.118911428                                  |

|          |                             |                                                                                                          |           |        |             |
|----------|-----------------------------|----------------------------------------------------------------------------------------------------------|-----------|--------|-------------|
| 6753492  | ATPEPSGTPSSDVTVR            | coronin, actin binding protein 1A [Mus musculus]                                                         | 1588.7482 | 77.6   | 1.847325656 |
| 21450625 | ATQALVLPATR                 | eukaryotic translation initiation factor 4A1 [Mus musculus]                                              | 1140.6744 | 32.07  | 0.418627052 |
| 21728376 | ATSNVFAMFDQSQIQEFK          | myosin regulatory light chain-like [Mus musculus]                                                        | 2090.9885 | 50.41  | 0           |
| 63492583 | ATSNVFAMFDQSQIQEFK          | PREDICTED: myosin regulatory light polypeptide 9 [Mus musculus]                                          | 2090.9885 | 50.41  | 0           |
| 33859650 | ATYSTNSPVWEEAFR             | membrane bound C2 domain containing protein [Mus musculus]                                               | 1757.8159 | 35.98  | 0           |
| 6755809  | AVAEQIPLLQGVVR              | talin 1 [Mus musculus]                                                                                   | 1492.8833 | 35.17  | 0.217363025 |
| 6753320  | AVAQALEVIPR                 | chaperonin subunit 3 (gamma) [Mus musculus]                                                              | 1166.6888 | 36.19  | 0           |
| 22267442 | AVAQGNLSSADVQAAK            | ubiquinol cytochrome c reductase core protein 2 [Mus musculus]                                           | 1529.7911 | 120.83 | 1.093950936 |
| 6755566  | AVDPDSPAESGLR               | solute carrier family 9 (sodium/hydrogen exchanger), isoform 3 regulator 1 [Mus musculus]                | 1384.6688 | 24.87  | 0           |
| 6680748  | AVDSLVPIGR                  | ATP synthase, H+ transporting, mitochondrial F1 complex, alpha subunit, isoform 1 [Mus musculus]         | 1026.5908 | 61.76  | 0.321238228 |
| 25020120 | AVEASNAYSSILQAVQAAEDAAGQALR | PREDICTED: laminin, alpha 5 [Mus musculus]                                                               | 2704.3462 | 41.56  | 0           |
| 34610207 | AVFDETYPPDVR                | alanyl-tRNA synthetase [Mus musculus]                                                                    | 1408.6779 | 34.02  | 0.61007611  |
| 38090591 | AVFPYLLDDVYENAVDAAR         | PREDICTED: RIKEN cDNA A230046K03 gene [Mus musculus]                                                     | 2141.0593 | 23.52  | 0           |
| 18079351 | AVFPQNLVVSSVDVQSVPEVDQR     | major vault protein [Mus musculus]                                                                       | 2569.3279 | 78.13  | 0.427824803 |
| 21450277 | AVFQANQENLPIK               | Na+/K+ -ATPase alpha 1 subunit [Mus musculus]                                                            | 1584.8708 | 95.47  | 0.389866782 |
| 6678467  | AVFVDLEPTVIDEIR             | tubulin, alpha 4 [Mus musculus]                                                                          | 1715.9208 | 105.84 | 0.505735179 |
| 34740335 | AVFVDLEPTVIDEVR             | tubulin, alpha 2 [Mus musculus]                                                                          | 1701.9098 | 109    | 0.489381878 |
| 6678469  | AVFVDLEPTVIDEVR             | tubulin, alpha 6 [Mus musculus]                                                                          | 1701.9098 | 109    | 0.489381878 |
| 28916673 | AVITSLLDQIPEMFADTR          | SEC24 related gene family, member C [Mus musculus]                                                       | 2020.0509 | 28.38  | 0           |
| 34328204 | AVLGEVALYSGAR               | valyl-tRNA synthetase 2 [Mus musculus]                                                                   | 1305.7161 | 27.85  | 0.91877102  |
| 30424996 | AVLPVAESFGFADEIR            | elongation factor Tu GTP binding domain containing 1 [Mus musculus]                                      | 1720.8854 | 34.8   | 0           |
| 22165384 | AVLVDLEPGTMDSVR             | tubulin, beta, 2 [Mus musculus]                                                                          | 1601.8167 | 68.31  | 0.847210127 |
| 31981939 | AVLVDLEPGTMDSVR             | tubulin, beta 4 [Mus musculus]                                                                           | 1601.8167 | 68.31  | 0.847210127 |
| 6755354  | AVPQLQGYYLR                 | ribosomal protein L6 [Mus musculus]                                                                      | 1144.6487 | 39.11  | 0.524149702 |
| 16716471 | AVPVSNIPAAVGR               | hypothetical protein LOC94184 [Mus musculus]                                                             | 1321.7535 | 44.37  | 0.313321698 |
| 7305085  | AVQTLQMEQLQIMK              | glutamine fructose-6-phosphate transaminase 1 [Mus musculus]                                             | 1660.8705 | 60.18  | 0           |
| 6756037  | AVTELNEPLSNEDR              | tyrosine 3-monooxygenase/tryptophan 5-monooxygenase activation protein, eta polypeptide [Mus musculus]   | 1586.7637 | 44.76  | 0.47668472  |
| 6756039  | AVTEQGAELSNEER              | tyrosine 3-monooxygenase/tryptophan 5-monooxygenase activation protein, theta polypeptide [Mus musculus] | 1532.7205 | 81.08  | 0           |
| 37537522 | AVTGYTDPYTGQDISLFAQMQR      | epiplakin 1 [Mus musculus]                                                                               | 2462.1768 | 36.24  | 0.156072837 |
| 7305173  | AVTQSAEITIPVTFEAR           | heat shock protein 1 [Mus musculus]                                                                      | 1832.9706 | 49.5   | 0           |
| 31543605 | AVTSEIAVLQSR                | ribophorin I [Mus musculus]                                                                              | 1273.7086 | 71.52  | 0.341967718 |
| 22122387 | AVVLPISLATTFK               | cystathionase [Mus musculus]                                                                             | 1359.8207 | 73.95  | 6.043070293 |
| 6680982  | AVYQGGPSSPVK                | catechol-O-methyltransferase [Mus musculus]                                                              | 1189.6091 | 28.08  | 0.569179838 |
| 14149750 | AWDDFFPGSDR                 | ADP-ribosylation factor-like 6 interacting protein 5 [Mus musculus]                                      | 1312.5654 | 41.66  | 0.336811501 |
| 63746482 | AWGPGLEGGIVGK               | PREDICTED: filamin, alpha [Mus musculus]                                                                 | 1240.6615 | 75.2   | 0           |
| 7106381  | AYAQLTEVAR                  | protein kinase C and casein kinase substrate in neurons 2 [Mus musculus]                                 | 1336.665  | 42.45  | 0.88334529  |
| 58037109 | AYDLVVDWPVTLVR              | NADH dehydrogenase (ubiquinone) 1 beta subcomplex, 10 [Mus musculus]                                     | 1645.8939 | 25.9   | 0.332504273 |
| 6678419  | AYDYLIQNTSFANR              | tripeptidyl peptidase II [Mus musculus]                                                                  | 1675.8167 | 47.67  | 0           |
| 6753138  | AYGENIGYSEK                 | Na+/K+ -ATPase beta 1 subunit [Mus musculus]                                                             | 1230.5604 | 80.23  | 0.276749972 |
| 6753138  | AYGENIGYSEKDR               | Na+/K+ -ATPase beta 1 subunit [Mus musculus]                                                             | 1501.6952 | 68.07  | 0.17847243  |
| 63746482 | AYGPGIEPTGNMVK              | PREDICTED: filamin, alpha [Mus musculus]                                                                 | 1433.7079 | 44.48  | 0.367421116 |
| 63746482 | AYGPGIEPTGNMVK              | PREDICTED: filamin, alpha [Mus musculus]                                                                 | 1449.6927 | 43.77  | 0           |
| 33859482 | AYLPVNESFGFTADLR            | eukaryotic translation elongation factor 2 [Mus musculus]                                                | 1799.8972 | 94     | 0.444809226 |
| 26024211 | CIHQSLDNNR                  | constitutive photomorphogenic protein 1 [Mus musculus]                                                   | 1330.5828 | 27.98  | 0           |
| 63489795 | CQNELLNEQTQLQEDISK          | PREDICTED: centrosomal protein 1 [Mus musculus]                                                          | 2137.9163 | 22.84  | 0           |
| 15042957 | DAADQNFDYMFK                | RAB3D, member RAS oncogene family [Mus musculus]                                                         | 1464.6195 | 50.29  | 0           |
| 6679491  | DADSIHQVLLQR                | aminopeptidase puromycin sensitive [Mus musculus]                                                        | 1458.7272 | 35.54  | 0           |
| 6755478  | DAEDAMDAMDGAVLDR            | splicing factor, arginine/serine-rich 2 [Mus musculus]                                                   | 1751.7332 | 132.5  | 0           |
| 6753484  | DAEEVISQITIDTIVDMIK         | procollagen, type VI, alpha 1 [Mus musculus]                                                             | 2036.0209 | 25.4   | 0           |
| 6754482  | DAETTLTEL                   | keratin complex 1, acidic, gene 18 [Mus musculus]                                                        | 1148.5708 | 58.26  | 0.211870294 |
| 6753066  | DAFCVFEQNGQLPLR             | amine oxidase, copper containing 3 [Mus musculus]                                                        | 1736.8453 | 22.16  | 0           |
| 31982526 | DAFDTLFDHAPDK               | parvin, alpha [Mus musculus]                                                                             | 1491.6792 | 30.58  | 0           |
| 21450277 | DAFQNAYLELGGGLGER           | Na+/K+ -ATPase alpha 1 subunit [Mus musculus]                                                            | 1752.8579 | 79.38  | 0.266927893 |
| 46358373 | DAFVILVENALR                | CDW92 antigen [Mus musculus]                                                                             | 1359.7623 | 25.73  | 0.31497699  |
| 6754036  | DAGMQLQGYR                  | glutamate oxaloacetate transaminase 2, mitochondrial [Mus musculus]                                      | 1138.5309 | 26.86  | 0           |
| 31981690 | DAGTIAGLNVLR                | heat shock protein 8 [Mus musculus]                                                                      | 1199.6786 | 64.58  | 0.386988909 |
| 63664182 | DAGTIAGLNVLR                | PREDICTED: similar to heat shock protein 8 [Mus musculus]                                                | 1199.6786 | 64.58  | 0.386988909 |
| 31981722 | DAGTIAGLNVMR                | heat shock 70kD protein 5 (glucose-regulated protein) [Mus musculus]                                     | 1217.629  | 65.28  | 0.785271696 |
| 50080209 | DAGVIAGLNVLR                | heat shock protein 1A [Mus musculus]                                                                     | 1197.694  | 35.59  | 0.25341389  |
| 7305163  | DAGVIAGLNVLR                | heat shock protein 1-like [Mus musculus]                                                                 | 1197.694  | 35.59  | 0.25341389  |

|          |                            |                                                                                                     |           |        |             |
|----------|----------------------------|-----------------------------------------------------------------------------------------------------|-----------|--------|-------------|
| 30424898 | DALVNAVIDSLSAYR            | SEC24 related gene family, member A [Mus musculus]                                                  | 1606.8446 | 38.99  | 1.853674387 |
| 31542602 | DANLYISGLPR                | ELAV (embryonic lethal, abnormal vision, Drosophila)-like 1 (Hu antigen R) [Mus musculus]           | 1218.6337 | 52.32  | 0           |
| 51827543 | DAPNDASYDAVR               | PREDICTED: GCN1 general control of amino-acid synthesis 1-like 1 [Mus musculus]                     | 1293.5728 | 30.19  | 0.770125274 |
| 18079351 | DAQSSVLFVDTGQVR            | major vault protein [Mus musculus]                                                                  | 1621.8135 | 100.01 | 0.76142689  |
| 21592285 | DAQVQNAQCCLR               | keratin 20 [Mus musculus]                                                                           | 1344.6715 | 37.74  | 0.502911819 |
| 9790019  | DAQWVGFTFR                 | N-acylsphingosine amidohydrolase (acid ceramidase) 1 [Mus musculus]                                 | 1192.6177 | 33.52  | 0.461405825 |
| 30348966 | DASVAEAWLLGQEPYLSR         | spectrin beta 2 isoform 1 [Mus musculus]                                                            | 2092.0376 | 63.97  | 0.358955462 |
| 7106421  | DASVAEAWLLGQEPYLSR         | spectrin beta 2 isoform 2 [Mus musculus]                                                            | 2092.0376 | 63.97  | 0.358955462 |
| 6679687  | DASVVGFFR                  | glucose regulated protein [Mus musculus]                                                            | 997.5143  | 58.63  | 0.75340922  |
| 51770896 | DATNVGDEGGFAPNILENK        | PREDICTED: similar to Alpha enolase (2-phospho-D-glycerate hydro-lyase) (Non-neural enolase) (NNE)  | 1960.9247 | 85.3   | 0.501165359 |
| 6679651  | DATNVGDEGGFAPNILENNEALELLK | enolase 3, beta muscle [Mus musculus]                                                               | 2743.3494 | 62.5   | 1.156780855 |
| 31982273 | DATSLNQAALYR               | hydroxysteroid (17-beta) dehydrogenase 4 [Mus musculus]                                             | 1322.6747 | 33.44  | 3.718866173 |
| 31542333 | DAVIYPILVEFTR              | hypoxia up-regulated 1 [Mus musculus]                                                               | 1535.8544 | 76.52  | 0.429473961 |
| 6680716  | DAVLLVFANK                 | ADP-ribosylation factor 1 [Mus musculus]                                                            | 1089.6287 | 57.85  | 0.368687983 |
| 6680722  | DAVLLVFANK                 | ADP-ribosylation factor 5 [Mus musculus]                                                            | 1089.6287 | 57.85  | 0.368687983 |
| 31981562 | DAVLNAWAEDVDLR             | pyruvate kinase 3 [Mus musculus]                                                                    | 1586.7831 | 94.13  | 0.448997295 |
| 6755204  | DAYSGAVNLYHVR              | proteasome (prosome, macropain) subunit, beta type 5 [Mus musculus]                                 | 1521.744  | 40.21  | 0.339537653 |
| 7242205  | DCPDNAEEYER                | cytoplasmic FMR1 interacting protein 1 [Mus musculus]                                               | 1340.5117 | 26.51  | 0           |
| 6679291  | DCVGPEVENACANPAAGTVILLENLR | phosphoglycerate kinase 1 [Mus musculus]                                                            | 2668.3081 | 54.93  | 0.294650145 |
| 56699423 | DDFLGQVDVPLYPPTENPR        | neural precursor cell expressed, developmentally down-regulated gene 4 [Mus musculus]               | 2285.1455 | 81.31  | 0.674658345 |
| 6680027  | DDGSWEVIEGYR               | glutamate dehydrogenase 1 [Mus musculus]                                                            | 1425.6316 | 71.8   | 0.332636745 |
| 63738313 | DDGVFVQEVMMQNSPAAR         | PREDICTED: similar to AHNAK [Mus musculus]                                                          | 1862.8665 | 30.17  | 0           |
| 31982122 | DDLIASILSEVTPPLEELR        | phospholipase C, beta 3 [Mus musculus]                                                              | 2211.1772 | 62.1   | 0.375687554 |
| 6754036  | DDNGKPYVLPVSR              | glutamate oxaloacetate transaminase 2, mitochondrial [Mus musculus]                                 | 1459.7515 | 56.08  | 0.290207302 |
| 33859506 | DDNPSLPPFERPEAEAMCTSFK     | albumin 1 [Mus musculus]                                                                            | 2481.1072 | 37.64  | 0.043802017 |
| 51831125 | DDPAPLGTASEPTLQK           | PREDICTED: similar to extensin-like protein [Mus musculus]                                          | 1639.8459 | 25.64  | 0           |
| 41322904 | DDPSGQMLLLSDAR             | plectin 1 isoform 1 [Mus musculus]                                                                  | 1630.8141 | 37.49  | 1.108678316 |
| 19072792 | DDTESLEIFQNEVAR            | thioredoxin domain containing 4 [Mus musculus]                                                      | 1765.8326 | 31.91  | 0           |
| 6681027  | DDTYQSYSSPSR               | deleted in malignant brain tumors 1 [Mus musculus]                                                  | 1502.6465 | 53.52  | 0           |
| 63622229 | DDVAQEPWLVPGSNDLLLEVGR     | PREDICTED: phosphoribosylformylglycinamide synthase (FGAR amidotransferase) [Mus musculus]          | 2519.2722 | 44.2   | 1.179737152 |
| 6671664  | DEEEEEKLEEK                | calnexin [Mus musculus]                                                                             | 1535.6593 | 48.55  | 0           |
| 63487108 | DEGSWQDGDSSQEITR           | PREDICTED: similar to mKIAA1741 protein [Mus musculus]                                              | 1809.7708 | 45.12  | 0.648034132 |
| 14149647 | DELILEGNDIELVSNAAIQQATTVK  | ribosomal protein L9 [Mus musculus]                                                                 | 2884.5244 | 39.89  | 1.00940961  |
| 38090710 | DENGALIR                   | PREDICTED: protein phosphatase 1, regulatory (inhibitor) subunit 12A [Mus musculus]                 | 888.4576  | 38.8   | 0           |
| 21389320 | DESSDNFGSFFLR              | leucine-rich PPR motif-containing protein [Mus musculus]                                            | 1520.6755 | 37.37  | 0.460793773 |
| 31981100 | DESSPYAAMLAQDVAQR          | ribosomal protein S14 [Mus musculus]                                                                | 1922.8953 | 91.95  | 0.528327212 |
| 6680047  | DETNYGIPQR                 | guanine nucleotide binding protein (G protein), beta polypeptide 2 like 1 [Mus musculus]            | 1192.5723 | 46.93  | 0.444869835 |
| 7305031  | DEVDAEESTPTDRR             | erythrocyte protein band 4.1-like 3 [Mus musculus]                                                  | 1561.7007 | 42.2   | 0           |
| 22203747 | DFDSLQPSFFDR               | procollagen, type VI, alpha 2 [Mus musculus]                                                        | 1544.7076 | 43.3   | 0           |
| 8393150  | DFEQPLAISR                 | carboxyl terminal LIM domain protein 1 [Mus musculus]                                               | 1175.6018 | 47.97  | 0.587323566 |
| 7305075  | DFEQNFGNVVELR              | ras-GTPase-activating protein SH3-domain binding protein [Mus musculus]                             | 1584.7856 | 29.55  | 0.429595175 |
| 21704100 | DFIYVSQDPK                 | hydroxyacyl-Coenzyme A dehydrogenase/3-ketoacyl-Coenzyme A thiolase/enoyl-Coenzyme A hydratase (tri | 1211.592  | 60.75  | 0           |
| 22094075 | DFLAGGVAIAISK              | solute carrier family 25, member 5 [Mus musculus]                                                   | 1219.6616 | 101.87 | 0           |
| 27734182 | DFLAGLAYR                  | tryptophan hydroxylase 2 [Mus musculus]                                                             | 1025.5504 | 26.66  | 0           |
| 31981282 | DFLLQQTMLR                 | glyoxalase 1 [Mus musculus]                                                                         | 1264.6743 | 34.87  | 0           |
| 6755142  | DFMIQGGDFTR                | peptidylprolyl isomerase B [Mus musculus]                                                           | 1286.5845 | 70.83  | 0           |
| 24418919 | DFNVGDYIEAVLDR             | brain glycogen phosphorylase [Mus musculus]                                                         | 1625.7837 | 65.06  | 0.247698896 |
| 42475998 | DFNVPLSISR                 | PDZ and LIM domain 7 [Mus musculus]                                                                 | 1147.6118 | 49.4   | 0           |
| 6753240  | DFPEYTFIAIIDEEDYATEVK      | calcium binding protein, intestinal [Mus musculus]                                                  | 2353.0537 | 44.93  | 0.452026098 |
| 31981657 | DFPIANGDR                  | carbonic anhydrase 2 [Mus musculus]                                                                 | 1004.4816 | 35.14  | 0.232090838 |
| 58037117 | DFPLTGYVELR                | NADH dehydrogenase (ubiquinone) Fe-S protein 3 [Mus musculus]                                       | 1309.6837 | 57.73  | 0           |
| 22129770 | DFPQYFAVVSRR               | ankyrin 3, epithelial isoform b [Mus musculus]                                                      | 1328.6616 | 31.59  | 0           |
| 20137006 | DFSALESQQLQDTQELLQEENR     | myosin, heavy polypeptide 9, non-muscle [Mus musculus]                                              | 2493.1729 | 149.94 | 0.615695915 |
| 29126205 | DFSATDLTEFAAR              | acetyl-Coenzyme A acyltransferase 2 (mitochondrial 3-oxoacyl-Coenzyme A thiolase) [Mus musculus]    | 1443.6796 | 78.7   | 0.236114258 |
| 6679237  | DFTATFGPLDSLNTNR           | pyruvate carboxylase [Mus musculus]                                                                 | 1654.8116 | 51.36  | 0           |
| 6755714  | DFTDSQLQEGK                | transgelin [Mus musculus]                                                                           | 1267.5797 | 69.43  | 0.105989467 |
| 10181184 | DFTPSGIAGAFR               | ATP synthase, H+ transporting, mitochondrial F0 complex, subunit f, isoform 2 [Mus musculus]        | 1238.6166 | 63.48  | 0.308259273 |
| 21450625 | DFTVSAMHGDMQDK             | eukaryotic translation initiation factor 4A1 [Mus musculus]                                         | 1581.6803 | 51.03  | 0.636103063 |
| 63737068 | DFVDYFLIQR                 | PREDICTED: similar to Cyp2c40 protein [Mus musculus]                                                | 1315.6732 | 29.79  | 0           |
| 24429590 | DFVNYLVR                   | DEAH (Asp-Glu-Ala-His) box polypeptide 9 [Mus musculus]                                             | 1025.5464 | 43.27  | 0.4068558   |

Deamidation (NQ)

|          |                             |                                    |                                                                                                      |           |        |             |
|----------|-----------------------------|------------------------------------|------------------------------------------------------------------------------------------------------|-----------|--------|-------------|
| 63476037 | DFVTNLVNSLDVGSNDNR          |                                    | PREDICTED: procollagen, type VI, alpha 3 [Mus musculus]                                              | 1977.9904 | 43.96  | 1.388671429 |
| 21704020 | DFYMTDSISR                  |                                    | NADH dehydrogenase (ubiquinone) Fe-S protein 1 [Mus musculus]                                        | 1234.543  | 41.8   | 0           |
| 6753438  | DFYNPLVPEAQK                |                                    | claudin 3 [Mus musculus]                                                                             | 1420.7023 | 32.09  | 0.932616074 |
| 6681233  | DGAFDFFPVLR                 |                                    | solute carrier family 26 (sulfate transporter), member 2 [Mus musculus]                              | 1283.645  | 35.02  | 0.141113301 |
| 30911099 | DGAWGAFR                    |                                    | fatty acid synthase [Mus musculus]                                                                   | 879.4144  | 27.51  | 0.494943142 |
| 58037267 | DGELPVEDDIDLSDELDDLEKDEL    |                                    | protein disulfide isomerase-associated 6 [Mus musculus]                                              | 2830.2913 | 79.66  | 0.328893461 |
| 27151748 | DGENYVLLDITLPR              |                                    | nodal modulator 1 [Mus musculus]                                                                     | 1704.8802 | 24.12  | 0           |
| 33563250 | DGEVVSEATQQQHEVL            |                                    | desmin [Mus musculus]                                                                                | 1768.8365 | 100.29 | 0           |
| 22164798 | DGFNPAHVAGLYGSR             |                                    | selenium binding protein 1 [Mus musculus]                                                            | 1689.7979 | 105.63 | 0.231591094 |
| 31560611 | DGIILCEFINK                 |                                    | calponin 1 [Mus musculus]                                                                            | 1264.6602 | 78.02  | 0.054501269 |
| 26986607 | DGIQLSEYLPEVTDLLR           |                                    | nucleoporin 133 [Mus musculus]                                                                       | 1961.0199 | 28.44  | 0           |
| 21450129 | DGLTDVYNK                   |                                    | acetyl-Coenzyme A acetyltransferase 1 precursor [Mus musculus]                                       | 1024.483  | 23.22  | 0.467526037 |
| 55742711 | DGMLDDEEFALASHLIEAK         |                                    | EH-domain containing 2 [Mus musculus]                                                                | 2104.0012 | 30.1   | 0           |
| 21450277 | DGPNALTPTTPEWVK             |                                    | Na+/K+ -ATPase alpha 1 subunit [Mus musculus]                                                        | 1819.9253 | 28.57  | 0           |
| 6680047  | DGQAMLWDLNEGK               |                                    | guanine nucleotide binding protein (G protein), beta polypeptide 2 like 1 [Mus musculus]             | 1476.6737 | 58.81  | 0.800760068 |
| 6680047  | DGQAMLWDLNEGK               | Oxidation (M)                      | guanine nucleotide binding protein (G protein), beta polypeptide 2 like 1 [Mus musculus]             | 1492.651  | 42.22  | 0.436409347 |
| 27229048 | DGQVIGIGAGQQSR              |                                    | 5-aminoimidazole-4-carboxamide ribonucleotide formyltransferase/IMP cyclohydrolase [Mus musculus]    | 1385.7065 | 74.23  | 0.394524588 |
| 31982755 | DGQVINETSQHHDDLE            |                                    | vimentin [Mus musculus]                                                                              | 1836.7998 | 64.02  | 0.32581456  |
| 6679891  | DGSDYEGWCWPGSASYPDFTNPR     |                                    | alpha glucosidase 2 alpha neutral subunit [Mus musculus]                                             | 2607.0581 | 80.15  | 0.383542913 |
| 45597447 | DGVANVSIEDR                 |                                    | superoxide dismutase 1, soluble [Mus musculus]                                                       | 1174.5734 | 65.72  | 0.30666931  |
| 27754099 | DGWSLWYAEYR                 |                                    | eukaryotic translation elongation factor 1 gamma [Mus musculus]                                      | 1445.651  | 22.73  | 0.476390485 |
| 18079339 | DGYAQLR                     |                                    | aconitase 2, mitochondrial [Mus musculus]                                                            | 935.4954  | 38.81  | 0.29442778  |
| 34328400 | DGYDYDGYR                   |                                    | splicing factor, arginine/serine-rich 1 (ASF/SF2) [Mus musculus]                                     | 1123.4363 | 42.14  | 0.395391572 |
| 6680117  | DGYMPSQYNSQNWEAR            |                                    | glutathione synthetase [Mus musculus]                                                                | 1945.8208 | 58.34  | 0.357186381 |
| 6671553  | DIANENEAQFQIR               |                                    | adaptor protein complex AP-1, beta 1 subunit [Mus musculus]                                          | 1547.751  | 25.83  | 0           |
| 22203747 | DIANSPELYR                  |                                    | procollagen, type VI, alpha 2 [Mus musculus]                                                         | 1314.6411 | 40.83  | 0.259819904 |
| 6756041  | DICNDVLSLLEK                |                                    | tyrosine 3-monooxygenase/tryptophan 5-monooxygenase activation protein, zeta polypeptide [Mus muscu] | 1361.699  | 72.79  | 0.477707817 |
| 40018610 | DIDAFWLQR                   |                                    | U5 snRNP-specific protein, 200 kDa [Mus musculus]                                                    | 1163.592  | 45.31  | 0.460263201 |
| 46575903 | DIDIEDLEELDPDFIMAK          |                                    | eukaryotic translation initiation factor 3, subunit 10 (theta) [Mus musculus]                        | 2121.0017 | 25.22  | 1.000715084 |
| 51772556 | DIFAMDDKSENEPIENEAAR        |                                    | PREDICTED: similar to Succinate-Coenzyme A ligase, GDP-forming, beta subunit [Mus musculus]          | 2294.0271 | 105.47 | 0.267558514 |
| 58037564 | DIFPIAFPR                   |                                    | protease, serine, 15 [Mus musculus]                                                                  | 1075.5959 | 44.93  | 0.336146701 |
| 27370516 | DIFQEIFDK                   |                                    | isocitrate dehydrogenase 2 (NADP+), mitochondrial [Mus musculus]                                     | 1154.5839 | 47.52  | 0.725291947 |
| 40254595 | DIGAIAQVHAENGIIAEEQQR       |                                    | dihydropyrimidinase-like 2 [Mus musculus]                                                            | 2377.177  | 91.8   | 0.202471293 |
| 6679058  | DIGLPNGLTFDPFSK             |                                    | nidogen 2 [Mus musculus]                                                                             | 1620.818  | 35.59  | 0           |
| 58037564 | DIIALNPLYR                  |                                    | protease, serine, 15 [Mus musculus]                                                                  | 1187.6813 | 40.95  | 1.178575172 |
| 6753074  | DIILPFR                     |                                    | adaptor protein complex AP-2, mu1 [Mus musculus]                                                     | 873.5259  | 24.42  | 0.307137405 |
| 6996913  | DIISDTSGDFR                 |                                    | annexin A2 [Mus musculus]                                                                            | 1225.5757 | 75.88  | 0.376765496 |
| 63556656 | DILCQALAAAYAAACQAAGIK       |                                    | PREDICTED: RIKEN cDNA A430096B05 gene [Mus musculus]                                                 | 1964.991  | 67.38  | 0           |
| 7305445  | DILIQYDR                    |                                    | ribosomal protein S16 [Mus musculus]                                                                 | 1035.5439 | 44.29  | 0.74808208  |
| 19745150 | DILLRPELEELR                |                                    | diaphorase 1 [Mus musculus]                                                                          | 1495.8467 | 23.49  | 0           |
| 6671549  | DINAYNGETPTEK               | Deamidation (NQ)                   | peroxiredoxin 6 [Mus musculus]                                                                       | 1452.6522 | 70.91  | 0           |
| 6753374  | DINDNAPVFNPTSTYQGQVPENEVNAR |                                    | cadherin 1 [Mus musculus]                                                                            | 2888.342  | 132.9  | 0.311697353 |
| 9790073  | DINDNRPTFLQSK               |                                    | cadherin 17 [Mus musculus]                                                                           | 1547.7887 | 23.71  | 0           |
| 18079339 | DINQEVYNFLATAGAK            |                                    | aconitase 2, mitochondrial [Mus musculus]                                                            | 1753.8743 | 125.84 | 0.230338274 |
| 24429590 | DINTDFLLVVLR                |                                    | DEAH (Asp-Glu-Ala-His) box polypeptide 9 [Mus musculus]                                              | 1417.8059 | 54.79  | 0.379365553 |
| 31543605 | DIPAYSQDTFK                 |                                    | ribophorin I [Mus musculus]                                                                          | 1284.6146 | 41.91  | 0           |
| 7305447  | DISEASVFDAYVLPK             |                                    | ribosomal protein S26 [Mus musculus]                                                                 | 1653.8351 | 53.69  | 0           |
| 13385998 | DISEFQHEEFYR                |                                    | TNF receptor-associated protein 1 [Mus musculus]                                                     | 1599.7101 | 58.47  | 0           |
| 31981748 | DISSAVQANPALTELSLR          |                                    | ribonuclease/angiogenesis inhibitor 1 [Mus musculus]                                                 | 1885.0054 | 45.96  | 0.429273917 |
| 6755863  | DISTNYYASQK                 |                                    | tumor rejection antigen gp96 [Mus musculus]                                                          | 1289.5997 | 76.35  | 0.419425674 |
| 23956222 | DITYFIQQLLR                 |                                    | ARP3 actin-related protein 3 homolog [Mus musculus]                                                  | 1409.7849 | 77.79  | 0.591684194 |
| 6755787  | DIVENYFMR                   |                                    | tripartite motif protein 28 [Mus musculus]                                                           | 1186.5574 | 27.79  | 0.591753064 |
| 63476037 | DIVFLVDGSSSLGSPSNFNAIR      |                                    | PREDICTED: procollagen, type VI, alpha 3 [Mus musculus]                                              | 2208.1262 | 87.85  | 0           |
| 36031132 | DIVPGDIVEVAVGDKVPADIR       |                                    | ATPase, Ca++ transporting, fast twitch 1 [Mus musculus]                                              | 2177.1799 | 101.63 | 0.315715732 |
| 27804325 | DIWVQEPESK                  |                                    | monoamine oxidase A [Mus musculus]                                                                   | 1230.597  | 34.3   | 0.128655099 |
| 63664138 | DIYFLPQDQLK                 |                                    | PREDICTED: hypothetical protein LOC219189 [Mus musculus]                                             | 1526.7968 | 27.48  | 0           |
| 38348476 | DKEPVFAVTGMPEENVDR          | Deamidation (NQ);<br>Oxidation (M) | ring finger (C3HC4 type) and KH domain containing 1 [Mus musculus]                                   | 1920.9211 | 30.29  | 0.535542826 |
| 19527026 | DKLDGNELDLSLDLNEVPVK        |                                    | hypothetical protein LOC98238 [Mus musculus]                                                         | 2313.1484 | 37.21  | 0           |
| 6754524  | DLADELALVDVMEDEK            |                                    | lactate dehydrogenase 1, A chain [Mus musculus]                                                      | 1675.8073 | 90.9   | 0.717539236 |
| 6754524  | DLADELALVDVMEDEK            | Oxidation (M)                      | lactate dehydrogenase 1, A chain [Mus musculus]                                                      | 1691.7854 | 64.94  | 0.200849073 |

|          |                             |               |                                                                                                     |           |        |             |
|----------|-----------------------------|---------------|-----------------------------------------------------------------------------------------------------|-----------|--------|-------------|
| 63746482 | DLAEDAPWK                   |               | PREDICTED: filamin, alpha [Mus musculus]                                                            | 1044.4952 | 47.37  | 0           |
| 63660294 | DLAEDAPWK                   |               | PREDICTED: similar to Filamin B (FLN-B) (Beta-filamin) (Actin-binding like protein) (ABP-280-like p | 1044.4952 | 47.37  | 0           |
| 51711855 | DLAEDAPWK                   |               | PREDICTED: similar to Filamin C (Gamma-filamin) (Filamin 2) (Protein FLNc) (Actin-binding like prot | 1044.4952 | 47.37  | 0           |
| 6671549  | DLAILLGMLDPVEK              |               | peroxiredoxin 6 [Mus musculus]                                                                      | 1526.8492 | 80.06  | 0           |
| 6671549  | DLAILLGMLDPVEK              | Oxidation (M) | peroxiredoxin 6 [Mus musculus]                                                                      | 1542.8387 | 83.26  | 0.101569758 |
| 30725863 | DLANGNITWADVEAR             |               | glycyl-tRNA synthetase [Mus musculus]                                                               | 1644.7921 | 66.88  | 0.615816483 |
| 18079351 | DLAVAGPEMQVK                |               | major vault protein [Mus musculus]                                                                  | 1257.6415 | 36.71  | 0           |
| 30348966 | DLDDFQSWLSR                 |               | spectrin beta 2 isoform 1 [Mus musculus]                                                            | 1381.6445 | 46.93  | 0.311780129 |
| 7106421  | DLDDFQSWLSR                 |               | spectrin beta 2 isoform 2 [Mus musculus]                                                            | 1381.6445 | 46.93  | 0.311780129 |
| 27370092 | DLDKPFLLPVESVYIPGR          |               | Tu translation elongation factor, mitochondrial [Mus musculus]                                      | 2145.1575 | 82.11  | 0           |
| 6755809  | DLDQASLAASVQQLAPR           |               | talín 1 [Mus musculus]                                                                              | 1782.9359 | 99.09  | 0           |
| 45598381 | DLDSLHSFVLR                 |               | thioredoxin domain containing 5 [Mus musculus]                                                      | 1301.6841 | 44.71  | 0           |
| 31980726 | DLEALMLDR                   |               | phosphoglucomutase 2 [Mus musculus]                                                                 | 1075.5502 | 29.32  | 0           |
| 6753658  | DLEDKEGEIQAGAK              |               | dynein, cytoplasmic, intermediate chain 2 [Mus musculus]                                            | 1502.7345 | 80.11  | 0           |
| 6680850  | DLEIMQILTR                  |               | caspase 7 [Mus musculus]                                                                            | 1231.6758 | 32.44  | 0           |
| 6753762  | DLELLYPFK                   |               | epoxide hydrolase 1, microsomal [Mus musculus]                                                      | 1137.6176 | 41.08  | 0           |
| 10946574 | DLFDPIIEER                  |               | creatine kinase, brain [Mus musculus]                                                               | 1246.6356 | 65.63  | 0.150129515 |
| 6671762  | DLFDPIQDR                   |               | creatine kinase, muscle [Mus musculus]                                                              | 1231.6349 | 23.22  | 0           |
| 13242328 | DLFEDELVPLFEK               |               | NS1-associated protein 1 [Mus musculus]                                                             | 1593.802  | 60.05  | 0           |
| 6679687  | DLFSDGHSEFLK                |               | glucose regulated protein [Mus musculus]                                                            | 1394.6553 | 57.58  | 0.284572388 |
| 13384652 | DLGADYVLTTEEELR             |               | nuclear receptor-binding factor 1 [Mus musculus]                                                    | 1622.7939 | 31.06  | 0           |
| 25020120 | DLGAQGAVAEAEAEQAQR          |               | PREDICTED: laminin, alpha 5 [Mus musculus]                                                          | 1798.8844 | 45.6   | 0           |
| 19111162 | DLGDEYGWK                   |               | transmembrane protein 9 superfamily member 3 [Mus musculus]                                         | 1082.4988 | 43.34  | 0           |
| 27532959 | DLGEAALNEYLR                |               | aldehyde dehydrogenase 1 family, member L1 [Mus musculus]                                           | 1363.6853 | 73.67  | 0.523565737 |
| 20137006 | DLGEELEALKTELEDLTDSTAAQQELR |               | myosin, heavy polypeptide 9, non-muscle [Mus musculus]                                              | 3017.4778 | 33.12  | 27.25473337 |
| 7305295  | DLGEELEALKTELEDLTDSTATQQELR |               | myosin, heavy polypeptide 11, smooth muscle [Mus musculus]                                          | 3047.4854 | 63.87  | 0.05412737  |
| 56119103 | DLGTDSDQIFISR               |               | guanosine diphosphate (GDP) dissociation inhibitor 3 [Mus musculus]                                 | 1351.6853 | 72.95  | 0.752192953 |
| 38198665 | DLIHDQDEEEEEEEGQR           |               | p47 protein [Mus musculus]                                                                          | 2099.8689 | 80.37  | 0.34459416  |
| 6753620  | DLLDLLVEAK                  |               | DEAD/H (Asp-Glu-Ala-Asp/His) box polypeptide 3, X-linked [Mus musculus]                             | 1128.6521 | 69.45  | 0           |
| 31981400 | DLLFQALGR                   |               | phenylalanine-tRNA synthetase-like, beta subunit [Mus musculus]                                     | 1032.5917 | 46.65  | 0.261830691 |
| 63664138 | DLLGQDVFLIGPPGPLR           |               | PREDICTED: hypothetical protein LOC219189 [Mus musculus]                                            | 1807.0154 | 32.65  | 0.237370631 |
| 26024336 | DLLHPSPEEEK                 |               | ribosomal protein S27 [Mus musculus]                                                                | 1293.6274 | 26.24  | 0           |
| 59709449 | DLLLDPAWEK                  |               | actinin alpha 2 [Mus musculus]                                                                      | 1199.6302 | 49.44  | 0.161782402 |
| 11230802 | DLLLDPAWEK                  |               | actinin alpha 4 [Mus musculus]                                                                      | 1199.6302 | 49.44  | 0.161782402 |
| 6679687  | DLLTAYYDVDEYK               |               | glucose regulated protein [Mus musculus]                                                            | 1607.7559 | 98.57  | 0           |
| 7657429  | DLLTQPGDWTLFAPNTDAFK        |               | osteoblast specific factor 2 (fasciclin I-like) [Mus musculus]                                      | 2250.1101 | 56.14  | 0.307406647 |
| 21312062 | DLLVTGAYEITDQSGGAGGLR       |               | transmembrane trafficking protein [Mus musculus]                                                    | 2093.0503 | 48.12  | 0           |
| 9790163  | DLLYFDGLR                   |               | plakophilin 3 [Mus musculus]                                                                        | 1111.5852 | 22.51  | 0           |
| 30348966 | DLMLWMEDVIR                 |               | spectrin beta 2 isoform 1 [Mus musculus]                                                            | 1420.701  | 22.7   | 0           |
| 7106421  | DLMLWMEDVIR                 |               | spectrin beta 2 isoform 2 [Mus musculus]                                                            | 1420.701  | 22.7   | 0           |
| 63489759 | DLMSWINGIR                  |               | PREDICTED: spectrin alpha 2 [Mus musculus]                                                          | 1204.6215 | 22.75  | 0           |
| 10946928 | DLNYCFSGMSDHR               |               | heterogeneous nuclear ribonucleoprotein H1 [Mus musculus]                                           | 1544.6344 | 31.91  | 0.635889729 |
| 9845253  | DLNYCFSGMSDHR               |               | heterogeneous nuclear ribonucleoprotein H2 [Mus musculus]                                           | 1544.6344 | 31.91  | 0.635889729 |
| 63506134 | DLNYCFSGMSDHR               |               | PREDICTED: similar to Murine homolog of human ftp-3 [Mus musculus]                                  | 1544.6344 | 31.91  | 0.635889729 |
| 6681233  | DLPEEAFGFPSELPLETQR         |               | solute carrier family 26 (sulfate transporter), member 2 [Mus musculus]                             | 2175.0632 | 104.06 | 0.160706905 |
| 31560438 | DLPFETLDVДАР                |               | mitochondrial ribosomal protein L39 [Mus musculus]                                                  | 1390.686  | 39.55  | 2.513345378 |
| 47578123 | DLQLVLPDYFFPER              |               | potassium channel tetramerisation domain containing 12 [Mus musculus]                               | 1604.8334 | 77.65  | 0.602215068 |
| 6671622  | DLQMVNISLR                  |               | B-cell receptor-associated protein 37 [Mus musculus]                                                | 1188.6401 | 39.53  | 0           |
| 6679299  | DLQNVNITLR                  |               | prohibitin [Mus musculus]                                                                           | 1185.6533 | 55.76  | 0.359096136 |
| 6678726  | DLSSHQLNEFLAQLVK            |               | leukotriene A4 hydrolase [Mus musculus]                                                             | 1970.0215 | 48.39  | 0.484020902 |
| 18266680 | DLTAVSNNAGVDNFGLLLR         |               | 3-oxoacid CoA transferase 1 [Mus musculus]                                                          | 2159.1477 | 86.18  | 0.157883722 |
| 6671507  | DLTDYLMK                    |               | actin, alpha 2, smooth muscle, aorta [Mus musculus]                                                 | 998.4867  | 58.83  | 0.186638331 |
| 6671509  | DLTDYLMK                    |               | actin, beta, cytoplasmic [Mus musculus]                                                             | 998.4867  | 58.83  | 0.186638331 |
| 30425250 | DLTDYLMK                    |               | hypothetical protein LOC238880 [Mus musculus]                                                       | 998.4867  | 58.83  | 0.186638331 |
| 63652452 | DLTDYLMK                    |               | PREDICTED: similar to cytoplasmic beta-actin [Mus musculus]                                         | 998.4867  | 58.83  | 0.186638331 |
| 6671507  | DLTDYLMK                    | Oxidation (M) | actin, alpha 2, smooth muscle, aorta [Mus musculus]                                                 | 1014.479  | 42.02  | 0.489276281 |
| 6671509  | DLTDYLMK                    | Oxidation (M) | actin, beta, cytoplasmic [Mus musculus]                                                             | 1014.479  | 42.02  | 0.489276281 |
| 30425250 | DLTDYLMK                    | Oxidation (M) | hypothetical protein LOC238880 [Mus musculus]                                                       | 1014.479  | 42.02  | 0.489276281 |
| 63652452 | DLTDYLMK                    | Oxidation (M) | PREDICTED: similar to cytoplasmic beta-actin [Mus musculus]                                         | 1014.479  | 42.02  | 0.489276281 |
| 63489759 | DLTGVQNLK                   |               | PREDICTED: spectrin alpha 2 [Mus musculus]                                                          | 1015.5463 | 35.42  | 0.508196409 |



|          |                            |                                 |                                                                                                  |           |        |             |
|----------|----------------------------|---------------------------------|--------------------------------------------------------------------------------------------------|-----------|--------|-------------|
| 58037465 | DLTTAGAVTQCYR              |                                 | Ribosomal protein L18A [Mus musculus]                                                            | 1398.6687 | 108    | 0.614275524 |
| 33859686 | DLTTGYDDSQPKK              |                                 | phosphoglucomutase 1 [Mus musculus]                                                              | 1582.7241 | 26.37  | 0           |
| 34328286 | DLVPLDSNFYAYQYK            |                                 | succinate dehydrogenase Ip subunit [Mus musculus]                                                | 1672.8071 | 44.3   | 0.210817604 |
| 29293809 | DLVSSLTSGLLTIGDR           |                                 | ATP citrate lyase [Mus musculus]                                                                 | 1646.901  | 110.05 | 0           |
| 6671507  | DLYANNVLSGGTTMYPGIADR      |                                 | actin, alpha 2, smooth muscle, aorta [Mus musculus]                                              | 2228.0745 | 152.91 | 0           |
| 6671507  | DLYANNVLSGGTTMYPGIADR      | Deamidation (NQ)                | actin, alpha 2, smooth muscle, aorta [Mus musculus]                                              | 2229.0715 | 108.68 | 0           |
| 6671507  | DLYANNVLSGGTTMYPGIADR      | Deamidation (NQ); Oxidation (M) | actin, alpha 2, smooth muscle, aorta [Mus musculus]                                              | 2245.063  | 63.13  | 0           |
| 6671507  | DLYANNVLSGGTTMYPGIADR      | Oxidation (M)                   | actin, alpha 2, smooth muscle, aorta [Mus musculus]                                              | 2244.0632 | 44.22  | 0.086651063 |
| 6671509  | DLYANTVLSGGTTMYPGIADR      |                                 | actin, beta, cytoplasmic [Mus musculus]                                                          | 2215.0857 | 108.07 | 0.616820626 |
| 63652452 | DLYANTVLSGGTTMYPGIADR      |                                 | PREDICTED: similar to cytoplasmic beta-actin [Mus musculus]                                      | 2215.0857 | 108.07 | 0.616820626 |
| 6671509  | DLYANTVLSGGTTMYPGIADR      | Deamidation (NQ)                | actin, beta, cytoplasmic [Mus musculus]                                                          | 2216.0479 | 74.86  | 0           |
| 63652452 | DLYANTVLSGGTTMYPGIADR      | Deamidation (NQ)                | PREDICTED: similar to cytoplasmic beta-actin [Mus musculus]                                      | 2216.0479 | 74.86  | 0           |
| 6671509  | DLYANTVLSGGTTMYPGIADR      | Oxidation (M)                   | actin, beta, cytoplasmic [Mus musculus]                                                          | 2231.0754 | 68.64  | 0.756442869 |
| 63652452 | DLYANTVLSGGTTMYPGIADR      | Oxidation (M)                   | PREDICTED: similar to cytoplasmic beta-actin [Mus musculus]                                      | 2231.0754 | 68.64  | 0.756442869 |
| 29126205 | DMDLIDVNEAFAPQFLSVQK       |                                 | acetyl-Coenzyme A acyltransferase 2 (mitochondrial 3-oxoacyl-Coenzyme A thiolase) [Mus musculus] | 2280.1304 | 74.43  | 0           |
| 20137006 | DMFQETMEAMR                |                                 | myosin, heavy polypeptide 9, non-muscle [Mus musculus]                                           | 1388.5658 | 32.15  | 0.638472024 |
| 6680836  | DMHGDSEYNMFGPDICGPGTK      |                                 | calreticulin [Mus musculus]                                                                      | 2384.0085 | 107.93 | 0.373600138 |
| 6677799  | DMILPEMVGSMVGVYNGK         |                                 | ribosomal protein S15 [Mus musculus]                                                             | 2053.0198 | 74.48  | 0           |
| 6677799  | DMILPEMVGSMVGVYNGK         | 2 Oxidation (M)                 | ribosomal protein S15 [Mus musculus]                                                             | 2085.0063 | 26.82  | 0           |
| 31560613 | DMLEASILDITYLQK            |                                 | chaperonin subunit 8 (theta) [Mus musculus]                                                      | 1568.7792 | 38.03  | 0           |
| 6755626  | DMLYQVLAEEPSVR             |                                 | sepiapterin reductase [Mus musculus]                                                             | 1720.8572 | 32.46  | 0.551862017 |
| 19527028 | DMNQFGEQEQAQ               |                                 | high density lipoprotein binding protein [Mus musculus]                                          | 1353.5804 | 39.37  | 0.86818138  |
| 21450277 | DMTSEELDDILR               |                                 | Na <sup>+</sup> /K <sup>+</sup> -ATPase alpha 1 subunit [Mus musculus]                           | 1436.6598 | 79.08  | 0           |
| 21450277 | DMTSEELDDILR               | Oxidation (M)                   | Na <sup>+</sup> /K <sup>+</sup> -ATPase alpha 1 subunit [Mus musculus]                           | 1452.6427 | 47.49  | 0           |
| 8567336  | DMVTQASPYLFEATGK           |                                 | chloride channel calcium activated 3 [Mus musculus]                                              | 1757.8508 | 88.54  | 0           |
| 8567336  | DNCVFPDPHQNEK              |                                 | chloride channel calcium activated 3 [Mus musculus]                                              | 1641.7303 | 79.63  | 0           |
| 6681219  | DNFTAIPGTINGVEER           |                                 | dihydropyrimidinase-like 3 [Mus musculus]                                                        | 1748.8158 | 70.37  | 3.842337675 |
| 40254595 | DNFTLIPEGTNGTEER           |                                 | dihydropyrimidinase-like 2 [Mus musculus]                                                        | 1792.8203 | 55.28  | 0.18094436  |
| 63746482 | DNGNGTYSCSYVPR             |                                 | PREDICTED: filamin, alpha [Mus musculus]                                                         | 1532.649  | 76.97  | 0.171905459 |
| 63746482 | DNGNGTYSCSYVPR             | Deamidation (NQ)                | PREDICTED: filamin, alpha [Mus musculus]                                                         | 1533.6532 | 60.42  | 0           |
| 31981722 | DNHLLGTFDLTGIPPAPR         |                                 | heat shock 70kD protein 5 (glucose-regulated protein) [Mus musculus]                             | 1934.0098 | 47.71  | 0.311290004 |
| 21361209 | DNIQGITKPAIR               |                                 | germinal histone H4 [Mus musculus]                                                               | 1325.7526 | 87.17  | 0.224192357 |
| 31982755 | DNLAEDIMR                  |                                 | vimentin [Mus musculus]                                                                          | 1076.505  | 46.81  | 0           |
| 30911099 | DNLEFFLTLNLGK              |                                 | fatty acid synthase [Mus musculus]                                                               | 1410.7246 | 41.72  | 0.600585422 |
| 33563250 | DNLIDDLQR                  |                                 | desmin [Mus musculus]                                                                            | 1101.5533 | 56.14  | 0.1432097   |
| 29789080 | DNNQFASASLDR               |                                 | coatamer protein complex, subunit beta 2 (beta prime) [Mus musculus]                             | 1337.6113 | 86.34  | 0.330017526 |
| 6753304  | DNQSGSLLFIGR               |                                 | serine (or cysteine) proteinase inhibitor, clade H, member 1 [Mus musculus]                      | 1306.6736 | 76.54  | 0.433963172 |
| 23621467 | DNTINLIHTFR                |                                 | PREDICTED: actin related protein 2/3 complex, subunit 2 [Mus musculus]                           | 1343.7034 | 34.32  | 2.314265239 |
| 34328278 | DNVDDPTGNFR                |                                 | lectin, mannose-binding 2 [Mus musculus]                                                         | 1249.5461 | 60.11  | 0           |
| 31791057 | DNVEGFNCER                 |                                 | laminin, gamma 1 [Mus musculus]                                                                  | 1182.4924 | 23.22  | 0           |
| 6679891  | DPAEGNGAQPEATPGDGDKPEETQEK |                                 | alpha glucosidase 2 alpha neutral subunit [Mus musculus]                                         | 2667.1626 | 52.85  | 0.65371883  |
| 6679891  | DPAEGNGAQPEATPGDGDKPEETQEK | Deamidation (NQ)                | alpha glucosidase 2 alpha neutral subunit [Mus musculus]                                         | 2668.1582 | 24.07  | 0           |
| 28916693 | DPDQTDGPGGLYLSSHIANVER     |                                 | gelsolin [Mus musculus]                                                                          | 2341.1042 | 41.9   | 0.58180148  |
| 6680502  | DPGDVVPVQQR                |                                 | integral membrane protein 2B [Mus musculus]                                                      | 1138.5798 | 27.92  | 0           |
| 9055370  | DPIVNVVYSVNGER             |                                 | eukaryotic translation initiation factor 3, subunit 2 (beta) [Mus musculus]                      | 1647.8145 | 27.35  | 1.334246844 |
| 31543942 | DPNASPGDAGEQAIR            |                                 | vinculin [Mus musculus]                                                                          | 1497.6973 | 76.11  | 0           |
| 31982437 | DPQLVPILIDAAR              |                                 | NAD(P) dependent steroid dehydrogenase-like [Mus musculus]                                       | 1420.8087 | 44.44  | 0.647469744 |
| 31980794 | DPTSLFFPESELSIR            |                                 | solute carrier family 39 (metal ion transporter), member 11 [Mus musculus]                       | 1703.8815 | 32.22  | 0           |
| 63589703 | DPVQLNLLYVQAR              |                                 | PREDICTED: talin 2 [Mus musculus]                                                                | 1528.8522 | 66.69  | 0           |
| 6755809  | DPVQLNLLYVQAR              |                                 | talin 1 [Mus musculus]                                                                           | 1528.8522 | 66.69  | 0           |
| 31560607 | DPVTGIEYWIK                |                                 | cathepsin C preproprotein [Mus musculus]                                                         | 1433.7784 | 35.95  | 0.835928145 |
| 51768600 | DQAPSEAELEER               |                                 | PREDICTED: LIM domain only 7 [Mus musculus]                                                      | 1244.5776 | 40.85  | 0.603205461 |
| 63481281 | DQDVEPGAPSMGAK             |                                 | PREDICTED: glutamyl-prolyl-tRNA synthetase [Mus musculus]                                        | 1401.6324 | 53.93  | 1.128639537 |
| 63481281 | DQDVEPGAPSMGAK             | Oxidation (M)                   | PREDICTED: glutamyl-prolyl-tRNA synthetase [Mus musculus]                                        | 1417.6162 | 33.15  | 0.288029277 |
| 31980648 | DQEGQDVLFLIDNIFR           |                                 | ATP synthase, H <sup>+</sup> transporting mitochondrial F1 complex, beta subunit [Mus musculus]  | 1921.9673 | 91.75  | 0.321427718 |
| 63474405 | DQEPGAFIIR                 |                                 | PREDICTED: tensin [Mus musculus]                                                                 | 1145.5968 | 36.15  | 0           |
| 31542143 | DQFPEVYVPTVFENYVADIEVDGK   |                                 | ras homolog gene family, member A [Mus musculus]                                                 | 2773.3411 | 55.1   | 0           |
| 33620739 | DQGTIEDYVEGLR              |                                 | myosin, light polypeptide 6, alkali, smooth muscle and non-muscle [Mus musculus]                 | 1544.6908 | 61.44  | 0.198131753 |
| 21450625 | DQIYDIFQK                  |                                 | eukaryotic translation initiation factor 4A1 [Mus musculus]                                      | 1169.5851 | 52.14  | 0.989463265 |
| 6754524  | DQLIVNLLK                  |                                 | lactate dehydrogenase 1, A chain [Mus musculus]                                                  | 1055.6418 | 60.55  | 0.402026002 |

|          |                         |                  |                                                                                                     |           |        |             |
|----------|-------------------------|------------------|-----------------------------------------------------------------------------------------------------|-----------|--------|-------------|
| 8392847  | DQLQTFSEEHPVLLTEAPLNPR  |                  | ARP1 actin-related protein 1 homolog A [Mus musculus]                                               | 2534.2805 | 53.17  | 0.276491653 |
| 6754556  | DQMQQQLSDYEQLLDVK       |                  | lamin B1 [Mus musculus]                                                                             | 2080.9978 | 57.36  | 0.79599065  |
| 6754556  | DQMQQQLSDYEQLLDVK       | Oxidation (M)    | lamin B1 [Mus musculus]                                                                             | 2096.9863 | 60.7   | 0           |
| 6753824  | DQPFTILYR               |                  | fibulin 5 [Mus musculus]                                                                            | 1152.6066 | 34.15  | 0.267463213 |
| 27370516 | DQTNDQVTIDSALATQK       |                  | isocitrate dehydrogenase 2 (NADP+), mitochondrial [Mus musculus]                                    | 1847.8972 | 81.34  | 0.290622864 |
| 6754254  | DQVANSAFVER             |                  | heat shock protein 1, alpha [Mus musculus]                                                          | 1235.6052 | 78.78  | 0.832932106 |
| 51771441 | DQVANSAFVER             |                  | PREDICTED: similar to heat shock protein 1, alpha [Mus musculus]                                    | 1235.6052 | 78.78  | 0.832932106 |
| 63481281 | DQVDSAVQELLQLK          |                  | PREDICTED: glutamyl-prolyl-tRNA synthetase [Mus musculus]                                           | 1585.8207 | 24.7   | 1.321453528 |
| 20330802 | DQYELLCLDNTR            |                  | transferrin [Mus musculus]                                                                          | 1482.6924 | 26.85  | 0           |
| 31982122 | DREDEEEDEEEETDPK        |                  | phospholipase C, beta 3 [Mus musculus]                                                              | 2223.8608 | 44.16  | 0.799099468 |
| 23956222 | DREVGIPPEQSLETAK        |                  | ARP3 actin-related protein 3 homolog [Mus musculus]                                                 | 1768.9114 | 36.01  | 0           |
| 6678331  | DSATISLDPPEEIQYPVK      |                  | transglutaminase 3, E polypeptide [Mus musculus]                                                    | 2033.9894 | 125.71 | 0           |
| 6679058  | DSGQFTDFELPEQR          |                  | nidogen 2 [Mus musculus]                                                                            | 1668.7528 | 26.3   | 0           |
| 33859811 | DSIFSNLIGQLDYK          |                  | hydroxyacyl-Coenzyme A dehydrogenase/3-ketoacyl-Coenzyme A thiolase/enoyl-Coenzyme A hydratase (tri | 1612.8207 | 112.7  | 0.314128587 |
| 33859811 | DSIFSNLIGQLDYK          | Deamidation (NQ) | hydroxyacyl-Coenzyme A dehydrogenase/3-ketoacyl-Coenzyme A thiolase/enoyl-Coenzyme A hydratase (tri | 1613.8182 | 41.18  | 0           |
| 6753266  | DSILSPEQLAQLR           |                  | carbonic anhydrase 1 [Mus musculus]                                                                 | 1556.8298 | 77.67  | 0.898506884 |
| 6755040  | DSLLQDGEFTMDLR          |                  | profilin 1 [Mus musculus]                                                                           | 1639.7432 | 43.64  | 0.523614495 |
| 6678682  | DSNNLCLHFNPR            |                  | lectin, galactose binding, soluble 1 [Mus musculus]                                                 | 1429.6688 | 63.77  | 0           |
| 28478945 | DSPGETDAFGNSEGK         |                  | PREDICTED: glutaminase [Mus musculus]                                                               | 1510.6344 | 33.04  | 0.335941634 |
| 41322904 | DSQDAGGFGPEDR           |                  | plectin 1 isoform 1 [Mus musculus]                                                                  | 1350.561  | 45.87  | 0           |
| 28916693 | DSQEEEKTEALTSAK         |                  | gelsolin [Mus musculus]                                                                             | 1665.7814 | 65.69  | 0.161771411 |
| 7305295  | DSSITGELEK              |                  | myosin, heavy polypeptide 11, smooth muscle [Mus musculus]                                          | 1078.533  | 43.02  | 0           |
| 9055338  | DSTLIMQLLR              |                  | stratifin [Mus musculus]                                                                            | 1189.6642 | 56.65  | 0           |
| 31543974 | DSTLIMQLLR              |                  | tyrosine 3-monooxygenase/tryptophan 5-monooxygenase activation protein, beta polypeptide [Mus muscu | 1189.6642 | 56.65  | 0           |
| 31981925 | DSTLIMQLLR              |                  | tyrosine 3-monooxygenase/tryptophan 5-monooxygenase activation protein, epsilon polypeptide [Mus mu | 1189.6642 | 56.65  | 0           |
| 6756037  | DSTLIMQLLR              |                  | tyrosine 3-monooxygenase/tryptophan 5-monooxygenase activation protein, eta polypeptide [Mus muscu  | 1189.6642 | 56.65  | 0           |
| 6756039  | DSTLIMQLLR              |                  | tyrosine 3-monooxygenase/tryptophan 5-monooxygenase activation protein, theta polypeptide [Mus musc | 1189.6642 | 56.65  | 0           |
| 6756041  | DSTLIMQLLR              |                  | tyrosine 3-monooxygenase/tryptophan 5-monooxygenase activation protein, zeta polypeptide [Mus muscu | 1189.6642 | 56.65  | 0           |
| 30794518 | DSVLTWLLK               |                  | kinesin family member 13A [Mus musculus]                                                            | 1074.6117 | 34.74  | 0.213384767 |
| 23821040 | DSVLTWLLK               |                  | kinesin family member 1C [Mus musculus]                                                             | 1074.6117 | 34.74  | 0.213384767 |
| 63664018 | DSVLTWLLK               |                  | PREDICTED: kinesin family member 13B [Mus musculus]                                                 | 1074.6117 | 34.74  | 0.213384767 |
| 63492438 | DSVLTWLLK               |                  | PREDICTED: kinesin family member 16B [Mus musculus]                                                 | 1074.6117 | 34.74  | 0.213384767 |
| 63492281 | DSVLTWLLK               |                  | PREDICTED: similar to mKIAA1300 protein [Mus musculus]                                              | 1074.6117 | 34.74  | 0.213384767 |
| 12331400 | DSYIEVLLPLGTDPELR       |                  | acyl-Coenzyme A thioesterase 3, mitochondrial [Mus musculus]                                        | 1930.0184 | 40.85  | 0           |
| 6671507  | DSYVGDEAQS              |                  | actin, alpha 2, smooth muscle, aorta [Mus musculus]                                                 | 1198.5284 | 47.02  | 0.25246971  |
| 6671509  | DSYVGDEAQS              |                  | actin, beta, cytoplasmic [Mus musculus]                                                             | 1198.5284 | 47.02  | 0.25246971  |
| 6753374  | DTANWLEINPETGAIFTR      |                  | cadherin 1 [Mus musculus]                                                                           | 2048.0083 | 62.18  | 0.490244891 |
| 9790141  | DTDIVDEAIYFK            |                  | actin related protein 2/3 complex, subunit 3 [Mus musculus]                                         | 1591.7821 | 32.88  | 0.68216552  |
| 54261793 | DTEGMDEIDLAEMELR        |                  | plasma membrane calcium ATPase 4 [Mus musculus]                                                     | 1866.8384 | 56.58  | 0           |
| 51491845 | DTELAEELLQWFLQEEK       |                  | clathrin, heavy polypeptide (Hc) [Mus musculus]                                                     | 2121.0381 | 44.9   | 0.424372474 |
| 41322904 | DTHDQLSEPSEVR           |                  | plectin 1 isoform 1 [Mus musculus]                                                                  | 1512.6941 | 76.83  | 0.384725381 |
| 9790067  | DTNGENIAESLVAEGLATR     |                  | staphylococcal nuclease domain containing 1 [Mus musculus]                                          | 1959.9622 | 131.65 | 0.486885417 |
| 6755142  | DTNGSQFFITVK            |                  | peptidylprolyl isomerase B [Mus musculus]                                                           | 1457.7203 | 78.58  | 0           |
| 6680163  | DTPGFIVNR               |                  | L-3-hydroxyacyl-Coenzyme A dehydrogenase, short chain [Mus musculus]                                | 1018.5327 | 50.94  | 0           |
| 42476274 | DTPQEDWLVSVLPEGSR       |                  | X-prolyl aminopeptidase (aminopeptidase P) 1, soluble [Mus musculus]                                | 2028.9929 | 64.1   | 0.667584326 |
| 33859811 | DTTASAVAVGLR            |                  | hydroxyacyl-Coenzyme A dehydrogenase/3-ketoacyl-Coenzyme A thiolase/enoyl-Coenzyme A hydratase (tri | 1160.6195 | 54.37  | 5.875856277 |
| 7305295  | DVASLGSQLQDQTQELLQEETR  |                  | myosin, heavy polypeptide 11, smooth muscle [Mus musculus]                                          | 2360.1631 | 189.53 | 0.106200249 |
| 29150272 | DVAWAPSIGLPTSTIASCSDQGR |                  | SEC13 related gene [Mus musculus]                                                                   | 2332.1248 | 101.08 | 0.380026602 |
| 63556656 | DVCGLCGNFNGNPPDDDLALK   |                  | PREDICTED: RIKEN cDNA A430096B05 gene [Mus musculus]                                                | 2079.9175 | 107.88 | 0           |
| 30023842 | DVDLEFLAK               |                  | valosin containing protein [Mus musculus]                                                           | 1049.549  | 28.57  | 0           |
| 6678726  | DVDPDVAYSSIPYEK         |                  | leukotriene A4 hydrolase [Mus musculus]                                                             | 1697.8    | 44.57  | 0.383952607 |
| 63489759 | DVEDEETWIR              |                  | PREDICTED: spectrin alpha 2 [Mus musculus]                                                          | 1291.5834 | 70.89  | 0.073953157 |
| 30348966 | DVEDEILWVGER            |                  | spectrin beta 2 isoform 1 [Mus musculus]                                                            | 1459.7086 | 58.1   | 0           |
| 7106421  | DVEDEILWVGER            |                  | spectrin beta 2 isoform 2 [Mus musculus]                                                            | 1459.7086 | 58.1   | 0           |
| 33859506 | DVFLGTFLYEYSR           |                  | albumin 1 [Mus musculus]                                                                            | 1609.7904 | 67.69  | 0.071070408 |
| 6679491  | DVFSPIGER               |                  | aminopeptidase puromycin sensitive [Mus musculus]                                                   | 1019.5123 | 37.22  | 0.360155969 |
| 18079339 | DVGGIVLANACGPCIGQWDR    |                  | aconitase 2, mitochondrial [Mus musculus]                                                           | 2043.9803 | 23.97  | 0.35791874  |
| 7305515  | DVGGNNGSGNGGGAAFSQTR    |                  | trans-acting transcription factor 1 [Mus musculus]                                                  | 1879.8364 | 37.52  | 0.565842736 |
| 7305515  | DVGGNNGSGNGGGAAFSQTR    | Deamidation (NQ) | trans-acting transcription factor 1 [Mus musculus]                                                  | 1880.8301 | 32.89  | 0           |
| 42734399 | DVHDSYALLVAESWR         |                  | desmuslin isoform H [Mus musculus]                                                                  | 1760.8715 | 48.35  | 0           |

|          |                        |                                                                                                     |           |        |             |
|----------|------------------------|-----------------------------------------------------------------------------------------------------|-----------|--------|-------------|
| 46559834 | DVHDSYALLVAESWR        | desmuslin isoform M [Mus musculus]                                                                  | 1760.8715 | 48.35  | 0           |
| 6681115  | DVISFFTTsver           | cytochrome P450, family 3, subfamily a, polypeptide 13 [Mus musculus]                               | 1400.7068 | 41.02  | 0           |
| 46575916 | DVLLLGNDYIVPR          | hepatic nuclear factor 4, alpha [Mus musculus]                                                      | 1486.8169 | 31.63  | 0           |
| 29789383 | DVLLPWYNAYR            | isoleucine-tRNA synthetase [Mus musculus]                                                           | 1409.7279 | 36.89  | 0.437135936 |
| 6680047  | DVLSVAFSSDNR           | guanine nucleotide binding protein (G protein), beta polypeptide 2 like 1 [Mus musculus]            | 1309.6367 | 72.81  | 0.576501982 |
| 27804325 | DVPALEIHTFLER          | monoamine oxidase A [Mus musculus]                                                                  | 1640.8658 | 36.3   | 0.196125842 |
| 63664018 | DVPTGGIFQLR            | PREDICTED: kinesin family member 13B [Mus musculus]                                                 | 1202.651  | 22.91  | 0           |
| 38372907 | DVQEIFR                | DEAD (Asp-Glu-Ala-Asp) box polypeptide 39 [Mus musculus]                                            | 906.4734  | 31.25  | 0.429539157 |
| 9790069  | DVQEIFR                | HLA-B-associated transcript 1A [Mus musculus]                                                       | 906.4734  | 31.25  | 0.429539157 |
| 7304885  | DVQELYAAGENR           | annexin A11 [Mus musculus]                                                                          | 1364.6436 | 59.04  | 0           |
| 63489759 | DVTGAEALLER            | PREDICTED: spectrin alpha 2 [Mus musculus]                                                          | 1173.5925 | 28.31  | 0           |
| 28173550 | DVTNNVHYENYR           | cell division cycle 10 homolog [Mus musculus]                                                       | 1523.6906 | 73.31  | 0.307305237 |
| 21704100 | DVVVDYIIFGTVIQEVK      | hydroxyacyl-Coenzyme A dehydrogenase/3-ketoacyl-Coenzyme A thiolase/enoyl-Coenzyme A hydratase (tri | 1837.9929 | 67.14  | 0.554907281 |
| 63476037 | DVVFLIDGSR             | PREDICTED: procollagen, type VI, alpha 3 [Mus musculus]                                             | 1120.6017 | 33.2   | 0           |
| 24429590 | DVVFLAYPEVR            | DEAH (Asp-Glu-Ala-His) box polypeptide 9 [Mus musculus]                                             | 1160.6307 | 25.59  | 1.449664093 |
| 19526822 | DVVVSYYNFYK            | sulfotransferase family 1A, phenol-preferring, member 1 [Mus musculus]                              | 1396.6649 | 47.06  | 0.642547931 |
| 20532346 | DVYEDELVPVFETVGR       | hypothetical protein LOC245945 [Mus musculus]                                                       | 1866.9169 | 90.24  | 0.550223219 |
| 6754632  | DVYIVQDLMETDLYK        | mitogen activated protein kinase 1 [Mus musculus]                                                   | 1844.9036 | 40.38  | 0           |
| 21489933 | DVYIVQDLMETDLYK        | mitogen activated protein kinase 3 [Mus musculus]                                                   | 1844.9036 | 40.38  | 0           |
| 31542159 | DWGSQSDTLR             | ATPase, Ca++ transporting, ubiquitous [Mus musculus]                                                | 1093.495  | 48.63  | 0           |
| 33859560 | DWNVDLIPK              | guanosine diphosphate (GDP) dissociation inhibitor 1 [Mus musculus]                                 | 1099.5737 | 34.35  | 0           |
| 56119103 | DWNVDLIPK              | guanosine diphosphate (GDP) dissociation inhibitor 3 [Mus musculus]                                 | 1099.5737 | 34.35  | 0           |
| 6681157  | DWVLNEFK               | DEAD (Asp-Glu-Ala-Asp) box polypeptide 5 [Mus musculus]                                             | 1050.5254 | 40.32  | 0           |
| 40068493 | DWVLNEFR               | DEAD box polypeptide 17 isoform 1 [Mus musculus]                                                    | 1078.5364 | 24.96  | 0.392682102 |
| 51467513 | DXSHYFKTIQDLR          | PREDICTED: similar to Keratin, type I cytoskeletal 18 (Cytokeratin 18) (K18) (CK 18) [Homo sapiens] | 1708.8529 | 34.16  | 0           |
| 7949053  | DYFEEYQK               | heterogeneous nuclear ribonucleoprotein A2/B1 isoform 1 [Mus musculus]                              | 1050.4406 | 45.07  | 0.464433121 |
| 6754220  | DYFEQYQK               | heterogeneous nuclear ribonucleoprotein A1 [Mus musculus]                                           | 1049.4625 | 31.72  | 0.421342723 |
| 63663965 | DYFEQYQK               | PREDICTED: similar to Heterogeneous nuclear ribonucleoprotein A1 (Helix-destabilizing protein) (Sin | 1049.4625 | 31.72  | 0.421342723 |
| 27369998 | DYFLFNPVTIDIEIIR       | calcium-binding transporter [Mus musculus]                                                          | 1984.011  | 50.92  | 0.369311759 |
| 6680690  | DYGVLLSAGIALR          | peroxiredoxin 3 [Mus musculus]                                                                      | 1476.8113 | 61.72  | 0           |
| 7949999  | DYGVYLEDSEHTLR         | peroxiredoxin 4 [Mus musculus]                                                                      | 1624.7649 | 47.97  | 0           |
| 13384736 | DYIPVDQEELR            | dynein, cytoplasmic, heavy chain 1 [Mus musculus]                                                   | 1376.6721 | 51.51  | 0           |
| 13385942 | DYIWNTLNSGR            | citrate synthase [Mus musculus]                                                                     | 1338.645  | 58.45  | 0.550564301 |
| 21426889 | DYLHYIR                | ribosomal protein S11 [Mus musculus]                                                                | 979.5042  | 23.16  | 0           |
| 6753262  | DYLLCDYNR              | capping protein (actin filament) muscle Z-line, beta [Mus musculus]                                 | 1174.5258 | 37.34  | 0.402197816 |
| 7304887  | DYPGFSPSVDAAIR         | annexin A3 [Mus musculus]                                                                           | 1623.7621 | 117.19 | 0.213207071 |
| 7242187  | DYTGEDVTPENFLAVLR      | legumain [Mus musculus]                                                                             | 1938.9449 | 22.16  | 0.490451333 |
| 14149756 | DYTYEELLNR             | eukaryotic translation initiation factor 2, subunit 2 (beta) [Mus musculus]                         | 1315.6191 | 49.97  | 0.541182022 |
| 9790067  | DYVPPTANLDQK           | staphylococcal nuclease domain containing 1 [Mus musculus]                                          | 1360.6676 | 29.18  | 0           |
| 6753086  | EAAGEGPVLYEDPPDQK      | apurinic/aprimidinic endonuclease 1 [Mus musculus]                                                  | 1814.8427 | 31.91  | 0           |
| 31982722 | EAAGTTAAAGTGGTTEQPPR   | squamous cell carcinoma antigen recognized by T-cells 1 [Mus musculus]                              | 1843.885  | 54.82  | 0.489648251 |
| 63664073 | EAAPDTGAEPSPEDSDPTYSSK | PREDICTED: p30 DBC protein [Mus musculus]                                                           | 2250.9595 | 63.98  | 0.650296489 |
| 42415475 | EADDIVNWLK             | prolyl 4-hydroxylase, beta polypeptide [Mus musculus]                                               | 1202.6029 | 53.1   | 0.491535045 |
| 31981810 | EADIQNFTSFISK          | dodecenoyl-Coenzyme A delta isomerase (3,2 trans-enoyl-Coenzyme A isomerase) [Mus musculus]         | 1499.7333 | 23.51  | 0           |
| 15426055 | EELLEPLMPAIR           | coatamer protein complex, subunit beta 1 [Mus musculus]                                             | 1481.7936 | 28.64  | 0.348671999 |
| 47578123 | EAEYFELPELVR           | potassium channel tetramerisation domain containing 12 [Mus musculus]                               | 1494.7556 | 60.83  | 0           |
| 6755911  | EAFQEALAAAGDK          | thioredoxin 1 [Mus musculus]                                                                        | 1320.6403 | 65.08  | 0.407842152 |
| 29789080 | EAFVVEEWWK             | coatamer protein complex, subunit beta 2 (beta prime) [Mus musculus]                                | 1235.6293 | 53.88  | 0.529612328 |
| 34328400 | EAGDVCYADVYR           | splicing factor, arginine/serine-rich 1 (ASF/SF2) [Mus musculus]                                    | 1360.6099 | 40.7   | 0.683240545 |
| 18152793 | EAINQGMDEELER          | pyruvate dehydrogenase (lipoamide) beta [Mus musculus]                                              | 1533.6893 | 30.31  | 1.860962697 |
| 6679599  | EAINVEQAFQTIAR         | RAB7, member RAS oncogene family [Mus musculus]                                                     | 1589.8304 | 56.65  | 0           |
| 21311915 | EALGGQAEFFSGR          | cytochrome P450, family 2, subfamily s, polypeptide 1 [Mus musculus]                                | 1350.6355 | 24.7   | 0           |
| 30409988 | EALNVFGDDYATEDGTGVR    | galactose-4-epimerase, UDP [Mus musculus]                                                           | 2028.9174 | 59.85  | 0.370567334 |
| 15808988 | EALTYDGALLGDR          | Williams-Beuren syndrome chromosome region 1 homolog [Mus musculus]                                 | 1393.6914 | 55.65  | 0           |
| 31980674 | EANLCKKLR              | rhopilin, Rho GTPase binding protein 2 [Mus musculus]                                               | 1075.5739 | 25.05  | 0           |
| 31981515 | EANNFLWPFK             | ribosomal protein L7 [Mus musculus]                                                                 | 1265.6306 | 43.35  | 0.380088822 |
| 29336026 | EAQAGLAEAQEDLEAER      | nonmuscle myosin heavy chain [Mus musculus]                                                         | 1829.8489 | 83.03  | 0.715246585 |
| 33468887 | EASDPQPEDVDGGLK        | capping protein (actin filament) muscle Z-line, alpha 1 [Mus musculus]                              | 1556.6925 | 35.16  | 0           |
| 33859520 | EASIDYDLSYFTGSK        | caspase 8 [Mus musculus]                                                                            | 1681.7911 | 62.03  | 1.08969834  |
| 31980645 | EASVTPSNLWGGQGLLGSIR   | golgi reassembly stacking protein 2 [Mus musculus]                                                  | 2141.1387 | 28.15  | 0.40154196  |

Deamidation (NQ)

|          |                          |                  |                                                                                                  |           |        |             |
|----------|--------------------------|------------------|--------------------------------------------------------------------------------------------------|-----------|--------|-------------|
| 31981562 | EATESFASDPILYRPVAVALDTK  |                  | pyruvate kinase 3 [Mus musculus]                                                                 | 2493.2856 | 35.93  | 0.46708163  |
| 6679687  | EATNPPIQEKKPK            |                  | glucose regulated protein [Mus musculus]                                                         | 1593.8464 | 63.4   | 0.371549558 |
| 23956084 | EATQAVLDKPKETLSSDASTR    |                  | acyl-Coenzyme A dehydrogenase, very long chain [Mus musculus]                                    | 2119.0613 | 68.87  | 0.754061767 |
| 63746482 | EATTEFSVDAR              |                  | PREDICTED: filamin, alpha [Mus musculus]                                                         | 1225.5706 | 70.61  | 0.13859516  |
| 12963539 | EAVLIDPVLETahr           |                  | ETHE1 protein [Mus musculus]                                                                     | 1562.8486 | 46.24  | 0           |
| 63594458 | EAYFWLR                  |                  | PREDICTED: source of immunodominant MHC-associated peptides [Mus musculus]                       | 984.4965  | 35.1   | 0.380397436 |
| 6680748  | EAYPGDVFYLHSR            |                  | ATP synthase, H+ transporting, mitochondrial F1 complex, alpha subunit, isoform 1 [Mus musculus] | 1553.7405 | 64.57  | 0.346443328 |
| 27532959 | ECDVLPDDTVSTLYNLR        |                  | aldehyde dehydrogenase 1 family, member L1 [Mus musculus]                                        | 1839.8547 | 43.13  | 0.40163328  |
| 63556656 | ECGILADPEGPFR            |                  | PREDICTED: RIKEN cDNA A430096B05 gene [Mus musculus]                                             | 1403.6613 | 30.7   | 0.125104535 |
| 6677805  | ECLPLIIFLR               |                  | ribosomal protein S4, X-linked [Mus musculus]                                                    | 1216.7172 | 29.6   | 0.471953985 |
| 63562740 | EDALMVELDSR              |                  | PREDICTED: similar to secreted gel-forming mucin [Mus musculus]                                  | 1277.6078 | 77.05  | 0           |
| 30023842 | EDEEESLNEVGYDDIGGCR      |                  | valosin containing protein [Mus musculus]                                                        | 2128.8655 | 130.62 | 0.476096149 |
| 6756033  | EDGNEEDKENQGGDETQGGQPPQR |                  | nuclease sensitive element binding protein 1 [Mus musculus]                                      | 2628.106  | 171.74 | 0.440943411 |
| 7710014  | EDGSEVGVGGAAQVTGSNTR     |                  | cullin 3 [Mus musculus]                                                                          | 1819.847  | 56.82  | 0.625057289 |
| 31982275 | EDIYAVEIVGATR            |                  | heat shock protein 4 [Mus musculus]                                                              | 1492.7675 | 59.58  | 0           |
| 20330802 | EDLIWEILK                |                  | transferrin [Mus musculus]                                                                       | 1158.6398 | 46.16  | 0           |
| 50355692 | EDLQELNDR                |                  | lamin A isoform A [Mus musculus]                                                                 | 1131.5253 | 47.75  | 0           |
| 33859482 | EDLYLKPQR                |                  | eukaryotic translation elongation factor 2 [Mus musculus]                                        | 1274.7098 | 57.44  | 0.835872627 |
| 20070418 | EDNEGVYNGSWGGR           |                  | aldehyde dehydrogenase family 7, member A1 [Mus musculus]                                        | 1539.6442 | 33.45  | 0           |
| 15426055 | EDQFQLSLLAAMGNTQR        |                  | coatamer protein complex, subunit beta 1 [Mus musculus]                                          | 1921.9791 | 37.55  | 0.625341246 |
| 33598964 | EDQSILCTGEGGAGK          |                  | myosin heavy chain 10, non-muscle [Mus musculus]                                                 | 1494.6821 | 81.46  | 0           |
| 7305295  | EDQSILCTGEGGAGK          |                  | myosin, heavy polypeptide 11, smooth muscle [Mus musculus]                                       | 1494.6821 | 81.46  | 0           |
| 20137006 | EDQSILCTGEGGAGK          |                  | myosin, heavy polypeptide 9, non-muscle [Mus musculus]                                           | 1494.6821 | 81.46  | 0           |
| 29336026 | EDQSILCTGEGGAGK          |                  | nonmuscle myosin heavy chain [Mus musculus]                                                      | 1494.6821 | 81.46  | 0           |
| 6754254  | EDQTEYLEER               |                  | heat shock protein 1, alpha [Mus musculus]                                                       | 1311.5702 | 77.16  | 0.62677122  |
| 40556608 | EDQTEYLEER               |                  | heat shock protein 1, beta [Mus musculus]                                                        | 1311.5702 | 77.16  | 0.62677122  |
| 34996495 | EDQVQLMNTIFSK            |                  | ribophorin II [Mus musculus]                                                                     | 1665.85   | 46.46  | 0           |
| 29293809 | EEADEYVDIGALNGIFVLGR     | Deamidation (NQ) | ATP citrate lyase [Mus musculus]                                                                 | 2181.0916 | 22.21  | 0           |
| 33563250 | EEAENNLAAFR              |                  | desmin [Mus musculus]                                                                            | 1263.6011 | 78.51  | 0.150813444 |
| 31982755 | EEAESTLQSFR              |                  | vimentin [Mus musculus]                                                                          | 1296.6102 | 65.08  | 0.297668863 |
| 6755863  | EEASDYLELDTIK            |                  | tumor rejection antigen gp96 [Mus musculus]                                                      | 1525.7205 | 30.87  | 0           |
| 6755863  | EEEEAIQLDGLNASQIR        |                  | tumor rejection antigen gp96 [Mus musculus]                                                      | 1785.9003 | 32.79  | 0           |
| 30425112 | EEEEEEEEYEDEGSNLKR       |                  | hypothetical protein LOC109154 [Mus musculus]                                                    | 2113.8647 | 25.61  | 0.458016837 |
| 31982522 | EEGDSWVVLNGTK            |                  | acyl-Coenzyme A dehydrogenase, short chain [Mus musculus]                                        | 1334.6349 | 34.06  | 0           |
| 63504601 | EEGVDPREPR               |                  | PREDICTED: hypothetical protein XP_487763 [Mus musculus]                                         | 1086.5361 | 22.1   | 0           |
| 22208854 | EEGYDSVFSVVR             |                  | cytidine monophospho-N-acetylneuraminic acid synthetase [Mus musculus]                           | 1386.6549 | 74.5   | 0.313721219 |
| 6753036  | EEIFGPVMQILK             |                  | aldehyde dehydrogenase 2, mitochondrial [Mus musculus]                                           | 1403.7583 | 54.96  | 0           |
| 21312260 | EEIFGPVQPLFK             |                  | aldehyde dehydrogenase 1 family, member B1 [Mus musculus]                                        | 1403.7581 | 55.77  | 0           |
| 45544618 | EEIQPGDMVIIDQFIDR        |                  | methylthioadenosine phosphorylase [Mus musculus]                                                 | 2017.9872 | 24.1   | 0           |
| 7710042  | EEIQSSISGVTAAYNR         |                  | IQ motif containing GTPase activating protein 1 [Mus musculus]                                   | 1724.8501 | 45.88  | 0           |
| 7305295  | EELAEELASSLSGR           |                  | myosin, heavy polypeptide 11, smooth muscle [Mus musculus]                                       | 1490.7324 | 44.33  | 0           |
| 27777677 | EELGDEWLTPLDFLR          |                  | deoxyribose-phosphate aldolase-like [Mus musculus]                                               | 1719.834  | 33.21  | 0.624651713 |
| 22122535 | EELIGIAYNR               |                  | pleckstrin homology domain containing, family C (with FERM domain) member 1 [Mus musculus]       | 1177.6204 | 25.09  | 0           |
| 19527034 | EELSPASSGNNAVYDFFIGR     |                  | lamin B receptor [Mus musculus]                                                                  | 2058.9797 | 28.45  | 0.465025187 |
| 36031035 | EENAEQQALAAKR            | Deamidation (NQ) | chondroitin sulfate proteoglycan 6 [Mus musculus]                                                | 1458.7247 | 22.16  | 0           |
| 31560222 | EESGAVAAAASVPAQSTAR      |                  | PYD and CARD domain containing [Mus musculus]                                                    | 1772.8806 | 80.67  | 0.438795764 |
| 12584968 | EESGVPGPNSPPTNR          |                  | solute carrier family 29 (nucleoside transporters), member 1 [Mus musculus]                      | 1537.7291 | 43.66  | 0.263869151 |
| 55741703 | EESLLLFAMR               |                  | glutaminyl-tRNA synthetase [Mus musculus]                                                        | 1337.6827 | 26.91  | 0           |
| 7710042  | EEVQAGVDAANSAAQYQR       |                  | IQ motif containing GTPase activating protein 1 [Mus musculus]                                   | 2034.9487 | 132.99 | 0.247302983 |
| 13385680 | EEWDIEGLIR               |                  | 2,4-dienoyl CoA reductase 1, mitochondrial [Mus musculus]                                        | 1372.7151 | 45.96  | 0.444817852 |
| 20330802 | EEYNGYTGAFR              |                  | transferrin [Mus musculus]                                                                       | 1306.5771 | 42.59  | 0.473986205 |
| 21703832 | EEYSGVIEEFLATGEK         |                  | arginyl aminopeptidase (aminopeptidase B) [Mus musculus]                                         | 1800.8807 | 29.41  | 0.425121838 |
| 6679587  | EFADSLGIPFLETSK          |                  | RAB1, member RAS oncogene family [Mus musculus]                                                  | 1724.8723 | 86.14  | 0.320828264 |
| 21313162 | EFADSLGVPFLETSK          |                  | RAB1B, member RAS oncogene family [Mus musculus]                                                 | 1710.8572 | 48.78  | 0.695382773 |
| 31542159 | EFDDLSPQQR               |                  | ATPase, Ca++ transporting, ubiquitous [Mus musculus]                                             | 1363.6154 | 58.76  | 0.427775167 |
| 6806903  | EFDELSPAQR               |                  | ATPase, Ca++ transporting, cardiac muscle, slow twitch 2 [Mus musculus]                          | 1278.5946 | 68.45  | 0.462829046 |
| 21704156 | EFDPTITDGSLSGSPSR        |                  | caldesmon 1 [Mus musculus]                                                                       | 1678.798  | 24.2   | 0.295004147 |
| 51491880 | EFEEESKQPGVSEQQR         |                  | metastasis-associated protein 2 [Mus musculus]                                                   | 1906.8823 | 53.49  | 0.484945046 |
| 6755863  | EFEP LLNWMK              | Oxidation (M)    | tumor rejection antigen gp96 [Mus musculus]                                                      | 1322.6411 | 23.81  | 0.230771545 |
| 13385310 | EFFNFLPLSSQDPAPIR        |                  | propionyl Coenzyme A carboxylase, beta polypeptide [Mus musculus]                                | 1978.0089 | 37.24  | 0.245347798 |

|          |                             |               |                                                                                                     |           |        |             |
|----------|-----------------------------|---------------|-----------------------------------------------------------------------------------------------------|-----------|--------|-------------|
| 13242328 | EFNEDGALAVLQQFK             |               | NS1-associated protein 1 [Mus musculus]                                                             | 1708.8545 | 35.24  | 0           |
| 31980706 | EFQEQLSAR                   |               | methylcrotonoyl-Coenzyme A carboxylase 1 (alpha) [Mus musculus]                                     | 1236.5876 | 33.19  | 3.131146161 |
| 23956222 | EFSIDVGYER                  |               | ARP3 actin-related protein 3 homolog [Mus musculus]                                                 | 1214.5726 | 23.67  | 0.629978427 |
| 31982275 | EFSITDVVPYISLR              |               | heat shock protein 4 [Mus musculus]                                                                 | 1735.9237 | 63.26  | 0.490031747 |
| 6806903  | EFTLEFSR                    |               | ATPase, Ca++ transporting, cardiac muscle, slow twitch 2 [Mus musculus]                             | 1028.5051 | 49.83  | 0.448277188 |
| 36031132 | EFTLEFSR                    |               | ATPase, Ca++ transporting, fast twitch 1 [Mus musculus]                                             | 1028.5051 | 49.83  | 0.448277188 |
| 31542159 | EFTLEFSR                    |               | ATPase, Ca++ transporting, ubiquitous [Mus musculus]                                                | 1028.5051 | 49.83  | 0.448277188 |
| 6677991  | EGAQYLMQAAGLGR              |               | solute carrier family 12, member 2 [Mus musculus]                                                   | 1464.7223 | 34.26  | 0           |
| 21426821 | EGDVLTLLESER                |               | ribosomal protein S28 [Mus musculus]                                                                | 1360.7097 | 75.92  | 0.519855004 |
| 63594458 | EGDYFTQQGEFR                |               | PREDICTED: source of immunodominant MHC-associated peptides [Mus musculus]                          | 1476.6417 | 68.17  | 0.417671572 |
| 45387933 | EGETYDYVVAVVDPVTR           |               | UDP-glucose ceramide glucosyltransferase-like 1 [Mus musculus]                                      | 1911.9349 | 37.56  | 0           |
| 31560539 | EGGLGPLNIPLLADVTK           |               | peroxiredoxin 2 [Mus musculus]                                                                      | 1706.9573 | 29.68  | 0.373013493 |
| 29789191 | EGIDPAPYYWYTDQR             |               | asparaginyl-tRNA synthetase [Mus musculus]                                                          | 1873.8445 | 53.86  | 0.494325567 |
| 18152793 | EGIECEVINLR                 |               | pyruvate dehydrogenase (lipoamide) beta [Mus musculus]                                              | 1274.639  | 26.98  | 0           |
| 6754750  | EGILNDDIYCPPETAULLASYAVQSK  |               | moesin [Mus musculus]                                                                               | 2809.3911 | 30.1   | 0.597003605 |
| 33859482 | EGIPALDNFLDKL               |               | eukaryotic translation elongation factor 2 [Mus musculus]                                           | 1444.7697 | 87.31  | 0.628791012 |
| 59709449 | EGLLLWCQR                   |               | actinin alpha 2 [Mus musculus]                                                                      | 1117.5885 | 51.38  | 0.249466099 |
| 11230802 | EGLLLWCQR                   |               | actinin alpha 4 [Mus musculus]                                                                      | 1117.5885 | 51.38  | 0.249466099 |
| 6679439  | EGMNIVEAMER                 |               | peptidylprolyl isomerase A [Mus musculus]                                                           | 1278.5863 | 64.03  | 0           |
| 63650244 | EGMNIVEAMER                 |               | PREDICTED: similar to Peptidyl-prolyl cis-trans isomerase A (PPlase) (Rotamase) (Cyclophilin A) (Cy | 1278.5863 | 64.03  | 0           |
| 31981549 | EGNALFTFPNTPVK              |               | sulfide quinone reductase-like [Mus musculus]                                                       | 1534.7832 | 53.14  | 0.333362461 |
| 31980648 | EGNDLYHEMIESGVINLK          |               | ATP synthase, H+ transporting mitochondrial F1 complex, beta subunit [Mus musculus]                 | 2060.998  | 103.01 | 0.759062362 |
| 63746482 | EGSYSISVLYGEEVEPR           |               | PREDICTED: filamin, alpha [Mus musculus]                                                            | 1913.9132 | 109.03 | 0.100499809 |
| 31982186 | EGVVECSFVQSK                |               | malate dehydrogenase 2, NAD (mitochondrial) [Mus musculus]                                          | 1311.6199 | 48.2   | 0.280800861 |
| 18079339 | EGWPLDIR                    |               | aconitase 2, mitochondrial [Mus musculus]                                                           | 985.5128  | 42.77  | 0.230195995 |
| 31981690 | EIAEAYLGK                   |               | heat shock protein 8 [Mus musculus]                                                                 | 993.5202  | 32.35  | 0           |
| 63664182 | EIAEAYLGK                   |               | PREDICTED: similar to heat shock protein 8 [Mus musculus]                                           | 993.5202  | 32.35  | 0           |
| 14269570 | EICPDGENIFPVTSYVETVTGELVTPR |               | seminal vesicle antigen-like 1 [Mus musculus]                                                       | 3078.5374 | 29.11  | 0           |
| 63578850 | EIDDEANSYFQR                |               | PREDICTED: CCR4-NOT transcription complex, subunit 1 [Mus musculus]                                 | 1486.6445 | 28.2   | 0           |
| 13385168 | EIDQEAAVEVSQLR              |               | ubiquinol-cytochrome c reductase, Rieske iron-sulfur polypeptide 1 [Mus musculus]                   | 1586.8035 | 102.24 | 0.47013352  |
| 51592084 | EIEIAEQEMPALMALR            |               | hypothetical protein LOC74340 [Mus musculus]                                                        | 1843.9299 | 75.98  | 0           |
| 31980942 | EIEIILQR                    |               | Inositol (myo)-1(or 4)-monophosphatase 1 [Mus musculus]                                             | 1110.6537 | 35.86  | 0.384304673 |
| 41054996 | EIEVPDQYGTIR                |               | echinoderm microtubule associated protein like 4 [Mus musculus]                                     | 1419.7092 | 40.42  | 1.378089381 |
| 26986563 | EIFAQEALAPFR                |               | choline dehydrogenase [Mus musculus]                                                                | 1391.7385 | 53.34  | 0.406001298 |
| 7305085  | EIFEQPESVVNTMR              |               | glutamine fructose-6-phosphate transaminase 1 [Mus musculus]                                        | 1678.8135 | 84.65  | 0.63711797  |
| 28173568 | EIFLSQPILLEEAPLK            |               | protein phosphatase 1, catalytic subunit, beta [Mus musculus]                                       | 1953.1288 | 90.39  | 0.329866987 |
| 9790051  | EIGWADVGGWGTGGGSILGTK       |               | phosphofructokinase, platelet [Mus musculus]                                                        | 2089.0308 | 32.06  | 0           |
| 34740335 | EIIDLVDR                    |               | tubulin, alpha 2 [Mus musculus]                                                                     | 1085.6201 | 50.14  | 0.457965931 |
| 6678469  | EIIDLVDR                    |               | tubulin, alpha 6 [Mus musculus]                                                                     | 1085.6201 | 50.14  | 0.457965931 |
| 6678467  | EIIDPVLDR                   |               | tubulin, alpha 4 [Mus musculus]                                                                     | 1069.5854 | 32.6   | 0           |
| 6755048  | EIIGVVSQEPVLFATTIAENIR      |               | ATP-binding cassette, sub-family B (MDR/TAP), member 1A [Mus musculus]                              | 2399.2976 | 38.53  | 0.187659856 |
| 6677769  | EILGTAQSVGNCNDGR            |               | ribosomal protein L12 [Mus musculus]                                                                | 1618.7794 | 43.93  | 0           |
| 9790219  | EILVGDVGATITDPFK            |               | destrin [Mus musculus]                                                                              | 1674.8932 | 119.32 | 0.21422673  |
| 6680924  | EILVGDVGQTVDDPYTTFVK        |               | cofilin 1, non-muscle [Mus musculus]                                                                | 2196.1096 | 108.51 | 0           |
| 27804325 | EIPVDAPWQAR                 |               | monoamine oxidase A [Mus musculus]                                                                  | 1281.66   | 44.79  | 0.366501484 |
| 40254124 | EIQEPDPTYEEK                |               | SWI/SNF related, matrix associated, actin dependent regulator of chromatin, subfamily a, member 5 [ | 1477.6664 | 23.34  | 0           |
| 51766545 | EIQGFFSFPVDNLR              |               | PREDICTED: phosphoribosyl pyrophosphate synthetase-associated protein 1 [Mus musculus]              | 1668.8342 | 22.25  | 0.613547156 |
| 6671507  | EITALAPSTMK                 |               | actin, alpha 2, smooth muscle, aorta [Mus musculus]                                                 | 1161.6162 | 76.6   | 0.27459138  |
| 6671509  | EITALAPSTMK                 |               | actin, beta, cytoplasmic [Mus musculus]                                                             | 1161.6162 | 76.6   | 0.27459138  |
| 63652452 | EITALAPSTMK                 |               | PREDICTED: similar to cytoplasmic beta-actin [Mus musculus]                                         | 1161.6162 | 76.6   | 0.27459138  |
| 6671507  | EITALAPSTMK                 | Oxidation (M) | actin, alpha 2, smooth muscle, aorta [Mus musculus]                                                 | 1177.6053 | 27.87  | 0           |
| 6671509  | EITALAPSTMK                 | Oxidation (M) | actin, beta, cytoplasmic [Mus musculus]                                                             | 1177.6053 | 27.87  | 0           |
| 63652452 | EITALAPSTMK                 | Oxidation (M) | PREDICTED: similar to cytoplasmic beta-actin [Mus musculus]                                         | 1177.6053 | 27.87  | 0           |
| 14861854 | EITINQSLAPLSVDIDPTIQQVR     |               | keratin complex 2, basic, gene 7 [Mus musculus]                                                     | 2663.4583 | 37.22  | 0.258116543 |
| 13385434 | EIVLADVIDNSWR               |               | phosphoribosylaminoimidazole carboxylase [Mus musculus]                                             | 1644.8279 | 55.54  | 0           |
| 22203747 | EKDFDSLAPQSFDDR             |               | procollagen, type VI, alpha 2 [Mus musculus]                                                        | 1801.8369 | 39.11  | 0           |
| 28269703 | EKEEEEEDEEDASGGDQDQEER      |               | RAD21 homolog [Mus musculus]                                                                        | 2711.0366 | 27.17  | 0.503631151 |
| 7949051  | EKPYFPIPEDCTFIQNVPLEDR      |               | heterogenous nuclear ribonucleoprotein U [Mus musculus]                                             | 2650.2825 | 68.93  | 0.411375682 |
| 6755372  | ELAEDGYSGVEVR               |               | ribosomal protein S3 [Mus musculus]                                                                 | 1423.6707 | 82.92  | 0.817939117 |
| 51712562 | ELAPYDENWIFYR               |               | PREDICTED: similar to ribosomal protein S19 [Mus musculus]                                          | 1703.7716 | 59.17  | 0.52040303  |

|          |                                |               |                                                                      |           |        |             |
|----------|--------------------------------|---------------|----------------------------------------------------------------------|-----------|--------|-------------|
| 12963511 | ELAPYDENWFYTR                  |               | ribosomal protein S19 [Mus musculus]                                 | 1703.7716 | 59.17  | 0.52040303  |
| 6681157  | ELAQQVQQAAYEYCR                |               | DEAD (Asp-Glu-Ala-Asp) box polypeptide 5 [Mus musculus]              | 1735.8478 | 47.81  | 0.548954088 |
| 63621901 | ELAQQVQQAAYEYCR                |               | PREDICTED: similar to ddx5 [Mus musculus]                            | 1735.8478 | 47.81  | 0.548954088 |
| 24429590 | ELDALDANDELTPPLGR              |               | DEAH (Asp-Glu-Ala-His) box polypeptide 9 [Mus musculus]              | 1741.8599 | 75.5   | 0.422076336 |
| 7305295  | ELDEATESNEAMGR                 |               | myosin, heavy polypeptide 11, smooth muscle [Mus musculus]           | 1551.6658 | 126.51 | 0           |
| 7305295  | ELDEATESNEAMGR                 | Oxidation (M) | myosin, heavy polypeptide 11, smooth muscle [Mus musculus]           | 1567.6526 | 54.08  | 0.084005839 |
| 29336026 | ELEDVTESAEMNMR                 |               | nonmuscle myosin heavy chain [Mus musculus]                          | 1609.7065 | 50.39  | 0           |
| 31981722 | ELEEIVQPIISK                   |               | heat shock 70kD protein 5 (glucose-regulated protein) [Mus musculus] | 1397.7831 | 42.31  | 1.359129854 |
| 7949023  | ELEEYWAR                       |               | clathrin, light polypeptide (Lca) [Mus musculus]                     | 1095.5105 | 26.48  | 0           |
| 6677813  | ELEFYLR                        |               | ribosomal protein S8 [Mus musculus]                                  | 969.5059  | 37.9   | 0.487731641 |
| 7305295  | ELEGHISDLQEDLDSER              |               | myosin, heavy polypeptide 11, smooth muscle [Mus musculus]           | 1984.9103 | 103.32 | 0.09399438  |
| 7106435  | ELEPGVEYFIR                    |               | tenascin C [Mus musculus]                                            | 1351.6941 | 34.35  | 0.235661625 |
| 20137006 | ELETQISELQEDLESER              |               | myosin, heavy polypeptide 9, non-muscle [Mus musculus]               | 2047.9701 | 107.63 | 0.461688505 |
| 6680067  | ELFEADPER                      |               | glucose phosphate isomerase 1 [Mus musculus]                         | 1105.5167 | 38.7   | 0.490789231 |
| 29336026 | ELFQETLESRL                    |               | nonmuscle myosin heavy chain [Mus musculus]                          | 1364.7085 | 68.93  | 0.304277131 |
| 33563290 | ELFSNLQEFAGPSGK                |               | DKFZP586A0522 protein [Mus musculus]                                 | 1623.7911 | 32.31  | 0           |
| 23956084 | ELGAFGLQVPSGLGLSNTQYAR         |               | acyl-Coenzyme A dehydrogenase, very long chain [Mus musculus]        | 2577.3281 | 118.67 | 0.223179372 |
| 6753036  | ELGEYGLQAYTEVK                 |               | aldehyde dehydrogenase 2, mitochondrial [Mus musculus]               | 1599.7902 | 87.1   | 0.254474201 |
| 20147793 | ELGQDGEEAEAPGAGDGPPR           |               | RD RNA-binding protein [Mus musculus]                                | 1951.8606 | 50.99  | 0.523851656 |
| 63476037 | ELGTIQQVISER                   |               | PREDICTED: procollagen, type VI, alpha 3 [Mus musculus]              | 1372.7428 | 65.04  | 0.17260768  |
| 13385878 | ELILSSEPSPAVTPVPTTLIAPR        |               | sorting nexin 2 [Mus musculus]                                       | 2489.3977 | 38.87  | 0.546249694 |
| 13386054 | ELLLQPVTISR                    |               | actin related protein 2/3 complex, subunit 4 [Mus musculus]          | 1268.7548 | 40.84  | 0.46654625  |
| 13385998 | ELLQESALIR                     |               | TNF receptor-associated protein 1 [Mus musculus]                     | 1171.6682 | 23.4   | 0           |
| 31982233 | ELLSVGLGFLR                    |               | LYRIC [Mus musculus]                                                 | 1203.7139 | 33.47  | 0.882258145 |
| 56744242 | ELLYFLDSCEPEFK                 |               | adaptor protein complex AP-1, gamma 1 subunit [Mus musculus]         | 1732.8279 | 32.86  | 0           |
| 6679687  | ELNDFISYLQR                    |               | glucose regulated protein [Mus musculus]                             | 1397.7095 | 86.95  | 0.509166585 |
| 63476037 | ELPNIEER                       |               | PREDICTED: procollagen, type VI, alpha 3 [Mus musculus]              | 999.511   | 35.84  | 0.146551529 |
| 11230802 | ELPPDQAEYCIAR                  |               | actinin alpha 4 [Mus musculus]                                       | 1504.7141 | 43.14  | 0.618424176 |
| 63489759 | ELPTAFDYVEFTR                  |               | PREDICTED: spectrin alpha 2 [Mus musculus]                           | 1587.7754 | 50.41  | 0.415856205 |
| 31560737 | ELPVNAQNYVR                    |               | adenylosuccinate synthetase, non muscle [Mus musculus]               | 1302.6775 | 50.07  | 0           |
| 51708271 | ELQAEQQNQEVTR                  |               | PREDICTED: cingulin [Mus musculus]                                   | 1629.7864 | 58.45  | 0.490659898 |
| 33563250 | ELQAQLQEQQVQVEMDMSPDLTAALR     |               | desmin [Mus musculus]                                                | 3099.5493 | 50.9   | 0.119591838 |
| 30023842 | ELQELVQYPVEHPDK                |               | valosin containing protein [Mus musculus]                            | 1823.9194 | 60.33  | 0.507186217 |
| 13624315 | ELQSQISDTSVVLSDMNSR            |               | keratin complex 2, basic, gene 8 [Mus musculus]                      | 2109.0156 | 155.58 | 0.375135134 |
| 63565108 | ELQSQISDTSVVLSDMNSR            |               | PREDICTED: similar to cytokeratin EndoA - mouse [Mus musculus]       | 2109.0156 | 155.58 | 0.375135134 |
| 13624315 | ELQSQISDTSVVLSDMNSR            | Oxidation (M) | keratin complex 2, basic, gene 8 [Mus musculus]                      | 2125.0103 | 23.27  | 0.517632143 |
| 63565108 | ELQSQISDTSVVLSDMNSR            | Oxidation (M) | PREDICTED: similar to cytokeratin EndoA - mouse [Mus musculus]       | 2125.0103 | 23.27  | 0.517632143 |
| 31981044 | ELSADGAQEATGTQR                |               | ubiquitin specific protease 8 [Mus musculus]                         | 1533.7026 | 25.15  | 0           |
| 46275826 | ELVDEEADEAQELLSQAENWQR         |               | laminin, alpha 4 [Mus musculus]                                      | 2602.1909 | 50.36  | 0           |
| 31982522 | ELVPIAAQLDR                    |               | acyl-Coenzyme A dehydrogenase, short chain [Mus musculus]            | 1224.6938 | 28.92  | 0           |
| 28416440 | ELVVVDTPGIFDTEVPDADTQR         |               | GTPase, IMAP family member 4 isoform a [Mus musculus]                | 2416.1912 | 77.06  | 1.4668783   |
| 13385076 | ELWAVLNGWR                     |               | sorcin [Mus musculus]                                                | 1243.6638 | 46.95  | 0.277025057 |
| 33469123 | ELYLFDVLR                      |               | asparagine synthetase [Mus musculus]                                 | 1167.6433 | 23.81  | 0.864348379 |
| 31982755 | EMEENFALEAANYQDTIGR            |               | vimentin [Mus musculus]                                              | 2201.0022 | 128.5  | 0           |
| 7305295  | EMEGLSQQYEEK                   |               | myosin, heavy polypeptide 11, smooth muscle [Mus musculus]           | 1470.6447 | 77.52  | 0           |
| 7305295  | EMEGLSQQYEEK                   | Oxidation (M) | myosin, heavy polypeptide 11, smooth muscle [Mus musculus]           | 1486.6503 | 24.15  | 0           |
| 6671666  | EMNDAAMFYTNR                   |               | CAP, adenylate cyclase-associated protein 1 [Mus musculus]           | 1462.6263 | 73.5   | 0.699264015 |
| 18079351 | EMTEALPGTIR                    |               | major vault protein [Mus musculus]                                   | 1274.6405 | 27.49  | 0           |
| 30023842 | EMVELPLR                       |               | valosin containing protein [Mus musculus]                            | 986.5326  | 25.85  | 0.252224905 |
| 22122523 | EMVQADVLMR                     |               | GDP-mannose 4, 6-dehydratase [Mus musculus]                          | 1320.6216 | 27.87  | 0           |
| 21313526 | EMWYAGINPSDSVNSEVLGATR         |               | hypothetical protein LOC78906 [Mus musculus]                         | 2396.1238 | 49.52  | 0.615935335 |
| 7305295  | ENADLAGELR                     |               | myosin, heavy polypeptide 11, smooth muscle [Mus musculus]           | 1087.5367 | 65.55  | 0           |
| 31560680 | ENDYYTPTGEFR                   |               | integral membrane protein 1 [Mus musculus]                           | 1491.6371 | 58.56  | 0.393942109 |
| 39204553 | ENEFSFEDNAIR                   |               | chromodomain helicase DNA binding protein 4 [Mus musculus]           | 1470.6493 | 34.93  | 0.849162165 |
| 13384736 | ENFIPTIVNFSAAEISDAIR           |               | dynein, cytoplasmic, heavy chain 1 [Mus musculus]                    | 2265.1387 | 73.54  | 0.203456424 |
| 63746482 | ENGIYLIDVK                     |               | PREDICTED: filamin, alpha [Mus musculus]                             | 1163.6166 | 32.48  | 0           |
| 21450129 | ENGTITAAANSTLNDGAAALVLMTAAEAQR |               | acetyl-Coenzyme A acetyltransferase 1 precursor [Mus musculus]       | 2945.459  | 51.59  | 0.226306531 |
| 13277350 | ENIETVVTGSLDDLK                |               | meiotic recombination protein REC14 [Mus musculus]                   | 1731.8752 | 52.04  | 3.152168597 |
| 31982522 | ENLLGEPGMGFK                   |               | acyl-Coenzyme A dehydrogenase, short chain [Mus musculus]            | 1291.6292 | 56.36  | 0           |
| 42734399 | ENLLEELER                      |               | desmuslin isoform H [Mus musculus]                                   | 1257.6702 | 31.11  | 0           |

|          |                          |                  |                                                                                                                       |           |        |             |
|----------|--------------------------|------------------|-----------------------------------------------------------------------------------------------------------------------|-----------|--------|-------------|
| 46559834 | ENLLEELR                 |                  | desmuslin isoform M [Mus musculus]                                                                                    | 1257.6702 | 31.11  | 0           |
| 22267442 | ENMAYVEGIR               |                  | ubiquinol cytochrome c reductase core protein 2 [Mus musculus]                                                        | 1282.6093 | 32.37  | 0           |
| 6671678  | ENQQSPINIVTAR            |                  | carbonic anhydrase 4 [Mus musculus]                                                                                   | 1469.7681 | 47.52  | 0.845000099 |
| 18250284 | ENTEGEYSIGIEHVIVDGVVQSIK |                  | isocitrate dehydrogenase 3 (NAD+) alpha [Mus musculus]                                                                | 2502.2349 | 37.57  | 0.471315309 |
| 6753484  | ENYAELDDGFLK             |                  | procollagen, type VI, alpha 1 [Mus musculus]                                                                          | 1526.7386 | 82.83  | 0.190648915 |
| 33859506 | ENYGLADCCCTK             |                  | albumin 1 [Mus musculus]                                                                                              | 1345.543  | 32.78  | 1.98420131  |
| 19526926 | EPFTFPVR                 |                  | hypothetical protein LOC70984 [Mus musculus]                                                                          | 992.5217  | 23.85  | 0           |
| 33469029 | EPGEAAAEAGAAEEAR         |                  | acyl-Coenzyme A binding domain containing 3 [Mus musculus]                                                            | 1457.6581 | 94.69  | 0.263563442 |
| 31982290 | EPIMPAPGQEETVR           |                  | LIM domain containing preferred translocation partner in lipoma [Mus musculus]                                        | 1553.7634 | 61.39  | 0           |
| 31982290 | EPIMPAPGQEETVR           | Oxidation (M)    | LIM domain containing preferred translocation partner in lipoma [Mus musculus]                                        | 1569.7513 | 27.37  | 0           |
| 31981657 | EPITVSSEQMSHFR           |                  | carbonic anhydrase 2 [Mus musculus]                                                                                   | 1647.7786 | 125.57 | 0           |
| 31981657 | EPITVSSEQMSHFR           | Oxidation (M)    | carbonic anhydrase 2 [Mus musculus]                                                                                   | 1663.7682 | 50.52  | 0           |
| 8567390  | EPPEAVWADDVDR            |                  | pyruvate kinase liver and red blood cell [Mus musculus]                                                               | 1498.6891 | 41.74  | 1.047744882 |
| 51708124 | EPPTDVTPTFLTTGVLSTLR     |                  | PREDICTED: similar to GMP synthase [glutamine-hydrolyzing] (Glutamine amidotransferase) (GMP synthase)                | 2145.136  | 39.76  | 0           |
| 6679891  | EPWLLASQYQDAIR           |                  | alpha glucosidase 2 alpha neutral subunit [Mus musculus]                                                              | 1689.8624 | 35.32  | 0           |
| 7305295  | EQADFAIEALAK             |                  | myosin, heavy polypeptide 11, smooth muscle [Mus musculus]                                                            | 1305.6924 | 63.13  | 0           |
| 20137006 | EQADFAIEALAK             |                  | myosin, heavy polypeptide 9, non-muscle [Mus musculus]                                                                | 1305.6924 | 63.13  | 0           |
| 54607037 | EQASGVVSFEQPEYSVSR       |                  | integrin beta 4 isoform 2 [Mus musculus]                                                                              | 1998.9419 | 49.24  | 0.623996468 |
| 6680836  | EQFLDGDWNTNR             |                  | calreticulin [Mus musculus]                                                                                           | 1451.6666 | 27.65  | 0.563118054 |
| 51764087 | EQGFLSFWR                |                  | PREDICTED: solute carrier family 25 (mitochondrial carrier, adenine nucleotide translocator), member 1 [Mus musculus] | 1169.5807 | 57.1   | 0.189143782 |
| 6755809  | EQGVEEHETLLLR            |                  | talain 1 [Mus musculus]                                                                                               | 1552.7954 | 68.59  | 0           |
| 22094075 | EQGVLSFWR                |                  | solute carrier family 25, member 5 [Mus musculus]                                                                     | 1121.5807 | 60.75  | 0.351944807 |
| 6996911  | EQGYDVIAYLANIGQK         |                  | argininosuccinate synthetase [Mus musculus]                                                                           | 1781.8956 | 41.52  | 0           |
| 51772556 | EQIDIFEGIK               |                  | PREDICTED: similar to Succinate-Coenzyme A ligase, GDP-forming, beta subunit [Mus musculus]                           | 1191.6078 | 47.51  | 0           |
| 6678499  | EQIVVDSLHPGVSADDQVSR     |                  | UDP-glucose dehydrogenase [Mus musculus]                                                                              | 2151.0684 | 79.58  | 0.228066641 |
| 7305565  | EQLAIAEFAR               |                  | t-complex protein 1 [Mus musculus]                                                                                    | 1147.6129 | 22.09  | 0           |
| 6754782  | EQLLQSNPVLEAFGNK         |                  | myosin IB [Mus musculus]                                                                                              | 1857.9678 | 42.28  | 0.613345219 |
| 51766008 | EQLLQSNPVLEAFGNK         |                  | PREDICTED: myosin IA [Mus musculus]                                                                                   | 1857.9678 | 42.28  | 0.613345219 |
| 34536813 | EQLMEENECLR              | Deamidation (NQ) | hypothetical protein LOC75089 [Mus musculus]                                                                          | 1394.62   | 32.26  | 0           |
| 18252782 | EQLQDMGLIDLFSPEK         |                  | serine (or cysteine) proteinase inhibitor, clade C (antithrombin), member 1 [Mus musculus]                            | 1862.9272 | 64.67  | 0           |
| 21450277 | EQPLDEELKDAFQNAYLELGLGER |                  | Na+/K+ -ATPase alpha 1 subunit [Mus musculus]                                                                         | 2834.3801 | 121.84 | 0.254103306 |
| 13384736 | EQPWVSVQPR               |                  | dynein, cytoplasmic, heavy chain 1 [Mus musculus]                                                                     | 1225.6315 | 34.47  | 0.409112793 |
| 18700024 | EQTEGEYSLEHESAK          |                  | isocitrate dehydrogenase 3, beta subunit [Mus musculus]                                                               | 1823.7946 | 22.14  | 0.114336174 |
| 40556608 | EQVANSAFVER              |                  | heat shock protein 1, beta [Mus musculus]                                                                             | 1249.6178 | 68.49  | 0.643804384 |
| 31560653 | EQWWLNLR                 |                  | phosphofructokinase, liver, B-type [Mus musculus]                                                                     | 1144.5936 | 42.08  | 0           |
| 6677935  | ESDGTGPGGLASLENER        |                  | sorbin and SH3 domain containing 1 [Mus musculus]                                                                     | 1631.752  | 65.93  | 0           |
| 31560128 | ESENEANPEEQGLEESGEFFAR   |                  | hypothetical protein LOC68303 [Mus musculus]                                                                          | 2480.0659 | 43.93  | 0           |
| 6679465  | ESLQQLAEVTR              |                  | protein kinase C substrate 80K-H [Mus musculus]                                                                       | 1273.6721 | 24.95  | 0           |
| 63750688 | ESNQPPEDSSPPASSESSSTR    |                  | PREDICTED: HECT, UBA and WWE domain containing 1 [Mus musculus]                                                       | 2175.928  | 26.07  | 1.111654603 |
| 13384736 | ESPEVLLTLDLK             |                  | dynein, cytoplasmic, heavy chain 1 [Mus musculus]                                                                     | 1469.8459 | 29.06  | 0           |
| 6678752  | ESPYDHQSLQALQEAFSTR      |                  | lymphocyte antigen 74 [Mus musculus]                                                                                  | 2308.0852 | 44.87  | 0.615922648 |
| 6754994  | ESTGAQVQVAGDMLPNSTER     |                  | poly(rC) binding protein 1 [Mus musculus]                                                                             | 2089.9834 | 119.1  | 0.3134606   |
| 6678185  | ESVFALDFLR               |                  | surfeit gene 6 [Mus musculus]                                                                                         | 1196.6324 | 26.2   | 0           |
| 42734399 | ESVQLYEDEV               |                  | desmuslin isoform H [Mus musculus]                                                                                    | 1366.6532 | 73.43  | 0           |
| 46559834 | ESVQLYEDEV               |                  | desmuslin isoform M [Mus musculus]                                                                                    | 1366.6532 | 73.43  | 0           |
| 9910482  | ESVQVPDDQDFR             |                  | START domain containing 10 [Mus musculus]                                                                             | 1434.6547 | 35.28  | 0.401641079 |
| 20874851 | ESYSVYVYK                |                  | PREDICTED: similar to histone H2b-616 [Mus musculus]                                                                  | 1137.5437 | 44.4   | 0           |
| 22122515 | ETFLTSPPELYR             |                  | AHA1, activator of heat shock 90kDa protein ATPase homolog 1 [Mus musculus]                                           | 1484.7271 | 32.05  | 0.517872518 |
| 24429590 | ETPFELIEALLK             |                  | DEAH (Asp-Glu-Ala-His) box polypeptide 9 [Mus musculus]                                                               | 1402.7764 | 43.89  | 0.429612428 |
| 7106363  | ETPGSQPSEPCSGVSR         |                  | microtubule-associated protein 4 [Mus musculus]                                                                       | 1617.7214 | 41.43  | 0.287983312 |
| 31982223 | ETPSWTGPGFVR             |                  | laminin, beta 2 [Mus musculus]                                                                                        | 1333.652  | 25.78  | 0           |
| 42734399 | ETSFTFQMDLSDTR           | Oxidation (M)    | desmuslin isoform H [Mus musculus]                                                                                    | 1693.7388 | 22.24  | 0           |
| 63492203 | ETSYEEALANQR             |                  | PREDICTED: ribosome binding protein 1 [Mus musculus]                                                                  | 1410.6503 | 94.5   | 0.522986141 |
| 21450291 | ETTIQGLDGLSER            |                  | aldolase 2, B isoform [Mus musculus]                                                                                  | 1418.7141 | 32.02  | 0           |
| 22122523 | ETTPFYPR                 |                  | GDP-mannose 4, 6-dehydratase [Mus musculus]                                                                           | 1010.4962 | 23.31  | 0.43151827  |
| 30023842 | ETVVEVPQVTWEDIGGLEDVK    |                  | valosin containing protein [Mus musculus]                                                                             | 2342.1482 | 48.88  | 0           |
| 30023842 | ETVVEVPQVTWEDIGGLEDVKR   |                  | valosin containing protein [Mus musculus]                                                                             | 2498.2834 | 93.84  | 0           |
| 30023842 | ETVVEVPQVTWEDIGGLEDVKR   | Deamidation (NQ) | valosin containing protein [Mus musculus]                                                                             | 2499.2708 | 23     | 0           |
| 51772556 | ETYLAILMDR               |                  | PREDICTED: similar to Succinate-Coenzyme A ligase, GDP-forming, beta subunit [Mus musculus]                           | 1224.6327 | 50.58  | 0           |
| 6680748  | EVAFAQFGSDLAATQQLSR      |                  | ATP synthase, H+ transporting, mitochondrial F1 complex, alpha subunit, isoform 1 [Mus musculus]                      | 2338.1707 | 127.4  | 0.356017053 |

|          |                               |               |                                                                                                     |           |        |             |
|----------|-------------------------------|---------------|-----------------------------------------------------------------------------------------------------|-----------|--------|-------------|
| 31982169 | EVAEVLNLTGTVR                 |               | 3-hydroxybutyrate dehydrogenase (heart, mitochondrial) [Mus musculus]                               | 1372.7205 | 48.4   | 0           |
| 30425008 | EVAEYQAQSGNSAEK               |               | RIKEN cDNA 5730439E10 [Mus musculus]                                                                | 1645.739  | 58.94  | 0.369119581 |
| 31560449 | EVAGQVGVPLQDLMVR              |               | aspartyl aminopeptidase [Mus musculus]                                                              | 1710.9218 | 38.38  | 0           |
| 9055322  | EVCGFAPYER                    |               | ribosomal protein L36 [Mus musculus]                                                                | 1170.5291 | 33.24  | 0.490299559 |
| 30348966 | EVDDLEQWIAER                  |               | spectrin beta 2 isoform 1 [Mus musculus]                                                            | 1502.7184 | 66.65  | 0.353921296 |
| 7106421  | EVDDLEQWIAER                  |               | spectrin beta 2 isoform 2 [Mus musculus]                                                            | 1502.7184 | 66.65  | 0.353921296 |
| 63650229 | EVDEQMLNVQNK                  |               | PREDICTED: similar to TUBULIN BETA CHAIN (T BETA-15) [Mus musculus]                                 | 1446.6868 | 56.55  | 0.878324998 |
| 22165384 | EVDEQMLNVQNK                  |               | tubulin, beta, 2 [Mus musculus]                                                                     | 1446.6868 | 56.55  | 0.878324998 |
| 33859488 | EVDEQMLNVQNK                  |               | tubulin, beta 2 [Mus musculus]                                                                      | 1446.6868 | 56.55  | 0.878324998 |
| 7106439  | EVDEQMLNVQNK                  |               | tubulin, beta 5 [Mus musculus]                                                                      | 1446.6868 | 56.55  | 0.878324998 |
| 21746161 | EVDEQMLNVQNK                  |               | tubulin, beta [Mus musculus]                                                                        | 1446.6868 | 56.55  | 0.878324998 |
| 63650229 | EVDEQMLNVQNK                  | Oxidation (M) | PREDICTED: similar to TUBULIN BETA CHAIN (T BETA-15) [Mus musculus]                                 | 1462.6677 | 53.37  | 0.230364382 |
| 22165384 | EVDEQMLNVQNK                  | Oxidation (M) | tubulin, beta, 2 [Mus musculus]                                                                     | 1462.6677 | 53.37  | 0.230364382 |
| 33859488 | EVDEQMLNVQNK                  | Oxidation (M) | tubulin, beta 2 [Mus musculus]                                                                      | 1462.6677 | 53.37  | 0.230364382 |
| 7106439  | EVDEQMLNVQNK                  | Oxidation (M) | tubulin, beta 5 [Mus musculus]                                                                      | 1462.6677 | 53.37  | 0.230364382 |
| 21746161 | EVDEQMLNVQNK                  | Oxidation (M) | tubulin, beta [Mus musculus]                                                                        | 1462.6677 | 53.37  | 0.230364382 |
| 30023842 | EVDIGIPDATGR                  |               | valosin containing protein [Mus musculus]                                                           | 1242.634  | 90.92  | 0.600986767 |
| 12963527 | EVEERPAPTPWGSK                |               | actin related protein 2/3 complex, subunit 1B [Mus musculus]                                        | 1582.7848 | 27.44  | 0.354667734 |
| 29789052 | EVENEQTPVSEPEEEK              |               | erythrocyte protein band 4.1-like 2 [Mus musculus]                                                  | 1872.8297 | 28.63  | 1.047164539 |
| 14149756 | EVEPEPTEEKDVDADEEDSR          |               | eukaryotic translation initiation factor 2, subunit 2 (beta) [Mus musculus]                         | 2317.9824 | 83.33  | 0.427127331 |
| 46593021 | EVESIGAHLNAYSTR               |               | ubiquinol-cytochrome c reductase core protein 1 [Mus musculus]                                      | 1646.8127 | 56.73  | 0.642012176 |
| 31542143 | EVFEMATR                      |               | ras homolog gene family, member A [Mus musculus]                                                    | 982.4681  | 28.07  | 0           |
| 31980685 | EVGAFGTPVINLGR                |               | glucosamine [Mus musculus]                                                                          | 1530.828  | 71.91  | 0.531541504 |
| 27754103 | EVIELPLTNPFLFQR               |               | proteasome 26S ATPase subunit 6 [Mus musculus]                                                      | 1797.9719 | 33.09  | 0.253950544 |
| 26986563 | EVILSGGAINSPQLMLSLGSGVGNADDLR |               | choline dehydrogenase [Mus musculus]                                                                | 2739.4189 | 23.78  | 0.466502997 |
| 6755809  | EVIQEWSLTNK                   |               | talin 1 [Mus musculus]                                                                              | 1459.7665 | 31.48  | 0           |
| 7305295  | EVLQVQVEDER                   |               | myosin, heavy polypeptide 11, smooth muscle [Mus musculus]                                          | 1229.6372 | 53.14  | 0           |
| 6680572  | EVLQALEELAVNYDQK              |               | kinesin family member 5B [Mus musculus]                                                             | 1861.9424 | 38.02  | 0           |
| 33468931 | EVMQEVQALSQFDEELYK            |               | seryl-aminoacyl-tRNA synthetase 1 [Mus musculus]                                                    | 2186.0432 | 44.98  | 0.570795411 |
| 6680067  | EVMQMLVELAK                   |               | glucose phosphate isomerase 1 [Mus musculus]                                                        | 1290.6797 | 49.74  | 0           |
| 6678573  | EVQGNESSETFR                  |               | villin 1 [Mus musculus]                                                                             | 1295.5902 | 32.65  | 0.355035589 |
| 33859811 | EVQSEFIEVMNEIWANDQIR          |               | hydroxyacyl-Coenzyme A dehydrogenase/3-ketoacyl-Coenzyme A thiolase/enoyl-Coenzyme A hydratase (tri | 2450.1719 | 34.04  | 0           |
| 27229048 | EVSDGIVAPGYEEELAK             |               | 5-aminoimidazole-4-carboxamide ribonucleotide formyltransferase/IMP cyclohydrolase [Mus musculus]   | 1805.8779 | 61.59  | 1.271974281 |
| 6680816  | EVSFQATGDSEWR                 |               | complement component 1, q subcomponent binding protein [Mus musculus]                               | 1511.6812 | 31.84  | 0.372331554 |
| 6679737  | EVSGNELIQTYYEGVEAK            |               | fatty acid binding protein 2, intestinal [Mus musculus]                                             | 2129.9897 | 40.1   | 0           |
| 6753240  | EVSQPDWTPPPEVTLSLTK           |               | calcium binding protein, intestinal [Mus musculus]                                                  | 2124.0881 | 29.38  | 0           |
| 21450129 | EVYMGNVIQGGEGQAPTR            |               | acetyl-Coenzyme A acetyltransferase 1 precursor [Mus musculus]                                      | 1905.9183 | 87.73  | 0.275406256 |
| 21450129 | EVYMGNVIQGGEGQAPTR            | Oxidation (M) | acetyl-Coenzyme A acetyltransferase 1 precursor [Mus musculus]                                      | 1921.9106 | 44.65  | 0.339856306 |
| 31560611 | EWIEGVTGR                     |               | calponin 1 [Mus musculus]                                                                           | 1046.5332 | 54.67  | 0           |
| 9790051  | EWSGLLEELAR                   |               | phosphofructokinase, platelet [Mus musculus]                                                        | 1302.6753 | 81.21  | 0.394670216 |
| 19526822 | EWWELR                        |               | sulfotransferase family 1A, phenol-preferring, member 1 [Mus musculus]                              | 918.4546  | 28.05  | 0.147731554 |
| 6679759  | EYEELCPR                      |               | fibrillin 1 [Mus musculus]                                                                          | 1038.454  | 31.4   | 0           |
| 6754222  | EYFGQFGEIEAIELPIDPK           |               | heterogeneous nuclear ribonucleoprotein A/B [Mus musculus]                                          | 2195.0933 | 63.45  | 1.121519806 |
| 9625037  | EYIPTVFDNYSQAQSAVDGR          |               | ras homolog gene family, member G [Mus musculus]                                                    | 2131.9983 | 47.22  | 0.45731385  |
| 33563250 | EYQDLLNVK                     |               | desmin [Mus musculus]                                                                               | 1121.58   | 54.86  | 0           |
| 34328368 | EYQDLLNVK                     |               | internexin neuronal intermediate filament protein, alpha [Mus musculus]                             | 1121.58   | 54.86  | 0           |
| 39204499 | EYQDLLNVK                     |               | neurofilament, light polypeptide [Mus musculus]                                                     | 1121.58   | 54.86  | 0           |
| 31982755 | EYQDLLNVK                     |               | vimentin [Mus musculus]                                                                             | 1121.58   | 54.86  | 0           |
| 29244176 | EYQELMNVK                     |               | hypothetical protein 4732456N10 [Mus musculus]                                                      | 1153.5476 | 39.07  | 0           |
| 33563238 | EYQELMNVK                     |               | keratin complex 2, basic, gene 16 [Mus musculus]                                                    | 1153.5476 | 39.07  | 0           |
| 13624315 | EYQELMNVK                     |               | keratin complex 2, basic, gene 8 [Mus musculus]                                                     | 1153.5476 | 39.07  | 0           |
| 29789317 | EYQELMNVK                     |               | keratinocyte associated protein 1 [Mus musculus]                                                    | 1153.5476 | 39.07  | 0           |
| 1346345  | EYQELMNVK                     |               | Keratin, type II cytoskeletal 6B (Cytokeratin 6B) (CK 6B) (K6b keratin)                             | 1153.5476 | 39.07  | 0           |
| 20903595 | EYQELMNVK                     |               | PREDICTED: RIKEN cDNA 2310001L23 [Mus musculus]                                                     | 1153.5476 | 39.07  | 0           |
| 41054806 | EYQLNDSAAYYLNDLER             |               | guanine nucleotide binding protein, alpha inhibiting 2 [Mus musculus]                               | 2076.9558 | 112.15 | 0.40796285  |
| 13384736 | EYQTQLIQR                     |               | dynein, cytoplasmic, heavy chain 1 [Mus musculus]                                                   | 1178.6185 | 43.01  | 1.087081876 |
| 63635087 | EYSSELNAPSQESDSSHPR           |               | PREDICTED: RNA binding motif protein 25 [Mus musculus]                                              | 2032.8887 | 41.05  | 0.42436805  |
| 31560560 | FAAATGATPIAGR                 |               | laminin receptor 1 (ribosomal protein SA) [Mus musculus]                                            | 1203.6533 | 60.35  | 0.42912239  |
| 6680067  | FAAYFQQGDMESNGK               |               | glucose phosphate isomerase 1 [Mus musculus]                                                        | 1692.7467 | 71.65  | 0           |
| 6753254  | FADDELIDFDNFVR                |               | calpain 2 [Mus musculus]                                                                            | 1828.8795 | 97.83  | 0.277144217 |



|          |                       |                  |                                                                                         |           |        |             |
|----------|-----------------------|------------------|-----------------------------------------------------------------------------------------|-----------|--------|-------------|
| 31982755 | FADLSEAAANR           |                  | vimentin [Mus musculus]                                                                 | 1093.5308 | 62.27  | 0.459405408 |
| 22726197 | FADQDDIGNVSFDR        |                  | sporulation-induced transcript 4-associated protein [Mus musculus]                      | 1598.7305 | 35.05  | 0.337990843 |
| 31560613 | FAEAFEAIPIR           |                  | chaperonin subunit 8 (theta) [Mus musculus]                                             | 1150.5876 | 37.53  | 0.447066012 |
| 30425112 | FAEVYFAQSQQK          |                  | hypothetical protein LOC109154 [Mus musculus]                                           | 1445.7032 | 51.87  | 0.20806398  |
| 6755863  | FAFQAEVNR             |                  | tumor rejection antigen gp96 [Mus musculus]                                             | 1081.5455 | 39.33  | 0.527526335 |
| 7305445  | FAGVDIR               |                  | ribosomal protein S16 [Mus musculus]                                                    | 777.4224  | 40.91  | 0.3946452   |
| 5970949  | FAIQDISVEETSAK        |                  | actinin alpha 2 [Mus musculus]                                                          | 1537.7716 | 79.7   | 0.394672219 |
| 11230802 | FAIQDISVEETSAK        |                  | actinin alpha 4 [Mus musculus]                                                          | 1537.7716 | 79.7   | 0.394672219 |
| 31543315 | FAISELFAK             |                  | nucleolin [Mus musculus]                                                                | 1025.5657 | 41.95  | 0.597884425 |
| 7710042  | FALGISAINAVDSDGVDGR   |                  | IQ motif containing GTPase activating protein 1 [Mus musculus]                          | 1890.9564 | 91.34  | 0.382544853 |
| 19482160 | FALITWIGEDVSLQR       |                  | coactosin-like 1 [Mus musculus]                                                         | 1804.964  | 64.42  | 0.693579481 |
| 6754984  | FALMYEGR              |                  | 3'-phosphoadenosine 5'-phosphosulfate synthase 2 [Mus musculus]                         | 986.4827  | 32.42  | 1.392155209 |
| 6753240  | FAMEPEEFDSDTLR        |                  | calcium binding protein, intestinal [Mus musculus]                                      | 1686.7366 | 74.29  | 0.925547489 |
| 6753240  | FAMEPEEFDSDTLR        | Oxidation (M)    | calcium binding protein, intestinal [Mus musculus]                                      | 1702.7118 | 51.19  | 0.256990729 |
| 31982720 | FANILTEACSLQR         |                  | SA rat hypertension-associated homolog [Mus musculus]                                   | 1465.7527 | 26.49  | 0           |
| 30348966 | FANSLVGVQQQLQAFNTYR   |                  | spectrin beta 2 isoform 1 [Mus musculus]                                                | 2184.113  | 23.8   | 0           |
| 7106421  | FANSLVGVQQQLQAFNTYR   |                  | spectrin beta 2 isoform 2 [Mus musculus]                                                | 2184.113  | 23.8   | 0           |
| 63563013 | FAPGYDVCVK            |                  | PREDICTED: mucin 2 [Mus musculus]                                                       | 1098.5251 | 33.38  | 1.754371437 |
| 21704206 | FAPPEAPEPWSGVR        |                  | carboxylesterase 2 [Mus musculus]                                                       | 1539.7638 | 43.25  | 0.39826915  |
| 27370126 | FAPPEAPEPWSGVR        |                  | carboxylesterase 5 [Mus musculus]                                                       | 1539.7638 | 43.25  | 0.39826915  |
| 19527178 | FAPPEDPEPWSGVR        |                  | carboxylesterase 6 [Mus musculus]                                                       | 1583.7501 | 32.7   | 0           |
| 51772153 | FAQPGSFYEYAMR         |                  | PREDICTED: similar to Non-POU-domain-containing, octamer binding protein [Mus musculus] | 1695.7533 | 37.8   | 0.794129762 |
| 33563250 | FASEANGYQDNIR         |                  | desmin [Mus musculus]                                                                   | 1555.7183 | 70.18  | 0.109621619 |
| 33563250 | FASEANGYQDNIR         | Deamidation (NQ) | desmin [Mus musculus]                                                                   | 1556.7051 | 113.3  | 0.256049945 |
| 63476037 | FASEIVDTVYEDGDSIR     |                  | PREDICTED: procollagen, type VI, alpha 3 [Mus musculus]                                 | 1915.894  | 100.72 | 0.091531889 |
| 29244176 | FASFIDK               |                  | hypothetical protein 4732456N10 [Mus musculus]                                          | 827.4299  | 45.28  | 0.572450355 |
| 482387   | FASFIDK               |                  | keratin, 67K type II epidermal - human                                                  | 827.4299  | 45.28  | 0.572450355 |
| 33563238 | FASFIDK               |                  | keratin complex 2, basic, gene 16 [Mus musculus]                                        | 827.4299  | 45.28  | 0.572450355 |
| 6678643  | FASFIDK               |                  | keratin complex 2, basic, gene 1 [Mus musculus]                                         | 827.4299  | 45.28  | 0.572450355 |
| 47523977 | FASFIDK               |                  | keratin complex 2, basic, gene 35 [Mus musculus]                                        | 827.4299  | 45.28  | 0.572450355 |
| 51092293 | FASFIDK               |                  | keratin complex 2, basic, gene 39 [Mus musculus]                                        | 827.4299  | 45.28  | 0.572450355 |
| 14861854 | FASFIDK               |                  | keratin complex 2, basic, gene 7 [Mus musculus]                                         | 827.4299  | 45.28  | 0.572450355 |
| 13624315 | FASFIDK               |                  | keratin complex 2, basic, gene 8 [Mus musculus]                                         | 827.4299  | 45.28  | 0.572450355 |
| 29789317 | FASFIDK               |                  | keratinocyte associated protein 1 [Mus musculus]                                        | 827.4299  | 45.28  | 0.572450355 |
| 125098   | FASFIDK               |                  | Keratin, type II cytoskeletal 3 (Cytokeratin 3) (K3) (CK3) (65 kDa cytoke               | 827.4299  | 45.28  | 0.572450355 |
| 1346345  | FASFIDK               |                  | Keratin, type II cytoskeletal 6B (Cytokeratin 6B) (CK 6B) (K6b keratin)                 | 827.4299  | 45.28  | 0.572450355 |
| 20903595 | FASFIDK               |                  | PREDICTED: RIKEN cDNA 2310001L23 [Mus musculus]                                         | 827.4299  | 45.28  | 0.572450355 |
| 63565108 | FASFIDK               |                  | PREDICTED: similar to cytoke                                                            | 827.4299  | 45.28  | 0.572450355 |
| 31560611 | FASQQGMTAYGTR         |                  | calponin 1 [Mus musculus]                                                               | 1417.6719 | 107.7  | 0           |
| 31560611 | FASQQGMTAYGTR         | Oxidation (M)    | calponin 1 [Mus musculus]                                                               | 1433.6447 | 23.74  | 0.131641873 |
| 13937355 | FAVYLPPQAESGK         |                  | esterase D/formylglutathione hydrolase [Mus musculus]                                   | 1406.7236 | 36.6   | 0           |
| 22203747 | FAYNQLIK              |                  | procollagen, type VI, alpha 2 [Mus musculus]                                            | 996.547   | 47.69  | 0.291427949 |
| 10946574 | FCTGLTQIETLFK         |                  | creatine kinase, brain [Mus musculus]                                                   | 1500.7745 | 48.44  | 0.125725428 |
| 6679299  | FDAGELITQR            |                  | prohibitin [Mus musculus]                                                               | 1149.5928 | 44.99  | 0           |
| 31981690 | FDDAVVQSDMK           |                  | heat shock protein 8 [Mus musculus]                                                     | 1254.5654 | 32.23  | 0           |
| 63664182 | FDDAVVQSDMK           |                  | PREDICTED: similar to heat shock protein 8 [Mus musculus]                               | 1254.5654 | 32.23  | 0           |
| 31981690 | FDDAVVQSDMK           | Oxidation (M)    | heat shock protein 8 [Mus musculus]                                                     | 1270.5712 | 24.34  | 1.231684155 |
| 63664182 | FDDAVVQSDMK           | Oxidation (M)    | PREDICTED: similar to heat shock protein 8 [Mus musculus]                               | 1270.5712 | 24.34  | 1.231684155 |
| 31560653 | FDEAIQLR              |                  | phosphofructokinase, liver, B-type [Mus musculus]                                       | 991.5245  | 24.52  | 0           |
| 20330802 | FDEFFSQGCAPGYEK       |                  | transferrin [Mus musculus]                                                              | 1724.7355 | 52.16  | 0.341818089 |
| 63650172 | FDETEQALANER          |                  | PREDICTED: DEAD box polypeptide 46 [Mus musculus]                                       | 1422.6573 | 65.75  | 0.452626951 |
| 34740335 | FDGALNVDLTFEQTNLVPYPR |                  | tubulin, alpha 2 [Mus musculus]                                                         | 2409.217  | 95.46  | 0.372046734 |
| 6678467  | FDGALNVDLTFEQTNLVPYPR |                  | tubulin, alpha 4 [Mus musculus]                                                         | 2409.217  | 95.46  | 0.372046734 |
| 6678469  | FDGALNVDLTFEQTNLVPYPR |                  | tubulin, alpha 6 [Mus musculus]                                                         | 2409.217  | 95.46  | 0.372046734 |
| 7657067  | FDGILTEGEGPR          |                  | ERO1-like [Mus musculus]                                                                | 1290.6136 | 27.46  | 0           |
| 56119103 | FDLGQDVIDFTGHSLALYR   |                  | guanosine diphosphate (GDP) dissociation inhibitor 3 [Mus musculus]                     | 2167.0752 | 25.67  | 0.716424835 |
| 63562017 | FDLGQDVIDFTGHSLALYR   |                  | PREDICTED: similar to GDP dissociation inhibitor 2 [Mus musculus]                       | 2167.0752 | 25.67  | 0.716424835 |
| 51767507 | FDLMYAK               |                  | PREDICTED: similar to tubulin, alpha-like 3 [Mus musculus]                              | 887.4374  | 41.25  | 0.31984234  |
| 34740335 | FDLMYAK               |                  | tubulin, alpha 2 [Mus musculus]                                                         | 887.4374  | 41.25  | 0.31984234  |
| 6678467  | FDLMYAK               |                  | tubulin, alpha 4 [Mus musculus]                                                         | 887.4374  | 41.25  | 0.31984234  |

|          |                            |                                                                                                         |           |        |             |
|----------|----------------------------|---------------------------------------------------------------------------------------------------------|-----------|--------|-------------|
| 6678469  | FDLMYAK                    | tubulin, alpha 6 [Mus musculus]                                                                         | 887.4374  | 41.25  | 0.31984234  |
| 13385280 | FDQLFDDSEDPFEVLK           | PAI-1 mRNA-binding protein [Mus musculus]                                                               | 1943.906  | 49.9   | 0.379690841 |
| 33598964 | FDQLLAEEK                  | myosin heavy chain 10, non-muscle [Mus musculus]                                                        | 1092.5571 | 35.61  | 0           |
| 7305295  | FDQLLAEEK                  | myosin, heavy polypeptide 11, smooth muscle [Mus musculus]                                              | 1092.5571 | 35.61  | 0           |
| 20137006 | FDQLLAEEK                  | myosin, heavy polypeptide 9, non-muscle [Mus musculus]                                                  | 1092.5571 | 35.61  | 0           |
| 29336026 | FDQLLAEEK                  | nonmuscle myosin heavy chain [Mus musculus]                                                             | 1092.5571 | 35.61  | 0           |
| 6677805  | FDGNLCLMVTGGANLGR          | ribosomal protein S4, X-linked [Mus musculus]                                                           | 1725.8033 | 119.43 | 0.452714195 |
| 21704020 | FEAPLFNAR                  | NADH dehydrogenase (ubiquinone) Fe-S protein 1 [Mus musculus]                                           | 1064.5553 | 33.88  | 1.290582343 |
| 63635087 | FEDESDDDVPR                | PREDICTED: RNA binding motif protein 25 [Mus musculus]                                                  | 1323.554  | 47.61  | 0           |
| 6679439  | FEDENFILK                  | peptidylprolyl isomerase A [Mus musculus]                                                               | 1154.5703 | 59.24  | 0.432742813 |
| 10092608 | FEDGDLTLYQSNAILR           | glutathione S-transferase, pi 1 [Mus musculus]                                                          | 1854.918  | 86.88  | 0.293759279 |
| 28173550 | FEDYLNAESR                 | cell division cycle 10 homolog [Mus musculus]                                                           | 1243.563  | 37.86  | 2.367712779 |
| 63655551 | FEENAPNYSSAR               | PREDICTED: methylcrotonoyl-Coenzyme A carboxylase 2 (beta) [Mus musculus]                               | 1548.6661 | 38.71  | 0           |
| 33563270 | FEFLQR                     | oxoglutarate dehydrogenase (lipoamide) [Mus musculus]                                                   | 968.4835  | 30.6   | 0.338137169 |
| 50080209 | FEELCSDLFR                 | heat shock protein 1A [Mus musculus]                                                                    | 1258.5859 | 37.37  | 0           |
| 31981690 | FEELNADLFR                 | heat shock protein 8 [Mus musculus]                                                                     | 1253.6108 | 50.61  | 0.55939141  |
| 31981722 | FEELNMDLFR                 | heat shock 70kD protein 5 (glucose-regulated protein) [Mus musculus]                                    | 1313.6243 | 56.75  | 0           |
| 31981722 | FEELNMDLFR                 | heat shock 70kD protein 5 (glucose-regulated protein) [Mus musculus]                                    | 1329.6117 | 26.22  | 0.54408869  |
| 22203755 | FEELTNLIR                  | eukaryotic translation initiation factor 3, subunit 8 [Mus musculus]                                    | 1134.6122 | 40.77  | 0           |
| 23510263 | FEENAPAQSTGVR              | microtubule associated monooxygenase, calponin and LIM domain containing 3 [Mus musculus]               | 1405.6707 | 26.59  | 0           |
| 6678355  | FEPPAPLSYDSR               | tight junction protein 1 [Mus musculus]                                                                 | 1410.6615 | 25.25  | 0.212876521 |
| 9790073  | FEQVYNIPIR                 | cadherin 17 [Mus musculus]                                                                              | 1407.73   | 56.63  | 0.42205566  |
| 38090154 | FEFTPGR                    | PREDICTED: oxidative-stress responsive 1 [Mus musculus]                                                 | 853.4218  | 31.93  | 0.449304295 |
| 8394347  | FEFTPGR                    | serine/threonine kinase 39, STE20/SPS1 homolog [Mus musculus]                                           | 853.4218  | 31.93  | 0.449304295 |
| 6678331  | FEIFPTR                    | transglutaminase 3, E polypeptide [Mus musculus]                                                        | 909.4838  | 29.48  | 0           |
| 6671557  | FEIPYFTTSGIQVR             | adaptor-related protein complex AP-1, mu subunit 1 [Mus musculus]                                       | 1657.8605 | 28.77  | 0           |
| 6753072  | FEIPYFTVSGIQVR             | adaptor protein complex AP-1, mu 2 subunit [Mus musculus]                                               | 1655.8796 | 52.06  | 0.432161607 |
| 58037117 | FEIVYNLLSLR                | NADH dehydrogenase (ubiquinone) Fe-S protein 3 [Mus musculus]                                           | 1366.777  | 35.58  | 0.397017509 |
| 13385374 | FEIWDTAGQER                | RAB5A, member RAS oncogene family [Mus musculus]                                                        | 1351.6384 | 58.85  | 0.382765567 |
| 29789257 | FEIWDTAGQER                | RAB5C, member RAS oncogene family [Mus musculus]                                                        | 1351.6384 | 58.85  | 0.382765567 |
| 34996495 | FELDTSER                   | ribophorin II [Mus musculus]                                                                            | 996.4647  | 39.33  | 0           |
| 31981690 | FELTGIPPAPR                | heat shock protein 8 [Mus musculus]                                                                     | 1197.6539 | 28.79  | 0.479945422 |
| 27151748 | FEQAFYTYDTSSSILTLAIR       | nodal modulator 1 [Mus musculus]                                                                        | 2524.2419 | 26.8   | 0           |
| 57634518 | FESDPATHNEPGVR             | septin 11 [Mus musculus]                                                                                | 1555.7164 | 45.23  | 0           |
| 30348966 | FESLEPEMNNQASR             | spectrin beta 2 isoform 1 [Mus musculus]                                                                | 1651.7433 | 77.09  | 0           |
| 7106421  | FESLEPEMNNQASR             | spectrin beta 2 isoform 2 [Mus musculus]                                                                | 1651.7433 | 77.09  | 0           |
| 21313308 | FESPEVAER                  | heterogeneous nuclear ribonucleoprotein M [Mus musculus]                                                | 1063.5061 | 29.71  | 0.417252998 |
| 9790069  | FEVNISELPEIDISSYIEQTR      | HLA-B-associated transcript 1A [Mus musculus]                                                           | 2597.2585 | 78.28  | 0.356578359 |
| 38372907 | FEVNVAELEPEEIDISTYIEQSR    | DEAD (Asp-Glu-Ala-Asp) box polypeptide 39 [Mus musculus]                                                | 2581.2646 | 22.1   | 0.552453744 |
| 33859650 | FEWDLPLDGLTR               | membrane bound C2 domain containing protein [Mus musculus]                                              | 1461.74   | 45.05  | 0.514682041 |
| 7305155  | FFADLLDYIK                 | hypoxanthine guanine phosphoribosyl transferase 1 [Mus musculus]                                        | 1244.6554 | 50.51  | 0.329136461 |
| 6678145  | FFDEESYSLLR                | signal sequence receptor, delta [Mus musculus]                                                          | 1405.6659 | 83.05  | 0.435944152 |
| 63641940 | FFDQYR                     | PREDICTED: desmoplakin [Mus musculus]                                                                   | 875.4084  | 29.2   | 0.519784826 |
| 13385998 | FFEDYGLFMR                 | TNF receptor-associated protein 1 [Mus musculus]                                                        | 1324.6083 | 32.23  | 0.492183557 |
| 30409988 | FFIEEMIR                   | galactose-4-epimerase, UDP [Mus musculus]                                                               | 1084.5554 | 32.1   | 0.42148206  |
| 6677699  | FFPEDVSEELIQEITQR          | radixin [Mus musculus]                                                                                  | 2080.0254 | 36.66  | 0           |
| 16716471 | FFQELPASDSAFK              | hypothetical protein LOC94184 [Mus musculus]                                                            | 1486.7181 | 72.37  | 0           |
| 8567336  | FFTAFDANGR                 | chloride channel calcium activated 3 [Mus musculus]                                                     | 1145.5393 | 55.96  | 0.088084133 |
| 8567336  | FFTAFDANGR                 | chloride channel calcium activated 3 [Mus musculus]                                                     | 1146.5293 | 53.62  | 0           |
| 31559883 | FFTEEVDSR                  | very-long-chain acyl-CoA dehydrogenase VLCAD homolog [Mus musculus]                                     | 1129.5209 | 35.64  | 0           |
| 63589703 | FFYSDQNVDSR                | PREDICTED: talin 2 [Mus musculus]                                                                       | 1377.6133 | 68.82  | 0.214674257 |
| 6755809  | FFYSDQNVDSR                | talin 1 [Mus musculus]                                                                                  | 1377.6133 | 68.82  | 0.214674257 |
| 7305305  | FGDMQEIIQNFVR              | N-myc downstream regulated gene 2 [Mus musculus]                                                        | 1596.7904 | 29.06  | 0           |
| 19526818 | FGFYEVFK                   | solute carrier family 25 (mitochondrial carrier, phosphate carrier), member 3 [Mus musculus]            | 1036.511  | 45.71  | 0.291698591 |
| 63746482 | FGGEHVPNSPFQVTLAGDQPVTQPLR | PREDICTED: filamin, alpha [Mus musculus]                                                                | 2963.4897 | 22.27  | 0           |
| 21704096 | FGGNPGGFGNQGGFGNSR         | TAR DNA binding protein isoform 1 [Mus musculus]                                                        | 1726.7734 | 97.02  | 0.466318447 |
| 33563270 | FGLEGCEVLIPALK             | oxoglutarate dehydrogenase (lipoamide) [Mus musculus]                                                   | 1488.8125 | 38.28  | 0           |
| 13384736 | FGNPLLVDQVSEYDPLNPLNLR     | dynein, cytoplasmic, heavy chain 1 [Mus musculus]                                                       | 2598.3552 | 72.18  | 0.245951521 |
| 23956214 | FGQGGAGPVGQGGPR            | splicing factor proline/glutamine rich (polypyrimidine tract binding protein associated) [Mus musculus] | 1341.6707 | 94.12  | 0.504233417 |
| 7710084  | FGQVPDQLGGLR               | prolactin regulatory element binding protein [Mus musculus]                                             | 1286.6917 | 34.38  | 0.473390789 |

Oxidation (M)

Deamidation (NQ)

|          |                         |                    |                                                                                                          |           |        |             |
|----------|-------------------------|--------------------|----------------------------------------------------------------------------------------------------------|-----------|--------|-------------|
| 31981562 | FGVEQDQDMVFASFIR        |                    | pyruvate kinase 3 [Mus musculus]                                                                         | 1859.9033 | 97.18  | 0           |
| 31981562 | FGVEQDQDMVFASFIR        | Oxidation (M)      | pyruvate kinase 3 [Mus musculus]                                                                         | 1875.8918 | 40.41  | 0           |
| 31543315 | FGYVDFESAEDLEK          |                    | nucleolin [Mus musculus]                                                                                 | 1648.7633 | 82.89  | 0.250632979 |
| 6671690  | FHQLDIDNPQSIR           |                    | carbonyl reductase 1 [Mus musculus]                                                                      | 1582.7915 | 27.55  | 1.425225164 |
| 52317152 | FIGPVTYSEAPR            |                    | phospholipase A2, group IVC (cytosolic, calcium-independent) [Mus musculus]                              | 1465.7341 | 35.08  | 0           |
| 6678097  | FIGPVTYSEAPR            |                    | serine (or cysteine) proteinase inhibitor, clade B, member 6a [Mus musculus]                             | 851.4461  | 35.87  | 0.453879184 |
| 6679237  | FIGPSPVVR               |                    | pyruvate carboxylase [Mus musculus]                                                                      | 1100.6053 | 32.97  | 0.306109474 |
| 31981327 | FILNLPFVSFR             |                    | proteasome (prosome, macropain) subunit, beta type 2 [Mus musculus]                                      | 1306.754  | 28.52  | 0.347045853 |
| 6755002  | FIQQTYPSSGGEEQAQYCR     |                    | programmed cell death 6 interacting protein [Mus musculus]                                               | 2104.9453 | 59.76  | 0.345978379 |
| 6679687  | FISDKDASVVGFFR          |                    | glucose regulated protein [Mus musculus]                                                                 | 1587.8214 | 37.76  | 0           |
| 6753138  | FIWNSEK                 |                    | Na+/K+ -ATPase beta 1 subunit [Mus musculus]                                                             | 923.4601  | 30.09  | 0           |
| 18079339 | FKLEAPDADELPR           |                    | aconitase 2, mitochondrial [Mus musculus]                                                                | 1500.7678 | 31.81  | 0           |
| 31560680 | FLAEEGFYK               |                    | integral membrane protein 1 [Mus musculus]                                                               | 1103.5552 | 30.46  | 0.355751137 |
| 6677903  | FLDASQYSAAGGSSVVR       |                    | SEC8 [Mus musculus]                                                                                      | 1615.7836 | 37.77  | 1.621053521 |
| 14149647 | FLDGIYVSEK              |                    | ribosomal protein L9 [Mus musculus]                                                                      | 1170.5908 | 35.46  | 0.524296142 |
| 33563270 | FLDTAFDLDAFK            |                    | oxoglutarate dehydrogenase (lipoamide) [Mus musculus]                                                    | 1402.6901 | 75.9   | 0           |
| 6753598  | FLEEYLSSTPQR            |                    | defender against cell death 1 [Mus musculus]                                                             | 1469.7291 | 49.9   | 0.956391793 |
| 31982275 | FLEMCDLLAR              |                    | heat shock protein 4 [Mus musculus]                                                                      | 1325.6284 | 38.36  | 0           |
| 33563250 | FLEQQNAALAAEVNR         |                    | desmin [Mus musculus]                                                                                    | 1673.8611 | 104.67 | 0.1144656   |
| 33563250 | FLEQQNAALAAEVNR         | 2 Deamidation (NQ) | desmin [Mus musculus]                                                                                    | 1675.8461 | 47.38  | 0           |
| 33563250 | FLEQQNAALAAEVNR         | Deamidation (NQ)   | desmin [Mus musculus]                                                                                    | 1674.8372 | 46.8   | 2.391974263 |
| 482387   | FLEQQNQVLQTK            |                    | keratin, 67K type II epidermal - human                                                                   | 1475.7791 | 72.23  | 0.350535478 |
| 51092293 | FLEQQNQVLQTK            |                    | keratin complex 2, basic, gene 39 [Mus musculus]                                                         | 1475.7791 | 72.23  | 0.350535478 |
| 1346343  | FLEQQNQVLQTK            |                    | Keratin, type II cytoskeletal 1 (Cytokeratin 1) (K1) (CK 1) (67 kDa cytoke-<br>ratin) (Hair alpha protei | 1475.7791 | 72.23  | 0.350535478 |
| 41322904 | FLEVQYLTGGGLIEPDPGR     |                    | plectin 1 isoform 1 [Mus musculus]                                                                       | 2105.0903 | 64.14  | 0.525808572 |
| 45387933 | FLFVDADQIVR             |                    | UDP-glucose ceramide glucosyltransferase-like 1 [Mus musculus]                                           | 1322.7119 | 41.48  | 0.472995512 |
| 22164798 | FLHDPSATQGFVGCALSSNIQR  |                    | selenium binding protein 1 [Mus musculus]                                                                | 2348.1445 | 53.89  | 0.161239133 |
| 31981246 | FLIDGFPR                |                    | UMP-CMP kinase [Mus musculus]                                                                            | 964.5255  | 43.12  | 0.430012383 |
| 31981892 | FLLDHQGELFPSTDAQGV      |                    | Rho GTPase activating protein 1 [Mus musculus]                                                           | 1973.9708 | 30.02  | 0           |
| 6680309  | FLPLFDR                 |                    | heat shock protein 1 (chaperonin 10) [Mus musculus]                                                      | 907.5062  | 24.38  | 0.412044622 |
| 63618296 | FLQDSSPSEELAR           |                    | PREDICTED: similar to E330039G21Rik protein [Mus musculus]                                               | 1478.7111 | 29.07  | 1.241068139 |
| 31980648 | FLSQPFQVAEVFTGHMGK      |                    | ATP synthase, H+ transporting mitochondrial F1 complex, beta subunit [Mus musculus]                      | 2023.0038 | 54.77  | 0           |
| 7106429  | FLSQPQVTR               |                    | synaptogyrin 2 [Mus musculus]                                                                            | 1174.6556 | 33.38  | 0           |
| 29789191 | FLSWILNR                |                    | asparaginyl-tRNA synthetase [Mus musculus]                                                               | 1048.6013 | 35.49  | 0.561796766 |
| 6755002  | FLTALAQDGVINEEALSVTELDR |                    | programmed cell death 6 interacting protein [Mus musculus]                                               | 2504.2822 | 32.57  | 0.361304042 |
| 6753618  | FLTEELSLDQDR            |                    | D-dopachrome tautomerase [Mus musculus]                                                                  | 1465.7194 | 60.55  | 0           |
| 29336026 | FLTNGPSSSPGQER          |                    | nonmuscle myosin heavy chain [Mus musculus]                                                              | 1476.7094 | 70.22  | 0.473727634 |
| 29336026 | FLTNGPSSSPGQER          | Deamidation (NQ)   | nonmuscle myosin heavy chain [Mus musculus]                                                              | 1477.7043 | 50.54  | 0           |
| 46849812 | FLTTTTPNLLVSWQAPR       |                    | fibronectin 1 [Mus musculus]                                                                             | 1931.0349 | 22.42  | 0           |
| 19527256 | FLVLDEADGLLSQGYSDFINR   |                    | DEAD (Asp-Glu-Ala-Asp) box polypeptide 1 [Mus musculus]                                                  | 2372.1792 | 80.2   | 0.488175229 |
| 50838806 | FMLQDVIDLR              |                    | eukaryotic translation initiation factor 4 gamma, 3 [Mus musculus]                                       | 1249.6637 | 37.97  | 0           |
| 9790069  | FMQDPMEIFVDDTEK         |                    | HLA-B-associated transcript 1A [Mus musculus]                                                            | 1844.8203 | 49.21  | 0.884060411 |
| 13384828 | FMTEDTTDAPFR            |                    | serine (or cysteine) proteinase inhibitor, clade B, member 1a [Mus musculus]                             | 1430.6266 | 71.4   | 0           |
| 13384828 | FMTEDTTDAPFR            | Oxidation (M)      | serine (or cysteine) proteinase inhibitor, clade B, member 1a [Mus musculus]                             | 1446.6068 | 38.88  | 0.341429402 |
| 16418339 | FNADEFEDMVAEK           |                    | ribosomal protein 10 [Mus musculus]                                                                      | 1544.6703 | 26.77  | 1.237486172 |
| 6671622  | FNASQLITQR              |                    | B-cell receptor-associated protein 37 [Mus musculus]                                                     | 1177.6309 | 41.74  | 0.353301297 |
| 63540743 | FNDEHIPDSPFVVPVASLSDAR  |                    | PREDICTED: filamin C, gamma [Mus musculus]                                                               | 2527.2075 | 64.89  | 0           |
| 63660302 | FNDEHIPDSPYLVPVIAPSDDAR |                    | PREDICTED: filamin B, beta [Mus musculus]                                                                | 2567.2388 | 53.29  | 0.442231429 |
| 63746482 | FNEEHIPDSPFVVPVSPSGDAR  |                    | PREDICTED: filamin, alpha [Mus musculus]                                                                 | 2467.1816 | 83.34  | 0.133466273 |
| 47578123 | FNFLEQAFDK              | Deamidation (NQ)   | potassium channel tetramerisation domain containing 12 [Mus musculus]                                    | 1259.5968 | 43.3   | 0.776684565 |
| 18079339 | FNPETDFLTGK             |                    | aconitase 2, mitochondrial [Mus musculus]                                                                | 1268.6138 | 66.79  | 0.195605444 |
| 51769759 | FNPFVTSR                |                    | PREDICTED: similar to 60S ribosomal protein L26-like 1 [Mus musculus]                                    | 1082.5271 | 47.23  | 0.51161011  |
| 31542151 | FNQDPEAEDEGR            |                    | arginine-tRNA-protein transferase 1 [Mus musculus]                                                       | 1406.5839 | 43.42  | 0.329745588 |
| 27228985 | FNVSATPEQYVPYSTTR       |                    | 13kDa differentiation-associated protein [Mus musculus]                                                  | 1959.9489 | 45.93  | 0           |
| 6678365  | FNWWDTAGQEK             |                    | RAN, member RAS oncogene family [Mus musculus]                                                           | 1294.6135 | 70.27  | 0.414052863 |
| 6680724  | FNWWDVGGQDK             |                    | ADP-ribosylation factor 6 [Mus musculus]                                                                 | 1264.5975 | 40.04  | 0.671747792 |
| 13384736 | FNYGFEYLVGQDK           |                    | dynein, cytoplasmic, heavy chain 1 [Mus musculus]                                                        | 1579.7469 | 37.22  | 0.92409848  |
| 19527018 | FPEDGPELEEVLQIAAADAR    |                    | dipeptidylpeptidase III [Mus musculus]                                                                   | 2283.1563 | 23.71  | 0.465254971 |
| 30911099 | FPQLDDTSFANSR           |                    | fatty acid synthase [Mus musculus]                                                                       | 1497.6987 | 97.55  | 0.632906849 |
| 8567336  | FPPSPVTVYASIR           |                    | chloride channel calcium activated 3 [Mus musculus]                                                      | 1336.7278 | 73.45  | 0.120249456 |

|          |                     |                                                                                                     |           |        |             |
|----------|---------------------|-----------------------------------------------------------------------------------------------------|-----------|--------|-------------|
| 31981828 | FPVFNMSYNAENAVLLCTR | coatamer protein complex subunit alpha [Mus musculus]                                               | 2286.1145 | 25.32  | 0           |
| 51491880 | FQAEIPDR            | metastasis-associated protein 2 [Mus musculus]                                                      | 975.4892  | 27.18  | 0           |
| 40254595 | FQLTDSQIYEVLSVIR    | dihydropyrimidinase-like 2 [Mus musculus]                                                           | 1911.026  | 100.06 | 0.296966883 |
| 40254595 | FQMPDQGMTSADFFQGTK  | dihydropyrimidinase-like 2 [Mus musculus]                                                           | 2150.9292 | 100.16 | 0           |
| 6679599  | FQSLGVAFYR          | RAB7, member RAS oncogene family [Mus musculus]                                                     | 1187.623  | 46.82  | 0.470624653 |
| 21746142 | FSADYFIPR           | zinc finger and BTB domain containing 8 opposite strand [Mus musculus]                              | 1244.5878 | 27.01  | 0.443223593 |
| 6753282  | FSFEQPEFR           | caspase 1 [Mus musculus]                                                                            | 1186.5583 | 26.93  | 0.431027025 |
| 23943876 | FSHSGNQLDGPITAFR    | zymogen granule membrane protein 16 [Mus musculus]                                                  | 1746.8584 | 46.48  | 0.413224824 |
| 6678499  | FSLQDPPNK           | UDP-glucose dehydrogenase [Mus musculus]                                                            | 1045.5305 | 42.26  | 0.502689336 |
| 31541909 | FSMVLPEVEAALAEIPGVR | isochorimatase domain containing 1 [Mus musculus]                                                   | 2028.0856 | 29.64  | 1.409292452 |
| 6671539  | FSNEEIAMATVTALR     | aldolase 1, A isoform [Mus musculus]                                                                | 1652.8346 | 125.37 | 0.709639172 |
| 13386146 | FSNQETSVEIGESVR     | phosphoribosyl pyrophosphate synthetase 2 [Mus musculus]                                            | 1681.7994 | 36.12  | 0.405310998 |
| 16716471 | FSPLMTAEGLGTR       | hypothetical protein LOC94184 [Mus musculus]                                                        | 1379.6958 | 54.92  | 1.297058708 |
| 28893559 | FSPPEETGFSR         | melanoma inhibitory activity 3 [Mus musculus]                                                       | 1203.567  | 44.21  | 0.439559012 |
| 21450241 | FSSQEAASSFQDGR      | propionyl-Coenzyme A carboxylase, alpha polypeptide [Mus musculus]                                  | 1503.6364 | 119.52 | 0.181374709 |
| 54020742 | FSTETTLFLVDKYEIL    | archain 1 [Mus musculus]                                                                            | 1805.9117 | 22.18  | 0           |
| 19527018 | FSTIASSYEECR        | dipeptidylpeptidase III [Mus musculus]                                                              | 1392.6182 | 30.07  | 2.080341402 |
| 31981570 | FSVLITGLR           | polymeric immunoglobulin receptor [Mus musculus]                                                    | 1005.6133 | 27.67  | 0.416368487 |
| 33859482 | FSVSPVVR            | eukaryotic translation elongation factor 2 [Mus musculus]                                           | 890.5081  | 31.91  | 0.461141913 |
| 9790073  | FTFALGR             | cadherin 17 [Mus musculus]                                                                          | 811.4487  | 27.11  | 0.449683293 |
| 31560560 | FTPGTFTNQIAAFR      | laminin receptor 1 (ribosomal protein SA) [Mus musculus]                                            | 1698.8674 | 66.16  | 1.168669888 |
| 31980648 | FTQAGSEVSALLGR      | ATP synthase, H+ transporting mitochondrial F1 complex, beta subunit [Mus musculus]                 | 1435.7542 | 108.46 | 0.353768008 |
| 7106435  | FTDLDSPR            | tenascin C [Mus musculus]                                                                           | 1051.5151 | 24.44  | 0.46282645  |
| 6755100  | FTVLLMPNGPMR        | proliferation-associated 2G4 [Mus musculus]                                                         | 1375.7222 | 26.65  | 0.697406698 |
| 7305295  | FVADLWK             | myosin, heavy polypeptide 11, smooth muscle [Mus musculus]                                          | 878.4724  | 34.05  | 0           |
| 9790067  | FVDGEWYR            | staphylococcal nuclease domain containing 1 [Mus musculus]                                          | 1071.4971 | 39.93  | 0.534140195 |
| 33469063 | FVEFFGPGVAQLSIADR   | aconitase 1 [Mus musculus]                                                                          | 1852.9615 | 59.14  | 0.379421408 |
| 31982178 | FVEGLPINDFSR        | malate dehydrogenase 1, NAD (soluble) [Mus musculus]                                                | 1393.7174 | 68.53  | 0.400052038 |
| 7949029  | FVGQDVEGER          | CTP synthase [Mus musculus]                                                                         | 1135.5399 | 40.38  | 0.663826753 |
| 21704144 | FVIGGPQGDAGLTGR     | methionine adenosyltransferase II, alpha [Mus musculus]                                             | 1444.7568 | 64     | 2.50561517  |
| 6679687  | FVMQEEFSR           | glucose regulated protein [Mus musculus]                                                            | 1172.5435 | 41.8   | 0           |
| 6679753  | FVNVPVTFGK          | Finkel-Biskis-Reilly murine sarcoma virus (FBR-MuSV) ubiquitously expressed (fox derived) [Mus musc | 1107.6139 | 55.03  | 0.426009429 |
| 7305395  | FVSILMESIPLPDR      | purine-nucleoside phosphorylase [Mus musculus]                                                      | 1616.8751 | 45.81  | 1.154199334 |
| 6680606  | FVTSSSGSYGGVR       | keratin complex 1, acidic, gene 19 [Mus musculus]                                                   | 1303.6283 | 123.29 | 0.433683637 |
| 6754036  | FVTVQTISGTGALR      | glutamate oxaloacetate transaminase 2, mitochondrial [Mus musculus]                                 | 1449.8041 | 59.1   | 0.258797093 |
| 58037465 | FWYFVSQLK           | Ribosomal protein L18A [Mus musculus]                                                               | 1217.6372 | 68.06  | 0.458547727 |
| 33859482 | FYAFGR              | eukaryotic translation elongation factor 2 [Mus musculus]                                           | 760.3804  | 24.58  | 0.504861023 |
| 40556608 | FYEAFSK             | heat shock protein 1, beta [Mus musculus]                                                           | 891.4227  | 33.37  | 0.475906512 |
| 6754254  | FYEQFSK             | heat shock protein 1, alpha [Mus musculus]                                                          | 948.4596  | 28.73  | 0.224902896 |
| 51771441 | FYEQFSK             | PREDICTED: similar to heat shock protein 1, alpha [Mus musculus]                                    | 948.4596  | 28.73  | 0.224902896 |
| 54287684 | FYEQMNGPVTSGR       | eukaryotic translation elongation factor 1 delta isoform b [Mus musculus]                           | 1572.7123 | 51.43  | 0           |
| 13384736 | FYFVGDEDLLEIIGNSK   | dynein, cytoplasmic, heavy chain 1 [Mus musculus]                                                   | 1958.9653 | 22.98  | 0           |
| 6755002  | FYNELTEILVR         | programmed cell death 6 interacting protein [Mus musculus]                                          | 1396.749  | 45.27  | 0           |
| 6678571  | FYPEDVAEELIQDITQK   | villin 2 [Mus musculus]                                                                             | 2038.0028 | 84.04  | 0.509094655 |
| 6754750  | FYPEDVSEELIQDITQR   | moesin [Mus musculus]                                                                               | 2082.0068 | 84.73  | 0.521138122 |
| 22122523 | FYQASTSELYGK        | GDP-mannose 4, 6-dehydratase [Mus musculus]                                                         | 1393.6599 | 87.53  | 0.44027731  |
| 33859594 | FYSQAIELNPGNAIYYGNR | protein phosphatase 5, catalytic subunit [Mus musculus]                                             | 2190.0715 | 42.19  | 0.867119213 |
| 33563266 | FYSVNVVYDYSK        | NADH dehydrogenase (ubiquinone) 1 alpha subcomplex, 4 [Mus musculus]                                | 1221.5742 | 43.5   | 1.503918177 |
| 21450351 | GA AFLGLGTDVSR      | cysteine sulfinic acid decarboxylase [Mus musculus]                                                 | 1263.6674 | 29.09  | 0           |
| 10946940 | GAAGALLYVDITR       | RAB2, member RAS oncogene family [Mus musculus]                                                     | 1319.7321 | 30.99  | 0           |
| 63561841 | GAAQNIIPASTGAAK     | PREDICTED: similar to Glyceraldehyde-3-phosphate dehydrogenase (GAPDH) [Mus musculus]               | 1369.7408 | 104.12 | 0.465961011 |
| 6679937  | GAAQNIIPASTGAAK     | similar to glyceraldehyde-3-phosphate dehydrogenase [Mus musculus]                                  | 1369.7408 | 104.12 | 0.465961011 |
| 33239431 | GAAWEEPSSGNGTAR     | RCC1-like [Mus musculus]                                                                            | 1489.677  | 29.85  | 0           |
| 33239431 | GAAWEEPSSGNGTAR     | RCC1-like [Mus musculus]                                                                            | 1490.6567 | 32.57  | 2.88741055  |
| 40549395 | GADV NAPPVPSR       | ankyrin repeat domain protein 17 isoform b [Mus musculus]                                           | 1266.6458 | 26.14  | 0.611201703 |
| 20806532 | GAEANVTGPDGVPVEGSR  | cold shock domain protein A short isoform [Mus musculus]                                            | 1782.8556 | 54.44  | 0.340505247 |
| 6756033  | GAEANVTGPGGVPVQGSK  | nuclease sensitive element binding protein 1 [Mus musculus]                                         | 1695.8643 | 88.19  | 0.434625165 |
| 55741460 | GAEEMETVIPDVVMR     | DJ-1 protein [Mus musculus]                                                                         | 1675.7979 | 58.43  | 0           |
| 7304887  | GAGTDEFTLNR         | annexin A3 [Mus musculus]                                                                           | 1180.5695 | 23.2   | 0           |
| 63746482 | GAGTGGLGLAVEGPSEAK  | PREDICTED: filamin, alpha [Mus musculus]                                                            | 1570.8033 | 110.81 | 0           |

Deamidation (NQ)

|          |                              |                  |                                                                                                      |           |        |             |
|----------|------------------------------|------------------|------------------------------------------------------------------------------------------------------|-----------|--------|-------------|
| 47059123 | GAGVTLNVLEMTADDLENALK        |                  | UDP glucuronosyltransferase 1 family, polypeptide A10 [Mus musculus]                                 | 2174.1074 | 77.02  | 0           |
| 47059123 | GAGVTLNVLEMTADDLENALK        | Oxidation (M)    | UDP glucuronosyltransferase 1 family, polypeptide A10 [Mus musculus]                                 | 2190.1357 | 32.78  | 0           |
| 29293809 | GAIVPAQEVPPPTVPMDYSWAR       |                  | ATP citrate lyase [Mus musculus]                                                                     | 2381.197  | 40.49  | 0.225194914 |
| 7305085  | GALTVGITNTVGGSSISR           |                  | glutamine fructose-6-phosphate transaminase 1 [Mus musculus]                                         | 1632.8855 | 27.64  | 0.267431981 |
| 10946678 | GANIQLLDLPGIIEGAAQGR         |                  | developmentally regulated GTP binding protein 2 [Mus musculus]                                       | 2006.1    | 39.45  | 0.472735853 |
| 7242197  | GAVYSFDPVGSYQR               |                  | proteasome (prosome, macropain) subunit, beta type 1 [Mus musculus]                                  | 1545.7319 | 57.81  | 0.44160875  |
| 31542882 | GAWDWSMLWK                   |                  | UDP-N-acetyl-alpha-D-galactosamine: polypeptide N-acetylgalactosaminyltransferase 7 [Mus musculus]   | 1279.5946 | 34.65  | 0           |
| 51764087 | GAWSNVLR                     |                  | PREDICTED: solute carrier family 25 (mitochondrial carrier, adenine nucleotide translocator), member | 902.4882  | 25.48  | 0.1624527   |
| 22094075 | GAWSNVLR                     |                  | solute carrier family 25, member 5 [Mus musculus]                                                    | 902.4882  | 25.48  | 0.1624527   |
| 9845253  | GAYGGGYGGYDDYGGYNDGYFGSDR    |                  | heterogeneous nuclear ribonucleoprotein H2 [Mus musculus]                                            | 2660.0359 | 57.48  | 0.406422024 |
| 10946928 | GAYGGGYGGYDDYNGYNDGYFGSDR    |                  | heterogeneous nuclear ribonucleoprotein H1 [Mus musculus]                                            | 2717.0459 | 56.39  | 0.422949488 |
| 31982186 | GCDVVVIPAGVPR                |                  | malate dehydrogenase 2, NAD (mitochondrial) [Mus musculus]                                           | 1281.7    | 43.76  | 0.367190755 |
| 6679715  | GDATVSYEDPPTAK               |                  | Ewing sarcoma breakpoint region 1 [Mus musculus]                                                     | 1450.6709 | 54.75  | 0.31351139  |
| 21644581 | GDDDVFNPTNLLLEFLSDR          |                  | UDP-GlcNAc:betaGal beta-1,3-N-acetylglucosaminyltransferase 7 [Mus musculus]                         | 2166.0339 | 108.83 | 0.182355082 |
| 6753484  | GDEGEVGDPPGEDNNDISPR         |                  | procollagen, type VI, alpha 1 [Mus musculus]                                                         | 1971.8273 | 83.84  | 0           |
| 6753484  | GDEGPPGPEGLR                 |                  | procollagen, type VI, alpha 1 [Mus musculus]                                                         | 1180.5601 | 47.52  | 0           |
| 6679078  | GDFCIQVGR                    |                  | nucleoside-diphosphate kinase 2 [Mus musculus]                                                       | 994.4821  | 29.53  | 0.266811036 |
| 6754206  | GDFIALDLGGSSFR               |                  | hexokinase 1 [Mus musculus]                                                                          | 1454.7297 | 81.07  | 0.282895162 |
| 7305143  | GDFLALDLGGTNFR               |                  | hexokinase 2 [Mus musculus]                                                                          | 1495.757  | 59.19  | 0.558632365 |
| 45597447 | GDGPVQGTIHFEQK               |                  | superoxide dismutase 1, soluble [Mus musculus]                                                       | 1512.7463 | 61.09  | 0           |
| 21313554 | GDLLFLTNR                    |                  | Sec11-like 3 [Mus musculus]                                                                          | 1195.6473 | 31.8   | 0.499619666 |
| 6755714  | GDPNWFMK                     |                  | transgelin [Mus musculus]                                                                            | 994.4456  | 27.5   | 0           |
| 30348966 | GDQVSNQGLPAEQGSPR            |                  | spectrin beta 2 isoform 1 [Mus musculus]                                                             | 1739.8356 | 76.76  | 0.377275135 |
| 7106421  | GDQVSNQGLPAEQGSPR            |                  | spectrin beta 2 isoform 2 [Mus musculus]                                                             | 1739.8356 | 76.76  | 0.377275135 |
| 30348966 | GDQVSNQGLPAEQGSPR            | Deamidation (NQ) | spectrin beta 2 isoform 1 [Mus musculus]                                                             | 1740.8302 | 69.49  | 0           |
| 7106421  | GDQVSNQGLPAEQGSPR            | Deamidation (NQ) | spectrin beta 2 isoform 2 [Mus musculus]                                                             | 1740.8302 | 69.49  | 0           |
| 25141233 | GDTDQASNILASFGLSAR           |                  | matrin 3 [Mus musculus]                                                                              | 1822.8967 | 49.5   | 1.552977115 |
| 63650187 | GDVAEGDLIEHFSQFGAVEK         |                  | PREDICTED: similar to heterogeneous nuclear ribonucleoprotein A0 [Mus musculus]                      | 2148.0298 | 39.34  | 1.120746764 |
| 31981562 | GDYPLEAVR                    |                  | pyruvate kinase 3 [Mus musculus]                                                                     | 1019.5142 | 29.41  | 0.507126123 |
| 63660302 | GEAGIPAEFSIWTR               |                  | PREDICTED: filamin B, beta [Mus musculus]                                                            | 1533.7738 | 59.03  | 0.68671042  |
| 31980685 | GEDEAMVESVGLALVK             |                  | glucosamine [Mus musculus]                                                                           | 1717.8752 | 47.46  | 0           |
| 6678986  | GEELLSPLNLEQAAAYAR           |                  | myosin IC [Mus musculus]                                                                             | 1873.9669 | 59.36  | 0.164669465 |
| 27370092 | GEETPVIVGSALCALEQR           |                  | Tu translation elongation factor, mitochondrial [Mus musculus]                                       | 1871.9537 | 84.54  | 1.357773791 |
| 45504394 | GEFFNELVQQQR                 |                  | integrin beta 1 (fibronectin receptor beta) [Mus musculus]                                           | 1423.6991 | 69.49  | 0.188345763 |
| 31982178 | GEFITTVQQR                   |                  | malate dehydrogenase 1, NAD (soluble) [Mus musculus]                                                 | 1178.6202 | 49.96  | 0.316148457 |
| 19526814 | GEFYNEASNLQVAIR              |                  | NADH dehydrogenase (ubiquinone) flavoprotein 1 [Mus musculus]                                        | 1710.8433 | 28.46  | 0           |
| 54607098 | GEGGILINSQGER                |                  | succinate dehydrogenase Fp subunit [Mus musculus]                                                    | 1329.6757 | 35.62  | 0.294611021 |
| 31542956 | GEIAGPPDTPYEGGR              |                  | huntingtin interacting protein 2 [Mus musculus]                                                      | 1515.7095 | 34.88  | 0           |
| 18700024 | GELASYDMQLR                  |                  | isocitrate dehydrogenase 3, beta subunit [Mus musculus]                                              | 1282.6143 | 46.26  | 0           |
| 29336026 | GELEDTLDTNAQQELR             |                  | nonmuscle myosin heavy chain [Mus musculus]                                                          | 1918.9042 | 34.8   | 0           |
| 51592084 | GESEDDFWWCIDR                |                  | hypothetical protein LOC74340 [Mus musculus]                                                         | 1657.666  | 75.5   | 0.412788903 |
| 63738313 | GEYDVTVPR                    |                  | PREDICTED: similar to AHNAK [Mus musculus]                                                           | 1035.5094 | 27.73  | 0.357358448 |
| 8393544  | GFAFVQYVNER                  |                  | heterogeneous nuclear ribonucleoprotein C [Mus musculus]                                             | 1329.6615 | 33.38  | 0.458866731 |
| 31559916 | GFAFVTFDDHDTVDK              |                  | heterogeneous nuclear ribonucleoprotein A3 isoform b [Mus musculus]                                  | 1713.7742 | 70.66  | 0.327003494 |
| 6755296  | GFAFVTFESPADAK               |                  | RNA binding motif protein, X-linked [Mus musculus]                                                   | 1486.7189 | 52.58  | 0.561378321 |
| 6753820  | GFAYVQFEDVR                  |                  | FUS interacting protein (serine-arginine rich) 1 [Mus musculus]                                      | 1330.6493 | 35.52  | 0.392510262 |
| 6679082  | GFDVFNALDLMENK               |                  | N-myrystoyltransferase 1 [Mus musculus]                                                              | 1612.7834 | 44.79  | 0           |
| 6679082  | GFDVFNALDLMENK               | Oxidation (M)    | N-myrystoyltransferase 1 [Mus musculus]                                                              | 1628.7626 | 46.12  | 0           |
| 7549795  | GFEVIEEFDGR                  |                  | tight junction protein 2 [Mus musculus]                                                              | 1297.6208 | 26.69  | 0           |
| 21592285 | GFEVQVTELR                   |                  | keratin 20 [Mus musculus]                                                                            | 1177.6196 | 41.6   | 0.463471642 |
| 40556608 | GFEVVYMTPEIDYCVQQLK          |                  | heat shock protein 1, beta [Mus musculus]                                                            | 2391.1301 | 85.47  | 0           |
| 40556608 | GFEVVYMTPEIDYCVQQLK          | Oxidation (M)    | heat shock protein 1, beta [Mus musculus]                                                            | 2407.1277 | 31.66  | 0           |
| 63641940 | GFFDPNTEENLTYLQLK            |                  | PREDICTED: desmoplakin [Mus musculus]                                                                | 2028.9921 | 56.47  | 0           |
| 41322904 | GFFDPNTEENLTYLQLMER          |                  | plectin 1 isoform 1 [Mus musculus]                                                                   | 2317.0723 | 68.81  | 0.293726309 |
| 37537522 | GFFDPNTHENLTYLQLLER          |                  | epiplakin 1 [Mus musculus]                                                                           | 2307.1362 | 31.28  | 0           |
| 41322904 | GFFDPNTHENLTYLQLLER          |                  | plectin 1 isoform 1 [Mus musculus]                                                                   | 2307.1362 | 31.28  | 0           |
| 31560449 | GFFELFPSVSR                  |                  | aspartyl aminopeptidase [Mus musculus]                                                               | 1285.6626 | 34.77  | 0.334802494 |
| 7304881  | GFFVQPTVFSNVTDENR            |                  | aldehyde dehydrogenase family 1, subfamily A1 [Mus musculus]                                         | 1973.9468 | 47.33  | 0           |
| 7949053  | GFGDGYNGYGGGPGGNGFGGSPGYGGGR |                  | heterogeneous nuclear ribonucleoprotein A2/B1 isoform 1 [Mus musculus]                               | 2495.0405 | 184.46 | 0.422906682 |
| 7949053  | GFGDGYNGYGGGPGGNGFGGSPGYGGGR | Deamidation (NQ) | heterogeneous nuclear ribonucleoprotein A2/B1 isoform 1 [Mus musculus]                               | 2496.0254 | 80.61  | 0.407117776 |

|          |                              |                                                                                                     |           |        |             |
|----------|------------------------------|-----------------------------------------------------------------------------------------------------|-----------|--------|-------------|
| 6681069  | GFGFGQGAGALVHSE              | cysteine and glycine-rich protein 1 [Mus musculus]                                                  | 1433.6792 | 94.64  | 0.113871778 |
| 6754222  | GFGFILFK                     | heterogeneous nuclear ribonucleoprotein A/B [Mus musculus]                                          | 928.5286  | 42     | 0           |
| 6677919  | GFGFVEFEDPR                  | splicing factor, arginine/serine-rich 5 (SRp40, HRS) [Mus musculus]                                 | 1299.6052 | 26.1   | 0.583361407 |
| 31560656 | GFGFVSFER                    | poly A binding protein, cytoplasmic 1 [Mus musculus]                                                | 1045.5179 | 38.51  | 0.453049413 |
| 21312912 | GFGFVSFER                    | polyA binding protein, cytoplasmic homolog [Mus musculus]                                           | 1045.5179 | 38.51  | 0.453049413 |
| 7949053  | GFGFVTFDDHDPVK               | heterogeneous nuclear ribonucleoprotein A2/B1 isoform 1 [Mus musculus]                              | 1695.7706 | 68.25  | 0.896634046 |
| 63602815 | GFGFVTFDDHDPVK               | PREDICTED: similar to heterogeneous nuclear ribonucleoprotein A2/B1 isoform 2 [Mus musculus]        | 1695.7706 | 68.25  | 0.896634046 |
| 7304885  | GFGTDEQAIDCLGSR              | annexin A11 [Mus musculus]                                                                          | 1681.7942 | 85.93  | 0.416846902 |
| 6680027  | GFIGPGIDVPAPDMSTGER          | glutamate dehydrogenase 1 [Mus musculus]                                                            | 1915.924  | 24.77  | 0.320375803 |
| 6679687  | GFPTIYFSPANK                 | glucose regulated protein [Mus musculus]                                                            | 1341.6843 | 35.67  | 0.401453662 |
| 27229277 | GFQEVVTPNIFNSR               | threonyl-tRNA synthetase [Mus musculus]                                                             | 1607.812  | 27.78  | 0.343268649 |
| 31981111 | GFSAEQIAR                    | implantation-associated protein [Mus musculus]                                                      | 978.5016  | 31.45  | 0.440303427 |
| 31560691 | GFSEGLWEIENNPVK              | hepatoma-derived growth factor [Mus musculus]                                                       | 1819.8817 | 46.77  | 0           |
| 33186863 | GFSLEELR                     | ribosomal protein L13 [Mus musculus]                                                                | 950.499   | 41.2   | 0.512835613 |
| 6754508  | GFSVVADTPELQR                | LIM and SH3 protein 1 [Mus musculus]                                                                | 1418.7299 | 63.37  | 0.710699676 |
| 15617203 | GFTIPEAFR                    | chloride intracellular channel 1 [Mus musculus]                                                     | 1037.543  | 33.85  | 0.519927608 |
| 31982520 | GFYYLMQELPQR                 | acetyl-Coenzyme A dehydrogenase, long-chain [Mus musculus]                                          | 1673.806  | 27.14  | 0.607639123 |
| 6681209  | GGAPAEGEGTTPPEASR            | DNA methyltransferase 3A isoform 1 [Mus musculus]                                                   | 1712.7843 | 26.11  | 0.236312559 |
| 41322904 | GGELVYTDTEAR                 | plectin 1 isoform 1 [Mus musculus]                                                                  | 1310.6282 | 57.93  | 0           |
| 24418933 | GGENIYPAELEDFLK              | hypothetical protein LOC264895 [Mus musculus]                                                       | 1841.8966 | 94.63  | 0.332510528 |
| 6755252  | GGGGGGGPGGEQETQELASK         | purine rich element binding protein B [Mus musculus]                                                | 1829.8317 | 99.63  | 0.473775512 |
| 1346343  | GGGGGGYGSGGSSYSGGGSYSGGGGGGR | Keratin, type II cytoskeletal 1 (Cytokeratin 1) (K1) (CK 1) (67 kDa cytokeratin) (Hair alpha protei | 2383.9531 | 122.86 | 0           |
| 7949053  | GGGNFGPGPSNFR                | heterogeneous nuclear ribonucleoprotein A2/B1 isoform 1 [Mus musculus]                              | 1377.6312 | 97.32  | 0.417320537 |
| 6680572  | GGGSFVQNNQPVGLR              | kinesin family member 5B [Mus musculus]                                                             | 1529.7871 | 38.33  | 1.048213249 |
| 63476037 | GGPGQPFEGEQGTR               | PREDICTED: procollagen, type VI, alpha 3 [Mus musculus]                                             | 1473.6761 | 68.3   | 0.093796569 |
| 34328400 | GGPPFAFVEFEDPR               | splicing factor, arginine/serine-rich 1 (ASF/SF2) [Mus musculus]                                    | 1564.7441 | 37.79  | 0.318726051 |
| 6680606  | GGSFSGTLAVSDGLLSGNEK         | keratin complex 1, acidic, gene 19 [Mus musculus]                                                   | 1895.9319 | 116.58 | 3.331518074 |
| 22164798 | GGSVQVLEDQLTCQPEPLVVK        | selenium binding protein 1 [Mus musculus]                                                           | 2368.2163 | 74.48  | 0.371028817 |
| 24418933 | GGVIAGSPAPPELIR              | hypothetical protein LOC264895 [Mus musculus]                                                       | 1433.8132 | 40.78  | 0.393185072 |
| 29789343 | GHPSAGAEIEEGSDGSAEAEPR       | eukaryotic translation initiation factor 3, subunit 9 [Mus musculus]                                | 2167.9128 | 24.99  | 0.675318939 |
| 22165384 | GHYTEGAELVDSVLDVVR           | tubulin, beta, 2 [Mus musculus]                                                                     | 1958.9835 | 31.83  | 0.493562495 |
| 33859488 | GHYTEGAELVDSVLDVVR           | tubulin, beta 2 [Mus musculus]                                                                      | 1958.9835 | 31.83  | 0.493562495 |
| 12963615 | GHYTEGAELVDSVLDVVR           | tubulin, beta 3 [Mus musculus]                                                                      | 1958.9835 | 31.83  | 0.493562495 |
| 7106439  | GHYTEGAELVDSVLDVVR           | tubulin, beta 5 [Mus musculus]                                                                      | 1958.9835 | 31.83  | 0.493562495 |
| 27754056 | GHYTEGAELVDSVLDVVR           | tubulin, beta 6 [Mus musculus]                                                                      | 1958.9835 | 31.83  | 0.493562495 |
| 21746161 | GHYTEGAELVDSVLDVVR           | tubulin, beta [Mus musculus]                                                                        | 1958.9835 | 31.83  | 0.493562495 |
| 21313520 | GIADVPEWFR                   | acetoacetyl-CoA synthetase [Mus musculus]                                                           | 1189.6052 | 32.29  | 0.538833761 |
| 24418919 | GIAGLGDVAEVR                 | brain glycogen phosphorylase [Mus musculus]                                                         | 1156.6359 | 34.95  | 0           |
| 19526818 | GIFNGFSITLK                  | solute carrier family 25 (mitochondrial carrier, phosphate carrier), member 3 [Mus musculus]        | 1196.6652 | 65.31  | 0.390903622 |
| 19526818 | GIFNGFSITLK                  | solute carrier family 25 (mitochondrial carrier, phosphate carrier), member 3 [Mus musculus]        | 1197.6436 | 59.61  | 0           |
| 21450291 | GILAADESVMGMNR               | aldolase 2, B isoform [Mus musculus]                                                                | 1490.7284 | 25.6   | 0           |
| 63518159 | GILFVGSVSGGEEGAR             | PREDICTED: phosphogluconate dehydrogenase [Mus musculus]                                            | 1591.8101 | 100.49 | 0.50052745  |
| 30023842 | GILLYGPPGTGK                 | valosin containing protein [Mus musculus]                                                           | 1172.6632 | 43.45  | 0           |
| 31543942 | GILSGTSDLLTFDEAEVR           | vinculin [Mus musculus]                                                                             | 2036.064  | 24.99  | 0           |
| 6679457  | GINQGQVWIGGR                 | proteoglycan 2, bone marrow [Mus musculus]                                                          | 1284.6844 | 46.9   | 0           |
| 18079351 | GIQDVVYLSEQQGLLLK            | major vault protein [Mus musculus]                                                                  | 1903.048  | 60.31  | 1.039417564 |
| 51766008 | GIQEIGEMMGLNSTELER           | PREDICTED: myosin IA [Mus musculus]                                                                 | 2006.9626 | 61.22  | 0.457705216 |
| 27754065 | GISCMTTVSESPFK               | pyrophosphatase [Mus musculus]                                                                      | 1600.7295 | 22.71  | 0           |
| 11230802 | GISQEQMQEFR                  | actinin alpha 4 [Mus musculus]                                                                      | 1352.6295 | 46.56  | 0.744781517 |
| 6756041  | GIVDQSQQAYQEAFEISK           | tyrosine 3-monooxygenase/tryptophan 5-monooxygenase activation protein, zeta polypeptide [Mus muscu | 2040.9861 | 60.84  | 0.514850729 |
| 23956084 | GIVNEQFLLQR                  | acyl-Coenzyme A dehydrogenase, very long chain [Mus musculus]                                       | 1316.7323 | 38.2   | 0.304422806 |
| 20149756 | GIYAYGFEKPSAIQQR             | DEAD (Asp-Glu-Ala-Asp) box polypeptide 48 [Mus musculus]                                            | 1827.941  | 22.92  | 0.476532325 |
| 21450625 | GIYAYGFEKPSAIQQR             | eukaryotic translation initiation factor 4A1 [Mus musculus]                                         | 1827.941  | 22.92  | 0.476532325 |
| 6755809  | GLAGAVSELLR                  | talin 1 [Mus musculus]                                                                              | 1085.6321 | 35.72  | 0.279581357 |
| 13386034 | GLAPDLPEDLYHLIK              | ribosomal protein S13 [Mus musculus]                                                                | 1693.9039 | 27.16  | 0.80202375  |
| 6671561  | GLAVFISDIR                   | adaptor protein complex AP-2, alpha 1 subunit [Mus musculus]                                        | 1090.6238 | 52.78  | 0           |
| 40254646 | GLAVFISDIR                   | adaptor protein complex AP-2, alpha 2 subunit [Mus musculus]                                        | 1090.6238 | 52.78  | 0           |
| 6755372  | GLCAIAQAESLR                 | ribosomal protein S3 [Mus musculus]                                                                 | 1231.6498 | 28.54  | 0           |
| 36031080 | GLDGFQGPSGPR                 | procollagen, type IV, alpha 2 [Mus musculus]                                                        | 1187.5833 | 57.38  | 0.234191274 |
| 20149756 | GLDVPQVSLIINYDLPNNR          | DEAD (Asp-Glu-Ala-Asp) box polypeptide 48 [Mus musculus]                                            | 2140.1448 | 38.4   | 0.574862947 |

Deamidation (NQ)

|          |                         |                  |                                                                                                    |           |        |             |
|----------|-------------------------|------------------|----------------------------------------------------------------------------------------------------|-----------|--------|-------------|
| 6681069  | GLESTTLADKDEIYCK        |                  | cysteine and glycine-rich protein 1 [Mus musculus]                                                 | 1842.8702 | 81.84  | 0           |
| 10946870 | GLEVTAYSPLGSSDR         |                  | aldo-keto reductase family 1, member A4 (aldehyde reductase) [Mus musculus]                        | 1551.7827 | 62     | 0           |
| 6755863  | GLFDEYGSK               |                  | tumor rejection antigen gp96 [Mus musculus]                                                        | 1015.4725 | 44.12  | 0.454327238 |
| 6680690  | GLFIIDPNGVVK            |                  | peroxiredoxin 3 [Mus musculus]                                                                     | 1271.7327 | 39.81  | 1.393229908 |
| 12746448 | GLFLPEDENLR             |                  | aspartyl beta-hydroxylase [Mus musculus]                                                           | 1302.6641 | 55.26  | 0           |
| 7304889  | GLGTDEDAIIGILAYR        |                  | annexin A4 [Mus musculus]                                                                          | 1676.8853 | 76.61  | 0.311874783 |
| 6753060  | GLGTDEDSILNLLTSR        |                  | annexin A5 [Mus musculus]                                                                          | 1703.881  | 83.43  | 0.232893546 |
| 6996913  | GLGTDEDSLIEICSR         |                  | annexin A2 [Mus musculus]                                                                          | 1720.8494 | 110.62 | 0.385891264 |
| 6754570  | GLGTDEDTLIEILTTR        |                  | annexin A1 [Mus musculus]                                                                          | 1746.9108 | 106.13 | 0.376688895 |
| 31982159 | GLGTEVPGNFQGGPDPYR      |                  | hypothetical protein LOC235043 [Mus musculus]                                                      | 1803.8654 | 46.67  | 0.509165231 |
| 40018610 | GLIEIISNAAEYENIPIR      |                  | U5 snRNP-specific protein, 200 kDa [Mus musculus]                                                  | 2015.0819 | 59.56  | 0.374388437 |
| 7948997  | GLIPGSLQNEPTASVPPQSDVYR |                  | PDZ and LIM domain 3 [Mus musculus]                                                                | 2425.2334 | 76.53  | 0           |
| 6678329  | GLLIEPAANSYLLAER        |                  | transglutaminase 2, C polypeptide [Mus musculus]                                                   | 1729.9473 | 46.87  | 0.411648667 |
| 31981826 | GLLPEELTPLILETQK        |                  | electron transferring flavoprotein, alpha polypeptide [Mus musculus]                               | 1794.0265 | 53.61  | 0.305474149 |
| 21704020 | GLLTYTQSWEDALSR         |                  | NADH dehydrogenase (ubiquinone) Fe-S protein 1 [Mus musculus]                                      | 1611.8041 | 48.67  | 0.287824969 |
| 31981549 | GLPEGFAYPK              |                  | sulfide quinone reductase-like [Mus musculus]                                                      | 1078.5491 | 25.52  | 0           |
| 10946928 | GLPWSCSADEVQR           |                  | heterogeneous nuclear ribonucleoprotein H1 [Mus musculus]                                          | 1447.6809 | 29.02  | 0           |
| 27754118 | GLTSLYALILNNK           |                  | asporin [Mus musculus]                                                                             | 1533.8549 | 24.86  | 0           |
| 63746482 | GLVEPVDVVDNADGTQTVNVPYR |                  | PREDICTED: filamin, alpha [Mus musculus]                                                           | 2544.2512 | 162.57 | 0.089303838 |
| 13386272 | GLVYETSVLDPDEGIR        |                  | citrate synthase-like protein [Mus musculus]                                                       | 1762.8922 | 50.59  | 0.492254024 |
| 13385942 | GLVYETSVLDPDEGIR        |                  | citrate synthase [Mus musculus]                                                                    | 1762.8922 | 50.59  | 0.492254024 |
| 6680748  | GMSLNLEPDNVGVVFGNDK     |                  | ATP synthase, H+ transporting, mitochondrial F1 complex, alpha subunit, isoform 1 [Mus musculus]   | 2104.0422 | 99.82  | 0.440635699 |
| 6680748  | GMSLNLEPDNVGVVFGNDK     | Oxidation (M)    | ATP synthase, H+ transporting, mitochondrial F1 complex, alpha subunit, isoform 1 [Mus musculus]   | 2120.0342 | 86.78  | 1.059663274 |
| 31560611 | GMTVYGLPR               |                  | calponin 1 [Mus musculus]                                                                          | 993.5214  | 44.73  | 0.15241458  |
| 31560611 | GMTVYGLPR               | Oxidation (M)    | calponin 1 [Mus musculus]                                                                          | 1009.5106 | 23.35  | 0           |
| 30911099 | GNAGQTNYGAFANSTMER      |                  | fatty acid synthase [Mus musculus]                                                                 | 1817.7927 | 62.32  | 0.46104134  |
| 21728376 | GNFNIEFTR               |                  | myosin regulatory light chain-like [Mus musculus]                                                  | 1260.6057 | 23.02  | 0.282265715 |
| 7949051  | GNFTLPEVAECFDEITYVELQK  |                  | heterogenous nuclear ribonucleoprotein U [Mus musculus]                                            | 2545.2307 | 46.07  | 0.616511876 |
| 6754854  | GNLYWTDWNR              |                  | nidogen 1 [Mus musculus]                                                                           | 1324.6146 | 59.54  | 0.273812149 |
| 6679058  | GNLYWTDWNR              |                  | nidogen 2 [Mus musculus]                                                                           | 1324.6146 | 59.54  | 0.273812149 |
| 7305027  | GNPTVEVDLYTAK           |                  | enolase 2, gamma neuronal [Mus musculus]                                                           | 1406.7141 | 70.29  | 0.42269624  |
| 51770896 | GNPTVEVDLYTAK           |                  | PREDICTED: similar to Alpha enolase (2-phospho-D-glycerate hydro-lyase) (Non-neural enolase) (NNE) | 1406.7141 | 70.29  | 0.42269624  |
| 13385994 | GNSIIMLEALER            |                  | small nuclear ribonucleoprotein polypeptide G [Mus musculus]                                       | 1345.7169 | 25.7   | 1.954408543 |
| 21704206 | GNWGYLDQAAALR           |                  | carboxylesterase 2 [Mus musculus]                                                                  | 1434.7128 | 69.53  | 0           |
| 27370126 | GNWGYLDQVAALR           |                  | carboxylesterase 5 [Mus musculus]                                                                  | 1462.7469 | 74.84  | 0.422407402 |
| 19527178 | GNWGYLDQVAALR           |                  | carboxylesterase 6 [Mus musculus]                                                                  | 1462.7469 | 74.84  | 0.422407402 |
| 37202121 | GNYLVDVDGNR             |                  | 4-aminobutyrate aminotransferase [Mus musculus]                                                    | 1221.5859 | 44.23  | 1.259886468 |
| 31560611 | GPAYGLSAEVK             |                  | calponin 1 [Mus musculus]                                                                          | 1091.5709 | 94.91  | 0.064833071 |
| 30023842 | GPELLTMWFGESANVR        |                  | valosin containing protein [Mus musculus]                                                          | 1951.9247 | 40.07  | 0.487582683 |
| 6679573  | GPGLGSTQGQTIALPAQGLIEFR |                  | purine rich element binding protein A [Mus musculus]                                               | 2311.2434 | 92.57  | 0.353870368 |
| 6755204  | GPLYVDSEGNR             |                  | proteasome (prosome, macropain) subunit, beta type 5 [Mus musculus]                                | 1426.6652 | 58.9   | 0.848509086 |
| 7305445  | GPLQSVQVFGR             |                  | ribosomal protein S16 [Mus musculus]                                                               | 1187.6532 | 31.05  | 0.559893964 |
| 13626040 | GPSEAPQEAEEAGTSDGEK     |                  | A kinase (PRKA) anchor protein (gravin) 12 [Mus musculus]                                          | 2088.8884 | 54.47  | 0.323787297 |
| 6680980  | GPSGPGQIRGDKGEPGDK      | Deamidation (NQ) | procollagen, type 1, alpha 2 [Mus musculus]                                                        | 1752.826  | 23.49  | 0           |
| 30911099 | GPSIALDTACSSLLALQNAQAIR |                  | fatty acid synthase [Mus musculus]                                                                 | 2563.3105 | 33.11  | 0.766214404 |
| 33859600 | GPTEQLVSPPEVEYIVR       |                  | protein phosphatase 1B, magnesium dependent, beta isoform [Mus musculus]                           | 2042.0388 | 44.7   | 0.158681917 |
| 51766545 | GQDIFIQITPR             |                  | PREDICTED: phosphoribosyl pyrophosphate synthetase-associated protein 1 [Mus musculus]             | 1400.788  | 22.71  | 0           |
| 27754099 | GQELAFPLSPDWQVDYESYTWYR |                  | eukaryotic translation elongation factor 1 gamma [Mus musculus]                                    | 2687.2366 | 45.26  | 0.387143952 |
| 29293809 | GQELIYAGMPITEVFK        |                  | ATP citrate lyase [Mus musculus]                                                                   | 1795.9257 | 22.4   | 0           |
| 58037546 | GQETSTNPIASIFAWSR       |                  | isocitrate dehydrogenase 1 (NADP+), soluble [Mus musculus]                                         | 1864.9222 | 112.16 | 0.458632237 |
| 51491845 | GQFSTDELVAEVEKR         |                  | clathrin, heavy polypeptide (Hc) [Mus musculus]                                                    | 1707.8628 | 24.69  | 0           |
| 13386370 | GQGAAAQQGGYEIPAR        |                  | kinesin-like 8 [Mus musculus]                                                                      | 1644.812  | 39.27  | 0.430576181 |
| 6677871  | GQIYTWQGANATR           |                  | scinderin [Mus musculus]                                                                           | 1578.8018 | 57.06  | 0.6499798   |
| 23956084 | GQLTIDQVFPYPSVLEEQAQFLK |                  | acyl-Coenzyme A dehydrogenase, very long chain [Mus musculus]                                      | 2737.4031 | 37.82  | 0           |
| 6755698  | GQNDLMGTAEDFADQFLR      |                  | surfeit gene 4 [Mus musculus]                                                                      | 2027.9152 | 99.06  | 0.409797405 |
| 6755698  | GQNDLMGTAEDFADQFLR      | Oxidation (M)    | surfeit gene 4 [Mus musculus]                                                                      | 2043.9093 | 35.59  | 0.444398951 |
| 21489933 | GQPFVDGPR               |                  | mitogen activated protein kinase 3 [Mus musculus]                                                  | 972.4838  | 30.47  | 0.497444442 |
| 6678331  | GQPWEILVGNR             |                  | transglutaminase 3, E polypeptide [Mus musculus]                                                   | 1427.7527 | 37.05  | 0           |
| 21536248 | GQQYTDSDFAQVNLPLR       |                  | glutathione S-transferase, theta 3 [Mus musculus]                                                  | 1723.8438 | 36.82  | 0.374490946 |
| 6754632  | GQVFDVGNR               |                  | mitogen activated protein kinase 1 [Mus musculus]                                                  | 974.5047  | 24.16  | 0.328658017 |

|          |                         |                                                                                              |           |        |             |
|----------|-------------------------|----------------------------------------------------------------------------------------------|-----------|--------|-------------|
| 6754090  | GSAPPGVPEGQIR           | glutathione S-transferase omega 1 [Mus musculus]                                             | 1361.7197 | 50.27  | 0.383968372 |
| 27532959 | GSASSALELTEEELATAEAVR   | aldehyde dehydrogenase 1 family, member L1 [Mus musculus]                                    | 2134.0522 | 84.16  | 0.267056698 |
| 16716467 | GSDHSASLEPGELAEIVR      | N-acetylneuraminic acid synthase (sialic acid synthase) [Mus musculus]                       | 1866.9166 | 69.05  | 0.157146006 |
| 23346461 | GSGIQWDLR               | NADH dehydrogenase (ubiquinone) Fe-S protein 2 [Mus musculus]                                | 1031.5289 | 26.78  | 0.321311464 |
| 6678143  | GSIFAVFDSIQSAK          | autoantigen La [Mus musculus]                                                                | 1469.7599 | 55.36  | 0.73900571  |
| 6678573  | GSLNITTPGIQIWR          | villin 1 [Mus musculus]                                                                      | 1555.8611 | 68.16  | 0.548192652 |
| 6678449  | GSVNMPFMDFLTK           | thiosulfate sulfurtransferase, mitochondrial [Mus musculus]                                  | 1486.7076 | 40.06  | 0           |
| 7657429  | GSYTYFAPSNEAWENLSDIR    | osteoblast specific factor 2 (fasciclin I-like) [Mus musculus]                               | 2435.0898 | 113.85 | 0           |
| 22094075 | GTDIMYTGTLDCWR          | solute carrier family 25, member 5 [Mus musculus]                                            | 1631.7251 | 96.25  | 0.571722512 |
| 22094075 | GTDIMYTGTLDCWR          | solute carrier family 25, member 5 [Mus musculus]                                            | 1647.7166 | 22.41  | 0           |
| 6754570  | GTDVNVFTTILTSR          | annexin A1 [Mus musculus]                                                                    | 1523.8048 | 44.07  | 1.169436789 |
| 31982666 | GTEDFIVESLDASFR         | signal sequence receptor, alpha [Mus musculus]                                               | 1685.8088 | 54.9   | 0           |
| 6680850  | GTELDDGIQADSGPINDIDANPR | caspase 7 [Mus musculus]                                                                     | 2383.1038 | 70.58  | 0.354541344 |
| 37202121 | GTFCSFDPDEAIR           | 4-aminobutyrate aminotransferase [Mus musculus]                                              | 1558.6908 | 50.49  | 0.302669891 |
| 6679761  | GTGELTQLLNSMLTAIK       | fructose biphosphatase 2 [Mus musculus]                                                      | 1789.9739 | 49.93  | 0           |
| 6753428  | GTGGVDTAATGVSFIDISNLDR  | creatine kinase, mitochondrial 1, ubiquitous [Mus musculus]                                  | 2052.9827 | 135.39 | 0.239486674 |
| 10946574 | GTGGVDTAAVGGVDFVSNADR   | creatine kinase, brain [Mus musculus]                                                        | 1964.9304 | 103.03 | 0.115007934 |
| 13385340 | GTGLDEAMEWLIVETLK       | ADP-ribosylation factor-like 1 [Mus musculus]                                                | 1791.8856 | 46.61  | 0.951560187 |
| 7304887  | GTGTDEDALIEILTTR        | annexin A3 [Mus musculus]                                                                    | 1704.8695 | 96.29  | 0.190997359 |
| 13385274 | GTLYIVEQIPTVVEYSDQTNVLR | hypothetical protein LOC66857 [Mus musculus]                                                 | 2701.3613 | 22.16  | 0           |
| 31560449 | GTPEPGPLGATDER          | aspartyl aminopeptidase [Mus musculus]                                                       | 1396.6664 | 55.09  | 0.418932188 |
| 6679237  | GTPLDTEVPLER            | pyruvate carboxylase [Mus musculus]                                                          | 1326.6921 | 26.03  | 0           |
| 6677935  | GTPSSSPVSPQESPK         | sorbin and SH3 domain containing 1 [Mus musculus]                                            | 1484.7245 | 43.62  | 0.425162696 |
| 29789343 | GTQGVVTFNFEIFR          | eukaryotic translation initiation factor 3, subunit 9 [Mus musculus]                         | 1467.7622 | 30.79  | 1.451485188 |
| 31981826 | GTSFEAAATSGGSASSEK      | electron transferring flavoprotein, alpha polypeptide [Mus musculus]                         | 1644.7375 | 57.99  | 1.461447022 |
| 6678097  | GTTASQMAQALALDK         | serine (or cysteine) proteinase inhibitor, clade B, member 6a [Mus musculus]                 | 1505.7557 | 84.73  | 0.932623095 |
| 31981302 | GTVCAAANDFNPADAK        | annexin A6 [Mus musculus]                                                                    | 1608.693  | 24.27  | 0           |
| 40254595 | GTVVYGEPIASLGTGDSHYWSK  | dihydropyrimidinase-like 2 [Mus musculus]                                                    | 2425.167  | 62.8   | 0           |
| 22164798 | GTWEKPGDAAPMGYDFWYQPR   | selenium binding protein 1 [Mus musculus]                                                    | 2472.1147 | 60.12  | 0.192568274 |
| 20149742 | GTYFPTWEGLFWEK          | pre-mRNA processing factor 8 [Mus musculus]                                                  | 1760.8353 | 39.26  | 0           |
| 63540743 | GVAGVPAEFSIWTR          | PREDICTED: filamin C, gamma [Mus musculus]                                                   | 1489.7814 | 28.59  | 0.25097204  |
| 19526818 | GVAPLWMR                | solute carrier family 25 (mitochondrial carrier, phosphate carrier), member 3 [Mus musculus] | 929.5046  | 31.09  | 0.305005612 |
| 23956222 | GVDDLDFFIGDEAIEKPTYATK  | ARP3 actin-related protein 3 homolog [Mus musculus]                                          | 2444.2024 | 67.95  | 0           |
| 6754570  | GVDEATIIDLTK            | annexin A1 [Mus musculus]                                                                    | 1387.7614 | 55.48  | 0           |
| 6996913  | GVDEVTIVNLTNR           | annexin A2 [Mus musculus]                                                                    | 1542.8519 | 88.82  | 0.572600491 |
| 29789257 | GVDLQESNPASR            | RAB5C, member RAS oncogene family [Mus musculus]                                             | 1272.6223 | 56.97  | 0.405528958 |
| 13385374 | GVDLTEPAQPAR            | RAB5A, member RAS oncogene family [Mus musculus]                                             | 1253.6522 | 32.55  | 0           |
| 40018610 | GVESVFDIMEMEDEER        | U5 snRNP-specific protein, 200 kDa [Mus musculus]                                            | 1914.8334 | 34.17  | 0           |
| 21450277 | GVGIIEGNETVEDIAAR       | Na <sup>+</sup> /K <sup>+</sup> -ATPase alpha 1 subunit [Mus musculus]                       | 1829.9196 | 89.72  | 0.227673424 |
| 31981147 | GVLFASGQNLAR            | leucine aminopeptidase 3 [Mus musculus]                                                      | 1232.6761 | 28.9   | 0.428189099 |
| 7710042  | GVLLIEIDLQANQFK         | IQ motif containing GTPase activating protein 1 [Mus musculus]                               | 1716.916  | 44.69  | 0           |
| 33859482 | GVQYLNIEK               | eukaryotic translation elongation factor 2 [Mus musculus]                                    | 1063.5763 | 40.13  | 0.342357143 |
| 6753514  | GVTLPELYQDPAYQR         | carnitine palmitoyltransferase 2 [Mus musculus]                                              | 1749.8835 | 60.45  | 0           |
| 6755863  | GVVDSDDLPLNVS           | tumor rejection antigen gp96 [Mus musculus]                                                  | 1485.7561 | 86.74  | 0.600579892 |
| 6754254  | GVVDSDELPLNISR          | heat shock protein 1, alpha [Mus musculus]                                                   | 1513.7885 | 64.59  | 0.593479522 |
| 40556608 | GVVDSDELPLNISR          | heat shock protein 1, beta [Mus musculus]                                                    | 1513.7885 | 64.59  | 0.593479522 |
| 27532959 | GVVNILPGSGSLVGQR        | aldehyde dehydrogenase 1 family, member L1 [Mus musculus]                                    | 1552.8821 | 35.29  | 0.286297999 |
| 6671539  | GVVPLAGTNGETTTQGLDGLSER | aldolase 1, A isoform [Mus musculus]                                                         | 2272.1467 | 133.7  | 0.414039683 |
| 6671539  | GVVPLAGTNGETTTQGLDGLSER | aldolase 1, A isoform [Mus musculus]                                                         | 2273.1262 | 102.27 | 0.337045658 |
| 12963691 | GVVSDNCYPFSGR           | tubulointerstitial nephritis antigen-like [Mus musculus]                                     | 1400.6412 | 26.11  | 0.244608587 |
| 6753428  | GWEFMWNER               | creatine kinase, mitochondrial 1, ubiquitous [Mus musculus]                                  | 1254.5438 | 52.26  | 0           |
| 38259206 | GWEFMWNER               | creatine kinase, mitochondrial 2 [Mus musculus]                                              | 1254.5438 | 52.26  | 0           |
| 6753010  | GWGDQLIWTQTYEEALYR      | anterior gradient 2 [Mus musculus]                                                           | 2229.0659 | 87.94  | 0.301550046 |
| 12746446 | GWSESEQSEEFGGGIATMER    | epithelial protein lost in neoplasm [Mus musculus]                                           | 2186.9409 | 28.48  | 1.131408671 |
| 22267440 | GYADIVQLLLAK            | SH3 domain protein 3 [Mus musculus]                                                          | 1303.7605 | 80.01  | 1.524648179 |
| 22122825 | GYAFNHSAADFETVR         | actin-related protein 2 [Mus musculus]                                                       | 1613.7327 | 53.54  | 0.696391747 |
| 7305085  | GYDFESETDTETIAK         | glutamine fructose-6-phosphate transaminase 1 [Mus musculus]                                 | 1705.7437 | 99.02  | 0.280326457 |
| 55742711 | GYDFPAVLR               | EH-domain containing 2 [Mus musculus]                                                        | 1037.5422 | 42.13  | 0           |
| 7305085  | GYDVDFPR                | glutamine fructose-6-phosphate transaminase 1 [Mus musculus]                                 | 968.4494  | 38.29  | 0.296819159 |
| 21450625 | GYDVIAQAQSGTGK          | eukaryotic translation initiation factor 4A1 [Mus musculus]                                  | 1394.6879 | 69.19  | 0.546649214 |



|          |                            |                  |                                                                                             |           |        |             |
|----------|----------------------------|------------------|---------------------------------------------------------------------------------------------|-----------|--------|-------------|
| 59709449 | GYEEWLLNEIR                |                  | actinin alpha 2 [Mus musculus]                                                              | 1421.7102 | 63.85  | 0.332511855 |
| 11230802 | GYEEWLLNEIR                |                  | actinin alpha 4 [Mus musculus]                                                              | 1421.7102 | 63.85  | 0.332511855 |
| 63487095 | GYELLFQPEVVR               |                  | PREDICTED: catenin src [Mus musculus]                                                       | 1449.7744 | 38.98  | 0.425324893 |
| 6755863  | GYEVYILTEPVDDEYCIQALPEFDGK |                  | tumor rejection antigen gp96 [Mus musculus]                                                 | 2891.385  | 68.4   | 0           |
| 37537522 | GYFDEDMNSILADPGDDTK        |                  | epioplakin 1 [Mus musculus]                                                                 | 2102.9204 | 40.93  | 0           |
| 41322904 | GYFDEEMNR                  |                  | plectin 1 isoform 1 [Mus musculus]                                                          | 1160.4698 | 25.18  | 0           |
| 7949051  | GYFEYIEENK                 |                  | heterogenous nuclear ribonucleoprotein U [Mus musculus]                                     | 1291.5863 | 55.18  | 0.428892333 |
| 6753036  | GYFIQPTVFGDVK              |                  | aldehyde dehydrogenase 2, mitochondrial [Mus musculus]                                      | 1470.7612 | 61.94  | 0           |
| 6681069  | GYGYGQGAGTLSTDK            |                  | cysteine and glycine-rich protein 1 [Mus musculus]                                          | 1474.6802 | 88.06  | 0.247669719 |
| 6681069  | GYGYGQGAGTLSTDKGESLGK      |                  | cysteine and glycine-rich protein 1 [Mus musculus]                                          | 2159.0642 | 143.16 | 0.15801096  |
| 31981679 | GYISPYFINTSK               |                  | heat shock protein 1 (chaperonin) [Mus musculus]                                            | 1389.6869 | 27.97  | 0           |
| 27754065 | GYIWNYGAIQQTWEDPGHSDK      |                  | pyrophosphatase [Mus musculus]                                                              | 2434.1194 | 32.79  | 0           |
| 16716467 | GYPPEDIFNLAGK              |                  | N-acetylneuraminic acid synthase (sialic acid synthase) [Mus musculus]                      | 1420.7089 | 41.48  | 0.337861445 |
| 45598381 | GYPTLLLFRR                 |                  | thioredoxin domain containing 5 [Mus musculus]                                              | 1079.6288 | 27.51  | 0.327285871 |
| 45598381 | GYPTLLWFR                  |                  | thioredoxin domain containing 5 [Mus musculus]                                              | 1152.6222 | 31.42  | 0.333459731 |
| 6671509  | GYSFTTTAER                 |                  | actin, beta, cytoplasmic [Mus musculus]                                                     | 1132.5491 | 67.31  | 0.916380457 |
| 63652452 | GYSFTTTAER                 |                  | PREDICTED: similar to cytoplasmic beta-actin [Mus musculus]                                 | 1132.5491 | 67.31  | 0.916380457 |
| 30911099 | GYTVLGVGEGR                |                  | fatty acid synthase [Mus musculus]                                                          | 1050.5568 | 22.69  | 1.252635624 |
| 46849705 | GYVLPTAR                   |                  | lectin, galactose binding, soluble 4 [Mus musculus]                                         | 876.4974  | 32.73  | 0.465158661 |
| 31981549 | GYWGGPAFLR                 |                  | sulfide quinone reductase-like [Mus musculus]                                               | 1123.5721 | 31.42  | 0.640641004 |
| 41322904 | GYYSPPYSVSGSGSTAGSR        |                  | plectin 1 isoform 1 [Mus musculus]                                                          | 1782.7958 | 42.74  | 0           |
| 9790219  | HEYQANGPEDLNR              | Deamidation (NQ) | destrin [Mus musculus]                                                                      | 1543.6824 | 69.18  | 0           |
| 6753010  | HLSPDGQYVPR                |                  | anterior gradient 2 [Mus musculus]                                                          | 1268.6393 | 39.19  | 0.290073929 |
| 6680047  | HLTYLDGGDIINALCFSPNR       |                  | guanine nucleotide binding protein (G protein), beta polypeptide 2 like 1 [Mus musculus]    | 2219.0811 | 26.65  | 0.6605258   |
| 7305295  | HTQAVEELTEQLEQFK           |                  | myosin, heavy polypeptide 11, smooth muscle [Mus musculus]                                  | 1929.957  | 72.35  | 0           |
| 63487095 | HYEDGYPGGSDNYGSLSR         |                  | PREDICTED: catenin src [Mus musculus]                                                       | 1973.8262 | 115.46 | 0.409723532 |
| 21450129 | IAAFADAADVDPIDFLPAYAVPK    |                  | acetyl-Coenzyme A acetyltransferase 1 precursor [Mus musculus]                              | 2443.2986 | 68.12  | 0           |
| 6754036  | IAATILTSPDLR               |                  | glutamate oxaloacetate transaminase 2, mitochondrial [Mus musculus]                         | 1270.735  | 49.48  | 0.068544704 |
| 21450291 | IADQCPSSLAIQENANALAR       |                  | aldolase 2, B isoform [Mus musculus]                                                        | 2085.0479 | 104.92 | 0.358665267 |
| 18250284 | IAEFAFEYAR                 |                  | isocitrate dehydrogenase 3 (NAD+) alpha [Mus musculus]                                      | 1216.6055 | 57.74  | 0.224922258 |
| 63476037 | IAEGVQLLIVLTAEPSGDDVR      |                  | PREDICTED: procollagen, type VI, alpha 3 [Mus musculus]                                     | 2292.2449 | 92.56  | 0.083473692 |
| 29788770 | IAELQQR                    | Deamidation (NQ) | nuclear mitotic apparatus protein 1 [Mus musculus]                                          | 858.4652  | 24.05  | 0           |
| 6753294  | IAEQVASFQEEK               |                  | catenin alpha 1 [Mus musculus]                                                              | 1378.666  | 47.55  | 0           |
| 6671561  | IAGDYVSEEVWYR              |                  | adaptor protein complex AP-2, alpha 1 subunit [Mus musculus]                                | 1586.7513 | 26.59  | 0           |
| 40254646 | IAGDYVSEEVWYR              |                  | adaptor protein complex AP-2, alpha 2 subunit [Mus musculus]                                | 1586.7513 | 26.59  | 0           |
| 6679515  | IAIPGLAGAGNSVLLVSNLNPFR    |                  | polypyrimidine tract binding protein 1 [Mus musculus]                                       | 2275.282  | 55.44  | 0.506502719 |
| 13399310 | IAIYELLFK                  |                  | ribosomal protein S10 [Mus musculus]                                                        | 1109.6595 | 42.2   | 0.370091382 |
| 31981515 | IALTDNSLIAR                |                  | ribosomal protein L7 [Mus musculus]                                                         | 1186.6803 | 35.72  | 1.422390619 |
| 31982522 | IAMQTLDMGR                 |                  | acyl-Coenzyme A dehydrogenase, short chain [Mus musculus]                                   | 1135.5614 | 64.46  | 0           |
| 55742877 | IANLNLGK                   | Deamidation (NQ) | hypothetical protein LOC105000 [Mus musculus]                                               | 843.4777  | 28.14  | 0           |
| 63746482 | IANLQTDLSGLR               |                  | PREDICTED: filamin, alpha [Mus musculus]                                                    | 1415.7531 | 87.72  | 0           |
| 33942112 | IAPAEGPDVSR                |                  | IGF-II mRNA-binding protein 2 [Mus musculus]                                                | 1240.6343 | 23.85  | 0           |
| 27369581 | IAPLAEGALPYNLAELQR         |                  | solute carrier family 25 (mitochondrial carrier, Aralar), member 12 [Mus musculus]          | 1939.0664 | 30.18  | 0           |
| 22122797 | IAQFLSGIPETVPLSTVNR        |                  | 3-ketoacyl-CoA thiolase B [Mus musculus]                                                    | 2042.1251 | 33.25  | 0.249703231 |
| 7305295  | IAQLEEELEEEQGNMEAMSDR      |                  | myosin, heavy polypeptide 11, smooth muscle [Mus musculus]                                  | 2451.0747 | 108.12 | 0.084039532 |
| 7305295  | IAQLEEELEEEQGNMEAMSDR      | 2 Oxidation (M)  | myosin, heavy polypeptide 11, smooth muscle [Mus musculus]                                  | 2483.0701 | 40.65  | 0           |
| 7305295  | IAQLEEQVEQEAR              |                  | myosin, heavy polypeptide 11, smooth muscle [Mus musculus]                                  | 1542.7794 | 81.36  | 0.078606581 |
| 41054806 | IAQSDYIPTQQDVLR            |                  | guanine nucleotide binding protein, alpha inhibiting 2 [Mus musculus]                       | 1746.9034 | 68.91  | 0.641840264 |
| 13385010 | IASGLGLAWIIGR              |                  | microsomal glutathione S-transferase 3 [Mus musculus]                                       | 1326.7933 | 49.56  | 0.392833576 |
| 36031080 | IAVQPGTLGPQGR              |                  | procollagen, type IV, alpha 2 [Mus musculus]                                                | 1293.7325 | 49.87  | 0.272883251 |
| 21450241 | IAWDDEETR                  |                  | propionyl-Coenzyme A carboxylase, alpha polypeptide [Mus musculus]                          | 1134.5179 | 27.48  | 0           |
| 6678331  | IAYSQYER                   |                  | transglutaminase 3, E polypeptide [Mus musculus]                                            | 1029.5015 | 54.76  | 0.069900121 |
| 51772556 | IDATQVEVNPFGTEPGQVVCFDAK   |                  | PREDICTED: similar to Succinate-Coenzyme A ligase, GDP-forming, beta subunit [Mus musculus] | 2693.2925 | 58.25  | 0.475724652 |
| 13384620 | IDEPLEGSER                 |                  | heterogeneous nuclear ribonucleoprotein K [Mus musculus]                                    | 1259.5769 | 54.64  | 0.458955722 |
| 23346461 | IDVEEMLTNNR                |                  | NADH dehydrogenase (ubiquinone) Fe-S protein 2 [Mus musculus]                               | 1462.6917 | 66.6   | 0.782509328 |
| 6680854  | IDFEDVIAEPEGTHSFDGIWK      |                  | caveolin, caveolae protein 1 [Mus musculus]                                                 | 2405.1377 | 64.15  | 0           |
| 33469063 | IDFEKEPLGVNAQGR            |                  | aconitase 1 [Mus musculus]                                                                  | 1672.8689 | 56.42  | 2.950062211 |
| 38090003 | IDIDNSGYVDYELQDLFK         |                  | PREDICTED: expressed sequence AI427122 [Mus musculus]                                       | 2234.0669 | 69.72  | 0.777895762 |
| 37202121 | IDIPSFWDWPIAFPFR           |                  | 4-aminobutyrate aminotransferase [Mus musculus]                                             | 1770.9336 | 28.39  | 0           |
| 22507339 | IDKMEEMMHK                 | Oxidation (M)    | forkhead box N4 [Mus musculus]                                                              | 1305.5981 | 23.26  | 0           |

|          |                                 |                  |                                                                                                     |           |        |             |
|----------|---------------------------------|------------------|-----------------------------------------------------------------------------------------------------|-----------|--------|-------------|
| 31982030 | IDKTDYMGVSYGPR                  |                  | Rho GDP dissociation inhibitor (GDI) alpha [Mus musculus]                                           | 1601.7635 | 37.23  | 0           |
| 31982030 | IDKTDYMGVSYGPR                  | Oxidation (M)    | Rho GDP dissociation inhibitor (GDI) alpha [Mus musculus]                                           | 1617.7426 | 24.69  | 0           |
| 31980969 | IDMNLDTLLGELQR                  |                  | SEC23B [Mus musculus]                                                                               | 1630.8457 | 77.26  | 0           |
| 31543902 | IDQYQGADAVGLEEK                 |                  | thioredoxin-like 1 [Mus musculus]                                                                   | 1635.7871 | 86.44  | 0.831177246 |
| 50355692 | IDSLSAQLSQLQK                   |                  | lamin A isoform A [Mus musculus]                                                                    | 1430.7794 | 73.62  | 0           |
| 9790073  | IDSVTGEIFSAAPLDR                |                  | cadherin 17 [Mus musculus]                                                                          | 1690.8698 | 125.91 | 0.493611122 |
| 7949053  | IDTIEIITDR                      |                  | heterogeneous nuclear ribonucleoprotein A2/B1 isoform 1 [Mus musculus]                              | 1188.6526 | 68.67  | 0.76747986  |
| 63602815 | IDTIEIITDR                      |                  | PREDICTED: similar to heterogeneous nuclear ribonucleoprotein A2/B1 isoform 2 [Mus musculus]        | 1188.6526 | 68.67  | 0.76747986  |
| 63562723 | IEDFLER                         |                  | PREDICTED: similar to 40S ribosomal protein S9 [Mus musculus]                                       | 921.465   | 30.07  | 0.396383067 |
| 63476037 | IEDNVQQFLVLLVAGR                |                  | PREDICTED: procollagen, type VI, alpha 3 [Mus musculus]                                             | 1814.0184 | 91.8   | 0.602395809 |
| 31981100 | IEDVTPIPSDSTR                   |                  | ribosomal protein S14 [Mus musculus]                                                                | 1429.7203 | 68.29  | 0.56473153  |
| 9845263  | IEEFQSTPGDIVITTPK               |                  | dopa/tyrosine sulfotransferase [Mus musculus]                                                       | 2038.0394 | 52.03  | 0.314515119 |
| 63476037 | IEEGVPQFLVLISSGK                |                  | PREDICTED: procollagen, type VI, alpha 3 [Mus musculus]                                             | 1715.9567 | 52.56  | 0.147489896 |
| 6680606  | IEELNTQVAHVSEIQIISK             |                  | keratin complex 1, acidic, gene 19 [Mus musculus]                                                   | 2166.1411 | 97.38  | 0.336481981 |
| 30794450 | IEEVPELPLVVDEK                  |                  | ribosomal protein L4 [Mus musculus]                                                                 | 1608.8712 | 72.84  | 0.628588119 |
| 19527334 | IEFDDFECELLR                    |                  | NADH dehydrogenase (ubiquinone) Fe-S protein 5 [Mus musculus]                                       | 1528.7101 | 54.8   | 0           |
| 37620153 | IEGYDPDEVVWFK                   |                  | myosin, light polypeptide kinase telokin isoform [Mus musculus]                                     | 1578.7828 | 53.41  | 0           |
| 31981722 | IEIESFFEGEDFSETLTR              |                  | heat shock 70kD protein 5 (glucose-regulated protein) [Mus musculus]                                | 2149.0012 | 59.43  | 0.361636675 |
| 31982720 | IEIPEYFNFAK                     |                  | SA rat hypertension-associated homolog [Mus musculus]                                               | 1370.698  | 37.62  | 0           |
| 482387   | IEISELNR                        |                  | keratin, 67K type II epidermal - human                                                              | 973.5314  | 35.55  | 0           |
| 1346343  | IEISELNR                        |                  | Keratin, type II cytoskeletal 1 (Cytokeratin 1) (K1) (CK 1) (67 kDa cytokeratin) (Hair alpha protei | 973.5314  | 35.55  | 0           |
| 13569841 | IEQIEAGTPGR                     |                  | thioredoxin reductase 1 [Mus musculus]                                                              | 1170.6143 | 33.12  | 0.580948315 |
| 33563270 | IEQLSPFPFDLLK                   |                  | oxoglutarate dehydrogenase (lipoamide) [Mus musculus]                                               | 1659.932  | 28.45  | 0.553251455 |
| 33563250 | IESLNIEIAFLK                    |                  | desmin [Mus musculus]                                                                               | 1405.7512 | 73.33  | 0.058864442 |
| 31559916 | IEITIEVMEDR                     |                  | heterogeneous nuclear ribonucleoprotein A3 isoform b [Mus musculus]                                 | 1234.598  | 55.63  | 0           |
| 21703972 | IETQDIQALR                      |                  | malic enzyme 2, NAD(+)-dependent, mitochondrial [Mus musculus]                                      | 1186.6437 | 41.04  | 0           |
| 6754220  | IEVIEIMTDR                      |                  | heterogeneous nuclear ribonucleoprotein A1 [Mus musculus]                                           | 1218.636  | 31.67  | 1.295287771 |
| 63663965 | IEVIEIMTDR                      |                  | PREDICTED: similar to Heterogeneous nuclear ribonucleoprotein A1 (Helix-destabilizing protein) (Sin | 1218.636  | 31.67  | 1.295287771 |
| 23956396 | IEVVFNLVFNNAVYDIVK              |                  | SPFH domain family, member 2 [Mus musculus]                                                         | 1932.0757 | 33.89  | 0.598942925 |
| 31981722 | IEWLESHQADIEDFK                 |                  | heat shock 70kD protein 5 (glucose-regulated protein) [Mus musculus]                                | 1974.9059 | 72.19  | 0.555677698 |
| 30520301 | IFAWATLR                        |                  | putative lysophosphatidic acid acyltransferase [Mus musculus]                                       | 977.5609  | 25.7   | 0           |
| 14861854 | IFEAQIAGLR                      |                  | keratin complex 2, basic, gene 7 [Mus musculus]                                                     | 1117.6337 | 41.38  | 0.46831308  |
| 31982186 | IFGVTTLDIVR                     |                  | malate dehydrogenase 2, NAD (mitochondrial) [Mus musculus]                                          | 1233.7249 | 65.74  | 0.367272351 |
| 27804325 | IFSVTNGGQER                     |                  | monoamine oxidase A [Mus musculus]                                                                  | 1207.6061 | 59.91  | 0           |
| 27804325 | IFSVTNGGQER                     | Deamidation (NQ) | monoamine oxidase A [Mus musculus]                                                                  | 1208.5913 | 51.81  | 0           |
| 19526814 | IFTNLYGR                        |                  | NADH dehydrogenase (ubiquinone) flavoprotein 1 [Mus musculus]                                       | 983.5263  | 30.15  | 0.333952262 |
| 31559916 | IFVGGIKEDTTEYNLR                |                  | heterogeneous nuclear ribonucleoprotein A3 isoform b [Mus musculus]                                 | 1882.955  | 95.48  | 0           |
| 6754222  | IFVGLLNPEATEEK                  |                  | heterogeneous nuclear ribonucleoprotein A/B [Mus musculus]                                          | 1503.7583 | 61.17  | 0.358216775 |
| 6671602  | IFVGLSPDTPPEEK                  |                  | heterogeneous nuclear ribonucleoprotein D [Mus musculus]                                            | 1488.75   | 72.8   | 0.528629014 |
| 22164798 | IFVVDWQR                        |                  | selenium binding protein 1 [Mus musculus]                                                           | 1149.5883 | 40.15  | 0.18131427  |
| 9790219  | IFYDMK                          |                  | destrin [Mus musculus]                                                                              | 816.3946  | 31.39  | 0.19235342  |
| 31560689 | IGAFSYGSGLAASFFSFR              |                  | 3-hydroxy-3-methylglutaryl-Coenzyme A synthase 2 [Mus musculus]                                     | 1884.9349 | 23.28  | 0.37140039  |
| 31982522 | IGCFALSEPGNGSDAGAASTAR          |                  | acyl-Coenzyme A dehydrogenase, short chain [Mus musculus]                                           | 2152.9963 | 133.16 | 0.347860875 |
| 31560438 | IGDFIDVSEGPIPR                  |                  | mitochondrial ribosomal protein L39 [Mus musculus]                                                  | 1627.876  | 35.25  | 0           |
| 63476037 | IGDLQSQIVSLLK                   |                  | PREDICTED: procollagen, type VI, alpha 3 [Mus musculus]                                             | 1413.8289 | 71.49  | 0.274346783 |
| 31559995 | IGDQEFDSLPALEFYK                |                  | v-cr sarcoma virus CT10 oncogene homolog [Mus musculus]                                             | 1984.9905 | 61.64  | 0           |
| 24418919 | IGEGFLDLSQLK                    |                  | brain glycogen phosphorylase [Mus musculus]                                                         | 1420.7668 | 70.17  | 0           |
| 6754750  | IGFPWSEIR                       |                  | moesin [Mus musculus]                                                                               | 1104.5895 | 40.51  | 0.395154876 |
| 6677699  | IGFPWSEIR                       |                  | radixin [Mus musculus]                                                                              | 1104.5895 | 40.51  | 0.395154876 |
| 6678571  | IGFPWSEIR                       |                  | villin 2 [Mus musculus]                                                                             | 1104.5895 | 40.51  | 0.395154876 |
| 51873060 | IGGIGTVPVGR                     |                  | eukaryotic translation elongation factor 1 alpha 1 [Mus musculus]                                   | 1025.6173 | 64.59  | 0.556464374 |
| 63660294 | IGNLQTDLSGLR                    |                  | PREDICTED: similar to Filamin B (FLN-B) (Beta-filamin) (Actin-binding like protein) (ABP-280-like p | 1401.735  | 44.81  | 0           |
| 51492007 | IGQQPQQPGAPPQQDYTK              |                  | KH-type splicing regulatory protein [Mus musculus]                                                  | 1980.978  | 38.87  | 0.524162261 |
| 63476037 | IGVVQFSNDVPEFYK                 |                  | PREDICTED: procollagen, type VI, alpha 3 [Mus musculus]                                             | 2002.0332 | 75.84  | 0           |
| 51873060 | IGYNPDTVAFVPISWGNDNMLEPSANMPWFK |                  | eukaryotic translation elongation factor 1 alpha 1 [Mus musculus]                                   | 3567.7246 | 51.29  | 0.527853051 |
| 6754976  | IGYPAPNFK                       |                  | peroxiredoxin 1 [Mus musculus]                                                                      | 1006.533  | 39.44  | 0           |
| 6680027  | IIAEGANGPTTPEADK                |                  | glutamate dehydrogenase 1 [Mus musculus]                                                            | 1583.7889 | 95.52  | 0.352795047 |
| 6680027  | IIAEGANGPTTPEADKIFLER           |                  | glutamate dehydrogenase 1 [Mus musculus]                                                            | 2242.1699 | 36.6   | 0.579862723 |
| 6671507  | IIAPPER                         |                  | actin, alpha 2, smooth muscle, aorta [Mus musculus]                                                 | 795.4727  | 23.99  | 0.187926997 |
| 6671509  | IIAPPER                         |                  | actin, beta, cytoplasmic [Mus musculus]                                                             | 795.4727  | 23.99  | 0.187926997 |

|          |                         |                    |                                                                                                  |           |        |             |
|----------|-------------------------|--------------------|--------------------------------------------------------------------------------------------------|-----------|--------|-------------|
| 30425250 | IIAPPER                 |                    | hypothetical protein LOC238880 [Mus musculus]                                                    | 795.4727  | 23.99  | 0.187926997 |
| 63652452 | IIAPPER                 |                    | PREDICTED: similar to cytoplasmic beta-actin [Mus musculus]                                      | 795.4727  | 23.99  | 0.187926997 |
| 37620153 | IIDDFELTER              |                    | myosin, light polypeptide kinase telokin isoform [Mus musculus]                                  | 1379.6698 | 68.83  | 0           |
| 30425168 | IIDFGLAR                |                    | myosin light chain kinase [Mus musculus]                                                         | 904.5275  | 23.86  | 0.11527906  |
| 6677813  | IIDVVYNASNNELVR         |                    | ribosomal protein S8 [Mus musculus]                                                              | 1718.9094 | 102.22 | 0.515344348 |
| 34734056 | IIEDNEYTAR              |                    | hemopoietic cell kinase isoform p59Hck [Mus musculus]                                            | 1223.5917 | 30.51  | 0           |
| 63476037 | IEELDVKPDGTR            |                    | PREDICTED: procollagen, type VI, alpha 3 [Mus musculus]                                          | 1484.798  | 61.22  | 0.271011688 |
| 31560680 | IIFDDFR                 |                    | integral membrane protein 1 [Mus musculus]                                                       | 925.4765  | 32.1   | 0.386499978 |
| 6679567  | IIGAVDQIQLTQAQLEER      |                    | polymerase I and transcript release factor [Mus musculus]                                        | 2025.1014 | 106.14 | 0.149203784 |
| 20137006 | IIGLDQVAGMSETALPGAFK    |                    | myosin, heavy polypeptide 9, non-muscle [Mus musculus]                                           | 2018.0651 | 89.26  | 0.480197258 |
| 20137006 | IIGLDQVAGMSETALPGAFK    | Oxidation (M)      | myosin, heavy polypeptide 9, non-muscle [Mus musculus]                                           | 2034.0417 | 68.75  | 0.522035114 |
| 7710042  | IIGNLLYYR               |                    | IQ motif containing GTPase activating protein 1 [Mus musculus]                                   | 1124.6506 | 31.6   | 0           |
| 41054806 | IIHEDGYSEEECR           |                    | guanine nucleotide binding protein, alpha inhibiting 2 [Mus musculus]                            | 1579.6825 | 38.04  | 0.325307808 |
| 7709980  | IILLAEGR                |                    | S-adenosylhomocysteine hydrolase [Mus musculus]                                                  | 884.5583  | 31.34  | 0.336701707 |
| 6679891  | IILTAQPPR               |                    | alpha glucosidase 2 alpha neutral subunit [Mus musculus]                                         | 1058.6368 | 35.97  | 0.513954006 |
| 51492007 | IINDLLQSLR              |                    | KH-type splicing regulatory protein [Mus musculus]                                               | 1184.7023 | 43.98  | 0.467137943 |
| 29789343 | IINDYYPEEDGK            |                    | eukaryotic translation initiation factor 3, subunit 9 [Mus musculus]                             | 1455.6632 | 35.51  | 4.740345036 |
| 31981722 | IINEPTAAAIAYGLDK        |                    | heat shock 70kD protein 5 (glucose-regulated protein) [Mus musculus]                             | 1659.9037 | 79.37  | 0.413659127 |
| 7305163  | IINEPTAAAIAYGLDK        |                    | heat shock protein 1-like [Mus musculus]                                                         | 1659.9037 | 79.37  | 0.413659127 |
| 31981690 | IINEPTAAAIAYGLDK        |                    | heat shock protein 8 [Mus musculus]                                                              | 1659.9037 | 79.37  | 0.413659127 |
| 63664182 | IINEPTAAAIAYGLDK        |                    | PREDICTED: similar to heat shock protein 8 [Mus musculus]                                        | 1659.9037 | 79.37  | 0.413659127 |
| 50080209 | IINEPTAAAIAYGLDR        |                    | heat shock protein 1A [Mus musculus]                                                             | 1687.9075 | 69.38  | 2.170381236 |
| 6679439  | IIPGFMCGGGDFTR          |                    | peptidylprolyl isomerase A [Mus musculus]                                                        | 1541.7255 | 81.34  | 0.558461081 |
| 41322904 | IISLETYNLFR             |                    | plectin 1 isoform 1 [Mus musculus]                                                               | 1368.7562 | 56.8   | 0.418394283 |
| 136429   | IITHPNFNGNTLDNDIMLIK    |                    | Trypsin precursor                                                                                | 2283.1848 | 149.12 | 0           |
| 136429   | IITHPNFNGNTLDNDIMLIK    | Deamidation (NQ)   | Trypsin precursor                                                                                | 2284.1658 | 36.71  | 0           |
| 136429   | IITHPNFNGNTLDNDIMLIK    | Oxidation (M)      | Trypsin precursor                                                                                | 2299.175  | 92.32  | 0.035607057 |
| 13384620 | IITITGTQDQIQNAQYLLQNSVK |                    | heterogeneous nuclear ribonucleoprotein K [Mus musculus]                                         | 2589.3875 | 85.15  | 0           |
| 13384620 | IITITGTQDQIQNAQYLLQNSVK | 2 Deamidation (NQ) | heterogeneous nuclear ribonucleoprotein K [Mus musculus]                                         | 2591.3313 | 26.4   | 0           |
| 13507656 | ILAAATQFEPTAAR          |                    | type 1 tumor necrosis factor receptor shedding aminopeptidase regulator [Mus musculus]           | 1388.7545 | 58.56  | 0.876661952 |
| 6678359  | ILATPPQEDAPSVDIANIR     |                    | transketolase [Mus musculus]                                                                     | 2020.0657 | 88.19  | 0.470971164 |
| 42415475 | ILEFFGLK                |                    | prolyl 4-hydroxylase, beta polypeptide [Mus musculus]                                            | 966.5648  | 48.49  | 0.458778634 |
| 19526822 | ILEFLGR                 |                    | sulfotransferase family 1A, phenol-preferring, member 1 [Mus musculus]                           | 847.5081  | 34.42  | 0.225895866 |
| 13937395 | ILEQEEEEEQAGK           |                    | arsenate resistance protein 2 [Mus musculus]                                                     | 1531.6892 | 37.25  | 1.728345305 |
| 45387933 | ILETTTFFQR              |                    | UDP-glucose ceramide glucosyltransferase-like 1 [Mus musculus]                                   | 1255.6672 | 25.87  | 0.394362877 |
| 30794394 | ILEVVNQVQDEER           |                    | hypothetical protein LOC71946 [Mus musculus]                                                     | 1570.8063 | 29.19  | 0           |
| 42415475 | ILFIFIDSDHTDNQR         |                    | prolyl 4-hydroxylase, beta polypeptide [Mus musculus]                                            | 1833.9083 | 45.95  | 0.952362651 |
| 29336026 | ILFQEFR                 |                    | nonmuscle myosin heavy chain [Mus musculus]                                                      | 952.5278  | 30.74  | 0.473433373 |
| 6680748  | ILGADTSVDLEETGR         |                    | ATP synthase, H+ transporting, mitochondrial F1 complex, alpha subunit, isoform 1 [Mus musculus] | 1575.7852 | 107.77 | 0.316054094 |
| 24762230 | ILGFFF                  |                    | ribosomal protein S15a [Mus musculus]                                                            | 743.4057  | 24.97  | 0.891065916 |
| 31982755 | ILLAELEQLK              |                    | vimentin [Mus musculus]                                                                          | 1169.7139 | 67.59  | 0.349270096 |
| 6680067  | ILLANFLAQTEALMK         |                    | glucose phosphate isomerase 1 [Mus musculus]                                                     | 1675.9435 | 57.75  | 1.153365091 |
| 6680067  | ILLANFLAQTEALMK         | Oxidation (M)      | glucose phosphate isomerase 1 [Mus musculus]                                                     | 1691.9249 | 50.57  | 0.345665589 |
| 31559883 | ILLIFEGTNEILR           |                    | very-long-chain acyl-CoA dehydrogenase VLCAD homolog [Mus musculus]                              | 1530.8878 | 24.97  | 0.470533705 |
| 46195430 | ILMWTELIR               |                    | NADH dehydrogenase (ubiquinone) Fe-S protein 8 [Mus musculus]                                    | 1174.6703 | 41.42  | 0           |
| 6755076  | ILQAVEFPFLVR            |                    | protein kinase, cAMP dependent, catalytic, beta [Mus musculus]                                   | 1431.8417 | 29.43  | 0.237640398 |
| 10946870 | ILQNIQVDFDFTSPEEMK      |                    | aldo-keto reductase family 1, member A4 (aldehyde reductase) [Mus musculus]                      | 2186.0684 | 46.03  | 0           |
| 31981679 | ILQSSSEVGYDAMLGDFVNMVEK |                    | heat shock protein 1 (chaperonin) [Mus musculus]                                                 | 2532.2007 | 74.76  | 0.434327107 |
| 31981679 | ILQSSSEVGYDAMLGDFVNMVEK | Oxidation (M)      | heat shock protein 1 (chaperonin) [Mus musculus]                                                 | 2548.1953 | 46.09  | 0           |
| 16716471 | ILSDTTLWLR              |                    | hypothetical protein LOC94184 [Mus musculus]                                                     | 1217.6904 | 62.7   | 0.242957574 |
| 13384620 | ILSISADIETIGEILK        |                    | heterogeneous nuclear ribonucleoprotein K [Mus musculus]                                         | 1714.9832 | 45.44  | 0.578131042 |
| 6677771  | ILTFDQLALESPPK          |                    | ribosomal protein L18 [Mus musculus]                                                             | 1474.8065 | 72.1   | 0           |
| 42734449 | ILYLFYEDMK              |                    | sulfotransferase family 1D, member 1 [Mus musculus]                                              | 1334.6644 | 40.57  | 0           |
| 34538601 | ILYMMDEINNPVLTVK        |                    | cytochrome c oxidase subunit II [Mus musculus]                                                   | 1892.9849 | 39.95  | 0           |
| 31980648 | IMDPNIVGNEHYDVAR        |                    | ATP synthase, H+ transporting mitochondrial F1 complex, beta subunit [Mus musculus]              | 1842.8832 | 66.72  | 0.338660538 |
| 31980648 | IMDPNIVGNEHYDVAR        | Oxidation (M)      | ATP synthase, H+ transporting mitochondrial F1 complex, beta subunit [Mus musculus]              | 1858.8738 | 30.74  | 0.553648814 |
| 18152793 | IMEGPAFNFLDAPAVR        |                    | pyruvate dehydrogenase (lipoamide) beta [Mus musculus]                                           | 1747.8889 | 82.27  | 0           |
| 18152793 | IMEGPAFNFLDAPAVR        | Oxidation (M)      | pyruvate dehydrogenase (lipoamide) beta [Mus musculus]                                           | 1763.8773 | 23.46  | 0           |
| 20137006 | IMGIPEDQMGLLR           |                    | myosin, heavy polypeptide 9, non-muscle [Mus musculus]                                           | 1601.8058 | 61.64  | 0.938729202 |
| 33859482 | IMGPNYTPGK              |                    | eukaryotic translation elongation factor 2 [Mus musculus]                                        | 1077.537  | 42.36  | 1.242985901 |

|          |                        |                  |                                                                                                     |           |        |             |
|----------|------------------------|------------------|-----------------------------------------------------------------------------------------------------|-----------|--------|-------------|
| 6755372  | IMLPWDPSGK             |                  | ribosomal protein S3 [Mus musculus]                                                                 | 1143.5681 | 22.85  | 0.409142846 |
| 30425202 | IMNHSSILR              | Deamidation (NQ) | nicotinamide nucleotide adenyltransferase 2 [Mus musculus]                                          | 1071.579  | 23.76  | 0           |
| 22165384 | IMNTFSVVPSPK           |                  | tubulin, beta, 2 [Mus musculus]                                                                     | 1319.6998 | 67.43  | 0           |
| 12963615 | IMNTFSVVPSPK           |                  | tubulin, beta 3 [Mus musculus]                                                                      | 1319.6998 | 67.43  | 0           |
| 31981939 | IMNTFSVVPSPK           |                  | tubulin, beta 4 [Mus musculus]                                                                      | 1319.6998 | 67.43  | 0           |
| 7106439  | IMNTFSVVPSPK           |                  | tubulin, beta 5 [Mus musculus]                                                                      | 1319.6998 | 67.43  | 0           |
| 22165384 | IMNTFSVVPSPK           | Oxidation (M)    | tubulin, beta, 2 [Mus musculus]                                                                     | 1335.6882 | 36.54  | 0.731535649 |
| 12963615 | IMNTFSVVPSPK           | Oxidation (M)    | tubulin, beta 3 [Mus musculus]                                                                      | 1335.6882 | 36.54  | 0.731535649 |
| 31981939 | IMNTFSVVPSPK           | Oxidation (M)    | tubulin, beta 4 [Mus musculus]                                                                      | 1335.6882 | 36.54  | 0.731535649 |
| 7106439  | IMNTFSVVPSPK           | Oxidation (M)    | tubulin, beta 5 [Mus musculus]                                                                      | 1335.6882 | 36.54  | 0.731535649 |
| 31980648 | IMNVIGEPIDER           |                  | ATP synthase, H+ transporting mitochondrial F1 complex, beta subunit [Mus musculus]                 | 1385.7112 | 68.78  | 0.541075535 |
| 31981549 | IMYLSEAYFR             |                  | sulfide quinone reductase-like [Mus musculus]                                                       | 1292.637  | 35.17  | 0           |
| 29244556 | INAGMYILSPAFLQR        |                  | GDP-mannose pyrophosphorylase B [Mus musculus]                                                      | 1645.8782 | 25.76  | 0           |
| 6678499  | INAWNSPTLPIYEPGLK      |                  | UDP-glucose dehydrogenase [Mus musculus]                                                            | 1913.0159 | 65.17  | 2.061730949 |
| 6724311  | INEAFDLLR              |                  | alcohol dehydrogenase 1 (class I) [Mus musculus]                                                    | 1090.5908 | 63.61  | 0.266479541 |
| 31542111 | INESDPEYLR             |                  | adducin 3 (gamma) [Mus musculus]                                                                    | 1235.5946 | 37.34  | 0           |
| 13384736 | INEWLTLVEK             |                  | dynein, cytoplasmic, heavy chain 1 [Mus musculus]                                                   | 1244.6729 | 26.68  | 0           |
| 51772556 | INFDDNAEFR             |                  | PREDICTED: similar to Succinate-Coenzyme A ligase, GDP-forming, beta subunit [Mus musculus]         | 1240.5569 | 59.9   | 0.281041308 |
| 46849708 | INFDSNSAYR             |                  | succinate-Coenzyme A ligase, ADP-forming, beta subunit [Mus musculus]                               | 1186.563  | 47.79  | 0.378083614 |
| 33598964 | INFDTVGYIVGANIETYLLEK  |                  | myosin heavy chain 10, non-muscle [Mus musculus]                                                    | 2372.2383 | 46.77  | 0           |
| 7305295  | INFDTVGYIVGANIETYLLEK  |                  | myosin, heavy polypeptide 11, smooth muscle [Mus musculus]                                          | 2372.2383 | 46.77  | 0           |
| 33563250 | INLPIQTFSALNFR         |                  | desmin [Mus musculus]                                                                               | 1633.9103 | 71.43  | 0.073690736 |
| 33563250 | INLPIQTFSALNFR         | Deamidation (NQ) | desmin [Mus musculus]                                                                               | 1634.8793 | 27.83  | 0           |
| 31560666 | INQDPLGIQGR            |                  | N-acetyl galactosaminidase, alpha [Mus musculus]                                                    | 1210.6554 | 31.6   | 0.472493708 |
| 18034773 | INQFYGAPTAVR           |                  | acetyl-CoA synthetase 2-like [Mus musculus]                                                         | 1336.6973 | 24.55  | 0.386469986 |
| 19526986 | INVPLGSGAIGNPLGVDR     |                  | argininosuccinate lyase [Mus musculus]                                                              | 1933.0846 | 43.49  | 0           |
| 27804325 | INVLVLEAR              |                  | monoamine oxidase A [Mus musculus]                                                                  | 1026.6289 | 39.69  | 0.188313323 |
| 33859753 | INVNEIFYDLVR           |                  | RAS related protein 1b [Mus musculus]                                                               | 1494.7963 | 64.45  | 0.374096157 |
| 33859488 | INVYYNEAAGNK           |                  | tubulin, beta 2 [Mus musculus]                                                                      | 1355.6626 | 61.05  | 0.509154531 |
| 22165384 | INVYYNEATGGK           |                  | tubulin, beta, 2 [Mus musculus]                                                                     | 1328.6465 | 81.45  | 0.34237541  |
| 21313144 | IPAFLNVDIAGLVK         |                  | GTP-binding protein PTD004 [Mus musculus]                                                           | 1568.9402 | 36.28  | 0           |
| 16716467 | IPAGTTLTLDMLTVK        |                  | N-acetylneuraminic acid synthase (sialic acid synthase) [Mus musculus]                              | 1573.8822 | 63     | 0.703647136 |
| 30911099 | IPALLNTQPMQLQEYATDR    |                  | fatty acid synthase [Mus musculus]                                                                  | 2288.1975 | 32.67  | 0.695526315 |
| 22094989 | IPDEFDSPIVLVQQLR       |                  | translocase of inner mitochondrial membrane 50 homolog [Mus musculus]                               | 1884.9661 | 56.59  | 0.333494923 |
| 21312062 | IPDQLVILDMK            |                  | transmembrane trafficking protein [Mus musculus]                                                    | 1284.7155 | 45.57  | 0           |
| 6755368  | IPDWFLNR               |                  | ribosomal protein S18 [Mus musculus]                                                                | 1060.5604 | 38.32  | 0.417050369 |
| 31560444 | IPEGPIDQGTATGR         |                  | fucosyltransferase 8 [Mus musculus]                                                                 | 1411.7158 | 63.94  | 0.332446511 |
| 22164798 | IPGGPQMQLSLDGK         |                  | selenium binding protein 1 [Mus musculus]                                                           | 1553.8225 | 53.81  | 1.134101215 |
| 21313526 | IPLDAYQPYLPGPTPK       |                  | hypothetical protein LOC78906 [Mus musculus]                                                        | 1729.9083 | 35.75  | 0           |
| 31980648 | IPSAVGYQPTLATDMGTMQER  |                  | ATP synthase, H+ transporting mitochondrial F1 complex, beta subunit [Mus musculus]                 | 2266.0906 | 108.66 | 0.387132457 |
| 31980648 | IPSAVGYQPTLATDMGTMQER  | Oxidation (M)    | ATP synthase, H+ transporting mitochondrial F1 complex, beta subunit [Mus musculus]                 | 2282.0835 | 23.96  | 0.303151937 |
| 31980648 | IPVGPETLGR             |                  | ATP synthase, H+ transporting mitochondrial F1 complex, beta subunit [Mus musculus]                 | 1038.5938 | 57.83  | 0.43647942  |
| 6671622  | IPWFQYPIIIDIR          |                  | B-cell receptor-associated protein 37 [Mus musculus]                                                | 1723.9232 | 52.09  | 0           |
| 63660294 | IPYLPITNFNQNWQDGK      |                  | PREDICTED: similar to Filamin B (FLN-B) (Beta-filamin) (Actin-binding like protein) (ABP-280-like p | 2048.0186 | 38.56  | 0.611106279 |
| 9790077  | IQAAASPPANATAASDTNAGDR |                  | glycogen synthase kinase 3 beta [Mus musculus]                                                      | 2069.9895 | 42.08  | 0.776438957 |
| 20137008 | IQAIELEDLLR            |                  | biglycan [Mus musculus]                                                                             | 1312.7467 | 37.31  | 0.216802265 |
| 21313620 | IQDALSTVLQYAEDVLSGK    |                  | eukaryotic translation initiation factor 3, subunit 5 (epsilon) [Mus musculus]                      | 2050.0486 | 35.41  | 0           |
| 13385310 | IQEGVESLAGYADIFLR      |                  | propionyl Coenzyme A carboxylase, beta polypeptide [Mus musculus]                                   | 1880.9762 | 25.45  | 0.500622591 |
| 10946940 | IQEGVFDINNEANGIK       |                  | RAB2, member RAS oncogene family [Mus musculus]                                                     | 1760.8787 | 83.67  | 0.77745232  |
| 46593021 | IQEVDAQMLR             |                  | ubiquinol-cytochrome c reductase core protein 1 [Mus musculus]                                      | 1202.6177 | 65.14  | 0           |
| 6678790  | IQFGTLSDYFDALEK        |                  | mannosidase 2, alpha 1 [Mus musculus]                                                               | 1746.868  | 44.4   | 0           |
| 6753498  | IQFNESFAEMNR           |                  | cytochrome c oxidase subunit IV isoform 1 [Mus musculus]                                            | 1485.6807 | 50.83  | 0.789488172 |
| 58037546 | IQGGSVVEMQGDDEMTR      |                  | isocitrate dehydrogenase 1 (NADP+), soluble [Mus musculus]                                          | 1736.8014 | 37.09  | 0           |
| 7657429  | IQIEGDPDFR             |                  | osteoblast specific factor 2 (fasciclin I-like) [Mus musculus]                                      | 1189.5852 | 41.79  | 0           |
| 31559981 | IQIWDTAGQER            |                  | RAB15, member RAS oncogene family [Mus musculus]                                                    | 1316.6602 | 72.13  | 0.507092936 |
| 31560030 | IQLVEEELDR             |                  | tropomyosin 1, alpha [Mus musculus]                                                                 | 1243.6563 | 57.68  | 0.453250964 |
| 11875203 | IQLVEEELDR             |                  | tropomyosin 2, beta [Mus musculus]                                                                  | 1243.6563 | 57.68  | 0.453250964 |
| 40254525 | IQLVEEELDR             |                  | tropomyosin 3, gamma [Mus musculus]                                                                 | 1243.6563 | 57.68  | 0.453250964 |
| 33859600 | IQNAGGSVMIQR           |                  | protein phosphatase 1B, magnesium dependent, beta isoform [Mus musculus]                            | 1273.6667 | 29.31  | 0           |
| 19527388 | IQQEIAVQNPLVSR         |                  | OTU domain, ubiquitin aldehyde binding 1 [Mus musculus]                                             | 1723.9301 | 36.02  | 0.354006474 |

|          |                                 |                    |                                                                                              |           |       |             |
|----------|---------------------------------|--------------------|----------------------------------------------------------------------------------------------|-----------|-------|-------------|
| 27477057 | IQQLNEEVGR                      |                    | translocated promoter region protein [Mus musculus]                                          | 1185.6273 | 23.86 | 0           |
| 19526818 | IQTQPGYANTLR                    |                    | solute carrier family 25 (mitochondrial carrier, phosphate carrier), member 3 [Mus musculus] | 1361.7238 | 60.03 | 0.396176111 |
| 31981246 | IQTYLESTKPIIDL YEEMGK           |                    | UMP-CMP kinase [Mus musculus]                                                                | 2371.2017 | 41.53 | 0.56669038  |
| 51762762 | IQVLEEQLR                       | 2 Deamidation (NQ) | PREDICTED: similar to pleckstrin homology-like domain, family B, member 3 [Mus musculus]     | 1129.6134 | 28.26 | 0           |
| 63476037 | ISCSGNQLPTVR                    |                    | PREDICTED: procollagen, type VI, alpha 3 [Mus musculus]                                      | 1274.6476 | 41.21 | 0           |
| 23956396 | ISEIEDAAFLAR                    |                    | SPFH domain family, member 2 [Mus musculus]                                                  | 1334.6946 | 35.15 | 0.565515147 |
| 22165384 | ISEQFTAMFR                      |                    | tubulin, beta, 2 [Mus musculus]                                                              | 1229.6023 | 53.98 | 0           |
| 33859488 | ISEQFTAMFR                      |                    | tubulin, beta 2 [Mus musculus]                                                               | 1229.6023 | 53.98 | 0           |
| 12963615 | ISEQFTAMFR                      |                    | tubulin, beta 3 [Mus musculus]                                                               | 1229.6023 | 53.98 | 0           |
| 31981939 | ISEQFTAMFR                      |                    | tubulin, beta 4 [Mus musculus]                                                               | 1229.6023 | 53.98 | 0           |
| 7106439  | ISEQFTAMFR                      |                    | tubulin, beta 5 [Mus musculus]                                                               | 1229.6023 | 53.98 | 0           |
| 21746161 | ISEQFTAMFR                      |                    | tubulin, beta [Mus musculus]                                                                 | 1229.6023 | 53.98 | 0           |
| 22122523 | ISFDLAEYADVDVGVGTLR             |                    | GDP-mannose 4, 6-dehydratase [Mus musculus]                                                  | 2041.9827 | 35.31 | 0.442993626 |
| 34328206 | ISFPAVQAAPSFNSFPK               |                    | tryptophanyl-tRNA synthetase [Mus musculus]                                                  | 1894.9569 | 55.02 | 0.31716545  |
| 51491845 | ISGETIFVTAPHEATAGIGVNR          |                    | clathrin, heavy polypeptide (Hc) [Mus musculus]                                              | 2353.2551 | 72.63 | 0           |
| 21361209 | ISGLIYEETR                      |                    | germinal histone H4 [Mus musculus]                                                           | 1180.6277 | 73.53 | 0           |
| 12963603 | ISLLQSEFPQAVYIDSYSSR            |                    | nuclear protein E3-3 [Mus musculus]                                                          | 2303.1602 | 29.59 | 0           |
| 31982755 | ISLPLPTFSSSLNR                  |                    | vimentin [Mus musculus]                                                                      | 1557.9039 | 72.41 | 0.367179076 |
| 63476037 | ISLSPEYVYVSTFR                  |                    | PREDICTED: procollagen, type VI, alpha 3 [Mus musculus]                                      | 1747.8969 | 72.96 | 0.734585474 |
| 45387933 | ISMINNPSQEISDSSTPIFR            |                    | UDP-glucose ceramide glucosyltransferase-like 1 [Mus musculus]                               | 2236.0979 | 98.75 | 1.389320617 |
| 6678499  | ISSINSISALCEATGADVVEEVATAIGMDQR |                    | UDP-glucose dehydrogenase [Mus musculus]                                                     | 3051.4648 | 75.3  | 0.286301761 |
| 6677813  | ISSLLEEQFQQGK                   |                    | ribosomal protein S8 [Mus musculus]                                                          | 1506.7769 | 81.14 | 0.457253676 |
| 6753320  | ISTPVDVNNR                      |                    | chaperonin subunit 3 (gamma) [Mus musculus]                                                  | 1114.5905 | 37.21 | 0.424252824 |
| 7106439  | ISVYYNEATGK                     |                    | tubulin, beta 5 [Mus musculus]                                                               | 1301.6379 | 86.34 | 2.504689991 |
| 31542095 | ITEEYYVHLIADNLPVATR             |                    | transmembrane 9 superfamily protein member 4 [Mus musculus]                                  | 2217.1392 | 33.74 | 0           |
| 31982522 | ITEIYEGTSEIQR                   |                    | acyl-Coenzyme A dehydrogenase, short chain [Mus musculus]                                    | 1538.7722 | 62.07 | 0.392093027 |
| 9789937  | ITFTGEADQAPGVEPGDIVLLQEK        |                    | DnaJ (Hsp40) homolog, subfamily A, member 2 [Mus musculus]                                   | 2640.3777 | 64.63 | 0.611351984 |
| 12963691 | ITGWGEETLPDGR                   |                    | tubulointerstitial nephritis antigen-like [Mus musculus]                                     | 1430.692  | 57.82 | 0.31237551  |
| 31981562 | ITLDNAYMEK                      |                    | pyruvate kinase 3 [Mus musculus]                                                             | 1197.5768 | 43.39 | 0.306148732 |
| 6679291  | ITLPVDFVTADKFDENAK              |                    | phosphoglycerate kinase 1 [Mus musculus]                                                     | 2023.042  | 64.82 | 0.441999565 |
| 6754480  | ITMQNLNDR                       |                    | keratin 13 [Mus musculus]                                                                    | 1104.5494 | 47.09 | 0           |
| 6680606  | ITMQNLNDR                       |                    | keratin complex 1, acidic, gene 19 [Mus musculus]                                            | 1104.5494 | 47.09 | 0           |
| 6016411  | ITMQNLNDR                       |                    | Keratin, type I cytoskeletal 13 (Cytokeratin 13) (K13) (CK 13)                               | 1104.5494 | 47.09 | 0           |
| 125081   | ITMQNLNDR                       |                    | Keratin, type I cytoskeletal 15 (Cytokeratin 15) (K15) (CK 15)                               | 1104.5494 | 47.09 | 0           |
| 6754480  | ITMQNLNDR                       | Oxidation (M)      | keratin 13 [Mus musculus]                                                                    | 1120.5341 | 29.52 | 0           |
| 6680606  | ITMQNLNDR                       | Oxidation (M)      | keratin complex 1, acidic, gene 19 [Mus musculus]                                            | 1120.5341 | 29.52 | 0           |
| 6016411  | ITMQNLNDR                       | Oxidation (M)      | Keratin, type I cytoskeletal 13 (Cytokeratin 13) (K13) (CK 13)                               | 1120.5341 | 29.52 | 0           |
| 125081   | ITMQNLNDR                       | Oxidation (M)      | Keratin, type I cytoskeletal 15 (Cytokeratin 15) (K15) (CK 15)                               | 1120.5341 | 29.52 | 0           |
| 34328204 | ITPAHDQNDYEVGQR                 |                    | valyl-tRNA synthetase 2 [Mus musculus]                                                       | 1742.8121 | 42.18 | 0.452154019 |
| 31981722 | ITPSYVAFTPEGER                  |                    | heat shock 70kD protein 5 (glucose-regulated protein) [Mus musculus]                         | 1566.7823 | 88.29 | 0.495442077 |
| 9790073  | ITQVQWNDPGAQYSLVNK              |                    | cadherin 17 [Mus musculus]                                                                   | 2061.0413 | 43.99 | 1.003125737 |
| 54287684 | ITSLEVENQNLN                    |                    | eukaryotic translation elongation factor 1 delta isoform b [Mus musculus]                    | 1415.7518 | 49.35 | 2.405552592 |
| 63680429 | ITVAGQNCAFEPR                   |                    | PREDICTED: plexin B2 [Mus musculus]                                                          | 1405.6901 | 32.03 | 0           |
| 6678331  | ITWIYNNR                        |                    | transglutaminase 3, E polypeptide [Mus musculus]                                             | 1079.5665 | 37.77 | 0           |
| 6680960  | ITYQPSTGEGNEQTITVGGR            |                    | procollagen, type XII, alpha 1 [Mus musculus]                                                | 2108.0264 | 93.75 | 0.264588662 |
| 7106435  | ITYVPMTGGAPSMVTDGTDTETR         |                    | tenascin C [Mus musculus]                                                                    | 2499.1765 | 59.24 | 0.218194485 |
| 23956096 | IVAFENAFER                      |                    | vesicle docking protein [Mus musculus]                                                       | 1195.6073 | 26.98 | 0.836265862 |
| 21450277 | IVEIPFNSTNK                     |                    | Na+/K+ -ATPase alpha 1 subunit [Mus musculus]                                                | 1261.6704 | 49.68 | 0.383054817 |
| 63476037 | IVEYLDIGFDTTR                   |                    | PREDICTED: procollagen, type VI, alpha 3 [Mus musculus]                                      | 1541.7839 | 73.23 | 0           |
| 8393866  | IVFADGNFWR                      |                    | ornithine aminotransferase [Mus musculus]                                                    | 1281.6375 | 24.92 | 0.344358074 |
| 33598964 | IVFQEFR                         |                    | myosin heavy chain 10, non-muscle [Mus musculus]                                             | 938.5141  | 35.97 | 0.099904665 |
| 7305295  | IVFQEFR                         |                    | myosin, heavy polypeptide 11, smooth muscle [Mus musculus]                                   | 938.5141  | 35.97 | 0.099904665 |
| 6753010  | IVFDPSLTVR                      |                    | anterior gradient 2 [Mus musculus]                                                           | 1245.7294 | 82.76 | 0.381242828 |
| 19527028 | IVGELEQMVSDEVPLDHR              |                    | high density lipoprotein binding protein [Mus musculus]                                      | 2066.0151 | 34.39 | 1.57858863  |
| 7305619  | IVLPDYLEIAR                     |                    | ubiquitin specific protease 5 (isopeptidase T) [Mus musculus]                                | 1414.8302 | 61.61 | 0.376106559 |
| 33859580 | IVLDFR                          |                    | galectin-3 [Mus musculus]                                                                    | 762.454   | 39.45 | 0.582360789 |
| 51491845 | IVLDNSVFSEHR                    |                    | clathrin, heavy polypeptide (Hc) [Mus musculus]                                              | 1415.7133 | 40.6  | 0           |
| 40254595 | IVLEDGTLHVTEGSGR                |                    | dihydropyrimidinase-like 2 [Mus musculus]                                                    | 1682.864  | 30.71 | 0           |
| 6754482  | IVLQIDNAR                       |                    | keratin complex 1, acidic, gene 18 [Mus musculus]                                            | 1041.6018 | 32.43 | 0.339846214 |
| 6680606  | IVLQIDNAR                       |                    | keratin complex 1, acidic, gene 19 [Mus musculus]                                            | 1041.6018 | 32.43 | 0.339846214 |

|          |                         |                  |                                                                                                     |           |        |             |
|----------|-------------------------|------------------|-----------------------------------------------------------------------------------------------------|-----------|--------|-------------|
| 125083   | IVLQIDNAR               |                  | Keratin, type I cytoskeletal 18 (Cytokeratin 18) (K18) (CK 18)                                      | 1041.6018 | 32.43  | 0.339846214 |
| 417200   | IVLQIDNAR               |                  | Keratin, type I cytoskeletal 19 (Cytokeratin 19) (K19) (CK 19)                                      | 1041.6018 | 32.43  | 0.339846214 |
| 24418919 | IVNGWQVEEADDWLR         |                  | brain glycogen phosphorylase [Mus musculus]                                                         | 1829.8843 | 55.47  | 0.239212958 |
| 24418919 | IVNGWQVEEADDWLR         | Deamidation (NQ) | brain glycogen phosphorylase [Mus musculus]                                                         | 1830.8817 | 46.46  | 0           |
| 31981246 | IVPVEITISLLK            |                  | UMP-CMP kinase [Mus musculus]                                                                       | 1324.8423 | 60.23  | 0.335640299 |
| 31560353 | IVQAEGNILQR             |                  | solute carrier family 6 (neurotransmitter transporter), member 14 [Mus musculus]                    | 1240.7012 | 22.24  | 0.836552994 |
| 28173568 | IVQMTAEVR               |                  | protein phosphatase 1, catalytic subunit, beta [Mus musculus]                                       | 1175.6105 | 24.93  | 0           |
| 63630002 | IVSNASCTTNCLAPLAK       |                  | PREDICTED: similar to Glyceraldehyde-3-phosphate dehydrogenase (GAPDH) [Mus musculus]               | 1705.8571 | 119.69 | 0.606923974 |
| 6679937  | IVSNASCTTNCLAPLAK       |                  | similar to glyceraldehyde-3-phosphate dehydrogenase [Mus musculus]                                  | 1705.8571 | 119.69 | 0.606923974 |
| 63746482 | IVSPSGAAVPC             |                  | PREDICTED: filamin, alpha [Mus musculus]                                                            | 1128.6072 | 63.2   | 0           |
| 30023842 | IVSLLTLMMDGLK           |                  | valosin containing protein [Mus musculus]                                                           | 1430.8217 | 62.92  | 0           |
| 30023842 | IVSLLTLMMDGLK           | Oxidation (M)    | valosin containing protein [Mus musculus]                                                           | 1446.804  | 57.39  | 0.286451895 |
| 18079339 | IVYGHLDPPANQEIER        |                  | aconitase 2, mitochondrial [Mus musculus]                                                           | 1868.9152 | 74.85  | 0.27105032  |
| 8567336  | IWALGGVTSDR             |                  | chloride channel calcium activated 3 [Mus musculus]                                                 | 1174.6254 | 67.4   | 0           |
| 33859482 | IWCFGPDGTGPNLTDITK      |                  | eukaryotic translation elongation factor 2 [Mus musculus]                                           | 2048.0154 | 75.3   | 0.559913132 |
| 6678483  | IYDDDFQNLGDVAVNALDNIDAR |                  | ubiquitin-activating enzyme E1, Chr X [Mus musculus]                                                | 2614.2048 | 47.09  | 0.492079195 |
| 29568084 | IYDYSVIR                |                  | sorting nexin 9 [Mus musculus]                                                                      | 1142.585  | 23.52  | 6.252945713 |
| 33859554 | IYELAAGGTAVGTGLNTR      |                  | fumarate hydratase 1 [Mus musculus]                                                                 | 1763.9303 | 132.89 | 0.214519356 |
| 31980685 | IYGDNAVPR               |                  | glucosamine [Mus musculus]                                                                          | 1061.5391 | 27.7   | 0           |
| 8567390  | IYDDGLISLVVR            |                  | pyruvate kinase liver and red blood cell [Mus musculus]                                             | 1475.8486 | 48.67  | 0           |
| 51491845 | IYDSNNNPER              |                  | clathrin, heavy polypeptide (Hc) [Mus musculus]                                                     | 1334.6384 | 53.44  | 0.44269614  |
| 22122523 | IYLGQLECFSLGNLDAK       |                  | GDP-mannose 4, 6-dehydratase [Mus musculus]                                                         | 1883.9576 | 112.67 | 0           |
| 6671622  | IYLTADNLVNLQDESFTFR     |                  | B-cell receptor-associated protein 37 [Mus musculus]                                                | 2225.1401 | 77.41  | 0.258463754 |
| 19705578 | IYPEEMIQTGISAIDGMNSIAR  |                  | ATPase, H+ transporting, V1 subunit B, isoform 2 [Mus musculus]                                     | 2409.1843 | 22.24  | 0.318686755 |
| 6680618  | IYQIYEGTAQIQR           |                  | acetyl-Coenzyme A dehydrogenase, medium chain [Mus musculus]                                        | 1582.8241 | 33.73  | 0.672501144 |
| 6679299  | IYTSIGEDYDER            |                  | prohibitin [Mus musculus]                                                                           | 1460.6586 | 44.34  | 0.207636124 |
| 21703998 | IYVISLAEPR              |                  | aspartyl-tRNA synthetase [Mus musculus]                                                             | 1160.6559 | 30.44  | 0.399879405 |
| 22164798 | IYVVVDVSGSEPR           |                  | selenium binding protein 1 [Mus musculus]                                                           | 1233.6477 | 57.17  | 0.194538864 |
| 6754982  | IYWNDDLQDQYR            |                  | 3'-phosphoadenosine 5'-phosphosulfate synthase 1 [Mus musculus]                                     | 1442.6719 | 33.17  | 0           |
| 7304901  | KCYEAGMTLGARK           | Oxidation (M)    | androgen receptor [Mus musculus]                                                                    | 1443.7002 | 22.39  | 0           |
| 6671507  | KDLYANNVLSGGTTMYPGIADR  |                  | actin, alpha 2, smooth muscle, aorta [Mus musculus]                                                 | 2356.1628 | 135.84 | 0           |
| 6671507  | KDLYANNVLSGGTTMYPGIADR  | Deamidation (NQ) | actin, alpha 2, smooth muscle, aorta [Mus musculus]                                                 | 2357.1531 | 122.97 | 0           |
| 6671507  | KDLYANNVLSGGTTMYPGIADR  | Oxidation (M)    | actin, alpha 2, smooth muscle, aorta [Mus musculus]                                                 | 2372.1538 | 49.43  | 0           |
| 6671509  | KDLYANTVLSGGTTMYPGIADR  |                  | actin, beta, cytoplasmic [Mus musculus]                                                             | 2343.1619 | 82.12  | 0.411461786 |
| 29789191 | KEDGTFYEFGGDDIPEAPER    |                  | asparaginyl-tRNA synthetase [Mus musculus]                                                          | 2215.0022 | 51.23  | 0.52679447  |
| 7305295  | KLEDDILVMDDQNSK         |                  | myosin, heavy polypeptide 11, smooth muscle [Mus musculus]                                          | 1762.8458 | 31.88  | 0           |
| 6753262  | KLEVEANNAFDQYR          |                  | capping protein (actin filament) muscle Z-line, beta [Mus musculus]                                 | 1696.8252 | 49.42  | 0.334791859 |
| 27370092 | KYEEIDNAPEER            |                  | Tu translation elongation factor, mitochondrial [Mus musculus]                                      | 1492.6949 | 45.95  | 0           |
| 21704100 | LAFAFVSR                |                  | hydroxyacyl-Coenzyme A dehydrogenase/3-ketoacyl-Coenzyme A thiolase/enoyl-Coenzyme A hydratase (tri | 905.5204  | 27.6   | 0           |
| 31982099 | LAAIQESGVER             |                  | proteasome (prosome, macropain) subunit, beta type 6 [Mus musculus]                                 | 1172.6205 | 24.72  | 0.165995246 |
| 15617203 | LAALNPESNTSGLDIFAK      |                  | chloride intracellular channel 1 [Mus musculus]                                                     | 1860.9626 | 82.73  | 0           |
| 6678499  | LAANFLAQR               |                  | UDP-glucose dehydrogenase [Mus musculus]                                                            | 1074.6006 | 44.19  | 0.376704249 |
| 50355692 | LADALQELR               |                  | lamin A isoform A [Mus musculus]                                                                    | 1028.5742 | 31.72  | 0.316702839 |
| 31982522 | LADMALALESAR            |                  | acyl-Coenzyme A dehydrogenase, short chain [Mus musculus]                                           | 1260.6395 | 44.4   | 0           |
| 41322904 | LAEDEAFQR               |                  | plectin 1 isoform 1 [Mus musculus]                                                                  | 1078.5195 | 37.58  | 0.53516106  |
| 13624315 | LAELEAALQR              |                  | keratin complex 2, basic, gene 8 [Mus musculus]                                                     | 1113.6301 | 62.7   | 0.333335481 |
| 31560731 | LAEMPADSGYPAYLGR        |                  | ATPase, H+ transporting, V1 subunit A, isoform 1 [Mus musculus]                                     | 1781.8562 | 32.49  | 0           |
| 6753010  | LAEQFVLLNLVYETTDK       |                  | anterior gradient 2 [Mus musculus]                                                                  | 1996.066  | 87.74  | 0           |
| 51093840 | LAGFLDLTEQEFR           |                  | eukaryotic translation initiation factor 3 subunit 6 interacting protein [Mus musculus]             | 1538.7872 | 55.24  | 0           |
| 22164798 | LAGQIFLGGIVR            |                  | selenium binding protein 1 [Mus musculus]                                                           | 1330.7859 | 46.79  | 0.199686292 |
| 6678483  | LAGTQPLEVLEAVQR         |                  | ubiquitin-activating enzyme E1, Chr X [Mus musculus]                                                | 1623.9092 | 64.87  | 0.271295626 |
| 13624315 | LALDIEITTYR             |                  | keratin complex 2, basic, gene 8 [Mus musculus]                                                     | 1307.7236 | 54.49  | 0           |
| 33563266 | LALFNPVDSWDR            |                  | NADH dehydrogenase (ubiquinone) 1 alpha subcomplex, 4 [Mus musculus]                                | 1432.7262 | 42.59  | 0.442770094 |
| 23956396 | LALQDLTSMAPGLVIQAVR     |                  | SPFH domain family, member 2 [Mus musculus]                                                         | 2124.188  | 39.78  | 0.672248068 |
| 23956166 | LALSQQNQSSGAAGPTGK      |                  | cisplatin resistance-associated overexpressed protein [Mus musculus]                                | 1714.8724 | 84.13  | 0.473940464 |
| 51770896 | LAMQEFMILPVGASSFR       |                  | PREDICTED: similar to Alpha enolase (2-phospho-D-glycerate hydro-lyase) (Non-neural enolase) (NNE)  | 1896.9758 | 73.58  | 0           |
| 51770896 | LAMQEFMILPVGASSFR       | Oxidation (M)    | PREDICTED: similar to Alpha enolase (2-phospho-D-glycerate hydro-lyase) (Non-neural enolase) (NNE)  | 1912.9664 | 29.31  | 0           |
| 6678103  | LANSAFVDFLK             |                  | serine (or cysteine) proteinase inhibitor, clade B, member 5 [Mus musculus]                         | 1295.6937 | 44.82  | 0           |
| 51768219 | LAPAVLLSGLTEVPVPTR      |                  | PREDICTED: similar to sodium bicarbonate cotransporter 2b [Mus musculus]                            | 1833.0834 | 31.48  | 0           |
| 46430508 | LAPDYDALDVANK           |                  | ribosomal protein L23a [Mus musculus]                                                               | 1404.6958 | 62.98  | 0.557712683 |

|          |                               |                                 |                                                                                                    |           |        |             |
|----------|-------------------------------|---------------------------------|----------------------------------------------------------------------------------------------------|-----------|--------|-------------|
| 6679687  | LAPEYEAATR                    |                                 | glucose regulated protein [Mus musculus]                                                           | 1191.6022 | 36.07  | 0.659002613 |
| 31981562 | LAPITSDPTAAAVGAVEASFK         |                                 | pyruvate kinase 3 [Mus musculus]                                                                   | 2145.1101 | 130.59 | 0.532897577 |
| 6755809  | LAQAAQSSVATITR                |                                 | talin 1 [Mus musculus]                                                                             | 1416.7867 | 60.54  | 0           |
| 29336026 | LAQAEEQLEQESR                 |                                 | nonmuscle myosin heavy chain [Mus musculus]                                                        | 1530.743  | 69.83  | 0.403494476 |
| 19527018 | LAQDFLDSQNL SAYNTR            |                                 | dipeptidylpeptidase III [Mus musculus]                                                             | 1955.9493 | 96.33  | 0           |
| 18079351 | LAQDPFPLYPGELLEK              |                                 | major vault protein [Mus musculus]                                                                 | 1829.9663 | 38.42  | 0.732493648 |
| 30794206 | LAQQQAALLMQQEEER              |                                 | splicing factor 3b, subunit 2 [Mus musculus]                                                       | 1756.9    | 36.07  | 7.071716886 |
| 6679651  | LAQSNWGVVMVSHR                |                                 | enolase 3, beta muscle [Mus musculus]                                                              | 1541.7599 | 52.91  | 0.459402849 |
| 51770896 | LAQSNWGVVMVSHR                | Deamidation (NQ)                | PREDICTED: similar to Alpha enolase (2-phospho-D-glycerate hydro-lyase) (Non-neural enolase) (NNE) | 1541.7599 | 52.91  | 0.459402849 |
| 6679651  | LAQSNWGVVMVSHR                | Deamidation (NQ)                | enolase 3, beta muscle [Mus musculus]                                                              | 1542.7531 | 25.04  | 0           |
| 51770896 | LAQSNWGVVMVSHR                | Deamidation (NQ)                | PREDICTED: similar to Alpha enolase (2-phospho-D-glycerate hydro-lyase) (Non-neural enolase) (NNE) | 1542.7531 | 25.04  | 0           |
| 11230802 | LASDLLEWIR                    |                                 | actinin alpha 4 [Mus musculus]                                                                     | 1215.676  | 65.99  | 0.279758278 |
| 6755995  | LATGSDDNCAAFFEGPPFK           |                                 | WD repeat domain 1 [Mus musculus]                                                                  | 1986.8969 | 64.27  | 0           |
| 33186863 | LATQLTGPVMPPIR                |                                 | ribosomal protein L13 [Mus musculus]                                                               | 1396.7985 | 47.74  | 0.687436337 |
| 10946574 | LAVEALSSLDGDLSGR              |                                 | creatine kinase, brain [Mus musculus]                                                              | 1602.8336 | 47.08  | 0           |
| 63650229 | LAVNMVPPFR                    |                                 | PREDICTED: similar to TUBULIN BETA CHAIN (T BETA-15) [Mus musculus]                                | 1143.6393 | 39.3   | 0           |
| 63488040 | LAVNMVPPFR                    |                                 | PREDICTED: similar to tubulin Mbeta 1 [Mus musculus]                                               | 1143.6393 | 39.3   | 0           |
| 22165384 | LAVNMVPPFR                    |                                 | tubulin, beta, 2 [Mus musculus]                                                                    | 1143.6393 | 39.3   | 0           |
| 33859488 | LAVNMVPPFR                    |                                 | tubulin, beta 2 [Mus musculus]                                                                     | 1143.6393 | 39.3   | 0           |
| 12963615 | LAVNMVPPFR                    |                                 | tubulin, beta 3 [Mus musculus]                                                                     | 1143.6393 | 39.3   | 0           |
| 31981939 | LAVNMVPPFR                    |                                 | tubulin, beta 4 [Mus musculus]                                                                     | 1143.6393 | 39.3   | 0           |
| 7106439  | LAVNMVPPFR                    |                                 | tubulin, beta 5 [Mus musculus]                                                                     | 1143.6393 | 39.3   | 0           |
| 27754056 | LAVNMVPPFR                    |                                 | tubulin, beta 6 [Mus musculus]                                                                     | 1143.6393 | 39.3   | 0           |
| 21746161 | LAVNMVPPFR                    |                                 | tubulin, beta [Mus musculus]                                                                       | 1143.6393 | 39.3   | 0           |
| 50355692 | LAVYIDR                       |                                 | lamin A isoform A [Mus musculus]                                                                   | 849.485   | 36.29  | 0.289893306 |
| 33859506 | LCAIPNLR                      |                                 | albumin 1 [Mus musculus]                                                                           | 899.5171  | 30.17  | 0.057109864 |
| 6671507  | LCYVALDFENEMATAAASSSLEK       |                                 | actin, alpha 2, smooth muscle, aorta [Mus musculus]                                                | 2479.165  | 29.41  | 0           |
| 6671507  | LCYVALDFENEMATAAASSSLEK       | Deamidation (NQ)                | actin, alpha 2, smooth muscle, aorta [Mus musculus]                                                | 2480.1611 | 26.72  | 0           |
| 6671509  | LCYVALDFEQEMATAAASSSLEK       |                                 | actin, beta, cytoplasmic [Mus musculus]                                                            | 2493.1577 | 64.63  | 0           |
| 63652452 | LCYVALDFEQEMATAAASSSLEK       |                                 | PREDICTED: similar to cytoplasmic beta-actin [Mus musculus]                                        | 2493.1577 | 64.63  | 0           |
| 6671509  | LCYVALDFEQEMATAAASSSLEK       | Deamidation (NQ)                | actin, beta, cytoplasmic [Mus musculus]                                                            | 2494.1533 | 60.53  | 0.359185516 |
| 63652452 | LCYVALDFEQEMATAAASSSLEK       | Deamidation (NQ); Oxidation (M) | PREDICTED: similar to cytoplasmic beta-actin [Mus musculus]                                        | 2494.1533 | 60.53  | 0.359185516 |
| 6671509  | LCYVALDFEQEMATAAASSSLEK       | Deamidation (NQ); Oxidation (M) | actin, beta, cytoplasmic [Mus musculus]                                                            | 2510.1558 | 32.04  | 0           |
| 63652452 | LCYVALDFEQEMATAAASSSLEK       | Deamidation (NQ); Oxidation (M) | PREDICTED: similar to cytoplasmic beta-actin [Mus musculus]                                        | 2510.1558 | 32.04  | 0           |
| 7305295  | LDAFLVLEQLR                   |                                 | myosin, heavy polypeptide 11, smooth muscle [Mus musculus]                                         | 1316.7628 | 74.05  | 0.0943286   |
| 21312950 | LDDLINWAR                     |                                 | NADH dehydrogenase (ubiquinone) Fe-S protein 7 [Mus musculus]                                      | 1115.5759 | 50.23  | 0.21387914  |
| 6678143  | LDEGWVPLETMK                  |                                 | autoantigen La [Mus musculus]                                                                      | 1530.7837 | 26.08  | 0           |
| 30794450 | LDELYGTWR                     |                                 | ribosomal protein L4 [Mus musculus]                                                                | 1152.5802 | 31.53  | 0.557298099 |
| 21704206 | LDFTEEEELLSR                  |                                 | carboxylesterase 2 [Mus musculus]                                                                  | 1480.718  | 78.5   | 0.415269961 |
| 12963691 | LDGAWWFLR                     |                                 | tubulointerstitial nephritis antigen-like [Mus musculus]                                           | 1163.6025 | 28.8   | 0.232621849 |
| 20270275 | LDIDPETITWQR                  |                                 | methylenetetrahydrofolate dehydrogenase 1 [Mus musculus]                                           | 1486.7546 | 53.2   | 0.605523465 |
| 31981562 | LDIDSAPITAR                   |                                 | pyruvate kinase 3 [Mus musculus]                                                                   | 1171.6271 | 64.51  | 0.523468495 |
| 6677819  | LDILDTAGQEEFGAMR              |                                 | Harvey rat sarcoma oncogene, subgroup R [Mus musculus]                                             | 1765.8511 | 71.49  | 0           |
| 54607112 | LDLGSNEFTVEPVLEQLSGLR         |                                 | ErbB2 interacting protein isoform 2 [Mus musculus]                                                 | 2445.239  | 22.94  | 0           |
| 6753658  | LDLWNLNNDTEVPTASISVEGNPALNR   |                                 | dynein, cytoplasmic, intermediate chain 2 [Mus musculus]                                           | 2952.4575 | 93.08  | 0.434172485 |
| 6678359  | LDNLVAIFDINR                  |                                 | transketolase [Mus musculus]                                                                       | 1402.7684 | 83.16  | 0.471650171 |
| 58037546 | LDNNTLSFFAK                   |                                 | isocitrate dehydrogenase 1 (NADP+), soluble [Mus musculus]                                         | 1398.6777 | 42.72  | 0           |
| 33598964 | LDPHLVLDQLR                   |                                 | myosin heavy chain 10, non-muscle [Mus musculus]                                                   | 1318.7468 | 41     | 0           |
| 20137006 | LDPHLVLDQLR                   |                                 | myosin, heavy polypeptide 9, non-muscle [Mus musculus]                                             | 1318.7468 | 41     | 0           |
| 33859686 | LDQETAQWLR                    |                                 | phosphoglucomutase 1 [Mus musculus]                                                                | 1259.6404 | 46.82  | 1.022577777 |
| 30023842 | LDQLIYIPLPEK                  |                                 | valosin containing protein [Mus musculus]                                                          | 1556.8521 | 63.52  | 0           |
| 6678483  | LDQPMTEIVSR                   |                                 | ubiquitin-activating enzyme E1, Chr X [Mus musculus]                                               | 1288.6573 | 48.59  | 0           |
| 33859650 | LDQVLQWNR                     |                                 | membrane bound C2 domain containing protein [Mus musculus]                                         | 1171.6206 | 24.59  | 0.358513082 |
| 31981522 | LDSVESVLPYEYAFDFCQASEGK       |                                 | transmembrane 9 superfamily member 2 [Mus musculus]                                                | 2698.2395 | 71.26  | 0.688990552 |
| 42734399 | LDTQDTASSLQSDSTTETIAESIVTTILK |                                 | desmuslin isoform H [Mus musculus]                                                                 | 3068.5437 | 56.02  | 0           |
| 46559834 | LDTQDTASSLQSDSTTETIAESIVTTILK |                                 | desmuslin isoform M [Mus musculus]                                                                 | 3068.5437 | 56.02  | 0           |
| 55741829 | LDVATDNFFQNPPLYIR             |                                 | testis derived transcript 3 [Mus musculus]                                                         | 2055.0088 | 30.78  | 19.4070105  |
| 6677813  | LDVGNFSWGSECCTR               |                                 | ribosomal protein S8 [Mus musculus]                                                                | 1673.7021 | 43.74  | 0.432363409 |
| 13507628 | LDVSSVASDTER                  |                                 | LPS-responsive beige-like anchor [Mus musculus]                                                    | 1278.6256 | 23.39  | 0.219259103 |

|          |                             |               |                                                                                                     |           |        |             |
|----------|-----------------------------|---------------|-----------------------------------------------------------------------------------------------------|-----------|--------|-------------|
| 6754482  | LEAEIATYR                   |               | keratin complex 1, acidic, gene 18 [Mus musculus]                                                   | 1065.5527 | 28.39  | 0.729715861 |
| 125083   | LEAEIATYR                   |               | Keratin, type I cytoskeletal 18 (Cytokeratin 18) (K18) (CK 18)                                      | 1065.5527 | 28.39  | 0.729715861 |
| 13624315 | LEAELGNMQGLVEDFK            |               | keratin complex 2, basic, gene 8 [Mus musculus]                                                     | 1792.8784 | 120.85 | 0.683646221 |
| 63565108 | LEAELGNMQGLVEDFK            |               | PREDICTED: similar to cytokeratin EndoA - mouse [Mus musculus]                                      | 1792.8784 | 120.85 | 0.683646221 |
| 13624315 | LEAELGNMQGLVEDFK            | Oxidation (M) | keratin complex 2, basic, gene 8 [Mus musculus]                                                     | 1808.8723 | 53.2   | 0           |
| 63565108 | LEAELGNMQGLVEDFK            | Oxidation (M) | PREDICTED: similar to cytokeratin EndoA - mouse [Mus musculus]                                      | 1808.8723 | 53.2   | 0           |
| 18079339 | LEAPDAELPR                  |               | aconitase 2, mitochondrial [Mus musculus]                                                           | 1225.6013 | 68.24  | 0.248209806 |
| 6755817  | LEDKDDLVDVTELSNEELLDQLVR    |               | thymopoietin [Mus musculus]                                                                         | 2701.343  | 112.59 | 0.302100312 |
| 21312062 | LEDLSESVNDFAYMK             | Oxidation (M) | transmembrane trafficking protein [Mus musculus]                                                    | 1889.8776 | 57.75  | 0.327944103 |
| 33468903 | LEDVLPFAFTR                 |               | heterochromatin protein 1, binding protein 3 [Mus musculus]                                         | 1273.7155 | 32.74  | 0.300207074 |
| 6679261  | LEEGPPVTTVLTR               |               | pyruvate dehydrogenase E1 alpha 1 [Mus musculus]                                                    | 1411.7778 | 59.7   | 0           |
| 63592948 | LEELQLEFGR                  |               | PREDICTED: hypothetical protein LOC68553 [Mus musculus]                                             | 1362.6907 | 52.05  | 0           |
| 21704020 | LEEVSPNLVR                  |               | NADH dehydrogenase (ubiquinone) Fe-S protein 1 [Mus musculus]                                       | 1155.6362 | 24.08  | 0           |
| 7305295  | LEGDASDFHEQIADLQAQIAELK     |               | myosin, heavy polypeptide 11, smooth muscle [Mus musculus]                                          | 2541.2522 | 60.04  | 0           |
| 20137006 | LEGDSTDLSQIAELQAQIAELK      |               | myosin, heavy polypeptide 9, non-muscle [Mus musculus]                                              | 2487.2461 | 35.03  | 0           |
| 13624315 | LEGLTDEINFLR                |               | keratin complex 2, basic, gene 8 [Mus musculus]                                                     | 1419.7612 | 96.38  | 0.519751533 |
| 63565108 | LEGLTDEINFLR                |               | PREDICTED: similar to cytokeratin EndoA - mouse [Mus musculus]                                      | 1419.7612 | 96.38  | 0.519751533 |
| 19527018 | LEGSEVQLVVEYEAAGLIR         |               | dipeptidylpeptidase III [Mus musculus]                                                              | 2134.1028 | 37.35  | 0.69110544  |
| 63688576 | LEGWELFPTPK                 |               | PREDICTED: similar to NADH-ubiquinone oxidoreductase subunit B14.7 (Complex I-B14.7) (CI-B14.7) [Mu | 1316.6924 | 30.07  | 0           |
| 63618109 | LEIPAQLATLLER               |               | PREDICTED: similar to mKIAA1783 protein [Mus musculus]                                              | 1466.8608 | 29.4   | 0           |
| 55742711 | LEISDFSEAIGALR              |               | EH-domain containing 2 [Mus musculus]                                                               | 1649.8439 | 84.98  | 0.222422787 |
| 6680748  | LELAQYR                     |               | ATP synthase, H+ transporting, mitochondrial F1 complex, alpha subunit, isoform 1 [Mus musculus]    | 892.4902  | 29.31  | 0.348118287 |
| 13569841 | LELTPVAIQAGR                |               | thioredoxin reductase 1 [Mus musculus]                                                              | 1267.7411 | 32.61  | 0           |
| 51711855 | LENVSVALEFLER               |               | PREDICTED: similar to Filamin C (Gamma-filamin) (Filamin 2) (Protein FLNc) (Actin-binding like prot | 1518.8192 | 47.77  | 0.10096376  |
| 6754480  | LEQEIATYR                   |               | keratin 13 [Mus musculus]                                                                           | 1122.582  | 42.93  | 0.541154091 |
| 12803709 | LEQEIATYR                   |               | Keratin 14 [Homo sapiens]                                                                           | 1122.582  | 42.93  | 0.541154091 |
| 47679095 | LEQEIATYR                   |               | keratin 17n [Mus musculus]                                                                          | 1122.582  | 42.93  | 0.541154091 |
| 21592285 | LEQEIATYR                   |               | keratin 20 [Mus musculus]                                                                           | 1122.582  | 42.93  | 0.541154091 |
| 6680602  | LEQEIATYR                   |               | keratin complex 1, acidic, gene 15 [Mus musculus]                                                   | 1122.582  | 42.93  | 0.541154091 |
| 6680606  | LEQEIATYR                   |               | keratin complex 1, acidic, gene 19 [Mus musculus]                                                   | 1122.582  | 42.93  | 0.541154091 |
| 6016411  | LEQEIATYR                   |               | Keratin, type I cytoskeletal 13 (Cytokeratin 13) (K13) (CK 13)                                      | 1122.582  | 42.93  | 0.541154091 |
| 125081   | LEQEIATYR                   |               | Keratin, type I cytoskeletal 15 (Cytokeratin 15) (K15) (CK 15)                                      | 1122.582  | 42.93  | 0.541154091 |
| 547751   | LEQEIATYR                   |               | Keratin, type I cytoskeletal 17 (Cytokeratin 17) (K17) (CK 17) (39.1)                               | 1122.582  | 42.93  | 0.541154091 |
| 417200   | LEQEIATYR                   |               | Keratin, type I cytoskeletal 19 (Cytokeratin 19) (K19) (CK 19)                                      | 1122.582  | 42.93  | 0.541154091 |
| 6753620  | LEQELFSGGNTGINFEK           |               | DEAD/H (Asp-Glu-Ala-Asp/His) box polypeptide 3, X-linked [Mus musculus]                             | 1882.9139 | 69.76  | 0           |
| 63517295 | LEQVSSDEGIGTLAENLLEALR      |               | PREDICTED: RIKEN cDNA 1810009A16 [Mus musculus]                                                     | 2357.2087 | 40.18  | 0.593641397 |
| 21704156 | LEQYTNAIEGTK                |               | caldesmon 1 [Mus musculus]                                                                          | 1366.6804 | 78.02  | 0           |
| 29336026 | LESQLEVQGR                  |               | nonmuscle myosin heavy chain [Mus musculus]                                                         | 1286.6659 | 48.35  | 19.82810968 |
| 29789080 | LESTLNYGMER                 |               | coatamer protein complex, subunit beta 2 (beta prime) [Mus musculus]                                | 1312.6184 | 42.67  | 0           |
| 31982236 | LETTSNQDNLAPITAK            |               | integrin alpha 6 [Mus musculus]                                                                     | 1715.8721 | 28.75  | 0           |
| 63565108 | LEVDPNIQAVR                 |               | PREDICTED: similar to cytokeratin EndoA - mouse [Mus musculus]                                      | 1253.7015 | 68.42  | 0.670288845 |
| 6753262  | LEVEANNAFDQYR               |               | capping protein (actin filament) muscle Z-line, beta [Mus musculus]                                 | 1568.733  | 43.94  | 0           |
| 7305295  | LEVNMQALK                   |               | myosin, heavy polypeptide 11, smooth muscle [Mus musculus]                                          | 1045.5616 | 40.51  | 0           |
| 7305295  | LEVQLQDLQSK                 |               | myosin, heavy polypeptide 11, smooth muscle [Mus musculus]                                          | 1300.698  | 56.47  | 0           |
| 9790073  | LEVVTDPPTNAGYVK             |               | cadherin 17 [Mus musculus]                                                                          | 1606.8322 | 86.14  | 0           |
| 13928670 | LFDFSQVQVATVIQSR            |               | vacuolar protein sorting 35 [Mus musculus]                                                          | 1851.9932 | 24.8   | 0.496808164 |
| 7305173  | LFDAQAFVPR                  |               | heat shock protein 1 [Mus musculus]                                                                 | 1149.6058 | 58.67  | 0.155991041 |
| 31981147 | LFEASVETGDR                 |               | leucine aminopeptidase 3 [Mus musculus]                                                             | 1223.5894 | 29.95  | 0.57094675  |
| 63664040 | LFEEPEPDSNR                 |               | PREDICTED: alpha isoform of regulatory subunit B55, protein phosphatase 2 [Mus musculus]            | 1332.6272 | 23.6   | 0.295944511 |
| 19882225 | LFEFAGYDCLR                 |               | arginyl-tRNA synthetase [Mus musculus]                                                              | 1329.6858 | 36.62  | 0           |
| 55742711 | LFELEEQLFR                  |               | EH-domain containing 2 [Mus musculus]                                                               | 1438.7273 | 60.86  | 0.250830463 |
| 21313668 | LFENQLSGPESIVNIGDVLFTGTADGR |               | RIKEN cDNA 2310001A20 [Mus musculus]                                                                | 2849.4255 | 31.88  | 0.358287408 |
| 13384720 | LFGLSPFEPWTTK               |               | NADH dehydrogenase (ubiquinone) 1 alpha subcomplex, 9 [Mus musculus]                                | 1522.7869 | 23.85  | 0.334328025 |
| 21703832 | LFGPYVWGR                   |               | arginyl aminopeptidase (aminopeptidase B) [Mus musculus]                                            | 1094.5833 | 30.7   | 0.517809924 |
| 63650187 | LFIGGLNVQTSSEGLR            |               | PREDICTED: similar to heterogeneous nuclear ribonucleoprotein A0 [Mus musculus]                     | 1690.9116 | 45.41  | 0.356681475 |
| 31559916 | LFIGGLSFETDDSLR             |               | heterogeneous nuclear ribonucleoprotein A3 isoform b [Mus musculus]                                 | 1770.8914 | 116.76 | 0           |
| 6754220  | LFIGGLSFETTEDESLR           |               | heterogeneous nuclear ribonucleoprotein A1 [Mus musculus]                                           | 1784.9036 | 34.1   | 0           |
| 7949053  | LFIGGLSFETTEESLR            |               | heterogeneous nuclear ribonucleoprotein A2/B1 isoform 1 [Mus musculus]                              | 1798.922  | 104.51 | 0.445855163 |
| 19526826 | LFLAGYDPTPTMR               |               | vacuolar protein sorting 26 [Mus musculus]                                                          | 1481.7511 | 22.9   | 0.700267441 |
| 6680836  | LFPSGLDQK                   |               | calreticulin [Mus musculus]                                                                         | 1004.5358 | 27.24  | 0           |





|          |                        |                                                                                                     |           |        |             |
|----------|------------------------|-----------------------------------------------------------------------------------------------------|-----------|--------|-------------|
| 6678467  | LISQIVSSITASLR         | tubulin, alpha 4 [Mus musculus]                                                                     | 1487.8778 | 93.38  | 0.538307485 |
| 6678469  | LISQIVSSITASLR         | tubulin, alpha 6 [Mus musculus]                                                                     | 1487.8778 | 93.38  | 0.538307485 |
| 63561841 | LISWYDNEYGYSNR         | PREDICTED: similar to Glyceraldehyde-3-phosphate dehydrogenase (GAPDH) [Mus musculus]               | 1779.8027 | 91.5   | 0.52325999  |
| 6679937  | LISWYDNEYGYSNR         | similar to glyceraldehyde-3-phosphate dehydrogenase [Mus musculus]                                  | 1779.8027 | 91.5   | 0.52325999  |
| 31543689 | LIVENLSSR              | arginine/serine-rich splicing factor 6 [Mus musculus]                                               | 1030.5858 | 24.51  | 0           |
| 6677919  | LIVENLSSR              | splicing factor, arginine/serine-rich 5 (SRp40, HRS) [Mus musculus]                                 | 1030.5858 | 24.51  | 0           |
| 6680748  | LKEIVTNFLAGFEP         | ATP synthase, H+ transporting, mitochondrial F1 complex, alpha subunit, isoform 1 [Mus musculus]    | 1577.8569 | 103.44 | 0.30361788  |
| 6755082  | LLAEALNQVTQR           | protein kinase C, delta [Mus musculus]                                                              | 1355.765  | 35.93  | 0.368202845 |
| 31982122 | LLAQLTQECQEQR          | phospholipase C, beta 3 [Mus musculus]                                                              | 1559.7841 | 29.27  | 0           |
| 27370092 | LLDAVDTYIPVPTR         | Tu translation elongation factor, mitochondrial [Mus musculus]                                      | 1572.8624 | 69.6   | 0.614506423 |
| 6755002  | LLDEEEATDNDLR          | programmed cell death 6 interacting protein [Mus musculus]                                          | 1532.7098 | 46.19  | 0.746402321 |
| 6677801  | LLDFGSLSNLQVTQPTVGMNFK | ribosomal protein S17 [Mus musculus]                                                                | 2409.2498 | 59.86  | 0.712989141 |
| 15809004 | LLDFVLGQEUR            | cyclin M4 [Mus musculus]                                                                            | 1302.7448 | 57.1   | 0.19617142  |
| 55742711 | LLEALDDMLAQDIK         | EH-domain containing 2 [Mus musculus]                                                               | 1658.8632 | 82.09  | 1.8247012   |
| 55742711 | LLEALDDMLAQDIK         | EH-domain containing 2 [Mus musculus]                                                               | 1674.8409 | 40.08  | 0           |
| 21313234 | LLEENEAMSVTPSPAPVR     | BAI1-associated protein 2-like 1 [Mus musculus]                                                     | 2037.032  | 28.56  | 0.541436638 |
| 54607037 | LLELQEVDSLLR           | integrin beta 4 isoform 2 [Mus musculus]                                                            | 1427.8105 | 34.86  | 0.531505932 |
| 16716471 | LLENMTEVVR             | hypothetical protein LOC94184 [Mus musculus]                                                        | 1203.6398 | 37.94  | 2.550621417 |
| 6753066  | LLETEEEAFLPGGATPR      | amine oxidase, copper containing 3 [Mus musculus]                                                   | 1900.9635 | 84.26  | 0           |
| 29336026 | LLGLGVTDFSR            | nonmuscle myosin heavy chain [Mus musculus]                                                         | 1177.6593 | 47.22  | 0.311452222 |
| 6754256  | LLGQFTLIGIPPAPR        | heat shock protein 9A [Mus musculus]                                                                | 1592.9521 | 22.65  | 0.40983036  |
| 63746482 | LLGWIQNK               | PREDICTED: filamin, alpha [Mus musculus]                                                            | 971.5653  | 48.31  | 0.151044795 |
| 63660294 | LLGWIQNK               | PREDICTED: similar to Filamin B (FLN-B) (Beta-filamin) (Actin-binding like protein) (ABP-280-like p | 971.5653  | 48.31  | 0.151044795 |
| 51711855 | LLGWIQNK               | PREDICTED: similar to Filamin C (Gamma-filamin) (Filamin 2) (Protein FLNc) (Actin-binding like prot | 971.5653  | 48.31  | 0.151044795 |
| 10946574 | LLIEMEQR               | creatine kinase, brain [Mus musculus]                                                               | 1031.5552 | 25.5   | 0           |
| 6754524  | LLIVSNPVDILTYVAWK      | lactate dehydrogenase 1, A chain [Mus musculus]                                                     | 1944.1057 | 50.83  | 0           |
| 27370510 | LLIYNPEDPPGSEVLR       | paraoxonase 3 [Mus musculus]                                                                        | 1811.9476 | 27.61  | 0           |
| 51828444 | LLLDTFEYQGLVK          | PREDICTED: proline-rich polypeptide 6 [Mus musculus]                                                | 1538.8397 | 28.45  | 0           |
| 33468887 | LLLNNNDLLR             | capping protein (actin filament) muscle Z-line, alpha 1 [Mus musculus]                              | 1197.6963 | 41.36  | 0.693889074 |
| 30911099 | LLLPEDPLISGLLNSQALK    | fatty acid synthase [Mus musculus]                                                                  | 2034.1871 | 45.98  | 0.821891819 |
| 28316750 | LLLPGELAK              | histone 1, H2ba [Mus musculus]                                                                      | 953.6012  | 64.58  | 0.463228413 |
| 20874851 | LLLPGELAK              | PREDICTED: similar to histone H2b-616 [Mus musculus]                                                | 953.6012  | 64.58  | 0.463228413 |
| 51491845 | LLLPWLEAR              | clathrin, heavy polypeptide (Hc) [Mus musculus]                                                     | 1110.6698 | 43.01  | 0.351691306 |
| 12025542 | LLNFPPTIVER            | arsA (bacterial) arsenite transporter, ATP-binding, homolog 1 [Mus musculus]                        | 1201.6903 | 28.7   | 0.390957802 |
| 63556656 | LLNPQGAIR              | PREDICTED: RIKEN cDNA A430096B05 gene [Mus musculus]                                                | 981.5861  | 39.13  | 0.107027789 |
| 6680960  | LLPETPSDPAIWIQITDR     | procollagen, type XII, alpha 1 [Mus musculus]                                                       | 2099.0815 | 55.72  | 0           |
| 31981690 | LLQDFFNKG              | heat shock protein 8 [Mus musculus]                                                                 | 1081.5635 | 56.38  | 0.504988134 |
| 31981690 | LLQDFFNKG              | heat shock protein 8 [Mus musculus]                                                                 | 1082.5516 | 30.65  | 0           |
| 50080209 | LLQDFFNGR              | heat shock protein 1A [Mus musculus]                                                                | 1109.5787 | 45.37  | 0.216816506 |
| 31982755 | LLQDSVDFSLADAINTEFK    | vimentin [Mus musculus]                                                                             | 2126.0642 | 69.7   | 0           |
| 6678986  | LLQFYAETCPAPER         | myosin IC [Mus musculus]                                                                            | 1637.7972 | 22.66  | 2.712007869 |
| 24418919 | LLSLVDDEAFIR           | brain glycogen phosphorylase [Mus musculus]                                                         | 1390.7607 | 84.15  | 0.305506841 |
| 63562740 | LLTSAAFEDCQTR          | PREDICTED: similar to secreted gel-forming mucin [Mus musculus]                                     | 1454.6998 | 83.25  | 0.252489305 |
| 33859650 | LLVPLVPDLQDVAQLR       | membrane bound C2 domain containing protein [Mus musculus]                                          | 1789.0621 | 45.46  | 0.291748776 |
| 6755566  | LLVDPETDER             | solute carrier family 9 (sodium/hydrogen exchanger), isoform 3 regulator 1 [Mus musculus]           | 1285.6494 | 33.13  | 0.33861598  |
| 31981826 | LLYDLADQLHAAVGSAR      | electron transferring flavoprotein, alpha polypeptide [Mus musculus]                                | 1812.9546 | 23.19  | 0           |
| 28077013 | LLYEANLPENFR           | stromal membrane-associated protein 1 [Mus musculus]                                                | 1478.7661 | 41.88  | 1.43496168  |
| 51491845 | LLYNNVSNFGR            | clathrin, heavy polypeptide (Hc) [Mus musculus]                                                     | 1296.6725 | 65.42  | 0.33540301  |
| 7657429  | LLYPADIPVGNLQLELLNK    | osteoblast specific factor 2 (fasciclin I-like) [Mus musculus]                                      | 2238.239  | 36.36  | 0.346246925 |
| 29336026 | LMATLSNTNPSFVR         | nonmuscle myosin heavy chain [Mus musculus]                                                         | 1550.8025 | 22.97  | 0           |
| 19923052 | LMDEVAGIVAAR           | brain acyl-CoA hydrolase [Mus musculus]                                                             | 1244.6575 | 43.71  | 0           |
| 31560689 | LMFNDFLSSSSDK          | 3-hydroxy-3-methylglutaryl-Coenzyme A synthase 2 [Mus musculus]                                     | 1490.7034 | 40.89  | 0           |
| 30794402 | LMILFNK                | hypothetical protein LOC70950 [Mus musculus]                                                        | 894.5214  | 33.14  | 0.250017584 |
| 59709449 | LMLLLEVISGER           | actinin alpha 2 [Mus musculus]                                                                      | 1372.7905 | 37.62  | 0           |
| 11230802 | LMLLLEVISGER           | actinin alpha 4 [Mus musculus]                                                                      | 1372.7905 | 37.62  | 0           |
| 6680986  | LNDFASAVR              | cytochrome c oxidase, subunit Va [Mus musculus]                                                     | 992.5175  | 38.44  | 0.491141291 |
| 63641940 | LNSILQATEQR            | PREDICTED: desmoplakin [Mus musculus]                                                               | 1387.7166 | 34.67  | 0           |
| 19882225 | LNDYIFSFDK             | arganyl-tRNA synthetase [Mus musculus]                                                              | 1261.614  | 39.02  | 0           |
| 6755809  | LNEAAAGLNQAATELVQASR   | talin 1 [Mus musculus]                                                                              | 2027.052  | 90.15  | 0.38332862  |
| 6755809  | LNEAAAGLNQAATELVQASR   | talin 1 [Mus musculus]                                                                              | 2029.0574 | 38.7   | 0           |

|          |                             |                                                                                                     |           |        |             |
|----------|-----------------------------|-----------------------------------------------------------------------------------------------------|-----------|--------|-------------|
| 6679687  | LNFVASR                     | glucose regulated protein [Mus musculus]                                                            | 877.4917  | 50.29  | 0.300813822 |
| 21704100 | LNFLSPELPVAEFSTNETMGHSADR   | hydroxyacyl-Coenzyme A dehydrogenase/3-ketoacyl-Coenzyme A thiolase/enoyl-Coenzyme A hydratase (tri | 2833.3403 | 32.58  | 0.207415908 |
| 21450277 | LNIPVNVQVNP                 | Na+/K+ -ATPase alpha 1 subunit [Mus musculus]                                                       | 1263.7222 | 42.74  | 0.487077721 |
| 45387933 | LNIQPSSETDYAVDIR            | UDP-glucose ceramide glucosyltransferase-like 1 [Mus musculus]                                      | 1733.8674 | 60.57  | 0.346733602 |
| 63476037 | LNLLDDYELAEQLDNIAEK         | PREDICTED: procollagen, type VI, alpha 3 [Mus musculus]                                             | 2332.1926 | 85.79  | 0.160625191 |
| 55742711 | LNPFNGTFLNR                 | EH-domain containing 2 [Mus musculus]                                                               | 1292.6715 | 32.48  | 0           |
| 22164798 | LNPNFLVDFGK                 | selenium binding protein 1 [Mus musculus]                                                           | 1263.6692 | 53.61  | 0.123805361 |
| 15638942 | LNSLVSEK                    | Deamidation (NQ)<br>carnitine deficiency-associated gene expressed in ventricle 1 [Mus musculus]    | 890.4778  | 25.38  | 0           |
| 13384736 | LNTQEIFDDWAR                | dynein, cytoplasmic, heavy chain 1 [Mus musculus]                                                   | 1507.7318 | 41.87  | 0.570937668 |
| 6677819  | LNVDEAFEQLVR                | Harvey rat sarcoma oncogene, subgroup R [Mus musculus]                                              | 1432.7421 | 39.86  | 0           |
| 33563270 | LNVLANVIR                   | oxoglutarate dehydrogenase (lipoamide) [Mus musculus]                                               | 1011.6401 | 33.46  | 1.257496306 |
| 9790017  | LNWLSVDFNWNK                | telomerase binding protein, p23 [Mus musculus]                                                      | 1535.7654 | 62.81  | 0.429834491 |
| 33859811 | LPAKPEVSSDEDVQYR            | hydroxyacyl-Coenzyme A dehydrogenase/3-ketoacyl-Coenzyme A thiolase/enoyl-Coenzyme A hydratase (tri | 1832.8816 | 41.25  | 0           |
| 33859506 | LPCVEDYLSAILNR              | albumin 1 [Mus musculus]                                                                            | 1605.8344 | 106.72 | 0.092958467 |
| 46195798 | LPDVYGVFOFK                 | dolichyl-di-phosphooligosaccharide-protein glycotransferase [Mus musculus]                          | 1312.6896 | 66.46  | 0.445431036 |
| 29789080 | LPEAAFLAR                   | coatamer protein complex, subunit beta 2 (beta prime) [Mus musculus]                                | 987.5592  | 25.91  | 0.394292785 |
| 28916703 | LPFPIDDK                    | peroxiredoxin 5 related sequence 1 protein [Mus musculus]                                           | 1057.5953 | 67     | 0           |
| 6671549  | LPFPIDDK                    | peroxiredoxin 6 [Mus musculus]                                                                      | 1057.5953 | 67     | 0           |
| 51873060 | LPLQDVYK                    | eukaryotic translation elongation factor 1 alpha 1 [Mus musculus]                                   | 975.5473  | 54.49  | 0.533096999 |
| 7305075  | LPNFGFVVDSEPVQK             | ras-GTPase-activating protein SH3-domain binding protein [Mus musculus]                             | 1937.9619 | 48.63  | 0           |
| 19527174 | LPPNTNDEVEDDEPTGNK          | splicing factor 3b, subunit 3 [Mus musculus]                                                        | 1854.8469 | 55.65  | 0.572579442 |
| 63746482 | LPQLPITNFSR                 | PREDICTED: filamin, alpha [Mus musculus]                                                            | 1285.7277 | 69.73  | 0           |
| 42741690 | LPQPPEGQCYSN                | ubiquitin-conjugating enzyme E2 variant 1 [Mus musculus]                                            | 1332.5979 | 25.79  | 0           |
| 8393866  | LPSDVVTSVR                  | ornithine aminotransferase [Mus musculus]                                                           | 1072.5964 | 25.52  | 0           |
| 63738313 | LPSGSGPASPTTGSVDIR          | PREDICTED: similar to AHNAK [Mus musculus]                                                          | 1769.9034 | 107.8  | 0.260535214 |
| 41322904 | LPVDVAYQR                   | plectin 1 isoform 1 [Mus musculus]                                                                  | 1060.578  | 47.03  | 1.267543798 |
| 27370126 | LPYTEEEQLSR                 | carboxylesterase 5 [Mus musculus]                                                                   | 1493.7148 | 75.94  | 0.365122611 |
| 13624315 | LQAEIALK                    | keratin complex 2, basic, gene 8 [Mus musculus]                                                     | 1014.5787 | 48.55  | 0           |
| 27532959 | LQAGTVFVNNTYNK              | aldehyde dehydrogenase 1 family, member L1 [Mus musculus]                                           | 1454.7526 | 38.06  | 0           |
| 31982755 | LQDEIQNKKEEMAR              | vimentin [Mus musculus]                                                                             | 1734.8143 | 40.03  | 0           |
| 7305295  | LQDFASTIEMEEGK              | myosin, heavy polypeptide 11, smooth muscle [Mus musculus]                                          | 1712.7963 | 23.18  | 0           |
| 34328286 | LQDPFVSVR                   | succinate dehydrogenase lp subunit [Mus musculus]                                                   | 1124.574  | 32.81  | 0.324225405 |
| 10946972 | LQEAYYIFQELADK              | epsilon subunit of coatamer protein complex [Mus musculus]                                          | 1730.8584 | 44.23  | 0           |
| 33147082 | LQEDPNYSQQR                 | HLA-B-associated transcript 3 [Mus musculus]                                                        | 1346.6392 | 41.85  | 0.504104811 |
| 33563250 | LQEEIQLR                    | desmin [Mus musculus]                                                                               | 1028.5725 | 55.15  | 0           |
| 31982755 | LQEEMLQR                    | vimentin [Mus musculus]                                                                             | 1046.532  | 38.61  | 0           |
| 6678573  | LQEEENVITPR                 | villin 1 [Mus musculus]                                                                             | 1326.7019 | 69.27  | 0.42554184  |
| 50355692 | LQEKEDLQELNDR               | lamin A isoform A [Mus musculus]                                                                    | 1629.8069 | 71.99  | 0.769334249 |
| 31791057 | LQELESLIANLGTGDDMVTDAQAFEDR | laminin, gamma 1 [Mus musculus]                                                                     | 2880.373  | 22.09  | 0           |
| 8393988  | LQEQLGNDVVEK                | phosphomannomutase 2 [Mus musculus]                                                                 | 1371.71   | 66.7   | 0           |
| 34594657 | LQGPQTSAEVYR                | glycerol-3-phosphate dehydrogenase 1-like [Mus musculus]                                            | 1348.6876 | 40.56  | 0           |
| 39930335 | LQQQLEQGGDTAAEK             | ATP-binding cassette, sub-family F (GCN20), member 1 [Mus musculus]                                 | 1602.7659 | 85.34  | 0           |
| 10946940 | LQIWDTAGQESFR               | RAB2, member RAS oncogene family [Mus musculus]                                                     | 1550.7699 | 86.13  | 0           |
| 20137006 | LQLQEQLQAETELCAEAELR        | myosin, heavy polypeptide 9, non-muscle [Mus musculus]                                              | 2445.1978 | 22.46  | 0           |
| 63664138 | LQLTDEQLQNR                 | PREDICTED: hypothetical protein LOC219189 [Mus musculus]                                            | 1357.7072 | 25.72  | 0           |
| 41322904 | LQMEAGLCEEQLNQDALLQSDIR     | plectin 1 isoform 1 [Mus musculus]                                                                  | 2688.291  | 80.89  | 0           |
| 21450625 | LQMEAPHIIVGTGPR             | eukaryotic translation initiation factor 4A1 [Mus musculus]                                         | 1618.8701 | 23.13  | 0           |
| 7305295  | LQNEVESVTGMLNEAEGK          | myosin, heavy polypeptide 11, smooth muscle [Mus musculus]                                          | 1947.9365 | 119.79 | 0           |
| 7305295  | LQNEVESVTGMLNEAEGK          | myosin, heavy polypeptide 11, smooth muscle [Mus musculus]                                          | 1963.9344 | 72.7   | 0.384481708 |
| 12963569 | LQNLDALNTLTVLSVQSNR         | protein phosphatase-1 regulatory subunit 7 [Mus musculus]                                           | 2099.1421 | 52.44  | 0.844401125 |
| 38089265 | LQNTGVADGYPVR               | PREDICTED: palladin [Mus musculus]                                                                  | 1389.7137 | 52.82  | 0           |
| 41322904 | LQNVQIALDYLR                | plectin 1 isoform 1 [Mus musculus]                                                                  | 1445.818  | 50.29  | 0.479214045 |
| 20137006 | LQQELDDLVDLDHQR             | myosin, heavy polypeptide 9, non-muscle [Mus musculus]                                              | 1949.9948 | 74.7   | 0.551832237 |
| 7305295  | LQQELDDLVDLDNQR             | myosin, heavy polypeptide 11, smooth muscle [Mus musculus]                                          | 1912.9713 | 129.96 | 0.109469724 |
| 19527026 | LQQLPADFGFR                 | hypothetical protein LOC98238 [Mus musculus]                                                        | 1144.6115 | 51.37  | 0.664409155 |
| 13195624 | LQSWLYASR                   | NADH dehydrogenase (ubiquinone) 1 alpha subcomplex 10 [Mus musculus]                                | 1123.5862 | 25.71  | 0.296042706 |
| 10048462 | LQTQPPSLSGQPPMYSGLTDCFR     | carnitine/acylcarnitine translocase [Mus musculus]                                                  | 2523.2146 | 33.07  | 0.280043285 |
| 63746482 | LQVEPAVDTSVGVCYQGPVGGGVFR   | PREDICTED: filamin, alpha [Mus musculus]                                                            | 2706.3206 | 132.26 | 0.069288679 |
| 31980942 | LQVSQQEDITK                 | Inositol (myo)-1(or 4)-monophosphatase 1 [Mus musculus]                                             | 1288.6729 | 68.35  | 0.411791118 |
| 19525729 | LQYAVISAWR                  | crystallin, lamda 1 [Mus musculus]                                                                  | 1335.7106 | 27.34  | 1.10465967  |

|          |                           |               |                                                                                                   |           |        |             |
|----------|---------------------------|---------------|---------------------------------------------------------------------------------------------------|-----------|--------|-------------|
| 41322904 | LRAETEQQEQQR              |               | plectin 1 isoform 1 [Mus musculus]                                                                | 1444.7418 | 26.06  | 0           |
| 31791057 | LSAEDLVLEGAGLR            |               | laminin, gamma 1 [Mus musculus]                                                                   | 1442.7872 | 95.5   | 0.155076703 |
| 63476037 | LSDAGITPLFLTSQEDR         |               | PREDICTED: procollagen, type VI, alpha 3 [Mus musculus]                                           | 1862.9489 | 74.62  | 0           |
| 63489759 | LSDDNTIGQEIQQR            |               | PREDICTED: spectrin alpha 2 [Mus musculus]                                                        | 1745.8324 | 83.76  | 0.259979127 |
| 6754206  | LSDEILIDLTR               |               | hexokinase 1 [Mus musculus]                                                                       | 1400.8037 | 51.43  | 0           |
| 6755156  | LSDFNIIDTLGVGGFGR         |               | protein kinase, cGMP-dependent, type I beta isoform [Mus musculus]                                | 1780.9241 | 27.65  | 0           |
| 6671666  | LSDLLAPISEIQEVITFR        |               | CAP, adenylate cyclase-associated protein 1 [Mus musculus]                                        | 2172.1902 | 90.11  | 0.831420037 |
| 34368584 | LSEASGGLAENGER            |               | erythropoietin 4 immediate early response [Mus musculus]                                          | 1389.6635 | 23.09  | 1.130436397 |
| 31981828 | LSFLYLITGNLEK             |               | coatamer protein complex subunit alpha [Mus musculus]                                             | 1510.851  | 58.12  | 0.327142704 |
| 21450291 | LSFSYGR                   |               | aldolase 2, B isoform [Mus musculus]                                                              | 829.4251  | 28.3   | 0.302649393 |
| 23956150 | LSFYETGEIPR               |               | nucleolar protein 5A [Mus musculus]                                                               | 1311.6487 | 23.36  | 0           |
| 12963539 | LSGAQADLHIGEGDSIR         |               | ETHE1 protein [Mus musculus]                                                                      | 1738.8726 | 101.51 | 0           |
| 7948997  | LSGGIDFNQPLVITR           |               | PDZ and LIM domain 3 [Mus musculus]                                                               | 1629.8937 | 63.68  | 0.384526578 |
| 11230802 | LSGSNPYTTVTPQIINSK        |               | actinin alpha 4 [Mus musculus]                                                                    | 1919.9758 | 45.78  | 0.380629525 |
| 27229048 | LSGVSVDADFFPFR            |               | 5-aminoimidazole-4-carboxamide ribonucleotide formyltransferase/IMP cyclohydrolase [Mus musculus] | 1615.8167 | 99.55  | 0.499380333 |
| 6671549  | LSILYPATTGR               |               | peroxiredoxin 6 [Mus musculus]                                                                    | 1191.6743 | 52.3   | 0.438559876 |
| 6679166  | LSLLEELTLAENQLLR          |               | osteoglycin [Mus musculus]                                                                        | 1855.0582 | 56.49  | 0.175294964 |
| 13384736 | LSLSNAISTVPLTQLR          |               | dynein, cytoplasmic, heavy chain 1 [Mus musculus]                                                 | 1826.0759 | 30.66  | 0.260545418 |
| 13507622 | LSNTSPEFQEMSLER           |               | SAC1 (suppressor of actin mutations 1, homolog)-like [Mus musculus]                               | 1880.897  | 55.21  | 0           |
| 6755787  | LSPPYSSPQEFQADVGR         |               | tripartite motif protein 28 [Mus musculus]                                                        | 1877.9048 | 52.32  | 0.647120887 |
| 29336026 | LSQLEEELEEQNNSSELLK       |               | nonmuscle myosin heavy chain [Mus musculus]                                                       | 2274.0879 | 42.74  | 0           |
| 6755967  | LSQNNFALGYK               |               | voltage-dependent anion channel 3 [Mus musculus]                                                  | 1254.6442 | 61.83  | 0.386013798 |
| 12963539 | LSQQSASGAPVLLR            |               | ETHE1 protein [Mus musculus]                                                                      | 1426.8011 | 29.45  | 0.920239512 |
| 33859506 | LSQTFPNADFAEITK           |               | albumin 1 [Mus musculus]                                                                          | 1681.842  | 75.88  | 0           |
| 6754556  | LSSEMNTSTVNSAR            |               | lamin B1 [Mus musculus]                                                                           | 1496.7036 | 43.91  | 0           |
| 6754556  | LSSEMNTSTVNSAR            | Oxidation (M) | lamin B1 [Mus musculus]                                                                           | 1512.6891 | 33.42  | 0.579315888 |
| 34996495 | LSGGYYDFSVR               |               | ribophorin II [Mus musculus]                                                                      | 1293.6151 | 58.22  | 1.269029665 |
| 37620153 | LSSMAMISGLSGR             |               | myosin, light polypeptide kinase telokin isoform [Mus musculus]                                   | 1309.6631 | 24.49  | 0           |
| 136429   | LSSPATLNSR                |               | Trypsin precursor                                                                                 | 1045.5673 | 45.38  | 0           |
| 7305085  | LSTDHIPILYR               |               | glutamine fructose-6-phosphate transaminase 1 [Mus musculus]                                      | 1327.7366 | 30.75  | 0.714453471 |
| 6680606  | LSVEADINGLR               |               | keratin complex 1, acidic, gene 19 [Mus musculus]                                                 | 1186.6409 | 33.72  | 0           |
| 547751   | LSVEADINGLR               |               | Keratin, type I cytoskeletal 17 (Cytokeratin 17) (K17) (CK 17) (39.1)                             | 1186.6409 | 33.72  | 0           |
| 6755078  | LSVEIWDWDR                |               | protein kinase C, alpha [Mus musculus]                                                            | 1318.6488 | 22.15  | 0           |
| 22122387 | LSVGLEDEQDLDLDR           |               | cystathionase [Mus musculus]                                                                      | 1958.9606 | 80.7   | 0           |
| 7305007  | LSYQNDPSFGSYAVPIR         |               | desmocollin 2 [Mus musculus]                                                                      | 1913.9448 | 35.56  | 0           |
| 51491845 | LTDQLPLIIVCCR             |               | clathrin, heavy polypeptide (Hc) [Mus musculus]                                                   | 1498.829  | 63.96  | 0.435803413 |
| 6679012  | LTDQVMQNPQVLAALQER        |               | nucleosome assembly protein 1-like 4 [Mus musculus]                                               | 2054.0696 | 57.64  | 0           |
| 20137006 | LTEMETMQSQLMAEK           |               | myosin, heavy polypeptide 9, non-muscle [Mus musculus]                                            | 1769.8131 | 48.98  | 0           |
| 31981983 | LTEPQLGLGSQR              |               | stromal interaction molecule 1 [Mus musculus]                                                     | 1298.7043 | 51.45  | 0           |
| 6755863  | LTESPCALVASQYGWGSGNMR     |               | tumor rejection antigen gp96 [Mus musculus]                                                       | 2299.0498 | 46.27  | 0.37457224  |
| 29789191 | LTESVDVLMPNVGEIVGSSMR     |               | asparaginyl-tRNA synthetase [Mus musculus]                                                        | 2203.1147 | 37.94  | 0.662105731 |
| 7304887  | LTDFEYR                   |               | annexin A3 [Mus musculus]                                                                         | 943.4609  | 47.73  | 0.207268257 |
| 6755963  | LTDFSSFPNTGK              |               | voltage-dependent anion channel 1 [Mus musculus]                                                  | 1400.6637 | 82.03  | 0.335269597 |
| 6755965  | LTFTTTFSPNTGK             |               | voltage-dependent anion channel 2 [Mus musculus]                                                  | 1428.6953 | 80.23  | 0.415563129 |
| 18079339 | LTGSLSGWTSPK              |               | aconitase 2, mitochondrial [Mus musculus]                                                         | 1233.6399 | 58.35  | 0.224732977 |
| 50053824 | LTLAQEDLISNR              |               | early endosome antigen 1 [Mus musculus]                                                           | 1372.7373 | 25.52  | 0.188985832 |
| 6755967  | LTLDTIFVPNTGK             |               | voltage-dependent anion channel 3 [Mus musculus]                                                  | 1418.7845 | 30.06  | 0           |
| 63476037 | LTLGGPTPNTGAALFVLR        |               | PREDICTED: procollagen, type VI, alpha 3 [Mus musculus]                                           | 2040.1478 | 74.11  | 0.107530271 |
| 6677813  | LTPEEEIILNK               |               | ribosomal protein S8 [Mus musculus]                                                               | 1314.675  | 28.66  | 0           |
| 31981722 | LTPEEIER                  |               | heat shock 70kD protein 5 (glucose-regulated protein) [Mus musculus]                              | 986.5164  | 26.55  | 0.379339651 |
| 63501125 | LTQQAGDLTVPAGGQR          |               | PREDICTED: ADP-ribosylation factor interacting protein 1 [Mus musculus]                           | 1611.851  | 52.11  | 0.56638683  |
| 46575903 | LTSLVPFVDAFQLER           |               | eukaryotic translation initiation factor 3, subunit 10 (theta) [Mus musculus]                     | 1734.9476 | 54.28  | 0.357749428 |
| 22165384 | LTTPTYGDLNHLVSATMSGVTTCLR |               | tubulin, beta, 2 [Mus musculus]                                                                   | 2651.3181 | 31.54  | 0.325871318 |
| 33859488 | LTTPTYGDLNHLVSATMSGVTTCLR |               | tubulin, beta 2 [Mus musculus]                                                                    | 2651.3181 | 31.54  | 0.325871318 |
| 31981939 | LTTPTYGDLNHLVSATMSGVTTCLR |               | tubulin, beta 4 [Mus musculus]                                                                    | 2651.3181 | 31.54  | 0.325871318 |
| 7106439  | LTTPTYGDLNHLVSATMSGVTTCLR |               | tubulin, beta 5 [Mus musculus]                                                                    | 2651.3181 | 31.54  | 0.325871318 |
| 21746161 | LTTPTYGDLNHLVSATMSGVTTCLR |               | tubulin, beta [Mus musculus]                                                                      | 2651.3181 | 31.54  | 0.325871318 |
| 38083795 | LTVEDPVTVEYTR             |               | PREDICTED: proteasome (prosome, macropain) subunit, alpha type, 8 [Mus musculus]                  | 1634.8639 | 37.2   | 0.368268895 |
| 51556274 | LVAGEMGQNEPDQGGQR         |               | hydroxyacyl-Coenzyme A dehydrogenase type II [Mus musculus]                                       | 1785.8218 | 70.59  | 0.591199993 |
| 13385472 | LVAIVDVIDQNR              |               | ribosomal protein L14 [Mus musculus]                                                              | 1354.7679 | 56.61  | 0.614348995 |



|          |                         |               |                                                                                                         |           |        |             |
|----------|-------------------------|---------------|---------------------------------------------------------------------------------------------------------|-----------|--------|-------------|
| 30023842 | MDELQLFR                |               | valosin containing protein [Mus musculus]                                                               | 1051.528  | 44.74  | 0.571649445 |
| 40068507 | MDENQFVAVTSTNAAK        |               | collapsin response mediator protein 1 [Mus musculus]                                                    | 1725.8097 | 93.03  | 0           |
| 40254595 | MDENQFVAVTSTNAAK        |               | dihydropyrimidinase-like 2 [Mus musculus]                                                               | 1725.8097 | 93.03  | 0           |
| 6681219  | MDENQFVAVTSTNAAK        |               | dihydropyrimidinase-like 3 [Mus musculus]                                                               | 1725.8097 | 93.03  | 0           |
| 42415475 | MDSTANEVEAVK            | Oxidation (M) | prolyl 4-hydroxylase, beta polypeptide [Mus musculus]                                                   | 1309.595  | 35.93  | 0.596109037 |
| 33859686 | MEFGTAGLR               |               | phosphoglucomutase 1 [Mus musculus]                                                                     | 981.4965  | 26.04  | 0.785977678 |
| 63506278 | MELRSGSVGTGQRMDR        | Oxidation (M) | PREDICTED: hypothetical protein XP_487709 [Mus musculus]                                                | 1795.826  | 22.52  | 0           |
| 7305505  | MEPDPAPSPSTTVEAANGAEQAR |               | smoothelin [Mus musculus]                                                                               | 2368.0745 | 82.29  | 0.106296432 |
| 64427157 | MEQFTAQNEEEK            |               | PREDICTED: synaptodin 2 [Mus musculus]                                                                  | 1483.6381 | 53.49  | 0.346531307 |
| 64427157 | MEQFTAQNEEEK            | Oxidation (M) | PREDICTED: synaptodin 2 [Mus musculus]                                                                  | 1499.6301 | 50.09  | 0.130094834 |
| 10946972 | MFAEYLASENQR            |               | epsilon subunit of coatomer protein complex [Mus musculus]                                              | 1458.6741 | 39.24  | 6.458401992 |
| 6671602  | MFIGLSWDTTK             |               | heterogeneous nuclear ribonucleoprotein D [Mus musculus]                                                | 1355.6614 | 77.54  | 1.459814188 |
| 47578123 | MFTQQQPQLAR             |               | potassium channel tetramerisation domain containing 12 [Mus musculus]                                   | 1476.7236 | 36.48  | 0           |
| 21450625 | MFVLDEADEMLSR           |               | eukaryotic translation initiation factor 4A1 [Mus musculus]                                             | 1555.7192 | 80.62  | 0.814438218 |
| 23956214 | MGGGGTMMNGDPYGGGGQK     |               | splicing factor proline/glutamine rich (polypyrimidine tract binding protein associated) [Mus musculus] | 1801.7329 | 65.62  | 0           |
| 33859811 | MGLVDQLVEPLGPGIK        |               | hydroxyacyl-Coenzyme A dehydrogenase/3-ketoacyl-Coenzyme A thiolase/enoyl-Coenzyme A hydratase (tri     | 1665.9149 | 26.07  | 0.466399743 |
| 6754508  | MGPSGGEGVEPER           |               | LIM and SH3 protein 1 [Mus musculus]                                                                    | 1301.5853 | 27.83  | 0.961257619 |
| 13384720 | MGSQVLIPIYR             |               | NADH dehydrogenase (ubiquinone) 1 alpha subcomplex, 9 [Mus musculus]                                    | 1163.6162 | 25.69  | 0           |
| 31982186 | MIAEAIPELK              |               | malate dehydrogenase 2, NAD (mitochondrial) [Mus musculus]                                              | 1114.5984 | 22.1   | 0.435773254 |
| 31980685 | MIEQDDFDINTR            |               | glucosamine [Mus musculus]                                                                              | 1496.6688 | 50.06  | 0.671835499 |
| 21704206 | MIPAVVDGEFFPR           |               | carboxylesterase 2 [Mus musculus]                                                                       | 1477.7544 | 38.48  | 0.513351597 |
| 29336026 | MIQALELDPNLRY           |               | nonmuscle myosin heavy chain [Mus musculus]                                                             | 1575.8179 | 37.27  | 0.506221475 |
| 6754206  | MISGMYLGEIVR            |               | hexokinase 1 [Mus musculus]                                                                             | 1368.7029 | 48.43  | 0           |
| 7305143  | MISGMYLGEIVR            |               | hexokinase 2 [Mus musculus]                                                                             | 1368.7029 | 48.43  | 0           |
| 6680716  | MLAEDELRL               |               | ADP-ribosylation factor 1 [Mus musculus]                                                                | 976.4776  | 48.96  | 0.389661265 |
| 6681157  | MLDMGFEPQIR             |               | DEAD (Asp-Glu-Ala-Asp) box polypeptide 5 [Mus musculus]                                                 | 1336.6411 | 58.11  | 0           |
| 40068493 | MLDMGFEPQIR             |               | DEAD box polypeptide 17 isoform 1 [Mus musculus]                                                        | 1336.6411 | 58.11  | 0           |
| 6753620  | MLDMGFEPQIR             |               | DEAD/H (Asp-Glu-Ala-Asp/His) box polypeptide 3, X-linked [Mus musculus]                                 | 1336.6411 | 58.11  | 0           |
| 63621901 | MLDMGFEPQIR             |               | PREDICTED: similar to ddx5 [Mus musculus]                                                               | 1336.6411 | 58.11  | 0           |
| 7305505  | MLDQTTNFEER             |               | smoothelin [Mus musculus]                                                                               | 1383.6222 | 63.94  | 0.792921294 |
| 6679891  | MLDYLQGSGETPQTDIR       |               | alpha glucosidase 2 alpha neutral subunit [Mus musculus]                                                | 1923.9127 | 78.1   | 0.450500628 |
| 6679891  | MLDYLQGSGETPQTDIR       | Oxidation (M) | alpha glucosidase 2 alpha neutral subunit [Mus musculus]                                                | 1939.9077 | 34.05  | 0           |
| 38372907 | MLEQLDMR                |               | DEAD (Asp-Glu-Ala-Asp) box polypeptide 39 [Mus musculus]                                                | 1035.5018 | 31.23  | 3.061514143 |
| 9790069  | MLEQLDMR                |               | HLA-B-associated transcript 1A [Mus musculus]                                                           | 1035.5018 | 31.23  | 3.061514143 |
| 10092608 | MLLADQGGQSWK            |               | glutathione S-transferase, pi 1 [Mus musculus]                                                          | 1276.6263 | 47.84  | 0           |
| 6754084  | MLLEYTDSSEDEK           |               | glutathione S-transferase, mu 1 [Mus musculus]                                                          | 1593.7045 | 62.13  | 0           |
| 56119103 | MLLFTEVTR               |               | guanosine diphosphate (GDP) dissociation inhibitor 3 [Mus musculus]                                     | 1109.6022 | 29.17  | 0           |
| 63562017 | MLLFTEVTR               |               | PREDICTED: similar to GDP dissociation inhibitor 2 [Mus musculus]                                       | 1109.6022 | 29.17  | 0           |
| 6678483  | MLQTSVVLVSGLR           |               | ubiquitin-activating enzyme E1, Chr X [Mus musculus]                                                    | 1390.7725 | 40.6   | 0.963761205 |
| 9910550  | MLSLDFLDVDR             |               | Sec11-like 1 [Mus musculus]                                                                             | 1323.667  | 29.88  | 0           |
| 30348966 | MLTAQDMSYDEAR           |               | spectrin beta 2 isoform 1 [Mus musculus]                                                                | 1530.6624 | 38.18  | 0.972232227 |
| 7106421  | MLTAQDMSYDEAR           |               | spectrin beta 2 isoform 2 [Mus musculus]                                                                | 1530.6624 | 38.18  | 0.972232227 |
| 31982290 | MLYDMENPPADDYFGR        |               | LIM domain containing preferred translocation partner in lipoma [Mus musculus]                          | 1933.8171 | 57.58  | 0           |
| 31982290 | MLYDMENPPADDYFGR        | Oxidation (M) | LIM domain containing preferred translocation partner in lipoma [Mus musculus]                          | 1949.8098 | 43.35  | 0           |
| 31981273 | MMEVAADVQR              |               | CNDP dipeptidase 2 (metallopeptidase M20 family) [Mus musculus]                                         | 1220.5781 | 44.86  | 0           |
| 6754036  | MNLGVGAYR               |               | glutamate oxaloacetate transaminase 2, mitochondrial [Mus musculus]                                     | 980.5021  | 39.34  | 0           |
| 19923070 | MPIIPFLL                |               | glycoprotein, synaptic 2 [Mus musculus]                                                                 | 943.5571  | 24.93  | 0.539390083 |
| 29244560 | MPLSALYGSLSFLQQLR       |               | hypothetical protein LOC331063 [Mus musculus]                                                           | 1924.0336 | 39.08  | 0           |
| 6679465  | MPPYDEETQAIIDAQAQEAR    |               | protein kinase C substrate 80K-H [Mus musculus]                                                         | 2147.9941 | 111.88 | 0.322751284 |
| 6678359  | MPTPPSYK                |               | transketolase [Mus musculus]                                                                            | 920.455   | 44.06  | 0.394438986 |
| 6678359  | MPTPPSYK                | Oxidation (M) | transketolase [Mus musculus]                                                                            | 936.4473  | 35.76  | 0.366308988 |
| 7549795  | MQELQEAQNAR             |               | tight junction protein 2 [Mus musculus]                                                                 | 1317.6223 | 41.52  | 1.569241448 |
| 6678726  | MQEYVNFNAINSEIR         |               | leukotriene A4 hydrolase [Mus musculus]                                                                 | 1941.9187 | 53.81  | 0.378762238 |
| 6754084  | MQLIMLCYNPDFEK          |               | glutathione S-transferase, mu 1 [Mus musculus]                                                          | 1744.8232 | 31.78  | 0           |
| 33859811 | MQLLEIITTDK             |               | hydroxyacyl-Coenzyme A dehydrogenase/3-ketoacyl-Coenzyme A thiolase/enoyl-Coenzyme A hydratase (tri     | 1304.7051 | 53.53  | 0           |
| 21312550 | MQLQGGELQAPGYQR         |               | hypothetical protein LOC71998 [Mus musculus]                                                            | 1719.8551 | 24.35  | 0           |
| 8394269  | MQQFDLLFR               |               | ST6 (alpha-N-acetyl-neuraminyl-2,3-beta-galactosyl-1,3)-N-acetylgalactosaminide alpha-2,6-sialyltra     | 1199.552  | 64.87  | 0           |
| 20137006 | MQQNIQEELEEQQEESAR      |               | myosin, heavy polypeptide 9, non-muscle [Mus musculus]                                                  | 2333.051  | 87.01  | 0.485562628 |
| 50355692 | MQQQLDEYQELLDIK         |               | lamin A isoform A [Mus musculus]                                                                        | 1893.9235 | 84.17  | 0           |
| 6678093  | MQQVEASLPETLR           |               | serine (or cysteine) proteinase inhibitor, clade A, member 3N [Mus musculus]                            | 1629.8198 | 33.43  | 0           |



|          |                        |                  |                                                                                                     |           |       |             |
|----------|------------------------|------------------|-----------------------------------------------------------------------------------------------------|-----------|-------|-------------|
| 58037465 | NFGIWLRL               |                  | Ribosomal protein L18A [Mus musculus]                                                               | 905.5065  | 31.56 | 0.43257955  |
| 7949051  | NFILDQTNVSAQAQR        |                  | heterogenous nuclear ribonucleoprotein U [Mus musculus]                                             | 1647.8485 | 99.3  | 0.417831407 |
| 20137006 | NFINNPLAQADWAAK        |                  | myosin, heavy polypeptide 9, non-muscle [Mus musculus]                                              | 1672.8438 | 76.38 | 0.323435181 |
| 19705578 | NFITQGGPYENR           |                  | ATPase, H+ transporting, V1 subunit B, isoform 2 [Mus musculus]                                     | 1338.6489 | 47.85 | 0           |
| 51556274 | NFLASQVFPFPSR          |                  | hydroxyacyl-Coenzyme A dehydrogenase type II [Mus musculus]                                         | 1362.7174 | 27.3  | 0.294904614 |
| 18034769 | NFLINYNYR              |                  | sorting nexin 5 [Mus musculus]                                                                      | 1216.6143 | 24.42 | 0.460896711 |
| 13195638 | NFLSTPQFLYR            |                  | Der1-like domain family, member 1 [Mus musculus]                                                    | 1385.7294 | 22.48 | 0.365502423 |
| 33859490 | NFLTEDSADLDSIEAVANEVLK |                  | laminin B1 subunit 1 [Mus musculus]                                                                 | 2393.1763 | 50.33 | 0           |
| 7305295  | NFMNSPMAQADWVAK        | 2 Oxidation (M)  | myosin, heavy polypeptide 11, smooth muscle [Mus musculus]                                          | 1709.7754 | 71.7  | 0           |
| 7305295  | NFMNSPMAQADWVAK        | Oxidation (M)    | myosin, heavy polypeptide 11, smooth muscle [Mus musculus]                                          | 1741.7609 | 31.22 | 0           |
| 7305295  | NFMNSPMAQADWVAK        |                  | myosin, heavy polypeptide 11, smooth muscle [Mus musculus]                                          | 1725.7698 | 66.96 | 0           |
| 46849705 | NFVINFK                |                  | lectin, galactose binding, soluble 4 [Mus musculus]                                                 | 881.4863  | 41.44 | 0.294318346 |
| 22203747 | NFVINVVNR              |                  | procollagen, type VI, alpha 2 [Mus musculus]                                                        | 1074.604  | 46.13 | 0           |
| 6681157  | NFYQEHPDLAR            |                  | DEAD (Asp-Glu-Ala-Asp) box polypeptide 5 [Mus musculus]                                             | 1389.6544 | 32.82 | 0.52577936  |
| 63621901 | NFYQEHPDLAR            |                  | PREDICTED: similar to ddx5 [Mus musculus]                                                           | 1389.6544 | 32.82 | 0.52577936  |
| 51771420 | NGEDLGVAFR             |                  | PREDICTED: hypothetical protein LOC68693 [Mus musculus]                                             | 1077.5387 | 35.96 | 0           |
| 30794140 | NGEQQAVPALR            |                  | protein disulfide isomerase-associated 5 [Mus musculus]                                             | 1182.621  | 38.24 | 0.850425398 |
| 30794140 | NGEQQAVPALR            | Deamidation (NQ) | protein disulfide isomerase-associated 5 [Mus musculus]                                             | 1183.6162 | 34.09 | 0           |
| 63487095 | NGNGGPGPYVGGAGTATLPR   | Deamidation (NQ) | PREDICTED: catenin src [Mus musculus]                                                               | 1884.9288 | 93.44 | 0.542951192 |
| 46358078 | NGQEETVGVSSSTQLIR      |                  | response to metastatic cancers 1 [Mus musculus]                                                     | 1717.8704 | 65.84 | 0.835989758 |
| 31981327 | NGYELSPTAAANFTR        |                  | proteasome (prosome, macropain) subunit, beta type 2 [Mus musculus]                                 | 1611.7813 | 36.81 | 0           |
| 20806532 | NGYGFINR               |                  | cold shock domain protein A short isoform [Mus musculus]                                            | 940.4684  | 40.86 | 1.156344124 |
| 6756033  | NGYGFINR               |                  | nuclease sensitive element binding protein 1 [Mus musculus]                                         | 940.4684  | 40.86 | 1.156344124 |
| 63562136 | NGYGFINR               |                  | PREDICTED: hypothetical protein LOC78552 [Mus musculus]                                             | 940.4684  | 40.86 | 1.156344124 |
| 20806532 | NGYGFINR               | Deamidation (NQ) | cold shock domain protein A short isoform [Mus musculus]                                            | 941.4547  | 40.25 | 0           |
| 6756033  | NGYGFINR               | Deamidation (NQ) | nuclease sensitive element binding protein 1 [Mus musculus]                                         | 941.4547  | 40.25 | 0           |
| 63562136 | NGYGFINR               | Deamidation (NQ) | PREDICTED: hypothetical protein LOC78552 [Mus musculus]                                             | 941.4547  | 40.25 | 0           |
| 31543689 | NGYGFVEFEDSR           |                  | arginine/serine-rich splicing factor 6 [Mus musculus]                                               | 1419.6261 | 27.54 | 0.884945055 |
| 18700024 | NIANPTAMLLSATNMLR      |                  | isocitrate dehydrogenase 3, beta subunit [Mus musculus]                                             | 1830.9662 | 36.25 | 0.88946275  |
| 6680722  | NICFTWVDVGGQDK         |                  | ADP-ribosylation factor 5 [Mus musculus]                                                            | 1581.7448 | 55.84 | 0           |
| 33238874 | NIFDFNAIK              |                  | phosphoglucomutase 5 [Mus musculus]                                                                 | 1081.5673 | 37.69 | 0.389672876 |
| 6753556  | NIFSFLYLR              |                  | cathepsin D [Mus musculus]                                                                          | 1173.6107 | 34.02 | 0.345528925 |
| 31560611 | NIIGLQMGTKN            | Oxidation (M)    | calponin 1 [Mus musculus]                                                                           | 1204.6263 | 34.43 | 0.296865714 |
| 58037546 | NILGGTVFR              |                  | isocitrate dehydrogenase 1 (NADP+), soluble [Mus musculus]                                          | 976.5551  | 29.06 | 0.356665008 |
| 27370516 | NILGGTVFR              |                  | isocitrate dehydrogenase 2 (NADP+), mitochondrial [Mus musculus]                                    | 976.5551  | 29.06 | 0.356665008 |
| 15147224 | NILLTNEQLENAR          |                  | sideroflexin 1 [Mus musculus]                                                                       | 1527.816  | 45.53 | 0           |
| 31542333 | NINADEAAAMGAVYQAAALS   |                  | hypoxia up-regulated 1 [Mus musculus]                                                               | 2079.01   | 58.66 | 0           |
| 31543605 | NIQVDSPLYDISR          |                  | ribophorin I [Mus musculus]                                                                         | 1406.6926 | 70.89 | 0.432436777 |
| 33563250 | NISEAEWYK              |                  | desmin [Mus musculus]                                                                               | 1268.574  | 64.69 | 0.075262996 |
| 34996495 | NIVEEIEDLVAR           |                  | ribophorin II [Mus musculus]                                                                        | 1399.7443 | 55.41 | 0.492781059 |
| 23956222 | NIVLSGGSTMFR           |                  | ARP3 actin-related protein 3 homolog [Mus musculus]                                                 | 1281.6616 | 55.92 | 0.678435277 |
| 21704100 | NIVVVEGVR              |                  | hydroxyacyl-Coenzyme A dehydrogenase/3-ketoacyl-Coenzyme A thiolase/enoyl-Coenzyme A hydratase (tri | 984.5839  | 46.45 | 0.338340994 |
| 63664138 | NLADQGIINYPYSTR        |                  | PREDICTED: hypothetical protein LOC219189 [Mus musculus]                                            | 1724.8617 | 37.62 | 0           |
| 45598381 | NLAPTWEELSK            |                  | thioredoxin domain containing 5 [Mus musculus]                                                      | 1287.6488 | 28.74 | 0           |
| 6755002  | NLATAYDNFVELVANLK      |                  | programmed cell death 6 interacting protein [Mus musculus]                                          | 1894.9833 | 26.15 | 0.366242884 |
| 34740335 | NLDIERPTYTNLNR         |                  | tubulin, alpha 2 [Mus musculus]                                                                     | 1718.8879 | 48.49 | 0.494986193 |
| 6678467  | NLDIERPTYTNLNR         |                  | tubulin, alpha 4 [Mus musculus]                                                                     | 1718.8879 | 48.49 | 0.494986193 |
| 6678469  | NLDIERPTYTNLNR         |                  | tubulin, alpha 6 [Mus musculus]                                                                     | 1718.8879 | 48.49 | 0.494986193 |
| 22550094 | NLDQEQLSQVLDAMFEK      |                  | protein kinase, cAMP dependent regulatory, type II alpha [Mus musculus]                             | 2007.9764 | 56.91 | 0           |
| 22550094 | NLDQEQLSQVLDAMFEK      | Oxidation (M)    | protein kinase, cAMP dependent regulatory, type II alpha [Mus musculus]                             | 2023.969  | 32.02 | 0           |
| 28173550 | NLEGYVGFANLPNQVYR      |                  | cell division cycle 10 homolog [Mus musculus]                                                       | 1953.9766 | 46.49 | 0.35947287  |
| 58037267 | NLEPEWAAAATEVK         |                  | protein disulfide isomerase-associated 6 [Mus musculus]                                             | 1528.7635 | 48.35 | 0.526566865 |
| 51770961 | NLETLQQLGIEGENR        |                  | PREDICTED: AFG3(ATPase family gene 3)-like 2 [Mus musculus]                                         | 1842.9054 | 53.09 | 0           |
| 22203747 | NLEWIAGGTWTPSALK       |                  | procollagen, type VI, alpha 2 [Mus musculus]                                                        | 1743.9069 | 72.8  | 0           |
| 6678499  | NLFFSTNIDDAIR          |                  | UDP-glucose dehydrogenase [Mus musculus]                                                            | 1525.7672 | 80.8  | 0.298726503 |
| 40254595 | NLHQSGFSLSGAQIDDNIPR   |                  | dihydropyrimidinase-like 2 [Mus musculus]                                                           | 2169.0605 | 37.83 | 3.516542914 |
| 21313308 | NLPFDFTWK              |                  | heterogeneous nuclear ribonucleoprotein M [Mus musculus]                                            | 1167.5846 | 35.93 | 0           |
| 9790067  | NLPGLVQEGEPFSEEAFLTK   |                  | staphylococcal nuclease domain containing 1 [Mus musculus]                                          | 2306.1594 | 79.34 | 0.634604327 |
| 20137006 | NLPYSEEIVEMYK          |                  | myosin, heavy polypeptide 9, non-muscle [Mus musculus]                                              | 1727.8519 | 41.86 | 0.429057869 |
| 13384620 | NLPLPPPPPPR            |                  | heterogeneous nuclear ribonucleoprotein K [Mus musculus]                                            | 1194.6945 | 26.41 | 0           |



|          |                           |                                      |                                                                                                      |           |        |             |
|----------|---------------------------|--------------------------------------|------------------------------------------------------------------------------------------------------|-----------|--------|-------------|
| 7305413  | NLQEAEEWYK                |                                      | peripherin 1 [Mus musculus]                                                                          | 1309.6051 | 69.92  | 0.310484673 |
| 31982755 | NLQEAEEWYK                |                                      | vimentin [Mus musculus]                                                                              | 1309.6051 | 69.92  | 0.310484673 |
| 51491845 | NLQNLLITAIK               |                                      | clathrin, heavy polypeptide (Hc) [Mus musculus]                                                      | 1353.8469 | 78.81  | 0.519812089 |
| 6678365  | NLQYYDISAK                |                                      | RAN, member RAS oncogene family [Mus musculus]                                                       | 1214.6027 | 52.28  | 0           |
| 21313290 | NLSIYDGPEQR               |                                      | electron transferring flavoprotein, dehydrogenase [Mus musculus]                                     | 1291.626  | 22.4   | 0.276524287 |
| 23956214 | NLSPYVSNELLEAFSQGPIER     |                                      | splicing factor proline/glutamine rich (polypyrimidine tract binding protein associated) [Mus muscu] | 2639.2996 | 45.99  | 0.558078335 |
| 6678331  | NLSVDVYYDAMGNPLEK         |                                      | transglutaminase 3, E polypeptide [Mus musculus]                                                     | 1927.9149 | 85.75  | 0           |
| 6678331  | NLSVDVYYDAMGNPLEK         | Oxidation (M)                        | transglutaminase 3, E polypeptide [Mus musculus]                                                     | 1943.9108 | 47.87  | 0           |
| 51708441 | NLTCLDLSNR                | Deamidation (NQ)                     | PREDICTED: similar to FLJ44691 protein [Mus musculus]                                                | 1236.5939 | 25.9   | 0           |
| 6678359  | NMAEQIIQIYSQVQSK          |                                      | transketolase [Mus musculus]                                                                         | 2008.9976 | 78.64  | 0.552208556 |
| 37693505 | NMAPSQSQPVRTASVNQRNR      | 4 Deamidation (NQ);<br>Oxidation (M) | abl-interactor 2 [Mus musculus]                                                                      | 2261.0632 | 22.14  | 0           |
| 7305295  | NMDPLNDNVTSLLNASSDK       |                                      | myosin, heavy polypeptide 11, smooth muscle [Mus musculus]                                           | 2047.9611 | 114.22 | 0           |
| 7305295  | NMDPLNDNVTSLLNASSDK       | Oxidation (M)                        | myosin, heavy polypeptide 11, smooth muscle [Mus musculus]                                           | 2063.9553 | 133.84 | 0.297463563 |
| 7949053  | NMGGPYGGGNYGPGSGSGGGYGGGR |                                      | heterogeneous nuclear ribonucleoprotein A2/B1 isoform 1 [Mus musculus]                               | 2189.9148 | 171.53 | 0.424659807 |
| 7949053  | NMGGPYGGGNYGPGSGSGGGYGGGR | Oxidation (M)                        | heterogeneous nuclear ribonucleoprotein A2/B1 isoform 1 [Mus musculus]                               | 2205.9031 | 120.26 | 0.359492819 |
| 21450277 | NMVPQQALVIR               |                                      | Na+/K+ -ATPase alpha 1 subunit [Mus musculus]                                                        | 1268.7153 | 51.17  | 0.716552387 |
| 6678145  | NNEDVSIIPPLFTVSDHR        |                                      | signal sequence receptor, delta [Mus musculus]                                                       | 2152.1021 | 26.92  | 0.985877433 |
| 31980868 | NNFLEDEPSAQHR             |                                      | kallikrein 6 [Mus musculus]                                                                          | 1556.7205 | 26.11  | 0.194442035 |
| 51491845 | NNLAGAEELFAR              |                                      | clathrin, heavy polypeptide (Hc) [Mus musculus]                                                      | 1304.6586 | 68.53  | 0.452709773 |
| 6679583  | NNLSFIETSALDNVVEEAFK      |                                      | RAB11B, member RAS oncogene family [Mus musculus]                                                    | 2329.1223 | 90.2   | 0           |
| 22203747 | NNYATMRPDSTEIDQDTINR      |                                      | procollagen, type VI, alpha 2 [Mus musculus]                                                         | 2354.0676 | 61.4   | 0.095299487 |
| 22203747 | NNYATMRPDSTEIDQDTINR      | Deamidation (NQ)                     | procollagen, type VI, alpha 2 [Mus musculus]                                                         | 2355.0623 | 75.48  | 0.086053057 |
| 6754856  | NPAETLLLSEPLNGDLLGQYSQLAR |                                      | nitrilase 1 [Mus musculus]                                                                           | 2712.4009 | 24.64  | 0           |
| 63530525 | NPAVLSAASFDR              |                                      | PREDICTED: SEC31-like 1 [Mus musculus]                                                               | 1304.6598 | 41.56  | 0           |
| 6754254  | NPDDITNEEYGEFYK           |                                      | heat shock protein 1, alpha [Mus musculus]                                                           | 1833.7792 | 108.11 | 0.552744112 |
| 40556608 | NPDDITQEEYGEFYK           |                                      | heat shock protein 1, beta [Mus musculus]                                                            | 1847.8004 | 102.46 | 0.599709389 |
| 51827543 | NPEILAIAPVLLDALTDPSR      |                                      | PREDICTED: GCN1 general control of amino-acid synthesis 1-like 1 [Mus musculus]                      | 2118.1697 | 30.77  | 0           |
| 63518159 | NPELQNLDDFFK              |                                      | PREDICTED: phosphogluconate dehydrogenase [Mus musculus]                                             | 1705.8781 | 92.51  | 0.70052655  |
| 6679891  | NPEPELLVR                 |                                      | alpha glucosidase 2 alpha neutral subunit [Mus musculus]                                             | 1066.5875 | 40.95  | 0           |
| 34996495 | NPILWNVADVVIK             |                                      | ribophorin II [Mus musculus]                                                                         | 1480.8429 | 40.63  | 0           |
| 6678329  | NPLSDPLYDCIFTVEGAGLTK     |                                      | transglutaminase 2, C polypeptide [Mus musculus]                                                     | 2253.1067 | 100.07 | 0.569854117 |
| 63556656 | NPNDDLTAVGGKPEGWK         |                                      | PREDICTED: RIKEN cDNA A430096B05 gene [Mus musculus]                                                 | 1797.8718 | 91.71  | 0           |
| 8567402  | NPPGFAFVEFEDPR            |                                      | splicing factor, arginine/serine-rich 3 (SRp20) [Mus musculus]                                       | 1621.7687 | 71.19  | 0.52970837  |
| 22122585 | NPPGFAFVEFEDPR            |                                      | splicing factor, arginine/serine-rich 7 [Mus musculus]                                               | 1621.7687 | 71.19  | 0.52970837  |
| 42734399 | NQALELEQLR                |                                      | desmuslin isoform H [Mus musculus]                                                                   | 1213.655  | 60.46  | 0.07869974  |
| 46559834 | NQALELEQLR                |                                      | desmuslin isoform M [Mus musculus]                                                                   | 1213.655  | 60.46  | 0.07869974  |
| 18875324 | NQAPGQPGASQWGSR           |                                      | DAZ associated protein 1 [Mus musculus]                                                              | 1540.7323 | 53.72  | 0.494654393 |
| 42734449 | NQFTVAQYK                 |                                      | sulfotransferase family 1D, member 1 [Mus musculus]                                                  | 1227.6133 | 26.65  | 0           |
| 33563270 | NQGYDYVVKPR               |                                      | oxoglutarate dehydrogenase (lipoamide) [Mus musculus]                                                | 1402.6725 | 29.94  | 1.624422586 |
| 31981722 | NQLTSPNPENTVFDKA          |                                      | heat shock 70kD protein 5 (glucose-regulated protein) [Mus musculus]                                 | 1677.806  | 105.72 | 0.367814029 |
| 6754482  | NQNINLENSLGDVEAR          |                                      | keratin complex 1, acidic, gene 18 [Mus musculus]                                                    | 1785.8761 | 93.09  | 0.369222948 |
| 20149720 | NQNLQEALQR                | 3 Deamidation (NQ)                   | oxidized low density lipoprotein (lectin-like) receptor 1 [Mus musculus]                             | 1216.5837 | 26.27  | 0           |
| 19526884 | NQQDQGLEESPGSWPGAGTIR     |                                      | GDP-mannose pyrophosphorylase A [Mus musculus]                                                       | 2227.0371 | 114.33 | 0.367723706 |
| 20330802 | NQQQGVCEGSDIDNSPVK        |                                      | transferrin [Mus musculus]                                                                           | 1900.8706 | 111.5  | 0.240458931 |
| 50080209 | NQVALNPQNTVFDKA           |                                      | heat shock protein 1A [Mus musculus]                                                                 | 1658.8546 | 39.4   | 0           |
| 31981690 | NQVAMNPTNTVFDKA           |                                      | heat shock protein 8 [Mus musculus]                                                                  | 1649.793  | 85.59  | 0           |
| 31981690 | NQVAMNPTNTVFDKA           | 2 Deamidation (NQ);<br>Oxidation (M) | heat shock protein 8 [Mus musculus]                                                                  | 1667.7611 | 30.51  | 0           |
| 31981690 | NQVAMNPTNTVFDKA           | Oxidation (M)                        | heat shock protein 8 [Mus musculus]                                                                  | 1665.7839 | 63.96  | 0           |
| 33563282 | NQYDNDVTVWSPQGR           |                                      | proteasome (prosome, macropain) subunit, alpha type 1 [Mus musculus]                                 | 1778.8177 | 53.04  | 0.593511361 |
| 46849705 | NSFMNGSWGAEER             |                                      | lectin, galactose binding, soluble 4 [Mus musculus]                                                  | 1484.6322 | 94.94  | 0.762166645 |
| 46849705 | NSFMNGSWGAEER             | Deamidation (NQ)                     | lectin, galactose binding, soluble 4 [Mus musculus]                                                  | 1485.6158 | 51.26  | 0           |
| 46849705 | NSFMNGSWGAEER             | Deamidation (NQ);<br>Oxidation (M)   | lectin, galactose binding, soluble 4 [Mus musculus]                                                  | 1501.6227 | 35.52  | 0           |
| 46849705 | NSFMNGSWGAEER             | Oxidation (M)                        | lectin, galactose binding, soluble 4 [Mus musculus]                                                  | 1500.6217 | 25.05  | 0           |
| 31981690 | NSLESYAFNMK               |                                      | heat shock protein 8 [Mus musculus]                                                                  | 1303.5958 | 73.23  | 0           |
| 31981690 | NSLESYAFNMK               | Oxidation (M)                        | heat shock protein 8 [Mus musculus]                                                                  | 1319.5975 | 42.44  | 0.557008728 |
| 12746444 | NSLPLQEEENR               |                                      | melanoma cell adhesion molecule [Mus musculus]                                                       | 1328.649  | 22.35  | 0           |
| 7305295  | NSLQDQLDEEMEA             |                                      | myosin, heavy polypeptide 11, smooth muscle [Mus musculus]                                           | 1649.7349 | 90.66  | 2.337137289 |
| 54020742 | NSNILEDLETLR              |                                      | archain 1 [Mus musculus]                                                                             | 1416.7368 | 86.8   | 0.410366747 |
| 50355692 | NSNLVGAHEELQQSR           |                                      | lamin A isoform A [Mus musculus]                                                                     | 1752.8618 | 72.62  | 0.18138311  |

|          |                              |                                                                        |                                                                                                    |           |             |             |
|----------|------------------------------|------------------------------------------------------------------------|----------------------------------------------------------------------------------------------------|-----------|-------------|-------------|
| 27312018 | NSRDQLLAIR                   | 2 Deamidation (NQ)                                                     | leiomodin 1 (smooth muscle) [Mus musculus]                                                         | 1258.675  | 26.32       | 0           |
| 22165384 | NSSYFVEWIPNNVK               |                                                                        | tubulin, beta, 2 [Mus musculus]                                                                    | 1696.8239 | 46.97       | 0.374662483 |
| 33859488 | NSSYFVEWIPNNVK               |                                                                        | tubulin, beta 2 [Mus musculus]                                                                     | 1696.8239 | 46.97       | 0.374662483 |
| 12963615 | NSSYFVEWIPNNVK               |                                                                        | tubulin, beta 3 [Mus musculus]                                                                     | 1696.8239 | 46.97       | 0.374662483 |
| 31981939 | NSSYFVEWIPNNVK               |                                                                        | tubulin, beta 4 [Mus musculus]                                                                     | 1696.8239 | 46.97       | 0.374662483 |
| 7106439  | NSSYFVEWIPNNVK               |                                                                        | tubulin, beta 5 [Mus musculus]                                                                     | 1696.8239 | 46.97       | 0.374662483 |
| 27754056 | NSSYFVEWIPNNVK               |                                                                        | tubulin, beta 6 [Mus musculus]                                                                     | 1696.8239 | 46.97       | 0.374662483 |
| 21746161 | NSSYFVEWIPNNVK               |                                                                        | tubulin, beta [Mus musculus]                                                                       | 1696.8239 | 46.97       | 0.374662483 |
| 6678359  | NSTFSELFK                    |                                                                        | transketolase [Mus musculus]                                                                       | 1072.5436 | 41.58       | 0.439064263 |
| 31982236 | NSYPLAVGSLSDSVTIFR           |                                                                        | integrin alpha 6 [Mus musculus]                                                                    | 2041.0161 | 47.31       | 0           |
| 6996917  | NSYVAGQYDDAASYK              |                                                                        | glucose-6-phosphate dehydrogenase X-linked [Mus musculus]                                          | 1651.7247 | 98.72       | 0.718177518 |
| 31981983 | NTGASSGATSEESTEAEFCR         |                                                                        | stromal interaction molecule 1 [Mus musculus]                                                      | 2033.8451 | 39.66       | 0.305875646 |
| 31981562 | NTGIITIGPASR                 |                                                                        | pyruvate kinase 3 [Mus musculus]                                                                   | 1302.6785 | 47.04       | 0.564651522 |
| 22164798 | NTGTEAPDYLATVDVDPK           |                                                                        | selenium binding protein 1 [Mus musculus]                                                          | 1905.9116 | 91.12       | 0           |
| 31791057 | NTIEETGILAEK                 |                                                                        | laminin, gamma 1 [Mus musculus]                                                                    | 1345.6923 | 22.58       | 0           |
| 6680572  | NTIQWLENELNR                 |                                                                        | kinesin family member 5B [Mus musculus]                                                            | 1529.7739 | 32.95       | 0           |
| 32567788 | NTLFLNSFLDK                  |                                                                        | phosphatidylinositol-binding clathrin assembly protein [Mus musculus]                              | 1425.7487 | 40.31       | 0.466015206 |
| 46195798 | NTLLIAGLQAR                  |                                                                        | dolichyl-di-phosphooligosaccharide-protein glycotransferase [Mus musculus]                         | 1169.6993 | 43.23       | 0           |
| 33563270 | NTNAGAPPGTAYQSPLSLR          |                                                                        | oxoglutarate dehydrogenase (lipoamide) [Mus musculus]                                              | 2002.0038 | 87.68       | 0.227818213 |
| 33859560 | NTNDANSCQIIPQNVNR            |                                                                        | guanosine diphosphate (GDP) dissociation inhibitor 1 [Mus musculus]                                | 2142.0374 | 80.63       | 0.285742426 |
| 56119103 | NTNDANSCQIIPQNVNR            |                                                                        | guanosine diphosphate (GDP) dissociation inhibitor 3 [Mus musculus]                                | 2142.0374 | 80.63       | 0.285742426 |
| 6754556  | NTSEQDQPMGGWEMIR             |                                                                        | lamin B1 [Mus musculus]                                                                            | 1878.8158 | 51.43       | 0.401712416 |
| 54607098 | NTVIATGGYGR                  |                                                                        | succinate dehydrogenase Fp subunit [Mus musculus]                                                  | 1108.5797 | 32.07       | 0.391014719 |
| 8567336  | NVAILIPESWK                  |                                                                        | chloride channel calcium activated 3 [Mus musculus]                                                | 1269.7168 | 51.88       | 0           |
| 8567336  | NVAILIPESWK                  |                                                                        | chloride channel calcium activated 3 [Mus musculus]                                                | 1270.7207 | 40.76       | 0           |
| 6680678  | NVDEAINFINDR                 |                                                                        | aldehyde dehydrogenase family 3, subfamily A2 [Mus musculus]                                       | 1419.6906 | 67.84       | 0           |
| 31981570 | NVDLQVLAPEPELLYK             |                                                                        | polymeric immunoglobulin receptor [Mus musculus]                                                   | 1841.0033 | 22.8        | 0           |
| 6679012  | NVDMLSELVQEYDEPIIK           |                                                                        | nucleosome assembly protein 1-like 4 [Mus musculus]                                                | 2135.0649 | 24.54       | 0           |
| 21313536 | NVETMNYADIER                 |                                                                        | dihydrodipicolinate S-succinyltransferase (E2 component of 2-oxo-glutarate complex) [Mus musculus] | 1470.6514 | 23.79       | 0.178933712 |
| 6753364  | NVFDEAILAALPEPEPK            |                                                                        | cell division cycle 42 homolog [Mus musculus]                                                      | 1852.9637 | 77.03       | 0.49411963  |
| 6678986  | NVLDTSWPTPPALR               |                                                                        | myosin IC [Mus musculus]                                                                           | 1663.8807 | 28.68       | 0           |
| 29788753 | NVLITDFGVSVR                 |                                                                        | phosphatidylinositol glycan, class K [Mus musculus]                                                | 1367.735  | 34.31       | 0           |
| 9790261  | NVMSAFGLTDDQVSGPPSAPTEDR     |                                                                        | Trk-fused gene [Mus musculus]                                                                      | 2491.1365 | 83.24       | 0.549595937 |
| 11968166 | NVNGVNYASVTR                 |                                                                        | cathepsin Z preproprotein [Mus musculus]                                                           | 1293.6611 | 42.99       | 0.758374599 |
| 21450341 | NVNTALNTQIPSSIEDIFNDDR       |                                                                        | amyloid beta precursor protein binding protein 1 [Mus musculus]                                    | 2577.2529 | 42.46       | 0.47460931  |
| 6680748  | NVQAEEMVFSSGLK               |                                                                        | ATP synthase, H+ transporting, mitochondrial F1 complex, alpha subunit, isoform 1 [Mus musculus]   | 1667.7917 | 41.38       | 0           |
| 31560607 | NVQGVNYVSPVR                 |                                                                        | cathepsin C preproprotein [Mus musculus]                                                           | 1331.7078 | 26.18       | 0.566306476 |
| 34536819 | NVSINTVTYEWAPPVQNQALAR       |                                                                        | testis derived transcript [Mus musculus]                                                           | 2471.2686 | 46.05       | 0.226080605 |
| 10946676 | NYAEVYEPGVK                  |                                                                        | solute carrier family 26, member 3 [Mus musculus]                                                  | 1397.6571 | 46.87       | 0           |
| 51768458 | NYDPLSPAPAAPPAER             |                                                                        | PREDICTED: similar to mKIAA0177 protein [Mus musculus]                                             | 1665.83   | 34.95       | 0           |
| 21450323 | NYILDQTNVYGSAR               |                                                                        | EIB-55kDa associated protein 5 [Mus musculus]                                                      | 1741.8488 | 65.02       | 0.846704844 |
| 33859520 | NYIPDEADFLGMDATVK            |                                                                        | caspase 8 [Mus musculus]                                                                           | 1896.922  | 27.46       | 0           |
| 6680934  | NYLNYPGEEDQGR                |                                                                        | chromogranin B [Mus musculus]                                                                      | 1514.6564 | 48.48       | 0           |
| 13384736 | NYMSNPSYNYEIVNR              |                                                                        | dynein, cytoplasmic, heavy chain 1 [Mus musculus]                                                  | 1863.8304 | 80.39       | 0           |
| 21703842 | NYNDELQFLDK                  | hypothetical protein LOC28088 [Mus musculus]                           | 1398.6638                                                                                          | 35.54     | 0           |             |
| 6756033  | NYQQNYQNSSEGEKNEGSESAPGQQAQR | nuclease sensitive element binding protein 1 [Mus musculus]            | 3257.3828                                                                                          | 50.67     | 0.517183872 |             |
| 51771420 | NYYYGQGYR                    | PREDICTED: hypothetical protein LOC68693 [Mus musculus]                | 1183.5197                                                                                          | 41.33     | 0.485180404 |             |
| 6753618  | PFVELETNLPASR                | D-dopachrome tautomerase [Mus musculus]                                | 1472.7698                                                                                          | 48.27     | 0           |             |
| 6671549  | PGGLLLGDEAPNFEANTTIGR        | peroxiredoxin 6 [Mus musculus]                                         | 2142.0837                                                                                          | 134.56    | 0.112396793 |             |
| 16716467 | PLELELCPGR                   | N-acetylneuraminic acid synthase (sialic acid synthase) [Mus musculus] | 1126.5928                                                                                          | 45.46     | 0.231761973 |             |
| 51766008 | PLLEGPVGVEDLILLEPLDEESLIK    | PREDICTED: myosin IA [Mus musculus]                                    | 2730.5015                                                                                          | 64.98     | 0           |             |
| 6754084  | PMILGYWNVK                   | glutathione S-transferase, mu 1 [Mus musculus]                         | 1248.6598                                                                                          | 42.48     | 0           |             |
| 10092608 | PPYTIVYFPVR                  | glutathione S-transferase, pi 1 [Mus musculus]                         | 1351.7416                                                                                          | 35.09     | 0.598568424 |             |
| 6680842  | QAALQVADGFSR                 | gelsolin-like capping protein [Mus musculus]                           | 1375.7324                                                                                          | 27.54     | 1.371875271 |             |
| 31981111 | QADEEFQILANSWR               | implantation-associated protein [Mus musculus]                         | 1706.8231                                                                                          | 53.57     | 0.484793954 |             |
| 7305295  | QADLEKEELAEELASSLSGR         | myosin, heavy polypeptide 11, smooth muscle [Mus musculus]             | 2175.0742                                                                                          | 144.67    | 0           |             |
| 7305295  | QADLEKEELAEELASSLSGR         | myosin, heavy polypeptide 11, smooth muscle [Mus musculus]             | 2176.0898                                                                                          | 113.6     | 0.243642061 |             |
| 7304881  | QAFQIGSPWR                   | aldehyde dehydrogenase family 1, subfamily A1 [Mus musculus]           | 1189.6112                                                                                          | 22.72     | 0.670270974 |             |
| 18079351 | QAIPLDQNEGYYVDVK             | major vault protein [Mus musculus]                                     | 1929.9961                                                                                          | 38.9      | 0           |             |
| 6754482  | QAQEYEAALLNIK                | keratin complex 1, acidic, gene 18 [Mus musculus]                      | 1419.7416                                                                                          | 73.94     | 0.890650716 |             |

|          |                          |                    |                                                                                                     |           |        |             |
|----------|--------------------------|--------------------|-----------------------------------------------------------------------------------------------------|-----------|--------|-------------|
| 125083   | QAQEYEALLNIK             |                    | Keratin, type I cytoskeletal 18 (Cytokeratin 18) (K18) (CK 18)                                      | 1419.7416 | 73.94  | 0.890650716 |
| 6754256  | QAVTNPNNTFYATK           |                    | heat shock protein 9A [Mus musculus]                                                                | 1568.7687 | 48.85  | 0.622237261 |
| 7304889  | QDAQELYEAGEK             |                    | annexin A4 [Mus musculus]                                                                           | 1380.6357 | 50.8   | 0.312768755 |
| 63489754 | QDEVNAAWQR               |                    | PREDICTED: similar to Spectrin alpha chain, brain (Spectrin, non-erythroid alpha chain) (Alpha-II s | 1216.5745 | 33.81  | 0           |
| 6996913  | QDIASFAYQR               |                    | annexin A2 [Mus musculus]                                                                           | 1111.5656 | 42.3   | 0.591451842 |
| 31791057 | QDIAVISDSYFPR            |                    | laminin, gamma 1 [Mus musculus]                                                                     | 1510.7521 | 43.53  | 0           |
| 6754854  | QDLGSPEGIALDHLGR         |                    | nidogen 1 [Mus musculus]                                                                            | 1677.8512 | 35.8   | 0           |
| 6753294  | QDLLAYLQR                |                    | catenin alpha 1 [Mus musculus]                                                                      | 1119.6207 | 30.63  | 0           |
| 6680716  | QDLPNAMNAEITDK           |                    | ADP-ribosylation factor 1 [Mus musculus]                                                            | 1630.7739 | 52.61  | 2.256326712 |
| 6680716  | QDLPNAMNAEITDK           | Oxidation (M)      | ADP-ribosylation factor 1 [Mus musculus]                                                            | 1646.7572 | 29.97  | 0           |
| 63487095 | QDVYGPQPQVR              |                    | PREDICTED: catenin src [Mus musculus]                                                               | 1286.6547 | 35.01  | 0.554148939 |
| 20838286 | QEANGKGNR                | 2 Deamidation (NQ) | PREDICTED: similar to fatty acid desaturase 2 [Mus musculus]                                        | 975.4631  | 33.81  | 0           |
| 31559995 | QEAVALLQGQR              |                    | v-crk sarcoma virus CT10 oncogene homolog [Mus musculus]                                            | 1212.6639 | 37.64  | 0.464411268 |
| 55742711 | QEELESVEAGVQGGAFEGTR     |                    | EH-domain containing 2 [Mus musculus]                                                               | 2092.9841 | 150.91 | 0           |
| 30794206 | QEEMNSQLQEEEEEMETDTR     |                    | splicing factor 3b, subunit 2 [Mus musculus]                                                        | 2242.8694 | 48.07  | 0.435172557 |
| 41322904 | QEEVYSELQAR              |                    | plectin 1 isoform 1 [Mus musculus]                                                                  | 1351.6509 | 33.25  | 0           |
| 21450129 | QEQDTYALSSYTR            |                    | acetyl-Coenzyme A acetyltransferase 1 precursor [Mus musculus]                                      | 1561.7179 | 67.95  | 0.442734026 |
| 6671507  | QEYDEAGPSIVHR            |                    | actin, alpha 2, smooth muscle, aorta [Mus musculus]                                                 | 1500.7241 | 81.13  | 0           |
| 6671509  | QEYDESGPSIVHR            |                    | actin, beta, cytoplasmic [Mus musculus]                                                             | 1516.7228 | 73.92  | 0.683335372 |
| 6678331  | QEYVEEDSGIIVYGSTNR       |                    | transglutaminase 3, E polypeptide [Mus musculus]                                                    | 2058.9631 | 121.33 | 0.09579279  |
| 33859482 | QFAEMYVAK                |                    | eukaryotic translation elongation factor 2 [Mus musculus]                                           | 1086.5276 | 52.11  | 0.561276121 |
| 20149756 | QFFVAVER                 |                    | DEAD (Asp-Glu-Ala-Asp) box polypeptide 48 [Mus musculus]                                            | 995.5349  | 28.72  | 0.430434275 |
| 63476037 | QFQVAPLTIAR              |                    | PREDICTED: procollagen, type VI, alpha 3 [Mus musculus]                                             | 1172.6776 | 41.02  | 0           |
| 13385878 | QFLESSELPR               |                    | sorting nexin 2 [Mus musculus]                                                                      | 1205.6044 | 23.16  | 0           |
| 42415475 | QFLLAEEAIDDPFGITSNSGVFSK |                    | prolyl 4-hydroxylase, beta polypeptide [Mus musculus]                                               | 2640.3474 | 83.69  | 0.661697104 |
| 18266680 | QFLSGELEVLTPQGTLAER      |                    | 3-oxoacid CoA transferase 1 [Mus musculus]                                                          | 2217.1001 | 29.52  | 0           |
| 42734399 | QFTQSPGAEEEAATSPFDTK     |                    | desmuslin isoform H [Mus musculus]                                                                  | 2069.9358 | 61.3   | 0.104711753 |
| 46559834 | QFTQSPGAEEEAATSPFDTK     |                    | desmuslin isoform M [Mus musculus]                                                                  | 2069.9358 | 61.3   | 0.104711753 |
| 21450625 | QFYINVER                 |                    | eukaryotic translation initiation factor 4A1 [Mus musculus]                                         | 1068.5491 | 35.3   | 0.392269013 |
| 22164798 | QFYPDLR                  |                    | selenium binding protein 1 [Mus musculus]                                                           | 1051.5603 | 42.8   | 0.211473237 |
| 6753086  | QGFCELLQAVPLADSR         |                    | apurinic/apryrimidinic endonuclease 1 [Mus musculus]                                                | 1847.9657 | 42.11  | 0.47525779  |
| 6754976  | QGGLGPMNIPLISDPK         |                    | peroxiredoxin 1 [Mus musculus]                                                                      | 1636.8665 | 55.71  | 1.494116804 |
| 15147224 | QGIVPAGLTENELWR          |                    | sideroflexin 1 [Mus musculus]                                                                       | 1682.8859 | 46.78  | 0.408893728 |
| 18079339 | QGLPLTFADPSDYNK          |                    | aconitase 2, mitochondrial [Mus musculus]                                                           | 1778.8651 | 45.72  | 0           |
| 6680748  | QQQYSPMAIEEQVAVIYAGVR    |                    | ATP synthase, H+ transporting, mitochondrial F1 complex, alpha subunit, isoform 1 [Mus musculus]    | 2309.1633 | 124.82 | 0.269625879 |
| 6680748  | QQQYSPMAIEEQVAVIYAGVR    | Oxidation (M)      | ATP synthase, H+ transporting, mitochondrial F1 complex, alpha subunit, isoform 1 [Mus musculus]    | 2325.1536 | 33.73  | 0.247800668 |
| 9845299  | QGTFSHQQALEYGTX          |                    | succinate-CoA ligase, GDP-forming, alpha subunit [Mus musculus]                                     | 1694.8092 | 38.67  | 0           |
| 33695134 | QGTQYTFSSIER             |                    | structure specific recognition protein 1 [Mus musculus]                                             | 1416.676  | 29.22  | 1.536581371 |
| 453155   | QGVADINGLR               |                    | keratin 9 [Homo sapiens]                                                                            | 1157.5894 | 42.86  | 0           |
| 6680117  | QIEINTISASFGLASR         |                    | glutathione synthetase [Mus musculus]                                                               | 1763.9169 | 36.28  | 0           |
| 6753820  | QIEIQAQGDR               |                    | FUS interacting protein (serine-arginine rich) 1 [Mus musculus]                                     | 1304.6567 | 24.17  | 0.37816203  |
| 7549752  | QIGLDQIWDDLDR            |                    | cullin 1 [Mus musculus]                                                                             | 1471.759  | 27.2   | 0           |
| 6753294  | QIIVDPLSFSEER            |                    | catenin alpha 1 [Mus musculus]                                                                      | 1532.7998 | 36.13  | 0           |
| 18250296 | QINWTVLYR                |                    | ribosomal protein L24 [Mus musculus]                                                                | 1192.6503 | 52.95  | 0.489554128 |
| 16716471 | QIPVVGSVLWNFSPVQASQK     |                    | hypothetical protein LOC94184 [Mus musculus]                                                        | 2184.1787 | 78.31  | 0.954290835 |
| 31982526 | QIQEEITGNTEALSGR         |                    | parvin, alpha [Mus musculus]                                                                        | 1745.8643 | 99.14  | 0           |
| 37620153 | QISEGVEVIHK              |                    | myosin, light polypeptide kinase telokin isoform [Mus musculus]                                     | 1302.6556 | 29.91  | 0           |
| 1346343  | QISNLQQSISDAEQR          |                    | Keratin, type II cytoskeletal 1 (Cytokeratin 1) (K1) (CK 1) (67 kDa cytokeratin) (Hair alpha protei | 1716.8513 | 94.01  | 0.346559325 |
| 6754976  | QITINDLPVGR              |                    | peroxiredoxin 1 [Mus musculus]                                                                      | 1225.6949 | 64.04  | 0.344903507 |
| 8394024  | QITQVYGFDYDECLR          |                    | protein phosphatase 2a, catalytic subunit, beta isoform [Mus musculus]                              | 1734.8224 | 23.35  | 0.321617552 |
| 9790175  | QITQVYGFDYDECLR          |                    | protein phosphatase 4, catalytic subunit [Mus musculus]                                             | 1734.8224 | 23.35  | 0.321617552 |
| 34610207 | QIWQNLGLDEAR             |                    | alanyl-tRNA synthetase [Mus musculus]                                                               | 1442.7286 | 24.63  | 0           |
| 21704156 | QKEFDPITDGLSGPSR         |                    | caldesmon 1 [Mus musculus]                                                                          | 1934.947  | 90.06  | 0.158694961 |
| 42415475 | QLAPIWDK                 |                    | prolyl 4-hydroxylase, beta polypeptide [Mus musculus]                                               | 970.5438  | 39.08  | 0.114199873 |
| 6755354  | QLDSGLLLVTGPLVINR        |                    | ribosomal protein L6 [Mus musculus]                                                                 | 1808.0681 | 119.05 | 0.504214046 |
| 11875203 | QLEEEQALQK               |                    | tropomyosin 2, beta [Mus musculus]                                                                  | 1343.6787 | 37.93  | 1.615732041 |
| 6754750  | QLFDQVVK                 |                    | moesin [Mus musculus]                                                                               | 976.5435  | 42.56  | 0.404878157 |
| 6677699  | QLFDQVVK                 |                    | radixin [Mus musculus]                                                                              | 976.5435  | 42.56  | 0.404878157 |
| 6678571  | QLFDQVVK                 |                    | villin 2 [Mus musculus]                                                                             | 976.5435  | 42.56  | 0.404878157 |
| 34740335 | QLFHPEQLITGK             |                    | tubulin, alpha 2 [Mus musculus]                                                                     | 1410.7701 | 43.96  | 0           |

|          |                            |                     |                                                                                                     |           |        |             |
|----------|----------------------------|---------------------|-----------------------------------------------------------------------------------------------------|-----------|--------|-------------|
| 6678467  | QLFHPEQLITGK               |                     | tubulin, alpha 4 [Mus musculus]                                                                     | 1410.7701 | 43.96  | 0           |
| 6678469  | QLFHPEQLITGK               |                     | tubulin, alpha 6 [Mus musculus]                                                                     | 1410.7701 | 43.96  | 0           |
| 7305295  | QLHEYETELEDER              |                     | myosin, heavy polypeptide 11, smooth muscle [Mus musculus]                                          | 1690.7578 | 62.12  | 0.061269913 |
| 7305295  | QLLQANPILEAFGNAK           |                     | myosin, heavy polypeptide 11, smooth muscle [Mus musculus]                                          | 1726.9481 | 100.55 | 0           |
| 20137006 | QLLQANPILEAFGNAK           |                     | myosin, heavy polypeptide 9, non-muscle [Mus musculus]                                              | 1726.9481 | 100.55 | 0           |
| 29336026 | QLLQANPILEAFGNAK           |                     | nonmuscle myosin heavy chain [Mus musculus]                                                         | 1726.9481 | 100.55 | 0           |
| 6678571  | QLLTLNLSLQAR               |                     | villin 2 [Mus musculus]                                                                             | 1472.8022 | 48.93  | 0.345892406 |
| 6755608  | QLMGMNQLTSLR               | 2 Deamidation (NQ)  | SRY (sex determining region Y)-box 5 [Mus musculus]                                                 | 1506.7772 | 23.98  | 0.194999069 |
| 50355692 | QLQDEMLR                   | Oxidation (M)       | lamin A isoform A [Mus musculus]                                                                    | 1048.514  | 22.48  | 0.366502279 |
| 63641940 | QLQNIIQATSR                |                     | PREDICTED: desmoplakin [Mus musculus]                                                               | 1271.7021 | 22.68  | 4.433971763 |
| 22122569 | QLSQNFLLDLR                | 3 Deamidation (NQ)  | transcription factor B1, mitochondrial [Mus musculus]                                               | 1349.7084 | 42.34  | 0           |
| 56605979 | QLTEMLPSILNQLGADSLTSLR     |                     | basic transcription factor 3 [Mus musculus]                                                         | 2400.2769 | 44.86  | 0.575700919 |
| 7304993  | QLTQPETSYGR                |                     | drebrin-like [Mus musculus]                                                                         | 1279.6301 | 35.96  | 0.854744463 |
| 13385718 | QLVEQVEQIKK                |                     | transmembrane emp24 protein transport domain containing 9 [Mus musculus]                            | 1341.7312 | 54.09  | 0           |
| 31542427 | QLYQTLTDYDIR               |                     | casein kinase II, alpha 1 polypeptide [Mus musculus]                                                | 1528.7603 | 52.85  | 0           |
| 30519911 | QMEQISQFLQAAER             |                     | transgelin 2 [Mus musculus]                                                                         | 1678.8286 | 37.78  | 0           |
| 6755714  | QMEQVAQFLK                 |                     | transgelin [Mus musculus]                                                                           | 1221.6283 | 42.06  | 0           |
| 63746482 | QMQLNVSALEFLDR             |                     | PREDICTED: filamin, alpha [Mus musculus]                                                            | 1891.9574 | 78.65  | 0           |
| 50355692 | QNGDDPLMTYR                |                     | lamin A isoform A [Mus musculus]                                                                    | 1309.5854 | 43.11  | 0.661437651 |
| 51712333 | QNGVLSNWTQDQSK             |                     | PREDICTED: similar to anti-PRSV coat protein monoclonal antibody PRSV-L 3-8 immunoglobulin light ch | 1591.7341 | 69.98  | 0           |
| 29789245 | QNQLLLER                   | Deamidation (NQ)    | centrosomal colon cancer autoantigen [Mus musculus]                                                 | 1014.553  | 33.08  | 0           |
| 6678483  | QNSLDEDLIR                 |                     | ubiquitin-activating enzyme E1, Chr X [Mus musculus]                                                | 1202.5983 | 28.2   | 0.205915178 |
| 6753914  | QNYSTEVEAAVNR              |                     | ferritin light chain 1 [Mus musculus]                                                               | 1480.7015 | 56.08  | 0           |
| 22122789 | QPSLSAAACLGPEVTTQYGGLYR    |                     | acylpeptide hydrolase [Mus musculus]                                                                | 2311.1338 | 25.35  | 0.439890878 |
| 30794450 | QPYAVSELAGHQTSAESWGTGR     |                     | ribosomal protein L4 [Mus musculus]                                                                 | 2332.092  | 40.47  | 0.565328441 |
| 28892785 | QPYFGAVVGR                 |                     | aldose 1-epimerase [Mus musculus]                                                                   | 1093.5787 | 29.19  | 0           |
| 29789080 | QQALTVDTPDPEHR             |                     | coatamer protein complex, subunit beta 2 (beta prime) [Mus musculus]                                | 1481.7396 | 50.03  | 0.326412741 |
| 13507628 | QQEQTAQGTAPDAVDQQR         |                     | LPS-responsive beige-like anchor [Mus musculus]                                                     | 1970.9199 | 86.23  | 0.424312997 |
| 6671702  | QQISLATQMVR                |                     | chaperonin subunit 5 (epsilon) [Mus musculus]                                                       | 1274.6903 | 29.36  | 0           |
| 29789189 | QQKQQMLEMR                 | 3 Deamidation (NQ); | minichromosome maintenance protein 10 [Mus musculus]                                                | 1338.6144 | 24.54  | 0           |
| 42734399 | QQLDELNWSTRALAEGER         | Oxidation (M)       | desmuslin isoform H [Mus musculus]                                                                  | 1959.9419 | 96.51  | 0           |
| 46559834 | QQLDELNWSTRALAEGER         |                     | desmuslin isoform M [Mus musculus]                                                                  | 1959.9419 | 96.51  | 0           |
| 14861854 | QQLETLQLDGGGR              |                     | keratin complex 2, basic, gene 7 [Mus musculus]                                                     | 1357.7028 | 48.2   | 0           |
| 14861854 | QQLETLQLDGGGR              | 2 Deamidation (NQ)  | keratin complex 2, basic, gene 7 [Mus musculus]                                                     | 1359.6967 | 44.92  | 0           |
| 41322904 | QQNLSYDYVR                 |                     | plectin 1 isoform 1 [Mus musculus]                                                                  | 1356.658  | 56.33  | 0           |
| 31981828 | QQPLFVSGGDDYK              |                     | coatamer protein complex subunit alpha [Mus musculus]                                               | 1453.6868 | 39.19  | 0           |
| 22550094 | QQPPDLVDFAVEYFTR           |                     | protein kinase, cAMP dependent regulatory, type II alpha [Mus musculus]                             | 1924.9468 | 57.05  | 0.207507914 |
| 13385878 | QQQFENLDQQLR               |                     | sorting nexin 2 [Mus musculus]                                                                      | 1546.7616 | 30.72  | 0           |
| 21312968 | QQSEEDLLQLDQFSR            |                     | signal sequence receptor, gamma [Mus musculus]                                                      | 1707.823  | 84.16  | 0.392162191 |
| 63476037 | QQSLETAMSFVAR              |                     | PREDICTED: procollagen, type VI, alpha 3 [Mus musculus]                                             | 1467.7255 | 39.65  | 0.487787433 |
| 63660302 | QQYNVTYVVK                 |                     | PREDICTED: filamin B, beta [Mus musculus]                                                           | 1241.6426 | 53.14  | 0           |
| 41322904 | QSAAEQQAQAQAAAEK           |                     | plectin 1 isoform 1 [Mus musculus]                                                                  | 1957.9255 | 103.06 | 0.655475046 |
| 6754508  | QSFTMVADTPENLR             |                     | LIM and SH3 protein 1 [Mus musculus]                                                                | 1608.7766 | 66.66  | 0           |
| 30794412 | QSSYGQSYNNQGGQNTSSGQGGGR   |                     | TAF15 RNA polymerase II, TATA box binding protein (TBP)-associated factor [Mus musculus]            | 2747.1614 | 102.11 | 0.333623326 |
| 41322904 | QTNLENLDQAFSVAER           |                     | plectin 1 isoform 1 [Mus musculus]                                                                  | 1834.8993 | 59.93  | 0.499154077 |
| 30023842 | QTNPSAMEVEEDDPVPEIR        |                     | valosin containing protein [Mus musculus]                                                           | 2155.9861 | 46.97  | 0.471260162 |
| 7305291  | QTPAAPETEEPEPYR            |                     | metaxin 1 [Mus musculus]                                                                            | 1617.7443 | 46.52  | 0.276469737 |
| 50080209 | QTQTFTTYSDNQPGLIQVYEGER    |                     | heat shock protein 1A [Mus musculus]                                                                | 2774.3301 | 116.83 | 0.358451541 |
| 31981690 | QTQTFTTYSDNQPGLIQVYEGER    |                     | heat shock protein 8 [Mus musculus]                                                                 | 2774.3301 | 116.83 | 0.358451541 |
| 6680606  | QTSAMSSFGGTGGGSVR          |                     | keratin complex 1, acidic, gene 19 [Mus musculus]                                                   | 1586.7299 | 137.33 | 0           |
| 6680606  | QTSAMSSFGGTGGGSVR          | Oxidation (M)       | keratin complex 1, acidic, gene 19 [Mus musculus]                                                   | 1602.719  | 44.08  | 0.716398306 |
| 8567336  | QTTTPMTAQPAPTFSLQIGQR      |                     | chloride channel calcium activated 3 [Mus musculus]                                                 | 2383.2568 | 88.42  | 0.049863646 |
| 8567336  | QTTTPMTAQPAPTFSLQIGQR      | Oxidation (M)       | chloride channel calcium activated 3 [Mus musculus]                                                 | 2399.2441 | 80.78  | 0           |
| 6679503  | QTYFLPVLGLVDAEK            |                     | proteasome (prosome, macropain) 26S subunit, ATPase 3 [Mus musculus]                                | 1692.9163 | 67.03  | 0           |
| 22267442 | QVAEQFLNMR                 |                     | ubiquinol cytochrome c reductase core protein 2 [Mus musculus]                                      | 1235.6217 | 38.39  | 0.472144687 |
| 31542143 | QVELALWDTAGQEDYDR          |                     | ras homolog gene family, member A [Mus musculus]                                                    | 2008.9106 | 60.79  | 0.339199723 |
| 33859753 | QVEVDAQQCMLIEILDAGTEQFTAMR |                     | RAS related protein 1b [Mus musculus]                                                               | 2927.3286 | 31.38  | 0.342582965 |
| 28316750 | QVHPDTGISSK                |                     | histone 1, H2ba [Mus musculus]                                                                      | 1168.5958 | 25.35  | 0           |
| 20874851 | QVHPDTGISSK                |                     | PREDICTED: similar to histone H2b-616 [Mus musculus]                                                | 1168.5958 | 25.35  | 0           |
| 6753864  | QVIGTGSFFPK                |                     | four and a half LIM domains 1 [Mus musculus]                                                        | 1180.6323 | 47.24  | 0           |

|          |                         |                                                                                           |                                                                         |           |             |             |
|----------|-------------------------|-------------------------------------------------------------------------------------------|-------------------------------------------------------------------------|-----------|-------------|-------------|
| 27754099 | QVLEPSFR                |                                                                                           | eukaryotic translation elongation factor 1 gamma [Mus musculus]         | 975.5236  | 37.79       | 0.691441859 |
| 22122789 | QVLLSEPEEAALYR          |                                                                                           | acylpeptide hydrolase [Mus musculus]                                    | 1687.9015 | 41.03       | 0.240073075 |
| 63680681 | QVSVGVQVPGR             | 2 Deamidation (NQ)                                                                        | PREDICTED: similar to Zinc finger protein 132 [Mus musculus]            | 1028.5203 | 32.92       | 0           |
| 6754524  | QVVDSAYEVVK             |                                                                                           | lactate dehydrogenase 1, A chain [Mus musculus]                         | 1250.6572 | 69.02       | 0           |
| 63562723 | QVVNIPSFIVR             |                                                                                           | PREDICTED: similar to 40S ribosomal protein S9 [Mus musculus]           | 1271.7471 | 36.09       | 0.591871708 |
| 6678573  | QVVVEGQEPANFWMALGGK     |                                                                                           | villin 1 [Mus musculus]                                                 | 2060.0234 | 33.28       | 1.235159793 |
| 50355690 | QWGWQTGR                |                                                                                           | ribosomal protein L17 [Mus musculus]                                    | 1018.4883 | 39.63       | 0.546940631 |
| 21313162 | QWLQEIDR                |                                                                                           | RAB1B, member RAS oncogene family [Mus musculus]                        | 1087.5511 | 30.92       | 0.417513588 |
| 6679587  | QWLQEIDR                |                                                                                           | RAB1, member RAS oncogene family [Mus musculus]                         | 1087.5511 | 30.92       | 0.417513588 |
| 21592285 | QWYETNAPSTIR            |                                                                                           | keratin 20 [Mus musculus]                                               | 1465.7083 | 66.03       | 0.49573228  |
| 11528504 | QYDYSSTIR               |                                                                                           | niban protein [Mus musculus]                                            | 1247.5568 | 25.44       | 0           |
| 6753620  | QYPISLVLAPTR            |                                                                                           | DEAD/H (Asp-Glu-Ala-Asp/His) box polypeptide 3, X-linked [Mus musculus] | 1357.788  | 25.02       | 0.928057291 |
| 13385558 | QYPYNLLYLER             |                                                                                           | NADH dehydrogenase (ubiquinone) 1 beta subcomplex 8 [Mus musculus]      | 1472.7188 | 27.01       | 0           |
| 33563250 | RIESLNEEIAFLK           |                                                                                           | desmin [Mus musculus]                                                   | 1561.8551 | 31.49       | 0.368019064 |
| 31542159 | SAAEMVLSDDNFASIVAAVEEGR |                                                                                           | ATPase, Ca+++ transporting, ubiquitous [Mus musculus]                   | 2381.1423 | 61.22       | 0           |
| 6754524  | SADTLWGIQK              |                                                                                           | lactate dehydrogenase 1, A chain [Mus musculus]                         | 1118.58   | 74.44       | 0.381413808 |
| 63476037 | SALLDSIQNLQVALTSK       |                                                                                           | PREDICTED: procollagen, type VI, alpha 3 [Mus musculus]                 | 1801.0035 | 70.36       | 0           |
| 30348966 | SALPAQSAATLPAR          |                                                                                           | spectrin beta 2 isoform 1 [Mus musculus]                                | 1353.7511 | 34.01       | 0.844658969 |
| 6754206  | SANLVAATLGAILNR         |                                                                                           | hexokinase 1 [Mus musculus]                                             | 1483.8619 | 36.53       | 0           |
| 6678992  | SAPSLEYCAELLGLDQQDLR    |                                                                                           | myosin VI [Mus musculus]                                                | 2208.05   | 56.46       | 0.706761987 |
| 63518159 | SAVDCQDQSWR             |                                                                                           | PREDICTED: phosphogluconate dehydrogenase [Mus musculus]                | 1280.5377 | 42.91       | 0.826470911 |
| 6754342  | SAVVEMLIMR              |                                                                                           | integrin linked kinase [Mus musculus]                                   | 1148.6144 | 44.94       | 0           |
| 31981013 | SAVYPTSAVQMEALR         |                                                                                           | methionine sulfoxide reductase A [Mus musculus]                         | 1693.8472 | 32.56       | 1.528902036 |
| 29293809 | SAYDSTMETMNYAQIR        |                                                                                           | ATP citrate lyase [Mus musculus]                                        | 1880.8199 | 77.02       | 0           |
| 29293809 | SAYDSTMETMNYAQIR        |                                                                                           | ATP citrate lyase [Mus musculus]                                        | 1896.8148 | 24          | 0           |
| 136429   | SCAAAGTECLISGWGNTK      |                                                                                           | Trypsin precursor                                                       | 1768.8016 | 124.68      | 0           |
| 6755965  | SCSGVEFSTSGSNTDTGK      |                                                                                           | voltage-dependent anion channel 2 [Mus musculus]                        | 1850.7749 | 117.53      | 0.440041878 |
| 54020676 | SDAAPTPVPQSAPR          | hypothetical protein LOC229317 [Mus musculus]                                             | 1393.7128                                                               | 60.18     | 0.444944957 |             |
| 15809004 | SDAILDNTMSEIMESGYTR     | cyclin M4 [Mus musculus]                                                                  | 2280.0261                                                               | 29.76     | 0           |             |
| 31543051 | SDFDMVDYLNELR           | karyopherin (importin) beta 1 [Mus musculus]                                              | 1616.7434                                                               | 33.12     | 0           |             |
| 18079339 | SDFDPGQDTYQHPPK         | aconitase 2, mitochondrial [Mus musculus]                                                 | 1731.7627                                                               | 65.17     | 0.102009696 |             |
| 31981722 | SDIDEIVLGGSTR           | heat shock 70kD protein 5 (glucose-regulated protein) [Mus musculus]                      | 1460.7596                                                               | 88.23     | 0           |             |
| 6754256  | SDIGEIVLGGMTR           | heat shock protein 9A [Mus musculus]                                                      | 1446.7639                                                               | 57.28     | 1.039691279 |             |
| 25141330 | SDPFLEFFR               | copine I [Mus musculus]                                                                   | 1157.5713                                                               | 31.1      | 0.523050802 |             |
| 6679567  | SDQVNGVLVLSLLDK         | polymerase I and transcript release factor [Mus musculus]                                 | 1599.892                                                                | 86.79     | 0           |             |
| 58037546 | SDYLNTEFFMDK            | isocitrate dehydrogenase 1 (NADP+), soluble [Mus musculus]                                | 1509.6593                                                               | 73.57     | 0           |             |
| 9845257  | SEAAPAAPAAAPAEK         | histone 1, H1c [Mus musculus]                                                             | 1448.7404                                                               | 61.24     | 0.618906531 |             |
| 31982236 | SEDEVGSLIEYFR           | integrin alpha 6 [Mus musculus]                                                           | 1672.7723                                                               | 27.39     | 0           |             |
| 63738313 | SEDGVEGLGETQSR          | PREDICTED: similar to AHNAK [Mus musculus]                                                | 1578.6923                                                               | 57.96     | 0.273749239 |             |
| 6753498  | SEDYAFPTYADR            | cytochrome c oxidase subunit IV isoform 1 [Mus musculus]                                  | 1434.6207                                                               | 68.13     | 0.410892641 |             |
| 31982275 | SEESEPMETDQNAKEEEK      | heat shock protein 4 [Mus musculus]                                                       | 2254.9272                                                               | 33.53     | 0           |             |
| 31982290 | SEGDTAYGQQVQPNNTWK      | LIM domain containing preferred translocation partner in lipoma [Mus musculus]            | 1908.8748                                                               | 107.91    | 0.233263967 |             |
| 6753060  | SEIDLFNIR               | annexin A5 [Mus musculus]                                                                 | 1106.5818                                                               | 40.58     | 0           |             |
| 15809004 | SEILDESMTYDNR           | cyclin M4 [Mus musculus]                                                                  | 1687.7157                                                               | 35.43     | 0           |             |
| 13385340 | SELVAMLEEEELR           | ADP-ribosylation factor-like 1 [Mus musculus]                                             | 1547.7649                                                               | 39.79     | 0.435273078 |             |
| 6755817  | SELVANNVTLPAGEQR        | thymopoietin [Mus musculus]                                                               | 1697.8843                                                               | 85.37     | 0.293737199 |             |
| 6755963  | SENGLEFTSSGSANTETTK     | voltage-dependent anion channel 1 [Mus musculus]                                          | 1959.8789                                                               | 132.44    | 0.282118267 |             |
| 6679687  | SEPIPESNEGPVK           | glucose regulated protein [Mus musculus]                                                  | 1382.6735                                                               | 78.46     | 0.311324989 |             |
| 6755566  | SEQAEPPAAADTHEAGDQNEAEK | solute carrier family 9 (sodium/hydrogen exchanger), isoform 3 regulator 1 [Mus musculus] | 2395.0352                                                               | 61.54     | 0.293287913 |             |
| 51768458 | SEQPVDLIQIFR            | PREDICTED: similar to mKIAA0177 protein [Mus musculus]                                    | 1444.7791                                                               | 23.49     | 0.753054201 |             |
| 13430890 | SETAPAAPAAPAEK          | histone 1, H1e [Mus musculus]                                                             | 1478.7467                                                               | 59.45     | 0           |             |
| 34328365 | SETAPAAPAAPAPVEK        | histone 1, H1d [Mus musculus]                                                             | 1506.7817                                                               | 58.29     | 3.742245112 |             |
| 21426893 | SETAPAETAAPAPVEK        | histone 1, H1b [Mus musculus]                                                             | 1568.778                                                                | 38.42     | 0           |             |
| 6671690  | SETITEEELVGLMNK         | carbonyl reductase 1 [Mus musculus]                                                       | 1692.8429                                                               | 37.36     | 0           |             |
| 7304889  | SETSGSFEDALLAIVK        | annexin A4 [Mus musculus]                                                                 | 1666.8507                                                               | 53.25     | 0.352361187 |             |
| 31982122 | SFDPFTEVIVDGVIVANALR    | phospholipase C, beta 3 [Mus musculus]                                                    | 2063.0798                                                               | 30.03     | 0.292087293 |             |
| 45598381 | SFEDTIAQGITFVK          | thioredoxin domain containing 5 [Mus musculus]                                            | 1555.7906                                                               | 59.19     | 0.498779949 |             |
| 21314832 | SFENSLGINVPR            | UDP-glucose pyrophosphorylase 2 [Mus musculus]                                            | 1332.6888                                                               | 69.88     | 0.407480161 |             |
| 13384736 | SFEWLSQMR               | dynein, cytoplasmic, heavy chain 1 [Mus musculus]                                         | 1183.5625                                                               | 34.92     | 0.454722776 |             |
| 50080209 | SFFPEEISSMVLTK          | heat shock protein 1A [Mus musculus]                                                      | 1614.8057                                                               | 43.52     | 0           |             |

|          |                               |                  |                                                                                                    |           |        |             |
|----------|-------------------------------|------------------|----------------------------------------------------------------------------------------------------|-----------|--------|-------------|
| 63664040 | SFFSEIISISDVK                 |                  | PREDICTED: alpha isoform of regulatory subunit B55, protein phosphatase 2 [Mus musculus]           | 1558.7942 | 45.25  | 0.530806817 |
| 51767507 | SFGGGTGSFTSLLMER              |                  | PREDICTED: similar to tubulin, alpha-like 3 [Mus musculus]                                         | 1703.8086 | 40.84  | 0           |
| 63723778 | SFITTDVNPYYDSFVR              |                  | PREDICTED: leucyl-tRNA synthetase [Mus musculus]                                                   | 1923.9183 | 56.67  | 0.581662428 |
| 6753620  | SFLDLLLNATGK                  |                  | DEAD/H (Asp-Glu-Ala-Asp/His) box polypeptide 3, X-linked [Mus musculus]                            | 1291.7205 | 70.28  | 0.39924443  |
| 7110713  | SFQNYIR                       | Deamidation (NQ) | RAS p21 protein activator 3 [Mus musculus]                                                         | 928.4548  | 25.33  | 0           |
| 51770896 | SFVQNYPVVSIEDPFDQDDWGAWQK     |                  | PREDICTED: similar to Alpha enolase (2-phospho-D-glycerate hydro-lyase) (Non-neural enolase) (NNE) | 2970.376  | 79.73  | 0.318958395 |
| 31981690 | SFYPEEVSSMLTK                 |                  | heat shock protein 8 [Mus musculus]                                                                | 1616.7872 | 67.24  | 0           |
| 28916693 | SGALNSNDAFLVK                 |                  | gelsolin [Mus musculus]                                                                            | 1335.6862 | 40.53  | 0.503490634 |
| 19527048 | SGAYSAGYGGYEYSGLSDGYGFTTDLFGR |                  | heterogeneous nuclear ribonucleoprotein F [Mus musculus]                                           | 3147.3894 | 76.53  | 0.307905859 |
| 51873060 | SGDAAIVDMVPGKPMCVESFSDYPLGR   |                  | eukaryotic translation elongation factor 1 alpha 1 [Mus musculus]                                  | 2938.3813 | 31.78  | 0.406578109 |
| 7304879  | SGDNDFPVNEQ GK                |                  | aldo-keto reductase family 1, member C13 [Mus musculus]                                            | 1406.6202 | 22.98  | 0.697303938 |
| 47058964 | SGDSEVYQMGDVSQK               |                  | single-stranded DNA binding protein 1 isoform 2 [Mus musculus]                                     | 1629.7156 | 40.37  | 0.758524184 |
| 6755787  | SGEGEVSGLLR                   |                  | tripartite motif protein 28 [Mus musculus]                                                         | 1103.5664 | 23.25  | 0           |
| 31980726 | SGEHDFGAAFDGDGDR              |                  | phosphoglucomutase 2 [Mus musculus]                                                                | 1652.665  | 93.22  | 0.243678955 |
| 23956084 | SGELAVQALDQFATVVEAK           |                  | acyl-Coenzyme A dehydrogenase, very long chain [Mus musculus]                                      | 1976.0018 | 60.57  | 0.427468186 |
| 7305027  | SGETEDTFIADLVVGLCTGQIK        |                  | enolase 2, gamma neuronal [Mus musculus]                                                           | 2296.1382 | 103.18 | 0.586420629 |
| 6679651  | SGETEDTFIADLVVGLCTGQIK        |                  | enolase 3, beta muscle [Mus musculus]                                                              | 2296.1382 | 103.18 | 0.586420629 |
| 51770896 | SGETEDTFIADLVVGLCTGQIK        |                  | PREDICTED: similar to Alpha enolase (2-phospho-D-glycerate hydro-lyase) (Non-neural enolase) (NNE) | 2296.1382 | 103.18 | 0.586420629 |
| 6680618  | SGEYPPFLIK                    |                  | acetyl-Coenzyme A dehydrogenase, medium chain [Mus musculus]                                       | 1150.6221 | 25.73  | 0           |
| 29293809 | SGGMSNELNIIISR                |                  | ATP citrate lyase [Mus musculus]                                                                   | 1491.7247 | 40.56  | 0           |
| 6679793  | SGIGTGDEPGQGLNGEAGPEDPSR      |                  | protein phosphatase 1G (formerly 2C), magnesium-dependent, gamma isoform [Mus musculus]            | 2394.0928 | 78.43  | 0.282781547 |
| 6680970  | SGLGSVGLMPPGSVGVGPR           | Oxidation (M)    | procollagen, type V, alpha 2 [Mus musculus]                                                        | 1867.9666 | 30.23  | 0           |
| 40254244 | SGSMDSMSTENNSQLR              |                  | loss of heterozygosity, 11, chromosomal region 2, gene A homolog [Mus musculus]                    | 1840.7834 | 26.4   | 0           |
| 19526822 | SGTTWMSIEMMIYQGGK             |                  | sulfotransferase family 1A, phenol-preferring, member 1 [Mus musculus]                             | 2034.9255 | 28.89  | 0           |
| 41152517 | SIAFPSIGSGR                   |                  | H2A histone family, member Y [Mus musculus]                                                        | 1091.5839 | 24.09  | 0.423553268 |
| 29244556 | SIGESVPEPR                    |                  | GDP-mannose pyrophosphorylase B [Mus musculus]                                                     | 1070.5514 | 32.93  | 0.286484048 |
| 19527294 | SIGVSNFNFR                    |                  | aldo-keto reductase family 1, member C14 [Mus musculus]                                            | 1140.5817 | 25.47  | 0.242609072 |
| 63645619 | SIGVSNFNSR                    |                  | PREDICTED: hypothetical protein XP_621309 [Mus musculus]                                           | 1080.5439 | 24.54  | 0.67914524  |
| 41322904 | SIITYVSSLYDAMPR               |                  | plectin 1 isoform 1 [Mus musculus]                                                                 | 1715.8718 | 29.48  | 1.014764    |
| 6755863  | SILFVPTSAPR                   |                  | tumor rejection antigen gp96 [Mus musculus]                                                        | 1187.6813 | 54.32  | 0.485288719 |
| 31981828 | SILLSVPLLVDNFK                |                  | coatamer protein complex subunit alpha [Mus musculus]                                              | 1509.9242 | 51.14  | 1.15470513  |
| 31981690 | SINPDEAVAYGAAVQAAAILSGDK      |                  | heat shock protein 8 [Mus musculus]                                                                | 2260.1479 | 140.96 | 0.485278737 |
| 6754206  | SIPDGTEHGDFLALDLGGTNFR        |                  | hexokinase 1 [Mus musculus]                                                                        | 2332.1084 | 37.55  | 0           |
| 31982030 | SIQEIQLDKDDESRLR              |                  | Rho GDP dissociation inhibitor (GDI) alpha [Mus musculus]                                          | 1917.9414 | 68.49  | 0.397474557 |
| 34740335 | SIQFVDWCPTGFK                 |                  | tubulin, alpha 2 [Mus musculus]                                                                    | 1527.7308 | 67.26  | 0.404049443 |
| 6678467  | SIQFVDWCPTGFK                 |                  | tubulin, alpha 4 [Mus musculus]                                                                    | 1527.7308 | 67.26  | 0.404049443 |
| 38090003 | SISTSLPVLDLIDAIAPNAVR         |                  | PREDICTED: expressed sequence AI427122 [Mus musculus]                                              | 2165.217  | 64.63  | 0.560192094 |
| 31981657 | SIVNNGHSHFNVEFDDSQDNAVLK      |                  | carbonic anhydrase 2 [Mus musculus]                                                                | 2549.2043 | 115.71 | 0.145589774 |
| 40556608 | SIYYITGESK                    |                  | heat shock protein 1, beta [Mus musculus]                                                          | 1160.5781 | 34.92  | 0           |
| 64427157 | SLASVPQQNGFSGVSETAGAQ         |                  | PREDICTED: synaptopodin 2 [Mus musculus]                                                           | 2191.0781 | 90.09  | 0           |
| 63476037 | SLDEVSQPAQELKR                |                  | PREDICTED: procollagen, type VI, alpha 3 [Mus musculus]                                            | 1599.8325 | 25.82  | 0           |
| 13624315 | SLDMDGIIAEVR                  |                  | keratin complex 2, basic, gene 8 [Mus musculus]                                                    | 1318.6627 | 55.94  | 0           |
| 63565108 | SLDMDGIIAEVR                  |                  | PREDICTED: similar to cytokeratin EndoA - mouse [Mus musculus]                                     | 1318.6627 | 55.94  | 0           |
| 63487095 | SLDNNYSTLNER                  |                  | PREDICTED: catenin src [Mus musculus]                                                              | 1425.6648 | 29.2   | 0.715849508 |
| 7305295  | SLEADLMQLQEDLAAAER            |                  | myosin, heavy polypeptide 11, smooth muscle [Mus musculus]                                         | 2002.9786 | 101.15 | 0           |
| 7305295  | SLEADLMQLQEDLAAAER            | Oxidation (M)    | myosin, heavy polypeptide 11, smooth muscle [Mus musculus]                                         | 2018.9642 | 69.25  | 0.119111771 |
| 31981302 | SLEDALSSDTSGHFR               |                  | annexin A6 [Mus musculus]                                                                          | 1621.7476 | 68.19  | 0           |
| 51717092 | SLEEIYLSPLIK                  |                  | PREDICTED: similar to 40S ribosomal protein S2 [Mus musculus]                                      | 1551.8691 | 62.97  | 0.508185267 |
| 20373163 | SLEELLLDANQLR                 |                  | PDZ-domain protein scribble [Mus musculus]                                                         | 1513.8252 | 39.45  | 0           |
| 6678331  | SLESGEDLNFIIVSTGPQPSGAR       |                  | transglutaminase 3, E polypeptide [Mus musculus]                                                   | 2420.158  | 147.52 | 0.075910711 |
| 6754556  | SLETENSALQLQVTER              |                  | lamin B1 [Mus musculus]                                                                            | 1817.924  | 92.48  | 0           |
| 46275826 | SLFPVVLEQLDDYNAK              |                  | laminin, alpha 4 [Mus musculus]                                                                    | 1850.947  | 24.57  | 0           |
| 7304887  | SLGDDISSETSGDFR               |                  | annexin A3 [Mus musculus]                                                                          | 1585.7102 | 62.51  | 0           |
| 31560656 | SLGYAYVNFQQPADAER             |                  | poly A binding protein, cytoplasmic 1 [Mus musculus]                                               | 1928.9188 | 88.35  | 0.441616853 |
| 63622083 | SLGYAYVNFQQPADAER             |                  | PREDICTED: similar to Poly(A) binding protein, cytoplasmic 4, isoform 1 [Mus musculus]             | 1928.9188 | 88.35  | 0.441616853 |
| 41322904 | SLLAWQSLSR                    |                  | plectin 1 isoform 1 [Mus musculus]                                                                 | 1160.6405 | 32.93  | 0           |
| 7304879  | SLLDVTDFCDTWER                |                  | aldo-keto reductase family 1, member C13 [Mus musculus]                                            | 1699.7772 | 50.25  | 0.339128782 |
| 6680606  | SLLLEGQEAHYNNLPTPK            |                  | keratin complex 1, acidic, gene 19 [Mus musculus]                                                  | 1910.9608 | 82.15  | 0.378926132 |
| 7106407  | SLLNEIESIYDER                 |                  | transcriptional regulator, SIN3A [Mus musculus]                                                    | 1580.7811 | 31.89  | 0           |
| 12963539 | SLLPGCQSVISR                  |                  | ETHE1 protein [Mus musculus]                                                                       | 1259.6809 | 33.21  | 0           |

|          |                             |                  |                                                                                                     |           |        |             |
|----------|-----------------------------|------------------|-----------------------------------------------------------------------------------------------------|-----------|--------|-------------|
| 29244176 | SLNLDSIIAEVK                | Deamidation (NQ) | hypothetical protein 4732456N10 [Mus musculus]                                                      | 1302.7126 | 85.98  | 0           |
| 47086911 | SLNNQFASFIDK                |                  | keratin Kb40 [Mus musculus]                                                                         | 1383.6934 | 50.04  | 0           |
| 1346343  | SLNNQFASFIDK                |                  | Keratin, type II cytoskeletal 1 (Cytokeratin 1) (K1) (CK 1) (67 kDa cytokeratin) (Hair alpha protei | 1383.6934 | 50.04  | 0           |
| 6754524  | SLNPELGTADADKEQWVK          |                  | lactate dehydrogenase 1, A chain [Mus musculus]                                                     | 1830.8873 | 87.31  | 0.403399769 |
| 33859811 | SLNSEMDNILANLR              |                  | hydroxyacyl-Coenzyme A dehydrogenase/3-ketoacyl-Coenzyme A thiolase/enoyl-Coenzyme A hydratase (tri | 1589.7992 | 91.74  | 0           |
| 33859811 | SLNSEMDNILANLR              | Oxidation (M)    | hydroxyacyl-Coenzyme A dehydrogenase/3-ketoacyl-Coenzyme A thiolase/enoyl-Coenzyme A hydratase (tri | 1605.7866 | 35.14  | 0.699984131 |
| 51709154 | SLPADILYEDQQCLVFR           |                  | PREDICTED: histidine triad nucleotide binding protein 2 [Mus musculus]                              | 2010.0029 | 22.71  | 0           |
| 51706331 | SLQGLAGEIVGEVR              |                  | PREDICTED: hypothetical protein LOC67809 [Mus musculus]                                             | 1427.7896 | 37.18  | 0           |
| 6680572  | SLSALGNVISALAEGSTYVYPR      |                  | kinesin family member 5B [Mus musculus]                                                             | 2268.1831 | 50.36  | 0.615219782 |
| 28395023 | SLSDALISLQMVYPR             |                  | NCK-associated protein 1 [Mus musculus]                                                             | 1692.8992 | 22.97  | 0.81298834  |
| 21592285 | SLSSSSQGPALSMGSLYR          |                  | keratin 20 [Mus musculus]                                                                           | 1914.9247 | 32.61  | 0           |
| 27754118 | SLYSASISLNNPMDK             | Oxidation (M)    | asporin [Mus musculus]                                                                              | 1600.8055 | 42.08  | 0           |
| 31982755 | SLYSSSPGGAYVTR              |                  | vimentin [Mus musculus]                                                                             | 1444.7086 | 81.41  | 0.353631982 |
| 6996913  | SLYYYYIQDTK                 |                  | annexin A2 [Mus musculus]                                                                           | 1421.693  | 34.39  | 1.074531508 |
| 22267442 | SMAASGNLGHPTFLDEL           |                  | ubiquinol cytochrome c reductase core protein 2 [Mus musculus]                                      | 1759.8433 | 24.83  | 0           |
| 20137006 | SMAEAMIQLEELAAER            |                  | myosin, heavy polypeptide 9, non-muscle [Mus musculus]                                              | 2048.9653 | 76.55  | 0.495438299 |
| 63487095 | SMGYDDLDYGMMSDYGTAR         |                  | PREDICTED: catenin src [Mus musculus]                                                               | 2147.8552 | 84.4   | 0           |
| 22122825 | SMLEVNYPMEINGIVR            |                  | actin-related protein 2 [Mus musculus]                                                              | 1751.8578 | 27.77  | 0           |
| 9790051  | SNCNVAVINVGAPAAAGMNAAVR     |                  | phosphofructokinase, platelet [Mus musculus]                                                        | 2099.0518 | 64.73  | 1.020559445 |
| 50355692 | SNEDQSMGNWQIR               |                  | lamin A isoform A [Mus musculus]                                                                    | 1564.6853 | 90.04  | 0           |
| 31560653 | SNFLAILNVGAPAAAGMNAAVR      |                  | phosphofructokinase, liver, B-type [Mus musculus]                                                   | 2144.1299 | 63.23  | 0           |
| 31982275 | SNLAYDIVQLPPLTGTGIK         |                  | heat shock protein 4 [Mus musculus]                                                                 | 1903.0509 | 68.85  | 0.260737861 |
| 6681291  | SNLVDNTNQVEVLQR             |                  | Ddx19-like protein [Mus musculus]                                                                   | 1728.8889 | 71.15  | 0           |
| 33469063 | SNLVGMGVIPLELPGETADSLGLTGR  |                  | aconitase 1 [Mus musculus]                                                                          | 2759.4199 | 54.98  | 0.203927728 |
| 13624315 | SNMDNMFESYINNLR             |                  | keratin complex 2, basic, gene 8 [Mus musculus]                                                     | 1847.8153 | 86.48  | 0           |
| 63565108 | SNMDNMFESYINNLR             |                  | PREDICTED: similar to cytokeratin EndoA - mouse [Mus musculus]                                      | 1847.8153 | 86.48  | 0           |
| 13624315 | SNMDNMFESYINNLR             | 2 Oxidation (M)  | keratin complex 2, basic, gene 8 [Mus musculus]                                                     | 1879.79   | 36.64  | 0.558914903 |
| 63565108 | SNMDNMFESYINNLR             | 2 Oxidation (M)  | PREDICTED: similar to cytokeratin EndoA - mouse [Mus musculus]                                      | 1879.79   | 36.64  | 0.558914903 |
| 13624315 | SNMDNMFESYINNLR             | Deamidation (NQ) | keratin complex 2, basic, gene 8 [Mus musculus]                                                     | 1848.7959 | 39.58  | 0           |
| 63565108 | SNMDNMFESYINNLR             | Deamidation (NQ) | PREDICTED: similar to cytokeratin EndoA - mouse [Mus musculus]                                      | 1848.7959 | 39.58  | 0           |
| 13624315 | SNMDNMFESYINNLR             | Oxidation (M)    | keratin complex 2, basic, gene 8 [Mus musculus]                                                     | 1863.8035 | 50.24  | 0           |
| 63565108 | SNMDNMFESYINNLR             | Oxidation (M)    | PREDICTED: similar to cytokeratin EndoA - mouse [Mus musculus]                                      | 1863.8035 | 50.24  | 0           |
| 10946928 | SNNVEMDWVLK                 |                  | heterogeneous nuclear ribonucleoprotein H1 [Mus musculus]                                           | 1334.6482 | 55.21  | 0           |
| 6679505  | SNPENNVLGLTLANDCEVLTLTPTDGR |                  | proteasome 26S non-ATPase subunit 4 [Mus musculus]                                                  | 2957.4534 | 24.88  | 0.64898384  |
| 21450277 | SPDFTNENPLETR               |                  | Na+/K+ -ATPase alpha 1 subunit [Mus musculus]                                                       | 1519.7064 | 97.74  | 0.327063883 |
| 8394024  | SPDTNLYFMGDYVDR             |                  | protein phosphatase 2a, catalytic subunit, beta isoform [Mus musculus]                              | 1792.7953 | 34.94  | 0           |
| 7710042  | SPDVGLYGIPECGETYQSDLAELAK   |                  | IQ motif containing GTPase activating protein 1 [Mus musculus]                                      | 2641.241  | 30.98  | 0           |
| 9790167  | SPESQLFSIEDIQEVR            |                  | phospholipase C, delta 1 [Mus musculus]                                                             | 1876.9362 | 46.55  | 0.883513547 |
| 6679761  | SPFETDMLTLTR                |                  | fructose biphosphatase 2 [Mus musculus]                                                             | 1410.6935 | 69.63  | 0           |
| 31980969 | SPFLQVFNNSPDESSYYR          |                  | SEC23B [Mus musculus]                                                                               | 2149.9878 | 56.65  | 0.345594876 |
| 63746482 | SPFSVGVSPSLDLSK             |                  | PREDICTED: filamin, alpha [Mus musculus]                                                            | 1519.7955 | 105.75 | 0           |
| 28916673 | SPLDSTAEPPIAVR              |                  | SEC24 related gene family, member C [Mus musculus]                                                  | 1339.6858 | 29.46  | 0.582471074 |
| 31981555 | SPPSSAEQSTPAPPTK            |                  | ladinin [Mus musculus]                                                                              | 1581.7815 | 52.27  | 0.570625404 |
| 51766377 | SPQSFDDTTPSGR               |                  | PREDICTED: ATP-binding cassette, sub-family C (CFTR/MRP), member 3 [Mus musculus]                   | 1426.6635 | 29.25  | 0           |
| 37620153 | SPSEGGNSAEVLNVK             | Deamidation (NQ) | myosin, light polypeptide kinase telokin isoform [Mus musculus]                                     | 1602.759  | 25.48  | 0           |
| 31541815 | SPTGLTLGSLVDEIQR            |                  | L-specific multifunctional beta-oxidation protein [Mus musculus]                                    | 1685.8984 | 36.47  | 0           |
| 33859560 | SPYLPLYGLGELPQGFAR          |                  | guanosine diphosphate (GDP) dissociation inhibitor 1 [Mus musculus]                                 | 2141.1089 | 54.37  | 0.366184729 |
| 56119103 | SPYLPLYGLGELPQGFAR          |                  | guanosine diphosphate (GDP) dissociation inhibitor 3 [Mus musculus]                                 | 2141.1089 | 54.37  | 0.366184729 |
| 63746482 | SPYTVTVGQACNPAACR           |                  | PREDICTED: filamin, alpha [Mus musculus]                                                            | 1737.817  | 28.42  | 0           |
| 31982472 | SQDAEVDGTTSTVLLAAEFLK       |                  | chaperonin subunit 7 (eta) [Mus musculus]                                                           | 2252.1301 | 73.46  | 0           |
| 12746446 | SQDVGFWEGEIVVR              |                  | epithelial protein lost in neoplasm [Mus musculus]                                                  | 1507.7174 | 82.21  | 0           |
| 31791057 | SQECYFDPELYR                |                  | laminin, gamma 1 [Mus musculus]                                                                     | 1549.6638 | 28.83  | 0           |
| 7305169  | SQFEELCAELLQK               |                  | heat shock protein 105 [Mus musculus]                                                               | 1537.7531 | 34.44  | 0.782132414 |
| 51768600 | SQFFEQGSSDSVAPDLVPPTLSAPSR  |                  | PREDICTED: LIM domain only 7 [Mus musculus]                                                         | 2719.3403 | 37.25  | 0.578202781 |
| 18079339 | SQFTITPGSEQIR               |                  | aconitase 2, mitochondrial [Mus musculus]                                                           | 1463.7506 | 61.31  | 0.325616577 |
| 22094115 | SQGDMQDLNGNNSQSVTR          |                  | signal transducer and activator of transcription 3 isoform 3 [Mus musculus]                         | 1863.8499 | 26.4   | 0.387102362 |
| 22094115 | SQGDMQDLNGNNSQSVTR          | Oxidation (M)    | signal transducer and activator of transcription 3 isoform 3 [Mus musculus]                         | 1879.826  | 38.28  | 0.568158952 |
| 6678331  | SQGVFQCQPASVNAIK            |                  | transglutaminase 3, E polypeptide [Mus musculus]                                                    | 1605.8002 | 79.27  | 0           |
| 31981722 | SQIFSTASDNQPTVTIK           |                  | heat shock 70kD protein 5 (glucose-regulated protein) [Mus musculus]                                | 1836.9283 | 89.33  | 0.516119174 |
| 31981690 | SQIHIVLVGGSTR               |                  | heat shock protein 8 [Mus musculus]                                                                 | 1481.809  | 63.82  | 0           |

|          |                           |                                                                               |           |        |             |
|----------|---------------------------|-------------------------------------------------------------------------------|-----------|--------|-------------|
| 6677871  | SQLIVVEEGSEPSSELMK        | scinderin [Mus musculus]                                                      | 1874.9402 | 67.85  | 0           |
| 21703972 | SQLYDDLMDFEMK             | malic enzyme 2, NAD(+)-dependent, mitochondrial [Mus musculus]                | 1634.7275 | 47.61  | 0           |
| 47059123 | SQEQEGILPLLDSPAK          | UDP glucuronosyltransferase 1 family, polypeptide A10 [Mus musculus]          | 1652.8821 | 58.62  | 1.572173902 |
| 19882199 | SQSNESAGSQVGTFFK          | RAN binding protein 2 [Mus musculus]                                          | 1655.7454 | 24.98  | 0.317112886 |
| 63487095 | SQSSHSYDDSTLPLIDR         | PREDICTED: catenin src [Mus musculus]                                         | 1920.8914 | 26.36  | 0.338355402 |
| 63476037 | SQSSVLEAIR                | PREDICTED: procollagen, type VI, alpha 3 [Mus musculus]                       | 1089.5852 | 44.09  | 0           |
| 6754558  | SQTNWGPGEFSR              | lamin B2 [Mus musculus]                                                       | 1365.6226 | 27.22  | 0           |
| 41322904 | SQVEEELFSVR               | plectin 1 isoform 1 [Mus musculus]                                            | 1322.6599 | 31.38  | 0           |
| 54607037 | SQVSPQGLQVR               | integrin beta 4 isoform 2 [Mus musculus]                                      | 1198.6317 | 28.08  | 0.489394173 |
| 547749   | SQYEQLAEQNR               | Keratin, type I cytoskeletal 10 (Cytokeratin 10) (K10) (CK 10)                | 1365.6462 | 47.86  | 0           |
| 30424882 | SRFIQLVR                  | hypothetical protein LOC76608 [Mus musculus]                                  | 1018.5965 | 22.9   | 0           |
| 26986563 | SSDPTAVVDAQTK             | choline dehydrogenase [Mus musculus]                                          | 1318.6411 | 46.25  | 2.974044137 |
| 6671666  | SSEMNVLIPTEGGDFNEFPVPEQFK | CAP, adenylate cyclase-associated protein 1 [Mus musculus]                    | 2811.3416 | 68.31  | 0.351876957 |
| 63738313 | SSEVLSGDDEDYQR            | PREDICTED: similar to AHNAK [Mus musculus]                                    | 1698.7493 | 96.94  | 0.448573153 |
| 6755040  | SSFFVNLTLGGQK             | profilin 1 [Mus musculus]                                                     | 1454.7578 | 79.14  | 0.392306719 |
| 58037465 | SSGEIVYCGQVFEK            | Ribosomal protein L18A [Mus musculus]                                         | 1545.7222 | 24.72  | 0           |
| 31559916 | SSGSPYGGYSGGGGGGGYGR      | heterogeneous nuclear ribonucleoprotein A3 isoform b [Mus musculus]           | 1910.799  | 161.41 | 0.552479208 |
| 8394258  | SSGSQVPGPPAPAR            | semaF cytoplasmic domain associated protein 2 [Mus musculus]                  | 1364.6976 | 23.12  | 0           |
| 136429   | SSGSSYPSLLQCLK            | Trypsin precursor                                                             | 1469.7264 | 87.18  | 0           |
| 12083691 | SSGTGASVGGPPQPSDQDTLVQR   | PDZ and LIM domain 5 isoform ENH1 [Mus musculus]                              | 2184.0562 | 79.96  | 0.328336012 |
| 6755354  | SSITPGTVLIILTGR           | ribosomal protein L6 [Mus musculus]                                           | 1527.9081 | 44.94  | 0.509097453 |
| 22779912 | SLLDLLLTESTEDMAQR         | dynamitin 1-like [Mus musculus]                                               | 1922.9061 | 45.84  | 0           |
| 46195798 | SSLNPILFR                 | dolichyl-di-phosphooligosaccharide-protein glycotransferase [Mus musculus]    | 1046.5996 | 32.94  | 0           |
| 63489759 | SSLSSAQADFNLQALDR         | PREDICTED: spectrin alpha 2 [Mus musculus]                                    | 1951.9333 | 54.14  | 0.331133591 |
| 15147224 | SSMSVTSLEDELQASIQR        | sideroflexin 1 [Mus musculus]                                                 | 1980.9586 | 41.89  | 0           |
| 8567338  | SSPEPVALTESEYEVIR         | coatamer protein complex, subunit gamma [Mus musculus]                        | 2007.0005 | 73.05  | 0           |
| 46849812 | SSPVIIDASTAIDAPSCLR       | fibronectin 1 [Mus musculus]                                                  | 1927.0095 | 23.3   | 0           |
| 40068493 | SSQSQQQFSGIGR             | DEAD box polypeptide 17 isoform 1 [Mus musculus]                              | 1455.6885 | 26.01  | 0           |
| 63481281 | SSSNTVESTSLYNK            | PREDICTED: glutamyl-prolyl-tRNA synthetase [Mus musculus]                     | 1516.7046 | 22.33  | 1.282418738 |
| 31559891 | SSTFWLR                   | mitochondrial Rho 1 [Mus musculus]                                            | 896.4514  | 28.71  | 0.307066128 |
| 6755817  | SSTPLTVSSAENR             | thymopoietin [Mus musculus]                                                   | 1633.806  | 57.05  | 0           |
| 31981690 | STAGDTHLGGEDFDNR          | heat shock protein 8 [Mus musculus]                                           | 1691.7345 | 106.4  | 0.502442607 |
| 33859482 | STAISLFYELSENDLNFIK       | eukaryotic translation elongation factor 2 [Mus musculus]                     | 2204.1094 | 120.95 | 0.363847817 |
| 30841021 | STELDSNWQWFLQR            | ADP-ribosylation factor GTPase activating protein 3 [Mus musculus]            | 1768.8352 | 30.32  | 0.375140462 |
| 33186863 | STESLQANVQR               | ribosomal protein L13 [Mus musculus]                                          | 1232.6285 | 27.11  | 0.371696119 |
| 42734399 | STETMIGEMINLGLK           | desmuslin isoform H [Mus musculus]                                            | 1636.8292 | 43.24  | 1.244533822 |
| 46559834 | STETMIGEMINLGLK           | desmuslin isoform M [Mus musculus]                                            | 1636.8292 | 43.24  | 1.244533822 |
| 10946928 | STGEAFVQFASQEAIEK         | heterogeneous nuclear ribonucleoprotein H1 [Mus musculus]                     | 1841.8896 | 67.67  | 0           |
| 9845253  | STGEAFVQFASQEAIEK         | heterogeneous nuclear ribonucleoprotein H2 [Mus musculus]                     | 1841.8896 | 67.67  | 0           |
| 6679583  | STIGVEFATR                | RAB11B, member RAS oncogene family [Mus musculus]                             | 1080.5702 | 25.68  | 0.520624216 |
| 6754816  | STLINSFLTLTDLYPER         | septin 2 [Mus musculus]                                                       | 1881.9922 | 38.72  | 0.238896432 |
| 31981549 | STLSVIPSGVQWQDR           | sulfide quinone reductase-like [Mus musculus]                                 | 1785.9574 | 54.42  | 0.48168957  |
| 6754256  | STNGDTFLGGEDFDQALLR       | heat shock protein 9A [Mus musculus]                                          | 2055.9673 | 126.1  | 0.457183878 |
| 6754256  | STNGDTFLGGEDFDQALLR       | heat shock protein 9A [Mus musculus]                                          | 2056.9612 | 120.51 | 0.415288512 |
| 30425112 | STPEDQILYQTER             | hypothetical protein LOC109154 [Mus musculus]                                 | 1579.7622 | 55.74  | 0.415318959 |
| 8567336  | STWEVIQESDFK              | chloride channel calcium activated 3 [Mus musculus]                           | 1597.7357 | 72.94  | 0.107384373 |
| 31980953 | SVAEISPDLIQFSR            | hydroxyacid oxidase (glycolate oxidase) 3 [Mus musculus]                      | 1561.818  | 36.08  | 0.201838052 |
| 51491845 | SVDPTLALSVYLK             | clathrin, heavy polypeptide (Hc) [Mus musculus]                               | 1433.798  | 63.2   | 0.35444315  |
| 6678573  | SVEDLPEGVDPSPR            | villin 1 [Mus musculus]                                                       | 1399.6445 | 37.63  | 0.231471861 |
| 63641940 | SVEEVASEIQPFLLR           | PREDICTED: desmoplakin [Mus musculus]                                         | 1603.8312 | 54.21  | 0.574736332 |
| 19705424 | SVFPEQANNNEWAR            | proteasome 26S non-ATPase subunit 3 [Mus musculus]                            | 1661.7733 | 56.53  | 0.413974643 |
| 50355692 | SVGSGGGSGFGDNLVTR         | lamin A isoform A [Mus musculus]                                              | 1566.7505 | 124.07 | 0.314912894 |
| 19745150 | SVGMIAAGTGITPMLQVIR       | diaphorase 1 [Mus musculus]                                                   | 1901.0355 | 50.93  | 0           |
| 63664018 | SVLAVENLLTLDR             | PREDICTED: kinesin family member 13B [Mus musculus]                           | 1442.8221 | 35.48  | 0           |
| 6677935  | SVLEGGDIPLQGLSGLK         | sorbin and SH3 domain containing 1 [Mus musculus]                             | 1682.9253 | 34.29  | 0           |
| 18875408 | SVLVTSVLNLLEPLDEDLYR      | peroxisomal acyl-CoA thioesterase 1 [Mus musculus]                            | 2175.1421 | 26.66  | 0           |
| 27370510 | SVNDIVVLGPEQFYATR         | paraoxonase 3 [Mus musculus]                                                  | 1907.9863 | 43.79  | 0.555234472 |
| 51491845 | SVNESLNNLFITEEDYQALR      | clathrin, heavy polypeptide (Hc) [Mus musculus]                               | 2355.1477 | 154.25 | 0.44540299  |
| 6753824  | SVPADIFQMATTTR            | fibulin 5 [Mus musculus]                                                      | 1564.7743 | 22.81  | 0           |
| 6678609  | SVPATVDDDDDDNDPENR        | alpha thalassemia/mental retardation syndrome X-linked homolog [Mus musculus] | 1988.8146 | 23.66  | 0.551146383 |

Deamidation (NQ)



|          |                         |                  |                                                                                                         |           |        |             |
|----------|-------------------------|------------------|---------------------------------------------------------------------------------------------------------|-----------|--------|-------------|
| 6678359  | SVPMSTVFYPSDGVATEK      |                  | transketolase [Mus musculus]                                                                            | 1914.9163 | 47.05  | 0           |
| 6678359  | SVPMSTVFYPSDGVATEK      | Oxidation (M)    | transketolase [Mus musculus]                                                                            | 1930.9005 | 22.62  | 0           |
| 63641940 | SVQNDSQALAEVLNQLK       |                  | PREDICTED: desmoplakin [Mus musculus]                                                                   | 1856.9701 | 52.8   | 0           |
| 6753658  | SVSTPSEAGSQDSGDGAVGSR   |                  | dynein, cytoplasmic, intermediate chain 2 [Mus musculus]                                                | 1950.8772 | 32.77  | 0.45307922  |
| 11037800 | SVTLPCTYNTYVSDR         |                  | glycoprotein A33 (transmembrane) [Mus musculus]                                                         | 1718.8066 | 42.1   | 0.329071437 |
| 13385310 | SVTNEDEVTEQLGGAQK       |                  | propionyl Coenzyme A carboxylase, beta polypeptide [Mus musculus]                                       | 1675.816  | 88.29  | 0.180645842 |
| 34328204 | SVTQQPGSEVIAPQK         |                  | valyl-tRNA synthetase 2 [Mus musculus]                                                                  | 1568.8235 | 25.98  | 0.317886571 |
| 51828444 | SVVTEEFNGSDWER          |                  | PREDICTED: proline-rich polypeptide 6 [Mus musculus]                                                    | 1654.7394 | 59.52  | 0.412510165 |
| 6754482  | SVWGGSVGSAGLAGMGGIQTEK  |                  | keratin complex 1, acidic, gene 18 [Mus musculus]                                                       | 2049.0166 | 93.24  | 0           |
| 33563270 | SWDIFFR                 |                  | oxoglutarate dehydrogenase (lipoamide) [Mus musculus]                                                   | 970.4803  | 23.1   | 0.236103362 |
| 31982233 | SWQDELAQQAEEGSAR        |                  | LYRIC [Mus musculus]                                                                                    | 1804.8184 | 97.67  | 0.40838352  |
| 6753138  | SYEAYVLNIR              |                  | Na+/K+ -ATPase beta 1 subunit [Mus musculus]                                                            | 1340.7271 | 47.79  | 0.264160525 |
| 6671507  | SYELPDGQVITIGNER        |                  | actin, alpha 2, smooth muscle, aorta [Mus musculus]                                                     | 1790.8876 | 83.1   | 0.478557643 |
| 6671509  | SYELPDGQVITIGNER        |                  | actin, beta, cytoplasmic [Mus musculus]                                                                 | 1790.8876 | 83.1   | 0.478557643 |
| 30425250 | SYELPDGQVITIGNER        |                  | hypothetical protein LOC238880 [Mus musculus]                                                           | 1790.8876 | 83.1   | 0.478557643 |
| 6671507  | SYELPDGQVITIGNER        | Deamidation (NQ) | actin, alpha 2, smooth muscle, aorta [Mus musculus]                                                     | 1791.8907 | 39.74  | 0.317325341 |
| 6671509  | SYELPDGQVITIGNER        | Deamidation (NQ) | actin, beta, cytoplasmic [Mus musculus]                                                                 | 1791.8907 | 39.74  | 0.317325341 |
| 30425250 | SYELPDGQVITIGNER        | Deamidation (NQ) | hypothetical protein LOC238880 [Mus musculus]                                                           | 1791.8907 | 39.74  | 0.317325341 |
| 57634518 | SYELQESNVR              |                  | septin 11 [Mus musculus]                                                                                | 1224.5892 | 36.79  | 0.343533749 |
| 29568084 | SYIEYLTPPTNTR           |                  | sorting nexin 9 [Mus musculus]                                                                          | 1699.8257 | 44.88  | 0           |
| 38090710 | SYLTPVRDEESQSR          |                  | PREDICTED: protein phosphatase 1, regulatory (inhibitor) subunit 12A [Mus musculus]                     | 1795.8451 | 36.31  | 2.661628676 |
| 38198665 | SYQDPSNAQFLESIR         |                  | p47 protein [Mus musculus]                                                                              | 1754.8373 | 33.29  | 0.405209613 |
| 6996913  | SYSPYDMLSEIK            |                  | annexin A2 [Mus musculus]                                                                               | 1432.6665 | 51.15  | 0           |
| 31791057 | SYYYAISDFAVGGR          |                  | laminin, gamma 1 [Mus musculus]                                                                         | 1568.7561 | 24.51  | 0           |
| 31981549 | TAAAVAAQSGILDR          |                  | sulfide quinone reductase-like [Mus musculus]                                                           | 1343.729  | 62.85  | 0.243563488 |
| 6753620  | TAAFLPILSIYADGPGALR     |                  | DEAD/H (Asp-Glu-Ala-Asp/His) box polypeptide 3, X-linked [Mus musculus]                                 | 2316.2634 | 35.26  | 0           |
| 6753484  | TAEYDVAFGER             |                  | procollagen, type VI, alpha 1 [Mus musculus]                                                            | 1257.5782 | 58.93  | 0.159333128 |
| 31543974 | TAFDEAIAELDTLNEESYK     |                  | tyrosine 3-monooxygenase/tryptophan 5-monooxygenase activation protein, beta polypeptide [Mus musculus] | 2159.0061 | 99.39  | 0.196934653 |
| 6756041  | TAFDEAIAELDTLSEESYK     |                  | tyrosine 3-monooxygenase/tryptophan 5-monooxygenase activation protein, zeta polypeptide [Mus musculus] | 2132      | 136.99 | 0.356662457 |
| 50355692 | TALINSTGEEVAMR          | Oxidation (M)    | lamin A isoform A [Mus musculus]                                                                        | 1507.7319 | 34.23  | 0.264083812 |
| 63489754 | TALLELWELR              |                  | PREDICTED: similar to Spectrin alpha chain, brain (Spectrin, non-erythroid alpha chain) (Alpha-II s     | 1243.7074 | 40.42  | 0.263004919 |
| 6806903  | TASEMVLADDNFSTIVAAVEEGR |                  | ATPase, Ca++ transporting, cardiac muscle, slow twitch 2 [Mus musculus]                                 | 2425.1624 | 57.85  | 0.390068647 |
| 36031132 | TASEMVLADDNFSTIVAAVEEGR |                  | ATPase, Ca++ transporting, fast twitch 1 [Mus musculus]                                                 | 2425.1624 | 57.85  | 0.390068647 |
| 10946940 | TASNVEEAFINTAK          |                  | RAB2, member RAS oncogene family [Mus musculus]                                                         | 1494.7495 | 22.36  | 0           |
| 63489754 | TATDEAYKDPSNLQGK        |                  | PREDICTED: similar to Spectrin alpha chain, brain (Spectrin, non-erythroid alpha chain) (Alpha-II s     | 1737.8328 | 37.33  | 0.294854075 |
| 6677771  | TAVVGVTVTDDVR           |                  | ribosomal protein L18 [Mus musculus]                                                                    | 1331.7159 | 31.89  | 0.688883807 |
| 6671664  | TDAPQPDKDEEGKEEEK       |                  | calnexin [Mus musculus]                                                                                 | 2043.9476 | 27.88  | 0           |
| 6755863  | TDDEVVQREEEAQLDLNASQIR  |                  | tumor rejection antigen gp96 [Mus musculus]                                                             | 2728.3481 | 32.51  | 0.879936867 |
| 56119103 | TDDYLDQPCCTINR          |                  | guanosine diphosphate (GDP) dissociation inhibitor 3 [Mus musculus]                                     | 1785.7461 | 53.87  | 0.329983981 |
| 33859560 | TDDYLDQPCCTINR          |                  | guanosine diphosphate (GDP) dissociation inhibitor 1 [Mus musculus]                                     | 1795.8173 | 58.89  | 0.31587775  |
| 22550094 | TDEHVIDQGDDGNFYVIER     |                  | protein kinase, cAMP dependent regulatory, type II alpha [Mus musculus]                                 | 2337.0283 | 45.15  | 0           |
| 6754034  | TDESQPWVLVVR            |                  | glutamate oxaloacetate transaminase 1, soluble [Mus musculus]                                           | 1525.7961 | 37.57  | 0           |
| 6677805  | TDITYPAGFMDVISIDK       |                  | ribosomal protein S4, X-linked [Mus musculus]                                                           | 1885.9224 | 75.43  | 1.06616154  |
| 6677805  | TDITYPAGFMDVISIDK       | Oxidation (M)    | ribosomal protein S4, X-linked [Mus musculus]                                                           | 1901.9044 | 26.04  | 0.401506868 |
| 63501125 | TDLEELNLGPR             |                  | PREDICTED: ADP-ribosylation factor interacting protein 1 [Mus musculus]                                 | 1256.6592 | 25.18  | 0           |
| 6680606  | TDLEMQIESLKEELAYLK      |                  | keratin complex 1, acidic, gene 19 [Mus musculus]                                                       | 2153.0984 | 35.42  | 0           |
| 6678331  | TDLGPTYNGWQVLDATPQER    |                  | transglutaminase 3, E polypeptide [Mus musculus]                                                        | 2261.0837 | 106.73 | 0.060437676 |
| 6678331  | TDLGPTYNGWQVLDATPQER    | Deamidation (NQ) | transglutaminase 3, E polypeptide [Mus musculus]                                                        | 2262.0659 | 62.77  | 0           |
| 10946574 | TDLNPDNLQGGDDLPNYVLSSR  |                  | creatine kinase, brain [Mus musculus]                                                                   | 2518.1687 | 87.5   | 0           |
| 63476037 | TDLQITINDPR             |                  | PREDICTED: procollagen, type VI, alpha 3 [Mus musculus]                                                 | 1273.64   | 52.67  | 0           |
| 46593021 | TDLTDYLNDR              |                  | ubiquinol-cytochrome c reductase core protein 1 [Mus musculus]                                          | 1110.5394 | 43.05  | 0.605280592 |
| 6755714  | TDMFQTVDLYEKG           |                  | transgelin [Mus musculus]                                                                               | 1546.7131 | 61.76  | 0.636494731 |
| 6754982  | TDSCDVNDCVQVVELLQER     |                  | 3'-phosphoadenosine 5'-phosphosulfate synthase 1 [Mus musculus]                                         | 2293.0735 | 23.13  | 0           |
| 63540743 | TDYYTDNGDGYR            |                  | PREDICTED: filamin C, gamma [Mus musculus]                                                              | 1577.6821 | 51.29  | 0           |
| 13384620 | TDYNASVSPDSSGPER        |                  | heterogeneous nuclear ribonucleoprotein K [Mus musculus]                                                | 1780.802  | 116.57 | 0.395134274 |
| 63540743 | TEAAEIVEGEDSAYSVR       |                  | PREDICTED: filamin C, gamma [Mus musculus]                                                              | 1825.8462 | 84.36  | 0           |
| 6755534  | TEEPESPESVDQTSPTPGDGNPR |                  | solute carrier family 12, member 7 [Mus musculus]                                                       | 2426.0623 | 49.15  | 0.336109507 |
| 6753928  | TEGEEEEEEESPDTGGEYK     |                  | X-ray repair complementing defective repair in Chinese hamster cells 6 [Mus musculus]                   | 2272.8875 | 63.08  | 0           |
| 6753138  | TEISFRPNPK              |                  | Na+/K+ -ATPase beta 1 subunit [Mus musculus]                                                            | 1303.6666 | 24.35  | 1.921030114 |
| 20137006 | TELEDLTSTAQQQLR         |                  | myosin, heavy polypeptide 9, non-muscle [Mus musculus]                                                  | 1919.9185 | 128.83 | 0.601408647 |

|          |                                |               |                                                                                                     |           |        |             |
|----------|--------------------------------|---------------|-----------------------------------------------------------------------------------------------------|-----------|--------|-------------|
| 7305295  | TELEDTLSTATQQELR               |               | myosin, heavy polypeptide 11, smooth muscle [Mus musculus]                                          | 1949.9281 | 124.32 | 0.101480193 |
| 29244560 | TELQGLWINDIVPIGR               |               | hypothetical protein LOC331063 [Mus musculus]                                                       | 1824.0027 | 90.19  | 0.10519198  |
| 31559599 | TELSQSDMFDQQR                  |               | eukaryotic translation termination factor 1 [Mus musculus]                                          | 1456.6486 | 37.57  | 0.837387296 |
| 13624315 | TEMENEFVLIK                    |               | keratin complex 2, basic, gene 8 [Mus musculus]                                                     | 1352.6724 | 70.7   | 0           |
| 63565108 | TEMENEFVLIK                    |               | PREDICTED: similar to cytokeratin EndoA - mouse [Mus musculus]                                      | 1352.6724 | 70.7   | 0           |
| 13624315 | TEMENEFVLIK                    | Oxidation (M) | keratin complex 2, basic, gene 8 [Mus musculus]                                                     | 1368.6658 | 53.28  | 0.300048603 |
| 63565108 | TEMENEFVLIK                    | Oxidation (M) | PREDICTED: similar to cytokeratin EndoA - mouse [Mus musculus]                                      | 1368.6658 | 53.28  | 0.300048603 |
| 6755690  | TEQDLALGTAEGQR                 |               | syntaxin binding protein 3 [Mus musculus]                                                           | 1603.7565 | 45.29  | 0           |
| 6753036  | TEQGPQVDETFQFK                 |               | aldehyde dehydrogenase 2, mitochondrial [Mus musculus]                                              | 1506.7128 | 63.91  | 0.334161441 |
| 31981769 | TEQLTDSSTEISLLPSDIDR           |               | glycerol-3-phosphate dehydrogenase 2 [Mus musculus]                                                 | 2133.0518 | 65.93  | 0.349703012 |
| 46559834 | TEQVTFGGPTAQVEMDLSDTR          |               | desmuslin isoform M [Mus musculus]                                                                  | 2381.1499 | 36.19  | 0           |
| 13195624 | TEVLNYTTPVYLPETIGAHQSGR        |               | NADH dehydrogenase (ubiquinone) 1 alpha subcomplex 10 [Mus musculus]                                | 2772.4204 | 26.87  | 0.347582326 |
| 31981722 | TFAPEEISAMVLTk                 |               | heat shock 70kD protein 5 (glucose-regulated protein) [Mus musculus]                                | 1536.792  | 58.35  | 1.174163031 |
| 31981722 | TFAPEEISAMVLTk                 | Oxidation (M) | heat shock 70kD protein 5 (glucose-regulated protein) [Mus musculus]                                | 1552.7819 | 48.07  | 0           |
| 33859482 | TFCQLILDPIFK                   |               | eukaryotic translation elongation factor 2 [Mus musculus]                                           | 1437.7836 | 41.47  | 0.611238278 |
| 63660302 | TFEMSDFIVDTR                   |               | PREDICTED: filamin B, beta [Mus musculus]                                                           | 1460.6761 | 57.91  | 1.064042564 |
| 6680163  | TFESLVDFCK                     |               | L-3-hydroxyacyl-Coenzyme A dehydrogenase, short chain [Mus musculus]                                | 1188.5697 | 39.33  | 0.261088551 |
| 29789080 | TFEVCDLPVR                     |               | coatomer protein complex, subunit beta 2 (beta prime) [Mus musculus]                                | 1178.5895 | 39.21  | 0.983253637 |
| 30725863 | TFFSFPVAVPFK                   |               | glycyl-tRNA synthetase [Mus musculus]                                                               | 1457.7834 | 44.33  | 0.178967174 |
| 33563250 | TFGGAPGFLSGSPLSPPVFPR          |               | desmin [Mus musculus]                                                                               | 2078.0776 | 115.7  | 0.136029437 |
| 6679078  | TFIAIKPDGVR                    |               | nucleoside-diphosphate kinase 2 [Mus musculus]                                                      | 1344.7637 | 36.87  | 0.435889293 |
| 34328206 | TFIFSDLEYMGQSPGFYR             |               | tryptophanyl-tRNA synthetase [Mus musculus]                                                         | 2157.9961 | 48.75  | 0           |
| 6755152  | TFPLDVGSVVGYSGR                |               | prolyl endopeptidase [Mus musculus]                                                                 | 1553.7915 | 31.41  | 0           |
| 21312260 | TFPTVNPITGEVIGHVAEGDR          |               | aldehyde dehydrogenase 1 family, member B1 [Mus musculus]                                           | 2197.0801 | 46.47  | 0           |
| 63746482 | TFSVWVYPEVTGTHK                |               | PREDICTED: filamin, alpha [Mus musculus]                                                            | 1750.8885 | 52.81  | 0           |
| 6680067  | TFTTQETITNAETAK                |               | glucose phosphate isomerase 1 [Mus musculus]                                                        | 1655.809  | 96.08  | 0.889165018 |
| 21312260 | TFVEESIYR                      |               | aldehyde dehydrogenase 1 family, member B1 [Mus musculus]                                           | 1143.5682 | 54.01  | 0.201326455 |
| 6753036  | TFVQENVYDEFVER                 |               | aldehyde dehydrogenase 2, mitochondrial [Mus musculus]                                              | 1774.8336 | 92.77  | 0.34924423  |
| 6755040  | TFVSITPAEIVGLVVGK              |               | profilin 1 [Mus musculus]                                                                           | 1616.9209 | 84.18  | 0.495860095 |
| 46849812 | TFYQIGDSWEK                    |               | fibronectin 1 [Mus musculus]                                                                        | 1373.6506 | 32.16  | 0           |
| 6680748  | TGAIVDVPGVEELLGR               |               | ATP synthase, H+ transporting, mitochondrial F1 complex, alpha subunit, isoform 1 [Mus musculus]    | 1624.8953 | 73.39  | 0.336694083 |
| 12331398 | TGASFQQAQEFSQIGFSSR            |               | secretory carrier membrane protein 2 [Mus musculus]                                                 | 2205.0266 | 39.56  | 1.355840161 |
| 31560790 | TGDAISMSEVAQTLTQDVR            |               | 1-acylglycerol-3-phosphate O-acyltransferase 1 [Mus musculus]                                       | 2234.1284 | 28.23  | 0.499742993 |
| 28077103 | TGDLGDINAEQLPGR                |               | phospholipase A2, activating protein [Mus musculus]                                                 | 1555.7694 | 38.69  | 0           |
| 58037267 | TGEAIVDAALSALR                 |               | protein disulfide isomerase-associated 6 [Mus musculus]                                             | 1386.7612 | 105.65 | 0.835308833 |
| 6755004  | TGGLEIDSDFGGFR                 |               | programmed cell death 8 [Mus musculus]                                                              | 1470.6863 | 87.24  | 0.346160284 |
| 64427157 | TGGMAGGPPDALQTDGLR             |               | PREDICTED: synaptopodin 2 [Mus musculus]                                                            | 1673.7806 | 24.12  | 0           |
| 42415475 | TGPAATLSLSDTAAAESLVDSSEVTGIFFK |               | prolyl 4-hydroxylase, beta polypeptide [Mus musculus]                                               | 2985.5022 | 128.84 | 0.325343412 |
| 6681095  | TGQAAGFSYTDANK                 |               | cytochrome c, somatic [Mus musculus]                                                                | 1430.652  | 84.2   | 0.315970764 |
| 31981273 | TGQEIPVNLN                     |               | CNDP dipeptidase 2 (metallopeptidase M20 family) [Mus musculus]                                     | 1126.6241 | 61.33  | 1.44417284  |
| 34996495 | TGQEVVFAEPDNK                  |               | ribophorin II [Mus musculus]                                                                        | 1532.7555 | 64.68  | 0           |
| 6680748  | TGTAEMSSILEER                  |               | ATP synthase, H+ transporting, mitochondrial F1 complex, alpha subunit, isoform 1 [Mus musculus]    | 1423.673  | 69.43  | 0.476705021 |
| 6806903  | TGTLTTNQMSVCR                  |               | ATPase, Ca++ transporting, cardiac muscle, slow twitch 2 [Mus musculus]                             | 1411.6685 | 37.08  | 1.006896401 |
| 31542159 | TGTLTTNQMSVCR                  |               | ATPase, Ca++ transporting, ubiquitous [Mus musculus]                                                | 1411.6685 | 37.08  | 1.006896401 |
| 51767879 | TGVAPIIDVVR                    |               | PREDICTED: similar to ribosomal protein L27A [Mus musculus]                                         | 1139.6781 | 62.84  | 0.379127639 |
| 31560517 | TGVAPIIDVVR                    |               | ribosomal protein L27a [Mus musculus]                                                               | 1139.6781 | 62.84  | 0.379127639 |
| 63746482 | TGVAVNKPAEFTVDAK               |               | PREDICTED: filamin, alpha [Mus musculus]                                                            | 1646.8739 | 62.87  | 0           |
| 7305295  | TGVLAHLEEER                    |               | myosin, heavy polypeptide 11, smooth muscle [Mus musculus]                                          | 1253.6534 | 47.84  | 0           |
| 6754576  | TGVPSQTPNPIYANQR               |               | lymphocyte antigen 64 [Mus musculus]                                                                | 1629.8011 | 43.85  | 0.362426071 |
| 33859724 | TGYTLDVTTGQR                   |               | heterogeneous nuclear ribonucleoprotein R [Mus musculus]                                            | 1311.6588 | 69.74  | 0.474100598 |
| 13242328 | TGYTLDVTTGQR                   |               | NS1-associated protein 1 [Mus musculus]                                                             | 1311.6588 | 69.74  | 0.474100598 |
| 29293809 | TIAIIAEGIPREALTR               |               | ATP citrate lyase [Mus musculus]                                                                    | 1567.9125 | 76.66  | 0.331821612 |
| 31980648 | TIAMDGTEGLVR                   |               | ATP synthase, H+ transporting mitochondrial F1 complex, beta subunit [Mus musculus]                 | 1262.6421 | 84.83  | 0           |
| 6754976  | TIAQDYGVLK                     |               | peroxiredoxin 1 [Mus musculus]                                                                      | 1107.5985 | 53.85  | 0.577243176 |
| 33859811 | TIEYLEEVAVNFAK                 |               | hydroxyacyl-Coenzyme A dehydrogenase/3-ketoacyl-Coenzyme A thiolase/enoyl-Coenzyme A hydratase (tri | 1625.8329 | 62.83  | 0.89087703  |
| 6754854  | TIFWTDSQLDR                    |               | nidogen 1 [Mus musculus]                                                                            | 1381.6639 | 30.96  | 0           |
| 34740335 | TIGGGDDSFNTFFSETGAGK           |               | tubulin, alpha 2 [Mus musculus]                                                                     | 2007.9021 | 69.06  | 0.316651826 |
| 6678469  | TIGGGDDSFNTFFSETGAGK           |               | tubulin, alpha 6 [Mus musculus]                                                                     | 2007.9021 | 69.06  | 0.316651826 |
| 6678467  | TIGGGDDSFNTFFSETGAGK           |               | tubulin, alpha 4 [Mus musculus]                                                                     | 2010.8928 | 53.01  | 0.524387767 |
| 31981909 | TIGVSNFNPLQIER                 |               | aldo-keto reductase family 1, member B3 (aldose reductase) [Mus musculus]                           | 1587.8464 | 40.81  | 0.394575053 |

|          |                           |                                                                                                      |           |       |             |
|----------|---------------------------|------------------------------------------------------------------------------------------------------|-----------|-------|-------------|
| 6754816  | TIISYIDEQFER              | septin 2 [Mus musculus]                                                                              | 1513.7556 | 67.81 | 0.294709184 |
| 31543605 | TILPAAQDYYR               | riboporphin I [Mus musculus]                                                                         | 1480.7822 | 49.65 | 0           |
| 14149647 | TILSNQVDIPENVEITLK        | ribosomal protein L9 [Mus musculus]                                                                  | 2127.1582 | 65.51 | 0.604901069 |
| 11230802 | TINEVENQILTR              | actinin alpha 4 [Mus musculus]                                                                       | 1429.7673 | 70.96 | 0.30465498  |
| 33468903 | TIPAWATLSASQLAR           | heterochromatin protein 1, binding protein 3 [Mus musculus]                                          | 1585.8699 | 28.7  | 1.127892831 |
| 33667082 | TIPGTALVEMGDEYAVER        | heterogeneous nuclear ribonucleoprotein L-like [Mus musculus]                                        | 1950.9542 | 45.41 | 0           |
| 11230802 | TIPWLEDR                  | actinin alpha 4 [Mus musculus]                                                                       | 1029.5378 | 34.71 | 0.337515177 |
| 59709449 | TIPWLENR                  | actinin alpha 2 [Mus musculus]                                                                       | 1028.5552 | 28.77 | 0.132955876 |
| 6678469  | TIQFVDWCPTGFK             | tubulin, alpha 6 [Mus musculus]                                                                      | 1541.7457 | 58.59 | 0.464347386 |
| 6753072  | TISFIPDGDFFELMSYR         | adaptor protein complex AP-1, mu 2 subunit [Mus musculus]                                            | 1987.9612 | 33.54 | 0.919501408 |
| 9845265  | TITLEVEPSDTIENVK          | ubiquitin A-52 residue ribosomal protein fusion product 1 [Mus musculus]                             | 1787.9265 | 89.79 | 0.409676428 |
| 6755809  | TLAESALQLLYTAK            | talin 1 [Mus musculus]                                                                               | 1521.8496 | 68.6  | 0.29749901  |
| 6680067  | TLASLSPETSLFIASK          | glucose phosphate isomerase 1 [Mus musculus]                                                         | 1777.9937 | 65.64 | 0           |
| 6753190  | TLATSLYNLLAR              | galactosidase, beta 1 [Mus musculus]                                                                 | 1335.7704 | 25.13 | 0.193917253 |
| 21314832 | TLDGGLNVIQLETAVGAIAIK     | UDP-glucose pyrophosphorylase 2 [Mus musculus]                                                       | 1983.0974 | 40.1  | 0.655729693 |
| 31981828 | TLDLPIYVTR                | coatomer protein complex subunit alpha [Mus musculus]                                                | 1190.6775 | 50.23 | 0.304738102 |
| 30911099 | TLEAVQDILLEQGR            | fatty acid synthase [Mus musculus]                                                                   | 1471.7728 | 61.32 | 0           |
| 50355692 | TLEGELHDLR                | lamin A isoform A [Mus musculus]                                                                     | 1182.6102 | 31.56 | 1.913977568 |
| 63641940 | TLELQGLINDLQR             | PREDICTED: desmoplakin [Mus musculus]                                                                | 1512.8407 | 47.73 | 1.027849089 |
| 22129770 | TLEQQENFEELVAR            | ankyrin 3, epithelial isoform b [Mus musculus]                                                       | 1592.7548 | 50.82 | 0.339271169 |
| 22779912 | TLESVDPLGGLNTDILTAR       | dynamitin 1-like [Mus musculus]                                                                      | 2211.2246 | 25.31 | 0.312693987 |
| 27754067 | TLEVEIEPQVR               | DnaJ (Hsp40) homolog, subfamily B, member 11 [Mus musculus]                                          | 1241.6671 | 34.6  | 0           |
| 30520375 | TLFQIQAER                 | UDP-N-acetylglucosamine pyrophosphorylase 1 homolog [Mus musculus]                                   | 1105.5973 | 26.77 | 6.431210376 |
| 8392847  | TLFSNIVLSGGSTLFK          | ARP1 actin-related protein 1 homolog A [Mus musculus]                                                | 1683.9315 | 68.09 | 0           |
| 22122615 | TLFSNIVLSGGSTLFK          | ARP1 actin-related protein 1 homolog B [Mus musculus]                                                | 1683.9315 | 68.09 | 0           |
| 30725863 | TLHVVEVVPSEIPFGLGR        | glycyl-tRNA synthetase [Mus musculus]                                                                | 2165.1592 | 22.93 | 0.486851732 |
| 21389320 | TLLELPELPR                | leucine-rich PPR motif-containing protein [Mus musculus]                                             | 1196.7305 | 31.07 | 0.368898751 |
| 33563236 | TLLGDVPPVADPTVPNVTVTR     | Rho, GDP dissociation inhibitor (GDI) beta [Mus musculus]                                            | 2163.2031 | 55.68 | 2.177407404 |
| 7305295  | TLLQQLQAETELYAESEEMR      | myosin, heavy polypeptide 11, smooth muscle [Mus musculus]                                           | 2511.1882 | 38.6  | 0.088591423 |
| 37202121 | TLLTGLLDLQAQYQFISR        | 4-aminobutyrate aminotransferase [Mus musculus]                                                      | 2177.198  | 32    | 0.239610039 |
| 31981679 | TLNDELEIEGEMK             | heat shock protein 1 (chaperonin) [Mus musculus]                                                     | 1504.7555 | 40.4  | 0.522739143 |
| 54607098 | TLNEADCATVPPAIR           | succinate dehydrogenase Fp subunit [Mus musculus]                                                    | 1570.7902 | 73.22 | 0.511487072 |
| 31981657 | TLNFKNEEGDAEAMVDNWRPAQPLK | carbonic anhydrase 2 [Mus musculus]                                                                  | 2874.3276 | 71.5  | 0.190232039 |
| 31981657 | TLNFKNEEGDAEAMVDNWRPAQPLK | carbonic anhydrase 2 [Mus musculus]                                                                  | 2890.3401 | 54.9  | 0.943914489 |
| 31541791 | TLPELYELVNR               | fucosidase, alpha-L-2, plasma [Mus musculus]                                                         | 1346.7333 | 23.11 | 0.384367447 |
| 6754480  | TLQGLEIELQSQLSMK          | keratin 13 [Mus musculus]                                                                            | 1817.9668 | 37.45 | 3.71303892  |
| 6680602  | TLQGLEIELQSQLSMK          | keratin complex 1, acidic, gene 15 [Mus musculus]                                                    | 1817.9668 | 37.45 | 3.71303892  |
| 6680606  | TLQGLEIELQSQLSMK          | keratin complex 1, acidic, gene 19 [Mus musculus]                                                    | 1817.9668 | 37.45 | 3.71303892  |
| 6016411  | TLQGLEIELQSQLSMK          | Keratin, type I cytoskeletal 13 (Cytokeratin 13) (K13) (CK 13)                                       | 1817.9668 | 37.45 | 3.71303892  |
| 417200   | TLQGLEIELQSQLSMK          | Keratin, type I cytoskeletal 19 (Cytokeratin 19) (K19) (CK 19)                                       | 1817.9668 | 37.45 | 3.71303892  |
| 15426055 | TLQLALDLVSSR              | coatomer protein complex, subunit beta 1 [Mus musculus]                                              | 1315.7653 | 30    | 0           |
| 6755376  | TLTAVHDAILEDLVFPSEIVGK    | ribosomal protein S7 [Mus musculus]                                                                  | 2367.2537 | 26.74 | 1.588007855 |
| 6678726  | TLTGTAALTVQSQEENLR        | leukotriene A4 hydrolase [Mus musculus]                                                              | 1932.0051 | 65.54 | 0.37852453  |
| 6754254  | TLTIVDTGIGMTK             | heat shock protein 1, alpha [Mus musculus]                                                           | 1349.7233 | 68.28 | 0           |
| 46195798 | TLVLLDNLNVR               | dolichyl-di-phosphooligosaccharide-protein glycotransferase [Mus musculus]                           | 1269.7554 | 52.65 | 1.079192166 |
| 31543315 | TLVLSNLSYSATK             | nucleolin [Mus musculus]                                                                             | 1396.7727 | 22.97 | 0           |
| 22122535 | TMADSSYNLEVNQILSLFK       | pleckstrin homology domain containing, family C (with FERM domain) member 1 [Mus musculus]           | 2173.0769 | 48.01 | 0           |
| 7110703  | TMLELLNQLDGFQATK          | protease (prosome, macropain) 26S subunit, ATPase 5 [Mus musculus]                                   | 1822.9205 | 45.59 | 0.782736588 |
| 6679503  | TMLELLNQLDGFQPNQVQK       | proteasome (prosome, macropain) 26S subunit, ATPase 3 [Mus musculus]                                 | 2189.1216 | 33.51 | 0           |
| 6755809  | TMLESAGGLIQTAR            | talin 1 [Mus musculus]                                                                               | 1447.7579 | 38.41 | 0           |
| 33563250 | TNEKVELQELNDR             | desmin [Mus musculus]                                                                                | 1587.7975 | 42.87 | 0           |
| 31982755 | TNEKVELQELNDR             | vimentin [Mus musculus]                                                                              | 1587.7975 | 42.87 | 0           |
| 63589808 | TNYNDRYDEIR               | PREDICTED: similar to 60S ribosomal protein L7a (Surfeit locus protein 3) [Mus musculus]             | 1458.6682 | 27.77 | 0.362698392 |
| 7305443  | TNYNDRYDEIR               | ribosomal protein L7a [Mus musculus]                                                                 | 1458.6682 | 27.77 | 0.362698392 |
| 22094123 | TPAQSGAWDPNPNTPSR         | suppressor of Ty 5 homolog [Mus musculus]                                                            | 1909.8748 | 34.48 | 0.676852048 |
| 6996913  | TPAQYDASELK               | annexin A2 [Mus musculus]                                                                            | 1222.5885 | 74.39 | 0           |
| 51592084 | TPELTWER                  | hypothetical protein LOC74340 [Mus musculus]                                                         | 1031.5148 | 40.56 | 0.359207449 |
| 8394269  | TPETVFIWFGPPNK            | ST6 (alpha-N-acetyl-neuraminyl-2,3-beta-galactosyl-1,3)-N-acetyl-galactosaminide alpha-2,6-sialyltra | 1632.8468 | 33.69 | 1.456911198 |
| 6753364  | TPFLLVGTQIDLRL            | cell division cycle 42 homolog [Mus musculus]                                                        | 1472.8455 | 71.11 | 0.420671326 |
| 9790061  | TPLFDQIIDMLR              | pyroline-5-carboxylate synthetase [Mus musculus]                                                     | 1461.7803 | 22.66 | 0.968643471 |

Oxidation (M)

|          |                                |                                                                                                  |           |        |             |
|----------|--------------------------------|--------------------------------------------------------------------------------------------------|-----------|--------|-------------|
| 63607160 | TPLSEAEFEEIMNR                 | PREDICTED: cleavage and polyadenylation specific factor 6 [Mus musculus]                         | 1665.7853 | 44.47  | 0.956567737 |
| 29336026 | TPNVGGPGGQVVEWTAR              | nonmuscle myosin heavy chain [Mus musculus]                                                      | 1722.8617 | 63.28  | 0.357232837 |
| 6677935  | TPVDYIDLPHYSSSPSR              | sorbin and SH3 domain containing 1 [Mus musculus]                                                | 1796.8687 | 74.34  | 0           |
| 19527174 | TPVEEVPAAAIAPFQGR              | splicing factor 3b, subunit 3 [Mus musculus]                                                     | 1681.8899 | 61.4   | 0.45010778  |
| 13385652 | TPVEPEVAIHR                    | ribosomal protein S20 [Mus musculus]                                                             | 1247.6748 | 64.74  | 0.830224614 |
| 7304885  | TPVLFVVEIK                     | annexin A11 [Mus musculus]                                                                       | 1323.7102 | 61.82  | 0           |
| 19882201 | TPVQSQQPSATTPSGADEK            | proteasome 26S non-ATPase subunit 2 [Mus musculus]                                               | 1928.9176 | 71.17  | 0.74874817  |
| 18250284 | TPYTDVNIIVTIR                  | isocitrate dehydrogenase 3 (NAD+) alpha [Mus musculus]                                           | 1391.7501 | 68.11  | 0.313226305 |
| 31980726 | TQAYPDQKPGTSGLR                | phosphoglucomutase 2 [Mus musculus]                                                              | 1618.8202 | 24.41  | 0.268602712 |
| 31981824 | TQDDIETLQLFR                   | ankyrin repeat domain 25 [Mus musculus]                                                          | 1591.8271 | 57.53  | 0.502659545 |
| 6678752  | TQDDVDIADVAYYFEK               | lymphocyte antigen 74 [Mus musculus]                                                             | 1891.8701 | 102    | 0.246882151 |
| 6754750  | TQEQLASEMAELTAR                | moesin [Mus musculus]                                                                            | 1677.8113 | 59.76  | 0           |
| 33598964 | TQLEELEDELQATEDAK              | myosin heavy chain 10, non-muscle [Mus musculus]                                                 | 1961.9242 | 121.86 | 0.112207593 |
| 20137006 | TQLEELEDELQATEDAK              | myosin, heavy polypeptide 9, non-muscle [Mus musculus]                                           | 1961.9242 | 121.86 | 0.112207593 |
| 9256555  | TQLYEYLNQR                     | nucleolar protein 5 [Mus musculus]                                                               | 1327.6649 | 47.47  | 0.685734863 |
| 6680572  | TQMLDQEELLASTR                 | kinesin family member 5B [Mus musculus]                                                          | 1634.8157 | 35.54  | 0           |
| 31980636 | TQQTNDIELQQEQR                 | mannosidase, beta A, lysosomal [Mus musculus]                                                    | 1730.8342 | 69.41  | 0.220436202 |
| 56090231 | TQSDDSEER                      | WD repeat domain 22 [Mus musculus]                                                               | 1066.4479 | 22.83  | 0.350356597 |
| 29336026 | TQVTELEDELTAEDAK               | nonmuscle myosin heavy chain [Mus musculus]                                                      | 1862.8879 | 41.6   | 0           |
| 21704144 | TQVTVQYMQDR                    | methionine adenosyltransferase II, alpha [Mus musculus]                                          | 1368.6586 | 31.76  | 1.334887868 |
| 22267442 | TSAAPGGVPLQPQDLFTK             | ubiquinol cytochrome c reductase core protein 2 [Mus musculus]                                   | 1955.9996 | 36.72  | 0           |
| 21450277 | TSATWFALSR                     | Na+/K+ -ATPase alpha 1 subunit [Mus musculus]                                                    | 1139.5784 | 48.52  | 0.262384885 |
| 21704096 | TSDLIVLGLPWK                   | TAR DNA binding protein isoform 1 [Mus musculus]                                                 | 1341.7791 | 60.34  | 0.377573141 |
| 55742711 | TSFIQYLLGEQVPGSR               | EH-domain containing 2 [Mus musculus]                                                            | 1866.9583 | 57.97  | 0.14317476  |
| 13384736 | TSFLDDAFR                      | dynein, cytoplasmic, heavy chain 1 [Mus musculus]                                                | 1071.5203 | 26.12  | 0           |
| 26986539 | TSFSQEQSCDSAGEGSEER            | Rho GTPase activating protein 12 [Mus musculus]                                                  | 1904.7689 | 39.53  | 0           |
| 13430890 | TSGPPVSELITK                   | histone 1, H1e [Mus musculus]                                                                    | 1228.6716 | 57.94  | 0.132367854 |
| 6680748  | TSIAIDIINQK                    | ATP synthase, H+ transporting, mitochondrial F1 complex, alpha subunit, isoform 1 [Mus musculus] | 1316.7314 | 56.38  | 0           |
| 51491845 | TSIDAYDNFQNSLAQR               | clathrin, heavy polypeptide (Hc) [Mus musculus]                                                  | 1942.9154 | 65.83  | 0.351499523 |
| 27501448 | TSIEDQDELSLLQVPLVAGTVNR        | integrin beta 4 binding protein [Mus musculus]                                                   | 2584.3503 | 84.18  | 0.400019298 |
| 9506945  | TSLLALDESLFR                   | poly(A) binding protein, nuclear 1 [Mus musculus]                                                | 1251.6606 | 34.14  | 0           |
| 6671684  | TSMGGTQQQFVEGVR                | catenin beta 1 [Mus musculus]                                                                    | 1624.7783 | 43.44  | 0           |
| 51765817 | TSPNEGLSGNPADLER               | PREDICTED: plasma membrane calcium ATPase 1 [Mus musculus]                                       | 1656.7875 | 22.36  | 0           |
| 6678359  | TSRPEIAIYSNNEDFQVQAK           | transketolase [Mus musculus]                                                                     | 2481.2031 | 53.52  | 0.302636081 |
| 21313262 | TSSAEMPTIPLGSVAEAIR            | inner membrane protein, mitochondrial [Mus musculus]                                             | 1929.9966 | 84.04  | 0           |
| 31982275 | TSTVDLPIESQLLWQLDR             | heat shock protein 4 [Mus musculus]                                                              | 2114.1133 | 66.63  | 0.408906351 |
| 6753294  | TSVQTEDDQLIAGQSAR              | catenin alpha 1 [Mus musculus]                                                                   | 1818.8843 | 73.3   | 0.710837781 |
| 31980953 | TSWDFIEGEADDGITYNNDLAAFR       | hydroxyacid oxidase (glycolate oxidase) 3 [Mus musculus]                                         | 2720.2192 | 90.24  | 0.132813207 |
| 29293809 | TTDGVYEGVAIGGDR                | ATP citrate lyase [Mus musculus]                                                                 | 1509.7218 | 69.42  | 0.209495325 |
| 6679761  | TTEDEPSEKDALQPGR               | fructose bisphosphatase 2 [Mus musculus]                                                         | 1772.8348 | 44.56  | 0           |
| 63530525 | TFEDLIQR                       | PREDICTED: SEC31-like 1 [Mus musculus]                                                           | 1122.5812 | 32.49  | 0.531423529 |
| 6679791  | TFLEAWEGMEELVDQGLVK            | aldo-keto reductase family 1, member B8 [Mus musculus]                                           | 2295.1128 | 71.95  | 0.733844863 |
| 46519156 | TTGFGMIYDSLIDYAK               | ribosomal protein S24 isoform 1 [Mus musculus]                                                   | 1681.7916 | 54.15  | 0.872844528 |
| 6671507  | TTGIVLDSGDGVTNHVPIYEGYALPHAIMR | actin, alpha 2, smooth muscle, aorta [Mus musculus]                                              | 3196.6025 | 62.57  | 0           |
| 6671509  | TTGIVMDSGDGVTHTVPIYEGYALPHAILR | actin, beta, cytoplasmic [Mus musculus]                                                          | 3183.624  | 57.93  | 0.285357373 |
| 30425250 | TTGIVMDSGDGVTHTVPIYEGYALPHAILR | hypothetical protein LOC238880 [Mus musculus]                                                    | 3183.624  | 57.93  | 0.285357373 |
| 6754556  | TTIPEEEEEEEPIGVAVEEER          | lamin B1 [Mus musculus]                                                                          | 2672.1917 | 124.94 | 0.28486302  |
| 8393800  | TTTTTTTTSSSTTVGSAR             | myeloid-associated differentiation marker [Mus musculus]                                         | 1671.8419 | 27.87  | 0.211198811 |
| 18034769 | TLSTFQSPFSVTR                  | sorting nexin 5 [Mus musculus]                                                                   | 1700.8508 | 23.41  | 0.713601352 |
| 46519156 | TPDVIFVFGFR                    | ribosomal protein S24 isoform 1 [Mus musculus]                                                   | 1398.7451 | 67.74  | 0.55307112  |
| 6754256  | TTPSVVAFADGER                  | heat shock protein 9A [Mus musculus]                                                             | 1450.7212 | 51.25  | 0           |
| 50080209 | TTPSYVAFDTTER                  | heat shock protein 1A [Mus musculus]                                                             | 1487.7096 | 94.63  | 0.499461123 |
| 7305163  | TTPSYVAFDTTER                  | heat shock protein 1-like [Mus musculus]                                                         | 1487.7096 | 94.63  | 0.499461123 |
| 31981690 | TTPSYVAFDTTER                  | heat shock protein 8 [Mus musculus]                                                              | 1487.7096 | 94.63  | 0.499461123 |
| 6753428  | TTPTGWTLDQCQTGVDPNGHPHFIK      | creatine kinase, mitochondrial 1, ubiquitous [Mus musculus]                                      | 2726.3181 | 66.82  | 0.220918939 |
| 24429590 | TTQVPQYILDDFIQNDR              | DEAH (Asp-Glu-Ala-His) box polypeptide 9 [Mus musculus]                                          | 2066.0212 | 83.84  | 0.376498836 |
| 6681157  | TTYLVLDEADR                    | DEAD (Asp-Glu-Ala-Asp) box polypeptide 5 [Mus musculus]                                          | 1295.6493 | 24.43  | 4.60343951  |
| 63621901 | TTYLVLDEADR                    | PREDICTED: similar to ddx5 [Mus musculus]                                                        | 1295.6493 | 24.43  | 4.60343951  |
| 6679237  | TVAVYSEQDTGQMHR                | pyruvate carboxylase [Mus musculus]                                                              | 1721.7998 | 30.98  | 0           |
| 6755142  | TVDNFVALATGEK                  | peptidylprolyl isomerase B [Mus musculus]                                                        | 1364.6993 | 83.68  | 0.919614403 |

|          |                           |               |                                                                                                      |           |        |             |
|----------|---------------------------|---------------|------------------------------------------------------------------------------------------------------|-----------|--------|-------------|
| 31982233 | TVEVPEDEVVR               |               | LYRIC [Mus musculus]                                                                                 | 1271.6462 | 29.34  | 0           |
| 18875380 | TVFDEAIR                  |               | RAS-related C3 botulinum substrate 3 [Mus musculus]                                                  | 950.4941  | 34.31  | 0.426449638 |
| 31981273 | TVFGVEPDLTR               |               | CNDP dipeptidase 2 (metallopeptidase M20 family) [Mus musculus]                                      | 1233.644  | 33.55  | 0           |
| 23956104 | TVGIDDLTGEPLIQR           |               | adenylate kinase 3 [Mus musculus]                                                                    | 1626.8604 | 35.33  | 0.6243784   |
| 6753428  | TVGMVAGDEETYEVAELFDPVIQER |               | creatine kinase, mitochondrial 1, ubiquitous [Mus musculus]                                          | 2944.394  | 90.2   | 0.234201448 |
| 6753428  | TVGMVAGDEETYEVAELFDPVIQER | Oxidation (M) | creatine kinase, mitochondrial 1, ubiquitous [Mus musculus]                                          | 2960.3918 | 69.9   | 0           |
| 8393988  | TVGYTVTAPEDTR             |               | phosphomannomutase 2 [Mus musculus]                                                                  | 1409.6947 | 26.85  | 0.345370456 |
| 31981679 | TVIIQSWGSPK               |               | heat shock protein 1 (chaperonin) [Mus musculus]                                                     | 1344.7076 | 75.6   | 0.348036871 |
| 33859811 | TVLGVPEVLLGILPGAGGTQR     |               | hydroxyacyl-Coenzyme A dehydrogenase/3-ketoacyl-Coenzyme A thiolase/enoyl-Coenzyme A hydratase (tri  | 2047.1946 | 85.03  | 0.317244291 |
| 31980648 | TVLIMELINNAK              |               | ATP synthase, H+ transporting mitochondrial F1 complex, beta subunit [Mus musculus]                  | 1457.8507 | 71.09  | 0.349826797 |
| 31980648 | TVLIMELINNAK              | Oxidation (M) | ATP synthase, H+ transporting mitochondrial F1 complex, beta subunit [Mus musculus]                  | 1473.8207 | 39.1   | 0.124359355 |
| 33859506 | TMDDFAQFLDTCCK            |               | albumin 1 [Mus musculus]                                                                             | 1736.7303 | 90.55  | 0.314438219 |
| 33859506 | TMDDFAQFLDTCCK            | Oxidation (M) | albumin 1 [Mus musculus]                                                                             | 1752.7194 | 89.69  | 0           |
| 63479927 | TVNQQSVAAPTvk             |               | PREDICTED: BAT2 domain containing 1 [Mus musculus]                                                   | 1342.7344 | 23.25  | 0           |
| 7657011  | TVPLYESPR                 |               | damage specific DNA binding protein 1 [Mus musculus]                                                 | 1061.5608 | 27     | 0.196674674 |
| 6678449  | TVSVLNGGFR                |               | thiosulfate sulfurtransferase, mitochondrial [Mus musculus]                                          | 1049.5693 | 28.07  | 0.143345664 |
| 21361209 | TVTAMDVVYALK              |               | germinal histone H4 [Mus musculus]                                                                   | 1310.7178 | 58.02  | 0           |
| 21361209 | TVTAMDVVYALK              | Oxidation (M) | germinal histone H4 [Mus musculus]                                                                   | 1326.709  | 54.67  | 0           |
| 8567336  | TVTLELLDNGAGADATK         |               | chloride channel calcium activated 3 [Mus musculus]                                                  | 1688.8685 | 116.7  | 0           |
| 31981690 | TVTNAVTVPAYFNDSQR         |               | heat shock protein 8 [Mus musculus]                                                                  | 1982.0048 | 96.91  | 0.509518889 |
| 12963563 | TVTQVVAEAGQENGQR          |               | apoptotic chromatin condensation inducer 1 [Mus musculus]                                            | 1712.8577 | 22.78  | 0.388710202 |
| 46909602 | TWEPEDVCSFLENR            |               | SAM domain- and HD domain-containing protein 1 [Mus musculus]                                        | 1724.7744 | 29.57  | 1.589473484 |
| 31981722 | TWNDPSVQQDIK              |               | heat shock 70kD protein 5 (glucose-regulated protein) [Mus musculus]                                 | 1430.692  | 89.15  | 1.005330614 |
| 6755578  | TYAFSENPLPTVEIAIR         |               | SWI/SNF related, matrix associated, actin dependent regulator of chromatin, subfamily b, member 1 [  | 1920.9998 | 24.8   | 0.529003323 |
| 47059123 | TYAVSHTQEDLNR             |               | UDP glucuronosyltransferase 1 family, polypeptide A10 [Mus musculus]                                 | 1533.7111 | 38.85  | 0           |
| 63589703 | TYGVSFFLVK                |               | PREDICTED: talin 2 [Mus musculus]                                                                    | 1160.6235 | 28.19  | 0.902795849 |
| 6755809  | TYGVSFFLVK                |               | talin 1 [Mus musculus]                                                                               | 1160.6235 | 28.19  | 0.902795849 |
| 29789080 | TYLPSQVSR                 |               | coatamer protein complex, subunit beta 2 (beta prime) [Mus musculus]                                 | 1050.5604 | 34.34  | 0.385309231 |
| 23346461 | TYLQALPYFDR               |               | NADH dehydrogenase (ubiquinone) Fe-S protein 2 [Mus musculus]                                        | 1386.7047 | 38.96  | 0.287441341 |
| 13384828 | TYNFLPEYLASTQK            |               | serine (or cysteine) proteinase inhibitor, clade B, member 1a [Mus musculus]                         | 1674.8337 | 46.77  | 0.532889933 |
| 30409988 | TYNLGTGTGYSVLQMVQAMEK     |               | galactose-4-epimerase, UDP [Mus musculus]                                                            | 2291.1104 | 44.37  | 0           |
| 18152793 | TYMSAGLQPVPIVFR           |               | pyruvate dehydrogenase (lipoamide) beta [Mus musculus]                                               | 1841.9673 | 53.87  | 0           |
| 13384736 | VAAPDVVVTLDLTVR           |               | dynein, cytoplasmic, heavy chain 1 [Mus musculus]                                                    | 1551.8744 | 73.34  | 0.317198403 |
| 21704128 | VAAVQPPPEEGPSR            |               | eukaryotic translation initiation factor 4B [Mus musculus]                                           | 1336.6909 | 37.56  | 0.479635799 |
| 7709980  | VADIGLAAWGR               |               | S-adenosylhomocysteine hydrolase [Mus musculus]                                                      | 1128.6163 | 62.65  | 0.385928391 |
| 37059806 | VADPSYLPTQQDVLK           |               | guanine nucleotide binding protein, alpha q polypeptide [Mus musculus]                               | 1701.8802 | 23.89  | 0.501695643 |
| 6755594  | VADPVVTCETVVETSSLK        |               | U5 small nuclear ribonucleoprotein [Mus musculus]                                                    | 2024.0044 | 35.54  | 1.464010565 |
| 20137006 | VAEFTTNLMEEEEK            |               | myosin, heavy polypeptide 9, non-muscle [Mus musculus]                                               | 1669.7595 | 45.5   | 1.391905973 |
| 21313080 | VAEGIFETEAPGGYK           |               | hypothetical protein LOC67201 [Mus musculus]                                                         | 1567.7534 | 33.53  | 0           |
| 31981549 | VAELNPDENICR              |               | sulfide quinone reductase-like [Mus musculus]                                                        | 1372.6548 | 56.66  | 0.732017166 |
| 33563250 | VAELYEEEMR                |               | desmin [Mus musculus]                                                                                | 1268.5874 | 52.52  | 0           |
| 33563250 | VAELYEEEMR                | Oxidation (M) | desmin [Mus musculus]                                                                                | 1284.5715 | 23.82  | 0.087747057 |
| 21312260 | VAEQTPLSALYASLIK          |               | aldehyde dehydrogenase 1 family, member B1 [Mus musculus]                                            | 1817.0403 | 91.24  | 0.194549283 |
| 6753036  | VAEQTPLTALYVANLIK         |               | aldehyde dehydrogenase 2, mitochondrial [Mus musculus]                                               | 1844.0513 | 51.36  | 0.231042228 |
| 6753914  | VAGPQPAQTGAPQGSGLGEYLFER  |               | ferritin light chain 1 [Mus musculus]                                                                | 2373.1685 | 69.43  | 0.082199723 |
| 9910556  | VAGQDGSVVQFK              |               | SMT3 (suppressor of mif two, 3) homolog 1 [Mus musculus]                                             | 1234.632  | 54.55  | 1.343042806 |
| 63476037 | VAIAQFSDDVFR              |               | PREDICTED: procollagen, type VI, alpha 3 [Mus musculus]                                              | 1220.6268 | 64.57  | 0           |
| 22128627 | VAIEPGVPR                 |               | sorbitol dehydrogenase 1 [Mus musculus]                                                              | 937.5453  | 22.43  | 0           |
| 13937395 | VALSEPPQPER               |               | arsenate resistance protein 2 [Mus musculus]                                                         | 1125.5906 | 25.51  | 0.436242103 |
| 31980648 | VALTGLTVAEYFR             |               | ATP synthase, H+ transporting mitochondrial F1 complex, beta subunit [Mus musculus]                  | 1439.7948 | 106.05 | 0.345180142 |
| 63476037 | VALVQYSR                  |               | PREDICTED: procollagen, type VI, alpha 3 [Mus musculus]                                              | 1050.5577 | 41.23  | 0.604457416 |
| 18079339 | VAMSHFEPSEYIR             |               | aconitase 2, mitochondrial [Mus musculus]                                                            | 1565.7427 | 38.11  | 0           |
| 63746482 | VANPSGNLTDYVQDCGDGTYK     |               | PREDICTED: filamin, alpha [Mus musculus]                                                             | 2318.0276 | 129.45 | 0.546806661 |
| 31542559 | VAPAPAGVFTDIPISNR         |               | dihydrolipoamide S-acetyltransferase (E2 component of pyruvate dehydrogenase complex) [Mus musculus] | 1838.017  | 79.43  | 0.344354908 |
| 6671507  | VAPEEHPTLLTEAPLNPK        |               | actin, alpha 2, smooth muscle, aorta [Mus musculus]                                                  | 1956.0472 | 100.43 | 0.091509051 |
| 6671509  | VAPEEHPVLLTEAPLNPK        |               | actin, beta, cytoplasmic [Mus musculus]                                                              | 1954.0635 | 101.43 | 0.238791303 |
| 54607037 | VAPGYTVTAEQDAR            |               | integrin beta 4 isoform 2 [Mus musculus]                                                             | 1640.7904 | 59.85  | 0.482301978 |
| 6753138  | VAPPGLTQIQIQK             |               | Na+/K+ -ATPase beta 1 subunit [Mus musculus]                                                         | 1489.8727 | 27.16  | 0.522569579 |
| 13385598 | VAQLEQVYIR                |               | small nuclear ribonucleoprotein D3 [Mus musculus]                                                    | 1218.6826 | 24.34  | 0.515661162 |
| 63746482 | VAQPSITDNKDGTVTVR         |               | PREDICTED: filamin, alpha [Mus musculus]                                                             | 1800.9465 | 71.24  | 0.176395412 |

|          |                            |                    |                                                                                                 |           |        |             |
|----------|----------------------------|--------------------|-------------------------------------------------------------------------------------------------|-----------|--------|-------------|
| 27545181 | VAQPTAEQAQAFK              |                    | v-raf murine sarcoma 3611 viral oncogene homolog [Mus musculus]                                 | 1388.7025 | 45.32  | 0           |
| 33563270 | VASSVPVENFTIHGGLSR         |                    | oxoglutarate dehydrogenase (lipoamide) [Mus musculus]                                           | 1869.9803 | 46.17  | 0.790197894 |
| 15426055 | VASTENGIIIFGNIVYDVSGAASDR  |                    | coatamer protein complex, subunit beta 1 [Mus musculus]                                         | 2455.2102 | 61.6   | 0           |
| 6753324  | VATAQDDITGDGTTSNVLIIGELLLK |                    | chaperonin subunit 6a (zeta) [Mus musculus]                                                     | 2544.3374 | 89.53  | 0.65160744  |
| 63746482 | VATVPQHATSGPGPADVSK        |                    | PREDICTED: filamin, alpha [Mus musculus]                                                        | 1818.9336 | 103.07 | 0.15707     |
| 136429   | VATVSLPR                   |                    | Trypsin precursor                                                                               | 842.5126  | 44.19  | 0           |
| 63540743 | VAVGQEQAQFSVNTR            |                    | PREDICTED: filamin C, gamma [Mus musculus]                                                      | 1505.7715 | 53.29  | 0.075427179 |
| 63476037 | VAVIQFSEDSK                |                    | PREDICTED: procollagen, type VI, alpha 3 [Mus musculus]                                         | 1222.6244 | 32.5   | 0           |
| 31982186 | VAVLGASGGIGQPLSLLLK        |                    | malate dehydrogenase 2, NAD (mitochondrial) [Mus musculus]                                      | 1793.0856 | 88.71  | 0.328350929 |
| 31982030 | VAVSADPNVNPVIVTR           |                    | Rho GDP dissociation inhibitor (GDI) alpha [Mus musculus]                                       | 1650.918  | 49.83  | 0.655568515 |
| 21704020 | VAVTPPGLAR                 |                    | NADH dehydrogenase (ubiquinone) Fe-S protein 1 [Mus musculus]                                   | 980.5914  | 39.74  | 0.219191061 |
| 6753484  | VAVVQYSQGQQQPGR            |                    | procollagen, type VI, alpha 1 [Mus musculus]                                                    | 1701.8722 | 89.09  | 0.169001073 |
| 63476037 | VAVVTYNNEVTTEIR            |                    | PREDICTED: procollagen, type VI, alpha 3 [Mus musculus]                                         | 1707.892  | 93.77  | 0           |
| 63556656 | VAYDLVYYVYR                |                    | PREDICTED: RIKEN cDNA A430096B05 gene [Mus musculus]                                            | 1260.6626 | 43.32  | 0.089520965 |
| 8567336  | VAYLQVPGTAK                |                    | chloride channel calcium activated 3 [Mus musculus]                                             | 1146.646  | 64.77  | 0.110364368 |
| 46849705 | VAYNPFPGPQQFFDLSIR         |                    | lectin, galactose binding, soluble 4 [Mus musculus]                                             | 1927.9777 | 79.13  | 0.396141166 |
| 31981824 | VAYTTVLQEWLR               |                    | ankyrin repeat domain 25 [Mus musculus]                                                         | 1478.8029 | 24.19  | 0           |
| 6724311  | VCLIGCGFSTGYGSAVK          |                    | alcohol dehydrogenase 1 (class I) [Mus musculus]                                                | 1661.7991 | 32.11  | 0           |
| 42415475 | VDATEESDLAQYGVYR           |                    | prolyl 4-hydroxylase, beta polypeptide [Mus musculus]                                           | 1780.8389 | 109.13 | 0.457387178 |
| 45598381 | VDCTADSDVCSAQGVYR          |                    | thioredoxin domain containing 5 [Mus musculus]                                                  | 1625.6925 | 90.51  | 1.285893671 |
| 6755817  | VDDEILGFISEATPR            |                    | thymopoietin [Mus musculus]                                                                     | 1661.8358 | 43.51  | 0           |
| 8394258  | VDDLLELYMGIR               |                    | semaF cytoplasmic domain associated protein 2 [Mus musculus]                                    | 1436.7469 | 25.1   | 0           |
| 54607098 | VDEYDYSKPIGQKQK            |                    | succinate dehydrogenase Fp subunit [Mus musculus]                                               | 1797.8669 | 86.15  | 0.179911045 |
| 31982186 | VDFPQDLATLTGR              |                    | malate dehydrogenase 2, NAD (mitochondrial) [Mus musculus]                                      | 1560.7931 | 57.51  | 0.235057576 |
| 9789893  | VDFPTAIGVLER               |                    | BRG1/brm-associated factor 53A [Mus musculus]                                                   | 1415.7888 | 44.07  | 0           |
| 63738313 | VDIDVPDVNIEGPDAAK          |                    | PREDICTED: similar to AHNAK [Mus musculus]                                                      | 1695.842  | 99.2   | 0.473369567 |
| 63738313 | VDIEAPDVSIIEGPEGK          |                    | PREDICTED: similar to AHNAK [Mus musculus]                                                      | 1654.8134 | 60.47  | 0           |
| 63738313 | VDIETPNLEGLTLGPK           |                    | PREDICTED: similar to AHNAK [Mus musculus]                                                      | 1683.8772 | 74.88  | 0.975914707 |
| 63476037 | VDIILNR                    |                    | PREDICTED: procollagen, type VI, alpha 3 [Mus musculus]                                         | 842.5109  | 33.55  | 0.075138628 |
| 6679503  | VDILDALLR                  |                    | proteasome (prosome, macropain) 26S subunit, ATPase 3 [Mus musculus]                            | 1124.6648 | 47.82  | 0.940231159 |
| 63738313 | VDINAPDVDVR                |                    | PREDICTED: similar to AHNAK [Mus musculus]                                                      | 1212.6234 | 29.99  | 0.753211244 |
| 63556656 | VDLPATVLTSSVSVR            |                    | PREDICTED: RIKEN cDNA A430096B05 gene [Mus musculus]                                            | 1456.8381 | 87.15  | 0           |
| 7106435  | VDLQDHGESAYAVYDR           |                    | tenascin C [Mus musculus]                                                                       | 1837.8357 | 73.72  | 0.277287633 |
| 20149728 | VDNSSLTGESEPPQAR           |                    | ATPase, H+/K+ transporting, nongastric, alpha polypeptide [Mus musculus]                        | 1589.7415 | 46.44  | 0.067928863 |
| 21450277 | VDNSSLTGESEPQTR            |                    | Na+/K+ -ATPase alpha 1 subunit [Mus musculus]                                                   | 1619.7555 | 108.18 | 0.337594612 |
| 51827543 | VDPLFTLLNGIR               |                    | PREDICTED: GCN1 general control of amino-acid synthesis 1-like 1 [Mus musculus]                 | 1486.8269 | 37.54  | 0           |
| 7710042  | VDQIQEIVTGNPTVIK           |                    | IQ motif containing GTPase activating protein 1 [Mus musculus]                                  | 1753.9642 | 36.79  | 0           |
| 6681087  | VDQSAVGFYEQGK              |                    | cortactin [Mus musculus]                                                                        | 1427.6787 | 88.16  | 0           |
| 6806903  | VDQSILTGESVSVIK            |                    | ATPase, Ca++ transporting, cardiac muscle, slow twitch 2 [Mus musculus]                         | 1574.8521 | 28.12  | 0           |
| 36031132 | VDQSILTGESVSVIK            |                    | ATPase, Ca++ transporting, fast twitch 1 [Mus musculus]                                         | 1574.8521 | 28.12  | 0           |
| 63655455 | VDQVQDIVTGNPTVIK           | 2 Deamidation (NQ) | PREDICTED: similar to Ras GTPase-activating-like protein IQGAP2 [Mus musculus]                  | 1727.8738 | 30.76  | 0           |
| 21704020 | VDSNDLCTEEIFPTEGAGTDLR     |                    | NADH dehydrogenase (ubiquinone) Fe-S protein 1 [Mus musculus]                                   | 2382.0925 | 69.39  | 0.280195592 |
| 33186863 | VDTWFNQPAR                 |                    | ribosomal protein L13 [Mus musculus]                                                            | 1233.6014 | 42.63  | 0.528069548 |
| 63522357 | VDVEALENSPGATYIR           |                    | PREDICTED: signal recognition particle 72 [Mus musculus]                                        | 1733.8706 | 49.75  | 0.389878567 |
| 6678573  | VDVFTANTSLSSGPLPFPLEQLVSK  |                    | villin 1 [Mus musculus]                                                                         | 2774.4475 | 33.23  | 0.339553452 |
| 63746482 | VDVGGKQDEFYTK              |                    | PREDICTED: filamin, alpha [Mus musculus]                                                        | 1364.6991 | 45.96  | 0.256764431 |
| 33859722 | VDVTEQGTLSGR               |                    | thioredoxin domain containing 1 [Mus musculus]                                                  | 1261.6433 | 55.71  | 0.731245009 |
| 7305295  | VDYNASAWLTK                |                    | myosin, heavy polypeptide 11, smooth muscle [Mus musculus]                                      | 1267.6267 | 79.18  | 0.134824649 |
| 28077103 | VEAYQWVSVSDGR              |                    | phospholipase A2, activating protein [Mus musculus]                                             | 1396.65   | 43.83  | 0           |
| 7305295  | VEDMAELTCLNEASVLHNLR       |                    | myosin, heavy polypeptide 11, smooth muscle [Mus musculus]                                      | 2257.0974 | 72.45  | 0.074124533 |
| 7305295  | VEDMAELTCLNEASVLHNLR       | Oxidation (M)      | myosin, heavy polypeptide 11, smooth muscle [Mus musculus]                                      | 2273.0942 | 23.43  | 0           |
| 6755204  | VEEAYDLAR                  |                    | proteasome (prosome, macropain) subunit, beta type 5 [Mus musculus]                             | 1065.5216 | 35.96  | 0.443351742 |
| 21313356 | VEEFSLPDALNEGQVQVR         |                    | zinc binding alcohol dehydrogenase, domain containing 1 [Mus musculus]                          | 2030.0054 | 77.09  | 0.617948737 |
| 31542333 | VEFEELCADLDFR              |                    | hypoxia up-regulated 1 [Mus musculus]                                                           | 1585.7289 | 86.72  | 0.401507838 |
| 21313536 | VEGGTPLFLLR                |                    | dihydrolipoamide S-succinyltransferase (E2 component of 2-oxo-glutarate complex) [Mus musculus] | 1189.6581 | 37.72  | 0.353172253 |
| 31543315 | VEGSEPTTFNLFIGNLNPDK       |                    | nucleolin [Mus musculus]                                                                        | 2288.1575 | 83.89  | 0.536552784 |
| 19526884 | VEGTPNDPNPNDPR             |                    | GDP-mannose pyrophosphorylase A [Mus musculus]                                                  | 1521.697  | 58.11  | 0.266309734 |
| 31981722 | VEIIANDQGGR                |                    | heat shock 70kD protein 5 (glucose-regulated protein) [Mus musculus]                            | 1228.6307 | 52.09  | 0.43015888  |
| 50080209 | VEIIANDQGGR                |                    | heat shock protein 1A [Mus musculus]                                                            | 1228.6307 | 52.09  | 0.43015888  |
| 7305163  | VEIIANDQGGR                |                    | heat shock protein 1-like [Mus musculus]                                                        | 1228.6307 | 52.09  | 0.43015888  |

|          |                              |                                                                                                  |           |        |             |
|----------|------------------------------|--------------------------------------------------------------------------------------------------|-----------|--------|-------------|
| 31981690 | VEIIANDQGNR                  | heat shock protein 8 [Mus musculus]                                                              | 1228.6307 | 52.09  | 0.43015888  |
| 63664182 | VEIIANDQGNR                  | PREDICTED: similar to heat shock protein 8 [Mus musculus]                                        | 1228.6307 | 52.09  | 0.43015888  |
| 51772153 | VELDNMPLR                    | PREDICTED: similar to Non-POU-domain-containing, octamer binding protein [Mus musculus]          | 1086.5577 | 34.17  | 0           |
| 6754558  | VELEQTYQAK                   | lamin B2 [Mus musculus]                                                                          | 1208.6078 | 28.95  | 0.59104388  |
| 33563250 | VELQELNDR                    | desmin [Mus musculus]                                                                            | 1115.5704 | 44.36  | 0.189474523 |
| 31982753 | VELQELNDR                    | vimentin [Mus musculus]                                                                          | 1115.5704 | 44.36  | 0.189474523 |
| 7305145  | VEMENQIYAIPEIDMR             | hexokinase 2 [Mus musculus]                                                                      | 1950.9355 | 42.92  | 1.014973238 |
| 6671666  | VENQENVSNLVDDTELK            | CAP, adenylate cyclase-associated protein 1 [Mus musculus]                                       | 2059.0166 | 113.32 | 0.378940693 |
| 63746482 | VEPGLGADNSVVR                | PREDICTED: filamin, alpha [Mus musculus]                                                         | 1312.6884 | 65.31  | 0.154345604 |
| 11230802 | VEQIAAIAQELNELDYDSHNVNTR     | actinin alpha 4 [Mus musculus]                                                                   | 2905.3943 | 40.7   | 0.310974115 |
| 20373167 | VEQLGAEGNVVEESQK             | LUC7-like 2 [Mus musculus]                                                                       | 1616.776  | 80.59  | 0           |
| 31542333 | VESVFETLVESPEEESTLTK         | hypoxia up-regulated 1 [Mus musculus]                                                            | 2368.1436 | 105.15 | 0.477709632 |
| 6755376  | VETFSGVYK                    | ribosomal protein S7 [Mus musculus]                                                              | 1029.5261 | 43.53  | 0           |
| 51873060 | VETGVLKPGMVTVPFAPVNVTEVK     | eukaryotic translation elongation factor 1 alpha 1 [Mus musculus]                                | 2515.3845 | 79.66  | 0.304857664 |
| 51873060 | VETGVLKPGMVTVPFAPVNVTEVK     | eukaryotic translation elongation factor 1 alpha 1 [Mus musculus]                                | 2531.3921 | 32.99  | 0.690403905 |
| 33859490 | VETLSQVEVILQQAADIAR          | laminin B1 subunit 1 [Mus musculus]                                                              | 2170.1682 | 45.14  | 0.330032782 |
| 31560653 | VFANAPDSACVIGLR              | phosphofruktokinase, liver, B-type [Mus musculus]                                                | 1532.7889 | 52.58  | 0.648563479 |
| 6755995  | VFASLPQVER                   | WD repeat domain 1 [Mus musculus]                                                                | 1145.6244 | 27.88  | 0.700867575 |
| 22203747 | VFAVVIDGR                    | procollagen, type VI, alpha 2 [Mus musculus]                                                     | 1076.6105 | 60.3   | 0           |
| 33859482 | VFDAIMNFR                    | eukaryotic translation elongation factor 2 [Mus musculus]                                        | 1112.5614 | 46.62  | 0           |
| 56699432 | VFDWIDANLNEQIASNLTVR         | eukaryotic translation initiation factor 4, gamma 1 isoform a [Mus musculus]                     | 2446.238  | 31.62  | 0.45224111  |
| 31980669 | VFEVSLADLQNDEVAFR            | ribosomal protein S3a [Mus musculus]                                                             | 1951.9717 | 37.06  | 0.40440863  |
| 6754254  | VFIMDNCEELIPEYLNFR           | heat shock protein 1, alpha [Mus musculus]                                                       | 2358.1484 | 42.3   | 0.488940649 |
| 40556608 | VFIMDSCDELIIPEYLNFR          | heat shock protein 1, beta [Mus musculus]                                                        | 2317.126  | 90.02  | 0.606828361 |
| 40556608 | VFIMDSCDELIIPEYLNFR          | heat shock protein 1, beta [Mus musculus]                                                        | 2333.1204 | 23.37  | 0.651782199 |
| 6755152  | VFLDPNTLSDDGTVALR            | prolyl endopeptidase [Mus musculus]                                                              | 1832.9412 | 47.19  | 0           |
| 21361209 | VFLENVIR                     | germinal histone H4 [Mus musculus]                                                               | 989.5836  | 45.15  | 0.411951746 |
| 18152793 | VFLLGEEVAQYDGAYK             | pyruvate dehydrogenase (lipoamide) beta [Mus musculus]                                           | 1801.9003 | 61     | 0           |
| 40254582 | VFLQYLPAIR                   | guanine nucleotide binding protein, alpha 13 [Mus musculus]                                      | 1219.7225 | 22.98  | 0           |
| 29789080 | VFNYNTLER                    | coatamer protein complex, subunit beta 2 (beta prime) [Mus musculus]                             | 1155.5822 | 29.48  | 0.457923577 |
| 6755787  | VFPGSTTEDYNLIVIER            | tripartite motif protein 28 [Mus musculus]                                                       | 1952.9785 | 22.91  | 0.265567565 |
| 6680572  | VFQSSTSQEQVYNDCAK            | kinesin family member 5B [Mus musculus]                                                          | 1933.8616 | 73.4   | 0.313668803 |
| 51093840 | VFSDEVQQQAQLSTIR             | eukaryotic translation initiation factor 3 subunit 6 interacting protein [Mus musculus]          | 1848.9467 | 62.93  | 0.423383792 |
| 6753484  | VFSVAITPDHLEPR               | procollagen, type VI, alpha 1 [Mus musculus]                                                     | 1580.8427 | 36.51  | 0.702437603 |
| 31981549 | VGAENVAIVEPSEK               | sulfide quinone reductase-like [Mus musculus]                                                    | 1469.7583 | 75.78  | 0.514993703 |
| 6755809  | VGAIPANALDDGQWSQGLISAAR      | talín 1 [Mus musculus]                                                                           | 2310.1797 | 59.04  | 0.189810659 |
| 6755478  | VGDVYIPR                     | splicing factor, arginine/serine-rich 2 [Mus musculus]                                           | 918.5043  | 62.19  | 0.551427813 |
| 51491880 | VGDYVVFENSSSNPYLVR           | metastasis-associated protein 2 [Mus musculus]                                                   | 2109.0061 | 49.25  | 0.318957521 |
| 51491845 | VGEQAQVVIIIDMNDPSNPIR        | clathrin, heavy polypeptide (Hc) [Mus musculus]                                                  | 2195.1194 | 58.4   | 0.424962607 |
| 6996917  | VGQFQYEGYK                   | glucose-6-phosphate dehydrogenase X-linked [Mus musculus]                                        | 1191.5659 | 24.93  | 0           |
| 31560737 | VGIGAFPTQDNEIGELQTR          | adenylosuccinate synthetase, non muscle [Mus musculus]                                           | 2287.1563 | 89.24  | 0.602267599 |
| 34740335 | VGINYQPPTVVPGGDLAK           | tubulin, alpha 2 [Mus musculus]                                                                  | 1824.9833 | 52.51  | 0.348395161 |
| 6678467  | VGINYQPPTVVPGGDLAK           | tubulin, alpha 4 [Mus musculus]                                                                  | 1824.9833 | 52.51  | 0.348395161 |
| 6678469  | VGINYQPPTVVPGGDLAK           | tubulin, alpha 6 [Mus musculus]                                                                  | 1824.9833 | 52.51  | 0.348395161 |
| 18079339 | VGLIGSCTNSSEYDMGR            | aconitase 2, mitochondrial [Mus musculus]                                                        | 1788.7936 | 89.64  | 0           |
| 6680117  | VGLLEALLPGQPEAVAR            | glutathione synthetase [Mus musculus]                                                            | 1732.9965 | 51.72  | 0.310680351 |
| 7657429  | VGLSDLYNGQILETIGGK           | osteoblast specific factor 2 (fasciclin I-like) [Mus musculus]                                   | 1876.993  | 73.37  | 0           |
| 23956082 | VGLTNYAAAYCTGLLLAR           | ribosomal protein L5 [Mus musculus]                                                              | 1869.9895 | 26.96  | 0.388044837 |
| 63476037 | VGLVQYNSDPTDEFFLR            | PREDICTED: procollagen, type VI, alpha 3 [Mus musculus]                                          | 1999.98   | 59.03  | 0.364993441 |
| 63476037 | VGLVQYNSDPTDEFFLR            | PREDICTED: procollagen, type VI, alpha 3 [Mus musculus]                                          | 2000.9583 | 73.85  | 0           |
| 6753620  | VGNLGLATSFNNER               | DEAD/H (Asp-Glu-Ala-Asp/His) box polypeptide 3, X-linked [Mus musculus]                          | 1524.7847 | 63.79  | 0.780240167 |
| 21312260 | VGNPFELDTQQGPQVKEQFER        | aldehyde dehydrogenase 1 family, member B1 [Mus musculus]                                        | 2561.2285 | 114.55 | 0.153212372 |
| 38090710 | VGQTAFDAVEDILGYLEELQK        | PREDICTED: protein phosphatase 1, regulatory (inhibitor) subunit 12A [Mus musculus]              | 2453.2021 | 72.32  | 0           |
| 63746482 | VGSAADIPINSETDLSSLTATVPPSPGR | PREDICTED: filamin, alpha [Mus musculus]                                                         | 2893.5562 | 114.62 | 0.069277461 |
| 46849705 | VGSSGDIALHLNPR               | lectin, galactose binding, soluble 4 [Mus musculus]                                              | 1435.7681 | 97.32  | 0.325924552 |
| 29126205 | VGVPTETGALTNR                | acetyl-Coenzyme A acyltransferase 2 (mitochondrial 3-oxoacyl-Coenzyme A thiolase) [Mus musculus] | 1427.788  | 52.37  | 0.266156125 |
| 63680429 | VGVSQQPEDSQQLPGER            | PREDICTED: plexin B2 [Mus musculus]                                                              | 1968.929  | 48.57  | 0.361559128 |
| 22203747 | VGVVQYSHEGTFEIR              | procollagen, type VI, alpha 2 [Mus musculus]                                                     | 1791.8976 | 25.35  | 0           |
| 11230802 | VGWEQLLTIAR                  | actinin alpha 4 [Mus musculus]                                                                   | 1386.7788 | 42.39  | 0.49295177  |
| 51491845 | VGYTPDWIFLLR                 | clathrin, heavy polypeptide (Hc) [Mus musculus]                                                  | 1479.8032 | 37.97  | 5.276915946 |

|          |                           |               |                                                                                                     |           |        |             |
|----------|---------------------------|---------------|-----------------------------------------------------------------------------------------------------|-----------|--------|-------------|
| 27754065 | VIAINVDDPAANYKDISDVER     |               | pyrophosphatase [Mus musculus]                                                                      | 2432.1997 | 69.18  | 0.875259011 |
| 6753322  | VIDPATATSVDLR             |               | chaperonin subunit 4 (delta) [Mus musculus]                                                         | 1357.7266 | 30.22  | 0           |
| 42734399 | VIDSLEDEKEALTLAMADR       |               | desmuslin isoform H [Mus musculus]                                                                  | 2119.0632 | 56.51  | 0           |
| 46559834 | VIDSLEDEKEALTLAMADR       |               | desmuslin isoform M [Mus musculus]                                                                  | 2119.0632 | 56.51  | 0           |
| 30348966 | VIESTQDLGNLDAGVMALQR      |               | spectrin beta 2 isoform 1 [Mus musculus]                                                            | 2130.0806 | 86.86  | 0.394707916 |
| 6754524  | VIGSGCNLDSAR              |               | lactate dehydrogenase 1, A chain [Mus musculus]                                                     | 1191.5831 | 65     | 0.429405622 |
| 51767637 | VIISAPSADAPMFVGMVNHKE     |               | PREDICTED: similar to Glyceraldehyde-3-phosphate dehydrogenase (GAPDH) [Mus musculus]               | 2213.1152 | 52.47  | 0           |
| 6679937  | VIISAPSADAPMFVGMVNHKE     |               | similar to glyceraldehyde-3-phosphate dehydrogenase [Mus musculus]                                  | 2213.1152 | 52.47  | 0           |
| 33469063 | VILQDFTGVPVAVDFAMR        |               | aconitase 1 [Mus musculus]                                                                          | 2049.0898 | 25.85  | 0.315511704 |
| 30023842 | VINQILTEMDGMSTK           |               | valosin containing protein [Mus musculus]                                                           | 1679.8284 | 34.06  | 1.343808764 |
| 6724311  | VIPLFSPQCCECR             |               | alcohol dehydrogenase 1 (class I) [Mus musculus]                                                    | 1448.71   | 43.49  | 0.271257892 |
| 51491845 | VIQCFSAETGQVQK            |               | clathrin, heavy polypeptide (Hc) [Mus musculus]                                                     | 1450.7301 | 54.62  | 0           |
| 7305085  | VIQLEGAFALVFK             |               | glutamine fructose-6-phosphate transaminase 1 [Mus musculus]                                        | 1562.8918 | 68.49  | 0.227773065 |
| 31981013 | VISAEALPGR                |               | methionine sulfoxide reductase A [Mus musculus]                                                     | 1141.6083 | 25.95  | 0           |
| 20137006 | VISGVQLGNIAFK             |               | myosin, heavy polypeptide 9, non-muscle [Mus musculus]                                              | 1458.8632 | 94.42  | 0           |
| 45597447 | VISLSEHSHIGR              |               | superoxide dismutase 1, soluble [Mus musculus]                                                      | 1367.766  | 49.55  | 0           |
| 6678321  | VISTITNNQIQIEIEDTFELR     |               | transforming growth factor, beta induced [Mus musculus]                                             | 2690.427  | 56.52  | 0.379785754 |
| 31982178 | VIVVGNPANTNCLTASK         |               | malate dehydrogenase 1, NAD (soluble) [Mus musculus]                                                | 1700.9004 | 95.56  | 0           |
| 41322904 | VLALPEPSPAAPTLR           |               | plectin 1 isoform 1 [Mus musculus]                                                                  | 1531.887  | 44.29  | 0.488163475 |
| 31982275 | VLATAFDITLGGGR            |               | heat shock protein 4 [Mus musculus]                                                                 | 1321.7087 | 66.36  | 0.70822829  |
| 11230802 | VLAVNQENEHLMEDYER         |               | actinin alpha 4 [Mus musculus]                                                                      | 2088.967  | 71.87  | 0.387641066 |
| 11230802 | VLAVNQENEHLMEDYER         | Oxidation (M) | actinin alpha 4 [Mus musculus]                                                                      | 2104.9663 | 22.08  | 0.815686558 |
| 6678449  | VLDASWYSPGTR              |               | thiosulfate sulfurtransferase, mitochondrial [Mus musculus]                                         | 1351.6665 | 51.12  | 0.443045652 |
| 51766008 | VLDNTWPAAPYR              |               | PREDICTED: myosin IA [Mus musculus]                                                                 | 1402.7131 | 29.91  | 0           |
| 15617203 | VDNYLTSLPEEVDETSAREEGISQR |               | chloride intracellular channel 1 [Mus musculus]                                                     | 3006.3977 | 77.54  | 0.454264339 |
| 63481281 | VLEDIQLNLFTR              |               | PREDICTED: glutamyl-prolyl-tRNA synthetase [Mus musculus]                                           | 1460.8108 | 62.76  | 0.619954321 |
| 40068493 | VLEEANQAINPK              |               | DEAD box polypeptide 17 isoform 1 [Mus musculus]                                                    | 1325.7035 | 59.42  | 0.906487612 |
| 13385408 | VLEQLTGQTPVFSK            |               | ribosomal protein L11 [Mus musculus]                                                                | 1546.8499 | 87.88  | 0           |
| 22128625 | VLEQPIVVQSVDGDR           |               | mitochondrial ribosomal protein L37 [Mus musculus]                                                  | 1696.9263 | 46.74  | 0.37327017  |
| 63489754 | VLETAEDIQER               |               | PREDICTED: similar to Spectrin alpha chain, brain (Spectrin, non-erythroid alpha chain) (Alpha-II s | 1302.6565 | 25.4   | 0           |
| 19923052 | VLEVPPIVYLR               |               | brain acyl-CoA hydrolase [Mus musculus]                                                             | 1297.7906 | 35.72  | 0.386701227 |
| 6754854  | VLFDITGLVNGR              |               | nidogen 1 [Mus musculus]                                                                            | 1230.6842 | 44.2   | 0.225582644 |
| 60218877 | VLGELWPLFGGR              |               | ATP-binding cassette, sub-family D, member 3 [Mus musculus]                                         | 1343.7557 | 32.94  | 0.663546903 |
| 27754065 | VLGILAMIDEGETDWK          |               | pyrophosphatase [Mus musculus]                                                                      | 1789.9047 | 93.09  | 0.793652611 |
| 27754065 | VLGILAMIDEGETDWK          | Oxidation (M) | pyrophosphatase [Mus musculus]                                                                      | 1805.8979 | 29.9   | 0           |
| 29336026 | VLGILLPEEITAMLR           |               | nonmuscle myosin heavy chain [Mus musculus]                                                         | 1554.8945 | 37.52  | 1.055499612 |
| 27804325 | VLGSQEALSPVHYEEK          |               | monoamine oxidase A [Mus musculus]                                                                  | 1785.9037 | 59.01  | 0.12863479  |
| 31982526 | VLIDWINDVLVGER            |               | parvin, alpha [Mus musculus]                                                                        | 1640.9027 | 40.72  | 0           |
| 21450625 | VLITDILLAR                |               | eukaryotic translation initiation factor 4A1 [Mus musculus]                                         | 1114.6862 | 24.23  | 0.486844532 |
| 6753484  | VLLFSDGNSQGATAEAIK        |               | procollagen, type VI, alpha 1 [Mus musculus]                                                        | 1949.978  | 100.38 | 0.094691343 |
| 63664073 | VLLLSSPGLEEFYR            |               | PREDICTED: p30 DBC protein [Mus musculus]                                                           | 1622.8732 | 26.02  | 0.666990811 |
| 6679291  | VLNNMEIGTSLYDEEGAK        |               | phosphoglycerate kinase 1 [Mus musculus]                                                            | 1982.9509 | 81.81  | 0           |
| 38080000 | VLNSYWVGEDSTYK            |               | PREDICTED: similar to ribosomal protein L15 [Mus musculus]                                          | 1660.783  | 77.9   | 0           |
| 9790067  | VLPAQATEYAFAFIQQVEDAR     |               | staphylococcal nuclease domain containing 1 [Mus musculus]                                          | 2579.2751 | 72.92  | 0.407971951 |
| 31560790 | VLPPVSTEGLTPDDVPALADSVR   |               | 1-acylglycerol-3-phosphate O-acyltransferase 1 [Mus musculus]                                       | 2348.2104 | 52.29  | 0.573697524 |
| 15426055 | VLQDLVMIDL                |               | coatamer protein complex, subunit beta 1 [Mus musculus]                                             | 1314.7498 | 37.18  | 0           |
| 31542333 | VQLINDNTATLSYGVFR         |               | hypoxia up-regulated 1 [Mus musculus]                                                               | 2095.1196 | 100.34 | 0.453723478 |
| 33186923 | VLQQLLVLQPEQQLNIYR        |               | CDP-diacylglycerol synthase 1 [Mus musculus]                                                        | 2195.2344 | 32.66  | 0           |
| 15426055 | VLSECSPLMNDIFNK           |               | coatamer protein complex, subunit beta 1 [Mus musculus]                                             | 1709.8401 | 30.53  | 0           |
| 6680748  | VLISGDGIAR                |               | ATP synthase, H+ transporting, mitochondrial F1 complex, alpha subunit, isoform 1 [Mus musculus]    | 1000.578  | 57.43  | 0.275278911 |
| 6754984  | VLSMAPGLTSVEIIPFR         |               | 3'-phosphoadenosine 5'-phosphosulfate synthase 2 [Mus musculus]                                     | 1830.0208 | 42.25  | 0           |
| 63556656 | VLSPLYFIR                 |               | PREDICTED: RIKEN cDNA A430096B05 gene [Mus musculus]                                                | 1123.6205 | 38.38  | 0.109100462 |
| 6755626  | VLSYAPGPLDNDMQLAR         |               | sepiapterin reductase [Mus musculus]                                                                | 1987.9901 | 37.16  | 0.569920613 |
| 10946574 | VLTPELYAELR               |               | creatine kinase, brain [Mus musculus]                                                               | 1303.7291 | 46.51  | 0.140160688 |
| 7657429  | VLTQIGTSIQDFLEAEDLSSFR    |               | osteoblast specific factor 2 (fasciclin I-like) [Mus musculus]                                      | 2584.2749 | 47.37  | 0.186634008 |
| 6857793  | VLTVTAVQENLMSALAEAR       |               | phosphoribosylglycinamide formyltransferase [Mus musculus]                                          | 2016.0792 | 23.58  | 0.354352047 |
| 6671702  | VLVDINNPELIQTAQ           |               | chaperonin subunit 5 (epsilon) [Mus musculus]                                                       | 1763.984  | 38.39  | 0.446115646 |
| 31542602 | VLVDQTTGLSR               |               | ELAV (embryonic lethal, abnormal vision, Drosophila)-like 1 (Hu antigen R) [Mus musculus]           | 1188.6592 | 44.87  | 0.339425307 |
| 42415475 | VLVGANFEEVAFDEK           |               | prolyl 4-hydroxylase, beta polypeptide [Mus musculus]                                               | 1666.8298 | 73.63  | 0.452002346 |
| 13569841 | VLVLDFTVPTPLGTR           |               | thioredoxin reductase 1 [Mus musculus]                                                              | 1627.9421 | 50.56  | 0.318020383 |



|          |                           |                                                                                                         |           |        |             |
|----------|---------------------------|---------------------------------------------------------------------------------------------------------|-----------|--------|-------------|
| 63655455 | VLWLDEIQQAINEANVDENR      | PREDICTED: similar to Ras GTPase-activating-like protein IQGAP2 [Mus musculus]                          | 2369.1687 | 62.17  | 0.401519248 |
| 13385010 | VLYAYGYTGDPSK             | microsomal glutathione S-transferase 3 [Mus musculus]                                                   | 1596.755  | 85.23  | 0.450025871 |
| 18079351 | VMAGDEWLFEKPGTYIPQK       | major vault protein [Mus musculus]                                                                      | 2138.0281 | 25.9   | 0.794905214 |
| 6680193  | VMEMFQPSAVVLQCGSDSLSGDR   | histone deacetylase 1 [Mus musculus]                                                                    | 2456.1401 | 26.56  | 0           |
| 6679567  | VMIYQDEVK                 | polymerase I and transcript release factor [Mus musculus]                                               | 1124.5625 | 26.36  | 0           |
| 6679078  | VMLGETNPADSKPGTIR         | nucleoside-diphosphate kinase 2 [Mus musculus]                                                          | 1785.9192 | 58.29  | 0           |
| 6755004  | VMPNAIVQSVGVSGGR          | programmed cell death 8 [Mus musculus]                                                                  | 1570.8369 | 30.71  | 0           |
| 34576561 | VMQQQQQATQQQLPQK          | splicing factor 3a, subunit 1 [Mus musculus]                                                            | 1911.973  | 62.25  | 0.578760032 |
| 34576561 | VMQQQQQATQQQLPQK          | splicing factor 3a, subunit 1 [Mus musculus]                                                            | 1927.96   | 29.2   | 0           |
| 6754994  | VMTIPYQMPASSVICAGGQDR     | poly(rC) binding protein 1 [Mus musculus]                                                               | 2418.1614 | 31.68  | 0           |
| 21313262 | VNCSDFEFTQALTAIPPELSTR    | inner membrane protein, mitochondrial [Mus musculus]                                                    | 2477.2107 | 23.26  | 0           |
| 45592932 | VNDSTMLGASGDYADFQYLK      | proteasome beta 4 subunit [Mus musculus]                                                                | 2195.0186 | 85.74  | 0           |
| 63607012 | VNEQLALR                  | PREDICTED: similar to centrosome protein cep290 [Mus musculus]                                          | 944.5052  | 28.38  | 0           |
| 31560611 | VNESTQNWHQLEIGNFIK        | calponin 1 [Mus musculus]                                                                               | 2271.1221 | 78.85  | 0           |
| 7305085  | VNFDDYTVNLGLK             | glutamine fructose-6-phosphate transaminase 1 [Mus musculus]                                            | 1554.7754 | 50.47  | 0           |
| 31560689 | VNFSPGDTSNLFPGTWYLER      | 3-hydroxy-3-methylglutaryl-Coenzyme A synthase 2 [Mus musculus]                                         | 2397.1528 | 87.97  | 0.347319947 |
| 33859482 | VNFTVDQIR                 | eukaryotic translation elongation factor 2 [Mus musculus]                                               | 1091.5862 | 46.72  | 0.513539468 |
| 6678752  | VNGEPLDLDPGQTLLIYVDEK     | lymphocyte antigen 74 [Mus musculus]                                                                    | 2378.1702 | 74.88  | 0.470107456 |
| 63556656 | VNGVLMALPVYLAGGR          | PREDICTED: RIKEN cDNA A430096B05 gene [Mus musculus]                                                    | 1629.9209 | 79.67  | 0           |
| 63556656 | VNGVLMALPVYLAGGR          | PREDICTED: RIKEN cDNA A430096B05 gene [Mus musculus]                                                    | 1645.9111 | 38.65  | 0.121828106 |
| 9790069  | VNIAFNYPMPEDSDTYLHR       | HLA-B-associated transcript 1A [Mus musculus]                                                           | 2300.0342 | 81.41  | 0.365886444 |
| 33859751 | VNLAIWDTAGGER             | RAB21, member RAS oncogene family [Mus musculus]                                                        | 1472.7534 | 52.58  | 0           |
| 42741690 | VNMSSGVSSNGVVDPR          | ubiquitin-conjugating enzyme E2 variant 1 [Mus musculus]                                                | 1604.769  | 24.97  | 0           |
| 6755965  | VNNSSLIGVGYQTLRPGVK       | voltage-dependent anion channel 2 [Mus musculus]                                                        | 2103.1536 | 23.95  | 0.371640384 |
| 6679439  | VNPTVFFDITADDEPLGR        | peptidylprolyl isomerase A [Mus musculus]                                                               | 2005.9928 | 96.59  | 0.495715452 |
| 6679651  | VNQIGSVTESIQACK           | enolase 3, beta muscle [Mus musculus]                                                                   | 1576.8003 | 95.55  | 0           |
| 63660302 | VNQPASFAIR                | PREDICTED: filamin B, beta [Mus musculus]                                                               | 1102.6013 | 32.86  | 1.610446145 |
| 63540743 | VNQPASFAVQLNGAR           | PREDICTED: filamin C, gamma [Mus musculus]                                                              | 1571.8296 | 61.05  | 0           |
| 63746482 | VNQPASFAVSLNGAK           | PREDICTED: filamin, alpha [Mus musculus]                                                                | 1502.7872 | 60.43  | 0           |
| 27229277 | VNTPTTTTVYR               | threonyl-tRNA synthetase [Mus musculus]                                                                 | 1151.6058 | 35.19  | 0.379377248 |
| 31981824 | VPAPFVSGPDPPEEIR          | ankyrin repeat domain 25 [Mus musculus]                                                                 | 1791.8781 | 71.16  | 0           |
| 13385168 | VPDFSDYR                  | ubiquinol-cytochrome c reductase, Rieske iron-sulfur polypeptide 1 [Mus musculus]                       | 998.4579  | 56.29  | 0.40326828  |
| 31542559 | VPEANSSWMDTVIR            | dihydropyrimidinase S-acetyltransferase (E2 component of pyruvate dehydrogenase complex) [Mus musculus] | 1604.7876 | 46.86  | 0           |
| 6755714  | VPENPPSMVFK               | transgelin [Mus musculus]                                                                               | 1244.6315 | 36.63  | 1.056017061 |
| 6753484  | VPNYQALLR                 | procollagen, type VI, alpha 1 [Mus musculus]                                                            | 1073.6093 | 38.52  | 0           |
| 29126205 | VPPETIDSVIVGNVMQSSDAAYLAR | acetyl-Coenzyme A acyltransferase 2 (mitochondrial 3-oxoacyl-Coenzyme A thiolase) [Mus musculus]        | 2179.365  | 58.3   | 0.166382681 |
| 9790073  | VPSDGLFLIGEYEGK           | cadherin 17 [Mus musculus]                                                                              | 1623.826  | 59.19  | 0.810420348 |
| 56119103 | VPSTEAALASSLMGLFEK        | guanosine diphosphate (GDP) dissociation inhibitor 3 [Mus musculus]                                     | 1979.9932 | 88.72  | 0           |
| 56119103 | VPSTEAALASSLMGLFEK        | guanosine diphosphate (GDP) dissociation inhibitor 3 [Mus musculus]                                     | 1995.9863 | 49.01  | 0.564030618 |
| 51767637 | VPTPNVSMDLTCR             | PREDICTED: similar to Glycerlaldehyde-3-phosphate dehydrogenase (GAPDH) [Mus musculus]                  | 1547.7654 | 53.24  | 0           |
| 63655497 | VPTPNVSVVDLTCR            | PREDICTED: similar to Glycerlaldehyde-3-phosphate dehydrogenase (GAPDH) [Mus musculus]                  | 1499.7877 | 111.37 | 0.609284022 |
| 6679937  | VPTPNVSVVDLTCR            | similar to glyceraldehyde-3-phosphate dehydrogenase [Mus musculus]                                      | 1499.7877 | 111.37 | 0.609284022 |
| 6754004  | VPTTGIEYPFDLENIIFR        | guanine nucleotide binding protein, alpha 11 [Mus musculus]                                             | 2237.1868 | 54.09  | 0.461177834 |
| 31542895 | VPTTGIEYPFDLENIIFR        | guanine nucleotide binding protein, alpha 14 [Mus musculus]                                             | 2237.1868 | 54.09  | 0.461177834 |
| 37537522 | VPDVAYQR                  | epiplakin 1 [Mus musculus]                                                                              | 1046.5587 | 57.34  | 0.344256958 |
| 63562740 | VPVESYVR                  | PREDICTED: similar to secreted gel-forming mucin [Mus musculus]                                         | 948.5182  | 49.8   | 0.233921621 |
| 46849705 | VPYVGALQGGTLVR            | lectin, galactose binding, soluble 4 [Mus musculus]                                                     | 1429.8312 | 115.8  | 0.586615717 |
| 6671700  | VQDDEVDGDTTSVTVLAAELLR    | chaperonin subunit 2 (beta) [Mus musculus]                                                              | 2288.1584 | 120.93 | 0           |
| 63552538 | VQVEVEPEDFGPVR            | PREDICTED: echinoderm microtubule associated protein like 2 [Mus musculus]                              | 1599.801  | 66.8   | 0.413355432 |
| 16716471 | VQGTGVTPTPLGTR            | hypothetical protein LOC94184 [Mus musculus]                                                            | 1577.8618 | 46.69  | 0.188611434 |
| 20532338 | VQIFEYNENTR               | sec13-like protein [Mus musculus]                                                                       | 1412.6838 | 23.33  | 0.358654987 |
| 31982520 | VQPIYGGTNEIMK             | acetyl-Coenzyme A dehydrogenase, long-chain [Mus musculus]                                              | 1449.739  | 23.65  | 4.366407262 |
| 6754256  | VQQTVDLFLGR               | heat shock protein 9A [Mus musculus]                                                                    | 1290.6808 | 67.48  | 0.614916041 |
| 41322904 | VQSGSESVIQEYVDLR          | plectin 1 isoform 1 [Mus musculus]                                                                      | 1808.8977 | 60.33  | 0.474226786 |
| 63746482 | VQVQDNMGCSVEATVK          | PREDICTED: filamin, alpha [Mus musculus]                                                                | 1705.8025 | 38.28  | 0           |
| 23956292 | VSAQGILTLDNQR             | C1 domain-containing phosphatase and tensin-like protein [Mus musculus]                                 | 1402.7161 | 40.78  | 0           |
| 63615219 | VSAQGILTLDNQR             | PREDICTED: tensin-like SH2 domain containing 1 [Mus musculus]                                           | 1402.7161 | 40.78  | 0           |
| 63474405 | VSAQGILTLDNQR             | PREDICTED: tensin [Mus musculus]                                                                        | 1402.7161 | 40.78  | 0           |
| 6680045  | VSCLGVTDDGMAVATGSWSDFLK   | guanine nucleotide-binding protein, beta-1 subunit [Mus musculus]                                       | 2359.0977 | 99.05  | 2.266142312 |
| 13937391 | VSCLGVTDDGMAVATGSWSDFLK   | guanine nucleotide-binding protein, beta-2 subunit [Mus musculus]                                       | 2359.0977 | 99.05  | 2.266142312 |

|          |                             |                  |                                                                                       |           |        |             |
|----------|-----------------------------|------------------|---------------------------------------------------------------------------------------|-----------|--------|-------------|
| 21312216 | VSDVVDGNIQGR                |                  | gasdermin domain containing 1 [Mus musculus]                                          | 1258.6432 | 47.64  | 0           |
| 37620153 | VSDVVDIEER                  |                  | myosin, light polypeptide kinase telokin isoform [Mus musculus]                       | 1224.5742 | 57.46  | 0.116627546 |
| 30348966 | VSEEAESQQWDTSK              |                  | spectrin beta 2 isoform 1 [Mus musculus]                                              | 1623.7142 | 63.91  | 0.236192232 |
| 7106421  | VSEEAESQQWDTSK              |                  | spectrin beta 2 isoform 2 [Mus musculus]                                              | 1623.7142 | 63.91  | 0.236192232 |
| 51770961 | VSEEIFFGR                   |                  | PREDICTED: AFG3(ATPase family gene 3)-like 2 [Mus musculus]                           | 1083.5493 | 39.27  | 0.362861941 |
| 63481281 | VSETVAFTDVSILR              |                  | PREDICTED: glutamyl-prolyl-tRNA synthetase [Mus musculus]                             | 1650.8634 | 38.65  | 0.39912834  |
| 6679439  | VSFELFADK                   |                  | peptidylprolyl isomerase A [Mus musculus]                                             | 1055.5405 | 53.55  | 0.432540504 |
| 31982373 | VSISEGDDKIEYR               |                  | fibrillarlin [Mus musculus]                                                           | 1510.7408 | 38.96  | 1.123681545 |
| 28916693 | VSNGAGSMSVSLVADENPFAQGALR   |                  | gelsolin [Mus musculus]                                                               | 2477.2153 | 54.37  | 0           |
| 28916693 | VSNGAGSMSVSLVADENPFAQGALR   | Deamidation (NQ) | gelsolin [Mus musculus]                                                               | 2478.1965 | 115.63 | 0           |
| 13384736 | VSPDMAIFITMNPYGAGR          |                  | dynein, cytoplasmic, heavy chain 1 [Mus musculus]                                     | 1939.9424 | 44.98  | 0           |
| 63474408 | VSPSIQPPQSQPTSLSR           |                  | PREDICTED: RIKEN cDNA E030037J05 gene [Mus musculus]                                  | 1937.0116 | 27.77  | 0.16770044  |
| 63556656 | VSQHGSDDVIETDFGLR           |                  | PREDICTED: RIKEN cDNA A430096B05 gene [Mus musculus]                                  | 1858.9303 | 42.01  | 0.142681668 |
| 51491845 | VSQPIEGHAASFAQFK            |                  | clathrin, heavy polypeptide (Hc) [Mus musculus]                                       | 1716.8573 | 25.44  | 0           |
| 31980636 | VSSQEDWAYNSR                |                  | mannosidase, beta A, lysosomal [Mus musculus]                                         | 1441.6411 | 25.33  | 0           |
| 38142460 | VSVISVEEPPQR                |                  | electron transferring flavoprotein, beta polypeptide [Mus musculus]                   | 1339.7247 | 42.82  | 0           |
| 63476037 | VSMANTPSPGPVEAFDFAEYQPELFEK |                  | PREDICTED: procollagen, type VI, alpha 3 [Mus musculus]                               | 3002.4497 | 51.95  | 0           |
| 31982169 | VSVVEPGNFIAATSLYSPEER       |                  | 3-hydroxybutyrate dehydrogenase (heart, mitochondrial) [Mus musculus]                 | 2136.0996 | 98     | 0.228073771 |
| 20149728 | VSWETDDINDLEDSSYGQEWTR      |                  | ATPase, H+/K+ transporting, nongastric, alpha polypeptide [Mus musculus]              | 2558.1057 | 92.24  | 0           |
| 63660302 | VSYFPTVPGVYIVSTK            |                  | PREDICTED: filamin B, beta [Mus musculus]                                             | 1756.9486 | 24.28  | 0.50885927  |
| 6753086  | VSYGIGEEEHQDEGR             |                  | apurinic/apryrimidinic endonuclease 1 [Mus musculus]                                  | 1704.7493 | 65.6   | 0.324176206 |
| 31543605 | VTAEVVLVHPGGGSTR            |                  | ribophorin I [Mus musculus]                                                           | 1665.8942 | 63.73  | 0           |
| 51317392 | VTAPCTPLR                   |                  | pleckstrin and Sec7 domain containing homolog [Mus musculus]                          | 957.5346  | 28.52  | 0           |
| 63746482 | VTAQGPGLEPSGNIANK           |                  | PREDICTED: filamin, alpha [Mus musculus]                                              | 1652.8605 | 108.25 | 0           |
| 13569841 | VTAQSTNSEETIEGFNTLLAVGR     |                  | thioredoxin reductase 1 [Mus musculus]                                                | 2665.3315 | 37.66  | 0.431317167 |
| 63660302 | VTASGPGLSAYGVPASLPVEFAIDAR  |                  | PREDICTED: filamin B, beta [Mus musculus]                                             | 2545.3274 | 54.97  | 0.562308409 |
| 31560353 | VTASSENFHVGENDENQER         |                  | solute carrier family 6 (neurotransmitter transporter), member 14 [Mus musculus]      | 2161.9392 | 98.51  | 0           |
| 13384736 | VTFVNFVTVR                  |                  | dynein, cytoplasmic, heavy chain 1 [Mus musculus]                                     | 1183.6475 | 29.51  | 0           |
| 18079351 | VTGEEWLVR                   |                  | major vault protein [Mus musculus]                                                    | 1088.5681 | 32.98  | 0.563792691 |
| 31981722 | VTHAVVTVPAYFNDAQR           |                  | heat shock 70kD protein 5 (glucose-regulated protein) [Mus musculus]                  | 1887.9746 | 71.64  | 0.433875513 |
| 20799907 | VTIAQGGVLPNIQAVLLPK         |                  | histone 2, H2aa1 [Mus musculus]                                                       | 1931.1724 | 109.07 | 0.495542507 |
| 34328142 | VTIASLPR                    |                  | lymphoid-restricted membrane protein [Mus musculus]                                   | 856.5231  | 25.51  | 0           |
| 63556656 | VTIPGNYYK                   |                  | PREDICTED: RIKEN cDNA A430096B05 gene [Mus musculus]                                  | 1054.5554 | 38.69  | 0           |
| 54607098 | VTLEYRVIDK                  |                  | succinate dehydrogenase Fp subunit [Mus musculus]                                     | 1332.7504 | 22.83  | 0           |
| 13385082 | VTLPDGHQLTFPNR              |                  | lectin, galactose-binding, soluble 2 [Mus musculus]                                   | 1594.8333 | 37.21  | 0.829743059 |
| 6754524  | VTLTPEEAR                   |                  | lactate dehydrogenase 1, A chain [Mus musculus]                                       | 1144.5883 | 26.58  | 0.313554753 |
| 6678413  | VTNGAFTGEISPGMIK            |                  | triosephosphate isomerase 1 [Mus musculus]                                            | 1621.821  | 23.88  | 0.777756115 |
| 8393150  | VTPPEGYDVVTVFR              |                  | carboxyl terminal LIM domain protein 1 [Mus musculus]                                 | 1578.8175 | 53.9   | 0.34894546  |
| 8393150  | VTPPEGYDVVTVFRE             |                  | carboxyl terminal LIM domain protein 1 [Mus musculus]                                 | 1707.859  | 35.82  | 0.385763959 |
| 6755963  | VTQSNFAVGYYK                |                  | voltage-dependent anion channel 1 [Mus musculus]                                      | 1213.6198 | 76.55  | 0.331234056 |
| 31657132 | VTTYPQTTR                   |                  | premature ovarian failure 1B [Mus musculus]                                           | 1179.6399 | 25.53  | 17.19210538 |
| 7305167  | VTVLEGLDILTQYLR             |                  | hydroxysteroid dehydrogenase-6, delta<5>-3-beta [Mus musculus]                        | 1734.92   | 26.71  | 0.271432528 |
| 6678499  | VTVVDVNEAR                  |                  | UDP-glucose dehydrogenase [Mus musculus]                                              | 1101.5883 | 39.67  | 0.341956948 |
| 31542413 | VTWSSFCAVNPR                |                  | coronin, actin binding protein 1C [Mus musculus]                                      | 1481.686  | 63.89  | 0.366723892 |
| 37537522 | VTYQELQDR                   |                  | epiplakin 1 [Mus musculus]                                                            | 1151.5696 | 28.27  | 0.337985407 |
| 63746482 | VTYTPMAPGSYLISIK            |                  | PREDICTED: filamin, alpha [Mus musculus]                                              | 1740.9086 | 70.35  | 0.364394432 |
| 63746482 | VTYTPMAPGSYLISIK            | Oxidation (M)    | PREDICTED: filamin, alpha [Mus musculus]                                              | 1756.905  | 48.95  | 0           |
| 6754084  | VTYVDFLAYDILDQYR            |                  | glutathione S-transferase, mu 1 [Mus musculus]                                        | 1993.9916 | 66.42  | 0.302909559 |
| 58037117 | VVAEPVELAQEFR               |                  | NADH dehydrogenase (ubiquinone) Fe-S protein 3 [Mus musculus]                         | 1486.7893 | 38.38  | 0.407551571 |
| 6755809  | VVAPTISSPVCQEQLVEAGR        |                  | talin 1 [Mus musculus]                                                                | 2083.0852 | 58.94  | 0.187597464 |
| 6671664  | VVDDWANDGWGLK               |                  | calnexin [Mus musculus]                                                               | 1474.6996 | 57.68  | 0.545116577 |
| 31980648 | VVDLLAPYAK                  |                  | ATP synthase, H+ transporting mitochondrial F1 complex, beta subunit [Mus musculus]   | 1088.6262 | 42.26  | 0.369688936 |
| 63561841 | VVDLMAYMASK                 |                  | PREDICTED: similar to Glyceraldehyde-3-phosphate dehydrogenase (GAPDH) [Mus musculus] | 1227.6107 | 49.84  | 0.419006819 |
| 6679937  | VVDLMAYMASK                 |                  | similar to glyceraldehyde-3-phosphate dehydrogenase [Mus musculus]                    | 1227.6107 | 49.84  | 0.419006819 |
| 46593021 | VVELLADIVQNSSLEDSQIEK       |                  | ubiquinol-cytochrome c reductase core protein 1 [Mus musculus]                        | 2329.2085 | 97.36  | 0.347416794 |
| 63476037 | VVESLDVGPDR                 |                  | PREDICTED: procollagen, type VI, alpha 3 [Mus musculus]                               | 1185.6125 | 46.4   | 0.19150241  |
| 6671549  | VVFIFGPDK                   |                  | peroxiredoxin 6 [Mus musculus]                                                        | 1021.5681 | 40.13  | 0.119904108 |
| 46849705 | VVFNTMQSGQWQK               |                  | lectin, galactose binding, soluble 4 [Mus musculus]                                   | 1481.7239 | 72.87  | 0           |
| 46849705 | VVFNTMQSGQWQK               | Oxidation (M)    | lectin, galactose binding, soluble 4 [Mus musculus]                                   | 1497.7025 | 41.86  | 0           |
| 20137006 | VVFQEFR                     |                  | myosin, heavy polypeptide 9, non-muscle [Mus musculus]                                | 924.4946  | 27.61  | 0.530119075 |

|          |                        |                  |                                                                                                     |           |        |             |
|----------|------------------------|------------------|-----------------------------------------------------------------------------------------------------|-----------|--------|-------------|
| 6753036  | VVGPNPFDSR             |                  | aldehyde dehydrogenase 2, mitochondrial [Mus musculus]                                              | 990.5032  | 49.37  | 0.315112    |
| 6679237  | VVHSYEELEENYTR         |                  | pyruvate carboxylase [Mus musculus]                                                                 | 1767.8229 | 41.36  | 0           |
| 63476037 | VVIHFTDGDGDMADLYR      |                  | PREDICTED: procollagen, type VI, alpha 3 [Mus musculus]                                             | 1994.9203 | 49.83  | 0           |
| 6678413  | VVLAYPEVVAIGTGK        |                  | triosephosphate isomerase 1 [Mus musculus]                                                          | 1602.8831 | 56.16  | 0           |
| 6680309  | VVLDKDYFLFR            |                  | heat shock protein 1 (chaperonin 10) [Mus musculus]                                                 | 1529.7999 | 40.62  | 0           |
| 42475998 | VVLEGPAPWGFR           |                  | PDZ and LIM domain 7 [Mus musculus]                                                                 | 1327.7191 | 44.38  | 0           |
| 34538601 | VVLPMEPIR              |                  | cytochrome c oxidase subunit II [Mus musculus]                                                      | 1166.7045 | 27.07  | 0           |
| 7305169  | VVNVLPVEANLVQWLR       |                  | heat shock protein 105 [Mus musculus]                                                               | 2035.1311 | 22.36  | 0.548669942 |
| 16716371 | VVPSDLYPLVLR           |                  | nucleolar and coiled-body phosphoprotein 1 [Mus musculus]                                           | 1370.801  | 25.82  | 0           |
| 26006861 | VVPVADIITPNQFEALLSGR   |                  | pyridoxal (pyridoxine, vitamin B6) kinase [Mus musculus]                                            | 2268.2241 | 36.96  | 0           |
| 19527092 | VVQVSAGDSHTAALTEDGR    |                  | chromosome condensation 1 [Mus musculus]                                                            | 1912.9436 | 73.26  | 0           |
| 6678329  | VVSAMVNCNDDQGVLLGR     |                  | transglutaminase 2, C polypeptide [Mus musculus]                                                    | 1889.9187 | 46.06  | 0           |
| 18152793 | VVSPWNSEDAK            |                  | pyruvate dehydrogenase (lipoamide) beta [Mus musculus]                                              | 1231.5886 | 42.47  | 0           |
| 7305295  | VVSSVLQLGNIVFK         |                  | myosin, heavy polypeptide 11, smooth muscle [Mus musculus]                                          | 1502.8959 | 96.31  | 0.123878112 |
| 51556274 | VVTIAPGLFATPLLTPEK     |                  | hydroxyacyl-Coenzyme A dehydrogenase type II [Mus musculus]                                         | 2081.219  | 61.37  | 0.403994344 |
| 51766008 | VVTVLNVTQAQYAR         |                  | PREDICTED: myosin IA [Mus musculus]                                                                 | 1561.8693 | 46.34  | 0.257121498 |
| 46849705 | VVVNGNSFYEYGHR         |                  | lectin, galactose binding, soluble 4 [Mus musculus]                                                 | 1640.7854 | 69.17  | 0.326456045 |
| 46849705 | VVVNGNSFYEYGHR         | Deamidation (NQ) | lectin, galactose binding, soluble 4 [Mus musculus]                                                 | 1641.7668 | 22.29  | 0.463450728 |
| 63556656 | VVVTAGQVVGLAR          |                  | PREDICTED: RIKEN cDNA A430096B05 gene [Mus musculus]                                                | 1367.8402 | 35.48  | 0           |
| 6754854  | VVYWTDISEPSIGR         |                  | nidogen 1 [Mus musculus]                                                                            | 1621.8135 | 37.46  | 0.161820559 |
| 7305363  | VWDYETGDFER            |                  | platelet-activating factor acetylhydrolase, isoform 1b, beta1 subunit [Mus musculus]                | 1416.6184 | 45.36  | 0.495796682 |
| 6677773  | VWLDPNETNEIANANSR      |                  | ribosomal protein L19 [Mus musculus]                                                                | 1942.9275 | 78.93  | 0.393088059 |
| 6680047  | VWQVTIGTR              |                  | guanine nucleotide binding protein (G protein), beta polypeptide 2 like 1 [Mus musculus]            | 1059.5941 | 53.91  | 0.49961978  |
| 31543474 | VYAEANSQESADR          |                  | phosphoglucomutase 3 [Mus musculus]                                                                 | 1439.6409 | 32.57  | 0.359251138 |
| 46593021 | VYEEDAVPLGTPCR         |                  | ubiquinol-cytochrome c reductase core protein 1 [Mus musculus]                                      | 1548.7328 | 67.21  | 0.437511667 |
| 63481281 | VYEELLAIPVVR           |                  | PREDICTED: glutamyl-prolyl-tRNA synthetase [Mus musculus]                                           | 1400.8169 | 53.74  | 0.405380083 |
| 6755142  | VYFDLQIGDESIVGR        |                  | peptidylprolyl isomerase B [Mus musculus]                                                           | 1597.783  | 79.99  | 0.463811943 |
| 41322904 | VYHDPSTQEPVTSYLQQR     |                  | plectin 1 isoform 1 [Mus musculus]                                                                  | 2276.0935 | 33.72  | 0.536242866 |
| 33563270 | VYYDLTR                |                  | oxoglutarate dehydrogenase (lipoamide) [Mus musculus]                                               | 929.4731  | 29.58  | 0.30756078  |
| 42734399 | WAEDQALYAEEAR          |                  | desmuslin isoform H [Mus musculus]                                                                  | 1551.7118 | 65.86  | 0           |
| 46559834 | WAEDQALYAEEAR          |                  | desmuslin isoform M [Mus musculus]                                                                  | 1551.7118 | 65.86  | 0           |
| 30023842 | WALSQSNPSALR           |                  | valosin containing protein [Mus musculus]                                                           | 1329.6912 | 72.23  | 0.699440387 |
| 21313526 | WAVIQSQAVR             |                  | hypothetical protein LOC78906 [Mus musculus]                                                        | 1157.644  | 33.23  | 1.093880358 |
| 6754984  | WDDGLDQYR              |                  | 3'-phosphoadenosine 5'-phosphosulfate synthase 2 [Mus musculus]                                     | 1167.5139 | 42.49  | 0.553972309 |
| 31981892 | WDDPYDIAR              |                  | Rho GTPase activating protein 1 [Mus musculus]                                                      | 1313.5829 | 34.45  | 0.660467821 |
| 6680960  | WDPAAGVQYR             |                  | procollagen, type XII, alpha 1 [Mus musculus]                                                       | 1413.6843 | 34.72  | 0.570056019 |
| 14042921 | WDQADQTPGATPK          |                  | splicing factor 3b, subunit 1 [Mus musculus]                                                        | 1515.7103 | 58.55  | 3.425096032 |
| 9910482  | WDSNVITFDIAR           |                  | START domain containing 10 [Mus musculus]                                                           | 1565.7592 | 28.15  | 0           |
| 1346343  | WELLQVDTSTR            |                  | Keratin, type II cytoskeletal 1 (Cytokeratin 1) (K1) (CK 1) (67 kDa cytokeratin) (Hair alpha protei | 1475.7361 | 64.55  | 0.203863038 |
| 63746482 | WGDEHIPGSPYR           |                  | PREDICTED: filamin, alpha [Mus musculus]                                                            | 1413.6572 | 73.95  | 0.201890735 |
| 63540743 | WGDESVPGSPFK           |                  | PREDICTED: filamin C, gamma [Mus musculus]                                                          | 1305.6034 | 25.22  | 0           |
| 29293809 | WGDIFFPPFGR            |                  | ATP citrate lyase [Mus musculus]                                                                    | 1417.6918 | 61     | 0.339473546 |
| 63561841 | WGEAGAEYVVESTGVFTTMEK  |                  | PREDICTED: similar to Glyceraldehyde-3-phosphate dehydrogenase (GAPDH) [Mus musculus]               | 2291.0608 | 53.6   | 0.663318078 |
| 6679937  | WGEAGAEYVVESTGVFTTMEK  |                  | similar to glyceraldehyde-3-phosphate dehydrogenase [Mus musculus]                                  | 2291.0608 | 53.6   | 0.663318078 |
| 63561841 | WGEAGAEYVVESTGVFTTMEK  | Oxidation (M)    | PREDICTED: similar to Glyceraldehyde-3-phosphate dehydrogenase (GAPDH) [Mus musculus]               | 2307.0747 | 32.8   | 1.008667935 |
| 6679937  | WGEAGAEYVVESTGVFTTMEK  | Oxidation (M)    | similar to glyceraldehyde-3-phosphate dehydrogenase [Mus musculus]                                  | 2307.0747 | 32.8   | 1.008667935 |
| 31981302 | WGTEAQFIYILGNR         |                  | annexin A6 [Mus musculus]                                                                           | 1782.881  | 44.91  | 0           |
| 31559916 | WGTLTDCVVMR            |                  | heterogeneous nuclear ribonucleoprotein A3 isoform b [Mus musculus]                                 | 1280.613  | 58.01  | 0           |
| 8567336  | WGVFNEYNNDK            |                  | chloride channel calcium activated 3 [Mus musculus]                                                 | 1514.6566 | 81.49  | 0           |
| 31543942 | WIDNPTVDDR             |                  | vinculin [Mus musculus]                                                                             | 1230.5811 | 39.42  | 0           |
| 6996913  | WISIMTER               |                  | annexin A2 [Mus musculus]                                                                           | 1035.5297 | 35.11  | 0.500973457 |
| 9790109  | WLAPDGLIFPDR           |                  | heterogeneous nuclear ribonucleoproteins methyltransferase-like 2 [Mus musculus]                    | 1399.743  | 33.03  | 0.818927308 |
| 51491845 | WLLLTGISAQQNR          |                  | clathrin, heavy polypeptide (Hc) [Mus musculus]                                                     | 1499.8398 | 38.97  | 0           |
| 7709980  | WLNENAVEK              |                  | S-adenosylhomocysteine hydrolase [Mus musculus]                                                     | 1102.5538 | 42.78  | 0           |
| 6754136  | WMEQEGPEYWFR           |                  | histocompatibility 2, Q region locus 2 [Mus musculus]                                               | 1639.6908 | 30.89  | 0.962102183 |
| 6755965  | WNTDNTLGTEIAIEDQICQGLK |                  | voltage-dependent anion channel 2 [Mus musculus]                                                    | 2462.1936 | 42.88  | 0           |
| 6755963  | WNTDNTLGTEITVEDQLAR    |                  | voltage-dependent anion channel 1 [Mus musculus]                                                    | 2176.051  | 143.79 | 0.3400114   |
| 41322904 | WQAVLAQTDVDR           |                  | plectin 1 isoform 1 [Mus musculus]                                                                  | 1286.6841 | 38.76  | 0           |
| 39204553 | WQDIQNDR               |                  | chromodomain helicase DNA binding protein 4 [Mus musculus]                                          | 1171.5519 | 22.72  | 0.868034022 |
| 24762230 | WQNLLPSR               |                  | ribosomal protein S15a [Mus musculus]                                                               | 1127.5978 | 24.27  | 0           |

|          |                            |                    |                                                                                                     |           |        |             |
|----------|----------------------------|--------------------|-----------------------------------------------------------------------------------------------------|-----------|--------|-------------|
| 25020120 | WQSQLGGLGQDLGDLR           |                    | PREDICTED: laminin, alpha 5 [Mus musculus]                                                          | 2029.0122 | 60.59  | 0.895231667 |
| 58000405 | WRVGGDDPYKLYAFNR           | 2 Deamidation (NQ) | UDP-N-acetyl-alpha-D-galactosamine:polypeptide N-acetylglucosaminyltransferase 14 [Mus musculus]    | 2029.9559 | 24.81  | 0           |
| 34328278 | WSELAGCTADFR               |                    | lectin, mannose-binding 2 [Mus musculus]                                                            | 1355.6105 | 27.15  | 0.335738341 |
| 31982720 | WSFEELGLLSR                |                    | SA rat hypertension-associated homolog [Mus musculus]                                               | 1336.6954 | 26.07  | 0.26712835  |
| 13385384 | WSTLVEDYGVLEL              |                    | proteasome 26S non-ATPase subunit 12 [Mus musculus]                                                 | 1566.7813 | 32.7   | 0.395109954 |
| 6755963  | WTEYGLTFTEK                |                    | voltage-dependent anion channel 1 [Mus musculus]                                                    | 1374.6545 | 75.76  | 0.660037492 |
| 27804325 | WVDVGGAYVGTQNR             |                    | monoamine oxidase A [Mus musculus]                                                                  | 1618.7976 | 100.75 | 0.231728158 |
| 7657031  | WVEQNLGPEFVER              |                    | 5',3'-nucleotidase, cytosolic [Mus musculus]                                                        | 1602.7917 | 29.89  | 0           |
| 6671702  | WVGPEIELIAIATGGR           |                    | chaperonin subunit 5 (epsilon) [Mus musculus]                                                       | 1738.9469 | 36.12  | 0           |
| 21450277 | WVNDVEDSYGQQWYEQR          |                    | Na+/K+ -ATPase alpha 1 subunit [Mus musculus]                                                       | 2302.9949 | 105.68 | 0.287395161 |
| 46195798 | WVPFDGDDIQLFEVR            |                    | dolichyl-di-phosphooligosaccharide-protein glycotransferase [Mus musculus]                          | 1835.895  | 34.09  | 0.360733288 |
| 18079339 | WVIGDENYEGGSSR             |                    | aconitase 2, mitochondrial [Mus musculus]                                                           | 1667.7651 | 115.67 | 0           |
| 31981549 | YADALQEIR                  |                    | sulfide quinone reductase-like [Mus musculus]                                                       | 1191.6393 | 52.76  | 0.404970271 |
| 63506192 | YADLTEDQLPSCESLKDITAR      |                    | PREDICTED: similar to phosphoglycerate mutase (EC 5.4.2.1) B chain - rat [Mus musculus]             | 2368.1143 | 53.14  | 0.247007202 |
| 31981983 | YAEELQVLR                  |                    | stromal interaction molecule 1 [Mus musculus]                                                       | 1265.6018 | 44.98  | 0           |
| 6754854  | YALSNSIGPVR                |                    | nidogen 1 [Mus musculus]                                                                            | 1176.6294 | 27.1   | 0           |
| 9790219  | YALYDASFETK                |                    | destrian [Mus musculus]                                                                             | 1307.6118 | 78.37  | 0.240531415 |
| 6680924  | YALYDATYETK                |                    | cofilin 1, non-muscle [Mus musculus]                                                                | 1337.6245 | 67.78  | 0.605214334 |
| 6671746  | YALYDATYETK                |                    | cofilin 2, muscle [Mus musculus]                                                                    | 1337.6245 | 67.78  | 0.605214334 |
| 13195624 | YAPGYNNAEVGDK              |                    | NADH dehydrogenase (ubiquinone) 1 alpha subcomplex 10 [Mus musculus]                                | 1283.5928 | 49.25  | 0           |
| 23510269 | YAQGADSVPEMFR              |                    | eukaryotic translation initiation factor 2C, 1 [Mus musculus]                                       | 1470.6689 | 24.78  | 0           |
| 34147260 | YASASEPTEIYR               |                    | hypothetical protein LOC270328 [Mus musculus]                                                       | 1386.6571 | 68.07  | 0.115928724 |
| 29244560 | YASASEPTEIYR               |                    | hypothetical protein LOC331063 [Mus musculus]                                                       | 1386.6571 | 68.07  | 0.115928724 |
| 31560449 | YASNAVSESMIR               |                    | aspartyl aminopeptidase [Mus musculus]                                                              | 1327.6362 | 23.09  | 0           |
| 7657518  | YDDPPDWQEILTFR             |                    | ATP-binding cassette, subfamily E, member 1 [Mus musculus]                                          | 1957.902  | 46.83  | 0.407576954 |
| 41054806 | YDEAASYIQSK                |                    | guanine nucleotide binding protein, alpha inhibiting 2 [Mus musculus]                               | 1274.6094 | 44.98  | 0.279449065 |
| 26190606 | YDFGIYDDPEITLER            |                    | ER-resident protein ERdj5 [Mus musculus]                                                            | 2073.9658 | 30.75  | 0.396162722 |
| 6678483  | YDGQVAVFGSDFQEK            |                    | ubiquitin-activating enzyme E1, Chr X [Mus musculus]                                                | 1689.7747 | 79.57  | 0           |
| 31981549 | YDGYTSCPLVVTGYNR           |                    | sulfide quinone reductase-like [Mus musculus]                                                       | 1708.7634 | 37.38  | 0.538252214 |
| 6753262  | YDPPLEDGAMPASAR            |                    | capping protein (actin filament) muscle Z-line, beta [Mus musculus]                                 | 1518.6898 | 23.1   | 1.061981168 |
| 13386338 | YDPTIEDFYR                 |                    | RAP2B, member of RAS oncogene family [Mus musculus]                                                 | 1318.6088 | 41.59  | 0.55295346  |
| 33859753 | YDPTIEDSYR                 |                    | RAS related protein 1b [Mus musculus]                                                               | 1258.559  | 57.79  | 0.29309223  |
| 21312564 | YDQQAEDLR                  |                    | calponin 3, acidic [Mus musculus]                                                                   | 1266.5649 | 49.84  | 1.710274396 |
| 6755594  | YDWDLLAAR                  |                    | U5 small nuclear ribonucleoprotein [Mus musculus]                                                   | 1122.564  | 23.47  | 1.032012856 |
| 6754180  | YEAFAQDQETFER              |                    | hephaestin [Mus musculus]                                                                           | 1562.7008 | 23.74  | 2.029674585 |
| 6679545  | YEDAVQFIR                  |                    | protein tyrosine phosphatase 4a2 [Mus musculus]                                                     | 1140.5715 | 43.63  | 0.874322055 |
| 21313144 | YEDFKDEGSENAVK             |                    | GTP-binding protein PTD004 [Mus musculus]                                                           | 1630.7241 | 85.82  | 0.619603074 |
| 16716471 | YEDFVVDFGNFLVYLNK          |                    | hypothetical protein LOC94184 [Mus musculus]                                                        | 1821.8733 | 74.47  | 0.295767168 |
| 27370092 | YEEIDNAPUER                |                    | Tu translation elongation factor, mitochondrial [Mus musculus]                                      | 1364.5984 | 68.58  | 0.318938884 |
| 1346343  | YEELQITAGR                 |                    | Keratin, type II cytoskeletal 1 (Cytokeratin 1) (K1) (67 kDa cytokeratin) (Hair alpha protei        | 1179.599  | 33.55  | 0           |
| 13624315 | YEELQTLAGK                 |                    | keratin complex 2, basic, gene 8 [Mus musculus]                                                     | 1151.593  | 85.14  | 0.704210112 |
| 7657583  | YEGFFGLYR                  |                    | solute carrier family 25 (mitochondrial carrier, adenine nucleotide translocator), member 13 [Mus m | 1151.5594 | 25.28  | 0.301010601 |
| 27369581 | YEGFFGLYR                  |                    | solute carrier family 25 (mitochondrial carrier, Aralar), member 12 [Mus musculus]                  | 1151.5594 | 25.28  | 0.301010601 |
| 16716471 | YEHANDDTSLKSDPEGEK         |                    | hypothetical protein LOC94184 [Mus musculus]                                                        | 2149.9087 | 24.82  | 0.64414225  |
| 7305295  | YEILANAIPIK                |                    | myosin, heavy polypeptide 11, smooth muscle [Mus musculus]                                          | 1202.6736 | 68.55  | 0           |
| 21313640 | YESIIATLCENLDSLDEPDAR      |                    | adaptor-related protein complex 2, beta 1 subunit [Mus musculus]                                    | 2367.1187 | 23.99  | 0           |
| 13385998 | YESSALPAGQLTSLPDYASR       |                    | TNF receptor-associated protein 1 [Mus musculus]                                                    | 2126.0381 | 67.71  | 0.607085433 |
| 33859482 | YEWVVAEAR                  |                    | eukaryotic translation elongation factor 2 [Mus musculus]                                           | 1138.5194 | 69     | 0.550196417 |
| 51764087 | YFAGNLSGGAAGATSLCFVYPLDFAR |                    | PREDICTED: solute carrier family 25 (mitochondrial carrier, adenine nucleotide translocator), membe | 2739.3206 | 54.39  | 0.235259513 |
| 22094075 | YFAGNLSGGAAGATSLCFVYPLDFAR |                    | solute carrier family 25, member 5 [Mus musculus]                                                   | 2739.3206 | 54.39  | 0.235259513 |
| 6679761  | YFDAATAEYVQK               |                    | fructose biphosphatase 2 [Mus musculus]                                                             | 1405.6631 | 53.01  | 0.501060446 |
| 27370516 | YFDLGLPNR                  |                    | isocitrate dehydrogenase 2 (NADP+), mitochondrial [Mus musculus]                                    | 1094.5676 | 41.45  | 0.270279965 |
| 31541909 | YFGDIISVGQR                |                    | isochorimatase domain containing 1 [Mus musculus]                                                   | 1254.6538 | 34.66  | 0.342826242 |
| 6678055  | YFILPDSLPLDITLLVDVEPK      |                    | small nuclear ribonucleoprotein D1 [Mus musculus]                                                   | 2287.2468 | 56.39  | 0.420015704 |
| 51764087 | YFPTQALNFAFK               |                    | PREDICTED: solute carrier family 25 (mitochondrial carrier, adenine nucleotide translocator), membe | 1446.7426 | 69.73  | 0.394134352 |
| 22094075 | YFPTQALNFAFK               |                    | solute carrier family 25, member 5 [Mus musculus]                                                   | 1446.7426 | 69.73  | 0.394134352 |
| 23621467 | YFQFQEEGKEGENR             |                    | PREDICTED: actin related protein 2/3 complex, subunit 2 [Mus musculus]                              | 1760.788  | 55     | 0           |
| 47059123 | YFSLPSVVFSR                |                    | UDP glucuronosyltransferase 1 family, polypeptide A10 [Mus musculus]                                | 1301.6919 | 51.47  | 0.445679282 |
| 6679891  | YFTWDPTR                   |                    | alpha glucosidase 2 alpha neutral subunit [Mus musculus]                                            | 1085.5071 | 28.38  | 0.434925018 |
| 46593021 | YFYDQCQPAVAGYPIQLPDYNR     |                    | ubiquinol-cytochrome c reductase core protein 1 [Mus musculus]                                      | 2679.2266 | 103.77 | 0.286375389 |

|          |                          |                                                                                                      |           |        |             |
|----------|--------------------------|------------------------------------------------------------------------------------------------------|-----------|--------|-------------|
| 18266680 | YGDLANWMIPGK             | 3-oxoacid CoA transferase 1 [Mus musculus]                                                           | 1364.6621 | 26.74  | 0           |
| 54261793 | YGDLLPADGILIQGNDLK       | plasma membrane calcium ATPase 4 [Mus musculus]                                                      | 1915.0106 | 42.47  | 0           |
| 51765817 | YGDLLPADGILIQGNDLK       | PREDICTED: plasma membrane calcium ATPase 1 [Mus musculus]                                           | 1915.0106 | 42.47  | 0           |
| 23956214 | YGEPEGVFINFK             | splicing factor proline/glutamine rich (polypyrimidine tract binding protein associated) [Mus muscu] | 1252.6193 | 49.49  | 0           |
| 6680193  | YGEYFPGTGDRL             | histone deacetylase 1 [Mus musculus]                                                                 | 1374.6385 | 62.77  | 0.385625296 |
| 63746482 | YGGDEIPFSPYR             | PREDICTED: filamin, alpha [Mus musculus]                                                             | 1400.6559 | 47.55  | 0.185323028 |
| 22203747 | YGGLHFDSDQVEVFSPPGSDR    | procollagen, type VI, alpha 2 [Mus musculus]                                                         | 2194.0383 | 23.29  | 0           |
| 63746482 | YGGQPVNPFPSK             | PREDICTED: filamin, alpha [Mus musculus]                                                             | 1290.6501 | 55.93  | 0.256371091 |
| 6753240  | YGIVDYMIEQSGPPSK         | calcium binding protein, intestinal [Mus musculus]                                                   | 1783.8557 | 64.7   | 0           |
| 6753036  | YGLAAAVFTK               | aldehyde dehydrogenase 2, mitochondrial [Mus musculus]                                               | 1040.5708 | 53.21  | 0.464971049 |
| 21312260 | YGLAAAVFTR               | aldehyde dehydrogenase 1 family, member B1 [Mus musculus]                                            | 1068.584  | 50.55  | 0.265633442 |
| 13195624 | YGLLAAILGDK              | NADH dehydrogenase (ubiquinone) 1 alpha subcomplex 10 [Mus musculus]                                 | 1133.6587 | 47.99  | 0.242107075 |
| 6753820  | YGPVIVDYYVPLDFYTR        | FUS interacting protein (serine-arginine rich) 1 [Mus musculus]                                      | 1916.9777 | 32.28  | 0.390910013 |
| 37674216 | YGPLSGVNVVYDQR           | RIKEN cDNA G430041M01 [Mus musculus]                                                                 | 1566.7699 | 25.09  | 0           |
| 11612505 | YGSQSGQQSVTVGEESDDANSYWR | stromal cell-derived factor 2-like 1 [Mus musculus]                                                  | 2579.0996 | 85.49  | 0.341748444 |
| 20149728 | YGTNIIQGLSSIR            | ATPase, H+/K+ transporting, nongastric, alpha polypeptide [Mus musculus]                             | 1421.7706 | 35.68  | 0.183600692 |
| 6755817  | YGVNPGPIVGTTR            | thymopoietin [Mus musculus]                                                                          | 1330.7111 | 47.64  | 0.420084886 |
| 6680606  | YGVQLSQIQSVISGFQAQLSDVR  | keratin complex 1, acidic, gene 19 [Mus musculus]                                                    | 2524.3037 | 112.52 | 0.366718098 |
| 6679687  | YGVSGYPTLK               | glucose regulated protein [Mus musculus]                                                             | 1084.5624 | 58.59  | 0.326270363 |
| 40556608 | YHTSQSGDEMSTLSEYVSR      | heat shock protein 1, beta [Mus musculus]                                                            | 2176.9451 | 111.31 | 0.453227354 |
| 34996495 | YIANTVELR                | ribophorin II [Mus musculus]                                                                         | 1078.5896 | 57.66  | 0.399405622 |
| 19882199 | YIASVQGSAPSPR            | RAN binding protein 2 [Mus musculus]                                                                 | 1332.6954 | 36.93  | 0.626817237 |
| 6754084  | YIATPIFSK                | glutathione S-transferase, mu 1 [Mus musculus]                                                       | 1039.573  | 34.78  | 0           |
| 51491845 | YIEIYYQK                 | clathrin, heavy polypeptide (Hc) [Mus musculus]                                                      | 1055.5701 | 27.88  | 0           |
| 6753514  | YILSDSSPVPPEFLAYLTSENR   | carnitine palmitoyltransferase 2 [Mus musculus]                                                      | 2498.2275 | 38.52  | 0.221967391 |
| 63746482 | YIPVQGGPVGNNVYGGDHIPK    | PREDICTED: filamin, alpha [Mus musculus]                                                             | 2338.2224 | 80.08  | 0           |
| 38080000 | YIQELWR                  | PREDICTED: similar to ribosomal protein L15 [Mus musculus]                                           | 1007.5347 | 37.2   | 0           |
| 51770896 | YITPDQLADLYK             | PREDICTED: similar to Alpha enolase (2-phospho-D-glycerate hydro-lyase) (Non-neural enolase) (NNE)   | 1439.7374 | 67.95  | 0.489684315 |
| 6753072  | YITQSGDYQLR              | adaptor protein complex AP-1, mu 2 subunit [Mus musculus]                                            | 1343.6614 | 33.2   | 0           |
| 24418933 | YIVFVEGYPLTISGK          | hypothetical protein LOC264895 [Mus musculus]                                                        | 1685.8937 | 35.53  | 127.4431519 |
| 16716381 | YLDLILNDFVR              | lysyl-tRNA synthetase [Mus musculus]                                                                 | 1380.7563 | 49.61  | 0.377555234 |
| 18875380 | YLECSALTQR               | RAS-related C3 botulinum substrate 3 [Mus musculus]                                                  | 1183.5774 | 52.08  | 0.374491631 |
| 7110683  | YLEDQVNTDLPEYIER         | phosphoenolpyruvate carboxykinase 1, cytosolic [Mus musculus]                                        | 1996.9459 | 41.73  | 0           |
| 63530525 | YLELLGYR                 | PREDICTED: SEC31-like 1 [Mus musculus]                                                               | 1026.5613 | 43.53  | 0.926868622 |
| 45592930 | YLFLGDYVDR               | protein phosphatase 3, catalytic subunit, beta isoform [Mus musculus]                                | 1260.6393 | 26.71  | 0.130748336 |
| 20330802 | YLGAEYMQSVGNMR           | transferrin [Mus musculus]                                                                           | 1618.7416 | 69.33  | 0           |
| 37537522 | YLGSSSCIAGVLPVQGEPPGR    | epiplakin 1 [Mus musculus]                                                                           | 2059.0647 | 75.34  | 0.283601383 |
| 6754782  | YLGLENVR                 | myosin IB [Mus musculus]                                                                             | 1076.6144 | 58.36  | 0.326517169 |
| 51766008 | YLGLENVR                 | PREDICTED: myosin IA [Mus musculus]                                                                  | 1076.6144 | 58.36  | 0.326517169 |
| 34328286 | YLGPAVLMQAYR             | succinate dehydrogenase 1p subunit [Mus musculus]                                                    | 1381.7286 | 24.77  | 0.650298514 |
| 6671668  | YLGQDYETLR               | calpain 1 [Mus musculus]                                                                             | 1257.6133 | 27.93  | 0.481594934 |
| 31981592 | YLLEQDFPQMR              | EH domain containing protein MPAST2 [Mus musculus]                                                   | 1368.6643 | 39.09  | 0.439223827 |
| 29244048 | YLLQRHEKHSR              | zinc finger protein 281 [Mus musculus]                                                               | 1579.8593 | 22.54  | 0           |
| 31560645 | YLLSQSSAPLTAEEELR        | twinfilin [Mus musculus]                                                                             | 2075.0652 | 92.29  | 0.58115801  |
| 6753254  | YLNQDYETLR               | calpain 2 [Mus musculus]                                                                             | 1314.635  | 63.1   | 0.322619215 |
| 6680982  | YLPDTLLLEEGLLR           | catechol-O-methyltransferase [Mus musculus]                                                          | 1747.9315 | 28.75  | 0           |
| 7305295  | YLPIYSEK                 | myosin, heavy polypeptide 11, smooth muscle [Mus musculus]                                           | 1012.5283 | 37.6   | 0           |
| 41322904 | YLDLLAVEENQR             | plectin 1 isoform 1 [Mus musculus]                                                                   | 1776.8937 | 49.43  | 0.586079702 |
| 33859488 | YLTVAAIIFR               | tubulin, beta 2 [Mus musculus]                                                                       | 1053.6121 | 46.6   | 0.240155759 |
| 21746161 | YLTVAAIIFR               | tubulin, beta [Mus musculus]                                                                         | 1053.6121 | 46.6   | 0.240155759 |
| 22165384 | YLTVAAVFR                | tubulin, beta, 2 [Mus musculus]                                                                      | 1039.5952 | 49.93  | 0.563390236 |
| 31981939 | YLTVAAVFR                | tubulin, beta 4 [Mus musculus]                                                                       | 1039.5952 | 49.93  | 0.563390236 |
| 7106439  | YLTVAAVFR                | tubulin, beta 5 [Mus musculus]                                                                       | 1039.5952 | 49.93  | 0.563390236 |
| 41322904 | YLYGTGAVAGVYLPQSR        | plectin 1 isoform 1 [Mus musculus]                                                                   | 1743.9133 | 35.36  | 0           |
| 33859506 | YMCENQATISSK             | albumin 1 [Mus musculus]                                                                             | 1374.6041 | 105.87 | 0           |
| 33859506 | YMCENQATISSK             | albumin 1 [Mus musculus]                                                                             | 1390.5948 | 78.38  | 0           |
| 63660302 | YMIGVTYGGDNIPLSPYR       | PREDICTED: filamin B, beta [Mus musculus]                                                            | 2015.9984 | 54.25  | 0.523265191 |
| 6679078  | YMNSGPVVAMVWEGLVNVK      | nucleoside-diphosphate kinase 2 [Mus musculus]                                                       | 2093.0471 | 43.7   | 0.358428805 |
| 6679078  | YMNSGPVVAMVWEGLVNVK      | nucleoside-diphosphate kinase 2 [Mus musculus]                                                       | 2109.0393 | 22.3   | 0           |
| 7305085  | YMYDNWESQDVSFTLLVER      | glutamine fructose-6-phosphate transaminase 1 [Mus musculus]                                         | 2383.0581 | 86.36  | 0.303996872 |

|          |                             |                  |                                                                                 |           |        |             |
|----------|-----------------------------|------------------|---------------------------------------------------------------------------------|-----------|--------|-------------|
| 6678573  | YNDEPVQIR                   |                  | villin 1 [Mus musculus]                                                         | 1133.5576 | 34     | 0.758947171 |
| 6755863  | YNDTFWK                     |                  | tumor rejection antigen gp96 [Mus musculus]                                     | 973.4421  | 35.63  | 0.427178208 |
| 7949051  | YNILGNTIMDK                 |                  | heterogenous nuclear ribonucleoprotein U [Mus musculus]                         | 1382.6838 | 54.86  | 0           |
| 13654268 | YNLDFWR                     |                  | tissue specific transplantation antigen P35B [Mus musculus]                     | 1013.4899 | 37.52  | 0.28076963  |
| 6753138  | YNPNVLPVQCTGK               |                  | Na+/K+ -ATPase beta 1 subunit [Mus musculus]                                    | 1432.7218 | 51.53  | 0.326953519 |
| 19526930 | YNPPVDATPDTR                |                  | WD repeat domain 23 [Mus musculus]                                              | 1345.6469 | 33.92  | 0           |
| 31981522 | YNQMDSTEDAQEFGWK            |                  | transmembrane 9 superfamily member 2 [Mus musculus]                             | 2077.8499 | 91.17  | 0.422079743 |
| 51771420 | YNVLGAETVLTQMR              |                  | PREDICTED: hypothetical protein LOC68693 [Mus musculus]                         | 1594.826  | 64.46  | 0           |
| 9790237  | YPDANPNPNEQ                 |                  | SMC1 structural maintenance of chromosomes 1-like 1 [Mus musculus]              | 1258.5358 | 25.82  | 0           |
| 42741690 | YPEAPPSVR                   |                  | ubiquitin-conjugating enzyme E2 variant 1 [Mus musculus]                        | 1015.5251 | 42.4   | 0.332493892 |
| 31543918 | YPEAPPSVR                   |                  | ubiquitin-conjugating enzyme E2 variant 2 [Mus musculus]                        | 1015.5251 | 42.4   | 0.332493892 |
| 28173568 | YPENFFLLR                   |                  | protein phosphatase 1, catalytic subunit, beta [Mus musculus]                   | 1198.6284 | 35.33  | 0.32064097  |
| 6671507  | YPIEHGIITNWDMEK             |                  | actin, alpha 2, smooth muscle, aorta [Mus musculus]                             | 1960.9116 | 48.43  | 0           |
| 7709980  | YPLLGGIR                    |                  | S-adenosylhomocysteine hydrolase [Mus musculus]                                 | 1046.5964 | 45.6   | 0.281131355 |
| 24429590 | YSPFFVFGKE                  |                  | DEAH (Asp-Glu-Ala-His) box polypeptide 9 [Mus musculus]                         | 1317.6548 | 63.37  | 0.633958803 |
| 8567336  | YPTDGSEIVLLTDGEDNTISSCFDLVK |                  | chloride channel calcium activated 3 [Mus musculus]                             | 2931.4041 | 99.91  | 0           |
| 7549795  | YQEEGVPVQPR                 |                  | tight junction protein 2 [Mus musculus]                                         | 1299.6348 | 30.49  | 0.444252844 |
| 31560656 | YQGVNLYVK                   |                  | poly A binding protein, cytoplasmic 1 [Mus musculus]                            | 1083.5789 | 43.62  | 0           |
| 63492638 | YQGVNLYVK                   |                  | PREDICTED: similar to MGC89376 protein [Mus musculus]                           | 1083.5789 | 43.62  | 0           |
| 6755965  | YQLDPTASISAK                |                  | voltage-dependent anion channel 2 [Mus musculus]                                | 1293.6622 | 29.65  | 0           |
| 6755963  | YQVDPDACFSAK                |                  | voltage-dependent anion channel 1 [Mus musculus]                                | 1343.5957 | 59.1   | 0.362943016 |
| 33859490 | YSDIEPSTEGEVIFR             |                  | laminin B1 subunit 1 [Mus musculus]                                             | 1741.8392 | 32.35  | 0.14442126  |
| 31560697 | YSDMIVAIAQAEK               |                  | H1 histone family, member 0 [Mus musculus]                                      | 1438.722  | 57.71  | 0           |
| 31560697 | YSDMIVAIAQAEK               | Oxidation (M)    | H1 histone family, member 0 [Mus musculus]                                      | 1454.7032 | 45.14  | 0           |
| 31982223 | YSEIEPSTEGEVIYR             |                  | laminin, beta 2 [Mus musculus]                                                  | 1771.8424 | 53.23  | 0           |
| 41322904 | YSELTTLTSQYIK               |                  | plectin 1 isoform 1 [Mus musculus]                                              | 1546.7905 | 34.58  | 5.962648677 |
| 23956406 | YSGGLPLPPSYVPMSELSDR        |                  | UDP glucuronosyltransferase 2 family, polypeptide B34 [Mus musculus]            | 2363.1948 | 27.39  | 0.206529451 |
| 8567336  | YSIQASSQTLTLTVTSR           |                  | chloride channel calcium activated 3 [Mus musculus]                             | 1855.9734 | 46.5   | 0.136082608 |
| 6679291  | YSLEPVAELK                  |                  | phosphoglycerate kinase 1 [Mus musculus]                                        | 1219.6458 | 59.01  | 0           |
| 6679237  | YSLEYMGLAEELVR              |                  | pyruvate carboxylase [Mus musculus]                                             | 1835.9016 | 48.76  | 0           |
| 6679237  | YSLEYMGLAEELVR              | Oxidation (M)    | pyruvate carboxylase [Mus musculus]                                             | 1851.8834 | 22.77  | 0           |
| 34328130 | YSDLYELQASR                 |                  | host cell factor C1 [Mus musculus]                                              | 1458.6863 | 23.92  | 0.630193589 |
| 34328130 | YSDLYELQASR                 | Deamidation (NQ) | host cell factor C1 [Mus musculus]                                              | 1459.6915 | 34.58  | 1.659353021 |
| 63746482 | YSPSEAGLHEMDIR              |                  | PREDICTED: filamin, alpha [Mus musculus]                                        | 1604.7434 | 49.61  | 0           |
| 6755863  | YSQFINFIYVWSSK              |                  | tumor rejection antigen gp96 [Mus musculus]                                     | 1878.942  | 93.13  | 0.407776058 |
| 6677871  | YSTNTQIQVLEPEGGETPIFK       |                  | scinderin [Mus musculus]                                                        | 2222.1328 | 80.96  | 0.307644078 |
| 42734399 | YSWQDEIAQGTWR               |                  | desmuslin isoform H [Mus musculus]                                              | 1639.7542 | 51.4   | 0           |
| 46559834 | YSWQDEIAQGTWR               |                  | desmuslin isoform M [Mus musculus]                                              | 1639.7542 | 51.4   | 0           |
| 6681179  | YTAAPYR                     |                  | 7-dehydrocholesterol reductase [Mus musculus]                                   | 940.4871  | 32.99  | 0.567126788 |
| 14161694 | YTFDEFSQR                   |                  | myosin VIIb [Mus musculus]                                                      | 1192.5339 | 42.05  | 0.531467897 |
| 6754084  | YTMGDAPDFDR                 |                  | glutathione S-transferase, mu 1 [Mus musculus]                                  | 1287.5327 | 38.62  | 0           |
| 6754084  | YTMGDAPDFDR                 | Oxidation (M)    | glutathione S-transferase, mu 1 [Mus musculus]                                  | 1303.5215 | 27.56  | 0.214273158 |
| 6671539  | YTPSGQSGAAASELSFISNHAY      |                  | aldolase 1, A isoform [Mus musculus]                                            | 2258.0354 | 106.73 | 0.388870845 |
| 6754016  | YTPPEDATPEPGEDPR            |                  | guanine nucleotide binding protein alpha stimulating isoform b [Mus musculus]   | 1774.7828 | 54.26  | 0.277528656 |
| 27754065 | YVANLFPYK                   |                  | pyrophosphatase [Mus musculus]                                                  | 1114.5874 | 25.31  | 0           |
| 27370154 | YVDLGGSYVGPTQNR             |                  | amine oxidase (flavin-containing) [Mus musculus]                                | 1625.7968 | 68.53  | 0           |
| 6680854  | YVDSEGHLYTVPIR              |                  | caveolin, caveolae protein 1 [Mus musculus]                                     | 1648.8351 | 64.97  | 0.105303763 |
| 13386062 | YVEEQPGNLQR                 |                  | hypothetical protein LOC68117 [Mus musculus]                                    | 1332.6559 | 42.2   | 0.293157009 |
| 33859482 | YVEPIEDVPCGNIVGLVGVDQFLVK   |                  | eukaryotic translation elongation factor 2 [Mus musculus]                       | 2702.4253 | 81.16  | 0.548238296 |
| 28076981 | YVEQLLTLFNR                 |                  | culin 5 [Mus musculus]                                                          | 1395.7609 | 40.23  | 0           |
| 31541863 | YVNWQQTIAAN                 |                  | RIKEN cDNA 2210010C04 [Mus musculus]                                            | 1420.7173 | 89.43  | 0           |
| 40254244 | YVQELPLETDGALR              |                  | loss of heterozygosity, 11, chromosomal region 2, gene A homolog [Mus musculus] | 1603.8347 | 42.58  | 0           |
| 13994221 | YVQLPADEVDTQLLQDAAR         |                  | snRNP core protein SMX5 [Mus musculus]                                          | 2145.0811 | 58.93  | 0.612916867 |
| 21312570 | YVSSLTEISR                  |                  | lectin, mannose-binding, 1 [Mus musculus]                                       | 1283.6384 | 32.14  | 0.31071533  |
| 10092608 | YVTLIYNENYNGK               |                  | glutathione S-transferase, pi 1 [Mus musculus]                                  | 1577.7791 | 68.87  | 0.643070479 |
| 64427157 | YVVSDTVGAHTVR               |                  | PREDICTED: synaptodin 2 [Mus musculus]                                          | 1589.7854 | 67.34  | 0           |
| 21704206 | YWANFAR                     |                  | carboxylesterase 2 [Mus musculus]                                               | 927.4471  | 22.96  | 0.269131663 |
| 27370126 | YWANFAR                     |                  | carboxylesterase 5 [Mus musculus]                                               | 927.4471  | 22.96  | 0.269131663 |
| 19527178 | YWANFAR                     |                  | carboxylesterase 6 [Mus musculus]                                               | 927.4471  | 22.96  | 0.269131663 |
| 6681143  | YWEIFPNTFR                  |                  | decorin [Mus musculus]                                                          | 1372.6715 | 28.35  | 0.183874762 |

|          |                  |                                                                                |           |       |             |
|----------|------------------|--------------------------------------------------------------------------------|-----------|-------|-------------|
| 27754118 | YWEIQPATFR       | asporin [Mus musculus]                                                         | 1310.6573 | 34.04 | 0.160772679 |
| 6678499  | YWQQVIDMNDYQR    | UDP-glucose dehydrogenase [Mus musculus]                                       | 1758.8151 | 35.11 | 0.469037055 |
| 6753036  | YYAGWADK         | aldehyde dehydrogenase 2, mitochondrial [Mus musculus]                         | 973.4493  | 48.19 | 0.268256059 |
| 31982290 | YYEPYYAAGPSYGGR  | LIM domain containing preferred translocation partner in lipoma [Mus musculus] | 1713.7583 | 62.61 | 0.19105974  |
| 23943876 | YYIVGLQVR        | zymogen granule membrane protein 16 [Mus musculus]                             | 1110.6322 | 44.43 | 0.272189193 |
| 6755354  | YYPTEDVPR        | ribosomal protein L6 [Mus musculus]                                            | 1139.5399 | 47.65 | 0.402672182 |
| 22122523 | YYRPTEVDFLQGDCK  | GDP-mannose 4, 6-dehydratase [Mus musculus]                                    | 1920.887  | 23.63 | 0.358301898 |
| 31981327 | YYTPTISR         | proteasome (prosome, macropain) subunit, beta type 2 [Mus musculus]            | 1000.5108 | 22.94 | 0.369392434 |
| 63556656 | YYVLGATFYPGPECER | PREDICTED: RIKEN cDNA A430096B05 gene [Mus musculus]                           | 1864.8815 | 40.8  | 0.135432641 |
| 51873060 | YYVTIIDAPGHR     | eukaryotic translation elongation factor 1 alpha 1 [Mus musculus]              | 1404.7281 | 57.02 | 0.598357872 |
