# Supplementary material
Source: PubMed Central journal article supplement (PMC2761368)
Supplement: 0909282106_ST3_PDF.pdf [file 0909282106_ST3_PDF.pdf]

Table S3. Summary of proteins identified

| Annotation                                                                                       | # pairs | Ave        | Rel Std Error |
|--------------------------------------------------------------------------------------------------|---------|------------|---------------|
| aldolase 1, A isoform [Mus musculus]                                                             | 4       | 0.0144934  | 7.19503428    |
| peroxiredoxin 6 [Mus musculus]                                                                   | 4       | -0.5683804 | 1.18624985    |
| B-cell receptor-associated protein 37 [Mus musculus]                                             | 4       | -0.1988589 | 0.43039077    |
| calnexin [Mus musculus]                                                                          | 4       | 0.3664145  | 0.52158557    |
| CAP, adenylate cyclase-associated protein 1 [Mus musculus]                                       | 4       | 0.26492003 | 0.26726892    |
| carbonyl reductase 1 [Mus musculus]                                                              | 4       | 0.30012604 | 1.99956134    |
| ribosomal protein L18 [Mus musculus]                                                             | 4       | 0.2844883  | 0.59611805    |
| scinderin [Mus musculus]                                                                         | 4       | 0.38784609 | 1.26086822    |
| solute carrier family 16, member 1 [Mus musculus]                                                | 4       | -0.3214434 | 0.34681044    |
| signal sequence receptor, delta [Mus musculus]                                                   | 4       | 0.29076485 | 0.55278611    |
| transglutaminase 2, C polypeptide [Mus musculus]                                                 | 4       | 0.01030873 | 21.9866271    |
| transketolase [Mus musculus]                                                                     | 4       | 0.12487549 | 0.39143596    |
| thiosulfate sulfurtransferase, mitochondrial [Mus musculus]                                      | 4       | -0.1962572 | 0.60406191    |
| tubulin, alpha 4 [Mus musculus]                                                                  | 4       | 0.01239543 | 14.974703     |
| ubiquitin-activating enzyme E1, Chr X [Mus musculus]                                             | 4       | 0.07195928 | 0.88967123    |
| UDP-glucose dehydrogenase [Mus musculus]                                                         | 4       | -0.9120259 | 0.30019838    |
| villin 2 [Mus musculus]                                                                          | 4       | 0.01197687 | 8.37393671    |
| villin 1 [Mus musculus]                                                                          | 4       | -0.01122   | 14.9860578    |
| lymphocyte antigen 74 [Mus musculus]                                                             | 4       | 0.06867923 | 2.75510731    |
| peptidylprolyl isomerase A [Mus musculus]                                                        | 4       | 0.23946575 | 0.16603947    |
| protein kinase C substrate 80K-H [Mus musculus]                                                  | 4       | 0.10204211 | 1.71673046    |
| polymerase I and transcript release factor [Mus musculus]                                        | 4       | -0.6908885 | 0.60549569    |
| glucose regulated protein [Mus musculus]                                                         | 4       | 0.19763137 | 0.81331794    |
| fructose biphosphatase 2 [Mus musculus]                                                          | 4       | 0.10180935 | 0.73197926    |
| alpha glucosidase 2 alpha neutral subunit [Mus musculus]                                         | 4       | 0.22989476 | 0.57293556    |
| glutamate dehydrogenase 1 [Mus musculus]                                                         | 4       | -0.1326699 | 1.54178472    |
| guanine nucleotide binding protein (G protein), beta polypeptide 2 like 1 [Mus musculus]         | 4       | 0.25910887 | 0.37453941    |
| glucose phosphate isomerase 1 [Mus musculus]                                                     | 4       | -0.1978038 | 0.850255      |
| kinesin family member 5B [Mus musculus]                                                          | 4       | -0.0596039 | 6.75360705    |
| keratin complex 1, acidic, gene 19 [Mus musculus]                                                | 4       | -0.0573279 | 3.02277695    |
| ATP synthase, H+ transporting, mitochondrial F1 complex, alpha subunit, isoform 1 [Mus musculus] | 4       | -0.1611587 | 0.40032932    |
| calreticulin [Mus musculus]                                                                      | 4       | 0.22725457 | 0.72798561    |
| caveolin, caveolae protein 1 [Mus musculus]                                                      | 4       | -0.7940445 | 0.69677189    |
| cysteine and glycine-rich protein 1 [Mus musculus]                                               | 4       | -0.6834707 | 0.8991888     |
| dihydropyrimidinase-like 3 [Mus musculus]                                                        | 4       | 0.10094907 | 11.3436809    |
| solute carrier family 26 (sulfate transporter), member 2 [Mus musculus]                          | 4       | -0.5881574 | 0.53563842    |
| alcohol dehydrogenase 1 (class I) [Mus musculus]                                                 | 4       | 0.16488464 | 4.41710734    |
| anterior gradient 2 [Mus musculus]                                                               | 4       | -0.2610793 | 1.72988856    |
| aldehyde dehydrogenase 2, mitochondrial [Mus musculus]                                           | 4       | 0.03210806 | 11.7317594    |
| annexin A5 [Mus musculus]                                                                        | 4       | -0.0941825 | 2.81953414    |
| Na+/K+ -ATPase beta 1 subunit [Mus musculus]                                                     | 4       | -0.1398672 | 1.06260078    |
| calcium binding protein, intestinal [Mus musculus]                                               | 4       | 0.27963325 | 0.42421964    |
| calpain 2 [Mus musculus]                                                                         | 4       | -0.1736981 | 0.97929847    |
| capping protein (actin filament) muscle Z-line, beta [Mus musculus]                              | 4       | 0.32928245 | 0.40991477    |
| carbonic anhydrase 1 [Mus musculus]                                                              | 4       | -1.1455491 | 0.86189323    |
| catenin alpha 1 [Mus musculus]                                                                   | 4       | 0.17099692 | 1.34673802    |
| serine (or cysteine) proteinase inhibitor, clade H, member 1 [Mus musculus]                      | 4       | 0.0328413  | 2.27738439    |
| chaperonin subunit 3 (gamma) [Mus musculus]                                                      | 4       | 0.20028567 | 0.24336179    |
| cell division cycle 42 homolog [Mus musculus]                                                    | 4       | 0.36154554 | 0.48894498    |
| creatine kinase, mitochondrial 1, ubiquitous [Mus musculus]                                      | 4       | -0.0867194 | 7.73325478    |
| procollagen, type VI, alpha 1 [Mus musculus]                                                     | 4       | -0.3986111 | 2.06541181    |
| coronin, actin binding protein 1A [Mus musculus]                                                 | 4       | 2.00597124 | 0.10099695    |
| cytochrome c oxidase subunit IV isoform 1 [Mus musculus]                                         | 4       | 0.01621978 | 9.48665617    |
| dynein, cytoplasmic, intermediate chain 2 [Mus musculus]                                         | 4       | 0.0623437  | 0.84860194    |
| four and a half LIM domains 1 [Mus musculus]                                                     | 4       | -0.656957  | 0.8433015     |
| glutathione S-transferase omega 1 [Mus musculus]                                                 | 4       | -0.072049  | 2.92763822    |
| hexokinase 1 [Mus musculus]                                                                      | 4       | -0.1629006 | 1.16465342    |
| heat shock protein 9A [Mus musculus]                                                             | 4       | 0.06011018 | 4.16018046    |

|                                                                                                      |   |            |            |
|------------------------------------------------------------------------------------------------------|---|------------|------------|
| keratin complex 1, acidic, gene 18 [Mus musculus]                                                    | 4 | 0.10339825 | 1.43132481 |
| LIM and SH3 protein 1 [Mus musculus]                                                                 | 4 | 0.24104192 | 1.11459148 |
| lactate dehydrogenase 1, A chain [Mus musculus]                                                      | 4 | -0.1402406 | 1.1024767  |
| lamin B1 [Mus musculus]                                                                              | 4 | 0.38327529 | 0.53785826 |
| moesin [Mus musculus]                                                                                | 4 | 0.43038691 | 0.59074567 |
| nidogen 1 [Mus musculus]                                                                             | 4 | -0.4422854 | 0.90722432 |
| programmed cell death 8 [Mus musculus]                                                               | 4 | -0.4947254 | 0.34875448 |
| profilin 1 [Mus musculus]                                                                            | 4 | 0.17927834 | 0.21148416 |
| peptidylprolyl isomerase B [Mus musculus]                                                            | 4 | 0.16455136 | 1.24830863 |
| proteasome (prosome, macropain) subunit, alpha type 6 [Mus musculus]                                 | 4 | 0.11100061 | 1.31325836 |
| purine rich element binding protein B [Mus musculus]                                                 | 4 | -0.0833777 | 2.125685   |
| ribosomal protein L6 [Mus musculus]                                                                  | 4 | 0.12145198 | 1.45111299 |
| ribosomal protein S3 [Mus musculus]                                                                  | 4 | 0.28214849 | 0.6878566  |
| splicing factor, arginine/serine-rich 2 [Mus musculus]                                               | 4 | 0.41050531 | 0.26735578 |
| solute carrier family 9 (sodium/hydrogen exchanger), isoform 3 regulator 1 [Mus musculus]            | 4 | -0.2949358 | 0.54202492 |
| sepiapterin reductase [Mus musculus]                                                                 | 4 | 0.05265214 | 2.75557981 |
| surfeit gene 4 [Mus musculus]                                                                        | 4 | 0.04345708 | 1.62361241 |
| transgelin [Mus musculus]                                                                            | 4 | -0.880802  | 0.73481188 |
| talin 1 [Mus musculus]                                                                               | 4 | -0.3583341 | 0.93800768 |
| thymopoietin [Mus musculus]                                                                          | 4 | 0.26434418 | 0.40408578 |
| tumor rejection antigen gp96 [Mus musculus]                                                          | 4 | 0.34099229 | 0.38164169 |
| voltage-dependent anion channel 1 [Mus musculus]                                                     | 4 | -0.2322491 | 0.64688259 |
| voltage-dependent anion channel 2 [Mus musculus]                                                     | 4 | 0.15760731 | 0.76123287 |
| voltage-dependent anion channel 3 [Mus musculus]                                                     | 4 | -0.2070709 | 0.52220874 |
| nuclease sensitive element binding protein 1 [Mus musculus]                                          | 4 | 0.1571089  | 0.28744762 |
| tyrosine 3-monooxygenase/tryptophan 5-monooxygenase activation protein, zeta polypeptide [Mus muscu] | 4 | 0.1144205  | 0.59477345 |
| ATPase, Ca++ transporting, cardiac muscle, slow twitch 2 [Mus musculus]                              | 4 | -0.0547419 | 2.6237027  |
| tenascin C [Mus musculus]                                                                            | 4 | -0.965599  | 0.44410466 |
| tubulin, beta 5 [Mus musculus]                                                                       | 4 | 0.250797   | 1.22119173 |
| proteasome (prosome, macropain) subunit, beta type 1 [Mus musculus]                                  | 4 | 0.06088269 | 1.03884295 |
| annexin A3 [Mus musculus]                                                                            | 4 | 0.02411711 | 20.5180712 |
| annexin A4 [Mus musculus]                                                                            | 4 | -0.0047456 | 33.296913  |
| drebrin-like [Mus musculus]                                                                          | 4 | 0.3815259  | 0.61641571 |
| glutamine fructose-6-phosphate transaminase 1 [Mus musculus]                                         | 4 | -0.0417415 | 2.58184251 |
| heat shock protein 1 [Mus musculus]                                                                  | 4 | -0.7350048 | 0.86131983 |
| myosin, heavy polypeptide 11, smooth muscle [Mus musculus]                                           | 4 | -1.1624178 | 0.61286146 |
| purine-nucleoside phosphorylase [Mus musculus]                                                       | 4 | 1.00667018 | 0.6721433  |
| smoothelin [Mus musculus]                                                                            | 4 | -0.2535932 | 1.95589928 |
| osteoblast specific factor 2 (fasciclin I-like) [Mus musculus]                                       | 4 | -0.3222916 | 0.3641315  |
| RAB10, member RAS oncogene family [Mus musculus]                                                     | 4 | -0.1264416 | 1.12119515 |
| PDZ and LIM domain 3 [Mus musculus]                                                                  | 4 | -0.6572472 | 0.93088086 |
| heterogenous nuclear ribonucleoprotein U [Mus musculus]                                              | 4 | 0.24975532 | 0.37883271 |
| heterogeneous nuclear ribonucleoprotein A2/B1 isoform 1 [Mus musculus]                               | 4 | 0.03245655 | 4.60188532 |
| claudin 7 [Mus musculus]                                                                             | 4 | 0.45593708 | 0.78064096 |
| carboxyl terminal LIM domain protein 1 [Mus musculus]                                                | 4 | 0.05581566 | 2.459491   |
| ST6 (alpha-N-acetyl-neuraminyl-2,3-beta-galactosyl-1,3)-N-acetylgalactosaminide alpha-2,6-sialyltra  | 4 | 0.44179618 | 1.0027841  |
| chloride channel calcium activated 3 [Mus musculus]                                                  | 4 | 0.71194451 | 1.50716883 |
| staphylococcal nuclease domain containing 1 [Mus musculus]                                           | 4 | 0.36527108 | 0.22932879 |
| cadherin 17 [Mus musculus]                                                                           | 4 | 0.14523467 | 1.89184611 |
| ubiquitin-like 1 (sentrin) activating enzyme subunit 1 [Mus musculus]                                | 4 | 0.35828687 | 0.58341451 |
| START domain containing 10 [Mus musculus]                                                            | 4 | 0.10222509 | 2.32123029 |
| ATP synthase, H+ transporting, mitochondrial F0 complex, subunit f, isoform 2 [Mus musculus]         | 4 | -0.2662314 | 0.41643726 |
| creatine kinase, brain [Mus musculus]                                                                | 4 | -1.0750178 | 0.58227447 |
| actinin alpha 4 [Mus musculus]                                                                       | 4 | -0.0015838 | 60.4245801 |
| heterogeneous nuclear ribonucleoprotein K [Mus musculus]                                             | 4 | 0.08481691 | 1.23458155 |
| dynein, cytoplasmic, heavy chain 1 [Mus musculus]                                                    | 4 | -0.0354284 | 3.28990485 |
| serine (or cysteine) proteinase inhibitor, clade B, member 1a [Mus musculus]                         | 4 | 0.11509997 | 0.95200697 |
| cytochrome c-1 [Mus musculus]                                                                        | 4 | -0.2306907 | 0.35014557 |
| ubiquinol-cytochrome c reductase, Rieske iron-sulfur polypeptide 1 [Mus musculus]                    | 4 | -0.1764354 | 0.56290731 |
| ribosomal protein L14 [Mus musculus]                                                                 | 4 | 0.31368362 | 0.28687209 |
| small nuclear ribonucleoprotein D3 [Mus musculus]                                                    | 4 | 0.29830649 | 0.5576301  |
| 2,4-dienoyl CoA reductase 1, mitochondrial [Mus musculus]                                            | 4 | -0.0689834 | 4.0827006  |

|                                                                                                   |   |            |            |
|---------------------------------------------------------------------------------------------------|---|------------|------------|
| citrate synthase [Mus musculus]                                                                   | 4 | -0.1580767 | 0.57408261 |
| actin related protein 2/3 complex, subunit 4 [Mus musculus]                                       | 4 | 0.18393428 | 0.13352139 |
| hypothetical protein LOC68117 [Mus musculus]                                                      | 4 | -0.2095578 | 0.47642376 |
| LPS-responsive beige-like anchor [Mus musculus]                                                   | 4 | -0.1408087 | 2.08080579 |
| keratin complex 2, basic, gene 8 [Mus musculus]                                                   | 4 | 0.01191207 | 19.092263  |
| eukaryotic translation initiation factor 2, subunit 2 (beta) [Mus musculus]                       | 4 | 0.17074982 | 0.82541772 |
| keratin complex 2, basic, gene 7 [Mus musculus]                                                   | 4 | -0.1242707 | 1.36210017 |
| coatomer protein complex, subunit beta 1 [Mus musculus]                                           | 4 | -0.0168655 | 5.76825683 |
| chloride intracellular channel 1 [Mus musculus]                                                   | 4 | 0.19414895 | 0.35959769 |
| N-acetylneuraminic acid synthase (sialic acid synthase) [Mus musculus]                            | 4 | -0.0899221 | 1.73383003 |
| aconitase 2, mitochondrial [Mus musculus]                                                         | 4 | -0.2841032 | 0.4383742  |
| major vault protein [Mus musculus]                                                                | 4 | -0.1077772 | 2.53499073 |
| pyruvate dehydrogenase (lipoamide) beta [Mus musculus]                                            | 4 | 0.59826447 | 0.86931729 |
| isocitrate dehydrogenase 3 (NAD+) alpha [Mus musculus]                                            | 4 | -0.1554431 | 0.67538472 |
| 3-oxoacid CoA transferase 1 [Mus musculus]                                                        | 4 | -0.3158505 | 1.34662019 |
| coactosin-like 1 [Mus musculus]                                                                   | 4 | 0.72055712 | 0.30973456 |
| crystallin, lamda 1 [Mus musculus]                                                                | 4 | -0.1797831 | 1.21080838 |
| solute carrier family 25 (mitochondrial carrier, phosphate carrier), member 3 [Mus musculus]      | 4 | -0.1646532 | 0.58442853 |
| hypothetical protein LOC98238 [Mus musculus]                                                      | 4 | 0.81060567 | 0.63366069 |
| lamin B receptor [Mus musculus]                                                                   | 4 | 0.42235352 | 0.24864443 |
| diaphorase 1 [Mus musculus]                                                                       | 4 | 0.02161595 | 5.80079236 |
| brain acyl-CoA hydrolase [Mus musculus]                                                           | 4 | -0.0636217 | 1.93950542 |
| myosin, heavy polypeptide 9, non-muscle [Mus musculus]                                            | 4 | 0.28549825 | 0.58577251 |
| biglycan [Mus musculus]                                                                           | 4 | -0.139383  | 1.54226311 |
| aldehyde dehydrogenase 1 family, member B1 [Mus musculus]                                         | 4 | -0.485159  | 0.41465317 |
| signal sequence receptor, gamma [Mus musculus]                                                    | 4 | 0.31615712 | 0.57293913 |
| dihydrolipoamide S-succinyltransferase (E2 component of 2-oxo-glutarate complex) [Mus musculus]   | 4 | -0.2132837 | 0.52859022 |
| UDP-glucose pyrophosphorylase 2 [Mus musculus]                                                    | 4 | -0.0053311 | 67.8644465 |
| acetyl-Coenzyme A acetyltransferase 1 precursor [Mus musculus]                                    | 4 | -0.0471318 | 1.98568315 |
| Na+/K+ -ATPase alpha 1 subunit [Mus musculus]                                                     | 4 | -0.2148024 | 0.47731184 |
| keratin 20 [Mus musculus]                                                                         | 4 | -0.3610973 | 0.71441296 |
| NADH dehydrogenase (ubiquinone) Fe-S protein 1 [Mus musculus]                                     | 4 | -0.421468  | 0.3432577  |
| TAR DNA binding protein isoform 1 [Mus musculus]                                                  | 4 | 0.25035989 | 0.75618428 |
| eukaryotic translation initiation factor 4B [Mus musculus]                                        | 4 | 0.13677105 | 0.50882053 |
| methionine adenosyltransferase II, alpha [Mus musculus]                                           | 4 | 0.35566836 | 2.06606026 |
| caldesmon 1 [Mus musculus]                                                                        | 4 | -0.8170208 | 0.64563341 |
| GDP-mannose 4, 6-dehydratase [Mus musculus]                                                       | 4 | -0.2032636 | 0.99240927 |
| acylpeptide hydrolase [Mus musculus]                                                              | 4 | 0.07946168 | 2.79716368 |
| actin-related protein 2 [Mus musculus]                                                            | 4 | 0.53459368 | 0.1577409  |
| selenium binding protein 1 [Mus musculus]                                                         | 4 | -0.7613561 | 0.43339095 |
| procollagen, type VI, alpha 2 [Mus musculus]                                                      | 4 | -0.4035336 | 2.52413998 |
| ubiquinol cytochrome c reductase core protein 2 [Mus musculus]                                    | 4 | -0.0599904 | 1.86716876 |
| protein kinase, cAMP dependent regulatory, type II alpha [Mus musculus]                           | 4 | -0.011737  | 13.7028244 |
| dynamitin 1-like [Mus musculus]                                                                   | 4 | -0.1383485 | 0.89460599 |
| NADH dehydrogenase (ubiquinone) Fe-S protein 2 [Mus musculus]                                     | 4 | -0.2082358 | 0.10100163 |
| PREDICTED: actin related protein 2/3 complex, subunit 2 [Mus musculus]                            | 4 | 0.2807897  | 2.09859967 |
| zymogen granule membrane protein 16 [Mus musculus]                                                | 4 | 0.45154911 | 0.99315601 |
| UDP glucuronosyltransferase 2 family, polypeptide B34 [Mus musculus]                              | 4 | -0.4626418 | 0.32486122 |
| brain glycogen phosphorylase [Mus musculus]                                                       | 4 | -0.2527252 | 0.55995006 |
| DEAH (Asp-Glu-Ala-His) box polypeptide 9 [Mus musculus]                                           | 4 | 0.33529594 | 0.38071016 |
| PREDICTED: laminin, alpha 5 [Mus musculus]                                                        | 4 | 0.32961816 | 1.3039038  |
| 5-aminoimidazole-4-carboxamide ribonucleotide formyltransferase/IMP cyclohydrolase [Mus musculus] | 4 | 0.33049845 | 0.08001873 |
| Tu translation elongation factor, mitochondrial [Mus musculus]                                    | 4 | 0.02900386 | 4.99730317 |
| pyrophosphatase [Mus musculus]                                                                    | 4 | 0.27658259 | 1.30671903 |
| monoamine oxidase A [Mus musculus]                                                                | 4 | -0.5663274 | 0.39997963 |
| gelsolin [Mus musculus]                                                                           | 4 | 0.00487162 | 15.7620986 |
| acetyl-Coenzyme A acyltransferase 2 (mitochondrial 3-oxoacyl-Coenzyme A thiolase) [Mus musculus]  | 4 | -0.5532739 | 0.31194093 |
| ATP citrate lyase [Mus musculus]                                                                  | 4 | -0.0211827 | 19.3174033 |
| nonmuscle myosin heavy chain [Mus musculus]                                                       | 4 | -0.0532023 | 3.41216887 |
| coatomer protein complex, subunit beta 2 (beta prime) [Mus musculus]                              | 4 | 0.0659934  | 1.8561594  |
| asparaginyl-tRNA synthetase [Mus musculus]                                                        | 4 | 0.13299915 | 1.00337121 |
| enoyl Coenzyme A hydratase, short chain, 1, mitochondrial [Mus musculus]                          | 4 | -0.1353901 | 1.95757774 |

|                                                                                                      |   |            |            |
|------------------------------------------------------------------------------------------------------|---|------------|------------|
| valosin containing protein [Mus musculus]                                                            | 4 | 0.20571487 | 0.32710954 |
| spectrin beta 2 isoform 1 [Mus musculus]                                                             | 4 | 0.18279651 | 1.33999521 |
| galactose-4-epimerase, UDP [Mus musculus]                                                            | 4 | 0.00865963 | 26.8606219 |
| TAF15 RNA polymerase II, TATA box binding protein (TBP)-associated factor [Mus musculus]             | 4 | -0.0039151 | 47.1037115 |
| ribosomal protein L4 [Mus musculus]                                                                  | 4 | 0.10357484 | 2.52672178 |
| fatty acid synthase [Mus musculus]                                                                   | 4 | 0.30002925 | 0.54639673 |
| ATPase, Ca <sup>++</sup> transporting, ubiquitous [Mus musculus]                                     | 4 | 0.30449213 | 0.51847546 |
| hypoxia up-regulated 1 [Mus musculus]                                                                | 4 | 0.1451608  | 0.96575466 |
| dihydrolipoamide S-acetyltransferase (E2 component of pyruvate dehydrogenase complex) [Mus musculus] | 4 | -0.1990309 | 0.14466951 |
| nucleolin [Mus musculus]                                                                             | 4 | 0.31249235 | 0.69589312 |
| ribophorin I [Mus musculus]                                                                          | 4 | 0.12352253 | 1.37060586 |
| vinculin [Mus musculus]                                                                              | 4 | -0.2367005 | 1.930249   |
| RAB15, member RAS oncogene family [Mus musculus]                                                     | 4 | 0.19327645 | 0.58076351 |
| aspartyl aminopeptidase [Mus musculus]                                                               | 4 | 0.02030185 | 1.20586855 |
| calponin 1 [Mus musculus]                                                                            | 4 | -0.8905066 | 0.80337998 |
| chaperonin subunit 8 (theta) [Mus musculus]                                                          | 4 | 0.05961206 | 2.05062809 |
| twinfilin [Mus musculus]                                                                             | 4 | -0.0266405 | 3.91391191 |
| integral membrane protein 1 [Mus musculus]                                                           | 4 | 0.14413311 | 1.16644696 |
| 3-hydroxy-3-methylglutaryl-Coenzyme A synthase 2 [Mus musculus]                                      | 4 | -1.1334626 | 0.45841633 |
| laminin, gamma 1 [Mus musculus]                                                                      | 4 | -0.0611634 | 8.7553334  |
| ATP synthase, H <sup>+</sup> transporting mitochondrial F1 complex, beta subunit [Mus musculus]      | 4 | -0.1523011 | 0.13239713 |
| glucosamine [Mus musculus]                                                                           | 4 | 0.26590517 | 0.84597234 |
| phosphoglucomutase 2 [Mus musculus]                                                                  | 4 | -0.2819567 | 0.57829681 |
| UMP-CMP kinase [Mus musculus]                                                                        | 4 | 0.07114116 | 1.44397026 |
| sulfide quinone reductase-like [Mus musculus]                                                        | 4 | 0.01029785 | 10.9722126 |
| pyruvate kinase 3 [Mus musculus]                                                                     | 4 | 0.05442212 | 2.3157064  |
| carbonic anhydrase 2 [Mus musculus]                                                                  | 4 | -0.6186321 | 0.29052088 |
| heat shock protein 1 (chaperonin) [Mus musculus]                                                     | 4 | 0.09672602 | 1.39012526 |
| heat shock protein 8 [Mus musculus]                                                                  | 4 | 0.03358213 | 3.78176683 |
| heat shock 70kD protein 5 (glucose-regulated protein) [Mus musculus]                                 | 4 | 0.17302599 | 0.95385957 |
| electron transferring flavoprotein, alpha polypeptide [Mus musculus]                                 | 4 | -0.2035377 | 1.16022361 |
| coatomer protein complex subunit alpha [Mus musculus]                                                | 4 | 0.02089924 | 4.54606422 |
| Rho GDP dissociation inhibitor (GDI) alpha [Mus musculus]                                            | 4 | 0.17322075 | 0.63317428 |
| malate dehydrogenase 1, NAD (soluble) [Mus musculus]                                                 | 4 | -0.1169494 | 0.33112353 |
| malate dehydrogenase 2, NAD (mitochondrial) [Mus musculus]                                           | 4 | -0.1193455 | 0.67428169 |
| heat shock protein 4 [Mus musculus]                                                                  | 4 | 0.00691661 | 15.0773323 |
| LIM domain containing preferred translocation partner in lipoma [Mus musculus]                       | 4 | -0.3603692 | 0.89736188 |
| acetyl-Coenzyme A dehydrogenase, long-chain [Mus musculus]                                           | 4 | -0.2879519 | 1.98659247 |
| acyl-Coenzyme A dehydrogenase, short chain [Mus musculus]                                            | 4 | -0.3039429 | 0.40564701 |
| vimentin [Mus musculus]                                                                              | 4 | -0.194792  | 1.02190175 |
| acyl-Coenzyme A binding domain containing 3 [Mus musculus]                                           | 4 | -0.2423527 | 0.42994932 |
| desmin [Mus musculus]                                                                                | 4 | -0.9826558 | 0.80204926 |
| oxoglutarate dehydrogenase (lipoamide) [Mus musculus]                                                | 4 | -0.2678196 | 0.23157758 |
| heterogeneous nuclear ribonucleoprotein L [Mus musculus]                                             | 4 | 0.0156126  | 12.7215391 |
| eukaryotic translation elongation factor 2 [Mus musculus]                                            | 4 | 0.171377   | 0.43696918 |
| laminin B1 subunit 1 [Mus musculus]                                                                  | 4 | -0.0819368 | 6.57200322 |
| albumin 1 [Mus musculus]                                                                             | 4 | -0.560265  | 1.279833   |
| fumarate hydratase 1 [Mus musculus]                                                                  | 4 | -0.3955488 | 0.52206183 |
| phosphoglucomutase 1 [Mus musculus]                                                                  | 4 | -0.2196599 | 2.72931816 |
| thioredoxin domain containing 1 [Mus musculus]                                                       | 4 | 0.17605075 | 1.28161699 |
| hydroxyacyl-Coenzyme A dehydrogenase/3-ketoacyl-Coenzyme A thiolase/enoyl-Coenzyme A hydratase (tri  | 4 | -0.0737927 | 1.69757498 |
| valyl-tRNA synthetase 2 [Mus musculus]                                                               | 4 | 0.19235431 | 0.77058215 |
| histone 1, H1d [Mus musculus]                                                                        | 4 | 0.64910592 | 0.9418452  |
| splicing factor 3a, subunit 1 [Mus musculus]                                                         | 4 | 0.36991029 | 0.37166988 |
| ribophorin II [Mus musculus]                                                                         | 4 | 0.02733034 | 4.92931341 |
| procollagen, type IV, alpha 2 [Mus musculus]                                                         | 4 | -0.2459865 | 1.59480829 |
| epiplakin 1 [Mus musculus]                                                                           | 4 | -0.0627455 | 4.45061112 |
| myosin, light polypeptide kinase telokin isoform [Mus musculus]                                      | 4 | -1.2742017 | 0.50050654 |
| PREDICTED: expressed sequence A1427122 [Mus musculus]                                                | 4 | -0.0750344 | 3.69476557 |
| p47 protein [Mus musculus]                                                                           | 4 | 0.10395519 | 1.90719164 |
| dihydropyrimidinase-like 2 [Mus musculus]                                                            | 4 | -0.0599266 | 4.84127302 |

|                                                                                                     |   |            |            |
|-----------------------------------------------------------------------------------------------------|---|------------|------------|
| heat shock protein 1, beta [Mus musculus]                                                           | 4 | 0.23803219 | 0.51422993 |
| guanine nucleotide binding protein, alpha inhibiting 2 [Mus musculus]                               | 4 | 0.21441998 | 0.72519725 |
| prolyl 4-hydroxylase, beta polypeptide [Mus musculus]                                               | 4 | 0.10243332 | 1.22934662 |
| UDP-glucose ceramide glucosyltransferase-like 1 [Mus musculus]                                      | 4 | 0.15867821 | 0.47230234 |
| integrin beta 1 (fibronectin receptor beta) [Mus musculus]                                          | 4 | -0.5881245 | 0.59956405 |
| superoxide dismutase 1, soluble [Mus musculus]                                                      | 4 | -0.2736179 | 0.30312598 |
| thioredoxin domain containing 5 [Mus musculus]                                                      | 4 | -0.0716824 | 3.62259079 |
| dolichyl-di-phosphooligosaccharide-protein glycotransferase [Mus musculus]                          | 4 | -0.0407002 | 4.30885271 |
| eukaryotic translation initiation factor 3, subunit 10 (theta) [Mus musculus]                       | 4 | 0.25921817 | 0.53823862 |
| ubiquinol-cytochrome c reductase core protein 1 [Mus musculus]                                      | 4 | -0.0834791 | 0.52700474 |
| lectin, galactose binding, soluble 4 [Mus musculus]                                                 | 4 | 0.00253351 | 84.9703223 |
| potassium channel tetramerisation domain containing 12 [Mus musculus]                               | 4 | 0.50406907 | 0.62606945 |
| lamin A isoform A [Mus musculus]                                                                    | 4 | -0.1721229 | 1.20682715 |
| clathrin, heavy polypeptide (Hc) [Mus musculus]                                                     | 4 | 0.06278635 | 0.82167969 |
| hydroxyacyl-Coenzyme A dehydrogenase type II [Mus musculus]                                         | 4 | -0.1563728 | 0.82545184 |
| PREDICTED: myosin IA [Mus musculus]                                                                 | 4 | -0.1371357 | 0.74961279 |
| PREDICTED: hypothetical protein LOC68693 [Mus musculus]                                             | 4 | 0.12464096 | 0.58059259 |
| PREDICTED: proline-rich polypeptide 6 [Mus musculus]                                                | 4 | -0.1699128 | 1.43654045 |
| eukaryotic translation elongation factor 1 alpha 1 [Mus musculus]                                   | 4 | 0.14806069 | 1.0031964  |
| hypothetical protein LOC229317 [Mus musculus]                                                       | 4 | 0.13230206 | 1.13082588 |
| succinate dehydrogenase Fp subunit [Mus musculus]                                                   | 4 | -0.1564041 | 0.97761668 |
| EH-domain containing 2 [Mus musculus]                                                               | 4 | -0.2484624 | 0.72642074 |
| guanosine diphosphate (GDP) dissociation inhibitor 3 [Mus musculus]                                 | 4 | 0.28211588 | 0.48927138 |
| basic transcription factor 3 [Mus musculus]                                                         | 4 | 0.197808   | 0.78533431 |
| protein disulfide isomerase-associated 6 [Mus musculus]                                             | 4 | 0.2645812  | 0.3772257  |
| Ribosomal protein L18A [Mus musculus]                                                               | 4 | 0.06425019 | 3.81948517 |
| isocitrate dehydrogenase 1 (NADP+), soluble [Mus musculus]                                          | 4 | 0.01057418 | 29.6003713 |
| PREDICTED: tensin [Mus musculus]                                                                    | 4 | -0.9816796 | 0.65821227 |
| PREDICTED: procollagen, type VI, alpha 3 [Mus musculus]                                             | 4 | -0.5155474 | 1.50583863 |
| PREDICTED: catenin src [Mus musculus]                                                               | 4 | 0.0304292  | 8.74999615 |
| PREDICTED: similar to Spectrin alpha chain, brain (Spectrin, non-erythroid alpha chain) (Alpha-II s | 4 | -0.026202  | 8.34097168 |
| PREDICTED: spectrin alpha 2 [Mus musculus]                                                          | 4 | -0.2251138 | 0.45701269 |
| PREDICTED: ribosome binding protein 1 [Mus musculus]                                                | 4 | 0.22154606 | 0.68163139 |
| PREDICTED: ADP-ribosylation factor interacting protein 1 [Mus musculus]                             | 4 | 0.0310198  | 5.52929318 |
| PREDICTED: similar to phosphoglycerate mutase (EC 5.4.2.1) B chain - rat [Mus musculus]             | 4 | 0.18853975 | 0.58796582 |
| PREDICTED: phosphogluconate dehydrogenase [Mus musculus]                                            | 4 | 0.1765761  | 1.29193059 |
| PREDICTED: SEC31-like 1 [Mus musculus]                                                              | 4 | -0.4385693 | 0.93092157 |
| PREDICTED: filamin C, gamma [Mus musculus]                                                          | 4 | -0.5744432 | 1.12898134 |
| PREDICTED: echinoderm microtubule associated protein like 2 [Mus musculus]                          | 4 | -0.1484434 | 0.6147311  |
| PREDICTED: RIKEN cDNA A430096B05 gene [Mus musculus]                                                | 4 | 0.9135558  | 1.01217169 |
| PREDICTED: similar to 40S ribosomal protein S9 [Mus musculus]                                       | 4 | 0.26939752 | 0.14456866 |
| PREDICTED: similar to secreted gel-forming mucin [Mus musculus]                                     | 4 | 0.1270158  | 4.1294081  |
| PREDICTED: source of immunodominant MHC-associated peptides [Mus musculus]                          | 4 | 0.13400027 | 0.6408632  |
| PREDICTED: RNA binding motif protein 25 [Mus musculus]                                              | 4 | 0.3097838  | 1.19232437 |
| PREDICTED: desmoplakin [Mus musculus]                                                               | 4 | 0.3503902  | 0.55256971 |
| PREDICTED: filamin B, beta [Mus musculus]                                                           | 4 | 0.34497013 | 0.16673125 |
| PREDICTED: plexin B2 [Mus musculus]                                                                 | 4 | -0.1135128 | 1.54276901 |
| PREDICTED: similar to AHNAK [Mus musculus]                                                          | 4 | -0.0795777 | 1.85713286 |
| PREDICTED: filamin, alpha [Mus musculus]                                                            | 4 | -0.5176137 | 1.1861515  |
| catenin beta [Mus musculus]                                                                         | 3 | 0.31779032 | 0.9407477  |
| chaperonin subunit 5 (epsilon) [Mus musculus]                                                       | 3 | -0.094561  | 1.94428079 |
| ribosomal protein L22 [Mus musculus]                                                                | 3 | 0.45670843 | 1.25313882 |
| serine (or cysteine) proteinase inhibitor, clade B, member 6a [Mus musculus]                        | 3 | -0.0821999 | 2.59466246 |
| myosin VI [Mus musculus]                                                                            | 3 | 0.0509219  | 3.86071609 |
| osteoglycin [Mus musculus]                                                                          | 3 | -0.7960642 | 0.62021538 |
| pyruvate carboxylase [Mus musculus]                                                                 | 3 | -0.4862013 | 0.84543743 |
| pyruvate dehydrogenase E1 alpha 1 [Mus musculus]                                                    | 3 | -0.0999651 | 0.90056873 |
| proteoglycan 2, bone marrow [Mus musculus]                                                          | 3 | 0.94009502 | 1.1144856  |
| polypyrimidine tract binding protein 1 [Mus musculus]                                               | 3 | 0.07567322 | 1.20713851 |
| RAB1, member RAS oncogene family [Mus musculus]                                                     | 3 | -0.0796665 | 1.32622907 |
| RAB7, member RAS oncogene family [Mus musculus]                                                     | 3 | 0.12698518 | 0.78573102 |
| UDP-N-acetyl-alpha-D-galactosamine: (N-acetylneuraminy)-galactosyl-N- acetylglucosaminylpolypeptid  | 3 | 0.12577227 | 5.61902562 |

|                                                                                                     |   |            |            |
|-----------------------------------------------------------------------------------------------------|---|------------|------------|
| glutathione synthetase [Mus musculus]                                                               | 3 | 0.11350875 | 2.50082108 |
| L-3-hydroxyacyl-Coenzyme A dehydrogenase, short chain [Mus musculus]                                | 3 | -0.3979874 | 0.05165834 |
| gelsolin-like capping protein [Mus musculus]                                                        | 3 | 0.55630737 | 1.03839516 |
| deleted in malignant brain tumors 1 [Mus musculus]                                                  | 3 | -0.3343247 | 0.56400093 |
| decorin [Mus musculus]                                                                              | 3 | -0.6655112 | 0.69666462 |
| catalase [Mus musculus]                                                                             | 3 | 0.1123777  | 1.38067765 |
| chaperonin subunit 4 (delta) [Mus musculus]                                                         | 3 | -0.2633904 | 0.95323938 |
| cadherin 1 [Mus musculus]                                                                           | 3 | -0.1520125 | 0.65564288 |
| glutamate oxaloacetate transaminase 2, mitochondrial [Mus musculus]                                 | 3 | -0.1268271 | 0.65279808 |
| lymphocyte antigen 64 [Mus musculus]                                                                | 3 | 0.02889434 | 5.70279269 |
| peroxiredoxin 1 [Mus musculus]                                                                      | 3 | 0.10229226 | 0.66065707 |
| 3'-phosphoadenosine 5'-phosphosulfate synthase 2 [Mus musculus]                                     | 3 | 0.18661325 | 3.64630337 |
| proteasome (prosome, macropain) subunit, beta type 5 [Mus musculus]                                 | 3 | -0.3933425 | 1.48025787 |
| THO complex 4 [Mus musculus]                                                                        | 3 | 0.24543546 | 0.85011826 |
| tripartite motif protein 28 [Mus musculus]                                                          | 3 | 0.46157189 | 0.29358822 |
| thioredoxin 1 [Mus musculus]                                                                        | 3 | -0.189119  | 0.6766844  |
| legumain [Mus musculus]                                                                             | 3 | 0.0829425  | 2.58403024 |
| metaxin 1 [Mus musculus]                                                                            | 3 | -0.4708815 | 0.4049402  |
| tight junction protein 2 [Mus musculus]                                                             | 3 | -0.0050378 | 32.8652433 |
| IQ motif containing GTPase activating protein 1 [Mus musculus]                                      | 3 | -0.1532492 | 1.30751724 |
| phosphomannomutase 2 [Mus musculus]                                                                 | 3 | -0.0686719 | 1.87375371 |
| phosphofructokinase, platelet [Mus musculus]                                                        | 3 | -1.3183786 | 0.6087737  |
| HLA-B-associated transcript 1A [Mus musculus]                                                       | 3 | 0.34941132 | 0.64147482 |
| destrin [Mus musculus]                                                                              | 3 | -0.6022783 | 0.26133748 |
| Trk-fused gene [Mus musculus]                                                                       | 3 | 0.26251605 | 0.72768685 |
| RNA binding motif protein 14 [Mus musculus]                                                         | 3 | -0.0326626 | 1.14631045 |
| glutathione S-transferase, pi 1 [Mus musculus]                                                      | 3 | -0.2415128 | 1.66200328 |
| PDZ and LIM domain 5 isoform ENH1 [Mus musculus]                                                    | 3 | -0.017203  | 9.93585788 |
| actin related protein 2/3 complex, subunit 1B [Mus musculus]                                        | 3 | 0.58699404 | 0.44364305 |
| ETHE1 protein [Mus musculus]                                                                        | 3 | 0.14153549 | 3.05138631 |
| NADH dehydrogenase (ubiquinone) 1 alpha subcomplex, 9 [Mus musculus]                                | 3 | 0.0243724  | 7.00351905 |
| propionyl Coenzyme A carboxylase, beta polypeptide [Mus musculus]                                   | 3 | -0.2030351 | 1.23162117 |
| TNF receptor-associated protein 1 [Mus musculus]                                                    | 3 | 0.02371003 | 8.38684698 |
| ribosomal protein S13 [Mus musculus]                                                                | 3 | 0.62635948 | 0.32182328 |
| histone 1, H1e [Mus musculus]                                                                       | 3 | -0.4072501 | 1.74672074 |
| thioredoxin reductase 1 [Mus musculus]                                                              | 3 | -0.1989723 | 0.60123957 |
| hypothetical protein LOC94184 [Mus musculus]                                                        | 3 | -0.2037463 | 1.47283241 |
| ribosomal protein L31 [Mus musculus]                                                                | 3 | 0.2845394  | 0.73425695 |
| isocitrate dehydrogenase 3, beta subunit [Mus musculus]                                             | 3 | 0.038482   | 5.06346848 |
| DAZ associated protein 1 [Mus musculus]                                                             | 3 | 0.35478593 | 0.52653474 |
| splicing factor 3b, subunit 3 [Mus musculus]                                                        | 3 | -0.043024  | 4.48219623 |
| proteasome 26S non-ATPase subunit 2 [Mus musculus]                                                  | 3 | 0.34440977 | 0.66497738 |
| phosphatidate cytidyltransferase 2 [Mus musculus]                                                   | 3 | -0.2668832 | 1.49236284 |
| ATPase, H+/K+ transporting, nongastric, alpha polypeptide [Mus musculus]                            | 3 | -1.7169975 | 0.16600915 |
| gasdermin domain containing 1 [Mus musculus]                                                        | 3 | 0.23232694 | 1.65167533 |
| NADH dehydrogenase (ubiquinone) Fe-S protein 7 [Mus musculus]                                       | 3 | -0.2145407 | 1.68272117 |
| inner membrane protein, mitochondrial [Mus musculus]                                                | 3 | 0.03343494 | 4.726608   |
| hypothetical protein LOC78906 [Mus musculus]                                                        | 3 | 0.0013977  | 302.63163  |
| histone 1, H1b [Mus musculus]                                                                       | 3 | 0.36281657 | 0.62412716 |
| aldolase 2, B isoform [Mus musculus]                                                                | 3 | -0.1346734 | 1.61266815 |
| UDP-GlcNAc:betaGal beta-1,3-N-acetylglucosaminyltransferase 7 [Mus musculus]                        | 3 | 0.07881911 | 7.79172829 |
| hydroxyacyl-Coenzyme A dehydrogenase/3-ketoacyl-Coenzyme A thiolase/enoyl-Coenzyme A hydratase (tri | 3 | -0.0857818 | 0.59331903 |
| cytidine monophospho-N-acetylneuraminic acid synthetase [Mus musculus]                              | 3 | -0.4436457 | 0.57336968 |
| acyl-Coenzyme A dehydrogenase, very long chain [Mus musculus]                                       | 3 | -0.2815283 | 0.66304622 |
| cisplatin resistance-associated overexpressed protein [Mus musculus]                                | 3 | -1.5414419 | 1.14961307 |
| HIV TAT specific factor 1 [Mus musculus]                                                            | 3 | 0.05859354 | 2.04829026 |
| splicing factor proline/glutamine rich (polypyrimidine tract binding protein associated) [Mus muscu | 3 | 0.25329798 | 0.57459365 |
| SPFH domain family, member 2 [Mus musculus]                                                         | 3 | 0.69042976 | 0.29758385 |
| calcium-binding transporter [Mus musculus]                                                          | 3 | -0.2956967 | 0.81275394 |
| paraoxonase 3 [Mus musculus]                                                                        | 3 | -0.4476431 | 1.01479218 |
| isocitrate dehydrogenase 2 (NADP+), mitochondrial [Mus musculus]                                    | 3 | -0.2725449 | 0.23419968 |
| aldehyde dehydrogenase 1 family, member L1 [Mus musculus]                                           | 3 | -0.1516642 | 2.25911513 |

|                                                                                                     |   |            |            |
|-----------------------------------------------------------------------------------------------------|---|------------|------------|
| asporin [Mus musculus]                                                                              | 3 | -0.8331736 | 0.65695767 |
| melanoma inhibitory activity 3 [Mus musculus]                                                       | 3 | 0.07355365 | 0.39595522 |
| SEC24 related gene family, member C [Mus musculus]                                                  | 3 | 0.52048204 | 0.24725866 |
| RAB5C, member RAS oncogene family [Mus musculus]                                                    | 3 | 0.16301986 | 1.53894189 |
| eukaryotic translation initiation factor 3, subunit 9 [Mus musculus]                                | 3 | 0.60842607 | 0.96809243 |
| ELAV (embryonic lethal, abnormal vision, Drosophila)-like 1 (Hu antigen R) [Mus musculus]           | 3 | -0.1753359 | 1.02480142 |
| karyopherin (importin) beta 1 [Mus musculus]                                                        | 3 | 0.3294925  | 1.29502251 |
| phosphoglucomutase 3 [Mus musculus]                                                                 | 3 | 0.04532621 | 3.72164989 |
| PYD and CARD domain containing [Mus musculus]                                                       | 3 | -0.0197345 | 14.4464438 |
| peroxiredoxin 2 [Mus musculus]                                                                      | 3 | 0.11067483 | 1.98258995 |
| eukaryotic translation initiation factor 5A [Mus musculus]                                          | 3 | 0.00568369 | 34.1382684 |
| mannosidase, beta A, lysosomal [Mus musculus]                                                       | 3 | -0.8844496 | 0.08929329 |
| kallikrein 6 [Mus musculus]                                                                         | 3 | 0.45367835 | 1.70042369 |
| SEC23B [Mus musculus]                                                                               | 3 | -0.0794984 | 5.95572033 |
| CNDP dipeptidase 2 (metallopeptidase M20 family) [Mus musculus]                                     | 3 | 0.87118761 | 0.73088605 |
| Rho GTPase activating protein 1 [Mus musculus]                                                      | 3 | 0.17168706 | 3.26031658 |
| stromal interaction molecule 1 [Mus musculus]                                                       | 3 | -0.2674652 | 0.96303161 |
| phospholipase C, beta 3 [Mus musculus]                                                              | 3 | -0.0593228 | 4.81555166 |
| laminin, beta 2 [Mus musculus]                                                                      | 3 | -0.3129002 | 3.75959691 |
| LYRIC [Mus musculus]                                                                                | 3 | 0.09085162 | 5.16409    |
| parvin, alpha [Mus musculus]                                                                        | 3 | -0.4086954 | 0.85498143 |
| aconitase 1 [Mus musculus]                                                                          | 3 | -0.1104449 | 2.7072014  |
| NADH dehydrogenase (ubiquinone) 1 alpha subcomplex, 4 [Mus musculus]                                | 3 | 0.15188833 | 0.62151329 |
| proteasome (prosome, macropain) subunit, alpha type 1 [Mus musculus]                                | 3 | 0.18309309 | 1.85788911 |
| galectin-3 [Mus musculus]                                                                           | 3 | -0.0711774 | 5.77537905 |
| protein phosphatase 1B, magnesium dependent, beta isoform [Mus musculus]                            | 3 | -0.3053981 | 1.8462173  |
| tryptophanyl-tRNA synthetase [Mus musculus]                                                         | 3 | -0.1817567 | 1.7191634  |
| succinate dehydrogenase Ip subunit [Mus musculus]                                                   | 3 | -0.2914384 | 0.29801504 |
| splicing factor, arginine/serine-rich 1 (ASF/SF2) [Mus musculus]                                    | 3 | 0.06555096 | 2.23997369 |
| glutathione reductase 1 [Mus musculus]                                                              | 3 | -0.2075467 | 1.4132776  |
| cytochrome c oxidase subunit II [Mus musculus]                                                      | 3 | -0.3811063 | 0.35295777 |
| bisphosphate 3'-nucleotidase 1 [Mus musculus]                                                       | 3 | -0.4570413 | 2.90541169 |
| loss of heterozygosity, 11, chromosomal region 2, gene A homolog [Mus musculus]                     | 3 | -0.04361   | 10.8365574 |
| metastasis-associated protein 2 [Mus musculus]                                                      | 3 | 0.22321027 | 1.23287268 |
| KH-type splicing regulatory protein [Mus musculus]                                                  | 3 | 0.04843223 | 3.86704394 |
| PREDICTED: similar to Filamin C (Gamma-filamin) (Filamin 2) (Protein FLNc) (Actin-binding like prot | 3 | -0.6544431 | 1.28774549 |
| PREDICTED: TBP-interacting protein [Mus musculus]                                                   | 3 | -0.0507855 | 7.35495478 |
| archain 1 [Mus musculus]                                                                            | 3 | 0.24843432 | 0.36999652 |
| actinin alpha 2 [Mus musculus]                                                                      | 3 | -1.0287186 | 0.41203515 |
| PREDICTED: glutamyl-prolyl-tRNA synthetase [Mus musculus]                                           | 3 | 0.18834306 | 1.6017046  |
| PREDICTED: RIKEN cDNA 1810009A16 [Mus musculus]                                                     | 3 | 0.24752697 | 0.55929776 |
| PREDICTED: similar to Ras GTPase-activating-like protein IQGAP2 [Mus musculus]                      | 3 | -0.074059  | 2.93284107 |
| PREDICTED: similar to Filamin B (FLN-B) (Beta-filamin) (Actin-binding like protein) (ABP-280-like p | 3 | 0.42396945 | 0.27445919 |
| PREDICTED: synaptopodin 2 [Mus musculus]                                                            | 3 | -0.3295092 | 1.70852071 |
| heterogeneous nuclear ribonucleoprotein D [Mus musculus]                                            | 2 | 0.47693911 | 0.84678038 |
| calpain 1 [Mus musculus]                                                                            | 2 | 0.22224225 | 0.05312572 |
| sorbin and SH3 domain containing 1 [Mus musculus]                                                   | 2 | 0.06296813 | 0.14041553 |
| solute carrier family 12, member 2 [Mus musculus]                                                   | 2 | -0.8836963 | 0.93107732 |
| small nuclear ribonucleoprotein D1 [Mus musculus]                                                   | 2 | -0.0242514 | 3.23649641 |
| transforming growth factor, beta induced [Mus musculus]                                             | 2 | -0.1522927 | 0.40233892 |
| transglutaminase 3, E polypeptide [Mus musculus]                                                    | 2 | -1.7395311 | 0.35702223 |
| triosephosphate isomerase 1 [Mus musculus]                                                          | 2 | 0.65645833 | 0.43666795 |
| lectin, galactose binding, soluble 1 [Mus musculus]                                                 | 2 | -0.1558195 | 6.79282725 |
| leukotriene A4 hydrolase [Mus musculus]                                                             | 2 | -1.2636285 | 0.93229998 |
| purine rich element binding protein A [Mus musculus]                                                | 2 | -0.2986667 | 0.35384761 |
| Ewing sarcoma breakpoint region 1 [Mus musculus]                                                    | 2 | -0.0076133 | 49.0775457 |
| protein phosphatase 1G (formerly 2C), magnesium-dependent, gamma isoform [Mus musculus]             | 2 | -0.3295651 | 0.63416175 |
| heat shock protein 1 (chaperonin 10) [Mus musculus]                                                 | 2 | 0.1602233  | 0.63265392 |
| acetyl-Coenzyme A dehydrogenase, medium chain [Mus musculus]                                        | 2 | 1.44854516 | 0.68976262 |
| peroxiredoxin 3 [Mus musculus]                                                                      | 2 | 0.64232053 | 1.76502521 |
| complement component 1, q subcomponent binding protein [Mus musculus]                               | 2 | -0.1048005 | 1.53328579 |
| caspase 7 [Mus musculus]                                                                            | 2 | -0.4163377 | 0.35368869 |

|                                                                                                     |   |            |            |
|-----------------------------------------------------------------------------------------------------|---|------------|------------|
| procollagen, type XII, alpha 1 [Mus musculus]                                                       | 2 | -0.3241072 | 0.66720282 |
| adaptor protein complex AP-1, mu 2 subunit [Mus musculus]                                           | 2 | 0.24534231 | 1.37619353 |
| adaptor protein complex AP-2, mu1 [Mus musculus]                                                    | 2 | -0.2936933 | 1.21019724 |
| apurinic/aprimidinic endonuclease 1 [Mus musculus]                                                  | 2 | 0.16424203 | 0.03580229 |
| claudin 3 [Mus musculus]                                                                            | 2 | 0.44404801 | 1.70795815 |
| carnitine palmitoyltransferase 2 [Mus musculus]                                                     | 2 | -0.712492  | 0.2152522  |
| DEAD/H (Asp-Glu-Ala-Asp/His) box polypeptide 3, X-linked [Mus musculus]                             | 2 | 0.09410352 | 0.51845442 |
| fibulin 5 [Mus musculus]                                                                            | 2 | -0.703518  | 0.60388771 |
| glutamate oxaloacetate transaminase 1, soluble [Mus musculus]                                       | 2 | -0.1283127 | 7.21641986 |
| glutathione S-transferase, mu 1 [Mus musculus]                                                      | 2 | -0.4661873 | 0.96694009 |
| lamin B2 [Mus musculus]                                                                             | 2 | 0.15080656 | 2.55935483 |
| annexin A1 [Mus musculus]                                                                           | 2 | 0.60231029 | 0.59541442 |
| septin 2 [Mus musculus]                                                                             | 2 | -0.5157029 | 0.33007542 |
| programmed cell death 6 interacting protein [Mus musculus]                                          | 2 | -0.2621915 | 0.45968732 |
| proliferation-associated 2G4 [Mus musculus]                                                         | 2 | 0.00453826 | 52.5102332 |
| peroxiredoxin 5 precursor [Mus musculus]                                                            | 2 | 0.98875759 | 0.11676261 |
| ribosomal protein L8 [Mus musculus]                                                                 | 2 | 0.36174731 | 0.40665931 |
| solute carrier family 12, member 7 [Mus musculus]                                                   | 2 | -0.0420853 | 5.35076029 |
| ubiquitin carboxy-terminal hydrolase L1 [Mus musculus]                                              | 2 | -0.6748813 | 0.8124683  |
| WD repeat domain 1 [Mus musculus]                                                                   | 2 | 0.86348835 | 0.05365835 |
| tyrosine 3-monooxygenase/tryptophan 5-monooxygenase activation protein, theta polypeptide [Mus musc | 2 | 0.19710149 | 0.63470281 |
| glucose-6-phosphate dehydrogenase X-linked [Mus musculus]                                           | 2 | 0.23205358 | 2.41026313 |
| protein kinase C and casein kinase substrate in neurons 2 [Mus musculus]                            | 2 | 0.38973432 | 1.50006686 |
| ras-GTPase-activating protein SH3-domain binding protein [Mus musculus]                             | 2 | 0.1294459  | 1.36897271 |
| ribosomal protein S16 [Mus musculus]                                                                | 2 | 0.32251888 | 0.79297053 |
| trans-acting transcription factor 1 [Mus musculus]                                                  | 2 | 0.06241695 | 6.75744303 |
| ubiquitin specific protease 5 (isopeptidase T) [Mus musculus]                                       | 2 | -0.1181747 | 1.49766902 |
| cullin 3 [Mus musculus]                                                                             | 2 | 0.04234867 | 3.29650172 |
| ARP1 actin-related protein 1 homolog A [Mus musculus]                                               | 2 | -0.5573647 | 0.43344302 |
| ornithine aminotransferase [Mus musculus]                                                           | 2 | -0.6106065 | 0.61956566 |
| Sec61 alpha subunit homolog [Mus musculus]                                                          | 2 | 0.28253759 | 0.35353884 |
| coatamer protein complex, subunit gamma [Mus musculus]                                              | 2 | -0.4183217 | 0.33379184 |
| nucleolar protein 5 [Mus musculus]                                                                  | 2 | 0.2240126  | 2.7147594  |
| ras homolog gene family, member G [Mus musculus]                                                    | 2 | 0.07553338 | 3.34404937 |
| glycogen synthase kinase 3 beta [Mus musculus]                                                      | 2 | -0.1343946 | 7.18054433 |
| phospholipase C, delta 1 [Mus musculus]                                                             | 2 | -0.1964855 | 1.71775745 |
| heterogeneous nuclear ribonucleoprotein H2 [Mus musculus]                                           | 2 | -0.1871837 | 0.48220687 |
| histone 1, H1c [Mus musculus]                                                                       | 2 | 0.40681681 | 0.50576422 |
| dopa/tyrosine sulfotransferase [Mus musculus]                                                       | 2 | -0.3009367 | 0.26221205 |
| succinate-CoA ligase, GDP-forming, alpha subunit [Mus musculus]                                     | 2 | -0.0182175 | 6.25700859 |
| transmembrane protein 4 [Mus musculus]                                                              | 2 | 0.72663109 | 0.70863957 |
| aldo-keto reductase family 1, member A4 (aldehyde reductase) [Mus musculus]                         | 2 | -0.0521604 | 1.9178939  |
| heterogeneous nuclear ribonucleoprotein H1 [Mus musculus]                                           | 2 | -0.3173339 | 0.76377477 |
| RAB2, member RAS oncogene family [Mus musculus]                                                     | 2 | 0.20903319 | 1.10233994 |
| epsilon subunit of coatamer protein complex [Mus musculus]                                          | 2 | 1.62130666 | 1.4652339  |
| stromal cell-derived factor 2-like 1 [Mus musculus]                                                 | 2 | 0.20439031 | 2.40349426 |
| cathepsin Z preproprotein [Mus musculus]                                                            | 2 | 0.8724273  | 0.6922586  |
| epithelial protein lost in neoplasm [Mus musculus]                                                  | 2 | 0.36871696 | 3.02434174 |
| microsomal glutathione S-transferase 3 [Mus musculus]                                               | 2 | -0.0916688 | 1.71629395 |
| sorcini [Mus musculus]                                                                              | 2 | -0.1991013 | 1.763696   |
| PAI-1 mRNA-binding protein [Mus musculus]                                                           | 2 | 0.15973249 | 0.08359346 |
| ADP-ribosylation factor-like 1 [Mus musculus]                                                       | 2 | 0.38583025 | 0.74488271 |
| RAB5A, member RAS oncogene family [Mus musculus]                                                    | 2 | 0.01618517 | 32.6076597 |
| sorting nexin 2 [Mus musculus]                                                                      | 2 | -0.3219641 | 2.1621524  |
| RNA (guanine-7-) methyltransferase [Mus musculus]                                                   | 2 | 1.02949119 | 0.50396785 |
| kinesin-like 8 [Mus musculus]                                                                       | 2 | 0.10947632 | 0.31751651 |
| ribosomal protein S10 [Mus musculus]                                                                | 2 | 0.31466255 | 0.50142452 |
| type 1 tumor necrosis factor receptor shedding aminopeptidase regulator [Mus musculus]              | 2 | 0.63155169 | 0.76789781 |
| A kinase (PRKA) anchor protein (gravin) 12 [Mus musculus]                                           | 2 | -0.5295483 | 0.08358624 |
| vacuolar protein sorting 35 [Mus musculus]                                                          | 2 | 0.18749312 | 0.58130439 |
| esterase D/formylglutathione hydrolase [Mus musculus]                                               | 2 | 0.00438004 | 63.4973091 |
| arsenate resistance protein 2 [Mus musculus]                                                        | 2 | -0.441676  | 1.72352449 |



|                                                                                                 |   |            |            |
|-------------------------------------------------------------------------------------------------|---|------------|------------|
| snRNP core protein SMX5 [Mus musculus]                                                          | 2 | 0.13244307 | 3.52636899 |
| ADP-ribosylation factor-like 6 interacting protein 5 [Mus musculus]                             | 2 | -0.1110804 | 2.32813853 |
| myosin VIIb [Mus musculus]                                                                      | 2 | 0.37414463 | 0.05247365 |
| stress-induced phosphoprotein 1 [Mus musculus]                                                  | 2 | -0.0879798 | 0.68618664 |
| sideroflexin 1 [Mus musculus]                                                                   | 2 | -0.326387  | 0.95873792 |
| cyclin M4 [Mus musculus]                                                                        | 2 | -0.6690835 | 0.73079571 |
| ribosomal protein 10 [Mus musculus]                                                             | 2 | 0.59411718 | 1.62409202 |
| lysyl-tRNA synthetase [Mus musculus]                                                            | 2 | 0.10340181 | 1.26010516 |
| sorting nexin 5 [Mus musculus]                                                                  | 2 | 0.36328928 | 0.48808648 |
| GDP-mannose pyrophosphorylase A [Mus musculus]                                                  | 2 | -0.1689308 | 1.61213769 |
| dipeptidylpeptidase III [Mus musculus]                                                          | 2 | 0.10225013 | 0.42591958 |
| high density lipoprotein binding protein [Mus musculus]                                         | 2 | 0.72360288 | 1.38128382 |
| proteasome 26S non-ATPase subunit 3 [Mus musculus]                                              | 2 | 0.10429947 | 0.81202017 |
| RAN binding protein 2 [Mus musculus]                                                            | 2 | -0.1253801 | 2.11912061 |
| transferrin [Mus musculus]                                                                      | 2 | -0.3591633 | 0.19721024 |
| LUC7-like 2 [Mus musculus]                                                                      | 2 | -0.0210931 | 9.19528188 |
| transmembrane trafficking protein [Mus musculus]                                                | 2 | -0.2016373 | 0.50148426 |
| lectin, mannose-binding, 1 [Mus musculus]                                                       | 2 | 0.17228923 | 3.29668674 |
| GTP-binding protein PTD004 [Mus musculus]                                                       | 2 | 0.43502565 | 0.570894   |
| RAB1B, member RAS oncogene family [Mus musculus]                                                | 2 | 0.37515596 | 1.04325207 |
| heterogeneous nuclear ribonucleoprotein M [Mus musculus]                                        | 2 | 0.1764862  | 0.33876312 |
| zinc binding alcohol dehydrogenase, domain containing 1 [Mus musculus]                          | 2 | 0.02145902 | 17.0980465 |
| acetoacetyl-CoA synthetase [Mus musculus]                                                       | 2 | 0.60359849 | 0.33203486 |
| adaptor-related protein complex 2, beta 1 subunit [Mus musculus]                                | 2 | 0.97867274 | 1.08133228 |
| leucine-rich PPR motif-containing protein [Mus musculus]                                        | 2 | -0.1355153 | 1.11935021 |
| propionyl-Coenzyme A carboxylase, alpha polypeptide [Mus musculus]                              | 2 | -0.5032982 | 1.29929675 |
| EIB-55kDa associated protein 5 [Mus musculus]                                                   | 2 | 0.37692531 | 1.37652145 |
| ATP synthase, H+ transporting, mitochondrial F1 complex, delta subunit precursor [Mus musculus] | 2 | -0.4990856 | 0.44254887 |
| arginyl aminopeptidase (aminopeptidase B) [Mus musculus]                                        | 2 | -0.0572289 | 2.25236012 |
| malic enzyme 2, NAD(+)-dependent, mitochondrial [Mus musculus]                                  | 2 | -0.4565551 | 0.0080073  |
| carboxylesterase 2 [Mus musculus]                                                               | 2 | -1.0190046 | 0.47124476 |
| suppressor of Ty 5 homolog [Mus musculus]                                                       | 2 | 0.46007715 | 0.61415391 |
| translocase of inner mitochondrial membrane 50 homolog [Mus musculus]                           | 2 | 0.03912878 | 8.21091124 |
| AHA1, activator of heat shock 90kDa protein ATPase homolog 1 [Mus musculus]                     | 2 | 0.32564862 | 0.08610305 |
| G1 to S phase transition 1 [Mus musculus]                                                       | 2 | 0.50945209 | 1.60162062 |
| SH3 domain protein 3 [Mus musculus]                                                             | 2 | 0.79156613 | 1.41824302 |
| desmoglein 2 [Mus musculus]                                                                     | 2 | 0.23598002 | 0.04771851 |
| ARP3 actin-related protein 3 homolog [Mus musculus]                                             | 2 | 0.44363252 | 0.43382062 |
| matrin 3 [Mus musculus]                                                                         | 2 | 0.60925067 | 1.3096516  |
| pyridoxal (pyridoxine, vitamin B6) kinase [Mus musculus]                                        | 2 | -0.2640471 | 0.88027228 |
| threonyl-tRNA synthetase [Mus musculus]                                                         | 2 | 0.47167971 | 0.69806449 |
| carboxylesterase 5 [Mus musculus]                                                               | 2 | 0.23963109 | 1.3613492  |
| carbonyl reductase 3 [Mus musculus]                                                             | 2 | -0.1853049 | 0.84543705 |
| integrin beta 4 binding protein [Mus musculus]                                                  | 2 | -0.0777761 | 0.48804161 |
| DnaJ (Hsp40) homolog, subfamily B, member 11 [Mus musculus]                                     | 2 | 0.56089606 | 0.1168932  |
| deoxyribose-phosphate aldolase-like [Mus musculus]                                              | 2 | 0.83709567 | 0.36220208 |
| stromal membrane-associated protein 1 [Mus musculus]                                            | 2 | 0.59482719 | 2.07103502 |
| cell division cycle 10 homolog [Mus musculus]                                                   | 2 | -0.1264313 | 0.62147824 |
| RAD21 homolog [Mus musculus]                                                                    | 2 | 0.11886341 | 1.65987939 |
| junction plakoglobin [Mus musculus]                                                             | 2 | 0.32768523 | 0.34698888 |
| PREDICTED: glutaminase [Mus musculus]                                                           | 2 | -0.464225  | 0.42270537 |
| SEC13 related gene [Mus musculus]                                                               | 2 | -0.1562082 | 0.76194527 |
| GDP-mannose pyrophosphorylase B [Mus musculus]                                                  | 2 | 0.05798235 | 9.01714605 |
| hypothetical protein LOC331063 [Mus musculus]                                                   | 2 | -0.0304939 | 62.112236  |
| thyroid hormone receptor associated protein 3 [Mus musculus]                                    | 2 | 0.19270294 | 0.99453802 |
| erythrocyte protein band 4.1-like 2 [Mus musculus]                                              | 2 | 0.51808289 | 1.30923905 |
| hypothetical protein LOC109154 [Mus musculus]                                                   | 2 | -0.0149784 | 16.9757651 |
| transgelin 2 [Mus musculus]                                                                     | 2 | -0.4847652 | 1.20905693 |
| UDP-N-acetylglucosamine pyrophosphorylase 1 homolog [Mus musculus]                              | 2 | 1.89693497 | 1.10382183 |
| glycyl-tRNA synthetase [Mus musculus]                                                           | 2 | 0.51552361 | 0.34601443 |
| splicing factor 3b, subunit 2 [Mus musculus]                                                    | 2 | 1.21081467 | 1.9377227  |
| retinoic acid induced 3 [Mus musculus]                                                          | 2 | -0.2891103 | 0.05150348 |

|                                                                                                      |   |            |            |
|------------------------------------------------------------------------------------------------------|---|------------|------------|
| isochorismatase domain containing 1 [Mus musculus]                                                   | 2 | 0.02307004 | 66.095667  |
| lymphocyte cytosolic protein 1 [Mus musculus]                                                        | 2 | 1.24400131 | 0.45213614 |
| thioredoxin-like 1 [Mus musculus]                                                                    | 2 | 0.71049489 | 0.46229196 |
| tyrosine 3-monooxygenase/tryptophan 5-monooxygenase activation protein, beta polypeptide [Mus muscu] | 2 | -0.6377791 | 0.6306556  |
| eukaryotic translation termination factor 1 [Mus musculus]                                           | 2 | 0.4460432  | 1.34735988 |
| solute carrier family 6 (neurotransmitter transporter), member 14 [Mus musculus]                     | 2 | 0.4381605  | 1.39239214 |
| phosphofructokinase, liver, B-type [Mus musculus]                                                    | 2 | -0.6086248 | 0.52785965 |
| ATPase, H+ transporting, V1 subunit A, isoform 1 [Mus musculus]                                      | 2 | 0.35811919 | 1.24636705 |
| adenylosuccinate synthetase, non muscle [Mus musculus]                                               | 2 | 0.14405195 | 2.40434443 |
| premature ovarian failure 1B [Mus musculus]                                                          | 2 | 2.74923634 | 0.80190256 |
| Inositol (myo)-1(or 4)-monophosphatase 1 [Mus musculus]                                              | 2 | 0.06339793 | 1.02165034 |
| transmembrane 9 superfamily member 2 [Mus musculus]                                                  | 2 | 0.08081205 | 1.52466116 |
| ladinin [Mus musculus]                                                                               | 2 | 0.31602406 | 0.44750622 |
| polymeric immunoglobulin receptor [Mus musculus]                                                     | 2 | -0.232895  | 0.49689611 |
| ribonuclease/angiogenin inhibitor 1 [Mus musculus]                                                   | 2 | -0.0497942 | 0.39828116 |
| ankyrin repeat domain 25 [Mus musculus]                                                              | 2 | -0.1372139 | 3.28385294 |
| tyrosine 3-monooxygenase/tryptophan 5-monooxygenase activation protein, epsilon polypeptide [Mus mu] | 2 | 0.35180281 | 1.02058784 |
| tubulin, beta 4 [Mus musculus]                                                                       | 2 | -0.1110659 | 2.26643512 |
| proteasome (prosome, macropain) subunit, beta type 6 [Mus musculus]                                  | 2 | -0.425919  | 2.01715438 |
| hypothetical protein LOC235043 [Mus musculus]                                                        | 2 | 0.1540577  | 0.07095865 |
| chaperonin subunit 7 (eta) [Mus musculus]                                                            | 2 | 0.31673496 | 1.61420566 |
| squamous cell carcinoma antigen recognized by T-cells 1 [Mus musculus]                               | 2 | 0.13542112 | 0.84086312 |
| phosphoglucomutase 5 [Mus musculus]                                                                  | 2 | -0.7546628 | 0.88176877 |
| histidine triad nucleotide binding protein 1 [Mus musculus]                                          | 2 | 0.08284279 | 2.59811657 |
| heterochromatin protein 1, binding protein 3 [Mus musculus]                                          | 2 | 0.05025095 | 9.43866431 |
| seryl-aminoacyl-tRNA synthetase 1 [Mus musculus]                                                     | 2 | 0.4162492  | 0.19344024 |
| vasodilator-stimulated phosphoprotein [Mus musculus]                                                 | 2 | -0.1928352 | 0.53494279 |
| Rho, GDP dissociation inhibitor (GDI) beta [Mus musculus]                                            | 2 | 1.70312416 | 0.4118446  |
| guanine nucleotide binding protein, alpha inhibiting 3 [Mus musculus]                                | 2 | 0.13011535 | 0.14986369 |
| branched chain aminotransferase 2, mitochondrial [Mus musculus]                                      | 2 | -0.3635366 | 0.12007905 |
| guanosine diphosphate (GDP) dissociation inhibitor 1 [Mus musculus]                                  | 2 | -0.1801441 | 1.03074253 |
| membrane bound C2 domain containing protein [Mus musculus]                                           | 2 | 0.03171042 | 5.95381907 |
| alanyl-tRNA synthetase [Mus musculus]                                                                | 2 | 0.3457489  | 0.71449293 |
| 4-aminobutyrate aminotransferase [Mus musculus]                                                      | 2 | -0.4251906 | 0.10215313 |
| RNA binding motif protein 3 [Mus musculus]                                                           | 2 | -1.4169223 | 0.18383033 |
| electron transferring flavoprotein, beta polypeptide [Mus musculus]                                  | 2 | -0.5170007 | 0.80848721 |
| cell line NK14 derived transforming oncogene [Mus musculus]                                          | 2 | 0.47997037 | 0.38052319 |
| chromodomain helicase DNA binding protein 4 [Mus musculus]                                           | 2 | 0.2020191  | 0.61665412 |
| U5 snRNP-specific protein, 200 kDa [Mus musculus]                                                    | 2 | 0.20793899 | 0.10617209 |
| X-prolyl aminopeptidase (aminopeptidase P) 1, soluble [Mus musculus]                                 | 2 | 0.15316839 | 2.41615764 |
| succinate-Coenzyme A ligase, ADP-forming, beta subunit [Mus musculus]                                | 2 | -0.2554299 | 0.58049578 |
| UDP glucuronosyltransferase 1 family, polypeptide A10 [Mus musculus]                                 | 2 | -0.0574856 | 6.76134837 |
| hypothetical protein LOC74340 [Mus musculus]                                                         | 2 | -0.396705  | 0.43330726 |
| PREDICTED: solute carrier family 25 (mitochondrial carrier, adenine nucleotide translocator), membe  | 2 | -1.5559375 | 0.36503204 |
| PREDICTED: LIM domain only 7 [Mus musculus]                                                          | 2 | 0.18390965 | 2.05116241 |
| neural precursor cell expressed, developmentally down-regulated gene 4 [Mus musculus]                | 2 | 0.40085687 | 0.84093617 |
| septin 11 [Mus musculus]                                                                             | 2 | -0.0474784 | 3.96548331 |
| NADH dehydrogenase (ubiquinone) 1 beta subcomplex, 10 [Mus musculus]                                 | 2 | -0.401703  | 0.28294548 |
| NADH dehydrogenase (ubiquinone) Fe-S protein 3 [Mus musculus]                                        | 2 | 0.27993614 | 2.33776285 |
| protease, serine, 15 [Mus musculus]                                                                  | 2 | -0.0541519 | 1.22820117 |
| cytochrome P450, family 2, subfamily c, polypeptide 65 [Mus musculus]                                | 2 | -0.5172614 | 0.38079059 |
| ATP-binding cassette, sub-family D, member 3 [Mus musculus]                                          | 2 | 0.04136121 | 19.0902213 |
| PREDICTED: RIKEN cDNA E030037J05 gene [Mus musculus]                                                 | 2 | -0.8178116 | 0.61451018 |
| PREDICTED: signal recognition particle 72 [Mus musculus]                                             | 2 | 0.25302769 | 1.45076749 |
| PREDICTED: similar to secreted gel-forming mucin [Mus musculus]                                      | 2 | -0.1311891 | 6.71397633 |
| PREDICTED: cleavage and polyadenylation specific factor 6 [Mus musculus]                             | 2 | 0.33444799 | 2.25915753 |
| PREDICTED: similar to heterogeneous nuclear ribonucleoprotein A0 [Mus musculus]                      | 2 | 0.36118755 | 1.27024214 |
| PREDICTED: p30 DBC protein [Mus musculus]                                                            | 2 | 0.03998638 | 12.6943246 |
| PREDICTED: hypothetical protein XP_619435 [Mus musculus]                                             | 2 | -0.0675368 | 2.28960053 |
| PREDICTED: HECT, UBA and WWE domain containing 1 [Mus musculus]                                      | 2 | 0.4420523  | 0.1182151  |
| ATP-binding cassette, sub-family D, member 1 [Mus musculus]                                          | 1 |            | 0          |
| adaptor protein complex AP-1, sigma 1 [Mus musculus]                                                 | 1 |            | 0          |

|                                                                                       |   |   |
|---------------------------------------------------------------------------------------|---|---|
| carbonic anhydrase 4 [Mus musculus]                                                   | 1 | 0 |
| chaperonin subunit 2 (beta) [Mus musculus]                                            | 1 | 0 |
| creatine kinase, muscle [Mus musculus]                                                | 1 | 0 |
| ribosomal protein S5 [Mus musculus]                                                   | 1 | 0 |
| ribosomal protein S6 kinase polypeptide 1 [Mus musculus]                              | 1 | 0 |
| SEC8 [Mus musculus]                                                                   | 1 | 0 |
| golgi apparatus protein 1 [Mus musculus]                                              | 1 | 0 |
| splicing factor, arginine/serine-rich 5 (SRp40, HRS) [Mus musculus]                   | 1 | 0 |
| solute carrier family 1 (neutral amino acid transporter), member 5 [Mus musculus]     | 1 | 0 |
| autoantigen La [Mus musculus]                                                         | 1 | 0 |
| TAP binding protein [Mus musculus]                                                    | 1 | 0 |
| tight junction protein 1 [Mus musculus]                                               | 1 | 0 |
| ubiquitin specific protease 9, X chromosome [Mus musculus]                            | 1 | 0 |
| alpha thalassemia/mental retardation syndrome X-linked homolog [Mus musculus]         | 1 | 0 |
| myosin IC [Mus musculus]                                                              | 1 | 0 |
| nucleosome assembly protein 1-like 4 [Mus musculus]                                   | 1 | 0 |
| nucleophosmin 1 [Mus musculus]                                                        | 1 | 0 |
| prohibitin [Mus musculus]                                                             | 1 | 0 |
| aminopeptidase puromycin sensitive [Mus musculus]                                     | 1 | 0 |
| protease (prosome, macropain) 26S subunit, ATPase 1 [Mus musculus]                    | 1 | 0 |
| proteasome (prosome, macropain) 26S subunit, ATPase 3 [Mus musculus]                  | 1 | 0 |
| proteasome 26S non-ATPase subunit 4 [Mus musculus]                                    | 1 | 0 |
| prostaglandin-endoperoxide synthase 1 [Mus musculus]                                  | 1 | 0 |
| enolase 3, beta muscle [Mus musculus]                                                 | 1 | 0 |
| aldo-keto reductase family 1, member B8 [Mus musculus]                                | 1 | 0 |
| FK506 binding protein 2 [Mus musculus]                                                | 1 | 0 |
| guanine nucleotide-binding protein, beta-1 subunit [Mus musculus]                     | 1 | 0 |
| glutathione S-transferase, mu 2 [Mus musculus]                                        | 1 | 0 |
| hemoglobin alpha 1 chain [Mus musculus]                                               | 1 | 0 |
| hepatoma-derived growth factor-related protein 2 [Mus musculus]                       | 1 | 0 |
| hydroxysteroid (17-beta) dehydrogenase 2 [Mus musculus]                               | 1 | 0 |
| aldehyde dehydrogenase family 3, subfamily A2 [Mus musculus]                          | 1 | 0 |
| ADP-ribosylation factor 6 [Mus musculus]                                              | 1 | 0 |
| cofilin 1, non-muscle [Mus musculus]                                                  | 1 | 0 |
| procollagen, type V, alpha 2 [Mus musculus]                                           | 1 | 0 |
| catechol-O-methyltransferase [Mus musculus]                                           | 1 | 0 |
| cytochrome c oxidase, subunit Va [Mus musculus]                                       | 1 | 0 |
| cortactin [Mus musculus]                                                              | 1 | 0 |
| 7-dehydrocholesterol reductase [Mus musculus]                                         | 1 | 0 |
| DNA methyltransferase 3A isoform 1 [Mus musculus]                                     | 1 | 0 |
| amine oxidase, copper containing 3 [Mus musculus]                                     | 1 | 0 |
| galactosidase, beta 1 [Mus musculus]                                                  | 1 | 0 |
| caspase 1 [Mus musculus]                                                              | 1 | 0 |
| chaperonin subunit 6a (zeta) [Mus musculus]                                           | 1 | 0 |
| cathepsin D [Mus musculus]                                                            | 1 | 0 |
| defender against cell death 1 [Mus musculus]                                          | 1 | 0 |
| D-dopachrome tautomerase [Mus musculus]                                               | 1 | 0 |
| dolichol-phosphate (beta-D) mannosyltransferase 1 [Mus musculus]                      | 1 | 0 |
| epoxide hydrolase 1, microsomal [Mus musculus]                                        | 1 | 0 |
| FUS interacting protein (serine-arginine rich) 1 [Mus musculus]                       | 1 | 0 |
| X-ray repair complementing defective repair in Chinese hamster cells 6 [Mus musculus] | 1 | 0 |
| guanine nucleotide binding protein, alpha o [Mus musculus]                            | 1 | 0 |
| glutathione S-transferase, theta 2 [Mus musculus]                                     | 1 | 0 |
| hexosaminidase B [Mus musculus]                                                       | 1 | 0 |
| heterogeneous nuclear ribonucleoprotein A/B [Mus musculus]                            | 1 | 0 |
| mitogen activated protein kinase 1 [Mus musculus]                                     | 1 | 0 |
| ATP-binding cassette, sub-family B (MDR/TAP), member 1A [Mus musculus]                | 1 | 0 |
| protein kinase, cAMP dependent, catalytic, beta [Mus musculus]                        | 1 | 0 |
| protein kinase C, delta [Mus musculus]                                                | 1 | 0 |
| reticulocalbin 2 [Mus musculus]                                                       | 1 | 0 |
| ribosomal protein S7 [Mus musculus]                                                   | 1 | 0 |
| secretory carrier membrane protein 3 [Mus musculus]                                   | 1 | 0 |

|                                                                                                                  |   |   |
|------------------------------------------------------------------------------------------------------------------|---|---|
| SWI/SNF related, matrix associated, actin dependent regulator of chromatin, subfamily b, member 1 [Mus musculus] | 1 | 0 |
| U5 small nuclear ribonucleoprotein [Mus musculus]                                                                | 1 | 0 |
| SRY (sex determining region Y)-box 5 [Mus musculus]                                                              | 1 | 0 |
| tuberous sclerosis 2 [Mus musculus]                                                                              | 1 | 0 |
| xanthine dehydrogenase [Mus musculus]                                                                            | 1 | 0 |
| tyrosine 3-monooxygenase/tryptophan 5-monooxygenase activation protein, eta polypeptide [Mus musculus]           | 1 | 0 |
| phosphoribosylglycinamide formyltransferase [Mus musculus]                                                       | 1 | 0 |
| argininosuccinate synthetase [Mus musculus]                                                                      | 1 | 0 |
| annexin A2 [Mus musculus]                                                                                        | 1 | 0 |
| microtubule-associated protein 4 [Mus musculus]                                                                  | 1 | 0 |
| spectrin beta 2 isoform 2 [Mus musculus]                                                                         | 1 | 0 |
| zinc finger protein 162 [Mus musculus]                                                                           | 1 | 0 |
| zinc finger RNA binding protein [Mus musculus]                                                                   | 1 | 0 |
| phosphoenolpyruvate carboxykinase 1, cytosolic [Mus musculus]                                                    | 1 | 0 |
| protease (prosome, macropain) 26S subunit, ATPase 5 [Mus musculus]                                               | 1 | 0 |
| aldo-keto reductase family 1, member C13 [Mus musculus]                                                          | 1 | 0 |
| aldehyde dehydrogenase family 1, subfamily A1 [Mus musculus]                                                     | 1 | 0 |
| annexin A11 [Mus musculus]                                                                                       | 1 | 0 |
| hexokinase 2 [Mus musculus]                                                                                      | 1 | 0 |
| hypoxanthine guanine phosphoribosyl transferase 1 [Mus musculus]                                                 | 1 | 0 |
| heat shock protein 105 [Mus musculus]                                                                            | 1 | 0 |
| platelet-activating factor acetylhydrolase, isoform 1b, beta1 subunit [Mus musculus]                             | 1 | 0 |
| damage specific DNA binding protein 1 [Mus musculus]                                                             | 1 | 0 |
| 5',3'-nucleotidase, cytosolic [Mus musculus]                                                                     | 1 | 0 |
| ATP-binding cassette, subfamily E, member 1 [Mus musculus]                                                       | 1 | 0 |
| ubiquitin-like 1 (sentrin) activating enzyme E1B [Mus musculus]                                                  | 1 | 0 |
| prolactin regulatory element binding protein [Mus musculus]                                                      | 1 | 0 |
| peroxiredoxin 4 [Mus musculus]                                                                                   | 1 | 0 |
| CTP synthase [Mus musculus]                                                                                      | 1 | 0 |
| enoyl coenzyme A hydratase 1, peroxisomal [Mus musculus]                                                         | 1 | 0 |
| myeloid-associated differentiation marker [Mus musculus]                                                         | 1 | 0 |
| pyruvate kinase liver and red blood cell [Mus musculus]                                                          | 1 | 0 |
| eukaryotic translation initiation factor 3, subunit 2 (beta) [Mus musculus]                                      | 1 | 0 |
| DnaJ (Hsp40) homolog, subfamily A, member 2 [Mus musculus]                                                       | 1 | 0 |
| N-acylsphingosine amidohydrolase (acid ceramidase) 1 [Mus musculus]                                              | 1 | 0 |
| heterogeneous nuclear ribonucleoproteins methyltransferase-like 2 [Mus musculus]                                 | 1 | 0 |
| actin related protein 2/3 complex, subunit 3 [Mus musculus]                                                      | 1 | 0 |
| carnitine/acylcarnitine translocase [Mus musculus]                                                               | 1 | 0 |
| developmentally regulated GTP binding protein 2 [Mus musculus]                                                   | 1 | 0 |
| glycoprotein A33 (transmembrane) [Mus musculus]                                                                  | 1 | 0 |
| niban protein [Mus musculus]                                                                                     | 1 | 0 |
| tropomyosin 2, beta [Mus musculus]                                                                               | 1 | 0 |
| arsA (bacterial) arsenite transporter, ATP-binding, homolog 1 [Mus musculus]                                     | 1 | 0 |
| secretory carrier membrane protein 2 [Mus musculus]                                                              | 1 | 0 |
| solute carrier family 29 (nucleoside transporters), member 1 [Mus musculus]                                      | 1 | 0 |
| non-POU-domain-containing, octamer binding protein [Mus musculus]                                                | 1 | 0 |
| stomatin-like protein 2 [Mus musculus]                                                                           | 1 | 0 |
| genes associated with retinoid-IFN-induced mortality 19 [Mus musculus]                                           | 1 | 0 |
| tubulointerstitial nephritis antigen-like [Mus musculus]                                                         | 1 | 0 |
| NADH dehydrogenase (ubiquinone) 1 alpha subcomplex 10 [Mus musculus]                                             | 1 | 0 |
| Der1-like domain family, member 1 [Mus musculus]                                                                 | 1 | 0 |
| meiotic recombination protein REC14 [Mus musculus]                                                               | 1 | 0 |
| lectin, galactose-binding, soluble 2 [Mus musculus]                                                              | 1 | 0 |
| RNA binding motif protein 8a [Mus musculus]                                                                      | 1 | 0 |
| proteasome 26S non-ATPase subunit 12 [Mus musculus]                                                              | 1 | 0 |
| transmembrane emp24 protein transport domain containing 9 [Mus musculus]                                         | 1 | 0 |
| microfibrillar-associated protein 1 [Mus musculus]                                                               | 1 | 0 |
| small nuclear ribonucleoprotein polypeptide G [Mus musculus]                                                     | 1 | 0 |
| hypothetical protein LOC68226 [Mus musculus]                                                                     | 1 | 0 |
| nucleolar protein family A, member 2 [Mus musculus]                                                              | 1 | 0 |
| phosphoribosyl pyrophosphate synthetase 2 [Mus musculus]                                                         | 1 | 0 |
| tissue specific transplantation antigen P35B [Mus musculus]                                                      | 1 | 0 |

|                                                                                                 |   |   |
|-------------------------------------------------------------------------------------------------|---|---|
| protein phosphatase 1, catalytic subunit, alpha [Mus musculus]                                  | 1 | 0 |
| splicing factor 3b, subunit 1 [Mus musculus]                                                    | 1 | 0 |
| fatty acid binding protein 4, adipocyte [Mus musculus]                                          | 1 | 0 |
| methyl CpG binding protein 2 [Mus musculus]                                                     | 1 | 0 |
| Williams-Beuren syndrome chromosome region 1 homolog [Mus musculus]                             | 1 | 0 |
| sideroflexin 3 [Mus musculus]                                                                   | 1 | 0 |
| hemoglobin, beta adult minor chain [Mus musculus]                                               | 1 | 0 |
| acetyl-CoA synthetase 2-like [Mus musculus]                                                     | 1 | 0 |
| acetyl-Coenzyme A acyltransferase 1 [Mus musculus]                                              | 1 | 0 |
| thioredoxin domain containing 4 [Mus musculus]                                                  | 1 | 0 |
| NADH dehydrogenase (ubiquinone) flavoprotein 1 [Mus musculus]                                   | 1 | 0 |
| sulfotransferase family 1A, phenol-preferring, member 1 [Mus musculus]                          | 1 | 0 |
| U2 small nuclear ribonucleoprotein auxiliary factor (U2AF) 2 [Mus musculus]                     | 1 | 0 |
| vacuolar protein sorting 26 [Mus musculus]                                                      | 1 | 0 |
| heterogeneous nuclear ribonucleoprotein F [Mus musculus]                                        | 1 | 0 |
| chromosome condensation 1 [Mus musculus]                                                        | 1 | 0 |
| DEAD (Asp-Glu-Ala-Asp) box polypeptide 1 [Mus musculus]                                         | 1 | 0 |
| aldo-keto reductase family 1, member C14 [Mus musculus]                                         | 1 | 0 |
| OTU domain, ubiquitin aldehyde binding 1 [Mus musculus]                                         | 1 | 0 |
| ATPase, H+ transporting, V1 subunit B, isoform 2 [Mus musculus]                                 | 1 | 0 |
| glycoprotein, synaptic 2 [Mus musculus]                                                         | 1 | 0 |
| RD RNA-binding protein [Mus musculus]                                                           | 1 | 0 |
| methylenetetrahydrofolate dehydrogenase 1 [Mus musculus]                                        | 1 | 0 |
| ret finger protein-like 4 [Mus musculus]                                                        | 1 | 0 |
| sec13-like protein [Mus musculus]                                                               | 1 | 0 |
| hypothetical protein LOC52690 [Mus musculus]                                                    | 1 | 0 |
| glucosaminyl (N-acetyl) transferase 3, mucin type [Mus musculus]                                | 1 | 0 |
| calponin 3, acidic [Mus musculus]                                                               | 1 | 0 |
| solute carrier family 25 (mitochondrial carrier oxoglutarate carrier), member 11 [Mus musculus] | 1 | 0 |
| glutathione S-transferase class kappa [Mus musculus]                                            | 1 | 0 |
| BAI1-associated protein 2-like 1 [Mus musculus]                                                 | 1 | 0 |
| electron transferring flavoprotein, dehydrogenase [Mus musculus]                                | 1 | 0 |
| Sec11-like 3 [Mus musculus]                                                                     | 1 | 0 |
| RIKEN cDNA 2310001A20 [Mus musculus]                                                            | 1 | 0 |
| biliverdin reductase B (flavin reductase (NADPH)) [Mus musculus]                                | 1 | 0 |
| hypothetical protein LOC234564 [Mus musculus]                                                   | 1 | 0 |
| amyloid beta precursor protein binding protein 1 [Mus musculus]                                 | 1 | 0 |
| eukaryotic translation initiation factor 4A1 [Mus musculus]                                     | 1 | 0 |
| mitogen activated protein kinase 3 [Mus musculus]                                               | 1 | 0 |
| glutathione S-transferase, theta 3 [Mus musculus]                                               | 1 | 0 |
| hydroxyacyl glutathione hydrolase [Mus musculus]                                                | 1 | 0 |
| zinc finger and BTB domain containing 8 opposite strand [Mus musculus]                          | 1 | 0 |
| cystathionase [Mus musculus]                                                                    | 1 | 0 |
| transcription factor B1, mitochondrial [Mus musculus]                                           | 1 | 0 |
| mitochondrial ribosomal protein L37 [Mus musculus]                                              | 1 | 0 |
| oncoprotein induced transcript 1 [Mus musculus]                                                 | 1 | 0 |
| eukaryotic translation initiation factor 3, subunit 8 [Mus musculus]                            | 1 | 0 |
| sporulation-induced transcript 4-associated protein [Mus musculus]                              | 1 | 0 |
| vesicle docking protein [Mus musculus]                                                          | 1 | 0 |
| adenylate kinase 3 [Mus musculus]                                                               | 1 | 0 |
| aldehyde dehydrogenase 16 family, member A1 [Mus musculus]                                      | 1 | 0 |
| ER-resident protein ERdj5 [Mus musculus]                                                        | 1 | 0 |
| phosphoinositol 3-phosphate-binding protein-2 [Mus musculus]                                    | 1 | 0 |
| 13kDa differentiation-associated protein [Mus musculus]                                         | 1 | 0 |
| chitinase, di-N-acetyl- [Mus musculus]                                                          | 1 | 0 |
| RIKEN cDNA D230014K01 [Mus musculus]                                                            | 1 | 0 |
| translocase of outer mitochondrial membrane 70 homolog A [Mus musculus]                         | 1 | 0 |
| eukaryotic translation elongation factor 1 gamma [Mus musculus]                                 | 1 | 0 |
| proteasome 26S ATPase subunit 6 [Mus musculus]                                                  | 1 | 0 |
| phospholipase A2, activating protein [Mus musculus]                                             | 1 | 0 |
| NCK-associated protein 1 [Mus musculus]                                                         | 1 | 0 |
| GTPase, IMAP family member 4 isoform a [Mus musculus]                                           | 1 | 0 |

|                                                                            |   |   |
|----------------------------------------------------------------------------|---|---|
| PREDICTED: RIKEN cDNA 5830467P10 gene [Mus musculus]                       | 1 | 0 |
| sorting nexin 9 [Mus musculus]                                             | 1 | 0 |
| isoleucine-tRNA synthetase [Mus musculus]                                  | 1 | 0 |
| hypothetical protein LOC69091 [Mus musculus]                               | 1 | 0 |
| breast carcinoma amplified sequence 1 [Mus musculus]                       | 1 | 0 |
| SEC24 related gene family, member A [Mus musculus]                         | 1 | 0 |
| RIKEN cDNA 5730439E10 [Mus musculus]                                       | 1 | 0 |
| hypothetical protein LOC238880 [Mus musculus]                              | 1 | 0 |
| hypothetical protein LOC94184 [Mus musculus]                               | 1 | 0 |
| protein disulfide isomerase-associated 5 [Mus musculus]                    | 1 | 0 |
| hypothetical protein LOC70950 [Mus musculus]                               | 1 | 0 |
| ADP-ribosylation factor GTPase activating protein 3 [Mus musculus]         | 1 | 0 |
| fucosidase, alpha-L- 2, plasma [Mus musculus]                              | 1 | 0 |
| hypothetical protein LOC237465 [Mus musculus]                              | 1 | 0 |
| arginine-tRNA-protein transferase 1 [Mus musculus]                         | 1 | 0 |
| coronin, actin binding protein 1C [Mus musculus]                           | 1 | 0 |
| golgi associated PDZ and coiled-coil motif containing [Mus musculus]       | 1 | 0 |
| arginine/serine-rich splicing factor 6 [Mus musculus]                      | 1 | 0 |
| transcription elongation factor B (SIII), polypeptide 3 [Mus musculus]     | 1 | 0 |
| ubiquitin-conjugating enzyme E2 variant 2 [Mus musculus]                   | 1 | 0 |
| very-long-chain acyl-CoA dehydrogenase VLCAD homolog [Mus musculus]        | 1 | 0 |
| mitochondrial Rho 1 [Mus musculus]                                         | 1 | 0 |
| v-crk sarcoma virus CT10 oncogene homolog [Mus musculus]                   | 1 | 0 |
| ubiquitin specific protease 14 [Mus musculus]                              | 1 | 0 |
| fucosyltransferase 8 [Mus musculus]                                        | 1 | 0 |
| cathepsin C preproprotein [Mus musculus]                                   | 1 | 0 |
| N-acetyl galactosaminidase, alpha [Mus musculus]                           | 1 | 0 |
| H1 histone family, member 0 [Mus musculus]                                 | 1 | 0 |
| 1-acylglycerol-3-phosphate O-acyltransferase 1 [Mus musculus]              | 1 | 0 |
| golgi reassembly stacking protein 2 [Mus musculus]                         | 1 | 0 |
| methylcrotonoyl-Coenzyme A carboxylase 1 (alpha) [Mus musculus]            | 1 | 0 |
| superoxide dismutase 2, mitochondrial [Mus musculus]                       | 1 | 0 |
| solute carrier family 39 (metal ion transporter), member 11 [Mus musculus] | 1 | 0 |
| hydroxyacid oxidase (glycolate oxidase) 3 [Mus musculus]                   | 1 | 0 |
| methionine sulfoxide reductase A [Mus musculus]                            | 1 | 0 |
| nuclear prelamin A recognition factor-like [Mus musculus]                  | 1 | 0 |
| implantation-associated protein [Mus musculus]                             | 1 | 0 |
| leucine aminopeptidase 3 [Mus musculus]                                    | 1 | 0 |
| glyoxalase 1 [Mus musculus]                                                | 1 | 0 |
| annexin A6 [Mus musculus]                                                  | 1 | 0 |
| proteasome (prosome, macropain) subunit, beta type 2 [Mus musculus]        | 1 | 0 |
| glycerol-3-phosphate dehydrogenase 2 [Mus musculus]                        | 1 | 0 |
| murinoglobulin 1 [Mus musculus]                                            | 1 | 0 |
| integrin alpha 6 [Mus musculus]                                            | 1 | 0 |
| hydroxysteroid (17-beta) dehydrogenase 4 [Mus musculus]                    | 1 | 0 |
| Golgi autoantigen, golgin subfamily a, 3 [Mus musculus]                    | 1 | 0 |
| NAD(P) dependent steroid dehydrogenase-like [Mus musculus]                 | 1 | 0 |
| dihydrolipoamide dehydrogenase [Mus musculus]                              | 1 | 0 |
| latent transforming growth factor beta binding protein 4 [Mus musculus]    | 1 | 0 |
| HLA-B-associated transcript 3 [Mus musculus]                               | 1 | 0 |
| RCC1-like [Mus musculus]                                                   | 1 | 0 |
| asparagine synthetase [Mus musculus]                                       | 1 | 0 |
| keratin complex 2, basic, gene 16 [Mus musculus]                           | 1 | 0 |
| pleckstrin homology domain containing, family A member 6 [Mus musculus]    | 1 | 0 |
| heterogeneous nuclear ribonucleoprotein L-like [Mus musculus]              | 1 | 0 |
| structure specific recognition protein 1 [Mus musculus]                    | 1 | 0 |
| tubulin, beta 2 [Mus musculus]                                             | 1 | 0 |
| caspase 8 [Mus musculus]                                                   | 1 | 0 |
| protein phosphatase 5, catalytic subunit [Mus musculus]                    | 1 | 0 |
| proteasome (prosome, macropain) 26S subunit, ATPase 2 [Mus musculus]       | 1 | 0 |
| transaldolase 1 [Mus musculus]                                             | 1 | 0 |
| RAS related protein 1b [Mus musculus]                                      | 1 | 0 |

|                                                                                                        |   |   |
|--------------------------------------------------------------------------------------------------------|---|---|
| fibrinogen, B beta polypeptide [Mus musculus]                                                          | 1 | 0 |
| procollagen, type I, alpha 1 [Mus musculus]                                                            | 1 | 0 |
| host cell factor C1 [Mus musculus]                                                                     | 1 | 0 |
| lectin, mannose-binding 2 [Mus musculus]                                                               | 1 | 0 |
| glycerol-3-phosphate dehydrogenase 1-like [Mus musculus]                                               | 1 | 0 |
| chondroitin sulfate proteoglycan 6 [Mus musculus]                                                      | 1 | 0 |
| ATPase, Ca <sup>++</sup> transporting, fast twitch 1 [Mus musculus]                                    | 1 | 0 |
| guanine nucleotide binding protein, alpha q polypeptide [Mus musculus]                                 | 1 | 0 |
| PREDICTED: palladin [Mus musculus]                                                                     | 1 | 0 |
| PREDICTED: oxidative-stress responsive 1 [Mus musculus]                                                | 1 | 0 |
| PREDICTED: protein phosphatase 1, regulatory (inhibitor) subunit 12A [Mus musculus]                    | 1 | 0 |
| ring finger (C3HC4 type) and KH domain containing 1 [Mus musculus]                                     | 1 | 0 |
| DEAD (Asp-Glu-Ala-Asp) box polypeptide 39 [Mus musculus]                                               | 1 | 0 |
| Rab6 interacting protein 1 [Mus musculus]                                                              | 1 | 0 |
| A kinase (PRKA) anchor protein (yotiao) 9 [Mus musculus]                                               | 1 | 0 |
| heat shock 70kDa protein 4 like [Mus musculus]                                                         | 1 | 0 |
| guanine nucleotide binding protein, alpha 13 [Mus musculus]                                            | 1 | 0 |
| echinoderm microtubule associated protein like 4 [Mus musculus]                                        | 1 | 0 |
| H2A histone family, member Y [Mus musculus]                                                            | 1 | 0 |
| PDZ and LIM domain 7 [Mus musculus]                                                                    | 1 | 0 |
| I-kappa-B-related protein [Mus musculus]                                                               | 1 | 0 |
| NADH dehydrogenase (ubiquinone) Fe-S protein 8 [Mus musculus]                                          | 1 | 0 |
| CDW92 antigen [Mus musculus]                                                                           | 1 | 0 |
| fibronectin 1 [Mus musculus]                                                                           | 1 | 0 |
| SAM domain- and HD domain-containing protein 1 [Mus musculus]                                          | 1 | 0 |
| early endosome antigen 1 [Mus musculus]                                                                | 1 | 0 |
| eukaryotic translation initiation factor 3 subunit 6 interacting protein [Mus musculus]                | 1 | 0 |
| PREDICTED: similar to GMP synthase [glutamine-hydrolyzing] (Glutamine amidotransferase) (GMP synthase) | 1 | 0 |
| PREDICTED: plasma membrane calcium ATPase 1 [Mus musculus]                                             | 1 | 0 |
| PREDICTED: phosphoribosyl pyrophosphate synthetase-associated protein 1 [Mus musculus]                 | 1 | 0 |
| PREDICTED: similar to mKIAA0177 protein [Mus musculus]                                                 | 1 | 0 |
| PREDICTED: AFG3(ATPase family gene 3)-like 2 [Mus musculus]                                            | 1 | 0 |
| PREDICTED: GCN1 general control of amino-acid synthesis 1-like 1 [Mus musculus]                        | 1 | 0 |
| succinate-Coenzyme A ligase, GDP-forming, beta subunit [Mus musculus]                                  | 1 | 0 |
| DJ-1 protein [Mus musculus]                                                                            | 1 | 0 |
| glutaminyI-tRNA synthetase [Mus musculus]                                                              | 1 | 0 |
| WD repeat domain 22 [Mus musculus]                                                                     | 1 | 0 |
| PREDICTED: similar to mKIAA1741 protein [Mus musculus]                                                 | 1 | 0 |
| PREDICTED: activity-dependent neuroprotective protein [Mus musculus]                                   | 1 | 0 |
| PREDICTED: mucin 2 [Mus musculus]                                                                      | 1 | 0 |
| PREDICTED: similar to heterogeneous nuclear ribonucleoprotein H3 isoform a [Mus musculus]              | 1 | 0 |
| PREDICTED: similar to E330039G21Rik protein [Mus musculus]                                             | 1 | 0 |
| PREDICTED: similar to heterogeneous nuclear ribonucleoprotein A3 [Mus musculus]                        | 1 | 0 |
| PREDICTED: phosphoribosylformylglycinamide synthase (FGAR amidotransferase) [Mus musculus]             | 1 | 0 |
| PREDICTED: hypothetical protein XP_621309 [Mus musculus]                                               | 1 | 0 |
| PREDICTED: DEAD box polypeptide 46 [Mus musculus]                                                      | 1 | 0 |
| PREDICTED: hypothetical protein LOC219189 [Mus musculus]                                               | 1 | 0 |
| adaptor protein complex AP-1, beta 1 subunit [Mus musculus]                                            | 0 |   |
| adaptor-related protein complex AP-1, mu subunit 1 [Mus musculus]                                      | 0 |   |
| radixin [Mus musculus]                                                                                 | 0 |   |
| Harvey rat sarcoma oncogene, subgroup R [Mus musculus]                                                 | 0 |   |
| serine (or cysteine) proteinase inhibitor, clade B, member 5 [Mus musculus]                            | 0 |   |
| syntaxin 4A (placental) [Mus musculus]                                                                 | 0 |   |
| surfeit gene 6 [Mus musculus]                                                                          | 0 |   |
| tripeptidyl peptidase II [Mus musculus]                                                                | 0 |   |
| protease, serine, 2 [Mus musculus]                                                                     | 0 |   |
| keratin complex 2, basic, gene 1 [Mus musculus]                                                        | 0 |   |
| mannosidase 2, alpha 1 [Mus musculus]                                                                  | 0 |   |
| minichromosome maintenance protein 6 [Mus musculus]                                                    | 0 |   |
| matrix metalloproteinase 12 [Mus musculus]                                                             | 0 |   |
| malic enzyme, supernatant [Mus musculus]                                                               | 0 |   |
| nidogen 2 [Mus musculus]                                                                               | 0 |   |

|                                                                             |   |
|-----------------------------------------------------------------------------|---|
| nucleobindin 1 [Mus musculus]                                               | 0 |
| ornithine transcarbamylase [Mus musculus]                                   | 0 |
| P450 (cytochrome) oxidoreductase [Mus musculus]                             | 0 |
| RAB11B, member RAS oncogene family [Mus musculus]                           | 0 |
| RAD23b homolog [Mus musculus]                                               | 0 |
| fatty acid binding protein 2, intestinal [Mus musculus]                     | 0 |
| fibrillin 1 [Mus musculus]                                                  | 0 |
| flotillin 1 [Mus musculus]                                                  | 0 |
| histone deacetylase 1 [Mus musculus]                                        | 0 |
| integral membrane protein 2B [Mus musculus]                                 | 0 |
| ADP-ribosylation factor 4 [Mus musculus]                                    | 0 |
| chromogranin B [Mus musculus]                                               | 0 |
| procollagen, type I, alpha 2 [Mus musculus]                                 | 0 |
| cytochrome P450, family 3, subfamily a, polypeptide 13 [Mus musculus]       | 0 |
| DEAD (Asp-Glu-Ala-Asp) box polypeptide 5 [Mus musculus]                     | 0 |
| adaptor-related protein complex 3, beta 1 subunit [Mus musculus]            | 0 |
| FK506 binding protein 4 [Mus musculus]                                      | 0 |
| guanine nucleotide binding protein, alpha 11 [Mus musculus]                 | 0 |
| integrin linked kinase [Mus musculus]                                       | 0 |
| NIMA (never in mitosis gene a)-related expressed kinase 4 [Mus musculus]    | 0 |
| nitrilase 1 [Mus musculus]                                                  | 0 |
| 3'-phosphoadenosine 5'-phosphosulfate synthase 1 [Mus musculus]             | 0 |
| poly(rC) binding protein 1 [Mus musculus]                                   | 0 |
| protein kinase C, alpha [Mus musculus]                                      | 0 |
| prolyl endopeptidase [Mus musculus]                                         | 0 |
| protein kinase, cGMP-dependent, type I beta isoform [Mus musculus]          | 0 |
| syntaxin binding protein 3 [Mus musculus]                                   | 0 |
| upstream binding transcription factor, RNA polymerase I [Mus musculus]      | 0 |
| thrombospondin 4 [Mus musculus]                                             | 0 |
| zyxin [Mus musculus]                                                        | 0 |
| aldehyde dehydrogenase family 1, subfamily A7 [Mus musculus]                | 0 |
| transcriptional regulator, SIN3A [Mus musculus]                             | 0 |
| synaptogyrin 2 [Mus musculus]                                               | 0 |
| RAS p21 protein activator 3 [Mus musculus]                                  | 0 |
| proliferating cell nuclear antigen [Mus musculus]                           | 0 |
| cytoplasmic FMR1 interacting protein 1 [Mus musculus]                       | 0 |
| androgen receptor [Mus musculus]                                            | 0 |
| desmocollin 2 [Mus musculus]                                                | 0 |
| erythrocyte protein band 4.1-like 3 [Mus musculus]                          | 0 |
| hemopoietic cell phosphatase [Mus musculus]                                 | 0 |
| heat shock protein 1-like [Mus musculus]                                    | 0 |
| N-myc downstream regulated gene 2 [Mus musculus]                            | 0 |
| t-complex protein 1 [Mus musculus]                                          | 0 |
| tight junction protein 3 [Mus musculus]                                     | 0 |
| cullin 1 [Mus musculus]                                                     | 0 |
| ERO1-like [Mus musculus]                                                    | 0 |
| kinesin family member 21A [Mus musculus]                                    | 0 |
| clathrin, light polypeptide (Lca) [Mus musculus]                            | 0 |
| alpha isoform of regulatory subunit A, protein phosphatase 2 [Mus musculus] | 0 |
| semaF cytoplasmic domain associated protein 2 [Mus musculus]                | 0 |
| coatamer protein complex, subunit gamma 2 [Mus musculus]                    | 0 |
| eukaryotic translation initiation factor 3, subunit 7 (zeta) [Mus musculus] | 0 |
| phosphatidylethanolamine binding protein [Mus musculus]                     | 0 |
| poly(A) binding protein, nuclear 1 [Mus musculus]                           | 0 |
| methionine aminopeptidase 2 [Mus musculus]                                  | 0 |
| BRG1/brm-associated factor 53A [Mus musculus]                               | 0 |
| diaphanous homolog 3 [Mus musculus]                                         | 0 |
| isovaleryl coenzyme A dehydrogenase [Mus musculus]                          | 0 |
| plakophilin 3 [Mus musculus]                                                | 0 |
| SMC1 structural maintenance of chromosomes 1-like 1 [Mus musculus]          | 0 |
| aldehyde dehydrogenase 9, subfamily A1 [Mus musculus]                       | 0 |
| Sec11-like 1 [Mus musculus]                                                 | 0 |



|                                                                                            |   |
|--------------------------------------------------------------------------------------------|---|
| solute carrier family 26, member 3 [Mus musculus]                                          | 0 |
| melanoma cell adhesion molecule [Mus musculus]                                             | 0 |
| aspartyl beta-hydroxylase [Mus musculus]                                                   | 0 |
| nuclear protein E3-3 [Mus musculus]                                                        | 0 |
| seryl-aminoacyl-tRNA synthetase 2 [Mus musculus]                                           | 0 |
| harmonin isoform a1 [Mus musculus]                                                         | 0 |
| Ly1 antibody reactive clone [Mus musculus]                                                 | 0 |
| nuclear receptor-binding factor 1 [Mus musculus]                                           | 0 |
| hypothetical protein LOC66289 [Mus musculus]                                               | 0 |
| RIKEN cDNA 2210417D09 [Mus musculus]                                                       | 0 |
| nipsnap homolog 3A [Mus musculus]                                                          | 0 |
| cytochrome b-5 [Mus musculus]                                                              | 0 |
| hypothetical protein LOC66857 [Mus musculus]                                               | 0 |
| phosphoribosylaminoimidazole carboxylase [Mus musculus]                                    | 0 |
| NADH dehydrogenase (ubiquinone) 1 beta subcomplex 8 [Mus musculus]                         | 0 |
| SAC1 (suppressor of actin mutations 1, homolog)-like [Mus musculus]                        | 0 |
| tenascin XB [Mus musculus]                                                                 | 0 |
| guanine nucleotide-binding protein, beta-2 subunit [Mus musculus]                          | 0 |
| seminal vesicle antigen-like 1 [Mus musculus]                                              | 0 |
| RAB3D, member RAS oncogene family [Mus musculus]                                           | 0 |
| carnitine deficiency-associated gene expressed in ventricle 1 [Mus musculus]               | 0 |
| nucleolar and coiled-body phosphoprotein 1 [Mus musculus]                                  | 0 |
| forkhead box P1 [Mus musculus]                                                             | 0 |
| regulating synaptic membrane exocytosis 2 [Mus musculus]                                   | 0 |
| glutathione peroxidase 2 [Mus musculus]                                                    | 0 |
| serine (or cysteine) proteinase inhibitor, clade C (antithrombin), member 1 [Mus musculus] | 0 |
| oxidation resistance 1 [Mus musculus]                                                      | 0 |
| myotubularin related protein 4 [Mus musculus]                                              | 0 |
| peroxisomal acyl-CoA thioesterase 1 [Mus musculus]                                         | 0 |
| fuse-binding protein-interacting repressor [Mus musculus]                                  | 0 |
| hypothetical protein LOC70984 [Mus musculus]                                               | 0 |
| WD repeat domain 23 [Mus musculus]                                                         | 0 |
| argininosuccinate lyase [Mus musculus]                                                     | 0 |
| carboxylesterase 6 [Mus musculus]                                                          | 0 |
| adenosine kinase [Mus musculus]                                                            | 0 |
| NADH dehydrogenase (ubiquinone) Fe-S protein 5 [Mus musculus]                              | 0 |
| arginyl-tRNA synthetase [Mus musculus]                                                     | 0 |
| aldehyde dehydrogenase family 7, member A1 [Mus musculus]                                  | 0 |
| oxidized low density lipoprotein (lectin-like) receptor 1 [Mus musculus]                   | 0 |
| pre-mRNA processing factor 8 [Mus musculus]                                                | 0 |
| PDZ-domain protein scribble [Mus musculus]                                                 | 0 |
| PREDICTED: similar to fatty acid desaturase 2 [Mus musculus]                               | 0 |
| cytochrome P450, family 2, subfamily s, polypeptide 1 [Mus musculus]                       | 0 |
| hypothetical protein LOC69824 [Mus musculus]                                               | 0 |
| hypothetical protein LOC71998 [Mus musculus]                                               | 0 |
| transcription elongation factor B (SIII), polypeptide 1 [Mus musculus]                     | 0 |
| hypothetical protein LOC67201 [Mus musculus]                                               | 0 |
| eukaryotic translation initiation factor 3, subunit 5 (epsilon) [Mus musculus]             | 0 |
| ribosomal protein S11 [Mus musculus]                                                       | 0 |
| cysteine sulfinic acid decarboxylase [Mus musculus]                                        | 0 |
| hypothetical protein LOC28088 [Mus musculus]                                               | 0 |
| zinc finger CCCH type, antiviral 1 [Mus musculus]                                          | 0 |
| pleckstrin homology domain containing, family C (with FERM domain) member 1 [Mus musculus] | 0 |
| sorbitol dehydrogenase 1 [Mus musculus]                                                    | 0 |
| forkhead box N4 [Mus musculus]                                                             | 0 |
| ribosomal protein S6 kinase polypeptide 3 [Mus musculus]                                   | 0 |
| microtubule associated monooxygenase, calponin and LIM domain containing 3 [Mus musculus]  | 0 |
| PREDICTED: similar to UDP-N-acetylglucosamine pyrophosphorylase 1-like 1 [Mus musculus]    | 0 |
| SGT1, suppressor of G2 allele of SKP1 [Mus musculus]                                       | 0 |
| ribosomal protein S27 [Mus musculus]                                                       | 0 |
| Rho GTPase activating protein 12 [Mus musculus]                                            | 0 |
| nucleoporin 133 [Mus musculus]                                                             | 0 |

|                                                                                                    |   |
|----------------------------------------------------------------------------------------------------|---|
| nodal modulator 1 [Mus musculus]                                                                   | 0 |
| hypothetical protein LOC71664 [Mus musculus]                                                       | 0 |
| leiomodlin 1 (smooth muscle) [Mus musculus]                                                        | 0 |
| solute carrier family 25 (mitochondrial carrier, Aralar), member 12 [Mus musculus]                 | 0 |
| rhomoid-like protein 6 [Mus musculus]                                                              | 0 |
| amine oxidase (flavin-containing) [Mus musculus]                                                   | 0 |
| hypothetical protein LOC240960 [Mus musculus]                                                      | 0 |
| translocated promoter region protein [Mus musculus]                                                | 0 |
| v-raf murine sarcoma 3611 viral oncogene homolog [Mus musculus]                                    | 0 |
| tryptophan hydroxylase 2 [Mus musculus]                                                            | 0 |
| hypothetical protein LOC216821 [Mus musculus]                                                      | 0 |
| tubulin, beta 6 [Mus musculus]                                                                     | 0 |
| ATP-binding cassette, sub-family A (ABC1), member 3 [Mus musculus]                                 | 0 |
| cullin 5 [Mus musculus]                                                                            | 0 |
| protein phosphatase 1, catalytic subunit, beta [Mus musculus]                                      | 0 |
| PREDICTED: nuclear protein in the AT region [Mus musculus]                                         | 0 |
| aldose 1-epimerase [Mus musculus]                                                                  | 0 |
| hypothetical protein LOC211936 [Mus musculus]                                                      | 0 |
| 1-beta dynein [Mus musculus]                                                                       | 0 |
| zinc finger protein 281 [Mus musculus]                                                             | 0 |
| hypothetical protein 4732456N10 [Mus musculus]                                                     | 0 |
| nuclear mitotic apparatus protein 1 [Mus musculus]                                                 | 0 |
| minichromosome maintenance protein 10 [Mus musculus]                                               | 0 |
| centrosomal colon cancer autoantigen [Mus musculus]                                                | 0 |
| elongation factor Tu GTP binding domain containing 1 [Mus musculus]                                | 0 |
| nicotinamide nucleotide adenylyltransferase 2 [Mus musculus]                                       | 0 |
| proteasome 26S non-ATPase subunit 11 [Mus musculus]                                                | 0 |
| bleomycin hydrolase [Mus musculus]                                                                 | 0 |
| putative lysophosphatidic acid acyltransferase [Mus musculus]                                      | 0 |
| hypothetical protein LOC106755 [Mus musculus]                                                      | 0 |
| hypothetical protein LOC71946 [Mus musculus]                                                       | 0 |
| myosin regulatory light chain interacting protein [Mus musculus]                                   | 0 |
| L-specific multifunctional beta-oxidation protein [Mus musculus]                                   | 0 |
| hypothetical protein LOC67873 [Mus musculus]                                                       | 0 |
| transmembrane 9 superfamily protein member 4 [Mus musculus]                                        | 0 |
| adducin 3 (gamma) [Mus musculus]                                                                   | 0 |
| casein kinase II, alpha 1 polypeptide [Mus musculus]                                               | 0 |
| UDP-N-acetyl-alpha-D-galactosamine: polypeptide N-acetylgalactosaminyltransferase 7 [Mus musculus] | 0 |
| guanine nucleotide binding protein, alpha 14 [Mus musculus]                                        | 0 |
| huntingtin interacting protein 2 [Mus musculus]                                                    | 0 |
| N-ethylmaleimide sensitive fusion protein [Mus musculus]                                           | 0 |
| 3-monooxygenase/tryptophan 5-monooxygenase activation protein, gamma polypeptide [Mus musculus]    | 0 |
| hypothetical protein LOC68303 [Mus musculus]                                                       | 0 |
| budding uninhibited by benzimidazoles 3 homolog [Mus musculus]                                     | 0 |
| hepatoma-derived growth factor [Mus musculus]                                                      | 0 |
| rhopilin, Rho GTPase binding protein 2 [Mus musculus]                                              | 0 |
| RAB25, member RAS oncogene family [Mus musculus]                                                   | 0 |
| ubiquitin specific protease 8 [Mus musculus]                                                       | 0 |
| EF hand domain containing 2 [Mus musculus]                                                         | 0 |
| dodecenoyl-Coenzyme A delta isomerase (3,2 trans-enoyl-Coenzyme A isomerase) [Mus musculus]        | 0 |
| HGF-regulated tyrosine kinase substrate [Mus musculus]                                             | 0 |
| signal sequence receptor, alpha [Mus musculus]                                                     | 0 |
| MYB binding protein (P160) 1a [Mus musculus]                                                       | 0 |
| CDP-diacylglycerol synthase 1 [Mus musculus]                                                       | 0 |
| glutamic pyruvic transaminase 1, soluble [Mus musculus]                                            | 0 |
| capping protein (actin filament) muscle Z-line, alpha 1 [Mus musculus]                             | 0 |
| nicalin homolog [Mus musculus]                                                                     | 0 |
| myosin heavy chain 10, non-muscle [Mus musculus]                                                   | 0 |
| protein kinase C binding protein 1 [Mus musculus]                                                  | 0 |
| RAB21, member RAS oncogene family [Mus musculus]                                                   | 0 |
| IGF-II mRNA-binding protein 2 [Mus musculus]                                                       | 0 |
| lymphoid-restricted membrane protein [Mus musculus]                                                | 0 |

|                                                                                                       |   |
|-------------------------------------------------------------------------------------------------------|---|
| aldehyde dehydrogenase 4 family, member A1 [Mus musculus]                                             | 0 |
| hypothetical protein LOC75089 [Mus musculus]                                                          | 0 |
| hemopoietic cell kinase isoform p59Hck [Mus musculus]                                                 | 0 |
| RIKEN cDNA G430041M01 [Mus musculus]                                                                  | 0 |
| slingshot-like 3 [Mus musculus]                                                                       | 0 |
| abl-interactor 2 [Mus musculus]                                                                       | 0 |
| PREDICTED: RIKEN cDNA A230046K03 gene [Mus musculus]                                                  | 0 |
| ATP-binding cassette, sub-family F (GCN20), member 1 [Mus musculus]                                   | 0 |
| hypothetical protein LOC215112 [Mus musculus]                                                         | 0 |
| GLI-Kruppel family member HKR1 [Mus musculus]                                                         | 0 |
| core 1 UDP-galactose:N-acetylgalactosamine-alpha-R beta 1,3-galactosyltransferase [Mus musculus]      | 0 |
| nuclear protein localization 4 [Mus musculus]                                                         | 0 |
| TPX2, microtubule-associated protein homolog [Mus musculus]                                           | 0 |
| desmuslin isoform H [Mus musculus]                                                                    | 0 |
| sulfotransferase family 1D, member 1 [Mus musculus]                                                   | 0 |
| methylthioadenosine phosphorylase [Mus musculus]                                                      | 0 |
| proteasome beta 4 subunit [Mus musculus]                                                              | 0 |
| laminin, alpha 4 [Mus musculus]                                                                       | 0 |
| desmuslin isoform M [Mus musculus]                                                                    | 0 |
| hepatic nuclear factor 4, alpha [Mus musculus]                                                        | 0 |
| hypothetical protein LOC99382 [Mus musculus]                                                          | 0 |
| eukaryotic translation initiation factor 4 gamma, 3 [Mus musculus]                                    | 0 |
| Try10-like trypsinogen [Mus musculus]                                                                 | 0 |
| pleckstrin and Sec7 domain containing homolog [Mus musculus]                                          | 0 |
| PREDICTED: similar to Keratin, type 1 cytoskeletal 18 (Cytokeratin 18) (K18) (CK 18) [Homo sapiens]   | 0 |
| PREDICTED: similar to FLJ44691 protein [Mus musculus]                                                 | 0 |
| PREDICTED: histidine triad nucleotide binding protein 2 [Mus musculus]                                | 0 |
| PREDICTED: similar to 80 kDa nuclear cap binding protein (NCBP 80 kDa subunit) (CBP80) [Mus musculus] | 0 |
| PREDICTED: hypothetical protein LOC76224 [Mus musculus]                                               | 0 |
| PREDICTED: similar to anti-PRSV coat protein monoclonal antibody PRSV-L 3-8 immunoglobulin light ch   | 0 |
| PREDICTED: similar to pleckstrin homology-like domain, family B, member 3 [Mus musculus]              | 0 |
| PREDICTED: ATP-binding cassette, sub-family C (CFTR/MRP), member 3 [Mus musculus]                     | 0 |
| PREDICTED: hypothetical protein LOC70153 [Mus musculus]                                               | 0 |
| PREDICTED: similar to sodium bicarbonate cotransporter 2b [Mus musculus]                              | 0 |
| PREDICTED: hypothetical protein XP_488848 [Mus musculus]                                              | 0 |
| PREDICTED: similar to glyceraldehyde-3-phosphate dehydrogenase [Mus musculus]                         | 0 |
| PREDICTED: similar to Succinate-Coenzyme A ligase, GDP-forming, beta subunit [Mus musculus]           | 0 |
| PREDICTED: similar to extensin-like protein [Mus musculus]                                            | 0 |
| UTP14, U3 small nucleolar ribonucleoprotein, homolog A [Mus musculus]                                 | 0 |
| phospholipase A2, group IVC (cytosolic, calcium-independent) [Mus musculus]                           | 0 |
| transient receptor potential cation channel, subfamily M, member 3 [Mus musculus]                     | 0 |
| plasma membrane calcium ATPase 4 [Mus musculus]                                                       | 0 |
| hypothetical protein LOC105000 [Mus musculus]                                                         | 0 |
| hypothetical protein LOC434285 [Mus musculus]                                                         | 0 |
| adaptor protein complex AP-1, gamma 1 subunit [Mus musculus]                                          | 0 |
| UDP-N-acetyl-alpha-D-galactosamine:polypeptide N-acetylgalactosaminyltransferase 14 [Mus musculus]    | 0 |
| PREDICTED: BAT2 domain containing 1 [Mus musculus]                                                    | 0 |
| PREDICTED: centrosomal protein 1 [Mus musculus]                                                       | 0 |
| PREDICTED: hypothetical protein XP_487763 [Mus musculus]                                              | 0 |
| PREDICTED: hypothetical protein XP_487709 [Mus musculus]                                              | 0 |
| PREDICTED: similar to Fc fragment of IgG binding protein [Mus musculus]                               | 0 |
| PREDICTED: similar to polytene protein [Mus musculus]                                                 | 0 |
| PREDICTED: RIKEN cDNA 4930565N07 [Mus musculus]                                                       | 0 |
| PREDICTED: CCR4-NOT transcription complex, subunit 1 [Mus musculus]                                   | 0 |
| PREDICTED: vacuolar protein sorting 13C [Mus musculus]                                                | 0 |
| PREDICTED: hypothetical protein LOC68553 [Mus musculus]                                               | 0 |
| PREDICTED: similar to ring finger protein 5 [Mus musculus]                                            | 0 |
| PREDICTED: similar to guanylate-binding protein 5 [Mus musculus]                                      | 0 |
| PREDICTED: similar to centrosome protein cep290 [Mus musculus]                                        | 0 |
| PREDICTED: similar to mKIAA1783 protein [Mus musculus]                                                | 0 |
| PREDICTED: similar to Peptidyl-prolyl cis-trans isomerase A (PPIase) (Rotamase) (Cyclophilin A) (Cy   | 0 |
| PREDICTED: similar to cytoplasmic beta-actin [Mus musculus]                                           | 0 |

|                                                                                                     |   |
|-----------------------------------------------------------------------------------------------------|---|
| PREDICTED: methylcrotonoyl-Coenzyme A carboxylase 2 (beta) [Mus musculus]                           | 0 |
| PREDICTED: similar to Dual specificity protein phosphatase 13 (Testis- and skeletal-muscle-specific | 0 |
| PREDICTED: kinesin family member 13B [Mus musculus]                                                 | 0 |
| PREDICTED: triple functional domain (PTPRF interacting) [Mus musculus]                              | 0 |
| PREDICTED: similar to Zinc finger protein 132 [Mus musculus]                                        | 0 |
| PREDICTED: similar to Cyp2c40 protein [Mus musculus]                                                | 0 |
| PREDICTED: similar to family with sequence similarity 26, member A [Mus musculus]                   | 0 |
| PREDICTED: hypothetical protein LOC73809 [Mus musculus]                                             | 0 |
