# Supplementary material
Source: PubMed Central journal article supplement (PMC2761368)
Supplement: 0909282106_ST5_PDF.pdf [file 0909282106_ST5_PDF.pdf]

**Table S5. AQUA Peptides**

| Protein                          | Peptide Sequence       | Labeled Amino Acid | MRM Transitions            | Precursor | Fragment | Amount added per 200 µg digest |
|----------------------------------|------------------------|--------------------|----------------------------|-----------|----------|--------------------------------|
| Coronin                          | AT-PE*P-SGT-PSS-DTV-SR | Glutamic Acid      | 794.6/595.5<br>797.6/595.5 | 2+        | y12 (2+) | 2.5 pmol                       |
| HMG CoA Synthase                 | DAS-PGS-PL*E-K         | Leucine            | 500.6/364.0<br>504.1/367.5 | 2+        | y7 (2+)  | 10 pmol                        |
| Solute Carrier Family Protein 25 | QIF-LGG-V*DR           | Valine             | 502.7/616.1<br>505.7/622.3 | 2+        | y6 (1+)  | 10 pmol                        |

Experimental details for those isotopically labeled peptides that were used for targeted quantification of each protein via stable isotopic dilution.
