# Supplementary material
Source: PubMed Central journal article supplement (PMC2761368)
Supplement: 0909282106_ST6_PDF.pdf [file 0909282106_ST6_PDF.pdf]

**Table S6. Summary of protein and mRNA quantitation by protein**

| NP Number   | Protein Name                                                                                     | Protein Ratio 1 | Protein Ratio 2 | Protein Ratio 3 | Protein Ratio 4 | # Protein Ratios | Protein Average | Protein SD  | NP Number | RNA Ratio   | RNA Ratio 2 | RNA Ratio 3 | RNA Ratio 4 | # RNA Ratios | RNA Average  | RNA SD      |
|-------------|--------------------------------------------------------------------------------------------------|-----------------|-----------------|-----------------|-----------------|------------------|-----------------|-------------|-----------|-------------|-------------|-------------|-------------|--------------|--------------|-------------|
| NP_00100201 | lamin A isoform A [Mus musculus]                                                                 | 0.34817605      | 0.61321711      | 0.05460729      | 0.36884309      | 4                | -0.172122861    | 0.41545084  | NM_019390 | 0.934569104 | 0.644207935 | 0.011649381 | 0.018870269 | 4            | 0.424824172  | 0.43863791  |
| NP_00100390 | clathrin, heavy polypeptide (Hc) [Mus musculus]                                                  | 0.11684647      | 0.14987254      | 0.06794637      | 0.08351998      | 4                | 0.062786352     | 0.103180541 | NM_001003 | 0.579676453 | 1.423873543 | 1.14602569  | 0.411569861 | 4            | 0.890286387  | 0.474610678 |
| NP_00100550 | hypothetical protein LOC229317 [Mus musculus]                                                    | 0.00769213      | 0.55415991      | 0.13375761      | 0.11649806      | 4                | 0.132302057     | 0.299221179 | NM_001005 | 0.214264362 | 0.861430544 | 0.848448459 | 0.827577858 | 4            | 0.580798125  | 0.530225063 |
| NP_031407.2 | acetyl-Coenzyme A dehydrogenase, long-chain [Mus musculus]                                       | 0.54873964      | 0.69152052      | 1.79646090      | 0.50187255      | 4                | -0.28795187     | 1.144096036 | NM_007381 | 0.267415212 | 0.710701043 | 1.272626943 | 0.878773859 | 4            | 0.782379264  | 0.416317366 |
| NP_031408.1 | acetyl-Coenzyme A dehydrogenase, medium chain [Mus musculus]                                     | 0.08662147      | 0.61781680      | 0.38217532      | 0.12915796      | 4                | -0.303942893    | 1.413014744 | NM_007382 | 1.528086924 | 0.859403583 | 1.026634667 | 0.866316363 | 4            | 1.070110334  | 0.319490219 |
| NP_031409.2 | acyl-Coenzyme A dehydrogenase, short chain [Mus musculus]                                        | 0.08662147      | 0.61781680      | 0.38217532      | 0.12915796      | 4                | -0.303942893    | 0.246587049 | NM_007383 | 1.561306205 | 0.257409787 | 0.002957964 | 0.219729764 | 4            | 0.270302172  | 0.867942726 |
| NP_031412.1 | aconitase 1 [Mus musculus]                                                                       | 0.45762702      | 0.48480398      | 0.35851166      | 0.12915796      | 3                | -0.110444902    | 0.51787729  | NM_007386 | 0.20883301  | 0.385299258 | 0.116728559 | 0.138179859 | 4            | 0.212260169  | 0.121885813 |
| NP_031435.1 | alcohol dehydrogenase 1 (class I) [Mus musculus]                                                 | 0.45048332      | 2.34651236      | 0.63435238      | 0.60213807      | 4                | 0.164884644     | 1.456626344 | NM_007409 | 2.983091429 | 2.887076281 | 3.706758074 | 3.270212214 | 4            | -3.211784510 | 0.367944101 |
| NP_031448.2 | adenylosuccinate synthetase, non muscle [Mus musculus]                                           | 0.02477429      | 0.26385714      | 0.19601158      | 0.15059343      | 2                | 0.144051952     | 0.489813587 | NM_007422 | 0.569876765 | 1.449614662 | 1.50404326  | 1.203123076 | 4            | 1.181664507  | 0.428357417 |
| NP_031464.1 | aldolase 1, A isoform [Mus musculus]                                                             | 0.02477429      | 0.26385714      | 0.19601158      | 0.15059343      | 4                | 0.014493397     | 0.208560983 | NM_007438 | 0.333189388 | 0.073651537 | 0.019087978 | 0.219309859 | 4            | 0.124483922  | 0.185216896 |
| NP_031478.1 | peroxiredoxin 3 [Mus musculus]                                                                   | 0.49139139      | 0.49139139      | 1.77603245      | 1.77603245      | 2                | 0.64232053      | 1.603310784 | NM_007452 | 0.398631371 | 0.554522185 | 0.706397944 | 0.76766038  | 4            | 0.407487285  | 0.544829879 |
| NP_031479.1 | peroxiredoxin 6 [Mus musculus]                                                                   | 0.74777002      | 1.35616059      | 1.12758822      | 1.75432410      | 4                | -0.568380441    | 1.348482422 | NM_007453 | 3.049529991 | 2.647175005 | 3.046837504 | 3.236252119 | 4            | 2.994948655  | 0.24822399  |
| NP_031512.1 | Rho, GDP dissociation inhibitor (GDI) beta [Mus musculus]                                        | 0.08024433      | 0.23976004      | 0.02589559      | 0.29873500      | 4                | -0.161158747    | 0.991961202 | NM_007486 | 2.172540974 | 0.246298323 | 0.378644891 | 0.063052162 | 4            | 0.40266248   | 1.194347295 |
| NP_031531.1 | ATP synthase, H+ transporting, mitochondrial F1 complex, alpha subunit, isoform 1 [Mus musculus] | 0.80446714      | 0.08822876      | 0.08822876      | 0.08822876      | 2                | 0.358119188     | 0.631231331 | NM_007508 | 0.019931569 | 0.652464511 | 0.544392324 | 0.041554015 | 4            | 0.314585605  | 0.330827515 |
| NP_031542.1 | heterogeneous nuclear ribonucleoprotein D [Mus musculus]                                         | 0.07307642      | 0.88080179      | 0.88080179      | 0.88080179      | 2                | 0.476939111     | 0.571148082 | NM_007516 | 0.793940815 | 1.198559855 | 1.521898138 | 1.45752071  | 4            | 1.24297988   | 0.330369684 |
| NP_031557.1 | B-cell receptor-associated protein 37 [Mus musculus]                                             | 0.19470154      | 0.03586270      | 0.12857449      | 0.43629669      | 4                | -0.19885886     | 0.171174034 | NM_007531 | 0.534830423 | 1.410011537 | 1.35561073  | 1.146638538 | 4            | 1.111772818  | 0.401032595 |
| NP_031568.2 | biglycan [Mus musculus]                                                                          | 0.20109143      | 0.15285001      | 0.13583279      | 0.74160618      | 4                | -0.139382993    | 0.429930495 | NM_007542 | 1.34205895  | 0.826192534 | 0.732600014 | 2.179339589 | 4            | 0.599018297  | 1.453117164 |
| NP_031599.1 | complement component 1, q subcomponent binding protein [Mus musculus]                            | 0.05588859      | 0.05588859      | 0.26548949      | 0.26548949      | 2                | -0.104800453    | 0.227248627 | NM_007573 | 0.999900357 | 1.36778054  | 1.511368457 | 1.547551525 | 4            | 1.35685022   | 0.250183526 |
| NP_031617.1 | calreticulin [Mus musculus]                                                                      | 0.48984082      | 0.23018398      | 0.44968418      | 0.19987722      | 4                | 0.227254567     | 0.330876107 | NM_007591 | 0.244327811 | 1.066852361 | 1.029837298 | 0.898737348 | 4            | 0.687774799  | 0.62557361  |
| NP_031623.1 | calnexin [Mus musculus]                                                                          | 0.01605571      | 0.74358413      | 0.64269941      | 0.09543016      | 4                | 0.3664145       | 0.382233031 | NM_007597 | 0.13365244  | 0.591567544 | 0.78043933  | 0.538824076 | 4            | 0.511120798  | 0.272185068 |
| NP_031624.1 | CAP, adenylate cyclase-associated protein 1 [Mus musculus]                                       | 0.06438389      | 0.30451263      | 0.29330407      | 0.39747953      | 4                | 0.264920034     | 0.141609784 | NM_007598 | 0.764043462 | 0.960367329 | 0.915260512 | 1.068811755 | 4            | 0.544599034  | 0.874738916 |
| NP_031625.1 | gelsolin-like capping protein [Mus musculus]                                                     | 0.10295821      | 0.06428102      | 1.70759928      | 1.70759928      | 3                | 0.556307365     | 1.000548375 | NM_007599 | 0.890276729 | 1.686477033 | 1.775275417 | 1.619815876 | 4            | 1.492961264  | 0.406804775 |
| NP_031626.1 | calpain 1 [Mus musculus]                                                                         | 0.016687        | 0.21043547      | 0.23404903      | 0.23404903      | 2                | 0.222242251     | 0.016687307 | NM_007600 | 0.280370731 | 0.711620214 | 0.366684999 | 0.57882488  | 4            | 0.34418484   | 0.439839284 |
| NP_031637.1 | caspase 7 [Mus musculus]                                                                         | 0.56359169      | 0.26908379      | 0.26908379      | 0.26908379      | 2                | -0.416337744    | 0.208248535 | NM_007611 | 2.180845794 | 1.285460715 | 0.291040141 | 0.894215207 | 4            | 1.162890465  | 0.792373207 |
| NP_031640.1 | catenin beta [Mus musculus]                                                                      | 0.91079549      | 0.04497539      | 0.04497539      | 0.04497539      | 3                | 0.317790317     | 0.517814793 | NM_007614 | 1.13277748  | 1.287614462 | 0.983429446 | 0.496468637 | 4            | 0.975072506  | 0.342386154 |
| NP_031642.1 | caveolin, caveolae protein 1 [Mus musculus]                                                      | 0.50755603      | 1.40620081      | 0.31211725      | 1.96541592      | 4                | -0.79404449     | 1.106535765 | NM_007616 | 3.743812963 | -2.232722   | 3.737805475 | 2.344724638 | 4            | 3.014653769  | 0.83975151  |
| NP_031663.1 | chaperonin subunit 5 (epsilon) [Mus musculus]                                                    | 0.03903678      | 0.45804086      | 0.13532113      | 0.13532113      | 3                | -0.094560983    | 0.318442913 | NM_007637 | 1.229113395 | 0.580232689 | 0.581143323 | 0.932327363 | 4            | 0.830704193  | 0.313088786 |
| NP_031664.2 | chaperonin subunit 7 (eta) [Mus musculus]                                                        | 0.19454040      | 0.82801032      | 0.82801032      | 0.82801032      | 2                | 0.316734958     | 0.723052552 | NM_007638 | 1.089592415 | 1.521385126 | 1.473144359 | 1.289326836 | 4            | 1.343362184  | 0.196515051 |
| NP_031756.1 | procollagen, type XII, alpha 1 [Mus musculus]                                                    | 0.54035246      | 0.10786196      | 0.10786196      | 0.10786196      | 2                | -0.324107214    | 0.30581696  | NM_007730 | 0.056472778 | 1.555137258 | 0.839868002 | 2.299563711 | 4            | 1.159524048  | 1.006152492 |
| NP_031795.1 | deleted in malignant brain tumors 1 [Mus musculus]                                               | 0.60006745      | 0.03027838      | 0.43318507      | 0.43318507      | 3                | -0.334324717    | 0.326594547 | NM_007769 | 1.557984277 | 0.20129204  | 0.644948586 | 0.734330413 | 4            | 0.005646691  | 1.068161315 |
| NP_031817.1 | cysteine and glycine-rich protein 1 [Mus musculus]                                               | 0.86263749      | 1.92436702      | 0.30960051      | 1.36309265      | 4                | -0.683470675    | 1.229138346 | NM_007791 | 1.521443067 | 1.096967634 | 0.069527879 | 0.131226654 | 4            | 0.055930225  | 1.084384433 |
| NP_031859.1 | decorin [Mus musculus]                                                                           | 1.11312229      | 0.26158241      | -1.14499358     | -1.14499358     | 3                | -0.66551156     | 0.803044709 | NM_007833 | 0.993256518 | 0.347579718 | 1.338805756 | 0.611268919 | 4            | 0.517093264  | 0.857103437 |
| NP_031864.2 | dolichyl-di-phosphooligosaccharide-protein glycotransferase [Mus musculus]                       | 0.17695042      | 0.44777965      | 0.37469411      | 0.05893604      | 4                | -0.040700234    | 0.350742826 | NM_007838 | 0.631166389 | 0.782195689 | 0.632168434 | 0.413302418 | 4            | 0.299125301  | 0.638422689 |
| NP_031868.1 | DEAH (Asp-Glu-Ala-His) box polypeptide 9 [Mus musculus]                                          | 0.65727969      | 0.42281918      | 0.11723518      | 0.14384968      | 4                | 0.335295937     | 0.255301141 | NM_007842 | 2.331993523 | 0.421064269 | 0.410334717 | 0.61831625  | 4            | 0.945427189  | 0.929300455 |
| NP_031909.1 | desmoglein 2 [Mus musculus]                                                                      | 0.24724063      | 0.22471940      | 0.22471940      | 0.22471940      | 2                | 0.235980023     | 0.015924914 | NM_007883 | 0.636702885 | 0.06535704  | 0.243300484 | 0.853766663 | 4            | 0.449781788  | 0.359888961 |

|             |                                                                                                    |                  |                 |                  |                  |   |              |                 |           |                 |                 |                 |                 |   |                 |                 |
|-------------|----------------------------------------------------------------------------------------------------|------------------|-----------------|------------------|------------------|---|--------------|-----------------|-----------|-----------------|-----------------|-----------------|-----------------|---|-----------------|-----------------|
| NP_031911.1 | solute carrier family 26 (sulfate transporter), member 2 [Mus musculus]                            | 0.50263541<br>5  | 0.11442699<br>6 | 0.54660442<br>3  | 1.41781673<br>8  | 4 | -0.588157395 | 0.630079<br>389 | NM_007885 | 4.1191908<br>38 | 2.7985982<br>2  | 2.7399972<br>56 | 2.9911887<br>29 | 4 | 3.1622437<br>6  | 0.646925<br>478 |
| NP_031933.1 | eukaryotic translation elongation factor 2 [Mus musculus]                                          | 0.10100647<br>1  | 0.00585036<br>9 | 0.28330404<br>8  | 0.30704786<br>1  | 4 | 0.171377003  | 0.149772<br>937 | NM_007907 | 0.5440210<br>91 | 0.7066024<br>06 | 0.3052625<br>56 | 0.3562495<br>62 | 4 | 0.2062033<br>58 | 0.530899<br>36  |
| NP_031994.1 | Ewing sarcoma breakpoint region 1 [Mus musculus]                                                   | 0.00754466<br>9  | 0.02000028<br>7 | 0.11091353<br>3  | 0.30877946<br>6  | 4 | -0.007613338 | 0.528412<br>32  | NM_007968 | 0.9251569<br>74 | 0.5954976<br>33 | 0.6663686<br>36 | 0.7574094<br>39 | 4 | 0.7361081<br>71 | 0.142333<br>961 |
| NP_032020.1 | fructose biphosphatase 2 [Mus musculus]                                                            | 0.00754466<br>9  | 0.02000028<br>7 | 0.11091353<br>3  | 0.30877946<br>6  | 4 | 0.101809346  | 0.149044<br>661 | NM_007994 | 0.7474338<br>21 | 0.1977692<br>98 | 0.0889324<br>93 | 0.0002634<br>29 | 4 | 0.1595833<br>97 | 0.409801<br>427 |
| NP_032040.1 | protein phosphatase 1G (formerly 2C), magnesium-dependent, gamma isoform [Mus musculus]            | 0.12056752<br>8  | 0.12056752<br>8 | 0.53856271<br>1  | 0.53856271<br>1  | 2 | -0.32956512  | 0.295567<br>229 | NM_008014 | 0.5746935<br>6  | 1.4492641<br>67 | 1.5521208<br>38 | 1.2905253<br>95 | 4 | 1.2166509<br>9  | 0.441291<br>921 |
| NP_032086.1 | alpha glucosidase 2 alpha neutral subunit [Mus musculus]                                           | 0.00563010<br>4  | 0.10935740<br>1 | 0.60713425<br>8  | 0.19745726<br>4  | 4 | 0.229894756  | 0.283429<br>764 | NM_008060 | 0.0069760<br>49 | 0.1600585<br>6  | 0.2394617<br>98 | 0.2755919<br>38 | 4 | 0.0327261<br>17 | 0.227065<br>543 |
| NP_032088.1 | glucose-6-phosphate dehydrogenase X-linked [Mus musculus]                                          | 0.10700163<br>3  | 1.35912046<br>8 | 1.08880528<br>5  | 1.08880528<br>5  | 3 | 0.125772272  | 0.790984<br>037 | NM_008062 | 0.9068863<br>7  | 1.3150333<br>28 | 1.2463200<br>06 | 0.8064225<br>94 | 4 | 1.0686655<br>74 | 0.249801<br>294 |
| NP_032107.1 | UDP-N-acetyl-alpha-D-galactosamine: (N-acetylneuraminy)-galactosyl-N- acetylglucosaminylpolypeptid | 0.10700163<br>3  | 1.35912046<br>8 | 1.08880528<br>5  | 1.08880528<br>5  | 3 | 0.125772272  | 1.224070<br>821 | NM_008081 | 2.4482610<br>06 | 0.1425783<br>96 | 0.0647152<br>42 | 0.0398991<br>6  | 4 | 0.5702166<br>32 | 1.254259<br>746 |
| NP_032138.2 | guanosine diphosphate (GDP) dissociation inhibitor 3 [Mus musculus]                                | 0.06036484<br>6  | 0.22058860<br>7 | 0.16341967<br>1  | 0.68409039<br>5  | 4 | 0.28211588   | 0.276062<br>449 | NM_008112 | 0.0643346<br>74 | 0.4900760<br>06 | 0.5067934<br>84 | 0.4003084<br>49 | 4 | 0.3332108<br>16 | 0.269123<br>354 |
| NP_032159.1 | glutamate dehydrogenase 1 [Mus musculus]                                                           | 0.02728889<br>9  | 0.60540669<br>4 | 0.34317054<br>5  | 0.29573215<br>3  | 4 | -0.132669851 | 0.409096<br>696 | NM_008133 | 0.1677573<br>69 | 0.4691309<br>37 | 0.3742038<br>12 | 0.3713623<br>38 | 4 | 0.2617349<br>3  | 0.289910<br>421 |
| NP_032164.2 | guanine nucleotide binding protein, alpha inhibiting 2 [Mus musculus]                              | 0.60820914<br>5  | 0.09004619<br>1 | 0.28381999<br>3  | 0.12439541<br>6  | 4 | 0.214419978  | 0.310993<br>558 | NM_008138 | 0.2561206<br>56 | 1.9663681<br>31 | 1.4585962<br>61 | 1.1441570<br>24 | 4 | 1.2063105<br>18 | 0.718345<br>205 |
| NP_032169.1 | guanine nucleotide binding protein (G protein), beta polypeptide 2 like 1 [Mus musculus]           | 0.04744359<br>5  | 0.29855929<br>7 | 0.18423689<br>3  | 0.50619569<br>2  | 4 | 0.259108869  | 0.194092<br>963 | NM_008143 | 0.4046108<br>42 | 0.2569866<br>76 | 0.1374684<br>24 | 0.0825379<br>11 | 4 | 0.0481386<br>7  | 0.287485<br>415 |
| NP_032181.1 | glucose phosphate isomerase 1 [Mus musculus]                                                       | 0.55512347<br>1  | 0.04223733<br>2 | 0.38606236<br>1  | 0.19220810<br>5  | 4 | -0.197803765 | 0.336367<br>282 | NM_008155 | 0.5846593<br>45 | 0.0579008<br>48 | 0.0816637<br>42 | 0.2918101<br>43 | 4 | 0.2540085<br>19 | 0.244212<br>934 |
| NP_032206.1 | glutathione synthetase [Mus musculus]                                                              | 0.66099183<br>6  | 0.03009880<br>4 | 0.29036677<br>6  | 0.29036677<br>6  | 3 | 0.113508752  | 0.491668<br>74  | NM_008180 | 0.4052752<br>28 | 0.7389111<br>39 | 0.3278285<br>47 | 0.4146959<br>1  | 4 | 0.2690400<br>92 | 0.483098<br>213 |
| NP_032238.1 | L-3-hydroxyacyl-Coenzyme A dehydrogenase, short chain [Mus musculus]                               | 0.35911775<br>5  | 0.40580642<br>4 | 0.42903798<br>5  | 0.42903798<br>5  | 3 | -0.397987388 | 0.035609<br>867 | NM_008212 | 1.7606218<br>9  | 0.2546538<br>59 | 0.8562060<br>38 | 0.5155246<br>36 | 4 | 0.8467516<br>06 | 0.657150<br>244 |
| NP_032274.1 | histidine triad nucleotide binding protein 1 [Mus musculus]                                        | 0.13239244<br>1  | 0.29807802<br>9 | 0.29807802<br>9  | 0.29807802<br>9  | 2 | 0.082842794  | 0.304388<br>589 | NM_008248 | 0.6444540<br>5  | 0.9195633<br>36 | 0.8413858<br>74 | 0.6665305<br>15 | 4 | 0.7679834<br>44 | 0.134060<br>42  |
| NP_032282.2 | 3-hydroxy-3-methylglutaryl-Coenzyme A synthase 2 [Mus musculus]                                    | 2.39600299<br>3  | 1.57424449<br>6 | 0.30220125<br>1  | 0.26140185<br>2  | 4 | -1.133462648 | 1.039195<br>571 | NM_008256 | 1.7373683<br>94 | 0.9838445<br>15 | 1.2189656<br>02 | 1.1377473<br>9  | 4 | 1.2694814<br>75 | 0.326808<br>998 |
| NP_032326.2 | heat shock protein 4 [Mus musculus]                                                                | 0.28262676<br>6  | 0.00519534<br>8 | 0.13514233<br>7  | 0.18034619<br>9  | 4 | 0.006916605  | 0.208567<br>915 | NM_008300 | 0.9389983<br>41 | 1.0374144<br>73 | 0.8496616<br>07 | 0.9449890<br>74 | 4 | 0.9427681<br>24 | 0.076694<br>065 |
| NP_032328.2 | heat shock protein 1, beta [Mus musculus]                                                          | 0.11373576<br>7  | 0.30041566<br>1 | 0.31100741<br>3  | 0.45444143<br>7  | 4 | 0.238032186  | 0.244806<br>548 | NM_008302 | 1.1693186<br>89 | 1.6682724<br>3  | 1.5464867<br>74 | 1.3695591<br>8  | 4 | 1.4384092<br>69 | 0.217307<br>689 |
| NP_032329.1 | heat shock protein 1 (chaperonin 10) [Mus musculus]                                                | 0.19160282<br>5  | 0.11593768<br>6 | 0.60164359<br>3  | 0.10077629<br>4  | 4 | 0.14413311   | 0.143353<br>025 | NM_008303 | 0.6942829<br>72 | 0.4738382<br>85 | 0.6902704<br>35 | 1.0588938<br>13 | 4 | 0.7292313<br>76 | 0.242653<br>571 |
| NP_032405.2 | karyopherin (importin) beta 1 [Mus musculus]                                                       | 0.11136184<br>8  | 1.18273465<br>1 | -0.08289529<br>1 | -0.08289529<br>1 | 3 | 0.329492504  | 0.739066<br>443 | NM_008379 | 1.0713218<br>11 | 0.5217619<br>05 | 0.6331924<br>17 | 0.7252321<br>33 | 4 | 0.7378998<br>16 | 0.237351<br>803 |
| NP_032434.2 | intergal membrane protein 1 [Mus musculus]                                                         | 0.19160282<br>5  | 0.11593768<br>6 | 0.60164359<br>3  | 0.10077629<br>4  | 4 | 0.14413311   | 0.336247<br>256 | NM_008408 | 0.5235358<br>68 | 0.0528576<br>76 | 0.1823237<br>43 | 0.0727457<br>48 | 4 | 0.0803310<br>13 | 0.310701<br>005 |
| NP_032474.1 | kinesin family member 5B [Mus musculus]                                                            | 0.63880892<br>5  | 0.26798289<br>9 | 0.79112432<br>3  | 0.92353468<br>7  | 4 | -0.059603916 | 0.805082<br>849 | NM_008448 | 1.2324353<br>23 | 1.7042878<br>08 | 1.6032811<br>08 | 1.3354642<br>84 | 4 | 1.4688671<br>31 | 0.221499<br>685 |
| NP_032497.1 | keratin complex 1, acidic, gene 19 [Mus musculus]                                                  | 0.39881850<br>1  | 0.38935876<br>9 | -0.24898181<br>1 | 0.02912989<br>1  | 4 | -0.057327913 | 0.346578<br>987 | NM_008471 | 0.7075706<br>84 | 0.5841874<br>52 | 0.4517408<br>56 | 0.3739725<br>73 | 4 | 0.1755825<br>49 | 0.595130<br>129 |
| NP_032508.1 | laminin B1 subunit 1 [Mus musculus]                                                                | 1.22871594<br>6  | 0.27033941<br>2 | 0.09741563<br>3  | 1.38353931<br>2  | 4 | -0.081936786 | 1.076977<br>647 | NM_008482 | 0.3953094<br>43 | 0.9034001<br>39 | 0.2409855<br>03 | 1.5640376<br>2  | 4 | 0.7759331<br>76 | 0.596769<br>045 |
| NP_032509.2 | laminin, beta 2 [Mus musculus]                                                                     | 1.15462252<br>5  | 0.54594082<br>7 | 2.63926387<br>8  | 2.63926387<br>8  | 3 | -0.312900178 | 2.037547<br>399 | NM_008483 | 1.0862704<br>87 | 0.3500699<br>48 | 0.2229375<br>56 | 0.0600783<br>12 | 4 | 0.2883311<br>41 | 0.584038<br>729 |
| NP_032521.1 | lectin, galactose binding, soluble 1 [Mus musculus]                                                | 0.90263518<br>6  | 1.21427409<br>7 | 1.21427409<br>7  | 1.21427409<br>7  | 2 | -0.155819455 | 1.496880<br>91  | NM_008495 | 1.1194897<br>68 | 0.4112399<br>82 | 0.9438407<br>94 | 0.0058468<br>23 | 4 | 0.6171809<br>3  | 0.513028<br>943 |
| NP_032543.1 | leukotriene A4 hydrolase [Mus musculus]                                                            | 0.10426416<br>3  | 0.03759860<br>1 | 0.01405347<br>9  | 0.34957264<br>5  | 4 | -0.119345483 | 1.666057<br>818 | NM_008517 | 0.7740092<br>46 | 1.4474325<br>59 | 1.0151698<br>81 | 0.6266237<br>57 | 4 | 0.9658088<br>61 | 0.358808<br>92  |
| NP_032558.1 | lymphocyte antigen 74 [Mus musculus]                                                               | -0.02847553<br>1 | 0.62143799<br>9 | 0.08538164<br>3  | 0.23286391<br>2  | 4 | 0.068679226  | 0.378437<br>275 | NM_008532 | 0.0601268<br>99 | 0.5868552<br>45 | 0.6769845<br>3  | 0.3494656<br>4  | 4 | 0.4183580<br>78 | 0.275895<br>32  |
| NP_032643.2 | malate dehydrogenase 2, NAD (mitochondrial) [Mus musculus]                                         | 0.10426416<br>3  | 0.03759860<br>1 | 0.01405347<br>9  | 0.34957264<br>5  | 4 | -0.119345483 | 0.160944<br>947 | NM_008617 | 0.3046208<br>06 | 0.6009836<br>48 | 0.4095077<br>03 | 0.3366633<br>04 | 4 | 0.4129438<br>65 | 0.132819<br>898 |
| NP_032644.2 | malate dehydrogenase 1, NAD (soluble) [Mus musculus]                                               | 0.10965595<br>2  | 0.04504112<br>8 | 0.08714288<br>3  | -0.2259577<br>4  | 4 | -0.116949416 | 0.077449<br>407 | NM_008618 | 0.3968043<br>11 | 1.2991943<br>52 | 1.2529152<br>27 | 0.9243925<br>59 | 4 | 0.9683266<br>12 | 0.415945<br>542 |
| NP_032688.1 | myosin VI [Mus musculus]                                                                           | 0.23055366<br>1  | 0.04609523<br>5 | 0.42941458<br>6  | 0.42941458<br>6  | 3 | 0.050921896  | 0.340512<br>503 | NM_001039 | 0.3252167<br>6  | 1.1151004<br>73 | 1.1130743<br>77 | 0.9085358<br>5  | 4 | 0.7028734<br>85 | 0.692209<br>608 |
| NP_032786.1 | osteolectin [Mus musculus]                                                                         | 1.36871460<br>4  | 0.18694264<br>7 | 1.20642064<br>3  | 1.20642064<br>3  | 3 | -0.7960642   | 0.855167<br>632 | NM_008760 | 3.7537787<br>89 | 3.3554362<br>14 | 4.3154610<br>39 | 3.6963022<br>72 | 4 | 3.7802445<br>68 | 0.397771<br>106 |
| NP_032823.1 | pyruvate carboxylase [Mus musculus]                                                                | 1.24480127<br>5  | 0.38128717<br>8 | 0.16748464<br>7  | 0.16748464<br>7  | 3 | -0.486201271 | 0.711964<br>256 | NM_008797 | 2.2755207<br>45 | 1.0681536<br>71 | 1.4349218<br>86 | 1.9888352<br>34 | 4 | 1.6868578<br>84 | 0.539228<br>412 |
| NP_032836.1 | pyruvate dehydrogenase E1 alpha 1 [Mus musculus]                                                   | 0.16442841<br>8  | -0.2133256<br>1 | 0.07785879<br>1  | 0.07785879<br>1  | 3 | -0.099965076 | 0.155928<br>604 | NM_008810 | 0.2978108<br>54 | 0.2214148<br>62 | 0.0642962<br>98 | 0.1615021<br>98 | 4 | 0.0373506<br>03 | 0.232631<br>71  |
| NP_032852.2 | phosphofructokinase, liver, B-type [Mus musculus]                                                  | 0.92989331<br>2  | 0.28735633<br>8 | 0.28735633<br>8  | 0.28735633<br>8  | 2 | -0.608624825 | 0.454342<br>251 | NM_008826 | 0.8736670<br>89 | 0.4665753<br>12 | 0.0429369<br>17 | 0.0312343<br>06 | 4 | 0.1046985<br>97 | 0.559749<br>551 |
| NP_032900.2 | phospholipase C, beta 3 [Mus musculus]                                                             | 1.80645925<br>3  | 0.45811159<br>3 | 0.52785415<br>4  | 0.10822593<br>4  | 3 | -0.059322831 | 0.494798<br>695 | NM_008874 | 0.7839750<br>3  | 0.1729023<br>34 | 0.1383600<br>89 | 0.2288364<br>95 | 4 | 0.3310184<br>87 | 0.304263<br>464 |
| NP_032905.2 | lymphocyte cytosolic protein 1 [Mus musculus]                                                      | 0.12758019<br>5  | 0.31555162<br>4 | 0.25399098<br>5  | 0.26074018<br>4  | 4 | 0.239465747  | 0.795435<br>657 | NM_008879 | 2.1509434<br>41 | 1.2792473<br>14 | 1.4561833<br>83 | 1.5669129<br>96 | 4 | 1.6133230<br>26 | 0.377489<br>285 |
| NP_032933.1 | peptidylprolyl isomerase A [Mus musculus]                                                          | 0.12758019<br>5  | 0.31555162<br>4 | 0.25399098<br>5  | 0.26074018<br>4  | 4 | 0.239465747  | 0.079521<br>531 | NM_008907 | 0.2654220<br>55 | 1.5533977<br>73 | 1.5142647<br>96 | 2.0430154<br>96 | 4 | 1.3440250<br>3  | 0.758241<br>512 |

|             |                                                                              |                 |                  |                   |                  |              |                 |                  |                 |                 |                 |                 |                 |                 |                  |                 |
|-------------|------------------------------------------------------------------------------|-----------------|------------------|-------------------|------------------|--------------|-----------------|------------------|-----------------|-----------------|-----------------|-----------------|-----------------|-----------------|------------------|-----------------|
| NP_032946.1 | proteoglycan 2, bone marrow [Mus musculus]                                   | 2.88029077<br>6 | 0.71549303<br>4  | 0.65548733<br>3   | 3                | 0.940095024  | 1.814708<br>367 | NM_008920        | 0.6577417<br>63 | 0.2905223<br>24 | 1.0230920<br>89 | 0.0158857<br>59 | 4               | 0.4888676<br>04 | 0.450196<br>657  |                 |
| NP_032950.1 | protein kinase, cAMP dependent regulatory, type II alpha [Mus musculus]      | 0.40284685<br>6 | 0.14562914<br>1  | 0.33464318<br>3   | 0.12437358<br>9  | 4            | -0.01173703     | 0.321660<br>926  | NM_008924       | 0.8991352<br>04 | 0.6917256<br>11 | 0.4127773<br>47 | 0.2365132<br>87 | 4               | 0.1104702<br>6   | 0.698674<br>315 |
| NP_032951.1 | protein kinase C substrate 80K-H [Mus musculus]                              | 0.10425902<br>1 | 0.22438160<br>9  | 0.45540935<br>2   | 0.37588155<br>7  | 4            | 0.102042106     | 0.350357<br>583  | NM_008925       | 0.2521343<br>42 | 0.8156571<br>75 | 0.7399946<br>92 | 0.5116805<br>61 | 4               | 0.5798666<br>93  | 0.253834<br>572 |
| NP_032972.2 | proteasome (prosome, macropain) subunit, beta type 6 [Mus musculus]          | 0.43322533<br>7 | -                | -                 | 1.28506326<br>5  | 2            | -0.425918964    | 1.215013<br>523  | NM_008946       | 0.6187876<br>26 | 0.1239173<br>56 | 0.2812106<br>07 | 0.3469806<br>75 | 4               | 0.3374968<br>16  | 0.208278<br>399 |
| NP_032982.1 | polypyrimidine tract binding protein 1 [Mus musculus]                        | 0.09171571<br>4 | -                | 0.22276415<br>9   | 0.09597122<br>3  | 3            | 0.075673222     | 0.158219<br>481  | NM_008956       | 1.0015613<br>21 | 1.5917891<br>42 | 1.5335058<br>59 | 1.3410297<br>59 | 4               | 1.3669715<br>2   | 0.266129<br>19  |
| NP_033012.1 | polymerase I and transcript release factor [Mus musculus]                    | 0.25322644<br>5 | 1.32441314<br>9  | 0.23012347<br>5   | 1.46224365<br>5  | 4            | -0.690888458    | 0.836659<br>966  | NM_008986       | 0.5114938<br>78 | 0.6462386<br>7  | 0.0942945<br>77 | 0.2095808<br>72 | 4               | 0.2806113<br>63  | 0.391745<br>014 |
| NP_033015.1 | purine rich element binding protein A [Mus musculus]                         | 0.40434925<br>1 | -                | 0.19298422<br>8   | -                | 2            | -0.298666739    | 0.149457<br>641  | NM_008989       | 0.0730824<br>18 | 0.5766522<br>12 | 0.6120821<br>04 | 0.4887640<br>64 | 4               | 0.4376451<br>99  | 0.248509<br>117 |
| NP_033017.2 | ATP-binding cassette, sub-family D, member 3 [Mus musculus]                  | 0.74823345<br>2 | -                | 0.83095587<br>4   | -                | 2            | 0.041361211     | 1.116655<br>481  | NM_008991       | 0.6344882<br>66 | 0.4982180<br>77 | 0.6063929<br>85 | 0.3759605<br>12 | 4               | 0.2115208<br>27  | 0.571807<br>406 |
| NP_033022.1 | RAB1, member RAS oncogene family [Mus musculus]                              | 0.05424923<br>5 | 0.08929780<br>3  | 0.27404800<br>8   | 3                | -0.07966648  | 0.183001<br>562 | NM_008996        | 0.2420024<br>62 | 0.1386504<br>45 | 0.0221508<br>82 | 0.0455647<br>4  | 4               | 0.0091591<br>08 | 0.163275<br>924  |                 |
| NP_033031.1 | RAB7, member RAS oncogene family [Mus musculus]                              | 0.02114130<br>6 | 0.316849<br>4    | 0.08524783<br>3   | 0.31616233<br>1  | 3            | 0.126985177     | 0.172817<br>435  | NM_009005       | 0.0782314<br>07 | 0.2583571<br>13 | 0.3025510<br>59 | 0.1126374<br>4  | 4               | 0.1488285<br>51  | 0.171748<br>98  |
| NP_033035.2 | RAD21 homolog [Mus musculus]                                                 | 0.07843551<br>4 | 0.31616233<br>1  | 0.279022<br>812   | 0.118863409<br>2 | 2            | 0.118863409     | 0.279022<br>812  | NM_009009       | 0.8985815<br>5  | 0.7206876<br>84 | 0.9017991<br>11 | 0.4406881<br>95 | 4               | 0.7404391<br>35  | 0.217015<br>215 |
| NP_033103.1 | ribosomal protein L18 [Mus musculus]                                         | 0.02548915<br>3 | 0.20586749<br>8  | 0.18951937<br>3   | 0.76805547<br>7  | 4            | 0.284488299     | 0.339177<br>222  | NM_009077       | 0.0857057<br>45 | 0.0969805<br>12 | 0.0068387<br>87 | 0.2448210<br>75 | 4               | 0.1085865<br>29  | 0.099281<br>896 |
| NP_033105.1 | ribosomal protein L22 [Mus musculus]                                         | 0.46642463<br>1 | 1.50437765<br>9  | 0.33217227<br>9   | 3                | 0.456708433  | 0.991285<br>704 | NM_009079        | 0.4152410<br>12 | 0.1386982<br>98 | 0.1652968<br>9  | 0.0231269<br>08 | 4               | 0.1740273<br>23 | 0.181087<br>635  |                 |
| NP_033158.1 | scinderin [Mus musculus]                                                     | 1.31635174<br>5 | 0.51244051<br>4  | 1.14726187<br>4   | 0.39978874<br>7  | 4            | 0.38784609      | 0.978045<br>617  | NM_009132       | 4.4181643<br>66 | 2.9204823<br>79 | 3.7878278<br>69 | 3.7607136<br>91 | 4               | 3.7217970<br>76  | 0.614520<br>739 |
| NP_033176.2 | selenium binding protein 1 [Mus musculus]                                    | 1.32300991<br>6 | 0.19408365<br>9  | 0.93997785<br>6   | 0.97652013<br>8  | 4            | -0.761356062    | 0.659929<br>652  | NM_009150       | 3.2455237<br>49 | 3.7247489<br>33 | 4.1845383<br>32 | 4.2146489<br>83 | 4               | 3.8423649<br>99  | 0.456702<br>3   |
| NP_033192.1 | sorbin and SH3 domain containing 1 [Mus musculus]                            | 0.05412642<br>6 | 0.07180983<br>2  | 0.062968129<br>2  | 0.012504<br>056  | 2            | 0.062968129     | 0.012504<br>056  | NM_009166       | 2.9997010<br>7  | 1.6793403<br>44 | 1.3935379<br>6  | 1.5904290<br>6  | 4               | 1.9157521<br>08  | 0.732433<br>973 |
| NP_033220.1 | solute carrier family 12, member 2 [Mus musculus]                            | 1.70648597<br>7 | 0.06090671<br>7  | -0.883696347<br>2 | 1.163600<br>254  | 2            | -0.883696347    | 1.163600<br>254  | NM_009194       | 1.0397634<br>94 | 1.1981013<br>79 | 1.0408725<br>06 | 0.7861467<br>11 | 4               | 1.0162210<br>23  | 0.170466<br>611 |
| NP_033222.1 | solute carrier family 16, member 1 [Mus musculus]                            | 0.60177722<br>1 | 0.13478811<br>3  | 0.14946780<br>3   | 0.39974030<br>3  | 4            | -0.321443361    | 0.222959<br>83   | NM_009196       | 1.7927338<br>62 | 1.6569205<br>08 | 1.5665517<br>57 | 1.6464618<br>44 | 4               | 1.6656669<br>93  | 0.093835<br>242 |
| NP_033252.1 | small nuclear ribonucleoprotein D1 [Mus musculus]                            | 0.10274080<br>1 | 0.05423808<br>1  | -0.02425136<br>2  | 0.111000<br>832  | 2            | -0.02425136     | 0.111000<br>832  | NM_009226       | 1.1261336<br>24 | 0.5249797<br>07 | 0.5187356<br>95 | 1.0872120<br>31 | 4               | 0.8142652<br>64  | 0.338026<br>464 |
| NP_033280.1 | serine (or cysteine) proteinase inhibitor, clade B, member 6a [Mus musculus] | 0.50817340<br>4 | 0.11138872<br>3  | 0.15018497<br>5   | 0.369413<br>529  | 3            | -0.082199902    | 0.369413<br>529  | NM_009254       | 1.3520247<br>35 | 0.3356657<br>36 | 0.1762722<br>71 | 0.0686193<br>41 | 4               | 0.2271765<br>17  | 0.768111<br>584 |
| NP_033305.1 | signal sequence receptor, delta [Mus musculus]                               | 0.09970858<br>6 | 0.28191780<br>1  | 0.29327494<br>3   | 0.68757524<br>8  | 4            | 0.290764852     | 0.321461<br>541  | NM_009279       | 0.7158755<br>04 | 0.4703761<br>25 | 0.7093651<br>05 | 0.2757241<br>69 | 4               | 0.5428352<br>26  | 0.211560<br>69  |
| NP_033313.2 | stromal interaction molecule 1 [Mus musculus]                                | 0.04638254<br>1 | 0.07060507<br>9  | 0.77817314<br>7   | 3                | -0.267465228 | 0.446137<br>265 | NM_009287        | 2.3951101<br>56 | 1.0935107<br>46 | 1.7825411<br>94 | 1.7760662<br>71 | 4               | 1.7618070<br>92 | 0.531766<br>241  |                 |
| NP_033395.1 | transforming growth factor, beta induced [Mus musculus]                      | 0.21356593<br>8 | 0.09101940<br>1  | -0.15229267<br>2  | 0.086653<br>487  | 2            | -0.15229267     | 0.086653<br>487  | NM_009369       | 1.5712719<br>89 | 1.3698662<br>66 | 0.9935337<br>09 | 1.6540835<br>01 | 4               | 1.3971888<br>66  | 0.294382<br>856 |
| NP_033399.1 | transglutaminase 2, C polypeptide [Mus musculus]                             | 0.29043899<br>1 | 0.58797263<br>3  | 0.08501845<br>9   | 0.42378700<br>7  | 4            | 0.010308726     | 0.453308<br>251  | NM_009373       | 1.2069672<br>08 | 1.9903028<br>7  | 2.3764717<br>7  | 2.4643057<br>29 | 4               | 2.0095118<br>77  | 0.573278<br>276 |
| NP_033400.1 | transglutaminase 3, E polypeptide [Mus musculus]                             | 1.11847981<br>4 | 2.36058234<br>6  | -1.73953108<br>2  | 0.878299<br>123  | 2            | -1.73953108     | 0.878299<br>123  | NM_009374       | 3.2089825<br>4  | 2.0404749<br>46 | 3.6649593<br>76 | 3.6465391<br>42 | 4               | 3.1402390<br>01  | 0.762862<br>582 |
| NP_033414.1 | transketolase [Mus musculus]                                                 | 0.13987558<br>2 | 0.15598979<br>3  | 0.21674342<br>9   | 0.01310683<br>4  | 4            | 0.124875493     | 0.097761<br>517  | NM_009388       | 0.1474936<br>07 | 0.7311528<br>18 | 0.6876066<br>97 | 0.6862195<br>06 | 4               | 0.5631181<br>57  | 0.277867<br>326 |
| NP_033441.1 | triosephosphate isomerase 1 [Mus musculus]                                   | 0.36980401<br>8 | 0.94311264<br>3  | 0.4053094<br>416  | 0.656458331<br>2 | 2            | 0.656458331     | 0.4053094<br>416 | NM_009415       | 0.3953094<br>43 | 1.0011611<br>18 | 0.8557004<br>91 | 0.5437094<br>85 | 4               | 0.5013154<br>13  | 0.627473<br>214 |
| NP_033463.1 | thiosulfate sulfurtransferase, mitochondrial [Mus musculus]                  | 0.36522221<br>9 | 0.09133153<br>7  | 0.41627377<br>9   | 0.08779858<br>9  | 4            | -0.196257236    | 0.237103<br>043  | NM_009437       | 1.3420589<br>5  | 0.4670872<br>9  | 1.0336728<br>18 | 0.7683686<br>99 | 4               | 0.9027969<br>39  | 0.373270<br>885 |
| NP_033465.1 | proteasome 26S non-ATPase subunit 3 [Mus musculus]                           | 0.18899273<br>5 | 0.01960619<br>6  | 0.104299465<br>2  | 0.119774<br>371  | 2            | 0.104299465     | 0.119774<br>371  | NM_009439       | 1.0995581<br>99 | 0.9782109<br>76 | 1.2309809<br>06 | 1.1234263<br>46 | 4               | 1.1080461<br>07  | 0.103731<br>527 |
| NP_033473.1 | tubulin, alpha 4 [Mus musculus]                                              | 0.28854253<br>9 | 0.42638517<br>9  | 0.31348723<br>4   | 0.22522629<br>5  | 4            | 0.012395425     | 0.371235<br>622  | NM_009447       | 0.9268179<br>38 | 1.4999037<br>48 | 1.3441459<br>93 | 1.2228778<br>38 | 4               | 1.2484363<br>79  | 0.242547<br>472 |
| NP_033477.2 | tubulin, beta 4 [Mus musculus]                                               | 0.14065770<br>8 | 0.36278943<br>2  | -0.111065862<br>2 | 0.355990<br>887  | 2            | -0.111065862    | 0.355990<br>887  | NM_009451       | 1.7008271<br>85 | 1.5514275<br>11 | 1.4092027<br>91 | 1.2881972<br>48 | 4               | 1.4874136<br>84  | 0.178369<br>676 |
| NP_033483.1 | ubiquitin-activating enzyme E1, Chr X [Mus musculus]                         | 0.01954812<br>3 | 0.10972862<br>2  | 0.22911714<br>4   | 0.07055678<br>4  | 4            | 0.071959275     | 0.128040<br>194  | NM_009457       | 0.0800584<br>67 | 0.9028973<br>62 | 0.6597203<br>99 | 0.5145736<br>58 | 4               | 0.5393124<br>72  | 0.345551<br>873 |
| NP_033492.1 | UDP-glucose dehydrogenase [Mus musculus]                                     | 1.36505804<br>4 | 1.34073382<br>5  | 0.71789623<br>5   | 0.22441548<br>6  | 4            | -0.912025897    | 0.547577<br>397  | NM_009466       | 2.4814802<br>87 | 2.1942082<br>23 | 2.8216344<br>16 | 2.7736913<br>33 | 4               | 2.5677535<br>65  | 0.290886<br>605 |
| NP_033494.1 | dihydropyrimidinase-like 3 [Mus musculus]                                    | 0.20013157<br>4 | -0.40148022<br>4 | -2.24229914<br>8  | 3.24770721<br>8  | 4            | 0.100949071     | 2.290268<br>089  | NM_009468       | 1.6011693<br>42 | 1.4631382<br>83 | 0.6492651<br>62 | 0.7852493<br>62 | 4               | 1.1247055<br>37  | 0.477084<br>383 |
| NP_033525.1 | vasodilator-stimulated phosphoprotein [Mus musculus]                         | 0.29599093<br>4 | 0.08967938<br>1  | -0.192835157<br>2 | 0.145884<br>298  | 2            | -0.192835157    | 0.145884<br>298  | NM_009499       | 0.7275022<br>53 | 0.4168979<br>63 | 0.2752274<br>86 | 0.1183219<br>8  | 4               | 0.0207362<br>94  | 0.513515<br>246 |
| NP_033528.3 | vinculin [Mus musculus]                                                      | 0.93361026<br>1 | 1.00781261<br>1  | 0.04384106<br>8   | 0.91644070<br>2  | 4            | -0.236700496    | 0.913781<br>79   | NM_009502       | 0.3675713<br>44 | 0.8146754<br>59 | 0.1796976<br>11 | 0.4315983<br>25 | 4               | 0.2325865<br>11  | 0.516716<br>288 |
| NP_033529.2 | valosin containing protein [Mus musculus]                                    | 0.01363064<br>4 | 0.24674544<br>4  | 0.32787303<br>3   | 0.23461037<br>4  | 4            | 0.205714874     | 0.134582<br>595  | NM_009503       | 1.1975550<br>78 | 1.2436768<br>74 | 1.1530079<br>21 | 1.0154760<br>75 | 4               | 1.1524289<br>87  | 0.098520<br>685 |
| NP_033535.1 | villin 1 [Mus musculus]                                                      | 0.41138490<br>6 | 0.30579024<br>6  | 0.16352437<br>9   | 0.22423917<br>3  | 4            | -0.011219967    | 0.336286<br>135  | NM_009509       | 0.3870046<br>23 | 0.5097973<br>12 | 0.0287079<br>46 | 0.5956408<br>02 | 4               | 0.3802876<br>71  | 0.248534<br>993 |
| NP_033536.1 | villin 2 [Mus musculus]                                                      | 0.00055582<br>6 | 0.25708420<br>7  | 0.02396105<br>7   | 0.23369359<br>4  | 4            | 0.011976874     | 0.200587<br>175  | NM_009510       | 0.3059495<br>78 | -               | 0.2420239<br>8  | 0.6535163<br>4  | 4               | 0.1737906<br>661 |                 |



|             |                                                                                           |                 |                  |                  |                  |   |              |                 |           |                 |                 |                 |                 |   |                       |                 |
|-------------|-------------------------------------------------------------------------------------------|-----------------|------------------|------------------|------------------|---|--------------|-----------------|-----------|-----------------|-----------------|-----------------|-----------------|---|-----------------------|-----------------|
| NP_034253.2 | eukaryotic translation initiation factor 3, subunit 10 (theta) [Mus musculus]             | 0.39055020<br>7 | 0.30811814<br>9  | 0.48351666<br>8  | 0.14531235<br>9  | 4 | 0.259218166  | 0.279042<br>456 | NM_010123 | 1.9333621<br>51 | 1.1204797<br>92 | 1.0851957<br>8  | 0.9421124<br>91 | 4 | 1.2702875<br>54       | 0.448727<br>135 |
| NP_034339.1 | fumarate hydratase 1 [Mus musculus]                                                       | 0.50144102<br>9 | 0.04942064<br>9  | 0.21507743<br>1  | 0.91509736<br>4  | 4 | -0.395548794 | 0.413001<br>856 | NM_010209 | 0.2145965<br>55 | 0.0505506<br>8  | 0.0285211<br>08 | 0.2508492<br>51 | 4 | 0.0035557<br>81       | 0.193472<br>891 |
| NP_034341.1 | four and a half LIM domains 1 [Mus musculus]                                              | 0.61652679<br>3 | 1.20969497<br>7  | 0.15241808<br>3  | 1.88224164<br>3  | 4 | -0.656956978 | 1.108025<br>604 | NM_010211 | 5.1489885<br>47 | 3.6228250<br>96 | 5.5889043<br>53 | 4.6374236<br>62 | 4 | 4.7495354<br>15       | 0.845803<br>012 |
| NP_034403.1 | guanosine diphosphate (GDP) dissociation inhibitor 1 [Mus musculus]                       | 0.11061578<br>3 | 0.00553808<br>6  | 0.14961491<br>5  | 0.36582633<br>5  | 2 | -0.180144125 | 0.262594<br>3   | NM_010273 | 0.8371258<br>8  | 0.5818946<br>87 | 0.6168149<br>77 | 0.3747393<br>47 | 4 | 0.1840807<br>83       | 0.689136<br>784 |
| NP_034436.1 | guanine nucleotide binding protein, alpha inhibiting 3 [Mus musculus]                     | 0.11061578<br>3 | 0.00553808<br>6  | 0.14961491<br>5  | 0.36582633<br>5  | 2 | 0.130115349  | 0.027576<br>55  | NM_010306 | 0.9700030<br>04 | 0.8079675<br>73 | 0.7713990<br>83 | 0.6204939<br>2  | 4 | 0.7924433<br>95       | 0.143505<br>744 |
| NP_034454.1 | glutamate oxaloacetate transaminase 1, soluble [Mus musculus]                             | 0.07462178<br>2 | 0.79764575<br>5  | 1.05427119<br>9  | 0.28901693<br>2  | 2 | -0.128312722 | 1.309503<br>036 | NM_010324 | 0.6510979<br>07 | 1.0559117<br>62 | 0.4165869<br>79 | 0.9003528<br>91 | 4 | 0.7558973<br>83       | 0.281063<br>738 |
| NP_034455.1 | glutamate oxaloacetate transaminase 2, mitochondrial [Mus musculus]                       | 0.68939700<br>6 | 0.07462178<br>2  | -0.01684248<br>2 | 0.28901693<br>2  | 3 | -0.126827065 | 0.143400<br>755 | NM_010325 | 0.6311663<br>38 | 0.8867826<br>52 | 0.9205251<br>5  | 0.5598199<br>93 | 4 | 0.7495735<br>33       | 0.180810<br>645 |
| NP_034474.3 | glutathione reductase 1 [Mus musculus]                                                    | 0.68939700<br>6 | 0.25640974<br>4  | 0.32316651<br>7  | 0.508047<br>16   | 3 | -0.207546744 | 0.508047<br>16  | NM_010344 | 1.1693186<br>89 | 1.1800285<br>94 | 1.1128069<br>31 | 0.8856429<br>28 | 4 | 1.0869492<br>86       | 0.137406<br>143 |
| NP_034488.1 | glutathione S-transferase, mu 1 [Mus musculus]                                            | 0.6304598<br>8  | -0.01541211<br>- | -0.91696247<br>- | 0.637492<br>373  | 2 | -0.46618729  | 0.637492<br>373 | NM_010358 | 2.3552470<br>19 | 1.4442296<br>29 | 1.7675583<br>09 | 1.4372550<br>82 | 4 | 1.7510725<br>1        | 0.431251<br>107 |
| NP_034492.1 | glutathione S-transferase omega 1 [Mus musculus]                                          | 0.15661550<br>5 | 0.51628253<br>3  | 0.25855758<br>5  | 0.02827508<br>8  | 4 | -0.072049032 | 0.421866<br>999 | NM_010362 | 1.2656546<br>04 | 0.3595018<br>19 | 0.5177634<br>33 | 0.3765115<br>23 | 4 | 0.6298578<br>45       | 0.429759<br>396 |
| NP_034568.1 | hexokinase 1 [Mus musculus]                                                               | 0.15661550<br>5 | 0.30802375<br>3  | 0.18211644<br>1  | 0.62089425<br>5  | 4 | -0.162900612 | 0.379445<br>51  | NM_010438 | 1.0337840<br>23 | 0.3673657<br>28 | 0.3993872<br>88 | 0.2693927<br>47 | 4 | 0.5174824<br>47       | 0.348615<br>028 |
| NP_034600.1 | heterochromatin protein 1, binding protein 3 [Mus musculus]                               | 0.22798045<br>1 | 0.42405093<br>4  | 0.52455284<br>2  | 0.670764<br>163  | 2 | 0.050250954  | 0.670764<br>163 | NM_010470 | 0.1941666<br>97 | 0.6794813<br>77 | 0.8256705<br>08 | 0.6527383<br>81 | 4 | 0.5880142<br>41       | 0.273344<br>618 |
| NP_034607.2 | heat shock protein 1 (chaperonin) [Mus musculus]                                          | 0.22798045<br>1 | 0.13269892<br>7  | 0.42622273<br>7  | 0.05596288<br>4  | 4 | 0.096726024  | 0.268922<br>58  | NM_010477 | 1.3071787<br>05 | 1.8753710<br>73 | 2.1649760<br>7  | 2.0206399<br>24 | 4 | 1.8420414<br>43       | 0.375665<br>278 |
| NP_034611.1 | heat shock protein 9A [Mus musculus]                                                      | 0.16739837<br>4 | 0.38482044<br>5  | 0.07538457<br>7  | 0.51719001<br>6  | 4 | 0.06011018   | 0.500138<br>388 | NM_010481 | 0.8670232<br>33 | 1.4860255<br>34 | 1.6697985<br>74 | 1.6141828<br>74 | 4 | 1.4092575<br>49       | 0.369588<br>682 |
| NP_034615.2 | ELAV (embryonic lethal, abnormal vision, Drosophila)-like 1 (Hu antigen R) [Mus musculus] | 0.60094890<br>2 | 0.44029510<br>7  | 0.25311105<br>8  | 0.311222<br>701  | 3 | -0.17533593  | 0.311222<br>701 | NM_010485 | 0.7815389<br>5  | 0.3920018<br>4  | 0.4342457<br>3  | 0.2896480<br>14 | 4 | 0.4743586<br>34       | 0.213595<br>76  |
| NP_034627.2 | isocitrate dehydrogenase 1 (NADP+), soluble [Mus musculus]                                | 0.19237334<br>7 | 0.81268275<br>2  | 0.34941209<br>6  | 0.17997496<br>1  | 4 | 0.01057418   | 0.625999<br>306 | NM_010497 | 0.6544198<br>35 | 2.2628334<br>78 | 1.5946074<br>34 | 1.8037398<br>29 | 4 | 1.5789001<br>44       | 0.676566<br>885 |
| NP_034708.1 | integrin beta 1 (fibronectin receptor beta) [Mus musculus]                                | 0.19237334<br>7 | 0.91289184<br>2  | 0.23565357<br>6  | 1.39632594<br>7  | 4 | -0.588124505 | 0.705236<br>614 | NM_010578 | 0.5348304<br>23 | 1.3845783<br>21 | 1.1538856<br>64 | 1.0178931<br>57 | 4 | 1.0227968<br>91       | 0.358796<br>781 |
| NP_034709.1 | integrin beta 4 binding protein [Mus musculus]                                            | 0.03981810<br>6 | 0.03981810<br>6  | 0.11573401<br>2  | 0.11573401<br>2  | 2 | -0.077776059 | 0.053680<br>652 | NM_010579 | 0.5697106<br>68 | 0.3147403<br>78 | 0.6019571<br>31 | 0.3643019<br>52 | 4 | 0.1778221<br>98       | 0.513879<br>725 |
| NP_034723.1 | junction plakoglobin [Mus musculus]                                                       | 0.31377149<br>1 | 0.44138836<br>3  | 0.2139821<br>2   | 0.327685231<br>2 | 2 | 0.327685231  | 0.160800<br>511 | NM_010593 | 0.2155931<br>33 | 0.4905452<br>45 | 0.1947623<br>12 | 0.2272085<br>71 | 4 | 0.1742307<br>49       | 0.291688<br>026 |
| NP_034743.2 | KH-type splicing regulatory protein [Mus musculus]                                        | 1.48112292<br>5 | 0.31377149<br>1  | 0.14683901<br>9  | 0.31222915<br>2  | 3 | 0.048432226  | 0.324395<br>012 | NM_010613 | 0.0066438<br>56 | 0.2901237<br>11 | 0.7008992<br>46 | 0.1162387<br>16 | 4 | 0.2170200<br>96       | 0.365426<br>766 |
| NP_034769.4 | kallikrein 6 [Mus musculus]                                                               | 0.13507089<br>2 | 1.48112292<br>5  | 0.93677718<br>8  | 1.05686505<br>3  | 3 | 0.453678353  | 1.336182<br>662 | NM_010639 | 3.5544630<br>62 | 2.3601266<br>03 | 2.6654114<br>01 | 2.5069625<br>37 | 4 | -2.7717409<br>7855952 | 0.536499<br>101 |
| NP_034794.1 | keratin complex 1, acidic, gene 18 [Mus musculus]                                         | 0.13507089<br>2 | 0.06457341<br>6  | 0.46773698<br>6  | -0.25378831<br>4 | 4 | 0.103398246  | 0.295992<br>948 | NM_010664 | 0.6809952<br>59 | 0.8712240<br>9  | 0.7314640<br>54 | 0.8586975<br>14 | 4 | 0.7855952<br>29       | 0.094070<br>158 |
| NP_034813.1 | laminin, gamma 1 [Mus musculus]                                                           | 0.95895396<br>4 | 0.41693792<br>4  | 0.61990501<br>1  | 1.40657468<br>5  | 4 | -0.061163409 | 1.071012<br>083 | NM_010683 | 1.5579842<br>77 | 1.1134565<br>79 | 0.3513018<br>79 | 0.8529827<br>28 | 4 | 0.9688913<br>65       | 0.504242<br>382 |
| NP_034818.1 | LIM and SH3 protein 1 [Mus musculus]                                                      | 0.41054907<br>2 | 0.06571493<br>1  | 0.19951598<br>6  | 0.07376257<br>4  | 4 | 0.241041922  | 0.537326<br>544 | NM_010688 | 0.7719994<br>8  | 0.4028324<br>47 | 0.5742119<br>22 | 0.5074718<br>71 | 4 | 0.5641289<br>3        | 0.155497<br>492 |
| NP_034829.1 | lactate dehydrogenase 1, A chain [Mus musculus]                                           | 0.82714465<br>5 | 0.41054907<br>2  | 0.29586755<br>7  | 0.29334281<br>3  | 4 | -0.140240621 | 0.309224<br>034 | NM_010699 | 0.1194399<br>25 | 0.3201143<br>5  | 0.0777345<br>82 | 0.2342022<br>87 | 4 | 0.0278156<br>11       | 0.241203<br>674 |
| NP_034835.1 | galectin-3 [Mus musculus]                                                                 | 0.41119732<br>2 | 0.82714465<br>5  | 0.02691968<br>2  | 0.58669281<br>6  | 3 | -0.071771386 | 0.712005<br>179 | NM_010705 | 0.7872969<br>58 | 0.0033865<br>13 | 0.2009906<br>88 | 0.4080894<br>42 | 4 | -0.3499409<br>88      | 0.335135<br>636 |
| NP_034836.1 | lectin, galactose binding, soluble 4 [Mus musculus]                                       | 0.86164376<br>8 | 0.41119732<br>2  | 0.59210408<br>4  | 0.18998892<br>3  | 4 | 0.002533509  | 0.430546<br>112 | NM_010706 | 0.6942829<br>72 | 0.5315856<br>72 | 0.5004010<br>95 | 0.6255622<br>3  | 4 | 0.5879579<br>92       | 0.088624<br>919 |
| NP_034851.1 | lamin B1 [Mus musculus]                                                                   | 0.034851.1      | 0.86164376<br>8  | 0.00174239<br>9  | 0.59010596<br>7  | 4 | 0.383275285  | 0.412295<br>555 | NM_010721 | 2.2057602<br>55 | 1.7745285<br>78 | 2.2594738<br>62 | 1.9770597<br>87 | 4 | 2.0542056<br>2        | 0.223065<br>451 |
| NP_034852.1 | lamin B2 [Mus musculus]                                                                   | 0.034852.1      | 0.034851.1       | 0.23516094<br>3  | 0.53677406<br>8  | 2 | 0.150806563  | 0.545840<br>481 | NM_010722 | 0.1431751<br>01 | 0.0691612<br>09 | 0.1403005<br>35 | 0.0311189<br>17 | 4 | 0.0803794<br>35       | 0.081836<br>352 |
| NP_034860.1 | annexin A1 [Mus musculus]                                                                 | 0.034860.1      | 0.034851.1       | 0.96093452<br>3  | 0.24368606<br>2  | 2 | 0.602310292  | 0.507171<br>251 | NM_010730 | 1.4649702<br>9  | 2.0923095<br>41 | 2.2150253<br>12 | 2.1279650<br>74 | 4 | 1.9750670<br>54       | 0.343948<br>31  |
| NP_034869.1 | lymphocyte antigen 64 [Mus musculus]                                                      | 0.034869.1      | -0.08533027<br>7 | 0.35371982<br>7  | 0.18170653<br>7  | 3 | 0.02889434   | 0.285404<br>615 | NM_010739 | 0.9500714<br>35 | 0.2617305<br>85 | 0.1014642<br>14 | 0.2284705<br>68 | 4 | 0.2545689<br>08       | 0.508071<br>879 |
| NP_034901.2 | matrin 3 [Mus musculus]                                                                   | 0.034901.2      | 0.034869.1       | 0.18865544<br>7  | 1.40715678<br>8  | 2 | 0.60925067   | 1.128409<br>653 | NM_010771 | 0.5386506<br>41 | 0.5167767<br>71 | 0.5426064<br>32 | 0.0127218<br>95 | 4 | 0.4026889<br>35       | 0.260226<br>067 |
| NP_035010.2 | nucleolin [Mus musculus]                                                                  | 0.035010.2      | 0.27339269<br>5  | 0.76345027<br>9  | 0.45659098<br>6  | 4 | 0.312492347  | 0.434922<br>55  | NM_010880 | 1.2311896<br>79 | 1.7633813<br>79 | 2.0290311<br>17 | 1.8056001<br>26 | 4 | 1.7073005<br>55       | 0.338132<br>154 |
| NP_035016.1 | NADH dehydrogenase (ubiquinone) 1 alpha subcomplex, 4 [Mus musculus]                      | 0.035016.1      | 0.22207709<br>8  | 0.03494940<br>4  | 0.26858189<br>7  | 3 | 0.15188833   | 0.163506<br>664 | NM_010886 | 1.0663389<br>18 | 0.1527992<br>81 | 0.1382672<br>61 | 0.3895825<br>06 | 4 | 0.3676133<br>61       | 0.513407<br>032 |
| NP_035020.2 | neural precursor cell expressed, developmentally down-regulated gene 4 [Mus musculus]     | 0.035020.2      | 0.035016.1       | 0.06376183<br>-  | 0.7379519<br>-   | 2 | 0.400856865  | 0.476724<br>37  | NM_010890 | 1.3702953<br>39 | 1.9923743<br>34 | 1.4486900<br>33 | 1.2459735<br>06 | 4 | 1.5143333<br>03       | 0.329442<br>044 |
| NP_035021.1 | septin 2 [Mus musculus]                                                                   | 0.035021.1      | 0.035016.1       | 0.34548205<br>9  | 0.68592377<br>1  | 2 | -0.515702915 | 0.240728<br>643 | NM_010891 | 0.6876391<br>16 | 0.9780585<br>65 | 0.6466708<br>33 | 0.6651168<br>73 | 4 | 0.7443713<br>47       | 0.156689<br>634 |
| NP_035047.1 | nidogen 1 [Mus musculus]                                                                  | 0.035047.1      | 0.035021.1       | 1.12481341<br>1  | 0.37941656<br>5  | 4 | -0.442285411 | 0.802504<br>157 | NM_010917 | 0.4883234<br>3  | 0.0362611<br>71 | 0.8588040<br>75 | 0.4597103<br>89 | 4 | 0.2127889<br>89       | 0.579521<br>671 |
| NP_035086.1 | oxoglutarate dehydrogenase (lipamide) [Mus musculus]                                      | 0.035086.1      | 0.035047.1       | 0.10769568<br>8  | 0.27643184<br>3  | 2 | -0.267819649 | 0.124042<br>053 | NM_010956 | 0.9533933<br>63 | 0.2316718<br>5  | 0.4219085<br>85 | 0.5405612<br>16 | 4 | 0.5368837<br>54       | 0.305432<br>684 |
| NP_035162.1 | prolyl 4-hydroxylase, beta polypeptide [Mus musculus]                                     | 0.035162.1      | 0.035086.1       | 0.31955692<br>4  | 0.26013466<br>6  | 4 | 0.102433322  | 0.251852<br>116 | NM_011032 | 0.1916752<br>51 | 1.4075315<br>29 | 1.1491293<br>56 | 1.0639312<br>05 | 4 | 0.9530668<br>35       | 0.528200<br>316 |

|             |                                                                          |                  |                 |                 |                 |   |                        |           |                 |                 |                  |                 |   |                 |                  |
|-------------|--------------------------------------------------------------------------|------------------|-----------------|-----------------|-----------------|---|------------------------|-----------|-----------------|-----------------|------------------|-----------------|---|-----------------|------------------|
| NP_035164.1 | peroxiredoxin 1 [Mus musculus]                                           | 0.14616962<br>8  | 0.19106625<br>2 | 0.03035908<br>8 | -               | 3 | 0.102292264<br>179     | NM_011034 | 0.9367837<br>23 | 1.2113185<br>5  | 1.1742219<br>62  | 1.4053613<br>7  | 4 | 1.1819214<br>01 | 0.192303<br>037  |
| NP_035182.1 | programmed cell death 6 interacting protein [Mus musculus]               | -                | -               | 0.38271757<br>8 | -0.14166538     | 2 | -0.262191479<br>170449 | NM_011052 | 0.5813374<br>17 | 0.5071818<br>76 | 0.2441979<br>72  | 0.1590694<br>29 | 4 | 0.0027432<br>51 | 0.476127<br>531  |
| NP_035202.1 | profilin 1 [Mus musculus]                                                | 0.12426333<br>8  | 0.19825132<br>1 | 0.27858280<br>9 | 0.11601589<br>7 | 4 | 0.179278341<br>06      | NM_011072 | 0.4650699<br>33 | 1.0258637<br>73 | 0.7982834<br>78  | 0.7098941<br>27 | 4 | 0.5172428<br>61 | 0.668264<br>418  |
| NP_035212.2 | polymeric immunoglobulin receptor [Mus musculus]                         | -                | -               | 0.34861957<br>1 | 0.11717036<br>3 | 2 | -0.232894967<br>304    | NM_011082 | 2.2157260<br>39 | 0.0016775<br>5  | 0.4086835<br>09  | 0.3244428<br>11 | 4 | 0.7367937<br>02 | 1.001710<br>238  |
| NP_035229.2 | pyruvate kinase 3 [Mus musculus]                                         | 0.23864585<br>3  | 0.08471709<br>3 | 0.00028026<br>6 | 0.37189752<br>1 | 4 | 0.054422124<br>32      | NM_011099 | 0.252051<br>46  | 0.9184984<br>72 | 0.3658028<br>09  | 0.1726594<br>82 | 4 | 0.4330041<br>02 | 0.333140<br>527  |
| NP_035249.1 | proliferation-associated 2G4 [Mus musculus]                              | 0.23376700<br>8  | -               | -               | 0.24284353<br>5 | 2 | 0.004538263<br>547     | NM_011119 | 0.5846593<br>45 | 2.2602349<br>71 | 2.4565953<br>75  | 2.1048729<br>5  | 4 | 1.8515906<br>6  | 0.856793<br>976  |
| NP_035281.1 | protein phosphatase 1B, magnesium dependent, beta isoform [Mus musculus] | -                | 0.37363188<br>6 | 0.13477005<br>3 | 1.42459627<br>9 | 3 | -0.305398114<br>427    | NM_011151 | 0.6660465<br>83 | 0.3818122<br>42 | 0.4468331<br>06  | 0.5714306<br>58 | 4 | 0.5165306<br>47 | 0.126985<br>33   |
| NP_035305.1 | legumain [Mus musculus]                                                  | -                | 0.33852958<br>2 | 0.34286657<br>1 | 0.25316450<br>2 | 3 | 0.082942504<br>417     | NM_011175 | 0.371223<br>94  | 1.1772376<br>38 | 1.6418741<br>26  | 1.8018935<br>71 | 4 | 1.2407909<br>82 | 0.655052<br>924  |
| NP_035315.1 | proteasome (prosome, macropain) subunit, beta type 1 [Mus musculus]      | 0.09144288<br>6  | 0.10974764<br>3 | 0.19473224<br>1 | 0.06710327<br>4 | 4 | 0.060882689<br>104     | NM_011185 | 0.126495<br>11  | 0.1242401<br>63 | 0.0674149<br>53  | 0.1110606<br>53 | 4 | 0.0324449<br>59 | 0.139057<br>508  |
| NP_035316.1 | proteasome (prosome, macropain) subunit, beta type 5 [Mus musculus]      | -                | 1.55266066<br>5 | 0.28131947<br>4 | 0.09131362<br>3 | 3 | -0.393342523<br>749    | NM_011186 | 1.008483<br>95  | 1.3021513<br>69 | 1.2307517<br>57  | 1.0923220<br>1  | 4 | 1.0391834<br>08 | 0.349479<br>665  |
| NP_035351.1 | purine rich element binding protein B [Mus musculus]                     | 0.03550689<br>9  | 0.55172819<br>5 | 0.11161856<br>7 | 0.29432909<br>4 | 4 | -0.083377692<br>417    | NM_011221 | 0.354469<br>417 | 0.5577095<br>79 | 0.1247473<br>96  | 0.0042880<br>05 | 4 | 0.3103767<br>43 | 0.288123<br>962  |
| NP_035370.1 | RAN binding protein 2 [Mus musculus]                                     | -                | -               | 0.39107574<br>9 | 0.14031548<br>8 | 2 | -0.12538013<br>347     | NM_011240 | 0.8637013<br>05 | 0.6642868<br>1  | 0.7099217<br>27  | 0.5105877<br>41 | 4 | 0.6871243<br>96 | 0.145356<br>881  |
| NP_035420.1 | ribosomal protein L6 [Mus musculus]                                      | 0.05179216<br>4  | 0.44656822<br>5 | 0.34505838<br>3 | 0.33250589<br>9 | 4 | 0.121451976<br>081     | NM_011290 | 0.352481<br>081 | 1.0983662<br>67 | 0.9416159<br>51  | 0.8149176<br>01 | 4 | 0.8698555<br>75 | 0.200477<br>094  |
| NP_035449.1 | seryl-aminoacyl-tRNA synthetase 1 [Mus musculus]                         | -                | -               | 0.33572985<br>6 | 0.49676854<br>6 | 2 | 0.416249201<br>55      | NM_011319 | 0.1182606<br>4  | 0.6823294<br>22 | 0.5741347<br>36  | 0.4876355<br>68 | 4 | 0.4656900<br>92 | 0.244868<br>419  |
| NP_035488.1 | splicing factor, arginine/serine-rich 2 [Mus musculus]                   | 0.19551208<br>6  | 0.30133650<br>6 | 0.70270717<br>1 | 0.44246547<br>5 | 4 | 0.410505308<br>934     | NM_011358 | 1.0796266<br>31 | 1.7093057<br>89 | 1.8210218<br>37  | 1.3470650<br>21 | 4 | 1.4892548<br>19 | 0.339855<br>349  |
| NP_035520.1 | solute carrier family 12, member 7 [Mus musculus]                        | -                | -               | 0.18310318<br>8 | -               | 2 | -0.402085329<br>644    | NM_011390 | 0.318464<br>02  | 1.1390886<br>99 | 0.9533109<br>63  | 1.2580880<br>46 | 4 | 0.7914471<br>26 | 0.662739<br>257  |
| NP_035564.1 | superoxide dismutase 1, soluble [Mus musculus]                           | 0.42563655<br>3  | 0.12276343<br>2 | 0.13760598<br>6 | 0.40846573<br>3 | 4 | -0.273617926<br>404    | NM_011434 | 0.165881<br>404 | 0.3215626<br>4  | 0.7272529<br>65  | 0.6765415<br>34 | 4 | 0.5361010<br>06 | 0.196630<br>78   |
| NP_035597.1 | sepiapterin reductase [Mus musculus]                                     | 0.10404513<br>9  | 0.06108734<br>9 | 0.11091429<br>1 | 0.48665534<br>1 | 4 | 0.052652141<br>352     | NM_011467 | 1.3619905<br>19 | 0.2503909<br>51 | 0.2159333<br>52  | 0.4000617<br>07 | 4 | 0.1239011<br>27 | 0.829253<br>565  |
| NP_035636.1 | succinate-Coenzyme A ligase, ADP-forming, beta subunit [Mus musculus]    | -                | -               | 0.40370591<br>1 | 0.10715393<br>1 | 2 | -0.255429921<br>916    | NM_011506 | 0.209693<br>916 | 0.4038135<br>79 | 0.9799856<br>65  | 0.9401614<br>21 | 4 | 0.5076804<br>38 | 0.294693<br>287  |
| NP_035642.1 | surfeit gene 4 [Mus musculus]                                            | 0.06289143<br>4  | 0.24954145<br>9 | 0.02861289<br>6 | 0.01579120<br>2 | 4 | 0.043457083<br>917     | NM_011512 | 0.4275321<br>46 | 0.0945675<br>44 | 0.2336359<br>96  | 0.2179626<br>18 | 4 | 0.0296585<br>03 | 0.311074<br>338  |
| NP_035656.1 | transgelin [Mus musculus]                                                | 0.95135311<br>2  | 1.82088823<br>1 | 0.88619177<br>4 | 1.76748112<br>6 | 4 | -0.880802005<br>552    | NM_011526 | 1.294447<br>03  | 3.4647710<br>66 | 3.2428896<br>63  | 3.8741382<br>76 | 4 | 3.3855621<br>02 | 0.385597<br>754  |
| NP_035693.2 | peroxiredoxin 2 [Mus musculus]                                           | 0.01283722<br>8  | 0.53711931<br>5 | -               | 0.19225760<br>7 | 3 | 0.110674827<br>436     | NM_011563 | 0.380051<br>07  | 0.5802301<br>57 | 0.0823137<br>57  | 0.3040368<br>39 | 4 | 0.1311335<br>54 | 0.362703<br>701  |
| NP_035698.1 | THO complex 4 [Mus musculus]                                             | 0.01425259<br>4  | 0.65816639<br>6 | 0.09239256<br>7 | -               | 3 | 0.245435456<br>95      | NM_011568 | 1.7304464<br>66 | 0.9957435<br>05 | 1.3196618<br>2   | 1.1758307<br>81 | 4 | 1.3063206<br>43 | 0.314437<br>661  |
| NP_035718.1 | tripartite motif protein 28 [Mus musculus]                               | 0.19573475<br>2  | 0.14509442<br>1 | 0.54879008<br>1 | 0.17549849<br>6 | 3 | 0.461571894<br>795     | NM_011588 | 1.1261336<br>24 | 1.5444801<br>04 | 1.4041425<br>01  | 1.1083934<br>55 | 4 | 1.2957874<br>21 | 0.1214077<br>699 |
| NP_035727.1 | tight junction protein 2 [Mus musculus]                                  | -0.33570618<br>2 | -               | -               | -               | 3 | -0.05037754<br>48      | NM_011597 | 0.4844770<br>47 | 0.6433367<br>2  | 0.5065699<br>41  | 0.4124019<br>35 | 4 | 0.096535<br>11  | 0.296535<br>535  |
| NP_035732.1 | talin 1 [Mus musculus]                                                   | 0.61829729<br>3  | 0.91955132<br>1 | 0.54783863<br>5 | 0.58424361<br>4 | 4 | -0.358334069<br>216    | NM_011602 | 0.672240<br>95  | 0.5315084<br>37 | 0.2648828<br>99  | 0.1650656<br>5  | 4 | 0.2616557<br>7  | 0.194344<br>342  |
| NP_035735.1 | thymopoietin [Mus musculus]                                              | 0.21290095<br>6  | 0.52061543<br>3 | 0.31623777<br>8 | 0.00762253<br>3 | 4 | 0.264344175<br>445     | NM_011605 | 0.213635<br>76  | 1.1933123<br>25 | 0.9028613<br>66  | 0.4012683<br>98 | 4 | 0.9399436<br>91 | 0.391440<br>286  |
| NP_035737.1 | tenascin C [Mus musculus]                                                | 0.17241654<br>5  | 1.03441060<br>4 | 2.13725374<br>6 | 0.51831502<br>5 | 4 | -0.96559898<br>018     | NM_011607 | 0.857654<br>018 | 0.7799887<br>17 | 0.1960956<br>69  | 0.6784535<br>21 | 4 | 0.0932285<br>92 | 0.655972<br>951  |
| NP_035761.1 | tumor rejection antigen gp96 [Mus musculus]                              | 0.44115056<br>6  | 0.11298747<br>8 | 0.66282740<br>2 | 0.14700372<br>9 | 4 | 0.340992294<br>75      | NM_011631 | 0.260273<br>75  | 0.8304820<br>24 | 0.7254031<br>58  | 1.0629673<br>59 | 4 | 0.9257113<br>24 | 0.176147<br>866  |
| NP_035785.1 | tubulin, beta 5 [Mus musculus]                                           | 0.61145403<br>6  | 0.44782609<br>4 | 0.33635807<br>9 | 0.83045785<br>7 | 4 | 0.250796999<br>44      | NM_011655 | 0.612542<br>83  | 1.7294289<br>04 | 1.7292368<br>65  | 1.6325184<br>93 | 4 | 1.8250666<br>11 | 0.260046<br>565  |
| NP_035790.1 | thioredoxin 1 [Mus musculus]                                             | -                | 0.13220291<br>2 | 0.43368431<br>5 | 0.00146975<br>5 | 3 | -0.189118994<br>25     | NM_011660 | 0.221657<br>25  | 0.6444540<br>5  | 0.7611776<br>01  | 0.1900164<br>26 | 4 | 0.4125437<br>21 | 0.343036<br>68   |
| NP_035800.1 | ubiquitin carboxy-terminal hydrolase L1 [Mus musculus]                   | 0.12656163<br>6  | 1.22320091<br>9 | -               | -               | 2 | -0.674881277<br>074    | NM_011670 | 0.775441<br>074 | 2.6566151<br>45 | 0.37094473<br>83 | 2.3481519<br>34 | 4 | 2.6181701<br>91 | 0.336614<br>715  |
| NP_035820.2 | valyl-tRNA synthetase 2 [Mus musculus]                                   | 0.33911042<br>3  | 0.16237077<br>9 | 0.51388683<br>1 | 0.07879076<br>3 | 4 | 0.19235431<br>595      | NM_011690 | 0.296449<br>595 | 1.2457230<br>36 | 1.2831967<br>05  | 1.4347992<br>08 | 4 | 1.3430449<br>63 | 0.092648<br>905  |
| NP_035824.1 | voltage-dependent anion channel 1 [Mus musculus]                         | 0.54834884<br>2  | 0.15517185<br>5 | 0.17225487<br>5 | 0.36356447<br>7 | 4 | -0.232249085<br>777    | NM_011694 | 0.300475<br>777 | 0.2881772<br>62 | 0.0814260<br>37  | 0.1923344<br>28 | 4 | 0.0167486<br>64 | 0.209900<br>469  |
| NP_035825.1 | voltage-dependent anion channel 2 [Mus musculus]                         | 0.11761953<br>2  | 0.09957936<br>8 | 0.49206277<br>8 | 0.07883245<br>8 | 4 | 0.157607305<br>723     | NM_011695 | 0.239951<br>723 | 0.7175384<br>68 | 0.9019462<br>31  | 0.4249975<br>01 | 4 | 0.6008282<br>32 | 0.254146<br>37   |
| NP_035826.1 | voltage-dependent anion channel 3 [Mus musculus]                         | 0.51526809<br>1  | 0.03178599<br>5 | 0.19434060<br>4 | 0.08688878<br>5 | 4 | -0.207070869<br>435    | NM_011696 | 0.216268<br>435 | 0.2564528<br>49 | 1.1419103<br>94  | 1.2431019<br>35 | 4 | 0.8966175<br>54 | 0.444361<br>79   |
| NP_035831.2 | vimentin [Mus musculus]                                                  | 0.20660903<br>1  | 0.73352699<br>1 | 0.04038781<br>5 | 0.21186206<br>2 | 4 | -0.19479196<br>489     | NM_011701 | 0.398116<br>489 | 2.9631598<br>61 | 2.2764462<br>61  | 1.7607904<br>52 | 4 | 2.3095227<br>75 | 0.494840<br>7    |
| NP_035840.2 | tryptophanyl-tRNA synthetase [Mus musculus]                              | 0.80448822<br>5  | -               | 0.17505878<br>6 | 0.08415927<br>3 | 3 | -0.181756722<br>058    | NM_011710 | 0.541213<br>058 | 0.1066072<br>13 | 1.8758415<br>18  | 0.8070221<br>82 | 4 | 0.5171531<br>29 | 1.100193<br>724  |
| NP_035845.1 | WD repeat domain 1 [Mus musculus]                                        | 0.90982171<br>7  | -               | -               | 0.81715499<br>8 | 2 | 0.863488354<br>271     | NM_011715 | 0.065525<br>86  | 0.4949672<br>05 | 0.1220214<br>05  | 0.2280665<br>48 | 4 | 0.0257995<br>17 | 0.321958<br>106  |
| NP_035862.1 | nuclease sensitive element binding protein 1 [Mus musculus]              | 0.06444918<br>1  | 0.11383678<br>7 | 0.27394558<br>5 | 0.17620402<br>8 | 4 | 0.157108895<br>157     | NM_011732 | 0.090321<br>157 | 0.3373417<br>98 | 1.0350470<br>74  | 1.2381964<br>68 | 4 | 0.8916520<br>05 | 0.388183<br>204  |

|             |                                                                                                      |                 |                  |                  |                  |   |              |                 |           |                 |                 |                 |                 |   |                   |                 |
|-------------|------------------------------------------------------------------------------------------------------|-----------------|------------------|------------------|------------------|---|--------------|-----------------|-----------|-----------------|-----------------|-----------------|-----------------|---|-------------------|-----------------|
| NP_035869.1 | tyrosine 3-monooxygenase/tryptophan 5-monooxygenase activation protein, theta polypeptide [Mus muscu | 0.32220235<br>7 | 0.07200061<br>9  |                  |                  | 2 | 0.197101488  | 0.176919<br>345 | NM_011739 | 1.4234461<br>89 | 1.3850366<br>74 | 1.0951813<br>15 | 0.9608789<br>79 | 4 | 1.2161357<br>89   | 0.224567<br>091 |
| NP_035870.1 | tyrosine 3-monooxygenase/tryptophan 5-monooxygenase activation protein, zeta polypeptide [Mus muscu  | 0.07804647<br>9 | 0.30116975<br>4  | 0.02429627<br>8  | 0.10276205<br>8  | 4 | 0.114420502  | 0.136108<br>554 | NM_011740 | 0.2551240<br>78 | 1.1315187<br>4  | 1.0155573<br>34 | 0.8699712<br>21 | 4 | 0.8180428<br>43   | 0.390236<br>341 |
| NP_035913.1 | anterior gradient 2 [Mus musculus]                                                                   | 0.38287540<br>1 | 1.45997250<br>4  | 0.48634850<br>4  | 0.45356845<br>9  | 4 | -0.261079265 | 0.903276<br>069 | NM_011783 | 2.5911039<br>14 | 1.2732520<br>5  | 1.1419077<br>9  | 0.5527312<br>04 | 4 | 1.3897487<br>39   | 0.860009<br>54  |
| NP_035924.2 | bisphosphate 3'-nucleotidase 1 [Mus musculus]                                                        | 1.91049747<br>2 |                  | 1.65528085<br>2  | 2.19465432<br>7  | 3 | -0.457041332 | 2.299978<br>54  | NM_011794 | 0.6311663<br>38 | 0.2196041<br>95 | 0.0064768<br>56 | 0.0293895<br>21 | 4 | -0.2184208<br>886 | 0.292501<br>886 |
| NP_035972.3 | metastasis-associated protein 2 [Mus musculus]                                                       | 0.51657159<br>1 |                  | 0.47981945<br>5  | 0.32676023<br>9  | 3 | 0.223210269  | 0.476642<br>79  | NM_011842 | 0.5040361<br>5  | 1.0090373<br>61 | 1.0595125<br>36 | 0.6121545<br>78 | 4 | 0.7961851<br>56   | 0.279204<br>624 |
| NP_035973.1 | membrane bound C2 domain containing protein [Mus musculus]                                           |                 | 0.22050851<br>-  |                  | 0.15708767<br>4  | 2 | 0.031710418  | 0.267000<br>822 | NM_011843 | 0.5713716<br>32 | 0.3601496<br>62 | 0.4630214<br>16 | 0.7014930<br>87 | 4 | 0.2383231<br>08   | 0.558409<br>353 |
| NP_035992.1 | protein kinase C and casein kinase substrate in neurons 2 [Mus musculus]                             |                 |                  | -0.19489322<br>- | 0.97436186<br>5  | 2 | 0.389734322  | 0.826788<br>2   | NM_011862 | 1.0087588<br>31 | 0.1941890<br>89 | 0.3206409<br>19 | 0.7900326<br>44 | 4 | 0.5784053<br>71   | 0.384731<br>451 |
| NP_036095.1 | proteasome (prosome, macropain) subunit, alpha type 1 [Mus musculus]                                 | 0.49403393<br>8 |                  | 0.46452257<br>3  | 0.57879062<br>3  | 3 | 0.183093086  | 0.589185<br>923 | NM_011965 | 0.2939906<br>36 | 0.5547078<br>81 | 0.2847606<br>23 | 0.0490601<br>48 | 4 | 0.1241044<br>3    | 0.372388<br>328 |
| NP_036098.1 | proteasome (prosome, macropain) subunit, alpha type 6 [Mus musculus]                                 | 0.09127690<br>7 | 0.33697065<br>2  | 0.38440517<br>-  | 0.18609647<br>8  | 4 | 0.11100061   | 0.291544<br>958 | NM_011968 | 0.2132677<br>84 | 0.0238196<br>73 | 0.0317608<br>12 | 0.1774005<br>31 | 4 | 0.0996523<br>63   | 0.113736<br>315 |
| NP_036149.1 | programmed cell death 8 [Mus musculus]                                                               | 0.88641303<br>3 | 0.66486050<br>9  | 0.12150071<br>3  | 0.30612729<br>9  | 4 | -0.494725389 | 0.345075<br>387 | NM_012019 | 0.1260671<br>71 | 0.3197166<br>36 | 0.4919207<br>97 | 0.6826929<br>19 | 4 | 0.4050993<br>81   | 0.237869<br>234 |
| NP_036151.1 | peroxiredoxin 5 precursor [Mus musculus]                                                             |                 | 1.10420750<br>4  |                  | 0.87330766<br>9  | 2 | 0.988757587  | 0.163270<br>839 | NM_012021 | 1.1992160<br>42 | 0.3049980<br>05 | 0.3719615<br>77 | 0.5742405<br>49 | 4 | 0.6126040<br>43   | 0.407478<br>288 |
| NP_036160.1 | solute carrier family 9 (sodium/hydrogen exchanger), isoform 3 regulator 1 [Mus musculus]            | 0.20362449<br>9 | 0.69118088<br>3  | 0.07528350<br>1  | 0.36022135<br>4  | 4 | -0.294935809 | 0.319725<br>118 | NM_012030 | 1.9233983<br>67 | 0.5629657<br>62 | 0.5464336<br>69 | 1.0951431<br>61 | 4 | 1.0319847<br>4    | 0.646617<br>434 |
| NP_036182.1 | ribosomal protein S3 [Mus musculus]                                                                  | 0.18519400<br>6 | 0.70627524<br>3  | 0.46618714<br>-  | 0.14132557<br>-  | 4 | 0.282148487  | 0.388155<br>395 | NM_012052 | 0.2876789<br>73 | 0.2431903<br>33 | 0.0475928<br>32 | 0.1909935<br>08 | 4 | 0.0247280<br>09   | 0.243720<br>078 |
| NP_036183.1 | ribosomal protein L8 [Mus musculus]                                                                  | 0.21463939<br>9 |                  | 0.50885522<br>2  |                  | 2 | 0.36174731   | 0.208042<br>003 | NM_012053 | 0.3687340<br>19 | 0.2393773<br>94 | 0.1270479<br>34 | 0.2407706<br>91 | 4 | 0.0596155<br>-    | 0.290494<br>971 |
| NP_038498.1 | annexin A3 [Mus musculus]                                                                            | 0.06881191<br>9 | 1.37422026<br>8  | 0.20653717<br>9  | 1.00240273<br>3  | 4 | 0.024117109  | 0.989673<br>133 | NM_013470 | 0.8304820<br>24 | 0.6833559<br>94 | 0.9002227<br>52 | 0.9413249<br>71 | 4 | 0.8388464<br>35   | 0.113308<br>051 |
| NP_038499.1 | annexin A4 [Mus musculus]                                                                            | 0.01532769<br>1 | 0.43831783<br>1  | 0.15140263<br>2  | 0.29056992<br>6  | 4 | -0.004745605 | 0.316027<br>961 | NM_013471 | 0.1566289<br>1  | 1.3383429<br>49 | 1.2500688<br>57 | 0.9160312<br>03 | 4 | 0.8369535<br>25   | 0.686904<br>885 |
| NP_038539.1 | erythrocyte protein band 4.1-like 2 [Mus musculus]                                                   |                 |                  | 0.16021145<br>8  | 1.19637723<br>7  | 2 | 0.518082889  | 0.959253<br>066 | NM_013511 | 0.8886157<br>65 | 2.2602074<br>12 | 1.7057535<br>73 | 1.6172836<br>01 | 4 | 1.6179650<br>88   | 0.563362<br>796 |
| NP_038556.1 | glutamine fructose-6-phosphate transaminase 1 [Mus musculus]                                         | 0.10606079<br>6 | 0.03277255<br>1  | 0.20775007<br>-  | 0.30142776<br>-  | 4 | -0.041741484 | 0.215539<br>875 | NM_013528 | 1.8038069<br>56 | 0.7763967<br>11 | 0.6968915<br>97 | 0.0317785<br>57 | 4 | 0.4787726<br>57   | 1.068888<br>625 |
| NP_038569.1 | glutathione S-transferase, pi 1 [Mus musculus]                                                       | 0.75241397<br>9 |                  | 0.52233538<br>9  | 0.55021099<br>8  | 3 | -0.24151279  | 0.695236<br>619 | NM_013541 | 0.1445537<br>01 | 0.2138657<br>14 | 0.0134120<br>32 | 0.0525545<br>5  | 4 | 0.0075423<br>74   | 0.152040<br>159 |
| NP_038588.1 | heat shock protein 1 [Mus musculus]                                                                  | 1.03627764<br>4 | 1.85867184<br>2  | 0.74288279<br>-  | 1.37474201<br>5  | 4 | -0.735004753 | 1.266148<br>344 | NM_013560 | 0.8803109<br>45 | 1.4628693<br>63 | 0.3857056<br>5  | 0.3887352<br>05 | 4 | 0.3921848<br>63   | 0.930874<br>53  |
| NP_038632.1 | metaxin 1 [Mus musculus]                                                                             | 0.75502727<br>4 |                  | 0.10853345<br>4  | 0.54908362<br>4  | 3 | -0.47088145  | 0.330265<br>423 | NM_013604 | 0.2657542<br>48 | 0.1782828<br>61 | 0.4280795<br>7  | 0.3181996<br>52 | 4 | 0.2975790<br>83   | 0.104403<br>055 |
| NP_038635.1 | myosin, heavy polypeptide 11, smooth muscle [Mus musculus]                                           | 0.63677706<br>4 | -2.46599758<br>- | 0.69226163<br>8  | 2.12818885<br>4  | 4 | -1.162417752 | 1.424802<br>086 | NM_013607 | 4.3849450<br>85 | 3.7805869<br>59 | 4.0030697<br>95 | 3.7801696<br>99 | 4 | 3.9871929<br>85   | 0.285192<br>039 |
| NP_038660.1 | purine-nucleoside phosphorylase [Mus musculus]                                                       | 0.16526253<br>9 | 2.74075273<br>5  | 0.27046195<br>5  | 1.39112739<br>2  | 4 | 1.006670178  | 1.353253<br>236 | NM_013632 | 0.0932354<br>49 | 0.1480994<br>32 | 0.4083973<br>14 | 0.4119236<br>17 | 4 | 0.2654139<br>53   | 0.168639<br>119 |
| NP_038675.1 | ribosomal protein S16 [Mus musculus]                                                                 |                 |                  | 0.06677091<br>4  | 0.57826684<br>5  | 2 | 0.322518879  | 0.361682<br>242 | NM_013647 | 0.3355147<br>38 | 0.3041861<br>82 | 0.1031104<br>66 | 0.2878858<br>86 | 4 | 0.0899169<br>49   | 0.297920<br>12  |
| NP_038700.1 | trans-acting transcription factor 1 [Mus musculus]                                                   | 0.35936204<br>7 |                  | 0.48419595<br>2  |                  | 2 | 0.062416952  | 0.596485<br>582 | NM_013672 | 0.0717536<br>47 | 0.0258233<br>34 | 0.3798356<br>8  | 0.1317528<br>07 | 4 | 0.1164145<br>43   | 0.194285<br>008 |
| NP_038704.1 | suppressor of Ty 5 homolog [Mus musculus]                                                            |                 |                  | 0.74263532<br>-  | 0.17751897<br>1  | 2 | 0.460077146  | 0.399597<br>604 | NM_013676 | 0.5879812<br>73 | 0.7379115<br>21 | 0.7745125<br>66 | 0.7027792<br>85 | 4 | 0.7007961<br>61   | 0.080710<br>987 |
| NP_038728.1 | ubiquitin specific protease 5 (isopeptidase T) [Mus musculus]                                        |                 | 0.05881187<br>2  | 0.29516121<br>3  |                  | 2 | -0.11817467  | 0.250296<br>769 | NM_013700 | 0.0498289<br>21 | 1.3929101<br>88 | 0.9459476<br>3  | 1.0505407<br>42 | 4 | 0.8598068<br>71   | 0.572731<br>195 |
| NP_038744.1 | ras-GTPase-activating protein SH3-domain binding protein [Mus musculus]                              |                 |                  | 0.30665380<br>3  | 0.04776200<br>4  | 2 | 0.1294459    | 0.250609<br>821 | NM_013716 | 0.7507557<br>49 | 1.1256966<br>15 | 1.0833636<br>74 | 0.8245339<br>52 | 4 | 0.9460874<br>97   | 0.186220<br>246 |
| NP_038838.1 | drebrin-like [Mus musculus]                                                                          | 0.05071719<br>7 | 0.19197653<br>1  | 0.20412190<br>2  | 1.07928798<br>2  | 4 | 0.381525903  | 0.470357<br>121 | NM_013810 | 0.6245224<br>82 | 0.5950822<br>76 | 0.6150376<br>7  | 0.5532205<br>11 | 4 | 0.2847044<br>94   | 0.606698<br>42  |
| NP_038898.1 | smoothelin [Mus musculus]                                                                            | 0.47076373<br>9 | 0.78451533<br>9  | 1.38155835<br>8  | 0.68093731<br>5  | 4 | -0.253593163 | 0.992005<br>369 | NM_013870 | 0.6577417<br>63 | 0.1584281<br>12 | 0.2370059<br>93 | 0.3309665<br>06 | 4 | 0.3460355<br>94   | 0.219447<br>666 |
| NP_056577.2 | thioredoxin reductase 1 [Mus musculus]                                                               |                 | 0.02955960<br>4  | 0.13736210<br>6  | 0.42999516<br>7  | 3 | -0.198972292 | 0.207205<br>264 | NM_015762 | 1.3453808<br>78 | 0.8442665<br>9  | 1.1551943<br>36 | 0.8492129<br>61 | 4 | 1.0485136<br>91   | 0.245593<br>53  |
| NP_056599.1 | osteoblast specific factor 2 (fascin I-like) [Mus musculus]                                          | 0.11818164<br>6 | 0.15308411<br>6  | -0.62141287<br>3 | 0.39648786<br>3  | 4 | -0.322291624 | 0.234713<br>062 | NM_015784 | 3.4548052<br>19 | 0.9153569<br>44 | 2.6172398<br>14 | 0.4406425<br>14 | 4 | 1.8570111<br>23   | 1.417004<br>618 |
| NP_056601.1 | histone 1, H1c [Mus musculus]                                                                        |                 | 0.20106342<br>5  | 0.61257019<br>8  |                  | 2 | 0.406816811  | 0.290979<br>23  | NM_015786 | 1.9267182<br>95 | 1.7621234<br>58 | 3.2363027<br>47 | 3.2356220<br>74 | 4 | 2.5401916<br>44   | 0.806212<br>09  |
| NP_056602.1 | histone 1, H1e [Mus musculus]                                                                        | 0.84561496<br>1 |                  | 0.44989089<br>6  | 1.61747443<br>6  | 3 | -0.407250124 | 1.232098<br>219 | NM_015787 | 0.3268777<br>25 | 0.5244103<br>45 | 0.7010157<br>63 | 0.0691968<br>78 | 4 | 0.2419363<br>15   | 0.463297<br>544 |
| NP_056642.1 | coatamer protein complex, subunit beta 2 (beta prime) [Mus musculus]                                 | 0.15902754<br>8 | 0.21257081<br>1  | 0.35445475<br>5  | 0.03693787<br>9  | 4 | 0.065993404  | 0.244988<br>555 | NM_015827 | 0.2913330<br>94 | 0.3007062<br>83 | 0.4313859<br>98 | 0.4492542<br>47 | 4 | 0.2225033<br>47   | 0.348898<br>982 |
| NP_056643.2 | glucosamine [Mus musculus]                                                                           | 0.32014042<br>1 | 0.53805573<br>2  | 0.15786109<br>6  | 0.68784425<br>5  | 4 | 0.265905165  | 0.449896<br>831 | NM_015828 | 1.7539780<br>34 | 0.3700564<br>58 | 0.5861889<br>76 | 0.1655522<br>3  | 4 | 0.7189439<br>25   | 0.711075<br>316 |
| NP_057885.1 | RAB10, member RAS oncogene family [Mus musculus]                                                     |                 | 0.11123832<br>3  | 0.19136554<br>9  | 0.07487907<br>1  | 4 | -0.126441621 | 0.283531<br>466 | NM_016676 | 0.1158245<br>6  | 0.3890032<br>29 | 0.2055740<br>64 | 0.0596290<br>48 | 4 | 0.1345954<br>45   | 0.214547<br>139 |
| NP_057925.1 | culin 3 [Mus musculus]                                                                               |                 |                  | 0.09725379<br>8  | 0.18195114<br>2  | 2 | 0.042348672  | 0.197427<br>707 | NM_016716 | 0.2929940<br>58 | 0.2655525<br>04 | 0.1481327<br>7  | 0.1211845<br>25 | 4 | 0.1463737<br>02   | 0.189113<br>383 |
| NP_057930.1 | IQ motif containing GTPase activating protein 1 [Mus musculus]                                       | 0.16388443<br>5 |                  | 0.09963387<br>-  | -0.52399803<br>- | 3 | -0.153249156 | 0.347061<br>263 | NM_016721 | 0.3996279<br>5  | 1.0424025<br>15 | 0.5532725<br>75 | 0.0693378<br>33 | 4 | 0.5161602<br>18   | 0.404779<br>074 |

|             |                                                                                                     |                  |                 |                  |                  |   |              |                 |           |                 |                 |                 |                 |   |                 |                 |
|-------------|-----------------------------------------------------------------------------------------------------|------------------|-----------------|------------------|------------------|---|--------------|-----------------|-----------|-----------------|-----------------|-----------------|-----------------|---|-----------------|-----------------|
| NP_058017.1 | stress-induced phosphoprotein 1 [Mus musculus]                                                      | 0.1483506<br>4   | 0.02760923<br>7 |                  |                  | 2 | -0.0879798   | 0.085376<br>87  | NM_016737 | 0.7009268<br>28 | 1.4343547<br>36 | 1.3278947<br>94 | 1.1159228<br>24 | 4 | 1.1447747<br>96 | 0.324151<br>678 |
| NP_058025.2 | ATPase, Ca++ transporting, ubiquitous [Mus musculus]                                                | 0.66291403<br>1  | 0.16062739<br>4 | 0.44910733<br>5  | 0.05468024<br>2  | 4 | 0.30449213   | 0.315743<br>394 | NM_016745 | 1.8569576<br>05 | 0.5745331<br>08 | 0.7167663<br>66 | 0.6818475<br>67 | 4 | 0.9575262<br>11 | 0.602667<br>661 |
| NP_058054.2 | ATP synthase, H+ transporting mitochondrial F1 complex, beta subunit [Mus musculus]                 | 0.13093244<br>1  | 0.18421262<br>2 | 0.10611134<br>9  | 0.18794789<br>5  | 4 | -0.152301077 | 0.040328<br>451 | NM_016774 | 0.3112535<br>89 | 0.2572273<br>75 | 0.2122577<br>96 | 0.1081732<br>62 | 4 | 0.0666012<br>11 | 0.259523<br>063 |
| NP_058072.2 | thioredoxin-like 1 [Mus musculus]                                                                   |                  | 0.38203881<br>9 |                  | 1.03895097<br>2  | 2 | 0.710494894  | 0.464507<br>036 | NM_016792 | 0.6627246<br>55 | 0.5503260<br>85 | 0.4916942<br>57 | 0.4273385<br>31 | 4 | 0.5330208<br>82 | 0.099998<br>647 |
| NP_058078.1 | PDZ and LIM domain 3 [Mus musculus]                                                                 | 0.33644256<br>4  | 2.42803940<br>6 | 0.45145120<br>2  | 0.08594074<br>7  | 4 | -0.657247197 | 1.223637<br>67  | NM_016798 | 4.1191908<br>38 | 3.7656195<br>56 | 4.3023712<br>38 | 3.5430175<br>16 | 4 | 3.9325497<br>87 | 0.342151<br>954 |
| NP_058085.1 | heterogenous nuclear ribonucleoprotein U [Mus musculus]                                             | 0.15870946<br>1  | 0.34432045<br>8 | 0.46034795<br>1  | 0.03564340<br>7  | 4 | 0.249755319  | 0.189230<br>971 | NM_016805 | 1.8137727<br>4  | 1.1383224<br>79 | 1.1765632<br>27 | 1.2841672<br>78 | 4 | 1.3532064<br>31 | 0.313190<br>924 |
| NP_058086.1 | heterogeneous nuclear ribonucleoprotein A2/B1 isoform 1 [Mus musculus]                              | 0.23405321<br>9  | 0.45931183<br>9 | -0.07615422<br>4 | 0.01927819<br>4  | 4 | 0.032456552  | 0.298722<br>657 | NM_182650 | 1.1992160<br>42 | 0.7694582<br>64 | 1.1867846<br>83 | 1.2589886<br>74 | 4 | 1.1036119<br>16 | 0.224987<br>746 |
| NP_058089.2 | RNA binding motif protein 3 [Mus musculus]                                                          | 1.67739556<br>9  |                 | 1.15644898<br>1  |                  | 2 | -1.416922275 | 0.368364<br>865 | NM_016809 | 0.5979470<br>57 | 0.5441467<br>54 | 1.0660448<br>35 | 0.7828595<br>82 | 4 | 0.4487761<br>28 | 0.729693<br>465 |
| NP_058556.1 | ARP1 actin-related protein 1 homolog A [Mus musculus]                                               |                  | 0.31577885<br>6 |                  | 0.79895051<br>9  | 2 | -0.557364688 | 0.341653<br>959 | NM_016860 | 0.3454805<br>22 | 0.5618033<br>43 | 0.3090943<br>07 | 0.2096354<br>28 | 4 | 0.3565034<br>22 | 0.148422<br>139 |
| NP_058557.1 | carboxyl terminal LIM domain protein 1 [Mus musculus]                                               | 0.37919305<br>2  | 0.13255357<br>5 | 0.27772528<br>1  | 0.01075871<br>2  | 4 | 0.055815658  | 0.274556<br>218 | NM_016861 | 0.0348802<br>45 | 0.1348262<br>19 | 0.4061812<br>87 | 0.5809597<br>43 | 4 | 0.2043586<br>42 | 0.343919<br>75  |
| NP_058574.2 | aspartyl aminopeptidase [Mus musculus]                                                              | 0.01814578<br>8  | 0.04569109<br>9 | 0.07034795<br>8  | 0.03840475<br>8  | 4 | 0.020301851  | 0.048962<br>728 | NM_016878 | 0.2652559<br>58 | 0.1299278<br>03 | 0.3237795<br>93 | 0.1352372<br>03 | 4 | 0.0809221<br>6  | 0.247770<br>525 |
| NP_058577.1 | phosphomannomutase 2 [Mus musculus]                                                                 | -0.14544037<br>- |                 | 0.18243545<br>6  | 0.24301080<br>2  | 3 | -0.068671905 | 0.222870<br>316 | NM_016881 | 1.2424011<br>07 | 0.4398711<br>39 | 0.8233314<br>27 | 0.5069424<br>03 | 4 | 0.1319359<br>66 | 0.931358<br>143 |
| NP_058578.2 | squamous cell carcinoma antigen recognized by T-cells 1 [Mus musculus]                              |                  | -               | 0.02155049<br>5  | 0.24929173<br>9  | 2 | 0.135421117  | 0.161037<br>379 | NM_016882 | 0.7092316<br>48 | 0.3074461<br>76 | 0.4319884<br>94 | 0.4396861<br>14 | 4 | 0.4720781<br>08 | 0.169317<br>053 |
| NP_058583.1 | claudin 7 [Mus musculus]                                                                            | 0.05470273<br>3  | 0.30722596<br>7 | 0.07149220<br>2  | 1.49973288<br>4  | 4 | 0.455937079  | 0.711846<br>32  | NM_016887 | 0.0415241<br>01 | 0.4866871<br>01 | 0.5194179<br>76 | 0.2474725<br>61 | 4 | 0.3237754<br>35 | 0.223833<br>39  |
| NP_058599.1 | esterase D/formylglutathione hydrolase [Mus musculus]                                               | 0.28250051<br>4  | 0.27374044<br>2 |                  |                  | 2 | 0.004380036  | 0.393321<br>752 | NM_016903 | 0.655271<br>44  | 0.1959692<br>84 | 0.4510399<br>14 | 0.3962541<br>17 | 4 | 0.4246976<br>15 | 0.188946<br>086 |
| NP_058602.1 | Sec61 alpha subunit homolog [Mus musculus]                                                          |                  | 0.38242560<br>2 |                  | 0.18264958<br>2  | 2 | 0.282537591  | 0.141262<br>98  | NM_016906 | 0.0279041<br>96 | 0.5706797<br>29 | 0.5211333<br>12 | 0.5639908<br>61 | 4 | 0.4209060<br>25 | 0.262917<br>825 |
| NP_058669.1 | ST6 (alpha-N-acetyl-neuraminyl-2,3-beta-galactosyl-1,3)-N-acetylgalactosaminide alpha-2,6-sialyltra | 0.39005993<br>7  | 0.36332462<br>8 | 0.10867840<br>9  | 1.68524162<br>9  | 4 | 0.441796182  | 0.886052<br>372 | NM_016973 | 2.6143574<br>11 | 0.3202578<br>44 | 0.5661858<br>67 | 0.0217104<br>66 | 4 | 0.8806277<br>97 | 1.177064<br>933 |
| NP_058674.1 | ornithine aminotransferase [Mus musculus]                                                           |                  |                 | 0.98891733<br>4  | 0.23229568<br>5  | 2 | -0.610606509 | 0.535012<br>298 | NM_016978 | 0.7939408<br>15 | 1.0849977<br>3  | 1.1322738<br>3  | 0.9845329<br>98 | 4 | 0.9989363<br>43 | 0.149906<br>716 |
| NP_059062.1 | acyl-Coenzyme A dehydrogenase, very long chain [Mus musculus]                                       |                  | 0.30900696<br>7 | 0.59022754<br>6  | 0.05464952<br>8  | 3 | -0.281528329 | 0.323315<br>507 | NM_017366 | 0.8072285<br>27 | 0.8697491<br>17 | 0.5769226<br>45 | 0.5085287<br>45 | 4 | 0.6906072<br>52 | 0.174899<br>122 |
| NP_059071.1 | SH3 domain protein 3 [Mus musculus]                                                                 |                  |                 | 0.33106701<br>1  | 1.91419927<br>7  | 2 | 0.791566133  | 1.587643<br>018 | NM_017375 | 1.3188054<br>54 | 0.3445775<br>06 | 0.4022294<br>58 | 0.1262118<br>15 | 4 | 0.5479560<br>58 | 0.527470<br>718 |
| NP_059502.1 | chloride channel calcium activated 3 [Mus musculus]                                                 | 2.40815411<br>8  | 0.29377124<br>3 | 2.30314984<br>2  | 2.15729714<br>8  | 4 | 0.711944514  | 2.146041<br>162 | NM_017474 | 4.9496728<br>61 | 2.9025380<br>05 | 5.5789934<br>27 | 5.9795624<br>02 | 4 | 4.8526916<br>74 | 1.367461<br>95  |
| NP_059505.1 | coatamer protein complex, subunit gamma [Mus musculus]                                              | 0.55795408<br>9  | 0.27868933<br>7 |                  |                  | 2 | -0.418321713 | 0.19747<br>98   | NM_201244 | 0.1156030<br>98 | 0.1063281<br>15 | 0.6807083<br>11 | 0.0209294<br>39 | 4 | 0.1094619<br>15 | 0.383207<br>493 |
| NP_059505.1 | coatamer protein complex, subunit gamma [Mus musculus]                                              | 0.55795408<br>9  | 0.27868933<br>7 |                  |                  | 2 | -0.418321713 | 0.19747<br>99   | NM_017477 | 0.2310400<br>99 | 0.2862510<br>65 | 0.3306064<br>18 | 0.2125253<br>73 | 4 | 0.1495856<br>89 | 0.258381<br>71  |
| NP_061223.2 | tyrosine 3-monooxygenase/tryptophan 5-monooxygenase activation protein, beta polypeptide [Mus muscu |                  |                 | 0.23556012<br>6  | -1.03999801<br>2 | 2 | -0.637799068 | 0.568823<br>483 | NM_018753 | 0.3101019<br>88 | 0.6891140<br>87 | 0.5098456<br>51 | 0.2768237<br>47 | 4 | 0.2914203<br>74 | 0.435090<br>835 |
| NP_061352.2 | Inositol (myo)-1(or 4)-monophosphatase 1 [Mus musculus]                                             |                  |                 | 0.12816844<br>5  | 0.00137258<br>6  | 2 | 0.063399729  | 0.091599<br>341 | NM_018864 | 0.2714015<br>25 | 0.0433338<br>54 | 0.2211479<br>44 | 0.2236866<br>14 | 4 | 0.0541917<br>22 | 0.232903<br>238 |
| NP_061356.1 | nucleolar protein 5 [Mus musculus]                                                                  |                  |                 | 0.38412770<br>1  | 0.83215289<br>1  | 2 | 0.224012595  | 0.860040<br>255 | NM_018868 | 1.1161678<br>4  | 0.6665467<br>39 | 0.9588484<br>28 | 1.0942873<br>82 | 4 | 0.9589625<br>97 | 0.206898<br>896 |
| NP_062512.1 | ras homolog gene family, member G [Mus musculus]                                                    |                  |                 | 0.17705397<br>8  | 0.32812074<br>4  | 2 | 0.075533383  | 0.357212<br>472 | NM_019566 | 0.2723981<br>04 | 0.2663686<br>55 | 0.1861549<br>04 | 0.0655320<br>01 | 4 | 0.1648474<br>15 | 0.158537<br>48  |
| NP_062616.2 | ribophorin II [Mus musculus]                                                                        | 0.12505358<br>9  | 0.31869270<br>2 | 0.32131103<br>3  | -0.01835055<br>4 | 4 | 0.027330342  | 0.269439<br>647 | NM_019642 | 0.1046407<br>35 | 0.9632814<br>89 | 0.9228751<br>37 | 1.0206030<br>28 | 4 | 0.7005297<br>3  | 0.538275<br>754 |
| NP_062616.2 | ribophorin II [Mus musculus]                                                                        | 0.12505358<br>9  | 0.31869270<br>2 | 0.32131103<br>3  | -0.01835055<br>4 | 4 | 0.027330342  | 0.269439<br>647 | NM_001039 | 0.2245623<br>39 | 0.4013671<br>59 | 0.4917255<br>11 | 0.2499164<br>11 | 4 | 0.3418928<br>52 | 0.126771<br>619 |
| NP_062650.1 | phospholipase C, delta 1 [Mus musculus]                                                             |                  |                 | -0.53399998<br>4 | 0.14102894<br>2  | 2 | -0.196485518 | 0.477317<br>53  | NM_019676 | 3.3152842<br>39 | 1.4183990<br>4  | 1.0745902<br>56 | 1.0962515<br>59 | 4 | 1.7261312<br>73 | 1.071036<br>947 |
| NP_062652.1 | Trk-fused gene [Mus musculus]                                                                       | 0.11261823<br>7  | 0.51279269<br>4 | 0.38737367<br>7  |                  | 3 | 0.262516045  | 0.330872<br>754 | NM_019678 | 0.6245224<br>82 | 0.6843496<br>1  | 0.6320695<br>7  | 0.5839010<br>65 | 4 | 0.6312106<br>82 | 0.041261<br>02  |
| NP_062667.1 | HLA-B-associated transcript 1A [Mus musculus]                                                       | 0.57481644<br>1  | 0.57228094<br>6 | 0.09886341<br>6  |                  | 3 | 0.349411324  | 0.388219<br>382 | NM_019693 | 0.8205162<br>39 | 1.3566422<br>23 | 1.1415171<br>39 | 1.0287833<br>12 | 4 | 1.0868647<br>28 | 0.223667<br>723 |
| NP_062677.1 | phosphofructokinase, platelet [Mus musculus]                                                        | 2.36036416<br>3  |                 | 1.85482227<br>3  | 0.26005068<br>3  | 3 | -1.318378586 | 1.390133<br>939 | NM_019703 | 0.8188552<br>75 | 0.6727839<br>27 | 0.2024036<br>44 | 0.7237404<br>17 | 4 | 0.6044458<br>16 | 0.274779<br>077 |
| NP_062722.1 | ubiquitin-like 1 (sentrin) activating enzyme subunit 1 [Mus musculus]                               | 0.81319393<br>8  |                 | 0.53920607<br>8  | 0.16274145<br>8  | 4 | 0.35828687   | 0.418059<br>517 | NM_019748 | 0.4650699<br>33 | 1.3423229<br>97 | 1.2918316<br>17 | 1.4029495<br>24 | 4 | 1.1255435<br>18 | 0.442652<br>807 |
| NP_062727.1 | cadherin 17 [Mus musculus]                                                                          | -0.45250139<br>1 |                 | 0.69214789<br>5  | 0.52294822<br>1  | 4 | 0.145234669  | 0.549523<br>289 | NM_019753 | 1.0763047<br>03 | 0.9924467<br>01 | 1.4143577<br>26 | 0.5786390<br>44 | 4 | 0.4772846<br>92 | 1.090475<br>504 |
| NP_062745.1 | destrin [Mus musculus]                                                                              | 0.44675480<br>6  |                 | 0.44301343<br>3  | 0.91706668<br>5  | 3 | -0.602278308 | 0.272621<br>149 | NM_019771 | 0.9533933<br>63 | 0.0719931<br>41 | 0.0348238<br>65 | 0.0917284<br>2  | 4 | 0.2879846<br>98 | 0.444232<br>664 |
| NP_062750.1 | staphylococcal nuclease domain containing 1 [Mus musculus]                                          | 0.24058863<br>6  |                 | 0.60570679<br>4  | 0.26184876<br>4  | 4 | 0.365271078  | 0.167534<br>347 | NM_019776 | 0.6212005<br>54 | 1.2199284<br>3  | 1.1793462<br>7  | 1.0684065<br>25 | 4 | 1.0684065<br>2  | 0.299661<br>008 |
| NP_062761.2 | SEC23B [Mus musculus]                                                                               |                  | 0.84425937<br>4 | 0.78649097<br>3  | 0.18072677<br>5  | 3 | -0.079498392 | 0.820074<br>425 | NM_019787 | 0.2308740<br>03 | 0.5197585<br>53 | 0.5984963<br>11 | 0.3403028<br>15 | 4 | 0.4223579<br>31 | 0.167243<br>084 |
| NP_062782.1 | PDZ and LIM domain 5 isoform ENH1 [Mus musculus]                                                    |                  | 0.23348862<br>2 | 0.05873043<br>8  | 0.34382818<br>5  | 3 | -0.017203042 | 0.296054<br>208 | NM_019809 | 0.1796055<br>79 | 0.6695779<br>75 | 0.9916996<br>88 | 0.3596034<br>21 | 4 | 0.4603188<br>76 | 0.498598<br>652 |



|             |                                                                                                      |             |             |            |   |              |          |           |            |           |           |           |           |          |
|-------------|------------------------------------------------------------------------------------------------------|-------------|-------------|------------|---|--------------|----------|-----------|------------|-----------|-----------|-----------|-----------|----------|
| NP_062782.1 | PDZ and LIM domain 5 isoform ENH1 [Mus musculus]                                                     | 0.23348862  | 0.05873043  | 0.34382818 | 3 | -0.017203042 | 0.296054 | NM_019808 | 0.10131807 | 0.8156151 | 0.8965286 | 0.3299280 | 0.5358476 | 0.382787 |
| NP_062801.1 | glycogen synthase kinase 3 beta [Mus musculus]                                                       | 1.09942081  | 0.83063165  | 0.83063165 | 2 | -0.134394579 | 1.364753 | NM_019827 | 0.23618900 | 1.1839964 | 0.8666445 | 0.7996071 | 0.7716903 | 0.394357 |
| NP_063921.1 | heterogeneous nuclear ribonucleoprotein H2 [Mus musculus]                                            | 0.27744501  | 0.09692245  | 0.09692245 | 2 | -0.187183735 | 0.127648 | NM_019868 | 1.1028801  | 0.6233624 | 0.6138714 | 0.8495637 | 0.7974194 | 0.230948 |
| NP_063922.1 | RNA binding motif protein 14 [Mus musculus]                                                          | 0.10662454  | 0.00582206  | 0.01445871 | 3 | -0.032662631 | 0.064850 | NM_019869 | 1.4305729  | 0.0857049 | 0.4374156 | 0.4472673 | 0.6013652 | 0.580689 |
| NP_063931.1 | dopa/tyrosine sulfotransferase [Mus musculus]                                                        | 0.22202748  | 0.37984596  | 0.37984596 | 2 | -0.300936725 | 0.111594 | NM_019878 | 4.8666246  | 2.3644370 | 2.2441720 | 1.9946054 | 2.8674598 | 1.341647 |
| NP_063932.1 | succinate-CoA ligase, GDP-forming, alpha subunit [Mus musculus]                                      | 0.13220463  | 0.09576960  | 0.09576960 | 2 | -0.018217511 | 0.161202 | NM_019879 | 0.9035644  | 0.5238074 | 0.5145289 | 0.2883314 | 0.5575580 | 0.255077 |
| NP_064337.1 | transmembrane protein 4 [Mus musculus]                                                               | 0.21171154  | 1.24155064  | 1.24155064 | 2 | 0.726631094  | 0.728206 | NM_019953 | 0.3003023  | 0.6020523 | 0.7942676 | 0.5262955 | 0.5557294 | 0.204251 |
| NP_064374.1 | START domain containing 10 [Mus musculus]                                                            | 0.14915868  | 0.80070431  | 0.01029835 | 4 | 0.102225089  | 0.474575 | NM_019990 | 1.5280869  | 0.0528367 | 0.5688064 | 0.3114874 | 0.6153044 | 0.643948 |
| NP_064418.1 | histone 1, H1b [Mus musculus]                                                                        | 0.81475495  | 0.16222432  | 0.11147044 | 3 | 0.362816571  | 0.392211 | NM_020034 | 1.8071288  | 1.9816344 | 1.8127900 | 2.1013854 | 1.9257347 | 0.142363 |
| NP_064433.2 | solute carrier family 6 (neurotransmitter transporter), member 14 [Mus musculus]                     | 0.17193073  | 1.04825174  | 0.862799   | 2 | 0.438160504  | 0.862799 | NM_020049 | 3.2422018  | 1.2789994 | 0.9262603 | 1.3283144 | 1.6939440 | 1.047585 |
| NP_065607.1 | ATP synthase, H+ transporting, mitochondrial F0 complex, subunit f, isoform 2 [Mus musculus]         | 0.20129915  | 0.33107840  | 0.00256862 | 4 | -0.26623136  | 0.221737 | NM_020582 | 0.4584260  | 1.0886487 | 1.0731520 | 0.6645677 | 0.8211986 | 0.311527 |
| NP_065631.3 | parvin, alpha [Mus musculus]                                                                         | 0.05443668  | 1.09350447  | 0.18701853 | 3 | -0.408695444 | 0.605225 | NM_020606 | 0.4115888  | 0.5512030 | 0.1655966 | 0.0361680 | 0.0853452 | 0.396998 |
| NP_067248.1 | creatine kinase, brain [Mus musculus]                                                                | 0.40921813  | 2.44557693  | 0.57778379 | 4 | -1.07501783  | 1.251910 | NM_021273 | 0.3918214  | 1.5950927 | 1.0453749 | 0.8286385 | 0.7693122 | 0.838624 |
| NP_067370.2 | hypoxia up-regulated 1 [Mus musculus]                                                                | 0.37006667  | 0.21791104  | 0.36238082 | 4 | 0.145168003  | 0.280379 | NM_021395 | 0.8570574  | 0.0372320 | 0.4981501 | 0.5541318 | 0.4866428 | 0.338557 |
| NP_067389.3 | hypothetical protein LOC74340 [Mus musculus]                                                         | 0.56860020  | 0.22480986  | 0.243096   | 2 | -0.396705034 | 0.243096 | NM_021414 | 2.3043107  | 1.8717221 | 1.7263365 | 1.8430676 | 1.9363592 | 0.253231 |
| NP_067448.1 | aldo-keto reductase family 1, member A4 (aldehyde reductase) [Mus musculus]                          | 0.04787767  | 0.15219838  | 0.141475   | 2 | -0.052160356 | 0.141475 | NM_021473 | 0.3587682  | 1.3072991 | 1.1618215 | 0.7997161 | 0.9069012 | 0.423178 |
| NP_067482.3 | sulfide quinone reductase-like [Mus musculus]                                                        | -0.29627352 | 0.05410539  | 0.03497020 | 4 | 0.010297848  | 0.225980 | NM_021507 | 1.2490449  | 0.0771852 | 0.3820900 | 0.0877323 | 0.1755093 | 0.729508 |
| NP_067485.1 | heterogeneous nuclear ribonucleoprotein H1 [Mus musculus]                                            | 0.55970560  | 0.04796228  | 0.342765   | 2 | -0.317333945 | 0.342765 | NM_021510 | 1.837043   | 0.6977542 | 0.8463009 | 0.6625591 | 1.0100796 | 0.554826 |
| NP_067493.1 | RAB2, member RAS oncogene family [Mus musculus]                                                      | 0.02139244  | 0.43945882  | 0.325871   | 2 | 0.209033191  | 0.325871 | NM_021518 | 0.4536092  | 0.0785187 | 0.1518920 | 0.1514445 | 0.2088661 | 0.166766 |
| NP_067513.1 | epsilon subunit of coatomer protein complex [Mus musculus]                                           | 0.75428682  | 3.99690014  | 3.359596   | 2 | 1.62130666   | 3.359596 | NM_021538 | 0.5746935  | 0.3100789 | 0.2196387 | 0.1726988 | 0.0319307 | 0.408415 |
| NP_068695.1 | actinin alpha 4 [Mus musculus]                                                                       | 0.23005714  | 0.13230879  | 0.07846271 | 4 | -0.001583789 | 0.191399 | NM_021895 | 0.1415141  | 0.6259052 | 0.1951004 | 0.4972616 | 0.3649453 | 0.234077 |
| NP_071705.2 | heat shock 70kD protein 5 (glucose-regulated protein) [Mus musculus]                                 | 0.36902008  | 0.26430360  | 0.10919977 | 4 | 0.173025993  | 0.330084 | NM_022310 | 0.4152410  | 0.8769156 | 0.9159917 | 0.7579387 | 0.7415217 | 0.227669 |
| NP_071719.1 | stromal cell-derived factor 2-like 1 [Mus musculus]                                                  | 0.69564123  | 0.28686062  | 0.694733   | 2 | 0.204390306  | 0.694733 | NM_022324 | 0.6145566  | 0.4346779 | 0.3650269 | 0.6883072 | 0.2183638 | 0.572394 |
| NP_071720.1 | cathepsin Z preproprotein [Mus musculus]                                                             | 1.4763726   | 0.268482    | 0.854107   | 2 | 0.8724273    | 0.854107 | NM_022325 | 0.1559645  | 0.4116743 | 0.3717155 | 0.2052461 | 0.2861501 | 0.124594 |
| NP_071855.1 | myosin, heavy polypeptide 9, non-muscle [Mus musculus]                                               | 0.02012393  | 0.72076670  | 0.07176063 | 4 | 0.285498246  | 0.334474 | NM_022410 | 1.6410324  | 0.5957768 | 0.2546152 | 0.0228366 | 0.6285653 | 0.714821 |
| NP_075368.1 | ADP-ribosylation factor-like 6 interacting protein 5 [Mus musculus]                                  | 0.14753014  | 0.36969093  | 0.365730   | 2 | -0.111080392 | 0.365730 | NM_022992 | 1.5745939  | 0.7074917 | 0.0537583 | 0.1300447 | 0.5514498 | 0.770996 |
| NP_075373.1 | vacuolar protein sorting 35 [Mus musculus]                                                           | 0.07850254  | 0.29648369  | 0.154135   | 2 | 0.18749312   | 0.154135 | NM_022997 | 0.1869138  | 0.6460198 | 0.5566227 | 0.1342592 | 0.2874970 | 0.387089 |
| NP_075550.1 | epithelial protein lost in neoplasm [Mus musculus]                                                   | 0.74640912  | 1.48384303  | 1.577028   | 2 | 0.368716956  | 1.577028 | NM_023063 | 0.1825233  | 0.2328002 | 0.1063403 | 0.4831937 | 0.1348143 | 0.294163 |
| NP_075615.2 | cell line NK14 derived transforming oncogene [Mus musculus]                                          | 0.29733051  | 0.66261022  | 0.258291   | 2 | 0.479970368  | 0.258291 | NM_023126 | 0.9600372  | 0.0615316 | 0.0620315 | 0.0972351 | 0.1848097 | 0.517088 |
| NP_075631.1 | actin related protein 2/3 complex, subunit 1B [Mus musculus]                                         | 0.26779748  | 0.39017348  | 0.451053   | 3 | 0.586994038  | 0.451053 | NM_023142 | 0.1607813  | 0.3986007 | 0.4742827 | 0.5270103 | 0.3097781 | 0.318102 |
| NP_075638.2 | CNDP dipeptidase 2 (metallopeptidase M20 family) [Mus musculus]                                      | 1.53493835  | -0.40190261 | 1.48052708 | 3 | 0.871187608  | 1.102864 | NM_023149 | 0.6079128  | 0.2295826 | 0.2123841 | 0.5549759 | 0.4012139 | 0.209349 |
| NP_075643.1 | ETHE1 protein [Mus musculus]                                                                         | 0.60623300  | 0.14099848  | 0.748037   | 3 | 0.141535485  | 0.748037 | NM_023154 | 3.0644786  | 0.9478145 | 0.4502874 | 0.4815110 | 1.2360229 | 1.240024 |
| NP_075745.1 | keratin 20 [Mus musculus]                                                                            | 0.74492927  | 0.85224257  | 0.04034540 | 4 | 0.19312809   | 0.515945 | NM_023256 | 1.9798691  | 0.6262229 | 0.3701783 | 0.1446670 | 0.5228116 | 1.060922 |
| NP_075747.2 | PYD and CARD domain containing [Mus musculus]                                                        | 0.56758804  | 0.11734440  | 0.493796   | 3 | -0.36109729  | 0.493796 | NM_023258 | 2.6691692  | 1.1143228 | 0.2412500 | 0.3097556 | 0.9287466 | 1.300006 |
| NP_075770.1 | succinate dehydrogenase Fp subunit [Mus musculus]                                                    | 0.09782361  | 0.31550777  | 0.24510668 | 4 | -0.45739379  | 0.305806 | NM_023281 | 0.9882736  | 0.0241889 | 0.0394900 | 0.2634021 | 0.3288386 | 0.453015 |
| NP_075863.2 | succinate dehydrogenase Ip subunit [Mus musculus]                                                    | 0.41241837  | 0.12298829  | 0.33889850 | 3 | -0.291438391 | 0.150433 | NM_023374 | 1.1095239  | 1.3160920 | 1.1915486 | 0.8541778 | 1.1178356 | 0.195212 |
| NP_076092.1 | splicing factor proline/glutamine rich (polypyrimidine tract binding protein associated) [Mus muscu] | 0.50224683  | 0.00181719  | 0.252088   | 3 | 0.253297984  | 0.252088 | NM_023603 | 1.7205787  | 1.1648180 | 1.0200726 | 1.0200726 | 1.2495326 | 0.319660 |
| NP_076224.1 | ARF3 actin-related protein 3 homolog [Mus musculus]                                                  | 0.25117558  | 0.63608945  | 0.272175   | 2 | 0.443632519  | 0.272175 | NM_023735 | 0.2305418  | 0.0155635 | 0.1134803 | 0.0405684 | 0.0719725 | 0.125426 |
| NP_077150.1 | 3-oxoacid CoA transferase 1 [Mus musculus]                                                           | 0.64809216  | 0.45997917  | 0.06060027 | 4 | -0.31585054  | 0.850661 | NM_024188 | 1.5092626  | 0.6554358 | 1.5405186 | 1.5759979 | 1.3203037 | 0.444082 |

|             |                                                                                                   |             |             |   |             |             |  |   |              |          |           |           |           |           |           |           |          |
|-------------|---------------------------------------------------------------------------------------------------|-------------|-------------|---|-------------|-------------|--|---|--------------|----------|-----------|-----------|-----------|-----------|-----------|-----------|----------|
|             |                                                                                                   |             |             | 7 | 4           | 8           |  |   |              | 64       | 18        | 95        | 25        |           | 76        |           |          |
| NP_077168.2 | SEC13 related gene [Mus musculus]                                                                 | 0.03718610  |             | 5 |             | 0.27523032  |  | 2 | -0.156208215 | 0.168322 | NM_024206 | 0.6594027 | 0.1194006 | 0.0941449 | 0.3044279 | 0.0950576 | 0.414111 |
|             |                                                                                                   |             | 0.64695466  | 1 | 0.17367069  | 0.54907692  |  | 4 | 0.103574844  | 0.523409 | NM_024212 | 0.0677673 | 1.4053527 | 1.5524829 | 1.4367287 | 1.0816992 | 0.768918 |
| NP_077174.1 | ribosomal protein L4 [Mus musculus]                                                               | 0.33850641  |             | 1 |             |             |  | 4 |              |          |           |           |           |           |           |           |          |
| NP_077183.1 | pyruvate dehydrogenase (lipoamide) beta [Mus musculus]                                            | 0.22012611  | 0.19665675  | 1 | 0.24062894  | 2.12895959  |  | 4 | 0.598264473  | 1.040163 | NM_024221 | 0.1094907 | 0.2201099 | 0.0592226 | 0.1104124 | 0.0148573 | 0.158379 |
|             |                                                                                                   |             |             | 4 |             |             |  | 4 |              | 303      |           | 51        | 36        | 08        | 99        | 24        | 171      |
| NP_077187.1 | sorting nexin 5 [Mus musculus]                                                                    |             | 0.18597269  |   | 0.54060585  |             |  | 2 | 0.363289277  | 0.250763 | NM_024225 | 0.1772248 | 0.0142937 |           | 0.3797951 | 0.2127544 | 0.156027 |
|             |                                                                                                   |             |             | 4 |             |             |  | 2 |              | 516      |           | 64        | 33        | 04        | 5         | 87        | 639      |
| NP_077776.1 | RAB5C, member RAS oncogene family [Mus musculus]                                                  | 0.63661043  | 0.21731434  | 2 | 0.06976348  |             |  | 3 | 0.163019857  | 0.434533 | NM_024456 | 0.7673653 | 0.2565676 | 0.1748711 | 0.3545404 | 0.3883361 | 0.263144 |
|             |                                                                                                   |             |             | 4 |             |             |  | 3 |              | 594      |           | 9         | 32        | 98        | 63        | 71        | 79       |
| NP_079555.1 | heterogeneous nuclear ribonucleoprotein K [Mus musculus]                                          | 0.19940098  | 0.28964589  | 2 | 0.07116012  | 0.17786260  |  | 4 | 0.084816909  | 0.209426 | NM_025279 | 0.2886755 | 0.6803879 | 0.6046107 | 0.7451251 | 0.5796998 | 0.202335 |
|             |                                                                                                   |             |             | 2 |             |             |  | 4 |              | 783      |           | 51        | 63        | 85        | 79        | 7         | 804      |
| NP_079589.1 | ATP synthase, H+ transporting, mitochondrial F1 complex, delta subunit precursor [Mus musculus]   |             | -0.27821586 |   |             | 0.71995543  |  | 2 | -0.499086648 | 0.312357 | NM_025313 | 0.3056173 | 0.3883189 | 0.0804053 | 0.0658566 | 0.0243125 | 0.290190 |
|             |                                                                                                   |             |             |   |             |             |  | 2 |              | 049      |           | 85        | 47        | 83        | 2         | 81        | 342      |
| NP_079634.1 | NADH dehydrogenase (ubiquinone) 1 alpha subcomplex, 9 [Mus musculus]                              |             | 0.35336706  | 5 | 0.06119631  | 0.21905355  |  | 3 | 0.024372398  | 0.295648 | NM_025358 | 0.3258811 | 0.6928831 | 0.3990461 | 0.2682206 | 0.4215077 | 0.188671 |
|             |                                                                                                   |             |             | 5 |             |             |  | 3 |              | 178      |           | 46        | 35        | 81        | 8         | 85        | 226      |
| NP_079683.2 | ubiquinol-cytochrome c reductase core protein 1 [Mus musculus]                                    | 0.12293076  | 0.18785505  | 3 | 0.02625521  | 0.00312458  |  | 4 | -0.083479111 | 0.087987 | NM_025407 | 0.2343620 | 0.3400913 | 0.1815454 | 0.3048816 | 0.2652201 | 0.071022 |
|             |                                                                                                   |             |             | 3 |             |             |  | 4 |              | 774      |           | 27        | 43        | 15        | 97        | 21        | 107      |
| NP_079705.1 | serine (or cysteine) proteinase inhibitor, clade B, member 1a [Mus musculus]                      | 0.19549888  | 0.31951696  | 9 | 0.15850923  | 0.17787255  |  | 4 | 0.115099967  | 0.219151 | NM_025429 | 0.7042487 | 0.3896405 | 0.1315309 | 0.0737732 | 0.2221462 | 0.397128 |
|             |                                                                                                   |             |             | 9 |             |             |  | 4 |              | 943      |           | 56        | 3         | 69        | 66        | 63        | 483      |
| NP_079754.2 | isochorismatase domain containing 1 [Mus musculus]                                                |             |             |   | -1.50175949 | 1.54789956  |  | 2 | 0.023070038  | 2.156434 | NM_025478 | 0.2845231 | 0.0545693 | 0.5213590 | 0.4766798 | 0.1920213 | 0.380999 |
|             |                                                                                                   |             |             |   |             |             |  | 2 |              | 599      |           | 41        | 94        | 91        | 56        | 4         | 346      |
| NP_079843.1 | cytochrome c-1 [Mus musculus]                                                                     | 0.10960842  | 0.46492583  | 3 | 0.20851638  | 0.13971207  |  | 4 | -0.23069068  | 0.161550 | NM_025567 | 0.3421585 | 0.0950056 | 0.4775908 | 0.3004683 | 0.1327265 | 0.353085 |
|             |                                                                                                   |             |             | 3 |             |             |  | 4 |              | 639      |           | 94        | 49        | 78        | 13        | 62        | 198      |
| NP_079845.1 | microsomal glutathione S-transferase 3 [Mus musculus]                                             |             | 0.24899939  | 4 |             | 0.06566180  |  | 2 | -0.091668795 | 0.222499 | NM_025569 | 2.0595954 | 0.8725229 | 1.1989341 | 0.7299542 | 1.2152516 | 0.596142 |
|             |                                                                                                   |             |             | 4 |             |             |  | 2 |              | 066      |           | 19        | 27        | 87        | 24        | 4         | 944      |
| NP_079892.1 | translocase of inner mitochondrial membrane 50 homolog [Mus musculus]                             |             |             |   | 0.36041173  | 0.28215417  |  | 2 | 0.039128782  | 0.454362 | NM_025616 | 0.2890077 | 0.9284017 | 1.0440697 | 0.8605657 | 0.7805112 | 0.336312 |
|             |                                                                                                   |             |             |   |             |             |  | 2 |              | 708      |           | 44        | 18        | 32        | 53        | 4         | 892      |
| NP_079894.1 | scorcin [Mus musculus]                                                                            |             | 0.15205286  | 2 |             | -0.55025545 |  | 2 | -0.199101294 | 0.496606 | NM_025618 | 0.6212005 | 0.0747849 | 0.0344963 | 0.0766362 | 0.1088207 | 0.342139 |
|             |                                                                                                   |             |             | 2 |             |             |  | 2 |              | 97       |           | 54        | 83        | 2         | 83        | 4         | 456      |
| NP_079923.2 | UMP-CMP kinase [Mus musculus]                                                                     | 0.21692291  | 0.09143166  | 3 | 0.14425405  | 0.26580185  |  | 4 | 0.071141164  | 0.205451 | NM_025647 | 2.2987742 | 0.2330101 | 0.0415347 | 0.3265054 | 0.5409360 | 1.193948 |
|             |                                                                                                   |             |             | 3 |             |             |  | 4 |              | 451      |           | 42        | 72        | 35        | 13        | 66        | 681      |
| NP_079976.1 | phosphoglucosyltransferase 1 [Mus musculus]                                                       | 0.49464207  | 0.33501283  | 5 | 1.75426755  | 1.03525730  |  | 4 | -0.219659872 | 1.199043 | NM_025700 | 0.3587682 | 0.3547739 | 0.4295493 | 0.1403901 | 0.0712912 | 0.382305 |
|             |                                                                                                   |             |             | 5 |             |             |  | 4 |              | 351      |           | 34        | 48        | 47        | 36        | 31        | 058      |
| NP_079986.1 | ubiquinol-cytochrome c reductase, Rieske iron-sulfur polypeptide 1 [Mus musculus]                 | 0.26984924  | 0.35085596  | 9 | 0.18974185  | 0.10470539  |  | 4 | -0.176435419 | 0.198633 | NM_025710 | 0.5049330 | 1.5952618 | 1.3367519 | 0.8521240 | 1.0722677 | 0.487786 |
|             |                                                                                                   |             |             | 9 |             |             |  | 4 |              | 575      |           | 7         | 97        | 68        | 13        | 4         | 389      |
| NP_079987.2 | asporin [Mus musculus]                                                                            | 0.26150037  | 1.38916281  | 7 |             | -1.37185824 |  | 3 | -0.833173559 | 0.948054 | NM_025711 | 5.4147427 | 3.0777068 | 3.5252779 | 2.7003554 | 3.6795207 | 1.204952 |
|             |                                                                                                   |             |             | 7 |             |             |  | 3 |              | 921      |           | 95        | 11        | 7         | 32        | 4         | 436      |
| NP_080090.1 | PAI-1 mRNA-binding protein [Mus musculus]                                                         |             | 0.14637989  | 5 |             | 0.17308507  |  | 2 | 0.159732487  | 0.018883 | NM_025814 | 0.7906188 | 0.8185278 | 0.8521089 | 0.8939251 | 0.8387952 | 0.044528 |
|             |                                                                                                   |             |             | 5 |             |             |  | 2 |              | 416      |           | 87        | 99        | 5         | 48        | 4         | 222      |
| NP_080111.1 | propionyl Coenzyme A carboxylase, beta polypeptide [Mus musculus]                                 | 2.85979E-05 | 0.09124534  | 2 | 0.70037936  |             |  | 3 | -0.203035141 | 0.433120 | NM_025835 | 2.3286715 | 0.8059634 |           | 0.9621492 | 1.2856246 | 0.702427 |
|             |                                                                                                   |             |             | 2 |             |             |  | 3 |              | 745      |           | 95        | 67        |           | 48        | 4         | 965      |
| NP_080135.1 | ADP-ribosylation factor-like 1 [Mus musculus]                                                     |             | 0.09843196  | 8 | 0.67322852  |             |  | 2 | 0.385830246  | 0.406442 | NM_025859 | 1.5280869 | 0.2001060 | 0.1258729 | 0.2360758 | 0.3415610 | 0.812406 |
|             |                                                                                                   |             |             | 8 |             |             |  | 2 |              | 542      |           | 24        | 02        | 76        | 4         | 27        | 328      |
| NP_080163.1 | RAB5A, member RAS oncogene family [Mus musculus]                                                  | 0.54394582  | 0.51157547  | 7 |             |             |  | 2 | 0.016185174  | 0.746366 | NM_025887 | 0.3504634 | 0.0366523 | 0.2405307 | 0.3550623 | 0.2456772 | 0.149607 |
|             |                                                                                                   |             |             | 7 |             |             |  | 2 |              | 273      |           | 14        | 67        | 23        | 33        | 4         | 239      |
| NP_080175.1 | ubiquinol cytochrome c reductase core protein 2 [Mus musculus]                                    | 0.13691885  | 0.34270089  | 9 | 0.11496581  | 0.12469246  |  | 4 | -0.059990371 | 0.224024 | NM_025899 | 0.3215626 | 0.2800424 | 0.0170493 | 0.0737131 | 0.1277106 | 0.201916 |
|             |                                                                                                   |             |             | 9 |             |             |  | 4 |              | 292      |           | 4         | 55        | 31        | 19        | 61        | 286      |
| NP_080218.1 | GTP-binding protein PTD004 [Mus musculus]                                                         |             | 0.68337918  | 9 | 0.18667211  |             |  | 2 | 0.435025654  | 0.351224 | NM_025942 | 0.6145566 | 0.2766906 | 0.3102297 | 0.5609204 | 0.4405993 | 0.171853 |
|             |                                                                                                   |             |             | 9 |             |             |  | 2 |              | 938      |           | 98        | 76        | 92        | 94        | 224       | 224      |
| NP_080239.1 | ribosomal protein S10 [Mus musculus]                                                              |             | 0.47244206  | 3 | 0.15688303  |             |  | 2 | 0.314662548  | 0.223133 | NM_025963 | 0.3753778 | 0.2529427 | 0.1873590 | 0.4902945 | 0.3264935 | 0.134149 |
|             |                                                                                                   |             |             | 3 |             |             |  | 2 |              | 931      |           | 75        | 7         | 57        | 19        | 4         | 865      |
| NP_080250.1 | ribosomal protein L14 [Mus musculus]                                                              | 0.11817467  | 0.41288667  | 8 | 0.21272304  | 0.51095006  |  | 4 | 0.313683616  | 0.179974 | NM_025974 | 0.4384945 | 0.2998955 | 0.4684088 | 0.8643399 | 0.5177847 | 0.242419 |
|             |                                                                                                   |             |             | 8 |             |             |  | 4 |              | 146      |           | 09        | 83        | 46        | 55        | 4         | 142      |
| NP_080278.3 | LYRIC [Mus musculus]                                                                              | 0.45208728  | 0.30044814  | 2 | 1.02509027  |             |  | 3 | 0.090851618  | 0.812619 | NM_026002 | 0.4851675 | 1.3244855 | 1.4288026 | 1.2297623 | 1.1170545 | 0.429029 |
|             |                                                                                                   |             |             | 2 |             |             |  | 3 |              | 228      |           | 98        | 95        | 08        | 27        | 4         | 39       |
| NP_080306.1 | eukaryotic translation initiation factor 2, subunit 2 (beta) [Mus musculus]                       | 0.15114672  | 0.53324205  | 5 | 0.18599588  | 0.11490805  |  | 4 | 0.170749819  | 0.281879 | NM_026030 | 0.5032721 | 0.6490814 | 0.4437783 | 0.3896575 | 0.4964473 | 0.111835 |
|             |                                                                                                   |             |             | 5 |             |             |  | 4 |              | 853      |           | 06        | 96        | 09        | 56        | 67        | 963      |
| NP_080371.1 | small nuclear ribonucleoprotein D3 [Mus musculus]                                                 | 0.13504278  | 0.67451502  | 9 | 0.30353553  | 0.35021820  |  | 4 | 0.298306493  | 0.332689 | NM_026095 | 0.1782214 | 0.9322729 | 1.1747599 | 1.5828137 | 0.9670169 | 0.590414 |
|             |                                                                                                   |             |             | 9 |             |             |  | 4 |              | 359      |           | 42        | 41        | 72        | 62        | 4         | 626      |
| NP_080431.1 | signal sequence receptor, gamma [Mus musculus]                                                    | 0.23265262  | 0.58834288  | 1 | 0.60579351  | 0.16216053  |  | 4 | 0.316157119  | 0.362277 | NM_026155 | 0.0286793 | 0.8460714 | 0.8769562 | 0.9583419 | 0.6775122 | 0.435139 |
|             |                                                                                                   |             |             | 1 |             |             |  | 4 |              | 57       |           | 13        | 52        | 51        | 54        | 4         | 678      |
| NP_080448.1 | 2,4-dienyl CoA reductase 1, mitochondrial [Mus musculus]                                          | 0.63586321  | 0.59314806  | 1 | 0.42282589  | 0.18960728  |  | 4 | -0.068983438 | 0.563277 | NM_026172 | 2.1625751 | 1.3390214 | 0.9938096 | 1.1916634 | 1.4217674 | 0.513724 |
|             |                                                                                                   |             |             | 1 |             |             |  | 4 |              | 449      |           | 9         | 92        | 16        | 63        | 4         | 554      |
| NP_080451.3 | splicing factor 3a, subunit 1 [Mus musculus]                                                      |             | 0.65457793  | 4 | 0.27889066  | 0.51676010  |  | 4 | 0.369910286  | 0.274969 | NM_026175 | 1.0131880 | 1.0146512 | 1.0226491 | 0.8265973 | 0.9692714 | 0.095206 |
|             |                                                                                                   |             |             | 4 |             |             |  | 4 |              | 025      |           | 69        | 25        | 16        | 81        | 4         | 895      |
| NP_080471.1 | 5-aminoimidazole-4-carboxamide ribonucleotide formyltransferase/IMP cyclohydrolase [Mus musculus] | 0.31233019  | 0.26381088  | 9 | 0.37567965  |             |  |   |              |          |           |           |           |           |           |           |          |





|             |                                                                                                       |             |             |             |              |   |   |              |          |           |           |           |           |
|-------------|-------------------------------------------------------------------------------------------------------|-------------|-------------|-------------|--------------|---|---|--------------|----------|-----------|-----------|-----------|-----------|
| NP_598569.1 | high density lipoprotein binding protein [Mus musculus]                                               | 0.60766167  | 0.59922886  | 0.26500512  | 0.21751840   | 2 | 4 | 0.723602879  | 1.413507 | 0.0856393 | 0.3860740 | 0.3316729 | 0.256616  |
| NP_598576.1 | lamin B receptor [Mus musculus]                                                                       | 0.08765870  | 0.04629067  | 0.178391019 | 0.178391019  | 8 | 3 | 0.608426073  | 1.020199 | 1.0314586 | 1.4833412 | 1.5569411 | 1.3899263 |
| NP_598677.1 | eukaryotic translation initiation factor 3, subunit 9 [Mus musculus]                                  | 0.16350372  | 0.27500322  | 0.54698159  | 0.05860802   | 6 | 4 | 0.123522531  | 0.338601 | 0.0714214 | 0.4593618 | 0.9340681 | 0.8715670 |
| NP_598694.2 | ribophorin I [Mus musculus]                                                                           | 0.31576647  | 0.14281548  | 0.32950993  | 0.32950993   | 8 | 3 | -0.043024008 | 0.334012 | 2.26      | 1.0002491 | 0.7183273 | 0.7456457 |
| NP_598714.1 | splicing factor 3b, subunit 3 [Mus musculus]                                                          | 0.28833264  | 0.42999401  | 0.100169    | 0.100169     | 7 | 2 | -0.359163333 | 0.100169 | 1.1460651 | 1.1159006 | 0.9535974 | 0.5596540 |
| NP_598738.1 | transferrin [Mus musculus]                                                                            | 0.29566304  | 1.19226878  | 0.38904758  | -0.5922891   | 2 | 4 | -0.021182736 | 0.818390 | 0.8138723 | 0.1519849 | 0.3359311 | 0.4480524 |
| NP_598798.1 | ATP citrate lyase [Mus musculus]                                                                      | 0.22640381  | 0.30837508  | 0.13169958  | 0.37002649   | 7 | 4 | 0.193276452  | 0.224495 | 1.0098661 | 0.3360112 | 1.0146211 | 0.5383146 |
| NP_598811.2 | RAB15, member RAS oncogene family [Mus musculus]                                                      | 0.27417068  | 0.01246150  | 0.77152013  | 0.77152013   | 3 | 3 | 0.344409771  | 0.396682 | 0.5946251 | 1.1856938 | 1.3273455 | 1.0186713 |
| NP_598862.1 | proteasome 26S non-ATPase subunit 2 [Mus musculus]                                                    | 0.52104955  | 0.76218142  | 0.55951781  | 0.55951781   | 8 | 3 | -0.26688323  | 0.689852 | 0.5755794 | 0.8926546 | 0.9024509 | 0.9520539 |
| NP_619592.1 | phosphatidate cytidyltransferase 2 [Mus musculus]                                                     | 1.41279640  | 2.28663246  | 1.45156350  | 1.45156350   | 3 | 3 | -1.716997458 | 0.493699 | 3.9863137 | 2.4560635 | 3.8096153 | 4.9226401 |
| NP_619593.1 | ATPase, H+/K+ transporting, nongastric, alpha polypeptide [Mus musculus]                              | 0.17286414  | 0.21505040  | 0.274297    | 0.274297     | 1 | 2 | -0.021093129 | 0.003    | 1.2224695 | 0.2928926 | 0.1479087 | 0.1049603 |
| NP_619621.1 | LUC7-like 2 [Mus musculus]                                                                            | 0.03892625  | 1.01740604  | 0.28349158  | 0.67366391   | 6 | 4 | -0.005331074 | 0.723580 | 1.0148490 | 0.3447980 | 0.3891476 | 0.3637952 |
| NP_647456.1 | UDP-glucose pyrophosphorylase 2 [Mus musculus]                                                        | 0.27880472  | 0.87828056  | 1.79429661  | 1.79429661   | 9 | 4 | -1.274201679 | 1.275492 | 1.275492  | 1.4930425 | 1.6517524 | 1.9898229 |
| NP_647461.2 | myosin, light polypeptide kinase telokin isoform [Mus musculus]                                       | 0.08728020  | 0.12750753  | 0.29319532  | 0.29319532   | 9 | 4 | -0.047131816 | 0.187177 | 1.2490449 | 1.3722727 | 0.9492551 | 0.6582464 |
| NP_659033.1 | acetyl-Coenzyme A acetyltransferase 1 precursor [Mus musculus]                                        | 0.15063551  | -1.15723189 | -0.50329819 | -0.50329819  | 2 | 2 | -0.50329819  | 0.924801 | 1.3752782 | 1.1615839 | 1.2190779 | 1.1074059 |
| NP_659093.1 | propionyl-Coenzyme A carboxylase, alpha polypeptide [Mus musculus]                                    | 0.59946227  | 0.10086515  | 0.73014538  | 0.73014538   | 8 | 4 | -0.06274553  | 0.558511 | 0.5913032 | 1.4914891 | 1.5214415 | 1.9085202 |
| NP_659097.2 | epiplakin 1 [Mus musculus]                                                                            | -0.22116416 | 0.15493751  | 1.04702391  | 1.04702391   | 7 | 2 | 0.446043201  | 0.849915 | 0.5697106 | 0.6480161 | 0.8866327 | 0.7199927 |
| NP_659115.2 | eukaryotic translation termination factor 1 [Mus musculus]                                            | 0.22562379  | 0.26488474  | 0.06229013  | 0.43099124   | 4 | 4 | -0.21480241  | 0.205055 | 1.0131880 | 1.6862660 | 1.0614583 | 1.4672007 |
| NP_659149.1 | Na+/K+ -ATPase alpha 1 subunit [Mus musculus]                                                         | 0.29666534  | 0.39468428  | 0.30600123  | 0.30600123   | 4 | 3 | 0.376172     | 0.376172 | 4.3295796 | 1.9552392 | 2.1178620 | 1.5800381 |
| NP_659152.1 | aldolase 2, B isoform [Mus musculus]                                                                  | 0.14192046  | 0.89577108  | 0.89577108  | 0.89577108   | 8 | 2 | 0.376925312  | 0.733758 | 0.733758  | 0.7340154 | 0.0312222 | 0.1154107 |
| NP_659171.1 | E1B-55kDa associated protein 5 [Mus musculus]                                                         | 0.14192046  | 0.89577108  | 0.89577108  | 0.89577108   | 8 | 2 | 0.376925312  | 0.733758 | 0.733758  | 0.7340154 | 0.0312222 | 0.1154107 |
| NP_659171.1 | E1B-55kDa associated protein 5 [Mus musculus]                                                         | 0.14192046  | 0.89577108  | 0.89577108  | 0.89577108   | 8 | 2 | 0.376925312  | 0.733758 | 0.733758  | 0.7340154 | 0.0312222 | 0.1154107 |
| NP_660117.2 | ribonuclease/angiogenesis inhibitor 1 [Mus musculus]                                                  | 0.02996209  | -0.06962627 | -0.06962627 | -0.06962627  | 2 | 2 | -0.049794185 | 0.028046 | 0.2919974 | 0.6123062 | 0.7582619 | 0.7182152 |
| NP_660257.1 | UDP-GlcNAc:betaGal beta-1,3-N-acetylglucosaminyltransferase 7 [Mus musculus]                          | 0.69359150  | 0.69232059  | 1.14945478  | 1.14945478   | 6 | 3 | 0.078819106  | 1.063716 | 4.2188486 | 2.2652435 | 1.6536602 | 2.3153653 |
| NP_663342.2 | thioredoxin domain containing 5 [Mus musculus]                                                        | 0.28094325  | 0.81202043  | 0.29763620  | -0.05328867  | 5 | 4 | -0.071682413 | 0.519352 | 0.3903265 | 1.3695232 | 0.7582307 | 0.7124513 |
| NP_663392.1 | arginyl aminopeptidase (aminopeptidase B) [Mus musculus]                                              | 0.18612896  | 0.07167118  | 0.07167118  | 0.07167118   | 2 | 2 | -0.057228892 | 0.182292 | 0.9832907 | 0.9304445 | 1.0253066 | 0.8572654 |
| NP_663430.2 | basic transcription factor 3 [Mus musculus]                                                           | 0.23216914  | 0.28709839  | 0.22904799  | 0.50725475   | 5 | 4 | 0.197807999  | 0.310690 | 0.3454805 | 0.4664296 | 0.3897135 | 0.6448102 |
| NP_663469.1 | malic enzyme 2, NAD(+)-dependent, mitochondrial [Mus musculus]                                        | 0.46021090  | 0.45289935  | 0.45289935  | 0.45289935   | 3 | 2 | -0.456555128 | 0.005170 | 1.2141647 | 1.3738778 | 0.7447542 | 1.1023694 |
| NP_663493.1 | NADH dehydrogenase (ubiquinone) Fe-S protein 1 [Mus musculus]                                         | -0.1648779  | 0.20778747  | 0.53601042  | 0.77719611   | 5 | 4 | -0.421467979 | 0.289344 | 0.2810351 | 0.2692713 | 0.0682170 | 0.0557778 |
| NP_663531.1 | TAR DNA binding protein isoform 1 [Mus musculus]                                                      | 0.14538826  | 0.76552302  | 0.16877784  | 0.21252694   | 8 | 4 | 0.250359889  | 0.378636 | 0.9600372 | 0.7004739 | 0.6813681 | 0.8950898 |
| NP_663531.1 | TAR DNA binding protein isoform 1 [Mus musculus]                                                      | 0.14538826  | 0.76552302  | 0.16877784  | 0.21252694   | 8 | 4 | 0.250359889  | 0.378636 | 1.1344384 | 0.7669454 | 0.8742092 | 0.8024263 |
| NP_663533.1 | hydroxyacyl-Coenzyme A dehydrogenase/3-ketoacyl-Coenzyme A thiolase/enoyl-Coenzyme A hydratase (tri)  | 0.15704163  | -0.11310189 | 0.01279827  | 0.01279827   | 7 | 3 | -0.085781715 | 0.088154 | 0.6909610 | 0.2421157 | 0.0744971 | 0.2502737 |
| NP_663544.1 | methionine adenosyltransferase II, alpha [Mus musculus]                                               | 1.22718418  | 1.27837694  | 0.51946361  | 1.89094430   | 5 | 4 | 0.355668361  | 1.469664 | 0.5879812 | 0.0239641 | 0.1115764 | 0.0020950 |
| NP_663550.1 | caldesmon 1 [Mus musculus]                                                                            | 0.51862301  | 1.87501746  | 0.51021109  | 1.40147755   | 6 | 4 | -0.817020774 | 1.054991 | 0.9683420 | 1.0651189 | 0.7503470 | 0.9232508 |
| NP_663578.1 | carboxylesterase 2 [Mus musculus]                                                                     | 0.53880402  | 1.49920518  | 0.679106    | -1.019004606 | 8 | 2 | -1.019004606 | 0.679106 | 4.6673089 | 3.1105757 | 3.8877440 | 3.8652158 |
| NP_663586.2 | ankyrin repeat domain 25 [Mus musculus]                                                               | 0.58780421  | 0.31337639  | 0.637230    | -0.137213911 | 6 | 2 | -0.137213911 | 0.637230 | 1.3752782 | 0.5264041 | 0.3067193 | 0.2587488 |
| NP_663589.2 | dihydropyrimidine S-acetyltransferase (E2 component of pyruvate dehydrogenase complex) [Mus musculus] | 0.18326245  | 0.27823188  | 0.14070967  | 0.19391966   | 8 | 4 | -0.199030921 | 0.057587 | 0.1146065 | 0.4546556 | 0.1977210 | 0.3566461 |
| NP_663590.2 | electron transferring flavoprotein, alpha polypeptide [Mus musculus]                                  | 0.00848953  | 0.50172117  | 0.67010242  | 0.36616221   | 7 | 4 | -0.203537734 | 0.472298 | 0.6045909 | 0.6306584 | 0.5765377 | 0.1891801 |

|             |                                                                                                    |                 |                  |                  |                  |   |              |                  |           |                 |                        |                  |                 |   |                  |                 |
|-------------|----------------------------------------------------------------------------------------------------|-----------------|------------------|------------------|------------------|---|--------------|------------------|-----------|-----------------|------------------------|------------------|-----------------|---|------------------|-----------------|
|             |                                                                                                    | 6               | 9                | 9                |                  |   |              |                  |           | 13              | 32                     | 25               | 48              |   | 05               |                 |
| NP_663600.1 | eukaryotic translation initiation factor 4B [Mus musculus]                                         | 0.03067763<br>9 | 0.02845374<br>8  | 0.16605980<br>6  | 0.32189301<br>2  | 4 | 0.136771051  | 0.139183<br>837  | NM_145625 | 0.3575501<br>94 | 0.9073428<br>39        | 0.7329098<br>47  | 0.4913848<br>61 | 4 | 0.4435218<br>38  | 0.560619<br>482 |
| NP_663759.2 | histone 1, H1d [Mus musculus]                                                                      | 0.32372644<br>5 | 0.70576106       | 0.68960776<br>6  | 2.25654394<br>7  | 4 | 0.649105921  | 1.222714<br>596  | NM_145713 | 1.6875394<br>72 | 2.6447815<br>78        | 3.6608179<br>78  | 3.3989556<br>71 | 4 | 2.8480236<br>65  | 0.885473<br>811 |
| NP_666091.1 | chromodomain helicase DNA binding protein 4 [Mus musculus]                                         |                 | 0.07744318<br>9  | 0.32659500<br>7  |                  | 2 | 0.202019098  | 0.176176<br>939  | NM_145979 | 0.9013498<br>23 | 1.0799011<br>08        | 0.8341267<br>121 | 0.8267425<br>37 | 4 | 0.9105300<br>6   | 0.117797<br>341 |
| NP_666097.2 | archain 1 [Mus musculus]                                                                           |                 | 0.33623292<br>3  | 0.34441469<br>4  | 0.06465535<br>-  | 3 | 0.248434322  | 0.159209<br>825  | NM_145985 | 0.6228615<br>18 | 0.1335665<br>96        | 0.2558024<br>12  | 0.1268740<br>24 | 4 | 0.0900916<br>34  | 0.389385<br>151 |
| NP_666119.1 | procollagen, type VI, alpha 2 [Mus musculus]                                                       | 1.65318938<br>3 | 2.28488467<br>7  | 1.03602914<br>7  | 2.01846813<br>1  | 4 | -0.40353357  | 2.037150<br>439  | NM_146007 | 1.9433279<br>36 | 0.2778751<br>36        | 1.3444877<br>32  | 0.4448035<br>97 | 4 | -1.0026236<br>37 | 0.782776<br>942 |
| NP_666148.1 | AHA1, activator of heat shock 90kDa protein ATPase homolog 1 [Mus musculus]                        |                 | 0.29760928<br>1  | 0.35368796<br>2  |                  | 2 | 0.325648621  | 0.0396531<br>616 | NM_146036 | 0.7806531<br>02 | 0.9225118<br>49        | 0.9330090<br>46  | 0.9431240<br>64 | 4 | 0.8948245<br>15  | 0.076578<br>075 |
| NP_666153.1 | GDP-mannose 4, 6-dehydratase [Mus musculus]                                                        | 0.80511857<br>3 | 0.05920665<br>9  | 0.04181663<br>-  | 0.00945407<br>-  | 9 | -0.203263631 | 0.403441<br>421  | NM_146041 | 2.0662392<br>75 | 0.0178335<br>09        | 0.7112798<br>26  | 0.7874082<br>1  | 4 | 0.1463461<br>87  | 1.330404<br>028 |
| NP_666178.1 | G1 to S phase transition 1 [Mus musculus]                                                          |                 |                  | 0.30649688<br>1  | 1.32540106<br>2  | 2 | 0.509452091  | 1.153926<br>102  | NM_146066 | 1.0065442<br>13 | 1.7860463<br>7         | 1.8515232<br>37  | 1.3897084<br>58 | 4 | 1.5084555<br>69  | 0.391904<br>735 |
| NP_666232.2 | gelsolin [Mus musculus]                                                                            | 0.0845112       | 0.17670593<br>4  | 0.16127480<br>4  | 0.08045584<br>1  | 4 | 0.004871622  | 0.153573<br>982  | NM_146120 | 0.7540776<br>78 | 1.4752031<br>47        | 1.9118656<br>56  | 2.0664856<br>52 | 4 | 1.5519080<br>33  | 0.587870<br>885 |
| NP_666236.2 | Rho GTPase activating protein 1 [Mus musculus]                                                     |                 | 0.82421079<br>1  | 0.94237792<br>4  | 0.63322830<br>7  | 3 | 0.171687058  | 0.969522<br>648  | NM_146124 | 0.3421585<br>94 | 0.1238557<br>07        | 0.1332309<br>46  | 0.3449279<br>16 | 4 | 0.1741154<br>37  | 0.222016<br>328 |
| NP_666329.2 | alanyl-tRNA synthetase [Mus musculus]                                                              |                 | 0.09871375<br>-  | 0.59278404<br>9  |                  | 2 | 0.345748902  | 0.349360<br>454  | NM_146217 | 0.3614257<br>77 | 1.1574802<br>1.1503154 | 1.2171184<br>71  | 0.9715849<br>46 | 4 | 0.9715849<br>74  | 0.407873<br>575 |
| NP_666338.1 | acylpeptide hydrolase [Mus musculus]                                                               | 0.34898292<br>4 | 0.06203875<br>4  | 0.69582007<br>8  | 0.09102919<br>2  | 4 | 0.079461679  | 0.444534<br>644  | NM_146226 | 0.0172408<br>07 | 0.5092545<br>67        | 0.6771097<br>65  | 0.4439055<br>08 | 4 | 0.4032572<br>58  | 0.297041<br>819 |
| NP_666355.1 | actin-related protein 2 [Mus musculus]                                                             | 0.47762749<br>4 | 0.41042609<br>9  | 0.46662721<br>-  | 0.78369391<br>6  | 4 | 0.53459368   | 0.168654<br>581  | NM_146243 | 0.6610636<br>91 | 0.2773356<br>12        | 0.1926778<br>16  | 0.2244797<br>46 | 4 | 0.0083573<br>71  | 0.447644<br>487 |
| NP_694704.1 | NADH dehydrogenase (ubiquinone) Fe-S protein 2 [Mus musculus]                                      | 0.22996842<br>6 | 0.14695805<br>6  | 0.21578041<br>7  | 0.24023623<br>4  | 4 | -0.208235784 | 0.042064<br>308  | NM_153064 | 0.6344882<br>66 | 0.8011117<br>65        | 0.6100613<br>02  | 0.6101807<br>55 | 4 | 0.3467163<br>69  | 0.660303<br>402 |
| NP_694708.2 | EH-domain containing 2 [Mus musculus]                                                              | 0.12509947<br>5 | -0.73717238<br>- | 0.13658942<br>1  | 0.24518746<br>1  | 4 | -0.248462447 | 0.360976<br>549  | NM_153068 | 0.4943029<br>01 | 0.3870366<br>12        | 0.2108921<br>77  | 0.7018133<br>06 | 4 | 0.2549929<br>43  | 0.472956<br>841 |
| NP_705820.1 | SPFH domain family, member 2 [Mus musculus]                                                        |                 | 1.10020199<br>1  | 0.45894672<br>6  | 0.51214057<br>1  | 3 | 0.690429763  | 0.355968<br>453  | NM_153592 | 0.7607215<br>34 | 0.1198587<br>59        | 0.1737376<br>74  | 0.4513198<br>47 | 4 | 0.3764094<br>54  | 0.294506<br>056 |
| NP_705826.1 | UDP glucuronosyltransferase 2 family, polypeptide B34 [Mus musculus]                               | 0.39238085<br>7 | 0.10631640<br>7  | 0.52074399<br>8  | 0.83112592<br>8  | 4 | -0.462641797 | 0.300588<br>758  | NM_153598 | 1.9831910<br>73 | 1.1580864<br>07        | 1.6091112<br>61  | 1.7211971<br>08 | 4 | 1.6178964<br>82  | 0.344293<br>307 |
| NP_724476.1 | brain glycogen phosphorylase [Mus musculus]                                                        | 0.06015515<br>2 | 0.44545579<br>3  | 0.0355256<br>-   | 0.54081540<br>5  | 4 | -0.252725188 | 0.283026<br>969  | NM_153781 | 0.7723482<br>82 | 0.4912821<br>47        | 0.2132160<br>78  | 0.6389338<br>93 | 4 | 0.1427709<br>59  | 0.635096<br>697 |
| NP_742146.1 | pyridoxal (pyridoxine, vitamin B6) kinase [Mus musculus]                                           | 0.49648046<br>3 | 0.03161375<br>9  |                  |                  | 2 | -0.264047111 | 0.328710<br>399  | NM_172134 | 0.3338537<br>74 | 0.7345547<br>99        | 1.0670472<br>99  | 0.6140925<br>05 | 4 | 0.6873870<br>92  | 0.303712<br>892 |
| NP_766184.1 | SEC24 related gene family, member C [Mus musculus]                                                 | 0.29487931<br>9 | 0.74058556<br>9  |                  | 0.52598121<br>8  | 3 | 0.520482035  | 0.222904<br>006  | NM_172596 | 0.1391887<br>87 | 0.2560883<br>64        | 0.2583599<br>58  | 0.0255486<br>5  | 4 | 0.1570221<br>15  | 0.133832<br>721 |
| NP_766273.1 | calcium-binding transporter [Mus musculus]                                                         | 0.76882785<br>8 | 0.01424251<br>5  |                  | 0.13250461<br>2  | 3 | -0.295696652 | 0.416261<br>376  | NM_172685 | 0.5099159<br>63 | 0.1256447<br>15        | 0.2706948<br>3   | 0.1310389<br>53 | 4 | 0.0611538<br>43  | 0.342193<br>226 |
| NP_766321.1 | deoxyribose-phosphate aldolase-like [Mus musculus]                                                 |                 |                  | 1.14029346<br>-  | 0.53389787<br>3  | 2 | 0.837095666  | 0.428786<br>432  | NM_172733 | 0.1770587<br>67 | 0.2919881<br>15        | 0.4542544<br>56  | 0.3889822<br>1  | 4 | 0.2395415<br>03  | 0.285622<br>484 |
| NP_766333.1 | Tu translation elongation factor, mitochondrial [Mus musculus]                                     | 0.28954805<br>1 | 0.01202993<br>1  | 0.02007741<br>7  | 0.41361098<br>3  | 4 | 0.029003862  | 0.289882<br>186  | NM_172745 | 0.3488004<br>5  | 0.6298394<br>54        | 0.8724745<br>-   | 0.6527128<br>65 | 4 | 0.6259573<br>17  | 0.214721<br>892 |
| NP_766347.1 | carboxylesterase 5 [Mus musculus]                                                                  |                 | 0.56585268<br>3  |                  | 0.08659050<br>2  | 2 | 0.239631091  | 0.461347<br>001  | NM_172759 | 4.4181643<br>66 | 0.6321179<br>94        | 0.8416437<br>4   | 1.1242182<br>52 | 4 | 1.7540360<br>88  | 1.787494<br>522 |
| NP_766355.2 | loss of heterozygosity, 11, chromosomal region 2, gene A homolog [Mus musculus]                    | 0.87852049<br>7 | 0.75750632<br>8  | 0.00981587<br>7  |                  | 3 | -0.043610015 | 0.818536<br>79   | NM_172767 | 0.3620901<br>62 | 0.8390860<br>47        | 0.0241799<br>79  | 0.3483553<br>18 | 4 | 0.3934278<br>77  | 0.335643<br>065 |
| NP_766549.2 | 4-aminotyrate aminotransferase [Mus musculus]                                                      | 0.38175605<br>7 |                  |                  | 0.46862516<br>3  | 2 | -0.42519061  | 0.061425<br>735  | NM_172961 | 5.2154271<br>09 | 3.8439967<br>47        | 4.6097692<br>82  | 4.6597760<br>5  | 4 | 4.5822422<br>97  | 0.563530<br>158 |
| NP_766594.1 | paraoxonase 3 [Mus musculus]                                                                       | 0.82621129<br>9 |                  | -0.97361005<br>- | 0.45689195<br>2  | 3 | -0.447643132 | 0.786809<br>625  | NM_173006 | 1.0763047<br>03 | 1.2490816<br>43        | 1.0938416<br>28  | 0.8021043<br>13 | 4 | 1.0553330<br>72  | 0.185818<br>936 |
| NP_766599.1 | isocitrate dehydrogenase 2 (NADP+), mitochondrial [Mus musculus]                                   |                 | 0.20440642<br>2  | 0.40010554<br>3  | 0.21312276<br>6  | 3 | -0.27254491  | 0.110556<br>682  | NM_173011 | 0.3255489<br>53 | 0.6662163<br>24        | 0.3612400<br>24  | 0.6888050<br>39 | 4 | 0.5099525<br>85  | 0.193058<br>947 |
| NP_766635.1 | carbonyl reductase 3 [Mus musculus]                                                                | 0.34196851<br>3 |                  |                  | -0.02864127<br>- | 2 | -0.185304891 | 0.221555<br>818  | NM_173047 | 4.0859715<br>57 | 1.8840710<br>23        | 2.8439655<br>83  | 1.6626514<br>04 | 4 | 2.6191648<br>92  | 1.104134<br>38  |
| NP_775550.2 | splicing factor, arginine/serine-rich 1 (ASF/SF2) [Mus musculus]                                   | 0.04589413<br>3 |                  | 0.32913023<br>6  | 0.17837147<br>8  | 3 | 0.065550964  | 0.254321<br>235  | NM_173374 | 0.7972627<br>43 | 1.1182243<br>99        | 1.1262680<br>09  | 0.7680554<br>01 | 4 | 0.9524526<br>38  | 0.196450<br>422 |
| NP_776101.1 | monoamine oxidase A [Mus musculus]                                                                 | 0.71456360<br>8 | 0.03546363<br>9  | -0.41214121<br>- | 1.10314097<br>8  | 4 | -0.566327359 | 0.453038<br>815  | NM_173740 | 2.7671661<br>03 | 3.1961203<br>16        | 3.1410947<br>6   | 2.6464857<br>37 | 4 | 2.9377167<br>29  | 0.272052<br>718 |
| NP_780612.1 | hypothetical protein LOC109154 [Mus musculus]                                                      |                 |                  | 0.23929207<br>1  | 0.26924895<br>5  | 2 | -0.014978442 | 0.359592<br>809  | NM_175403 | 0.0918513<br>12 | 0.4401348<br>73        | 0.9426343<br>04  | 0.6806395<br>47 | 4 | 0.5388150<br>09  | 0.361800<br>377 |
| NP_787030.1 | spectrin beta 2 isoform 1 [Mus musculus]                                                           | 0.54028920<br>2 | 0.50014443<br>7  | 0.30166856<br>-  | 0.46966226<br>-  | 4 | 0.182796514  | 0.489892<br>905  | NM_175836 | 0.1522550<br>38 | 0.0062176<br>95        | 0.2378733<br>85  | 0.3410378<br>28 | 4 | 0.1812371<br>39  | 0.146882<br>268 |
| NP_787030.1 | spectrin beta 2 isoform 1 [Mus musculus]                                                           | 0.54028920<br>2 | 0.50014443<br>7  | 0.30166856<br>-  | 0.46966226<br>-  | 4 | 0.182796514  | 0.489892<br>905  | NM_009260 | 2.3402983<br>76 | 0.8618055<br>07        | 0.4719730<br>76  | 0.5350594<br>12 | 4 | 1.0522840<br>84  | 0.875508<br>433 |
| NP_796188.2 | US snRNP-specific protein, 200 kDa [Mus musculus]                                                  |                 | 0.23001630<br>1  |                  | 0.18586166<br>9  | 2 | 0.207938985  | 0.031222<br>04   | NM_177214 | 0.9044502<br>89 | 1.0372737<br>97        | 1.1196259<br>34  | 0.6030137<br>71 | 4 | 0.9160909<br>48  | 0.226763<br>163 |
| NP_796275.2 | heterogeneous nuclear ribonucleoprotein L [Mus musculus]                                           | 0.05025570<br>1 | 0.17574740<br>3  | 0.55401577<br>9  | -0.36607368<br>- | 4 | 0.0156126    | 0.397232<br>591  | NM_177301 | 0.7009268<br>28 | 0.6247685<br>74        | 0.4371154<br>96  | 0.5171835<br>71 | 4 | 0.5699986<br>17  | 0.116317<br>522 |
| NP_796363.1 | melanoma inhibitory activity 3 [Mus musculus]                                                      | 0.11500137<br>2 |                  | 0.01378718<br>1  | 0.08827239<br>6  | 3 | 0.07355365   | 0.050444<br>164  | NM_177389 | 0.8027992<br>9  | 0.2902197<br>98        | 0.2852932<br>79  | 0.1176624<br>66 | 4 | 0.0274059<br>36  | 0.523114<br>583 |
| NP_803421.1 | acetyl-Coenzyme A acyltransferase 2 (mitochondrial 3-oxoacetyl-Coenzyme A thiolase) [Mus musculus] | 0.26113231<br>9 | 0.62328231<br>1  | 0.31611419<br>6  | 1.01256688<br>6  | 4 | -0.553273928 | 0.345177<br>565  | NM_177470 | 1.2291133<br>95 | 0.8462077<br>49        | 0.8904955<br>61  | 0.6132741<br>91 | 4 | 0.8947727<br>24  | 0.253904<br>155 |
| NP_808383.2 | potassium channel tetramerisation domain containing 12 [Mus musculus]                              | 0.99724882<br>2 | -0.42040916<br>7 | 0.76560058<br>-  | 0.67383601<br>2  | 4 | 0.504069065  | 0.631164<br>483  | NM_177715 | 0.2883433<br>-  | 0.3676384<br>-         | 0.4176758<br>-   | 0.3423990<br>-  | 4 | 0.3540141<br>-   | 0.053808<br>304 |

|             |                                                                                                     |            |             |   |   |              |          |     |           |           |           |           |           |           |          |
|-------------|-----------------------------------------------------------------------------------------------------|------------|-------------|---|---|--------------|----------|-----|-----------|-----------|-----------|-----------|-----------|-----------|----------|
|             |                                                                                                     |            |             |   |   |              |          |     |           | 59        | 12        | 9         | 68        |           | 82       |
| NP_808578.1 | GDP-mannose pyrophosphorylase B [Mus musculus]                                                      | 0.58081768 | 0.46485297  | 8 | 2 | 0.057982351  | 0.739400 | 813 | NM_177910 | 1.0796266 | 0.2574746 | 0.9694942 | 0.8123330 | 0.2399188 | 0.931208 |
|             |                                                                                                     |            |             |   |   |              |          |     |           | 31        | 28        | 8         | 91        | 42        | 329      |
| NP_808580.1 | hypothetical protein LOC331063 [Mus musculus]                                                       | 1.86355040 | 1.92453820  | 4 | 2 | -0.0304939   | 2.678583 | 142 | NM_177912 | 3.9530944 | 1.1811323 | 0.2577100 | 0.7263768 | 1.5295784 | 1.659078 |
|             |                                                                                                     |            |             |   |   |              |          |     |           | 33        | 43        | 26        | 43        | 11        | 712      |
| NP_848476.1 | galactose-4-epimerase, UDP [Mus musculus]                                                           | 0.29225364 | 0.70199422  | 8 | 4 | 0.008659634  | 0.465206 | 335 | NM_178389 | 0.1033119 | 0.2339566 | 0.0879701 | 0.0276611 | 0.0554093 | 0.143332 |
|             |                                                                                                     |            |             |   |   |              |          |     |           | 64        | 49        | 6         | 67        | 2         | 009      |
| NP_848692.2 | hypothetical protein LOC235043 [Mus musculus]                                                       | 0.16498942 | 0.14312597  | 4 | 2 | 0.154057698  | 0.015459 | 795 | NM_178577 | 0.9533933 | 0.3997229 | 0.6021028 | 0.2778985 | 0.5582794 | 0.295403 |
|             |                                                                                                     |            |             |   |   |              |          |     |           | 63        | 97        | 82        | 62        | 51        | 164      |
| NP_848713.1 | transgelin 2 [Mus musculus]                                                                         | 1.07087398 | 0.10134353  | 2 | 2 | -0.484765225 | 0.828882 | 953 | NM_178598 | 0.5647277 | 0.7656375 | 0.5286428 | 0.5685519 | 0.6068900 | 0.107348 |
|             |                                                                                                     |            |             |   |   |              |          |     |           | 76        | 06        | 7         | 23        | 19        | 102      |
| NP_848780.2 | LIM domain containing preferred translocation partner in lipoma [Mus musculus]                      | 0.45275349 | 0.71663286  | 4 | 4 | -0.360369218 | 0.646763 | 198 | NM_178665 | 0.4600870 | 0.1007528 | 0.4994806 | 0.7363796 | 0.2191315 | 0.523288 |
|             |                                                                                                     |            |             |   |   |              |          |     |           | 41        | 7         | 44        | 6         | 33        | 521      |
| NP_849209.1 | hydroxyacyl-Coenzyme A dehydrogenase/3-ketoacyl-Coenzyme A thiolase/enoyl-Coenzyme A hydratase (tri | 0.29615629 | 0.26319870  | 4 | 4 | -0.073792659 | 0.250537 | 144 | NM_178878 | 1.0131880 | 0.2234562 | 0.3246514 | 0.2355397 | 0.0573851 | 0.638797 |
|             |                                                                                                     |            |             |   |   |              |          |     |           | 69        | 57        | 68        | 44        | 5         | 852      |
| NP_851009.1 | glycyl-tRNA synthetase [Mus musculus]                                                               | 0.69390222 | 0.33714500  | 2 | 2 | 0.515523612  | 0.252265 | 45  | NM_180678 | 0.4185629 | 1.1791632 | 1.0012331 | 0.9282340 | 0.8817983 | 0.326309 |
|             |                                                                                                     |            |             |   |   |              |          |     |           | 4         | 3         | 97        | 3         | 49        | 604      |
| NP_852109.1 | retinoic acid induced 3 [Mus musculus]                                                              | 0.30400051 | 0.27422014  | 9 | 2 | -0.289110332 | 0.021057 | 905 | NM_181444 | 0.8985815 | 0.6087945 | 0.7063818 | 0.0493923 | 0.1164967 | 0.736027 |
|             |                                                                                                     |            |             |   |   |              |          |     |           | 5         | 41        | 31        | 24        | 86        | 283      |
| NP_853557.1 | premature ovarian failure 1B [Mus musculus]                                                         | 0.54461667 | 4.95385601  | 6 | 2 | 2.749236343  | 3.117803 | 041 | NM_181579 | 1.9167525 | 0.6610493 | 0.5657946 | 0.5617038 | 0.9263250 | 0.661878 |
|             |                                                                                                     |            |             |   |   |              |          |     |           | 11        | 17        | 76        | 78        | 96        | 266      |
| NP_853613.1 | eukaryotic translation initiation factor 5A [Mus musculus]                                          | 0.36357559 | 0.29365891  | 2 | 3 | 0.005683694  | 0.336072 | 349 | NM_181582 | 0.3654120 | 1.2524584 | 0.9828281 | 0.9731369 | 0.8934588 | 0.375077 |
|             |                                                                                                     |            |             |   |   |              |          |     |           | 49        | 49        | 14        | 26        | 95        | 571      |
| NP_938085.1 | p47 protein [Mus musculus]                                                                          | 0.39738437 | 0.14754898  | 4 | 4 | 0.103955193  | 0.396524 | 948 | NM_198326 | 0.2591103 | 0.9435572 | 1.2282598 | 1.0938898 | 0.8812043 | 0.430724 |
|             |                                                                                                     |            |             |   |   |              |          |     |           | 91        | 44        | 82        | 41        | 4         | 752      |
| NP_938085.1 | p47 protein [Mus musculus]                                                                          | 0.39738437 | 0.14754898  | 4 | 4 | 0.103955193  | 0.396524 | 948 | NM_011504 | 0.7872969 | 0.1881086 | 0.0906036 | 0.1185673 | 0.2961441 | 0.329991 |
|             |                                                                                                     |            |             |   |   |              |          |     |           | 58        | 76        | 16        | 37        | 47        | 505      |
| NP_942602.1 | UDP-glucose ceramide glucosyltransferase-like 1 [Mus musculus]                                      | 0.02706312 | 0.28446196  | 8 | 4 | 0.158678213  | 0.149888 | 183 | NM_198899 | 0.1352024 | 1.8932993 | 2.0052179 | 1.5635113 | 1.3993077 | 0.863342 |
|             |                                                                                                     |            |             |   |   |              |          |     |           | 73        | 13        | 21        | 84        | 73        | 3        |
| XP_125901.5 | PREDICTED: TBP-interacting protein [Mus musculus]                                                   | 0.33999919 | 0.79756491  | 2 | 3 | -0.05078546  | 0.646963 | 869 | XM_125901 | 0.2579477 | 0.2884478 | 0.0901894 | 0.1592711 | 0.0248954 | 0.245466 |
|             |                                                                                                     |            |             |   |   |              |          |     |           | 17        | 07        | 28        | 35        | 49        | 532      |
| XP_129647.3 | PREDICTED: glutamyl-prolyl-tRNA synthetase [Mus musculus]                                           | 0.10270582 | 0.12382472  | 7 | 3 | 0.188343058  | 0.522507 | 666 | NM_029735 | 0.5937946 | 1.2843627 | 1.1294996 | 0.9717924 | 0.9948623 | 0.296268 |
|             |                                                                                                     |            |             |   |   |              |          |     |           | 47        | 95        | 47        | 36        | 81        | 59       |
| XP_129846.3 | PREDICTED: glutaminase [Mus musculus]                                                               | 0.66045537 | 0.26799458  | 1 | 2 | -0.46422498  | 0.277511 | 681 | XM_900176 | 0.3064146 | 0.3546631 | 0.0851939 | 0.1115897 | 0.0371338 | 0.279207 |
|             |                                                                                                     |            |             |   |   |              |          |     |           | 47        | 2         | 1         | 75        | 03        | 49       |
| XP_132230.5 | PREDICTED: SEC31-like 1 [Mus musculus]                                                              | 1.58070783 | 0.02434274  | 4 | 4 | -0.438569263 | 0.816547 | 17  | XM_132230 | 0.3786998 | 0.4418532 | 0.1573739 | 0.0415280 | 0.2340997 | 0.220550 |
|             |                                                                                                     |            |             |   |   |              |          |     |           | 03        | 54        | 75        | 54        | 44        | 995      |
| XP_284175.4 | PREDICTED: filamin C, gamma [Mus musculus]                                                          | 1.29375342 | 1.54162903  | 4 | 4 | -0.574443174 | 1.297071 | 246 | XM_898823 | 0.6843171 | 0.0403446 | 0.2187349 | 2.0996121 | 0.7607522 | 0.932944 |
|             |                                                                                                     |            |             |   |   |              |          |     |           | 88        | 64        | 4         | 32        | 31        | 792      |
| XP_354836.2 | PREDICTED: LIM domain only 7 [Mus musculus]                                                         | 0.19331891 | 0.56113821  | 3 | 2 | 0.183909653  | 0.533481 | 753 | XM_895740 | 1.1028801 | 0.9408081 | 0.9200232 | 0.5957919 | 0.8898758 | 0.212414 |
|             |                                                                                                     |            |             |   |   |              |          |     |           | 28        | 42        | 04        | 1         | 46        | 02       |
| XP_355766.2 | PREDICTED: similar to Filamin C (Gamma-filamin) (Filamin 2) (Protein FLNc) (Actin-binding like prot | 0.90627385 | 0.88358850  | 4 | 3 | -0.654443147 | 1.459696 | 578 | XM_898823 | 0.6843171 | 0.0403446 | 0.2187349 | 2.0996121 | 0.7607522 | 0.932944 |
|             |                                                                                                     |            |             |   |   |              |          |     |           | 88        | 64        | 4         | 32        | 31        | 792      |
| XP_619598.1 | PREDICTED: similar to AHNAK [Mus musculus]                                                          | 0.19039988 | 0.16125893  | 9 | 4 | -0.079577652 | 0.295572 | 546 | NM_009643 | 0.9700030 | 0.9118413 | 0.4297997 | 0.1477678 | 0.6148529 | 0.394439 |
|             |                                                                                                     |            |             |   |   |              |          |     |           | 04        | 04        | 65        | 48        | 8         | 187      |
| XP_619639.1 | PREDICTED: tensin [Mus musculus]                                                                    | 0.47896272 | -2.09457201 | 3 | 4 | -0.981679629 | 1.292307 | 161 | XM_619639 | 1.7822144 | 1.4280552 | 2.0917235 | 2.5007768 | 1.9506925 | 0.456076 |
|             |                                                                                                     |            |             |   |   |              |          |     |           | 23        | 87        | 23        | 95        | 32        | 423      |
| XP_619776.1 | PREDICTED: catenin src [Mus musculus]                                                               | 0.68141452 | 0.53821468  | 8 | 4 | 0.030429204  | 0.532510 | 836 | NM_007615 | 0.2753878 | 0.7412678 | 0.8801991 | 0.4906235 | 0.4591756 | 0.515560 |
|             |                                                                                                     |            |             |   |   |              |          |     |           | 39        | 64        | 56        | 4         | 8         | 956      |
| XP_619958.1 | PREDICTED: synaptodin 2 [Mus musculus]                                                              | 0.62333804 | 1.32543123  | 3 | 3 | -0.329509236 | 0.975098 | 454 | XM_901510 | 4.5178222 | 3.4742931 | 4.3052813 | 2.9985814 | 3.8239945 | 0.711016 |
|             |                                                                                                     |            |             |   |   |              |          |     |           | 09        | 57        | 4         | 3         | 24        | 089      |
| XP_619958.1 | PREDICTED: synaptodin 2 [Mus musculus]                                                              | 0.62333804 | 1.32543123  | 3 | 3 | -0.329509236 | 0.975098 | 454 | XM_619958 | 3.9198751 | 0.9586804 | 0.2005591 | 1.3245815 | 1.6009240 | 1.615280 |
|             |                                                                                                     |            |             |   |   |              |          |     |           | 52        | 08        | 93        | 92        | 86        | 986      |
| XP_620792.1 | PREDICTED: source of immunodominant MHC-associated peptides [Mus musculus]                          | 0.36504425 | 0.14759807  | 8 | 4 | 0.134000268  | 0.171751 | 681 | NM_024222 | 0.0798923 | 0.6750127 | 0.7675759 | 0.3985457 | 0.4802567 | 0.309542 |
|             |                                                                                                     |            |             |   |   |              |          |     |           | 71        | 58        | 52        | 77        | 14        | 967      |
| XP_621113.1 | PREDICTED: HECT, UBA and WWE domain containing 1 [Mus musculus]                                     | 0.38979504 | 0.49430955  | 6 | 2 | 0.442052302  | 0.073902 | 919 | NM_021523 | 1.2384147 | 1.3360959 | 1.1190046 | 1.3006601 | 1.2485439 | 0.095331 |
|             |                                                                                                     |            |             |   |   |              |          |     |           | 94        | 63        | 86        | 61        | 01        | 833      |
| XP_621314.1 | PREDICTED: desmoplakin [Mus musculus]                                                               | 0.09420344 | 0.16039076  | 9 | 4 | 0.350390204  | 0.387230 | 026 | XM_621314 | 0.1935023 | 1.2043053 | 0.8669173 | 0.0772594 | 0.4887449 | 0.655698 |
|             |                                                                                                     |            |             |   |   |              |          |     |           | 12        | 29        | 68        | 94        | 7         | 772      |
