# Supplementary material
Source: PubMed Central journal article supplement (PMC2761368)
Supplement: 0909282106_ST7_PDF.pdf [file 0909282106_ST7_PDF.pdf]

**Table S7. mRNA versus protein qualitative comparison**

| Threshold |      | # Matching Assignments |      |      | Concordance |
|-----------|------|------------------------|------|------|-------------|
| Low       | High | Up                     | Same | Down |             |
| -0.1      | 0.1  | 155                    | 11   | 113  | 0.49        |
| -0.2      | 0.2  | 94                     | 50   | 86   | 0.40        |
| -0.3      | 0.3  | 58                     | 103  | 54   | 0.38        |
| -0.4      | 0.4  | 29                     | 149  | 42   | 0.38        |
| -0.5      | 0.5  | 14                     | 203  | 31   | 0.43        |
| -0.6      | 0.6  | 6                      | 255  | 23   | 0.50        |
| -0.7      | 0.7  | 4                      | 289  | 15   | 0.54        |
| -0.8      | 0.8  | 3                      | 329  | 12   | 0.60        |
| -0.9      | 0.9  | 2                      | 366  | 9    | 0.66        |
| -1.0      | 1.0  | 2                      | 398  | 6    | 0.71        |
| -1.1      | 1.1  | 1                      | 427  | 5    | 0.76        |
| -1.2      | 1.2  | 1                      | 445  | 3    | 0.78        |
| -1.3      | 1.3  | 0                      | 466  | 2    | 0.82        |
| -1.4      | 1.4  | 0                      | 485  | 2    | 0.85        |
| -1.5      | 1.5  | 0                      | 496  | 2    | 0.87        |

The level of qualitative agreement among a total of 573 protein and mRNA observations in our experiment is shown, using a variety of thresholds to distinguish proteins whose expression is classified as “up”, “down”, or “same”. Except at extremely low thresholds, the agreement among protein and mRNA measurements is dominated by those species that are unchanged in expression.
